# Supplementary material
Source: publisher figshare collection journal article supplement (https://tandf.figshare.com/articles/dataset/_/3503471)
Supplement: Supplementary file 3 [file 1]

Archive with 8 entries (8 files):
- 2016CC7185R-s02.pdf
- 2016CC7185R-s03.pdf
- 2016CC7185R-s04.pdf
- 2016CC7185R-s05.pdf
- 2016CC7185R-s06.pdf
- 2016CC7185R-s07.xls
- 2016CC7185R-s08.xls
- 2016CC7185R-s09.xlsx
