# Supplementary material
Source: publisher figshare collection journal article supplement (https://tandf.figshare.com/articles/dataset/_/3503471)
Supplement: Supplementary file 3 [file 1 › 2016CC7185R-s02.pdf]

Now includes comprehensive GO annotations directly imported from the GO database

Analysis Summary: Please report in publication ?

Analysis Type: PANTHER Overrepresentation Test (release 20160321)

Annotation Version and Release Date: PANTHER version 10.0 Released 2015-05-15

Analyzed List: Client Text Box Input (Homo sapiens)Change

Reference List: Homo sapiens (all genes in database)Change

Annotation Data Set: PANTHER GO-Slim Biological ProcessMUUSE CELLS

☒ Use the Bonferroni correction for multiple testing ?

Results ?

|               |                       |                       |
|---------------|-----------------------|-----------------------|
|               | Reference list        | Client Text Box Input |
| Mapped IDs:   | <a href="#">20814</a> | <a href="#">187</a>   |
| Unmapped IDs: | <a href="#">0</a>     | <a href="#">7</a>     |

Export resultsView: -- Please select a chart to display --

Displaying only results with P<0.05; [click here to display all results](#)

|                                                                  | <a href="#">Homo sapiens</a> (REF) | <a href="#">Client Text Box Input</a> (▼ <a href="#">Hierarchy</a> <span>NEW!</span> ?) |                          |                                 |                     |                         |
|------------------------------------------------------------------|------------------------------------|-----------------------------------------------------------------------------------------|--------------------------|---------------------------------|---------------------|-------------------------|
| <a href="#">PANTHER GO-Slim Biological Process</a>               | #                                  | #                                                                                       | <a href="#">expected</a> | <a href="#">Fold Enrichment</a> | <a href="#">+/-</a> | <a href="#">P value</a> |
| <a href="#">glycolysis</a>                                       | <a href="#">25</a>                 | <a href="#">6</a>                                                                       | .22                      | 26.71                           | +                   | 3.02E-05                |
| ↳ <a href="#">monosaccharide metabolic process</a>               | <a href="#">143</a>                | <a href="#">8</a>                                                                       | 1.28                     | 6.23                            | +                   | 1.18E-02                |
| ↳ <a href="#">generation of precursor metabolites and energy</a> | <a href="#">274</a>                | <a href="#">10</a>                                                                      | 2.46                     | 4.06                            | +                   | 4.72E-02                |
| <a href="#">regulation of liquid surface tension</a>             | <a href="#">56</a>                 | <a href="#">8</a>                                                                       | .50                      | 15.90                           | +                   | 1.26E-05                |
| ↳ <a href="#">homeostatic process</a>                            | <a href="#">209</a>                | <a href="#">11</a>                                                                      | 1.88                     | 5.86                            | +                   | 8.33E-04                |
| <a href="#">cell-matrix adhesion</a>                             | <a href="#">89</a>                 | <a href="#">7</a>                                                                       | .80                      | 8.75                            | +                   | 4.18E-03                |
| ↳ <a href="#">cell adhesion</a>                                  | <a href="#">579</a>                | <a href="#">18</a>                                                                      | 5.20                     | 3.46                            | +                   | 1.31E-03                |
| ↳ <a href="#">biological adhesion</a>                            | <a href="#">606</a>                | <a href="#">20</a>                                                                      | 5.44                     | 3.67                            | +                   | 1.56E-04                |
| <a href="#">cellular component morphogenesis</a>                 | <a href="#">478</a>                | <a href="#">31</a>                                                                      | 4.29                     | 7.22                            | +                   | 2.42E-15                |
| ↳ <a href="#">anatomical structure morphogenesis</a>             | <a href="#">596</a>                | <a href="#">35</a>                                                                      | 5.35                     | 6.54                            | +                   | 3.16E-16                |
| ↳ <a href="#">developmental process</a>                          | <a href="#">2456</a>               | <a href="#">54</a>                                                                      | 22.07                    | 2.45                            | +                   | 5.77E-08                |
| ↳ <a href="#">cellular component organization</a>                | <a href="#">1206</a>               | <a href="#">37</a>                                                                      | 10.84                    | 3.41                            | +                   | 1.17E-08                |
| ↳ <a href="#">cellular component organization or biogenesis</a>  | <a href="#">1316</a>               | <a href="#">39</a>                                                                      | 11.82                    | 3.30                            | +                   | 8.79E-09                |
| <a href="#">macrophage activation</a>                            | <a href="#">167</a>                | <a href="#">10</a>                                                                      | 1.50                     | 6.66                            | +                   | 7.60E-04                |
| ↳ <a href="#">immune system process</a>                          | <a href="#">1391</a>               | <a href="#">28</a>                                                                      | 12.50                    | 2.24                            | +                   | 1.20E-02                |
| <a href="#">blood circulation</a>                                | <a href="#">154</a>                | <a href="#">8</a>                                                                       | 1.38                     | 5.78                            | +                   | 1.96E-02                |
| <a href="#">protein folding</a>                                  | <a href="#">155</a>                | <a href="#">8</a>                                                                       | 1.39                     | 5.74                            | +                   | 2.05E-02                |
| <a href="#">cell-cell adhesion</a>                               | <a href="#">391</a>                | <a href="#">16</a>                                                                      | 3.51                     | 4.55                            | +                   | 1.42E-04                |
| <a href="#">regulation of catalytic activity</a>                 | <a href="#">1073</a>               | <a href="#">26</a>                                                                      | 9.64                     | 2.70                            | +                   | 9.97E-04                |

|                                                                                  |                      |                    |       |       |   |          |
|----------------------------------------------------------------------------------|----------------------|--------------------|-------|-------|---|----------|
| ↳ <a href="#">regulation of molecular function</a>                               | <a href="#">1096</a> | <a href="#">26</a> | 9.85  | 2.64  | + | 1.45E-03 |
| <a href="#">cellular process</a>                                                 | <a href="#">6708</a> | <a href="#">93</a> | 60.27 | 1.54  | + | 1.15E-04 |
| Unclassified                                                                     | <a href="#">8629</a> | <a href="#">36</a> | 77.53 | .46   | - | 0.00E00  |
| <a href="#">regulation of transcription from RNA polymerase II promoter</a>      | <a href="#">1319</a> | <a href="#">1</a>  | 11.85 | < 0.2 | - | 1.45E-02 |
| ↳ <a href="#">transcription from RNA polymerase II promoter</a>                  | <a href="#">1723</a> | <a href="#">1</a>  | 15.48 | < 0.2 | - | 3.79E-04 |
| ↳ <a href="#">transcription, DNA-dependent</a>                                   | <a href="#">1941</a> | <a href="#">1</a>  | 17.44 | < 0.2 | - | 5.01E-05 |
| ↳ <a href="#">RNA metabolic process</a>                                          | <a href="#">2360</a> | <a href="#">2</a>  | 21.20 | < 0.2 | - | 1.15E-05 |
| ↳ <a href="#">regulation of nucleobase-containing compound metabolic process</a> | <a href="#">1700</a> | <a href="#">2</a>  | 15.27 | < 0.2 | - | 4.13E-03 |

Now includes comprehensive GO annotations directly imported from the GO database

Analysis Summary: Please report in publication ?

Analysis Type: PANTHER Overrepresentation Test (release 20160321)

Annotation Version and Release Date: PANTHER version 10.0 Released 2015-05-15

Analyzed List: Client Text Box Input (Homo sapiens)Change

Reference List: Homo sapiens (all genes in database)Change

Annotation Data Set: PANTHER GO-Slim Molecular Function MUSE CELLS

☒ Use the Bonferroni correction for multiple testing ?

Results ?

|               | Reference list | Client Text Box Input |
|---------------|----------------|-----------------------|
| Mapped IDs:   | 20814          | 187                   |
| Unmapped IDs: | 0              | 7                     |

Export resultsView: -- Please select a chart to display --

Displaying only results with P<0.05; [click here to display all results](#)

|                                                             | Homo sapiens (REF) | Client Text Box Input (▼ Hierarchy NEW! ?) |          |                 |     |          |
|-------------------------------------------------------------|--------------------|--------------------------------------------|----------|-----------------|-----|----------|
| PANTHER GO-Slim Molecular Function                          | #                  | #                                          | expected | Fold Enrichment | ±/- | P value  |
| <a href="#">peroxidase activity</a>                         | 27                 | 4                                          | .24      | 16.49           | +   | 1.95E-02 |
| ↳ <a href="#">antioxidant activity</a>                      | 30                 | 4                                          | .27      | 14.84           | +   | 2.92E-02 |
| <a href="#">extracellular matrix structural constituent</a> | 76                 | 9                                          | .68      | 13.18           | +   | 6.89E-06 |
| ↳ <a href="#">structural molecule activity</a>              | 1034               | 40                                         | 9.29     | 4.31            | +   | 8.29E-13 |
| <a href="#">peptidase inhibitor activity</a>                | 226                | 20                                         | 2.03     | 9.85            | +   | 6.08E-12 |
| ↳ <a href="#">enzyme inhibitor activity</a>                 | 362                | 20                                         | 3.25     | 6.15            | +   | 2.64E-08 |
| ↳ <a href="#">enzyme regulator activity</a>                 | 1002               | 24                                         | 9.00     | 2.67            | +   | 2.22E-03 |
| ↳ <a href="#">peptidase activity</a>                        | 630                | 29                                         | 5.66     | 5.12            | +   | 1.22E-10 |
| <a href="#">cysteine-type peptidase activity</a>            | 92                 | 7                                          | .83      | 8.47            | +   | 3.94E-03 |
| <a href="#">isomerase activity</a>                          | 166                | 9                                          | 1.49     | 6.03            | +   | 3.91E-03 |
| <a href="#">structural constituent of cytoskeleton</a>      | 663                | 29                                         | 5.96     | 4.87            | +   | 4.19E-10 |
| <a href="#">serine-type peptidase activity</a>              | 322                | 14                                         | 2.89     | 4.84            | +   | 2.78E-04 |
| Unclassified                                                | 10020              | 52                                         | 90.02    | .58             | -   | 0.00E00  |

|                                        |                      |                   |       |       |   |          |
|----------------------------------------|----------------------|-------------------|-------|-------|---|----------|
| <a href="#">DNA binding</a>            | <a href="#">1878</a> | <a href="#">1</a> | 16.87 | < 0.2 | - | 6.91E-05 |
| ↳ <a href="#">nucleic acid binding</a> | <a href="#">2915</a> | <a href="#">4</a> | 26.19 | < 0.2 | - | 3.75E-06 |

Now includes comprehensive GO annotations directly imported from the GO database

Analysis Summary: Please report in publication ?

Analysis Type: PANTHER Overrepresentation Test (release 20160321)

Annotation Version and Release Date: PANTHER version 10.0 Released 2015-05-15

Analized List: Client Text Box Input (Homo sapiens) 

Change

Reference List: Homo sapiens (all genes in database) 

Change

Annotation Data Set: 

PANTHER GO-Slim Biological Process

 BONE MARROW MSCs

☒ Use the Bonferroni correction for multiple testing ?

Results ?

|               |                       |                       |
|---------------|-----------------------|-----------------------|
|               | Reference list        | Client Text Box Input |
| Mapped IDs:   | <a href="#">20814</a> | <a href="#">361</a>   |
| Unmapped IDs: | <a href="#">0</a>     | <a href="#">5</a>     |

Export results

View: 

-- Please select a chart to display --

Displaying only results with P<0.05; [click here to display all results](#)

|                                                                  | <a href="#">Homo sapiens</a> (REF) | <a href="#">Client Text Box Input</a> ( <a href="#">▼ Hierarchy</a> <span>NEW!</span> ?) |                          |                                 |                     |                         |
|------------------------------------------------------------------|------------------------------------|------------------------------------------------------------------------------------------|--------------------------|---------------------------------|---------------------|-------------------------|
| <a href="#">PANTHER GO-Slim Biological Process</a>               | #                                  | #                                                                                        | <a href="#">expected</a> | <a href="#">Fold Enrichment</a> | <a href="#">+/-</a> | <a href="#">P value</a> |
| <a href="#">tricarboxylic acid cycle</a>                         | <a href="#">20</a>                 | <a href="#">5</a>                                                                        | .35                      | 14.41                           | +                   | 6.77E-03                |
| ↳ <a href="#">metabolic process</a>                              | <a href="#">8247</a>               | <a href="#">180</a>                                                                      | 143.04                   | 1.26                            | +                   | 1.13E-02                |
| <a href="#">glycolysis</a>                                       | <a href="#">25</a>                 | <a href="#">6</a>                                                                        | .43                      | 13.84                           | +                   | 1.36E-03                |
| ↳ <a href="#">monosaccharide metabolic process</a>               | <a href="#">143</a>                | <a href="#">11</a>                                                                       | 2.48                     | 4.44                            | +                   | 1.16E-02                |
| ↳ <a href="#">generation of precursor metabolites and energy</a> | <a href="#">274</a>                | <a href="#">16</a>                                                                       | 4.75                     | 3.37                            | +                   | 7.18E-03                |
| <a href="#">regulation of liquid surface tension</a>             | <a href="#">56</a>                 | <a href="#">13</a>                                                                       | .97                      | 13.38                           | +                   | 8.19E-09                |
| ↳ <a href="#">homeostatic process</a>                            | <a href="#">209</a>                | <a href="#">19</a>                                                                       | 3.62                     | 5.24                            | +                   | 1.82E-06                |
| <a href="#">protein folding</a>                                  | <a href="#">155</a>                | <a href="#">21</a>                                                                       | 2.69                     | 7.81                            | +                   | 2.22E-10                |
| ↳ <a href="#">protein metabolic process</a>                      | <a href="#">2692</a>               | <a href="#">103</a>                                                                      | 46.69                    | 2.21                            | +                   | 8.66E-13                |
| <a href="#">cellular component morphogenesis</a>                 | <a href="#">478</a>                | <a href="#">50</a>                                                                       | 8.29                     | 6.03                            | +                   | 1.49E-21                |
| ↳ <a href="#">anatomical structure morphogenesis</a>             | <a href="#">596</a>                | <a href="#">55</a>                                                                       | 10.34                    | 5.32                            | +                   | 2.31E-21                |
| ↳ <a href="#">developmental process</a>                          | <a href="#">2456</a>               | <a href="#">105</a>                                                                      | 42.60                    | 2.46                            | +                   | 1.95E-16                |
| ↳ <a href="#">cellular component organization</a>                | <a href="#">1206</a>               | <a href="#">64</a>                                                                       | 20.92                    | 3.06                            | +                   | 4.12E-13                |
| ↳ <a href="#">cellular component organization or biogenesis</a>  | <a href="#">1316</a>               | <a href="#">71</a>                                                                       | 22.82                    | 3.11                            | +                   | 3.69E-15                |
| <a href="#">cell-matrix adhesion</a>                             | <a href="#">89</a>                 | <a href="#">9</a>                                                                        | 1.54                     | 5.83                            | +                   | 7.12E-03                |
| ↳ <a href="#">cell adhesion</a>                                  | <a href="#">579</a>                | <a href="#">37</a>                                                                       | 10.04                    | 3.68                            | +                   | 3.93E-09                |
| ↳ <a href="#">biological adhesion</a>                            | <a href="#">606</a>                | <a href="#">41</a>                                                                       | 10.51                    | 3.90                            | +                   | 4.86E-11                |
| <a href="#">protein complex assembly</a>                         | <a href="#">107</a>                | <a href="#">10</a>                                                                       | 1.86                     | 5.39                            | +                   | 5.09E-03                |
| ↳ <a href="#">protein complex biogenesis</a>                     | <a href="#">108</a>                | <a href="#">10</a>                                                                       | 1.87                     | 5.34                            | +                   | 5.50E-03                |
|                                                                  |                                    |                                                                                          |                          |                                 |                     |                         |

|                                                                                  |                      |                     |        |      |   |          |
|----------------------------------------------------------------------------------|----------------------|---------------------|--------|------|---|----------|
| <a href="#">cell-cell adhesion</a>                                               | <a href="#">391</a>  | <a href="#">33</a>  | 6.78   | 4.87 | + | 3.72E-11 |
| <a href="#">macrophage activation</a>                                            | <a href="#">167</a>  | <a href="#">14</a>  | 2.90   | 4.83 | + | 4.30E-04 |
| ↳ <a href="#">immune system process</a>                                          | <a href="#">1391</a> | <a href="#">50</a>  | 24.13  | 2.07 | + | 2.19E-04 |
| <a href="#">receptor-mediated endocytosis</a>                                    | <a href="#">205</a>  | <a href="#">16</a>  | 3.56   | 4.50 | + | 2.02E-04 |
| ↳ <a href="#">endocytosis</a>                                                    | <a href="#">373</a>  | <a href="#">25</a>  | 6.47   | 3.86 | + | 3.41E-06 |
| <a href="#">regulation of translation</a>                                        | <a href="#">148</a>  | <a href="#">11</a>  | 2.57   | 4.29 | + | 1.57E-02 |
| <a href="#">muscle contraction</a>                                               | <a href="#">217</a>  | <a href="#">14</a>  | 3.76   | 3.72 | + | 7.78E-03 |
| ↳ <a href="#">system process</a>                                                 | <a href="#">1296</a> | <a href="#">48</a>  | 22.48  | 2.14 | + | 1.62E-04 |
| ↳ <a href="#">single-multicellular organism process</a>                          | <a href="#">1636</a> | <a href="#">52</a>  | 28.37  | 1.83 | + | 4.15E-03 |
| ↳ <a href="#">multicellular organismal process</a>                               | <a href="#">1640</a> | <a href="#">52</a>  | 28.44  | 1.83 | + | 4.43E-03 |
| <a href="#">proteolysis</a>                                                      | <a href="#">719</a>  | <a href="#">36</a>  | 12.47  | 2.89 | + | 4.37E-06 |
| <a href="#">mesoderm development</a>                                             | <a href="#">671</a>  | <a href="#">31</a>  | 11.64  | 2.66 | + | 2.39E-04 |
| <a href="#">response to stimulus</a>                                             | <a href="#">2170</a> | <a href="#">65</a>  | 37.64  | 1.73 | + | 2.16E-03 |
| <a href="#">cellular process</a>                                                 | <a href="#">6708</a> | <a href="#">188</a> | 116.34 | 1.62 | + | 1.17E-12 |
| Unclassified                                                                     | <a href="#">8629</a> | <a href="#">61</a>  | 149.66 | .41  | - | 0.00E00  |
| <a href="#">regulation of transcription from RNA polymerase II promoter</a>      | <a href="#">1319</a> | <a href="#">7</a>   | 22.88  | .31  | - | 1.61E-02 |
| ↳ <a href="#">transcription from RNA polymerase II promoter</a>                  | <a href="#">1723</a> | <a href="#">10</a>  | 29.88  | .33  | - | 2.94E-03 |
| ↳ <a href="#">transcription, DNA-dependent</a>                                   | <a href="#">1941</a> | <a href="#">10</a>  | 33.66  | .30  | - | 1.64E-04 |
| ↳ <a href="#">RNA metabolic process</a>                                          | <a href="#">2360</a> | <a href="#">17</a>  | 40.93  | .42  | - | 1.80E-03 |
| ↳ <a href="#">regulation of nucleobase-containing compound metabolic process</a> | <a href="#">1700</a> | <a href="#">8</a>   | 29.48  | .27  | - | 3.32E-04 |

Now includes comprehensive GO annotations directly imported from the GO database

Analysis Summary: Please report in publication ?

Analysis Type: PANTHER Overrepresentation Test (release 20160321)

Annotation Version and Release Date: PANTHER version 10.0 Released 2015-05-15

Analyzed List: Client Text Box Input (Homo sapiens) 

Change

Reference List: Homo sapiens (all genes in database) 

Change

Annotation Data Set: 

PANTHER GO-Slim Molecular Function

 BONE MARROW MSCs

☒ Use the Bonferroni correction for multiple testing ?

Results ?

|               |                       |                       |
|---------------|-----------------------|-----------------------|
|               | Reference list        | Client Text Box Input |
| Mapped IDs:   | <a href="#">20814</a> | <a href="#">361</a>   |
| Unmapped IDs: | <a href="#">0</a>     | <a href="#">5</a>     |

Export results

View: 

-- Please select a chart to display --

Displaying only results with P<0.05; [click here to display all results](#)

|                                                                                         | <a href="#">Homo sapiens</a> (REF) | <a href="#">Client Text Box Input</a> ( <div><div></div><div>Hierarchy</div></div> <b>NEW!</b> ?) |                          |                                 |                     |                         |
|-----------------------------------------------------------------------------------------|------------------------------------|---------------------------------------------------------------------------------------------------|--------------------------|---------------------------------|---------------------|-------------------------|
| <a href="#">PANTHER GO-Slim Molecular Function</a>                                      | #                                  | #                                                                                                 | <a href="#">expected</a> | <a href="#">Fold Enrichment</a> | <a href="#">+/-</a> | <a href="#">P value</a> |
| <a href="#">peroxidase activity</a>                                                     | <a href="#">27</a>                 | <a href="#">6</a>                                                                                 | .47                      | 12.81                           | +                   | 1.60E-03                |
| <div><div></div><a href="#">antioxidant activity</a></div>                              | <a href="#">30</a>                 | <a href="#">6</a>                                                                                 | .52                      | 11.53                           | +                   | 2.89E-03                |
| <a href="#">extracellular matrix structural constituent</a>                             | <a href="#">76</a>                 | <a href="#">16</a>                                                                                | 1.32                     | 12.14                           | +                   | 1.46E-10                |
| <div><div></div><a href="#">structural molecule activity</a></div>                      | <a href="#">1034</a>               | <a href="#">80</a>                                                                                | 17.93                    | 4.46                            | +                   | 2.62E-27                |
| <a href="#">actin binding</a>                                                           | <a href="#">176</a>                | <a href="#">27</a>                                                                                | 3.05                     | 8.85                            | +                   | 4.55E-15                |
| <div><div></div><a href="#">cytoskeletal protein binding</a></div>                      | <a href="#">251</a>                | <a href="#">29</a>                                                                                | 4.35                     | 6.66                            | +                   | 4.16E-13                |
| <div><div></div><a href="#">protein binding</a></div>                                   | <a href="#">2819</a>               | <a href="#">100</a>                                                                               | 48.89                    | 2.05                            | +                   | 2.07E-10                |
| <a href="#">translation elongation factor activity</a>                                  | <a href="#">46</a>                 | <a href="#">6</a>                                                                                 | .80                      | 7.52                            | +                   | 2.98E-02                |
| <div><div></div><a href="#">translation factor activity, nucleic acid binding</a></div> | <a href="#">136</a>                | <a href="#">11</a>                                                                                | 2.36                     | 4.66                            | +                   | 5.67E-03                |
| <div><div></div><a href="#">translation regulator activity</a></div>                    | <a href="#">128</a>                | <a href="#">10</a>                                                                                | 2.22                     | 4.50                            | +                   | 1.70E-02                |
| <a href="#">isomerase activity</a>                                                      | <a href="#">166</a>                | <a href="#">18</a>                                                                                | 2.88                     | 6.25                            | +                   | 2.38E-07                |
| <div><div></div><a href="#">catalytic activity</a></div>                                | <a href="#">5209</a>               | <a href="#">127</a>                                                                               | 90.35                    | 1.41                            | +                   | 1.88E-03                |
| <a href="#">structural constituent of cytoskeleton</a>                                  | <a href="#">663</a>                | <a href="#">55</a>                                                                                | 11.50                    | 4.78                            | +                   | 2.29E-19                |
| <a href="#">metallopeptidase activity</a>                                               | <a href="#">170</a>                | <a href="#">13</a>                                                                                | 2.95                     | 4.41                            | +                   | 2.00E-03                |
| <div><div></div><a href="#">peptidase activity</a></div>                                | <a href="#">630</a>                | <a href="#">38</a>                                                                                | 10.93                    | 3.48                            | +                   | 8.17E-09                |
| <div><div></div><a href="#">hydrolase activity</a></div>                                | <a href="#">2205</a>               | <a href="#">62</a>                                                                                | 38.24                    | 1.62                            | +                   | 1.73E-02                |

|                                                                             |                       |                     |        |      |   |          |
|-----------------------------------------------------------------------------|-----------------------|---------------------|--------|------|---|----------|
| <a href="#">serine-type peptidase activity</a>                              | <a href="#">322</a>   | <a href="#">22</a>  | 5.58   | 3.94 | + | 1.40E-05 |
| <a href="#">peptidase inhibitor activity</a>                                | <a href="#">226</a>   | <a href="#">15</a>  | 3.92   | 3.83 | + | 2.28E-03 |
| <a href="#">oxidoreductase activity</a>                                     | <a href="#">626</a>   | <a href="#">40</a>  | 10.86  | 3.68 | + | 4.30E-10 |
| <a href="#">receptor binding</a>                                            | <a href="#">980</a>   | <a href="#">34</a>  | 17.00  | 2.00 | + | 2.02E-02 |
| Unclassified                                                                | <a href="#">10020</a> | <a href="#">100</a> | 173.79 | .58  | - | 0.00E00  |
| <a href="#">sequence-specific DNA binding transcription factor activity</a> | <a href="#">1462</a>  | <a href="#">7</a>   | 25.36  | .28  | - | 1.80E-03 |
| ↳ <a href="#">nucleic acid binding transcription factor activity</a>        | <a href="#">1646</a>  | <a href="#">7</a>   | 28.55  | .25  | - | 1.35E-04 |
| ↳ <a href="#">DNA binding</a>                                               | <a href="#">1878</a>  | <a href="#">9</a>   | 32.57  | .28  | - | 8.09E-05 |

Now includes comprehensive GO annotations directly imported from the GO database

Analysis Summary: Please report in publication ?

Analysis Type: PANTHER Overrepresentation Test (release 20160321)

Annotation Version and Release Date: PANTHER version 10.0 Released 2015-05-15

Analyzed List:

Client Text Box Input (Homo sapiens)

Change

Reference List:

Homo sapiens (all genes in database)

Change

Annotation Data Set:

PANTHER GO-Slim Biological Process

ADIPOSE MSCs

☒ Use the Bonferroni correction for multiple testing ?

Results ?

|               |                       |                       |
|---------------|-----------------------|-----------------------|
|               | Reference list        | Client Text Box Input |
| Mapped IDs:   | <a href="#">20814</a> | <a href="#">247</a>   |
| Unmapped IDs: | <a href="#">0</a>     | <a href="#">2</a>     |

Export results

View: -- Please select a chart to display --

Displaying only results with P<0.05; [click here to display all results](#)

|                                                                  | <a href="#">Homo sapiens</a> (REF) | <a href="#">Client Text Box Input</a> ( <a href="#">▼ Hierarchy</a> <span>NEW!</span> ?) |                          |                                 |                     |                         |
|------------------------------------------------------------------|------------------------------------|------------------------------------------------------------------------------------------|--------------------------|---------------------------------|---------------------|-------------------------|
| <a href="#">PANTHER GO-Slim Biological Process</a>               | #                                  | #                                                                                        | <a href="#">expected</a> | <a href="#">Fold Enrichment</a> | <a href="#">+/-</a> | <a href="#">P value</a> |
| <a href="#">tricarboxylic acid cycle</a>                         | <a href="#">20</a>                 | <a href="#">5</a>                                                                        | .24                      | 21.07                           | +                   | 1.10E-03                |
| ↳ <a href="#">primary metabolic process</a>                      | <a href="#">6825</a>               | <a href="#">108</a>                                                                      | 80.99                    | 1.33                            | +                   | 4.79E-02                |
| ↳ <a href="#">metabolic process</a>                              | <a href="#">8247</a>               | <a href="#">127</a>                                                                      | 97.87                    | 1.30                            | +                   | 2.54E-02                |
| <a href="#">glycolysis</a>                                       | <a href="#">25</a>                 | <a href="#">6</a>                                                                        | .30                      | 20.22                           | +                   | 1.54E-04                |
| ↳ <a href="#">monosaccharide metabolic process</a>               | <a href="#">143</a>                | <a href="#">10</a>                                                                       | 1.70                     | 5.89                            | +                   | 2.29E-03                |
| ↳ <a href="#">carbohydrate metabolic process</a>                 | <a href="#">573</a>                | <a href="#">21</a>                                                                       | 6.80                     | 3.09                            | +                   | 1.40E-03                |
| ↳ <a href="#">generation of precursor metabolites and energy</a> | <a href="#">274</a>                | <a href="#">14</a>                                                                       | 3.25                     | 4.31                            | +                   | 1.47E-03                |
| <a href="#">regulation of liquid surface tension</a>             | <a href="#">56</a>                 | <a href="#">8</a>                                                                        | .66                      | 12.04                           | +                   | 1.05E-04                |
| ↳ <a href="#">homeostatic process</a>                            | <a href="#">209</a>                | <a href="#">14</a>                                                                       | 2.48                     | 5.64                            | +                   | 6.55E-05                |
| <a href="#">protein folding</a>                                  | <a href="#">155</a>                | <a href="#">22</a>                                                                       | 1.84                     | 11.96                           | +                   | 1.00E-14                |
| ↳ <a href="#">protein metabolic process</a>                      | <a href="#">2692</a>               | <a href="#">73</a>                                                                       | 31.95                    | 2.29                            | +                   | 1.21E-09                |
| <a href="#">cell-matrix adhesion</a>                             | <a href="#">89</a>                 | <a href="#">9</a>                                                                        | 1.06                     | 8.52                            | +                   | 3.45E-04                |
| ↳ <a href="#">cell adhesion</a>                                  | <a href="#">579</a>                | <a href="#">30</a>                                                                       | 6.87                     | 4.37                            | +                   | 4.69E-09                |
| ↳ <a href="#">biological adhesion</a>                            | <a href="#">606</a>                | <a href="#">32</a>                                                                       | 7.19                     | 4.45                            | +                   | 5.82E-10                |
| <a href="#">protein complex assembly</a>                         | <a href="#">107</a>                | <a href="#">9</a>                                                                        | 1.27                     | 7.09                            | +                   | 1.51E-03                |
| ↳ <a href="#">protein complex biogenesis</a>                     | <a href="#">108</a>                | <a href="#">9</a>                                                                        | 1.28                     | 7.02                            | +                   | 1.62E-03                |
| ↳ <a href="#">cellular component organization or biogenesis</a>  | <a href="#">1316</a>               | <a href="#">47</a>                                                                       | 15.62                    | 3.01                            | +                   | 2.93E-09                |
| <a href="#">cell-cell adhesion</a>                               | <a href="#">391</a>                | <a href="#">27</a>                                                                       | 4.64                     | 5.82                            | +                   | 8.34E-11                |
| <a href="#">cellular component morphogenesis</a>                 | <a href="#">478</a>                | <a href="#">29</a>                                                                       | 5.67                     | 5.11                            | +                   | 2.48E-10                |
|                                                                  |                                    |                                                                                          |                          |                                 |                     |                         |

|                                                                 |      |     |        |       |   |          |
|-----------------------------------------------------------------|------|-----|--------|-------|---|----------|
| ↳anatomical structure morphogenesis                             | 596  | 35  | 7.07   | 4.95  | + | 2.37E-12 |
| ↳developmental process                                          | 2456 | 69  | 29.15  | 2.37  | + | 1.17E-09 |
| ↳cellular component organization                                | 1206 | 39  | 14.31  | 2.73  | + | 3.19E-06 |
| blood coagulation                                               | 168  | 9   | 1.99   | 4.51  | + | 4.69E-02 |
| ↳response to stimulus                                           | 2170 | 46  | 25.75  | 1.79  | + | 1.72E-02 |
| endocytosis                                                     | 373  | 15  | 4.43   | 3.39  | + | 1.09E-02 |
| proteolysis                                                     | 719  | 25  | 8.53   | 2.93  | + | 4.47E-04 |
| mesoderm development                                            | 671  | 20  | 7.96   | 2.51  | + | 3.92E-02 |
| immune system process                                           | 1391 | 39  | 16.51  | 2.36  | + | 1.25E-04 |
| system process                                                  | 1296 | 32  | 15.38  | 2.08  | + | 1.70E-02 |
| cell communication                                              | 3006 | 61  | 35.67  | 1.71  | + | 3.24E-03 |
| ↳cellular process                                               | 6708 | 127 | 79.60  | 1.60  | + | 7.68E-08 |
| Unclassified                                                    | 8629 | 43  | 102.40 | .42   | - | 0.00E00  |
| regulation of transcription from RNA polymerase II promoter     | 1319 | 2   | 15.65  | < 0.2 | - | 3.29E-03 |
| ↳transcription from RNA polymerase II promoter                  | 1723 | 4   | 20.45  | < 0.2 | - | 1.44E-03 |
| ↳transcription, DNA-dependent                                   | 1941 | 4   | 23.03  | < 0.2 | - | 1.39E-04 |
| ↳RNA metabolic process                                          | 2360 | 7   | 28.01  | .25   | - | 1.99E-04 |
| ↳nucleobase-containing compound metabolic process               | 3467 | 18  | 41.14  | .44   | - | 2.54E-03 |
| ↳regulation of nucleobase-containing compound metabolic process | 1700 | 3   | 20.17  | < 0.2 | - | 3.22E-04 |

Now includes comprehensive GO annotations directly imported from the GO database

Analysis Summary: Please report in publication ?

Analysis Type: PANTHER Overrepresentation Test (release 20160321)

Annotation Version and Release Date: PANTHER version 10.0 Released 2015-05-15

Analyzed List:

Client Text Box Input (Homo sapiens)

Change

Reference List:

Homo sapiens (all genes in database)

Change

Annotation Data Set:

PANTHER GO-Slim Molecular Function

ADIPOSE MSCs

☒ Use the Bonferroni correction for multiple testing ?

Results ?

|               |                       |                       |
|---------------|-----------------------|-----------------------|
|               | Reference list        | Client Text Box Input |
| Mapped IDs:   | <a href="#">20814</a> | <a href="#">247</a>   |
| Unmapped IDs: | <a href="#">0</a>     | <a href="#">2</a>     |

Export results

View: -- Please select a chart to display --

Displaying only results with P<0.05; [click here to display all results](#)

|                                                             | <a href="#">Homo sapiens</a> (REF) | <a href="#">Client Text Box Input</a> (▼ <a href="#">Hierarchy</a> <b>NEW!</b> ?) |                          |                                 |                     |                         |
|-------------------------------------------------------------|------------------------------------|-----------------------------------------------------------------------------------|--------------------------|---------------------------------|---------------------|-------------------------|
| <a href="#">PANTHER GO-Slim Molecular Function</a>          | #                                  | #                                                                                 | <a href="#">expected</a> | <a href="#">Fold Enrichment</a> | <a href="#">+/-</a> | <a href="#">P value</a> |
| <a href="#">peroxidase activity</a>                         | <a href="#">27</a>                 | <a href="#">5</a>                                                                 | .32                      | 15.61                           | +                   | 3.52E-03                |
| ↳ <a href="#">antioxidant activity</a>                      | <a href="#">30</a>                 | <a href="#">6</a>                                                                 | .36                      | 16.85                           | +                   | 3.34E-04                |
| <a href="#">extracellular matrix structural constituent</a> | <a href="#">76</a>                 | <a href="#">13</a>                                                                | .90                      | 14.41                           | +                   | 2.33E-09                |
| ↳ <a href="#">structural molecule activity</a>              | <a href="#">1034</a>               | <a href="#">53</a>                                                                | 12.27                    | 4.32                            | +                   | 3.08E-17                |
| <a href="#">translation elongation factor activity</a>      | <a href="#">46</a>                 | <a href="#">5</a>                                                                 | .55                      | 9.16                            | +                   | 4.21E-02                |
| <a href="#">metallopeptidase activity</a>                   | <a href="#">170</a>                | <a href="#">13</a>                                                                | 2.02                     | 6.44                            | +                   | 3.07E-05                |
| ↳ <a href="#">peptidase activity</a>                        | <a href="#">630</a>                | <a href="#">29</a>                                                                | 7.48                     | 3.88                            | +                   | 1.19E-07                |
| ↳ <a href="#">catalytic activity</a>                        | <a href="#">5209</a>               | <a href="#">90</a>                                                                | 61.82                    | 1.46                            | +                   | 7.67E-03                |
| <a href="#">isomerase activity</a>                          | <a href="#">166</a>                | <a href="#">12</a>                                                                | 1.97                     | 6.09                            | +                   | 1.63E-04                |
| <a href="#">lipid transporter activity</a>                  | <a href="#">112</a>                | <a href="#">8</a>                                                                 | 1.33                     | 6.02                            | +                   | 1.17E-02                |
| <a href="#">actin binding</a>                               | <a href="#">176</a>                | <a href="#">12</a>                                                                | 2.09                     | 5.75                            | +                   | 2.97E-04                |
| ↳ <a href="#">cytoskeletal protein binding</a>              | <a href="#">251</a>                | <a href="#">12</a>                                                                | 2.98                     | 4.03                            | +                   | 9.67E-03                |
| ↳ <a href="#">protein binding</a>                           | <a href="#">2819</a>               | <a href="#">66</a>                                                                | 33.45                    | 1.97                            | +                   | 5.52E-06                |
| <a href="#">peptidase inhibitor activity</a>                | <a href="#">226</a>                | <a href="#">14</a>                                                                | 2.68                     | 5.22                            | +                   | 1.25E-04                |
| ↳ <a href="#">enzyme inhibitor activity</a>                 | <a href="#">362</a>                | <a href="#">14</a>                                                                | 4.30                     | 3.26                            | +                   | 2.23E-02                |
| <a href="#">serine-type peptidase activity</a>              | <a href="#">322</a>                | <a href="#">18</a>                                                                | 3.82                     | 4.71                            | +                   | 1.46E-05                |

|                                                                             |                       |                    |        |       |   |          |
|-----------------------------------------------------------------------------|-----------------------|--------------------|--------|-------|---|----------|
| <a href="#">structural constituent of cytoskeleton</a>                      | <a href="#">663</a>   | <a href="#">34</a> | 7.87   | 4.32  | + | 1.92E-10 |
| <a href="#">oxidoreductase activity</a>                                     | <a href="#">626</a>   | <a href="#">31</a> | 7.43   | 4.17  | + | 4.94E-09 |
| <a href="#">calmodulin binding</a>                                          | <a href="#">282</a>   | <a href="#">12</a> | 3.35   | 3.59  | + | 2.84E-02 |
| <a href="#">calcium ion binding</a>                                         | <a href="#">449</a>   | <a href="#">17</a> | 5.33   | 3.19  | + | 5.57E-03 |
| <a href="#">receptor binding</a>                                            | <a href="#">980</a>   | <a href="#">26</a> | 11.63  | 2.24  | + | 2.11E-02 |
| Unclassified                                                                | <a href="#">10020</a> | <a href="#">67</a> | 118.91 | .56   | - | 0.00E00  |
| <a href="#">sequence-specific DNA binding transcription factor activity</a> | <a href="#">1462</a>  | <a href="#">2</a>  | 17.35  | < 0.2 | - | 5.02E-04 |
| ↳ <a href="#">nucleic acid binding transcription factor activity</a>        | <a href="#">1646</a>  | <a href="#">2</a>  | 19.53  | < 0.2 | - | 6.05E-05 |
| ↳ <a href="#">DNA binding</a>                                               | <a href="#">1878</a>  | <a href="#">5</a>  | 22.29  | .22   | - | 1.07E-03 |
