# Supplementary material
Source: publisher figshare collection journal article supplement (https://tandf.figshare.com/articles/dataset/_/3503471)
Supplement: Supplementary file 3 [file 1 › 2016CC7185R-s04.pdf]

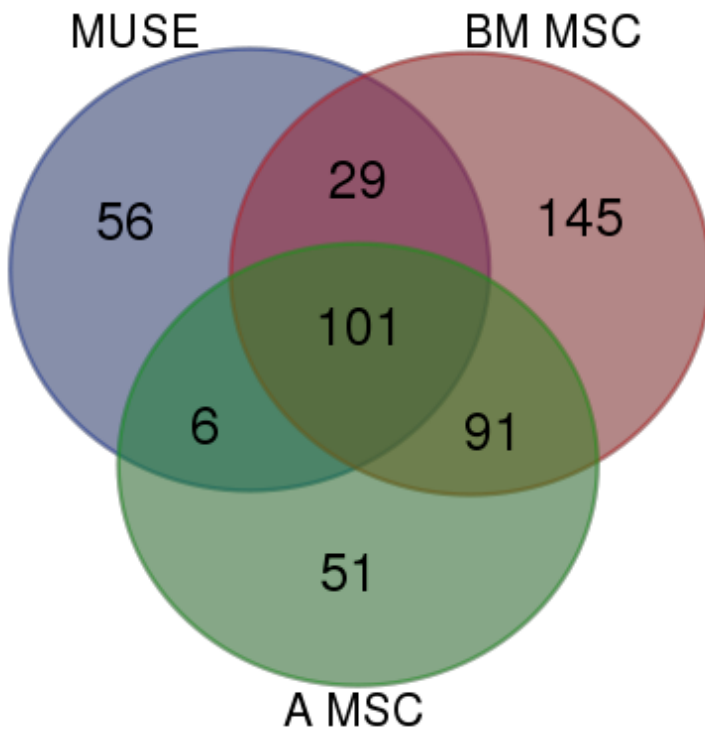

**101 SECRETED PROTEINS PRESENT IN MUSE CELLS, BM MSC AND A MSC**

FSTL1  
 ACTN4  
 MMP2  
 ANXA2  
 ENO1  
 TAGLN  
 VCL  
 TKT  
 COL3A1  
 SERPINE1  
 COL4A2  
 LUM  
 ANXA6  
 ANXA1  
 CLSTN1  
 KRT9  
 COL6A2  
 PGAM1  
 YWHAG  
 MSN  
 PSMB2  
 PCOLCE  
 VIM  
 SERPINF1  
 LGALS3BP  
 LDHA  
 SERPINE2  
 QSOX1  
 MFGE8  
 A2M

KRT1  
COL6A3  
LAMB1  
ISLR  
COL1A1  
PDIA3  
POSTN  
KRT10  
AHSG  
TALDO1  
TAGLN2  
PFN1  
MDH1  
KRT5  
TIMP2  
NT5E  
P4HB  
TPI1  
COL6A1  
SEMA7A  
C3  
IGFBP6  
SPARC  
IGFBP3  
CLEC11A  
COL5A1  
HSPA5  
ALB  
CFL1  
LAMA4  
PIIB  
SERPINC1  
YWHAQ  
LMNA  
PIIA  
PSMB6  
ACTN1  
PTX3  
GAPDH  
PDIA4  
COMP  
NUCB1  
THBS1  
LDHB  
NME1-NME2  
TGFB1  
TIMP1  
ACTG1  
IGFBP7  
PRDX1  
PRDX4  
BGN  
ALDOA  
HSPG2  
HSP90B1  
PSMB5  
CST3  
COL1A2  
ARPC4-TTLL3  
PSMA5  
HSPA8

LAMC1  
ANXA5  
GDI2  
VASN  
FN1  
PRDX2  
YWHAB  
YWHAZ  
KRT2

## **29 SECRETED PROTEINS PRESENT IN MUSE CELLS AND BM MSC**

PSMA2  
KRT14  
CYCS  
CTSB  
PSMA3  
TPM1  
YWHAE  
KRT6B  
PSMB1  
TXN  
PSMA6  
SERPING1  
CTSD  
C4A/C4B  
APEX1  
PSMA7  
ITIH2  
PSMB4  
NME1  
MYDGF  
FLNA  
PEBP1  
CHI3L1  
S100A11  
COL12A1  
AFP  
HBB  
PNP  
DCD

## **6 SECRETED PROTEINS PRESENT IN MUSE CELLS AND A MSC**

CALU  
RCN1  
KRT16  
SERPINA5  
NID2  
RPSA

## 91 SECRETED PROTEINS PRESENT IN BM MSC AND A MSC

HSPB1  
CCT4  
C1S  
RDX  
TLN1  
EEF2  
MAN1A1  
PRDX3  
NID1  
FBLN1  
H2AFJ  
GANAB  
LOX  
PCBP1  
LAMB2  
OAF  
PDIA6  
TCP1  
MMP3  
CNDP2  
DPYSL2  
SERPINH1  
FKBP10  
COL5A2  
PKM  
NRP1  
UBA1  
TPM4  
OLFML3  
EXT2  
INHBA  
MXRA8  
LOXL2  
HNRNPA2B1  
SDF4  
MYL12A  
EIF4A1  
FSCN1  
ABI3BP  
APOE  
ACLY  
HSPD1  
RPL12  
DCN  
CCDC80  
IGFBP4  
KPNB1  
CLU  
CCT2  
EMILIN1  
PXDN  
MYH9  
ATP5B  
MDH2  
NPM1  
TGFB1  
CCT8

B4GALT1  
HMCN1  
LTBP1  
AEBP1  
PLS3  
FBN1  
BMP1  
THBS2  
PLEC  
EZR  
PGD  
HSP90AB1  
VCP  
FLNC  
LASP1  
ARPC1B  
HNRNPA1  
PAPPA  
CLIC1  
MMP1  
CLTC  
HTRA1  
ECM1  
EEF1G  
EEF1A1  
GARS  
CD109  
TP53I3  
SRPX  
HSP90AA1  
EFEMP1  
ACTR2  
PGK1  
PLOD1

## **56 SECRETED PROTEINS PRESENT IN MUSE CELLS**

PSMA4  
GOT2  
KRT19  
CSTA  
PRKCSH  
LCN1  
JUP  
SERPINB8  
RPLP0  
AKAP13  
DSP  
KRT77  
KRT80  
CAT  
CALR  
TTR  
LYZ  
GM2A  
CASP14  
GSS  
B2M  
ARG1

KRT4  
IGKC  
GNAS  
KRT13  
HIST3H3  
TGM3  
CALM1 (includes others)  
PGLS  
PSAT1  
GSDMA  
ITIH3  
SERPINB6  
CTSZ  
AZGP1  
DSC1  
DSG1  
COL2A1  
APOD  
GPI  
SERPINB3  
APOB  
S100A8  
HIST1H2BL  
LTF  
SERPINB12  
KRT78  
RPL18  
PZP  
LGALS7/LGALS7B  
KRT6A  
IGHG1  
KRT17  
KRT32  
S100A9

## **145 SECRETED PROTEINS PRESENT IN BM MSC**

RAB2A  
MAGOH  
AK1  
DTD1  
ACTR3  
ARPC5  
ATP6AP2  
ARPC2  
COL4A1  
ISOC1  
VCAN  
MANF  
CNN2  
RAC1  
YWHAH  
CSRP1  
RBMX  
EDIL3  
COTL1  
MYL9  
ACP1  
MARCKS  
HARS

PARK7  
VEGFC  
CHID1  
CAPZA1  
ERP29  
PGM1  
GLRX3  
WARS  
PRG4  
RBM8A  
CPNE1  
PRDX6  
GSTO1  
ILF2  
EIF2S1  
PSMA1  
PDLIM7  
CORO1C  
RPS20  
CAPG  
CLIC4  
PPIC  
RPL11  
HIBCH  
UCHL1  
UBE2D3  
EIF5A  
COPE  
SSC5D  
BLVRA  
TBCA  
P3H1  
HNRNPK  
GBE1  
CDC42  
ACTA1  
VTN  
CTSA  
CAPZA2  
LGALS1  
FLNB  
UBE2V1  
STC2  
CALD1  
PSMD2  
DSTN  
WDR1  
DDX39B  
EDF1  
NACA  
TPM3  
RAB10  
NEO1  
LGALS3  
CFL2  
RPS28  
KCTD12  
IQGAP1  
UBE2V2  
THBS3  
CMPK1

CPA4  
FNDC1  
RBM3  
COL11A1  
CEMIP  
RPS12  
TWF1  
ARF4  
CXCL12  
AKR1A1  
PPP2R1A  
CTHRC1  
G6PD  
PSME2  
HNRNPAB  
SYNCRIP  
GALNT5  
GNB2L1  
GAS6  
PENK  
MAPRE1  
CFH  
PGM3  
BTF3  
TXNDC17  
PLOD2  
CDH2  
PPP1CB  
PAFAH1B2  
HSPE1  
GNG12  
BAX  
COL7A1  
ABHD14B  
CNN3  
FKBP1A  
PIN4  
ADAMTS2  
ARPC3  
IGFBP5  
COL8A1  
GSTP1  
CTGF  
CAPZB  
PTBP1  
DPYSL3  
SNX3  
COLEC12  
STMN1  
ANGPT1  
PDLIM5  
PSME1  
CAB39  
RSU1  
TMED10  
RPS21  
S100A10  
RAB7A  
LOXL1  
CBR1  
SNRPD2

## 51 SECRETED PROTEINS PRESENT IN A MSC

SEC23A  
LTBP2  
RPS18  
LAMA2  
RNH1  
EXT1  
CD248  
TUBA1A  
ARHGDIA  
GNAI2  
UGDH  
NUCB2  
TUBB4B  
FBN2  
PSG5  
HK1  
EEF1D  
HEXB  
SEPT11  
SRI  
APOH  
SOD3  
TXNDC5  
SRSF1  
XRCC6  
TUBB3  
ENPP2  
C1QTNF5  
FBLN2  
VAT1  
UBA52  
ERO1A  
SPTBN1  
SND1  
PCOLCE2  
RPS14  
PLOD3  
HEXA  
SLC3A2  
ADAMTSL1  
SPTAN1  
HIST1H2AC  
CCT6A  
ANPEP  
PSG4  
GPC1  
APP  
MVP  
SPON2  
SPOCK1  
CCT7
