# Supplementary material
Source: publisher figshare collection journal article supplement (https://tandf.figshare.com/articles/dataset/_/3503471)
Supplement: Supplementary file 3 [file 1 › 2016CC7185R-s07.xls]

## Sheet: MUSE
© 2000-2016 QIAGEN. All rights reserved.
Ingenuity Canonical Pathways	-log(p-value)	Ratio	z-score	Molecules
Hepatic Fibrosis / Hepatic Stellate Cell Activation	1,18E01	9,29E-02	NaN	MMP2,COL6A3,COL6A1,COL3A1,COL1A2,COL1A1,COL6A2,COL5A1,TIMP2,A2M,COL12A1,FN1,COL4A2,COL2A1,IGFBP3,TIMP1,SERPINE1
Protein Ubiquitination Pathway	7,75E00	5,88E-02	NaN	PSMB6,PSMA4,HSP90B1,PSMA6,PSMA3,B2M,PSMB5,PSMB1,PSMA7,PSMB4,HSPA8,HSPA5,PSMA2,PSMB2,PSMA5
Acute Phase Response Signaling	7,19E00	7,1E-02	NaN	A2M,C4A/C4B,FN1,C3,SERPINF1,ITIH3,SERPINE1,AHSG,SERPING1,ITIH2,ALB,TTR
Glycolysis I	7,03E00	2,4E-01	NaN	TPI1,PGAM1,GAPDH,ALDOA,ENO1,GPI
Gluconeogenesis I	7,03E00	2,4E-01	NaN	PGAM1,GAPDH,ALDOA,ENO1,MDH1,GPI
LXR/RXR Activation	6,7E00	8,26E-02	NaN	LYZ,C4A/C4B,S100A8,APOB,C3,SERPINF1,APOD,AHSG,ALB,TTR
Atherosclerosis Signaling	5,61E00	7,26E-02	NaN	LYZ,S100A8,APOB,APOD,COL3A1,COL1A2,COL2A1,COL1A1,ALB
IGF-1 Signaling	5,46E00	8,25E-02	NaN	YWHAQ,YWHAG,IGFBP7,IGFBP3,YWHAE,YWHAZ,YWHAB,IGFBP6
Intrinsic Prothrombin Activation Pathway	5,18E00	1,72E-01	NaN	COL3A1,COL1A2,COL2A1,COL1A1,SERPINC1
Myc Mediated Apoptosis Signaling	4,79E00	1,03E-01	NaN	YWHAQ,YWHAG,CYCS,YWHAE,YWHAZ,YWHAB
Antigen Presentation Pathway	4,64E00	1,35E-01	NaN	CALR,PSMB6,PDIA3,B2M,PSMB5
FXR/RXR Activation	4,59E00	6,3E-02	NaN	C4A/C4B,APOB,C3,SERPINF1,APOD,AHSG,ALB,TTR
Inhibition of Matrix Metalloproteases	4,53E00	1,28E-01	NaN	A2M,MMP2,HSPG2,TIMP1,TIMP2
ILK Signaling	4,19E00	4,84E-02	NaN	VIM,FN1,CFL1,VCL,ACTG1,FLNA,DSP,ACTN1,ACTN4
Cell Cycle: G2/M DNA Damage Checkpoint Regulation	4,04E00	1,02E-01	NaN	YWHAQ,YWHAG,YWHAE,YWHAZ,YWHAB
14-3-3-mediated Signaling	3,94E00	5,98E-02	NaN	VIM,YWHAQ,YWHAG,PDIA3,YWHAE,YWHAZ,YWHAB
Pentose Phosphate Pathway	3,91E00	2,73E-01	NaN	TKT,PGLS,TALDO1
Unfolded protein response	3,84E00	9,26E-02	NaN	CALR,HSPA8,HSP90B1,HSPA5,P4HB
Actin Cytoskeleton Signaling	3,69E00	4,15E-02	NaN	FN1,CFL1,PFN1,VCL,ACTG1,FLNA,MSN,ACTN1,ACTN4
Protein Kinase A Signaling	3,55E00	3,11E-02	NaN	HIST3H3,YWHAQ,AKAP13,GNAS,CALM1 (includes others),YWHAG,FLNA,PDIA3,YWHAE,YWHAZ,APEX1,YWHAB
ERK5 Signaling	3,52E00	7,94E-02	NaN	YWHAQ,YWHAG,YWHAE,YWHAZ,YWHAB
Coagulation System	3,52E00	1,14E-01	NaN	A2M,SERPINA5,SERPINE1,SERPINC1
Remodeling of Epithelial Adherens Junctions	3,37E00	7,35E-02	NaN	VCL,ACTG1,ACTN1,ACTN4,NME1
Leukocyte Extravasation Signaling	3,26E00	4,04E-02	NaN	MMP2,VCL,ACTG1,MSN,TIMP1,ACTN1,ACTN4,TIMP2
Germ Cell-Sertoli Cell Junction Signaling	3,12E00	4,37E-02	NaN	A2M,CFL1,VCL,ACTG1,JUP,ACTN1,ACTN4
p70S6K Signaling	3,06E00	5,04E-02	NaN	YWHAQ,YWHAG,PDIA3,YWHAE,YWHAZ,YWHAB
Endoplasmic Reticulum Stress Pathway	3,03E00	1,43E-01	NaN	CALR,HSP90B1,HSPA5
PI3K/AKT Signaling	2,98E00	4,88E-02	NaN	YWHAQ,YWHAG,HSP90B1,YWHAE,YWHAZ,YWHAB
HIPPO signaling	2,9E00	5,81E-02	NaN	YWHAQ,YWHAG,YWHAE,YWHAZ,YWHAB
Pyruvate Fermentation to Lactate	2,9E00	3,33E-01	NaN	LDHA,LDHB
Pentose Phosphate Pathway (Non-oxidative Branch)	2,9E00	3,33E-01	NaN	TKT,TALDO1
Dendritic Cell Maturation	2,86E00	3,95E-02	NaN	COL3A1,COL1A2,PDIA3,COL2A1,IGHG1,B2M,COL1A1
VEGF Signaling	2,77E00	5,43E-02	NaN	VCL,ACTG1,ACTN1,ACTN4,YWHAE
Aspartate Degradation II	2,76E00	2,86E-01	NaN	GOT2,MDH1
Lipid Antigen Presentation by CD1	2,75E00	1,15E-01	NaN	CALR,PDIA3,B2M
Clathrin-mediated Endocytosis Signaling	2,75E00	3,78E-02	NaN	LYZ,S100A8,APOB,ACTG1,HSPA8,APOD,ALB
Sucrose Degradation V (Mammalian)	2,53E00	2,22E-01	NaN	TPI1,ALDOA
Caveolar-mediated Endocytosis Signaling	2,36E00	5,63E-02	NaN	ACTG1,FLNA,B2M,ALB
Complement System	2,31E00	8,11E-02	NaN	C4A/C4B,C3,SERPING1
Role of IL-17A in Psoriasis	2,2E00	1,54E-01	NaN	S100A8,S100A9
Guanosine Nucleotides Degradation III	2,2E00	1,54E-01	NaN	PNP,NT5E
Sertoli Cell-Sertoli Cell Junction Signaling	2,18E00	3,37E-02	NaN	A2M,VCL,ACTG1,JUP,ACTN1,ACTN4
Production of Nitric Oxide and Reactive Oxygen Species in Macrophages	2,16E00	3,33E-02	NaN	LYZ,S100A8,APOB,APOD,CAT,ALB
Urate Biosynthesis/Inosine 5'-phosphate Degradation	2,14E00	1,43E-01	NaN	PNP,NT5E
IL-12 Signaling and Production in Macrophages	2,07E00	3,73E-02	NaN	LYZ,S100A8,APOB,APOD,ALB
Xanthine and Xanthosine Salvage	2,03E00	1E00	NaN	PNP
eNOS Signaling	1,97E00	3,52E-02	NaN	GNAS,CALM1 (includes others),HSPA8,HSP90B1,HSPA5
Adenosine Nucleotides Degradation II	1,97E00	1,18E-01	NaN	PNP,NT5E
Epithelial Adherens Junction Signaling	1,92E00	3,42E-02	NaN	VCL,ACTG1,JUP,ACTN1,ACTN4
Granzyme A Signaling	1,83E00	1E-01	NaN	NME1,APEX1
Purine Nucleotides Degradation II (Aerobic)	1,83E00	1E-01	NaN	PNP,NT5E
Paxillin Signaling	1,83E00	3,96E-02	NaN	VCL,ACTG1,ACTN1,ACTN4
Glucocorticoid Receptor Signaling	1,83E00	2,55E-02	NaN	A2M,HSPA8,HSP90B1,HSPA5,SERPINE1,KRT32,ANXA1
HIF1α Signaling	1,82E00	3,92E-02	NaN	MMP2,LDHA,APEX1,LDHB
Glioma Invasiveness Signaling	1,79E00	5,26E-02	NaN	MMP2,TIMP1,TIMP2
Regulation of Cellular Mechanics by Calpain Protease	1,79E00	5,26E-02	NaN	VCL,ACTN1,ACTN4
Guanine and Guanosine Salvage I	1,73E00	5E-01	NaN	PNP
Adenine and Adenosine Salvage I	1,73E00	5E-01	NaN	PNP
Hypoxia Signaling in the Cardiovascular System	1,64E00	4,62E-02	NaN	HSP90B1,LDHA,P4HB
RhoGDI Signaling	1,64E00	2,89E-02	NaN	GNAS,CFL1,ACTG1,MSN,GDI2
phagosome maturation	1,59E00	3,33E-02	NaN	CALR,B2M,PRDX2,PRDX1
Agrin Interactions at Neuromuscular Junction	1,57E00	4,35E-02	NaN	ACTG1,LAMB1,LAMC1
NRF2-mediated Oxidative Stress Response	1,57E00	2,78E-02	NaN	ACTG1,CAT,TXN,PPIB,PRDX1
RhoA Signaling	1,56E00	3,28E-02	NaN	CFL1,PFN1,ACTG1,MSN
NADH Repair	1,56E00	3,33E-01	NaN	GAPDH
Glutathione Biosynthesis	1,56E00	3,33E-01	NaN	GSS
Thyroid Hormone Biosynthesis	1,56E00	3,33E-01	NaN	CTSD
Glutamate Degradation II	1,56E00	3,33E-01	NaN	GOT2
Aspartate Biosynthesis	1,56E00	3,33E-01	NaN	GOT2
ERK/MAPK Signaling	1,51E00	2,67E-02	NaN	HIST3H3,YWHAQ,YWHAG,YWHAZ,YWHAB
Cellular Effects of Sildenafil (Viagra)	1,49E00	3,1E-02	NaN	GNAS,CALM1 (includes others),ACTG1,PDIA3
Cytotoxic T Lymphocyte-mediated Apoptosis of Target Cells	1,45E00	6,25E-02	NaN	B2M,CYCS
Arsenate Detoxification I (Glutaredoxin)	1,43E00	2,5E-01	NaN	PNP
Glutathione Redox Reactions II	1,43E00	2,5E-01	NaN	PDIA3
Arginine Degradation I (Arginase Pathway)	1,43E00	2,5E-01	NaN	ARG1
L-cysteine Degradation I	1,43E00	2,5E-01	NaN	GOT2
Inhibition of Angiogenesis by TSP1	1,4E00	5,88E-02	NaN	HSPG2,THBS1
Pentose Phosphate Pathway (Oxidative Branch)	1,34E00	2E-01	NaN	PGLS
Serine Biosynthesis	1,34E00	2E-01	NaN	PSAT1
Virus Entry via Endocytic Pathways	1,3E00	3,37E-02	NaN	ACTG1,FLNA,B2M
Docosahexaenoic Acid (DHA) Signaling	1,29E00	5,13E-02	NaN	SERPINF1,CYCS
Aldosterone Signaling in Epithelial Cells	1,27E00	2,63E-02	NaN	HSPA8,HSP90B1,HSPA5,PDIA3
Urea Cycle	1,26E00	1,67E-01	NaN	ARG1
Arginine Degradation VI (Arginase 2 Pathway)	1,26E00	1,67E-01	NaN	ARG1
Thioredoxin Pathway	1,26E00	1,67E-01	NaN	TXN
Rapoport-Luebering Glycolytic Shunt	1,26E00	1,67E-01	NaN	PGAM1
GDP-mannose Biosynthesis	1,26E00	1,67E-01	NaN	GPI
Death Receptor Signaling	1,26E00	3,26E-02	NaN	ACTG1,CYCS,LMNA
Superpathway of Serine and Glycine Biosynthesis I	1,2E00	1,43E-01	NaN	PSAT1
Adenine and Adenosine Salvage III	1,2E00	1,43E-01	NaN	PNP
Huntington's Disease Signaling	1,2E00	2,18E-02	NaN	CASP14,HSPA8,HSPA5,CYCS,CTSD
CDK5 Signaling	1,19E00	3,03E-02	NaN	GNAS,LAMB1,LAMC1
Signaling by Rho Family GTPases	1,17E00	2,14E-02	NaN	VIM,GNAS,CFL1,ACTG1,MSN
Airway Pathology in Chronic Obstructive Pulmonary Disease	1,14E00	1,25E-01	NaN	MMP2
Citrulline Biosynthesis	1,14E00	1,25E-01	NaN	ARG1
Superoxide Radicals Degradation	1,14E00	1,25E-01	NaN	CAT
Purine Ribonucleosides Degradation to Ribose-1-phosphate	1,14E00	1,25E-01	NaN	PNP
UDP-N-acetyl-D-galactosamine Biosynthesis II	1,09E00	1,11E-01	NaN	GPI
Sphingosine-1-phosphate Signaling	1,09E00	2,75E-02	NaN	CASP14,GNAS,PDIA3
phagosome formation	1,09E00	2,75E-02	NaN	FN1,PDIA3,IGHG1
Corticotropin Releasing Hormone Signaling	1,07E00	2,7E-02	NaN	GNAS,CALM1 (includes others),KRT1
Androgen Signaling	1,07E00	2,7E-02	NaN	CALR,GNAS,CALM1 (includes others)
PPARα/RXRα Activation	1,06E00	2,23E-02	NaN	GNAS,HSP90B1,GOT2,PDIA3
Semaphorin Signaling in Neurons	1,06E00	3,77E-02	NaN	CFL1,SEMA7A
Calcium Transport I	1,05E00	1E-01	NaN	ANXA5
CCR3 Signaling in Eosinophils	1,02E00	2,56E-02	NaN	GNAS,CFL1,CALM1 (includes others)
Nur77 Signaling in T Lymphocytes	1,01E00	3,51E-02	NaN	CALM1 (includes others),CYCS
Agranulocyte Adhesion and Diapedesis	9,97E-01	2,12E-02	NaN	FN1,MMP2,ACTG1,MSN
Sperm Motility	9,84E-01	2,48E-02	NaN	GNAS,CALM1 (includes others),PDIA3
BER pathway	9,74E-01	8,33E-02	NaN	APEX1
PI3K Signaling in B Lymphocytes	9,3E-01	2,34E-02	NaN	CALM1 (includes others),C3,PDIA3
Integrin Signaling	9,25E-01	1,99E-02	NaN	VCL,ACTG1,ACTN1,ACTN4
Superpathway of Citrulline Metabolism	9,11E-01	7,14E-02	NaN	ARG1
Phenylalanine Degradation IV (Mammalian, via Side Chain)	9,11E-01	7,14E-02	NaN	GOT2
Colanic Acid Building Blocks Biosynthesis	9,11E-01	7,14E-02	NaN	GPI
Cardiac β-adrenergic Signaling	8,94E-01	2,26E-02	NaN	AKAP13,GNAS,APEX1
nNOS Signaling in Skeletal Muscle Cells	8,83E-01	6,67E-02	NaN	CALM1 (includes others)
Chondroitin Sulfate Degradation (Metazoa)	8,83E-01	6,67E-02	NaN	GM2A
γ-glutamyl Cycle	8,83E-01	6,67E-02	NaN	GSS
Vitamin-C Transport	8,83E-01	6,67E-02	NaN	TXN
CCR5 Signaling in Macrophages	8,68E-01	2,9E-02	NaN	GNAS,CALM1 (includes others)
Growth Hormone Signaling	8,68E-01	2,9E-02	NaN	A2M,IGFBP3
Melatonin Signaling	8,58E-01	2,86E-02	NaN	CALM1 (includes others),PDIA3
Granzyme B Signaling	8,57E-01	6,25E-02	NaN	CYCS
Extrinsic Prothrombin Activation Pathway	8,57E-01	6,25E-02	NaN	SERPINC1
Dermatan Sulfate Degradation (Metazoa)	8,57E-01	6,25E-02	NaN	GM2A
Parkinson's Signaling	8,57E-01	6,25E-02	NaN	CYCS
Chemokine Signaling	8,49E-01	2,82E-02	NaN	CFL1,CALM1 (includes others)
GPCR-Mediated Integration of Enteroendocrine Signaling Exemplified by an L Cell	8,49E-01	2,82E-02	NaN	GNAS,PDIA3
Ephrin B Signaling	8,29E-01	2,74E-02	NaN	GNAS,CFL1
cAMP-mediated signaling	8,29E-01	1,83E-02	NaN	AKAP13,GNAS,CALM1 (includes others),APEX1
Leptin Signaling in Obesity	8,2E-01	2,7E-02	NaN	GNAS,PDIA3
VDR/RXR Activation	7,84E-01	2,56E-02	NaN	IGFBP3,IGFBP6
Ceramide Signaling	7,67E-01	2,5E-02	NaN	CYCS,CTSD
Gap Junction Signaling	7,54E-01	1,94E-02	NaN	GNAS,ACTG1,PDIA3
Phospholipase C Signaling	7,44E-01	1,69E-02	NaN	PEBP1,GNAS,CALM1 (includes others),IGHG1
Allograft Rejection Signaling	7,34E-01	2,38E-02	NaN	IGHG1,B2M
GPCR-Mediated Nutrient Sensing in Enteroendocrine Cells	7,34E-01	2,38E-02	NaN	GNAS,PDIA3
Maturity Onset Diabetes of Young (MODY) Signaling	7,3E-01	4,55E-02	NaN	GAPDH
Pyrimidine Deoxyribonucleotides De Novo Biosynthesis I	7,3E-01	4,55E-02	NaN	NME1
Ethanol Degradation IV	7,3E-01	4,55E-02	NaN	CAT
TR/RXR Activation	7,26E-01	2,35E-02	NaN	COL6A3,ENO1
Dopamine-DARPP32 Feedback in cAMP Signaling	7,21E-01	1,86E-02	NaN	GNAS,CALM1 (includes others),PDIA3
TCA Cycle II (Eukaryotic)	7,13E-01	4,35E-02	NaN	MDH1
α-Adrenergic Signaling	7,11E-01	2,3E-02	NaN	GNAS,CALM1 (includes others)
Bladder Cancer Signaling	7,11E-01	2,3E-02	NaN	MMP2,THBS1
FAK Signaling	7,11E-01	2,3E-02	NaN	VCL,ACTG1
UVA-Induced MAPK Signaling	7,04E-01	2,27E-02	NaN	PDIA3,CYCS
Communication between Innate and Adaptive Immune Cells	6,96E-01	2,25E-02	NaN	IGHG1,B2M
Apoptosis Signaling	6,96E-01	2,25E-02	NaN	CYCS,LMNA
Tumoricidal Function of Hepatic Natural Killer Cells	6,96E-01	4,17E-02	NaN	CYCS
Regulation of Actin-based Motility by Rho	6,82E-01	2,2E-02	NaN	CFL1,PFN1
CREB Signaling in Neurons	6,7E-01	1,75E-02	NaN	GNAS,CALM1 (includes others),PDIA3
NAD Salvage Pathway II	6,65E-01	3,85E-02	NaN	NT5E
Endothelin-1 Signaling	6,65E-01	1,74E-02	NaN	CASP14,GNAS,PDIA3
Axonal Guidance Signaling	6,59E-01	1,38E-02	NaN	GNAS,CFL1,PFN1,MMP2,SEMA7A,PDIA3
B Cell Receptor Signaling	6,55E-01	1,72E-02	NaN	CFL1,CALM1 (includes others),IGHG1
Calcium Signaling	6,37E-01	1,69E-02	NaN	CALR,CALM1 (includes others),TPM1
Amyotrophic Lateral Sclerosis Signaling	6,35E-01	2,04E-02	NaN	CAT,CYCS
p53 Signaling	6,35E-01	2,04E-02	NaN	SERPINE2,THBS1
Role of NFAT in Cardiac Hypertrophy	6,32E-01	1,68E-02	NaN	GNAS,CALM1 (includes others),PDIA3
Antioxidant Action of Vitamin C	6,28E-01	2,02E-02	NaN	TXN,PDIA3
Pyrimidine Ribonucleotides Interconversion	6,24E-01	3,45E-02	NaN	NME1
Nitric Oxide Signaling in the Cardiovascular System	6,22E-01	2E-02	NaN	CALM1 (includes others),HSP90B1
EIF2 Signaling	6,05E-01	1,62E-02	NaN	RPLP0,RPL18,RPSA
Pyrimidine Ribonucleotides De Novo Biosynthesis	5,99E-01	3,23E-02	NaN	NME1
Superpathway of Methionine Degradation	5,87E-01	3,12E-02	NaN	GOT2
G Protein Signaling Mediated by Tubby	5,75E-01	3,03E-02	NaN	GNAS
fMLP Signaling in Neutrophils	5,74E-01	1,85E-02	NaN	GNAS,CALM1 (includes others)
Oncostatin M Signaling	5,64E-01	2,94E-02	NaN	CHI3L1
TWEAK Signaling	5,64E-01	2,94E-02	NaN	CYCS
Role of Tissue Factor in Cancer	5,63E-01	1,82E-02	NaN	CFL1,P4HB
tRNA Splicing	5,54E-01	2,86E-02	NaN	APEX1
IL-6 Signaling	5,32E-01	1,72E-02	NaN	A2M,COL1A1
Role of Macrophages, Fibroblasts and Endothelial Cells in Rheumatoid Arthritis	5,26E-01	1,35E-02	NaN	FN1,CALM1 (includes others),PDIA3,IGHG1
Synaptic Long Term Potentiation	5,17E-01	1,68E-02	NaN	CALM1 (includes others),PDIA3
P2Y Purigenic Receptor Signaling Pathway	5,17E-01	1,68E-02	NaN	GNAS,PDIA3
Gustation Pathway	5,07E-01	1,65E-02	NaN	GNAS,APEX1
Role of PKR in Interferon Induction and Antiviral Response	5,05E-01	2,5E-02	NaN	CYCS
Neuroprotective Role of THOP1 in Alzheimer's Disease	5,05E-01	2,5E-02	NaN	YWHAE
Mechanisms of Viral Exit from Host Cells	4,96E-01	2,44E-02	NaN	ACTG1
Role of Pattern Recognition Receptors in Recognition of Bacteria and Viruses	4,84E-01	1,59E-02	NaN	C3,PTX3
iNOS Signaling	4,71E-01	2,27E-02	NaN	CALM1 (includes others)
Serotonin Receptor Signaling	4,71E-01	2,27E-02	NaN	GNAS
Cardiac Hypertrophy Signaling	4,63E-01	1,35E-02	NaN	GNAS,CALM1 (includes others),PDIA3
MSP-RON Signaling Pathway	4,56E-01	2,17E-02	NaN	ACTG1
Autoimmune Thyroid Disease Signaling	4,48E-01	2,13E-02	NaN	IGHG1
Hematopoiesis from Pluripotent Stem Cells	4,48E-01	2,13E-02	NaN	IGHG1
nNOS Signaling in Neurons	4,48E-01	2,13E-02	NaN	CALM1 (includes others)
Relaxin Signaling	4,45E-01	1,48E-02	NaN	GNAS,APEX1
Primary Immunodeficiency Signaling	4,41E-01	2,08E-02	NaN	IGHG1
Ephrin A Signaling	4,41E-01	2,08E-02	NaN	CFL1
TNFR1 Signaling	4,34E-01	2,04E-02	NaN	CYCS
Aryl Hydrocarbon Receptor Signaling	4,25E-01	1,43E-02	NaN	HSP90B1,CTSD
Synaptic Long Term Depression	4,18E-01	1,41E-02	NaN	GNAS,PDIA3
CD27 Signaling in Lymphocytes	4,14E-01	1,92E-02	NaN	CYCS
UVB-Induced MAPK Signaling	4,07E-01	1,89E-02	NaN	HIST3H3
Lymphotoxin β Receptor Signaling	4,01E-01	1,85E-02	NaN	CYCS
Gαq Signaling	3,99E-01	1,36E-02	NaN	GNAS,CALM1 (includes others)
Wnt/Ca+ pathway	3,89E-01	1,79E-02	NaN	PDIA3
Glutamate Receptor Signaling	3,83E-01	1,75E-02	NaN	CALM1 (includes others)
Phospholipases	3,77E-01	1,72E-02	NaN	PDIA3
Induction of Apoptosis by HIV1	3,66E-01	1,67E-02	NaN	CYCS
Tec Kinase Signaling	3,66E-01	1,27E-02	NaN	GNAS,ACTG1
Retinoic acid Mediated Apoptosis Signaling	3,56E-01	1,61E-02	NaN	CYCS
Activation of IRF by Cytosolic Pattern Recognition Receptors	3,51E-01	1,59E-02	NaN	PPIB
PCP pathway	3,51E-01	1,59E-02	NaN	PFN1
Calcium-induced T Lymphocyte Apoptosis	3,46E-01	1,56E-02	NaN	CALM1 (includes others)
Mitotic Roles of Polo-Like Kinase	3,36E-01	1,52E-02	NaN	HSP90B1
Tight Junction Signaling	3,35E-01	1,2E-02	NaN	VCL,ACTG1
Cdc42 Signaling	3,35E-01	1,2E-02	NaN	CFL1,B2M
GABA Receptor Signaling	3,31E-01	1,49E-02	NaN	GNAS
Macropinocytosis Signaling	3,27E-01	1,47E-02	NaN	ACTN4
Mitochondrial Dysfunction	3,24E-01	1,17E-02	NaN	CAT,CYCS
Role of NFAT in Regulation of the Immune Response	3,24E-01	1,17E-02	NaN	GNAS,CALM1 (includes others)
Ephrin Receptor Signaling	3,16E-01	1,15E-02	NaN	GNAS,CFL1
Small Cell Lung Cancer Signaling	3,13E-01	1,41E-02	NaN	CYCS
PEDF Signaling	3,13E-01	1,41E-02	NaN	SERPINF1
IL-17 Signaling	3,09E-01	1,39E-02	NaN	TIMP1
Granulocyte Adhesion and Diapedesis	3,08E-01	1,13E-02	NaN	MMP2,MSN
HER-2 Signaling in Breast Cancer	2,93E-01	1,32E-02	NaN	MMP2
IL-8 Signaling	2,9E-01	1,09E-02	NaN	GNAS,MMP2
Dopamine Receptor Signaling	2,85E-01	1,28E-02	NaN	GNAS
Acute Myeloid Leukemia Signaling	2,81E-01	1,27E-02	NaN	JUP
Regulation of IL-2 Expression in Activated and Anergic T Lymphocytes	2,81E-01	1,27E-02	NaN	CALM1 (includes others)
RAR Activation	2,75E-01	1,05E-02	NaN	GNAS,IGFBP3
Thrombin Signaling	2,73E-01	1,05E-02	NaN	GNAS,PDIA3
Breast Cancer Regulation by Stathmin1	2,73E-01	1,05E-02	NaN	GNAS,CALM1 (includes others)
Prostate Cancer Signaling	2,7E-01	1,22E-02	NaN	HSP90B1
Melanocyte Development and Pigmentation Signaling	2,64E-01	1,19E-02	NaN	GNAS
TGF-β Signaling	2,54E-01	1,15E-02	NaN	SERPINE1
Neuregulin Signaling	2,5E-01	1,14E-02	NaN	HSP90B1
CTLA4 Signaling in Cytotoxic T Lymphocytes	2,5E-01	1,14E-02	NaN	B2M
G Beta Gamma Signaling	2,5E-01	1,14E-02	NaN	GNAS
RANK Signaling in Osteoclasts	2,5E-01	1,14E-02	NaN	CALM1 (includes others)
Crosstalk between Dendritic Cells and Natural Killer Cells	2,47E-01	1,12E-02	NaN	ACTG1
PAK Signaling	2,47E-01	1,12E-02	NaN	CFL1
OX40 Signaling Pathway	2,47E-01	1,12E-02	NaN	B2M
IL-1 Signaling	2,41E-01	1,1E-02	NaN	GNAS
Fcγ Receptor-mediated Phagocytosis in Macrophages and Monocytes	2,35E-01	1,08E-02	NaN	ACTG1
Salvage Pathways of Pyrimidine Ribonucleotides	2,35E-01	1,08E-02	NaN	NME1
PPAR Signaling	2,32E-01	1,06E-02	NaN	HSP90B1
Glioma Signaling	2,29E-01	1,05E-02	NaN	CALM1 (includes others)
T Cell Receptor Signaling	2,24E-01	1,03E-02	NaN	CALM1 (includes others)
Telomerase Signaling	2,18E-01	1,01E-02	NaN	HSP90B1
Neuropathic Pain Signaling In Dorsal Horn Neurons	2,16E-01	1E-02	NaN	PDIA3
Rac Signaling	2,05E-01	9,62E-03	NaN	CFL1

## Sheet: BM MSC
© 2000-2016 QIAGEN. All rights reserved.
Ingenuity Canonical Pathways	-log(p-value)	Ratio	z-score	Molecules
Hepatic Fibrosis / Hepatic Stellate Cell Activation	1,98E01	1,64E-01	NaN	IGFBP4,COL7A1,TGFB1,MMP2,COL6A1,CTGF,COL1A1,MYH9,A2M,COL12A1,FN1,IGFBP3,VEGFC,COL4A1,COL6A3,COL3A1,COL1A2,IGFBP5,COL8A1,MYL9,COL6A2,COL5A1,TIMP2,COL5A2,COL11A1,COL4A2,TIMP1,SERPINE1,BAX,MMP1
Actin Cytoskeleton Signaling	1,57E01	1,29E-01	NaN	IQGAP1,CDC42,ACTR2,VCL,ARPC1B,MYH9,ARPC5,FN1,CFL1,PFN1,ACTG1,ACTN4,TLN1,ARPC3,FLNA,EZR,MYL12A,MSN,ACTN1,MYL9,ACTR3,CFL2,RDX,ARPC2,PPP1CB,GNG12,ACTA1,RAC1
Protein Ubiquitination Pathway	1,3E01	1,06E-01	NaN	PSMB6,UBA1,HSPD1,PSMA3,PSMB5,PSME2,HSPE1,PSMB1,PSMA7,HSPA8,UBE2V2,PSMA2,PSMB2,PSMD2,PSMA1,HSP90AA1,PSMA5,UCHL1,HSP90B1,PSMA6,UBE2V1,PSME1,UBE2D3,HSPB1,PSMB4,HSPA5,HSP90AB1
Remodeling of Epithelial Adherens Junctions	1,21E01	2,21E-01	NaN	IQGAP1,ACTR2,ARPC3,VCL,MAPRE1,ACTN1,NME1,ARPC1B,ACTR3,ARPC2,ARPC5,RAB7A,ACTG1,ACTA1,ACTN4
RhoGDI Signaling	1,14E01	1,21E-01	NaN	CDH2,CDC42,ACTR2,ARPC3,GNB2L1,EZR,MYL12A,MSN,GDI2,MYL9,ARPC1B,ACTR3,RDX,CFL2,ARPC2,ARPC5,CFL1,ACTG1,GNG12,ACTA1,RAC1
Signaling by Rho Family GTPases	1,05E01	9,83E-02	NaN	IQGAP1,CDH2,CDC42,ACTR2,ARPC3,GNB2L1,EZR,MYL12A,MSN,MYL9,ARPC1B,ACTR3,RDX,STMN1,CFL2,VIM,ARPC2,ARPC5,CFL1,ACTG1,GNG12,ACTA1,RAC1
RhoA Signaling	1,03E01	1,39E-01	NaN	ACTR2,ARPC3,EZR,MYL12A,MSN,MYL9,ARPC1B,ACTR3,RDX,CFL2,ARPC2,ARPC5,CFL1,PFN1,ACTG1,PPP1CB,ACTA1
Regulation of Actin-based Motility by Rho	9,14E00	1,54E-01	NaN	CDC42,ACTR2,ARPC3,MYL12A,MYL9,ACTR3,ARPC1B,ARPC2,ARPC5,CFL1,PFN1,PPP1CB,ACTA1,RAC1
ILK Signaling	9,04E00	1,02E-01	NaN	FLNB,CDC42,VCL,FLNA,RSU1,MYL9,ACTN1,CFL2,MYH9,VIM,FN1,CFL1,ACTG1,PPP2R1A,FLNC,ACTA1,ACTN4,VEGFC,NACA
Epithelial Adherens Junction Signaling	9,02E00	1,16E-01	NaN	IQGAP1,CDH2,CDC42,ACTR2,ARPC3,VCL,MYL9,ACTN1,ARPC1B,ACTR3,MYH9,ARPC2,ARPC5,ACTG1,ACTA1,ACTN4,RAC1
Integrin Signaling	7,69E00	8,96E-02	NaN	CDC42,ACTR2,TLN1,ARPC3,VCL,MYL12A,MYL9,ACTN1,ARPC1B,ACTR3,ARPC2,ARPC5,ACTG1,ARF4,PPP1CB,ACTA1,ACTN4,RAC1
Clathrin-mediated Endocytosis Signaling	7,46E00	9,19E-02	NaN	CDC42,ACTR2,ARPC3,CLTC,ARPC1B,ACTR3,ARPC2,ARPC5,RAB7A,ACTG1,HSPA8,CLU,APOE,ACTA1,RAC1,VEGFC,ALB
Ephrin Receptor Signaling	7,06E00	9,2E-02	NaN	CXCL12,CDC42,ACTR2,ARPC3,GNB2L1,ARPC1B,ACTR3,CFL2,ARPC2,ARPC5,CFL1,ACP1,GNG12,ANGPT1,RAC1,VEGFC
Fcγ Receptor-mediated Phagocytosis in Macrophages and Monocytes	7,04E00	1,29E-01	NaN	ARPC2,ARPC5,CDC42,ACTR2,ARPC3,TLN1,ACTG1,EZR,ACTA1,ACTR3,ARPC1B,RAC1
Leukocyte Extravasation Signaling	7,02E00	8,59E-02	NaN	CXCL12,CDC42,MMP2,VCL,EZR,MSN,ACTN1,EDIL3,RDX,TIMP2,MMP3,ACTG1,TIMP1,ACTA1,ACTN4,RAC1,MMP1
IGF-1 Signaling	6,84E00	1,24E-01	NaN	IGFBP4,YWHAQ,YWHAG,IGFBP7,CTGF,IGFBP3,IGFBP5,YWHAE,YWHAZ,YWHAH,YWHAB,IGFBP6
Glycolysis I	6,73E00	2,8E-01	NaN	TPI1,PGAM1,PGK1,PKM,GAPDH,ALDOA,ENO1
Gluconeogenesis I	6,73E00	2,8E-01	NaN	PGAM1,PGK1,GAPDH,ALDOA,MDH2,ENO1,MDH1
Axonal Guidance Signaling	6,57E00	5,76E-02	NaN	CXCL12,CDC42,ACTR2,MMP2,PAPPA,ARPC1B,ADAMTS2,ARPC5,CFL1,PFN1,SEMA7A,VEGFC,ARPC3,GNB2L1,MYL12A,DPYSL2,MYL9,ACTR3,CFL2,ARPC2,NRP1,BMP1,GNG12,PDIA3,RAC1
Inhibition of Matrix Metalloproteases	6,47E00	2,05E-01	NaN	A2M,MMP3,MMP2,THBS2,HSPG2,TIMP1,MMP1,TIMP2
Rac Signaling	5,63E00	1,06E-01	NaN	ARPC2,ARPC5,IQGAP1,CDC42,ACTR2,CFL1,ARPC3,ACTR3,ARPC1B,RAC1,CFL2
Ephrin B Signaling	5,26E00	1,23E-01	NaN	CXCL12,CDC42,CFL1,ACP1,GNB2L1,HNRNPK,GNG12,RAC1,CFL2
Germ Cell-Sertoli Cell Junction Signaling	5,24E00	8,13E-02	NaN	IQGAP1,CDH2,CDC42,TGFB1,VCL,ACTN1,CFL2,A2M,CFL1,ACTG1,ACTA1,ACTN4,RAC1
Actin Nucleation by ARP-WASP Complex	5,22E00	1,43E-01	NaN	ARPC2,ARPC5,CDC42,ACTR2,ARPC3,ACTR3,ARPC1B,RAC1
Myc Mediated Apoptosis Signaling	5,1E00	1,38E-01	NaN	YWHAQ,YWHAG,BAX,CYCS,YWHAE,YWHAZ,YWHAH,YWHAB
Cdc42 Signaling	5,04E00	7,78E-02	NaN	IQGAP1,CDC42,ACTR2,ARPC3,MYL12A,MYL9,ACTR3,ARPC1B,CFL2,ARPC2,ARPC5,CFL1,PPP1CB
Atherosclerosis Signaling	4,88E00	8,87E-02	NaN	PRDX6,CXCL12,MMP3,TGFB1,CLU,COL3A1,COL1A2,APOE,COL1A1,MMP1,ALB
Hypoxia Signaling in the Cardiovascular System	4,73E00	1,23E-01	NaN	HSP90B1,UBE2V2,UBE2V1,LDHA,HSP90AB1,HSP90AA1,UBE2D3,P4HB
fMLP Signaling in Neutrophils	4,65E00	9,26E-02	NaN	ARPC2,ARPC5,CDC42,ACTR2,ARPC3,GNB2L1,GNG12,ACTR3,ARPC1B,RAC1
Pentose Phosphate Pathway	4,54E00	3,64E-01	NaN	TKT,PGD,G6PD,TALDO1
Semaphorin Signaling in Neurons	4,41E00	1,32E-01	NaN	CFL1,NRP1,DPYSL3,SEMA7A,DPYSL2,RAC1,CFL2
Acute Phase Response Signaling	4,3E00	7,1E-02	NaN	A2M,C4A/C4B,FN1,C3,SERPINF1,HNRNPK,SERPINE1,C1S,AHSG,SERPING1,ITIH2,ALB
PI3K/AKT Signaling	4,17E00	8,13E-02	NaN	YWHAQ,YWHAG,HSP90B1,PPP2R1A,HSP90AB1,YWHAE,YWHAZ,HSP90AA1,YWHAH,YWHAB
HIPPO signaling	3,85E00	9,3E-02	NaN	YWHAQ,YWHAG,PPP2R1A,PPP1CB,YWHAE,YWHAZ,YWHAH,YWHAB
Agranulocyte Adhesion and Diapedesis	3,84E00	6,35E-02	NaN	CXCL12,MMP3,FN1,MMP2,ACTG1,EZR,MSN,MYL9,ACTA1,MMP1,RDX,MYH9
Virus Entry via Endocytic Pathways	3,74E00	8,99E-02	NaN	FLNB,CDC42,ACTG1,FLNA,CLTC,FLNC,ACTA1,RAC1
Protein Kinase A Signaling	3,71E00	4,66E-02	NaN	FLNB,YWHAQ,YWHAG,TGFB1,GNB2L1,FLNA,MYL12A,MYL9,YWHAE,YWHAH,ACP1,PPP1CB,GNG12,PDIA3,FLNC,YWHAZ,APEX1,YWHAB
Cell Cycle: G2/M DNA Damage Checkpoint Regulation	3,66E00	1,22E-01	NaN	YWHAQ,YWHAG,YWHAE,YWHAZ,YWHAH,YWHAB
VEGF Signaling	3,64E00	8,7E-02	NaN	EIF2S1,VCL,ACTG1,ACTN1,ACTA1,ACTN4,YWHAE,VEGFC
14-3-3-mediated Signaling	3,62E00	7,69E-02	NaN	VIM,YWHAQ,YWHAG,PDIA3,BAX,YWHAE,YWHAZ,YWHAH,YWHAB
Caveolar-mediated Endocytosis Signaling	3,59E00	9,86E-02	NaN	FLNB,ACTG1,FLNA,COPE,FLNC,ACTA1,ALB
p70S6K Signaling	3,57E00	7,56E-02	NaN	YWHAQ,YWHAG,PPP2R1A,PDIA3,YWHAE,YWHAZ,YWHAH,EEF2,YWHAB
NRF2-mediated Oxidative Stress Response	3,42E00	6,11E-02	NaN	GSTO1,ACTG1,CBR1,TXN,ERP29,AKR1A1,ACTA1,PPIB,VCP,GSTP1,PRDX1
Paxillin Signaling	3,36E00	7,92E-02	NaN	CDC42,TLN1,VCL,ACTG1,ACTN1,ACTA1,ACTN4,RAC1
HIF1α Signaling	3,34E00	7,84E-02	NaN	MMP3,MMP2,LDHA,HSP90AA1,APEX1,VEGFC,MMP1,LDHB
Complement System	3,33E00	1,35E-01	NaN	C4A/C4B,C3,C1S,SERPING1,CFH
Role of Tissue Factor in Cancer	3,12E00	7,27E-02	NaN	CDC42,CFL1,CTGF,RAC1,VEGFC,MMP1,CFL2,P4HB
Huntington's Disease Signaling	3,08E00	5,24E-02	NaN	HSPA8,GNB2L1,PENK,CLTC,HSPA5,GNG12,BAX,PSME1,CYCS,CTSD,PSME2,ATP5B
ERK5 Signaling	3,07E00	9,52E-02	NaN	YWHAQ,YWHAG,YWHAE,YWHAZ,YWHAH,YWHAB
Aryl Hydrocarbon Receptor Signaling	3,05E00	6,43E-02	NaN	HSPB1,GSTO1,TGFB1,HSP90B1,BAX,HSP90AB1,GSTP1,CTSD,HSP90AA1
CD28 Signaling in T Helper Cells	2,92E00	6,78E-02	NaN	ARPC2,ARPC5,CDC42,ACTR2,ARPC3,ACTR3,ARPC1B,RAC1
Agrin Interactions at Neuromuscular Junction	2,86E00	8,7E-02	NaN	CDC42,ACTG1,LAMB1,LAMC1,ACTA1,RAC1
LXR/RXR Activation	2,85E00	6,61E-02	NaN	C4A/C4B,VTN,C3,SERPINF1,CLU,APOE,AHSG,ALB
Aldosterone Signaling in Epithelial Cells	2,8E00	5,92E-02	NaN	HSPB1,HSPA8,HSP90B1,HSPA5,HSPD1,PDIA3,HSP90AB1,HSP90AA1,HSPE1
Intrinsic Prothrombin Activation Pathway	2,79E00	1,38E-01	NaN	COL3A1,COL1A2,COL1A1,SERPINC1
IL-8 Signaling	2,77E00	5,43E-02	NaN	IQGAP1,MMP2,GNB2L1,GNG12,MYL9,ANGPT1,BAX,LASP1,RAC1,VEGFC
Arsenate Detoxification I (Glutaredoxin)	2,74E00	5E-01	NaN	GSTO1,PNP
ERK/MAPK Signaling	2,72E00	5,35E-02	NaN	HSPB1,YWHAQ,YWHAG,TLN1,PPP2R1A,PPP1CB,YWHAZ,YWHAH,YWHAB,RAC1
FXR/RXR Activation	2,72E00	6,3E-02	NaN	C4A/C4B,VTN,C3,SERPINF1,CLU,APOE,AHSG,ALB
Parkinson's Signaling	2,59E00	1,88E-01	NaN	PARK7,UCHL1,CYCS
Unfolded protein response	2,58E00	9,26E-02	NaN	HSPA8,HSP90B1,HSPA5,VCP,P4HB
Tight Junction Signaling	2,52E00	5,39E-02	NaN	CDC42,TGFB1,VCL,ACTG1,PPP2R1A,MYL9,ACTA1,RAC1,MYH9
Pentose Phosphate Pathway (Oxidative Branch)	2,52E00	4E-01	NaN	PGD,G6PD
Regulation of Cellular Mechanics by Calpain Protease	2,48E00	8,77E-02	NaN	TLN1,VCL,EZR,ACTN1,ACTN4
Glucocorticoid Receptor Signaling	2,42E00	4,36E-02	NaN	A2M,TGFB1,HSPA8,HSP90B1,HSPA5,SERPINE1,HSP90AB1,HSP90AA1,YWHAH,RAC1,MMP1,ANXA1
Pyruvate Fermentation to Lactate	2,35E00	3,33E-01	NaN	LDHA,LDHB
Pentose Phosphate Pathway (Non-oxidative Branch)	2,35E00	3,33E-01	NaN	TKT,TALDO1
PAK Signaling	2,3E00	6,74E-02	NaN	CDC42,CFL1,MYL12A,MYL9,RAC1,CFL2
Endoplasmic Reticulum Stress Pathway	2,24E00	1,43E-01	NaN	EIF2S1,HSP90B1,HSPA5
EIF2 Signaling	2,23E00	4,86E-02	NaN	RPL12,EIF2S1,RPL11,PPP1CB,RPS28,EIF4A1,RPS21,RPS20,RPS12
GDP-glucose Biosynthesis	2,21E00	2,86E-01	NaN	PGM1,PGM3
Aspartate Degradation II	2,21E00	2,86E-01	NaN	MDH2,MDH1
Mitotic Roles of Polo-Like Kinase	2,2E00	7,58E-02	NaN	TGFB1,HSP90B1,PPP2R1A,HSP90AB1,HSP90AA1
mTOR Signaling	2,19E00	4,79E-02	NaN	FKBP1A,PPP2R1A,RPS28,EIF4A1,RPS21,RAC1,VEGFC,RPS20,RPS12
Pyrimidine Deoxyribonucleotides De Novo Biosynthesis I	2,18E00	1,36E-01	NaN	CMPK1,NME1,AK1
Cellular Effects of Sildenafil (Viagra)	2,09E00	5,43E-02	NaN	ACTG1,MYL12A,PPP1CB,PDIA3,MYL9,ACTA1,MYH9
Airway Pathology in Chronic Obstructive Pulmonary Disease	2,09E00	2,5E-01	NaN	MMP2,MMP1
Glucose and Glucose-1-phosphate Degradation	2,09E00	2,5E-01	NaN	PGM1,PGM3
Ephrin A Signaling	1,99E00	8,33E-02	NaN	CDC42,CFL1,RAC1,CFL2
Sucrose Degradation V (Mammalian)	1,98E00	2,22E-01	NaN	TPI1,ALDOA
Glycogen Degradation II	1,89E00	2E-01	NaN	PGM1,PGM3
Granulocyte Adhesion and Diapedesis	1,86E00	4,52E-02	NaN	HSPB1,CXCL12,MMP3,MMP2,EZR,MSN,MMP1,RDX
Sertoli Cell-Sertoli Cell Junction Signaling	1,85E00	4,49E-02	NaN	A2M,CDC42,VCL,ACTG1,ACTN1,ACTA1,ACTN4,RAC1
Pyrimidine Ribonucleotides Interconversion	1,84E00	1,03E-01	NaN	CMPK1,NME1,AK1
Regulation of eIF4 and p70S6K Signaling	1,81E00	4,79E-02	NaN	EIF2S1,PPP2R1A,RPS28,EIF4A1,RPS21,RPS20,RPS12
Pyrimidine Ribonucleotides De Novo Biosynthesis	1,77E00	9,68E-02	NaN	CMPK1,NME1,AK1
Acetyl-CoA Biosynthesis III (from Citrate)	1,75E00	1E00	NaN	ACLY
Xanthine and Xanthosine Salvage	1,75E00	1E00	NaN	PNP
CCR3 Signaling in Eosinophils	1,75E00	5,13E-02	NaN	CFL1,GNB2L1,PPP1CB,GNG12,RAC1,CFL2
Glioma Invasiveness Signaling	1,74E00	7,02E-02	NaN	VTN,MMP2,TIMP1,TIMP2
Glycogen Degradation III	1,74E00	1,67E-01	NaN	PGM1,PGM3
Bladder Cancer Signaling	1,72E00	5,75E-02	NaN	MMP3,MMP2,THBS1,VEGFC,MMP1
FAK Signaling	1,72E00	5,75E-02	NaN	TLN1,VCL,ACTG1,ACTA1,RAC1
Guanosine Nucleotides Degradation III	1,67E00	1,54E-01	NaN	PNP,NT5E
Oncostatin M Signaling	1,66E00	8,82E-02	NaN	MMP3,CHI3L1,MMP1
Inhibition of Angiogenesis by TSP1	1,66E00	8,82E-02	NaN	TGFB1,HSPG2,THBS1
Coagulation System	1,63E00	8,57E-02	NaN	A2M,SERPINE1,SERPINC1
Death Receptor Signaling	1,62E00	5,43E-02	NaN	HSPB1,ACTG1,ACTA1,CYCS,LMNA
Urate Biosynthesis/Inosine 5'-phosphate Degradation	1,61E00	1,43E-01	NaN	PNP,NT5E
Colorectal Cancer Metastasis Signaling	1,6E00	3,81E-02	NaN	MMP3,TGFB1,MMP2,GNB2L1,GNG12,BAX,RAC1,VEGFC,MMP1
PCP pathway	1,6E00	6,35E-02	NaN	HSPB1,PFN1,CTHRC1,RAC1
Antigen Presentation Pathway	1,56E00	8,11E-02	NaN	PSMB6,PDIA3,PSMB5
Telomere Extension by Telomerase	1,55E00	1,33E-01	NaN	HNRNPA1,HNRNPA2B1
Vitamin-C Transport	1,55E00	1,33E-01	NaN	GSTO1,TXN
Docosahexaenoic Acid (DHA) Signaling	1,5E00	7,69E-02	NaN	SERPINF1,BAX,CYCS
tRNA Charging	1,5E00	7,69E-02	NaN	GARS,HARS,WARS
Guanine and Guanosine Salvage I	1,45E00	5E-01	NaN	PNP
Adenine and Adenosine Salvage I	1,45E00	5E-01	NaN	PNP
Adenosine Nucleotides Degradation II	1,45E00	1,18E-01	NaN	PNP,NT5E
eNOS Signaling	1,39E00	4,23E-02	NaN	HSPA8,HSP90B1,HSPA5,HSP90AB1,HSP90AA1,VEGFC
Granzyme A Signaling	1,32E00	1E-01	NaN	NME1,APEX1
Purine Nucleotides Degradation II (Aerobic)	1,32E00	1E-01	NaN	PNP,NT5E
Diphthamide Biosynthesis	1,28E00	3,33E-01	NaN	EEF2
NADH Repair	1,28E00	3,33E-01	NaN	GAPDH
D-glucuronate Degradation I	1,28E00	3,33E-01	NaN	AKR1A1
Hypusine Biosynthesis	1,28E00	3,33E-01	NaN	EIF5A
Thyroid Hormone Biosynthesis	1,28E00	3,33E-01	NaN	CTSD
CXCR4 Signaling	1,27E00	3,95E-02	NaN	CXCL12,GNB2L1,MYL12A,GNG12,MYL9,RAC1
Breast Cancer Regulation by Stathmin1	1,27E00	3,66E-02	NaN	CDC42,GNB2L1,PPP2R1A,PPP1CB,GNG12,RAC1,STMN1
Polyamine Regulation in Colon Cancer	1,24E00	9,09E-02	NaN	PSME1,PSME2
Prostate Cancer Signaling	1,24E00	4,88E-02	NaN	HSP90B1,HSP90AB1,GSTP1,HSP90AA1
Phospholipase C Signaling	1,22E00	3,38E-02	NaN	PEBP1,GNB2L1,MYL12A,PPP1CB,GNG12,MYL9,RAC1,MARCKS
TCA Cycle II (Eukaryotic)	1,21E00	8,7E-02	NaN	MDH2,MDH1
Tumoricidal Function of Hepatic Natural Killer Cells	1,18E00	8,33E-02	NaN	BAX,CYCS
TGF-β Signaling	1,16E00	4,6E-02	NaN	INHBA,CDC42,TGFB1,SERPINE1
Uracil Degradation II (Reductive)	1,16E00	2,5E-01	NaN	DPYSL2
Heme Degradation	1,16E00	2,5E-01	NaN	BLVRA
Ascorbate Recycling (Cytosolic)	1,16E00	2,5E-01	NaN	GSTO1
Glutathione Redox Reactions II	1,16E00	2,5E-01	NaN	PDIA3
Thymine Degradation	1,16E00	2,5E-01	NaN	DPYSL2
Neuregulin Signaling	1,15E00	4,55E-02	NaN	HSP90B1,DCN,HSP90AB1,HSP90AA1
Crosstalk between Dendritic Cells and Natural Killer Cells	1,13E00	4,49E-02	NaN	TLN1,ACTG1,ACTA1,FSCN1
NAD Salvage Pathway II	1,11E00	7,69E-02	NaN	ACP1,NT5E
Cardiac β-adrenergic Signaling	1,06E00	3,76E-02	NaN	GNB2L1,PPP2R1A,PPP1CB,GNG12,APEX1
IL-12 Signaling and Production in Macrophages	1,05E00	3,73E-02	NaN	RAB7A,TGFB1,CLU,APOE,ALB
Glutathione-mediated Detoxification	1,03E00	6,9E-02	NaN	GSTO1,GSTP1
Amyotrophic Lateral Sclerosis Signaling	1,02E00	4,08E-02	NaN	BAX,CYCS,RAC1,VEGFC
p53 Signaling	1,02E00	4,08E-02	NaN	SERPINE2,BAX,THBS1,TP53I3
Calcium Signaling	1,01E00	3,37E-02	NaN	TPM3,TPM4,MYL9,ACTA1,TPM1,MYH9
Role of p14/p19ARF in Tumor Suppression	1,01E00	6,67E-02	NaN	NPM1,RAC1
CDK5 Signaling	1E00	4,04E-02	NaN	LAMB1,LAMC1,PPP2R1A,PPP1CB
Telomerase Signaling	1E00	4,04E-02	NaN	HSP90B1,PPP2R1A,HSP90AB1,HSP90AA1
Antioxidant Action of Vitamin C	1E00	4,04E-02	NaN	PRDX6,GSTO1,TXN,PDIA3
Production of Nitric Oxide and Reactive Oxygen Species in Macrophages	9,95E-01	3,33E-02	NaN	CLU,PPP2R1A,PPP1CB,APOE,RAC1,ALB
Thioredoxin Pathway	9,93E-01	1,67E-01	NaN	TXN
UDP-N-acetyl-D-glucosamine Biosynthesis II	9,93E-01	1,67E-01	NaN	PGM3
Glycogen Biosynthesis II (from UDP-D-Glucose)	9,93E-01	1,67E-01	NaN	GBE1
Rapoport-Luebering Glycolytic Shunt	9,93E-01	1,67E-01	NaN	PGAM1
Nitric Oxide Signaling in the Cardiovascular System	9,92E-01	4E-02	NaN	HSP90B1,HSP90AB1,HSP90AA1,VEGFC
Cardiac Hypertrophy Signaling	9,9E-01	3,14E-02	NaN	HSPB1,TGFB1,GNB2L1,MYL12A,GNG12,PDIA3,MYL9
G Protein Signaling Mediated by Tubby	9,38E-01	6,06E-02	NaN	GNB2L1,GNG12
Adenine and Adenosine Salvage III	9,3E-01	1,43E-01	NaN	PNP
Pancreatic Adenocarcinoma Signaling	9,24E-01	3,77E-02	NaN	CDC42,TGFB1,RAC1,VEGFC
GDNF Family Ligand-Receptor Interactions	9,23E-01	4,41E-02	NaN	CDC42,PDLIM7,RAC1
Macropinocytosis Signaling	9,23E-01	4,41E-02	NaN	CDC42,ACTN4,RAC1
Thrombin Signaling	9,05E-01	3,14E-02	NaN	GNB2L1,MYL12A,PPP1CB,GNG12,PDIA3,MYL9
phagosome formation	8,92E-01	3,67E-02	NaN	FN1,VTN,PDIA3,MARCKS
Renal Cell Carcinoma Signaling	8,82E-01	4,23E-02	NaN	CDC42,TGFB1,RAC1
Chemokine Signaling	8,82E-01	4,23E-02	NaN	CXCL12,CFL1,PPP1CB
Purine Ribonucleosides Degradation to Ribose-1-phosphate	8,76E-01	1,25E-01	NaN	PNP
UDP-N-acetyl-D-galactosamine Biosynthesis II	8,28E-01	1,11E-01	NaN	PGM3
Gα12/13 Signaling	8,13E-01	3,42E-02	NaN	CDH2,CDC42,MYL12A,MYL9
Role of Macrophages, Fibroblasts and Endothelial Cells in Rheumatoid Arthritis	8,06E-01	2,7E-02	NaN	CXCL12,MMP3,FN1,TGFB1,PDIA3,RAC1,VEGFC,MMP1
Role of PKR in Interferon Induction and Antiviral Response	8,02E-01	5E-02	NaN	EIF2S1,CYCS
VDR/RXR Activation	7,95E-01	3,85E-02	NaN	IGFBP3,IGFBP5,IGFBP6
Calcium Transport I	7,86E-01	1E-01	NaN	ANXA5
Mechanisms of Viral Exit from Host Cells	7,86E-01	4,88E-02	NaN	ACTG1,ACTA1
HMGB1 Signaling	7,85E-01	3,33E-02	NaN	CDC42,TGFB1,SERPINE1,RAC1
phagosome maturation	7,85E-01	3,33E-02	NaN	PRDX6,RAB7A,PRDX2,PRDX1
Ceramide Signaling	7,72E-01	3,75E-02	NaN	PPP2R1A,CYCS,CTSD
Role of Pattern Recognition Receptors in Recognition of Bacteria and Viruses	7,33E-01	3,17E-02	NaN	EIF2S1,C3,TGFB1,PTX3
BER pathway	7,15E-01	8,33E-02	NaN	APEX1
MSP-RON Signaling Pathway	7,08E-01	4,35E-02	NaN	ACTG1,ACTA1
G Beta Gamma Signaling	6,89E-01	3,41E-02	NaN	CDC42,GNB2L1,GNG12
Dendritic Cell Maturation	6,87E-01	2,82E-02	NaN	COL3A1,COL1A2,PDIA3,COL1A1,FSCN1
NAD Phosphorylation and Dephosphorylation	6,83E-01	7,69E-02	NaN	ACP1
Apoptosis Signaling	6,8E-01	3,37E-02	NaN	BAX,CYCS,LMNA
PPARα/RXRα Activation	6,74E-01	2,79E-02	NaN	TGFB1,HSP90B1,PDIA3,HSP90AB1,HSP90AA1
TNFR1 Signaling	6,67E-01	4,08E-02	NaN	CDC42,CYCS
Heparan Sulfate Biosynthesis (Late Stages)	6,54E-01	4E-02	NaN	PRDX6,EXT2
Salvage Pathways of Pyrimidine Ribonucleotides	6,43E-01	3,23E-02	NaN	CMPK1,NME1,AK1
SAPK/JNK Signaling	6,34E-01	3,19E-02	NaN	CDC42,HNRNPK,RAC1
PPAR Signaling	6,34E-01	3,19E-02	NaN	HSP90B1,HSP90AB1,HSP90AA1
Chondroitin Sulfate Degradation (Metazoa)	6,29E-01	6,67E-02	NaN	CEMIP
Granzyme B Signaling	6,04E-01	6,25E-02	NaN	CYCS
Extrinsic Prothrombin Activation Pathway	6,04E-01	6,25E-02	NaN	SERPINC1
Dermatan Sulfate Degradation (Metazoa)	6,04E-01	6,25E-02	NaN	CEMIP
Methylglyoxal Degradation III	6,04E-01	6,25E-02	NaN	AKR1A1
RAN Signaling	5,82E-01	5,88E-02	NaN	KPNB1
Heparan Sulfate Biosynthesis	5,73E-01	3,51E-02	NaN	PRDX6,EXT2
Phospholipases	5,62E-01	3,45E-02	NaN	PRDX6,PDIA3
Valine Degradation I	5,61E-01	5,56E-02	NaN	HIBCH
Induction of Apoptosis by HIV1	5,42E-01	3,33E-02	NaN	BAX,CYCS
Glutathione Redox Reactions I	5,41E-01	5,26E-02	NaN	PRDX6
NGF Signaling	5,31E-01	2,8E-02	NaN	CDC42,BAX,RAC1
Tec Kinase Signaling	5,19E-01	2,55E-02	NaN	ACTG1,GNB2L1,GNG12,ACTA1
Antiproliferative Role of Somatostatin Receptor 2	5,13E-01	3,17E-02	NaN	GNB2L1,GNG12
Cell Cycle: G1/S Checkpoint Regulation	5,04E-01	3,12E-02	NaN	TGFB1,RPL11
Androgen Signaling	5,03E-01	2,7E-02	NaN	GNB2L1,GNG12,HSP90AA1
Maturity Onset Diabetes of Young (MODY) Signaling	4,88E-01	4,55E-02	NaN	GAPDH
Tryptophan Degradation X (Mammalian, via Tryptamine)	4,88E-01	4,55E-02	NaN	AKR1A1
Serotonin Degradation	4,78E-01	2,99E-02	NaN	AKR1A1,EXT2
IL-6 Signaling	4,71E-01	2,59E-02	NaN	A2M,HSPB1,COL1A1
CCR5 Signaling in Macrophages	4,61E-01	2,9E-02	NaN	GNB2L1,GNG12
Growth Hormone Signaling	4,61E-01	2,9E-02	NaN	A2M,IGFBP3
Role of MAPK Signaling in the Pathogenesis of Influenza	4,61E-01	2,9E-02	NaN	PRDX6,BAX
Role of Osteoblasts, Osteoclasts and Chondrocytes in Rheumatoid Arthritis	4,6E-01	2,28E-02	NaN	MMP3,TGFB1,BMP1,COL1A1,MMP1
PTEN Signaling	4,59E-01	2,54E-02	NaN	CDC42,YWHAH,RAC1
Xenobiotic Metabolism Signaling	4,58E-01	2,21E-02	NaN	GSTO1,HSP90B1,PPP2R1A,HSP90AB1,GSTP1,HSP90AA1
Triacylglycerol Degradation	4,57E-01	4,17E-02	NaN	PRDX6
P2Y Purigenic Receptor Signaling Pathway	4,53E-01	2,52E-02	NaN	GNB2L1,GNG12,PDIA3
PEDF Signaling	4,45E-01	2,82E-02	NaN	SERPINF1,RAC1
Mitochondrial Dysfunction	4,45E-01	2,34E-02	NaN	PARK7,CYCS,PRDX3,ATP5B
Sperm Motility	4,41E-01	2,48E-02	NaN	PRDX6,TWF1,PDIA3
IL-17 Signaling	4,37E-01	2,78E-02	NaN	MMP3,TIMP1
B Cell Receptor Signaling	4,31E-01	2,3E-02	NaN	CDC42,CFL1,RAC1,CFL2
LPS-stimulated MAPK Signaling	4,3E-01	2,74E-02	NaN	CDC42,RAC1
Lipid Antigen Presentation by CD1	4,3E-01	3,85E-02	NaN	PDIA3
Antiproliferative Role of TOB in T Cell Signaling	4,3E-01	3,85E-02	NaN	TGFB1
IL-15 Production	4,17E-01	3,7E-02	NaN	TWF1
HER-2 Signaling in Breast Cancer	4,08E-01	2,63E-02	NaN	CDC42,MMP2
VEGF Family Ligand-Receptor Interactions	4,08E-01	2,63E-02	NaN	NRP1,VEGFC
AMPK Signaling	4,08E-01	2,23E-02	NaN	CAB39,PPP2R1A,EEF2,AK1
Role of NFAT in Cardiac Hypertrophy	4,08E-01	2,23E-02	NaN	TGFB1,GNB2L1,GNG12,PDIA3
PI3K Signaling in B Lymphocytes	4,03E-01	2,34E-02	NaN	C3,PDIA3,RAC1
Cyclins and Cell Cycle Regulation	3,95E-01	2,56E-02	NaN	TGFB1,PPP2R1A
Dopamine Receptor Signaling	3,95E-01	2,56E-02	NaN	PPP2R1A,PPP1CB
Reelin Signaling in Neurons	3,88E-01	2,53E-02	NaN	PAFAH1B2,APOE
Regulation of IL-2 Expression in Activated and Anergic T Lymphocytes	3,88E-01	2,53E-02	NaN	TGFB1,RAC1
Regulation of the Epithelial-Mesenchymal Transition Pathway	3,86E-01	2,17E-02	NaN	LOX,CDH2,TGFB1,MMP2
Human Embryonic Stem Cell Pluripotency	3,72E-01	2,24E-02	NaN	INHBA,TGFB1,BMP1
Relaxin Signaling	3,68E-01	2,22E-02	NaN	GNB2L1,GNG12,APEX1
RAR Activation	3,62E-01	2,11E-02	NaN	TGFB1,IGFBP3,RAC1,MMP1
Cytotoxic T Lymphocyte-mediated Apoptosis of Target Cells	3,61E-01	3,12E-02	NaN	CYCS
GPCR-Mediated Nutrient Sensing in Enteroendocrine Cells	3,57E-01	2,38E-02	NaN	GNG12,PDIA3
TR/RXR Activation	3,51E-01	2,35E-02	NaN	COL6A3,ENO1
TWEAK Signaling	3,42E-01	2,94E-02	NaN	CYCS
α-Adrenergic Signaling	3,4E-01	2,3E-02	NaN	GNB2L1,GNG12
Synaptic Long Term Depression	3,36E-01	2,11E-02	NaN	PRDX6,PPP2R1A,PDIA3
CTLA4 Signaling in Cytotoxic T Lymphocytes	3,34E-01	2,27E-02	NaN	CLTC,PPP2R1A
UVA-Induced MAPK Signaling	3,34E-01	2,27E-02	NaN	PDIA3,CYCS
Cell Cycle Regulation by BTG Family Proteins	3,32E-01	2,86E-02	NaN	PPP2R1A
IL-17A Signaling in Fibroblasts	3,32E-01	2,86E-02	NaN	MMP1
Thyroid Hormone Metabolism II (via Conjugation and/or Degradation)	3,32E-01	2,86E-02	NaN	EXT2
tRNA Splicing	3,32E-01	2,86E-02	NaN	APEX1
Ethanol Degradation II	3,32E-01	2,86E-02	NaN	AKR1A1
Interferon Signaling	3,24E-01	2,78E-02	NaN	BAX
Glioblastoma Multiforme Signaling	3,19E-01	2,05E-02	NaN	CDC42,PDIA3,RAC1
IL-1 Signaling	3,18E-01	2,2E-02	NaN	GNB2L1,GNG12
Factors Promoting Cardiogenesis in Vertebrates	3,13E-01	2,17E-02	NaN	TGFB1,BMP1
Noradrenaline and Adrenaline Degradation	3,07E-01	2,63E-02	NaN	AKR1A1
Netrin Signaling	2,99E-01	2,56E-02	NaN	RAC1
Neuroprotective Role of THOP1 in Alzheimer's Disease	2,92E-01	2,5E-02	NaN	YWHAE
Gap Junction Signaling	2,85E-01	1,94E-02	NaN	ACTG1,PDIA3,ACTA1
Dopamine-DARPP32 Feedback in cAMP Signaling	2,64E-01	1,86E-02	NaN	PPP2R1A,PPP1CB,PDIA3
HGF Signaling	2,54E-01	1,9E-02	NaN	CDC42,RAC1
Sphingosine-1-phosphate Signaling	2,38E-01	1,83E-02	NaN	PDIA3,RAC1
Gαs Signaling	2,38E-01	1,83E-02	NaN	GNB2L1,GNG12
Oxidative Phosphorylation	2,38E-01	1,83E-02	NaN	CYCS,ATP5B
Wnt/β-catenin Signaling	2,38E-01	1,78E-02	NaN	CDH2,TGFB1,PPP2R1A
Type I Diabetes Mellitus Signaling	2,35E-01	1,82E-02	NaN	HSPD1,CYCS
Corticotropin Releasing Hormone Signaling	2,31E-01	1,8E-02	NaN	ARPC5,KRT1
CD27 Signaling in Lymphocytes	2,18E-01	1,92E-02	NaN	CYCS
Lymphotoxin β Receptor Signaling	2,08E-01	1,85E-02	NaN	CYCS
Role of IL-17A in Arthritis	2,08E-01	1,85E-02	NaN	MMP1
Nicotine Degradation III	2,08E-01	1,85E-02	NaN	EXT2
Role of Cytokines in Mediating Communication between Immune Cells	2,03E-01	1,82E-02	NaN	TGFB1
Role of CHK Proteins in Cell Cycle Checkpoint Control	2,03E-01	1,82E-02	NaN	PPP2R1A
Wnt/Ca+ pathway	1,99E-01	1,79E-02	NaN	PDIA3

## Sheet: A MSC
© 2000-2016 QIAGEN. All rights reserved.
Ingenuity Canonical Pathways	-log(p-value)	Ratio	z-score	Molecules
Hepatic Fibrosis / Hepatic Stellate Cell Activation	1,31E01	1,09E-01	NaN	IGFBP4,MMP2,COL6A3,TGFB1,COL6A1,COL3A1,COL1A2,COL1A1,COL6A2,COL5A1,TIMP2,MYH9,A2M,COL5A2,FN1,COL4A2,IGFBP3,TIMP1,SERPINE1,MMP1
Glycolysis I	7,88E00	2,8E-01	NaN	TPI1,PGAM1,PGK1,PKM,GAPDH,ALDOA,ENO1
Gluconeogenesis I	7,88E00	2,8E-01	NaN	PGAM1,PGK1,GAPDH,ALDOA,MDH2,ENO1,MDH1
Inhibition of Matrix Metalloproteases	7,77E00	2,05E-01	NaN	A2M,MMP3,MMP2,THBS2,HSPG2,TIMP1,MMP1,TIMP2
Actin Cytoskeleton Signaling	7,22E00	6,91E-02	NaN	ACTR2,TLN1,VCL,EZR,MYL12A,MSN,ACTN1,ARPC1B,RDX,MYH9,FN1,CFL1,PFN1,ACTG1,ACTN4
Remodeling of Epithelial Adherens Junctions	6,93E00	1,32E-01	NaN	TUBA1A,ACTR2,VCL,ACTG1,TUBB3,ACTN1,ACTN4,ARPC1B,TUBB4B
Leukocyte Extravasation Signaling	6,07E00	6,57E-02	NaN	MMP2,VCL,EZR,MSN,ACTN1,RDX,TIMP2,MMP3,GNAI2,ACTG1,TIMP1,ACTN4,MMP1
RhoA Signaling	5,66E00	8,2E-02	NaN	ACTR2,CFL1,PFN1,ACTG1,SEPT11,EZR,MYL12A,MSN,ARPC1B,RDX
RhoGDI Signaling	5,09E00	6,36E-02	NaN	GNAI2,ACTR2,CFL1,ACTG1,EZR,ARHGDIA,MYL12A,MSN,GDI2,ARPC1B,RDX
Epithelial Adherens Junction Signaling	4,96E00	6,85E-02	NaN	TUBA1A,ACTR2,VCL,ACTG1,TUBB3,ACTN1,ACTN4,ARPC1B,TUBB4B,MYH9
14-3-3-mediated Signaling	4,92E00	7,69E-02	NaN	VIM,YWHAQ,TUBA1A,YWHAG,TUBB3,PDIA3,YWHAZ,YWHAB,TUBB4B
Atherosclerosis Signaling	4,72E00	7,26E-02	NaN	MMP3,TGFB1,CLU,COL3A1,COL1A2,APOE,COL1A1,MMP1,ALB
IGF-1 Signaling	4,66E00	8,25E-02	NaN	IGFBP4,YWHAQ,YWHAG,IGFBP7,IGFBP3,YWHAZ,YWHAB,IGFBP6
Germ Cell-Sertoli Cell Junction Signaling	4,61E00	6,25E-02	NaN	A2M,TUBA1A,CFL1,TGFB1,VCL,ACTG1,TUBB3,ACTN1,ACTN4,TUBB4B
Sertoli Cell-Sertoli Cell Junction Signaling	4,22E00	5,62E-02	NaN	SPTBN1,A2M,TUBA1A,VCL,ACTG1,TUBB3,ACTN1,ACTN4,TUBB4B,SPTAN1
Protein Ubiquitination Pathway	4,2E00	4,71E-02	NaN	PSMB6,HSPB1,UBA1,HSPA8,HSP90B1,HSPA5,HSPD1,PSMB2,PSMB5,HSP90AB1,HSP90AA1,PSMA5
Axonal Guidance Signaling	4,12E00	3,69E-02	NaN	ACTR2,MMP2,TUBB3,PAPPA,MYL12A,DPYSL2,ARPC1B,TUBB4B,GNAI2,TUBA1A,CFL1,PFN1,BMP1,NRP1,SEMA7A,PDIA3
Agranulocyte Adhesion and Diapedesis	4E00	5,29E-02	NaN	GNAI2,MMP3,FN1,MMP2,ACTG1,EZR,MSN,MMP1,RDX,MYH9
Signaling by Rho Family GTPases	3,89E00	4,7E-02	NaN	VIM,GNAI2,ACTR2,CFL1,ACTG1,SEPT11,EZR,MYL12A,MSN,ARPC1B,RDX
Acute Phase Response Signaling	3,68E00	5,33E-02	NaN	A2M,FN1,C3,SERPINF1,APOH,SERPINE1,C1S,AHSG,ALB
Pentose Phosphate Pathway	3,58E00	2,73E-01	NaN	TKT,PGD,TALDO1
Intrinsic Prothrombin Activation Pathway	3,42E00	1,38E-01	NaN	COL3A1,COL1A2,COL1A1,SERPINC1
ILK Signaling	3,37E00	4,84E-02	NaN	VIM,FN1,CFL1,VCL,ACTG1,FLNC,ACTN1,ACTN4,MYH9
Unfolded protein response	3,33E00	9,26E-02	NaN	HSPA8,HSP90B1,HSPA5,VCP,P4HB
Aldosterone Signaling in Epithelial Cells	3,29E00	5,26E-02	NaN	HSPB1,HSPA8,HSP90B1,HSPA5,HSPD1,PDIA3,HSP90AB1,HSP90AA1
p70S6K Signaling	3,23E00	5,88E-02	NaN	GNAI2,YWHAQ,YWHAG,PDIA3,YWHAZ,EEF2,YWHAB
Regulation of Cellular Mechanics by Calpain Protease	3,22E00	8,77E-02	NaN	TLN1,VCL,EZR,ACTN1,ACTN4
LXR/RXR Activation	3,19E00	5,79E-02	NaN	C3,SERPINF1,CLU,APOH,APOE,AHSG,ALB
Telomere Extension by Telomerase	3,16E00	2E-01	NaN	HNRNPA1,XRCC6,HNRNPA2B1
PI3K/AKT Signaling	3,14E00	5,69E-02	NaN	YWHAQ,YWHAG,HSP90B1,HSP90AB1,YWHAZ,HSP90AA1,YWHAB
Coagulation System	3,1E00	1,14E-01	NaN	A2M,SERPINA5,SERPINE1,SERPINC1
Regulation of Actin-based Motility by Rho	3,1E00	6,59E-02	NaN	ACTR2,CFL1,PFN1,ARHGDIA,MYL12A,ARPC1B
FXR/RXR Activation	3,06E00	5,51E-02	NaN	C3,SERPINF1,CLU,APOH,APOE,AHSG,ALB
Hypoxia Signaling in the Cardiovascular System	2,96E00	7,69E-02	NaN	HSP90B1,LDHA,HSP90AB1,HSP90AA1,P4HB
Granulocyte Adhesion and Diapedesis	2,86E00	4,52E-02	NaN	HSPB1,GNAI2,MMP3,MMP2,EZR,MSN,MMP1,RDX
HIF1α Signaling	2,84E00	5,88E-02	NaN	MMP3,MMP2,LDHA,HSP90AA1,MMP1,LDHB
Clathrin-mediated Endocytosis Signaling	2,74E00	4,32E-02	NaN	ACTR2,ACTG1,HSPA8,CLU,CLTC,APOE,ARPC1B,ALB
Glucocorticoid Receptor Signaling	2,73E00	3,64E-02	NaN	A2M,TGFB1,HSPA8,HSP90B1,HSPA5,SERPINE1,HSP90AB1,HSP90AA1,MMP1,ANXA1
Pyruvate Fermentation to Lactate	2,68E00	3,33E-01	NaN	LDHA,LDHB
Pentose Phosphate Pathway (Non-oxidative Branch)	2,68E00	3,33E-01	NaN	TKT,TALDO1
Cell Cycle: G2/M DNA Damage Checkpoint Regulation	2,55E00	8,16E-02	NaN	YWHAQ,YWHAG,YWHAZ,YWHAB
Aspartate Degradation II	2,54E00	2,86E-01	NaN	MDH2,MDH1
Integrin Signaling	2,52E00	3,98E-02	NaN	ACTR2,TLN1,VCL,ACTG1,MYL12A,ACTN1,ACTN4,ARPC1B
Semaphorin Signaling in Neurons	2,43E00	7,55E-02	NaN	CFL1,NRP1,SEMA7A,DPYSL2
Airway Pathology in Chronic Obstructive Pulmonary Disease	2,42E00	2,5E-01	NaN	MMP2,MMP1
Sucrose Degradation V (Mammalian)	2,31E00	2,22E-01	NaN	TPI1,ALDOA
Myc Mediated Apoptosis Signaling	2,29E00	6,9E-02	NaN	YWHAQ,YWHAG,YWHAZ,YWHAB
Fcγ Receptor-mediated Phagocytosis in Macrophages and Monocytes	2,28E00	5,38E-02	NaN	ACTR2,TLN1,ACTG1,EZR,ARPC1B
ERK5 Signaling	2,16E00	6,35E-02	NaN	YWHAQ,YWHAG,YWHAZ,YWHAB
Paxillin Signaling	2,13E00	4,95E-02	NaN	TLN1,VCL,ACTG1,ACTN1,ACTN4
Inhibition of Angiogenesis by TSP1	2,11E00	8,82E-02	NaN	TGFB1,HSPG2,THBS1
Mitotic Roles of Polo-Like Kinase	2,09E00	6,06E-02	NaN	TGFB1,HSP90B1,HSP90AB1,HSP90AA1
Agrin Interactions at Neuromuscular Junction	2,02E00	5,8E-02	NaN	ACTG1,LAMB1,LAMC1,LAMA2
Antigen Presentation Pathway	2,01E00	8,11E-02	NaN	PSMB6,PDIA3,PSMB5
Gap Junction Signaling	1,95E00	3,87E-02	NaN	GNAI2,TUBA1A,ACTG1,TUBB3,PDIA3,TUBB4B
Acetyl-CoA Biosynthesis III (from Citrate)	1,92E00	1E00	NaN	ACLY
Chondroitin Sulfate Degradation (Metazoa)	1,87E00	1,33E-01	NaN	HEXB,HEXA
phagosome maturation	1,83E00	4,17E-02	NaN	TUBA1A,TUBB3,PRDX2,PRDX1,TUBB4B
Dermatan Sulfate Degradation (Metazoa)	1,81E00	1,25E-01	NaN	HEXB,HEXA
HIPPO signaling	1,7E00	4,65E-02	NaN	YWHAQ,YWHAG,YWHAZ,YWHAB
Bladder Cancer Signaling	1,68E00	4,6E-02	NaN	MMP3,MMP2,THBS1,MMP1
Neuregulin Signaling	1,67E00	4,55E-02	NaN	HSP90B1,DCN,HSP90AB1,HSP90AA1
NRF2-mediated Oxidative Stress Response	1,66E00	3,33E-02	NaN	SOD3,CCT7,ACTG1,PPIB,VCP,PRDX1
UDP-D-xylose and UDP-D-glucuronate Biosynthesis	1,62E00	5E-01	NaN	UGDH
EIF2 Signaling	1,61E00	3,24E-02	NaN	RPL12,UBA52,RPS18,EIF4A1,RPS14,RPSA
Death Receptor Signaling	1,6E00	4,35E-02	NaN	HSPB1,ACTG1,LMNA,SPTAN1
VEGF Signaling	1,6E00	4,35E-02	NaN	VCL,ACTG1,ACTN1,ACTN4
ERK/MAPK Signaling	1,59E00	3,21E-02	NaN	HSPB1,YWHAQ,YWHAG,TLN1,YWHAZ,YWHAB
Endoplasmic Reticulum Stress Pathway	1,59E00	9,52E-02	NaN	HSP90B1,HSPA5
Aryl Hydrocarbon Receptor Signaling	1,57E00	3,57E-02	NaN	HSPB1,TGFB1,HSP90B1,HSP90AB1,HSP90AA1
eNOS Signaling	1,55E00	3,52E-02	NaN	HSPA8,HSP90B1,HSPA5,HSP90AB1,HSP90AA1
TCA Cycle II (Eukaryotic)	1,51E00	8,7E-02	NaN	MDH2,MDH1
Glioma Invasiveness Signaling	1,51E00	5,26E-02	NaN	MMP2,TIMP1,TIMP2
Diphthamide Biosynthesis	1,45E00	3,33E-01	NaN	EEF2
Trehalose Degradation II (Trehalase)	1,45E00	3,33E-01	NaN	HK1
NADH Repair	1,45E00	3,33E-01	NaN	GAPDH
Protein Kinase A Signaling	1,36E00	2,33E-02	NaN	GNAI2,YWHAQ,YWHAG,TGFB1,MYL12A,FLNC,PDIA3,YWHAZ,YWHAB
Uracil Degradation II (Reductive)	1,33E00	2,5E-01	NaN	DPYSL2
Glutathione Redox Reactions II	1,33E00	2,5E-01	NaN	PDIA3
Thymine Degradation	1,33E00	2,5E-01	NaN	DPYSL2
Tight Junction Signaling	1,29E00	2,99E-02	NaN	TGFB1,VCL,ACTG1,MYH9,SPTAN1
Caveolar-mediated Endocytosis Signaling	1,27E00	4,23E-02	NaN	ACTG1,FLNC,ALB
Pentose Phosphate Pathway (Oxidative Branch)	1,23E00	2E-01	NaN	PGD
Dendritic Cell Maturation	1,2E00	2,82E-02	NaN	COL3A1,COL1A2,PDIA3,COL1A1,FSCN1
Oncostatin M Signaling	1,2E00	5,88E-02	NaN	MMP3,MMP1
PPARα/RXRα Activation	1,19E00	2,79E-02	NaN	TGFB1,HSP90B1,PDIA3,HSP90AB1,HSP90AA1
Rapoport-Luebering Glycolytic Shunt	1,16E00	1,67E-01	NaN	PGAM1
Cellular Effects of Sildenafil (Viagra)	1,15E00	3,1E-02	NaN	ACTG1,MYL12A,PDIA3,MYH9
Complement System	1,14E00	5,41E-02	NaN	C3,C1S
Prostate Cancer Signaling	1,12E00	3,66E-02	NaN	HSP90B1,HSP90AB1,HSP90AA1
IL-12 Signaling and Production in Macrophages	1,11E00	2,99E-02	NaN	TGFB1,CLU,APOE,ALB
Docosahexaenoic Acid (DHA) Signaling	1,1E00	5,13E-02	NaN	SERPINF1,APP
GDP-glucose Biosynthesis	1,09E00	1,43E-01	NaN	HK1
FAK Signaling	1,06E00	3,45E-02	NaN	TLN1,VCL,ACTG1
TGF-β Signaling	1,06E00	3,45E-02	NaN	INHBA,TGFB1,SERPINE1
Virus Entry via Endocytic Pathways	1,04E00	3,37E-02	NaN	ACTG1,CLTC,FLNC
Crosstalk between Dendritic Cells and Natural Killer Cells	1,04E00	3,37E-02	NaN	TLN1,ACTG1,FSCN1
Glucose and Glucose-1-phosphate Degradation	1,04E00	1,25E-01	NaN	HK1
Superoxide Radicals Degradation	1,04E00	1,25E-01	NaN	SOD3
Regulation of eIF4 and p70S6K Signaling	1E00	2,74E-02	NaN	RPS18,EIF4A1,RPS14,RPSA
UDP-N-acetyl-D-galactosamine Biosynthesis II	9,87E-01	1,11E-01	NaN	HK1
PPAR Signaling	9,84E-01	3,19E-02	NaN	HSP90B1,HSP90AB1,HSP90AA1
Calcium Transport I	9,44E-01	1E-01	NaN	ANXA5
p53 Signaling	9,44E-01	3,06E-02	NaN	SERPINE2,THBS1,TP53I3
Telomerase Signaling	9,34E-01	3,03E-02	NaN	HSP90B1,HSP90AB1,HSP90AA1
Nitric Oxide Signaling in the Cardiovascular System	9,25E-01	3E-02	NaN	HSP90B1,HSP90AB1,HSP90AA1
Heparan Sulfate Biosynthesis (Late Stages)	9,18E-01	4E-02	NaN	EXT1,EXT2
Role of Osteoblasts, Osteoclasts and Chondrocytes in Rheumatoid Arthritis	9,06E-01	2,28E-02	NaN	MMP3,TGFB1,BMP1,COL1A1,MMP1
Rac Signaling	8,88E-01	2,88E-02	NaN	ACTR2,CFL1,ARPC1B
Cardiac Hypertrophy Signaling	8,82E-01	2,24E-02	NaN	HSPB1,GNAI2,TGFB1,MYL12A,PDIA3
fMLP Signaling in Neutrophils	8,52E-01	2,78E-02	NaN	GNAI2,ACTR2,ARPC1B
Cdc42 Signaling	8,49E-01	2,4E-02	NaN	ACTR2,CFL1,MYL12A,ARPC1B
Actin Nucleation by ARP-WASP Complex	8,38E-01	3,57E-02	NaN	ACTR2,ARPC1B
Guanosine Nucleotides Degradation III	8,38E-01	7,69E-02	NaN	NT5E
Role of Tissue Factor in Cancer	8,36E-01	2,73E-02	NaN	CFL1,MMP1,P4HB
Heparan Sulfate Biosynthesis	8,26E-01	3,51E-02	NaN	EXT1,EXT2
DNA Double-Strand Break Repair by Non-Homologous End Joining	8,08E-01	7,14E-02	NaN	XRCC6
Urate Biosynthesis/Inosine 5'-phosphate Degradation	8,08E-01	7,14E-02	NaN	NT5E
Colanic Acid Building Blocks Biosynthesis	8,08E-01	7,14E-02	NaN	UGDH
Ephrin Receptor Signaling	8,04E-01	2,3E-02	NaN	GNAI2,ACTR2,CFL1,ARPC1B
IL-6 Signaling	7,87E-01	2,59E-02	NaN	A2M,HSPB1,COL1A1
γ-glutamyl Cycle	7,81E-01	6,67E-02	NaN	ANPEP
PCP pathway	7,58E-01	3,17E-02	NaN	HSPB1,PFN1
Extrinsic Prothrombin Activation Pathway	7,55E-01	6,25E-02	NaN	SERPINC1
RAN Signaling	7,31E-01	5,88E-02	NaN	KPNB1
Adenosine Nucleotides Degradation II	7,31E-01	5,88E-02	NaN	NT5E
mTOR Signaling	7,21E-01	2,13E-02	NaN	RPS18,EIF4A1,RPS14,RPSA
Role of Pattern Recognition Receptors in Recognition of Bacteria and Viruses	7,15E-01	2,38E-02	NaN	C3,TGFB1,PTX3
Breast Cancer Regulation by Stathmin1	7,05E-01	2,09E-02	NaN	GNAI2,TUBA1A,TUBB3,TUBB4B
Growth Hormone Signaling	6,97E-01	2,9E-02	NaN	A2M,IGFBP3
Melatonin Signaling	6,88E-01	2,86E-02	NaN	GNAI2,PDIA3
Chemokine Signaling	6,79E-01	2,82E-02	NaN	GNAI2,CFL1
GPCR-Mediated Integration of Enteroendocrine Signaling Exemplified by an L Cell	6,79E-01	2,82E-02	NaN	GNAI2,PDIA3
IL-17 Signaling	6,7E-01	2,78E-02	NaN	MMP3,TIMP1
Purine Nucleotides Degradation II (Aerobic)	6,68E-01	5E-02	NaN	NT5E
Human Embryonic Stem Cell Pluripotency	6,62E-01	2,24E-02	NaN	INHBA,TGFB1,BMP1
Ephrin B Signaling	6,61E-01	2,74E-02	NaN	GNAI2,CFL1
Maturity Onset Diabetes of Young (MODY) Signaling	6,32E-01	4,55E-02	NaN	GAPDH
VDR/RXR Activation	6,19E-01	2,56E-02	NaN	IGFBP3,IGFBP6
Reelin Signaling in Neurons	6,11E-01	2,53E-02	NaN	APP,APOE
GPCR-Mediated Nutrient Sensing in Enteroendocrine Cells	5,73E-01	2,38E-02	NaN	GNAI2,PDIA3
Lipid Antigen Presentation by CD1	5,69E-01	3,85E-02	NaN	PDIA3
Antiproliferative Role of TOB in T Cell Signaling	5,69E-01	3,85E-02	NaN	TGFB1
NAD Salvage Pathway II	5,69E-01	3,85E-02	NaN	NT5E
TR/RXR Activation	5,66E-01	2,35E-02	NaN	COL6A3,ENO1
Role of Macrophages, Fibroblasts and Endothelial Cells in Rheumatoid Arthritis	5,48E-01	1,69E-02	NaN	MMP3,FN1,TGFB1,PDIA3,MMP1
PAK Signaling	5,39E-01	2,25E-02	NaN	CFL1,MYL12A
Apoptosis Signaling	5,39E-01	2,25E-02	NaN	LMNA,SPTAN1
Glutathione-mediated Detoxification	5,29E-01	3,45E-02	NaN	ANPEP
Huntington's Disease Signaling	5,29E-01	1,75E-02	NaN	HSPA8,CLTC,HSPA5,ATP5B
Factors Promoting Cardiogenesis in Vertebrates	5,19E-01	2,17E-02	NaN	TGFB1,BMP1
Role of p14/p19ARF in Tumor Suppression	5,17E-01	3,33E-02	NaN	NPM1
Colorectal Cancer Metastasis Signaling	5,02E-01	1,69E-02	NaN	MMP3,TGFB1,MMP2,MMP1
CDK5 Signaling	4,77E-01	2,02E-02	NaN	LAMB1,LAMC1
Mitochondrial Dysfunction	4,72E-01	1,75E-02	NaN	APP,PRDX3,ATP5B
IL-17A Signaling in Fibroblasts	4,62E-01	2,86E-02	NaN	MMP1
Thyroid Hormone Metabolism II (via Conjugation and/or Degradation)	4,62E-01	2,86E-02	NaN	EXT2
Role of NFAT in Cardiac Hypertrophy	4,39E-01	1,68E-02	NaN	GNAI2,TGFB1,PDIA3
Production of Nitric Oxide and Reactive Oxygen Species in Macrophages	4,36E-01	1,67E-02	NaN	CLU,APOE,ALB
tRNA Charging	4,25E-01	2,56E-02	NaN	GARS
Sphingosine-1-phosphate Signaling	4,24E-01	1,83E-02	NaN	GNAI2,PDIA3
phagosome formation	4,24E-01	1,83E-02	NaN	FN1,PDIA3
IL-8 Signaling	4,2E-01	1,63E-02	NaN	GNAI2,MMP2,LASP1
Regulation of the Epithelial-Mesenchymal Transition Pathway	4,2E-01	1,63E-02	NaN	LOX,TGFB1,MMP2
Neuroprotective Role of THOP1 in Alzheimer's Disease	4,17E-01	2,5E-02	NaN	APP
Corticotropin Releasing Hormone Signaling	4,14E-01	1,8E-02	NaN	GNAI2,KRT1
Androgen Signaling	4,14E-01	1,8E-02	NaN	GNAI2,HSP90AA1
Mechanisms of Viral Exit from Host Cells	4,08E-01	2,44E-02	NaN	ACTG1
RAR Activation	3,99E-01	1,58E-02	NaN	TGFB1,IGFBP3,MMP1
Thrombin Signaling	3,95E-01	1,57E-02	NaN	GNAI2,MYL12A,PDIA3
Xenobiotic Metabolism Signaling	3,88E-01	1,48E-02	NaN	SOD3,HSP90B1,HSP90AB1,HSP90AA1
CCR3 Signaling in Eosinophils	3,87E-01	1,71E-02	NaN	GNAI2,CFL1
p38 MAPK Signaling	3,87E-01	1,71E-02	NaN	HSPB1,TGFB1
CD28 Signaling in T Helper Cells	3,82E-01	1,69E-02	NaN	ACTR2,ARPC1B
P2Y Purigenic Receptor Signaling Pathway	3,78E-01	1,68E-02	NaN	GNAI2,PDIA3
HMGB1 Signaling	3,74E-01	1,67E-02	NaN	TGFB1,SERPINE1
MSP-RON Signaling Pathway	3,7E-01	2,17E-02	NaN	ACTG1
Ephrin A Signaling	3,56E-01	2,08E-02	NaN	CFL1
PI3K Signaling in B Lymphocytes	3,41E-01	1,56E-02	NaN	C3,PDIA3
Amyloid Processing	3,37E-01	1,96E-02	NaN	APP
Role of IL-17A in Arthritis	3,19E-01	1,85E-02	NaN	MMP1
Nicotine Degradation III	3,19E-01	1,85E-02	NaN	EXT2
Role of Cytokines in Mediating Communication between Immune Cells	3,14E-01	1,82E-02	NaN	TGFB1
Wnt/Ca+ pathway	3,08E-01	1,79E-02	NaN	PDIA3
Melatonin Degradation I	3,03E-01	1,75E-02	NaN	EXT2
Phospholipases	2,98E-01	1,72E-02	NaN	PDIA3
Synaptic Long Term Depression	2,92E-01	1,41E-02	NaN	GNAI2,PDIA3
Superpathway of Melatonin Degradation	2,78E-01	1,61E-02	NaN	EXT2
Activation of IRF by Cytosolic Pattern Recognition Receptors	2,73E-01	1,59E-02	NaN	PPIB
Nicotine Degradation II	2,73E-01	1,59E-02	NaN	EXT2
Role of PI3K/AKT Signaling in the Pathogenesis of Influenza	2,69E-01	1,56E-02	NaN	GNAI2
Cell Cycle: G1/S Checkpoint Regulation	2,69E-01	1,56E-02	NaN	TGFB1
CXCR4 Signaling	2,62E-01	1,32E-02	NaN	GNAI2,MYL12A
Serotonin Degradation	2,56E-01	1,49E-02	NaN	EXT2
Macropinocytosis Signaling	2,51E-01	1,47E-02	NaN	ACTN4
Tec Kinase Signaling	2,49E-01	1,27E-02	NaN	GNAI2,ACTG1
CCR5 Signaling in Macrophages	2,47E-01	1,45E-02	NaN	GNAI2
T Helper Cell Differentiation	2,39E-01	1,41E-02	NaN	TGFB1
Renal Cell Carcinoma Signaling	2,39E-01	1,41E-02	NaN	TGFB1
PEDF Signaling	2,39E-01	1,41E-02	NaN	SERPINF1
Dopamine-DARPP32 Feedback in cAMP Signaling	2,38E-01	1,24E-02	NaN	GNAI2,PDIA3
Basal Cell Carcinoma Signaling	2,36E-01	1,39E-02	NaN	BMP1
Leptin Signaling in Obesity	2,28E-01	1,35E-02	NaN	PDIA3
HER-2 Signaling in Breast Cancer	2,21E-01	1,32E-02	NaN	MMP2
VEGF Family Ligand-Receptor Interactions	2,21E-01	1,32E-02	NaN	NRP1
BMP signaling pathway	2,21E-01	1,32E-02	NaN	BMP1
Cyclins and Cell Cycle Regulation	2,14E-01	1,28E-02	NaN	TGFB1
Regulation of IL-2 Expression in Activated and Anergic T Lymphocytes	2,11E-01	1,27E-02	NaN	TGFB1
