# Supplementary material
Source: publisher figshare collection journal article supplement (https://tandf.figshare.com/articles/dataset/_/3503471)
Supplement: Supplementary file 3 [file 1 › 2016CC7185R-s08.xls]

## Sheet: MUSE
© 2000-2016 QIAGEN. All rights reserved.
Upstream Regulator	Molecule Type	p-value of overlap	Target molecules in dataset	Mechanistic Network
NPC1	transporter	5,55E-03	CTSB,CTSD,S100A8
AQP11	transporter	4,91E-02	TIMP1
ABCB4	transporter	1,95E-07	COL1A1,COL1A2,MMP2,SERPINE1,SPARC,TIMP1
SRI	transporter	8,36E-03	HSPA5
SLC13A1	transporter	7,47E-03	ACTG1,HSPA5,HSPA8,ITIH3
SCARB1	transporter	2,93E-02	APOB,APOD
ALB	transporter	4,95E-04	ALB,COL1A1,HSPA5,IGHG1	80 (13)
APOB	transporter	2,43E-02	APOB,PSMA7
GJA1	transporter	2,93E-02	THBS1,VIM
BSG	transporter	2,59E-02	MMP2,VIM
LCN2	transporter	7,25E-06	ACTN1,ARG1,MMP2,MSN,TAGLN2,VIM	47 (5)
ATP2B2	transporter	1,02E-03	CALR,HSPA5
MTTP	transporter	3,10E-02	APOB,HSPA5
BCL2	transporter	1,99E-03	COL2A1,IGFBP6,MMP2,TIMP1,TIMP2	90 (19)
LDLR	transporter	1,10E-04	APOB,BGN,HSPA5,HSPG2,MMP2,PSMA7	72 (11)
SYVN1	transporter	5,43E-03	CALM1 (includes others),LDHB,LGALS3BP,PFN1,RPL18
BAX	transporter	9,41E-03	CTSB,CTSD,TIMP1
SLC2A1	transporter	4,66E-05	FN1,MMP2,SERPINE1	103 (16)
FOLR1	transporter	1,40E-04	ACTN4,CAT,LYZ,PFN1,TAGLN2,TPI1
AP2A1	transporter	3,30E-02	TALDO1
APOE	transporter	4,94E-11	APOB,APOD,BGN,CALR,CAT,COL1A1,CTSB,CTSD,HSPG2,IGFBP6,MMP2,PTX3,S100A8,S100A9,SERPINE1,TIMP1	110 (18)
VLDLR	transporter	4,13E-04	APOB,SERPINE1
SFTPA1	transporter	2,42E-02	COL1A1,LGALS7/LGALS7B,SERPINE1
LASP1	transporter	3,30E-02	VIM
COMMD1	transporter	6,85E-04	ALDOA,KRT19,LDHA	90 (7)
SLC12A6	transporter	2,49E-02	VIM
KDELR1	transporter	8,36E-03	HSPA5
ATP2A1	transporter	4,13E-04	CALR,HSPA5	33 (4)
SLC37A4	transporter	3,30E-02	HSPA5
ABCA1	transporter	4,21E-03	ANXA1,APOB,HSPA5	68 (9)
STX2	transporter	4,91E-02	MMP2
STAU1	transporter	1,55E-04	CASP14,KRT1,KRT10
SLC6A2	transporter	4,91E-02	CLSTN1
HNRNPU	transporter	6,80E-03	GAPDH,HBB
ABCB7	transporter	4,11E-02	TXN
SLC5A5	transporter	8,36E-03	HBB
HBB	transporter	2,99E-03	COL1A2,SERPINE1
SLC25A13	transporter	4,67E-02	ANXA2,PSAT1,SERPINE2
PLN	transporter	2,08E-08	AHSG,ALDOA,ANXA2,CALU,ENO1,HSP90B1,TPI1,VIM
AZGP1	transporter	2,54E-05	AZGP1,DSP,KRT19,VIM
ZFYVE16	transporter	1,67E-02	SERPINE1
IGF1R	transmembrane receptor	6,85E-10	ACTN4,ALDOA,CALU,COL1A1,COL3A1,COL4A2,CYCS,HSPA5,IGFBP3,KRT19,KRT5,KRT6B,NME1,TGFBI,TXN	49 (7)
SEMA7A	transmembrane receptor	2,11E-08	COL1A1,COL1A2,COL3A1,CTSB,FN1,TIMP1
TNFRSF1B	transmembrane receptor	2,33E-02	MMP2,SERPINE1,TIMP1
DAG1	transmembrane receptor	1,08E-02	LAMB1,LAMC1
ITGB1	transmembrane receptor	2,40E-09	COL1A1,COL1A2,FLNA,LAMB1,LAMC1,MMP2,SERPINE1,THBS1,TIMP2,VIM	107 (19)
SFRP1	transmembrane receptor	1,62E-03	FN1,MMP2,VIM	113 (19)
IL10RA	transmembrane receptor	5,86E-05	C3,FN1,FSTL1,HSPA8,LUM,PCOLCE,POSTN,SERPINB6,SPARC,TGM3,TTR
CR1	transmembrane receptor	4,91E-02	C3
F3	transmembrane receptor	1,98E-04	ARG1,LAMB1,MMP2,SERPINC1,SERPINE1
AGER	transmembrane receptor	2,83E-04	ARG1,MMP2,S100A8,S100A9,SERPINE1	97 (17)
SFRP2	transmembrane receptor	3,30E-02	MMP2
SFRP4	transmembrane receptor	3,64E-03	FN1,VIM
LRPAP1	transmembrane receptor	6,80E-03	MMP2,SERPINE1	110 (22)
PLAUR	transmembrane receptor	3,09E-03	CTSB,MMP2,VIM	120 (19)
TNFRSF11A	transmembrane receptor	9,74E-03	AKAP13,FN1
CAV1	transmembrane receptor	8,89E-05	AFP,ARG1,HSPA8,KRT19,KRT4,KRT6B,THBS1
IL6R	transmembrane receptor	2,38E-06	A2M,COL1A1,COL1A2,COL2A1,FN1,MMP2,TIMP1	113 (19)
HFE	transmembrane receptor	5,05E-04	B2M,HSP90B1,HSPA5
UTRN	transmembrane receptor	4,11E-02	ACTG1
CSF3R	transmembrane receptor	5,10E-03	LTF,LYZ
FAS	transmembrane receptor	5,12E-07	ANXA2,BGN,COL1A1,COL1A2,COL3A1,COL4A2,COL5A1,COL6A1,COL6A3,LUM,PTX3,SERPINE1,TAGLN2,TGM3,TPM1	81 (12)
LEPR	transmembrane receptor	7,41E-05	ANXA5,APOB,COL1A1,FN1,IGFBP3,MMP2,SERPINE1,TIMP1	98 (20)
ENG	transmembrane receptor	2,43E-02	FN1,SERPINE1
ITGB3	transmembrane receptor	8,83E-08	COL1A1,COL1A2,FN1,HSP90B1,MMP2,SERPINE1,SPARC,TIMP1	106 (18)
LRP1	transmembrane receptor	8,29E-05	COL3A1,MMP2,SERPINF1,SERPING1
IL17RA	transmembrane receptor	1,98E-03	S100A8,S100A9,TIMP1	61 (8)
IL6ST	transmembrane receptor	1,15E-02	A2M,ALB,LTF
EDNRA	transmembrane receptor	1,09E-07	COL1A1,COL3A1,MMP2,TIMP1,TIMP2
CD36	transmembrane receptor	6,71E-03	APOB,ARG1,HSPA5	68 (9)
MUC1	transmembrane receptor	4,53E-03	ARG1,CAT,VIM	58 (5)
CD28	transmembrane receptor	2,63E-05	ANXA1,CYCS,GAPDH,HSPA8,IGFBP6,MMP2,PGAM1,PNP,PRDX4,PSMA5,PSMA6,THBS1	38 (5)
EIF4G2	translation regulator	6,61E-05	CTSD,KRT19,SERPINE2
EIF3I	translation regulator	8,36E-03	SERPINE1
IGF2BP1	translation regulator	1,11E-08	COL1A1,COL1A2,COL5A1,COL6A2,COL6A3,LUM
EEF1D	translation regulator	2,49E-02	COL2A1
ELF3	transcription regulator	9,55E-05	COL2A1,FN1,KRT4,LYZ	61 (7)
ZNF282	transcription regulator	3,30E-02	CTSD
ZNF219	transcription regulator	2,49E-02	COL2A1
MKL2	transcription regulator	6,99E-05	FLNA,LTF,S100A8,S100A9,TAGLN,VCL
ZNF496	transcription regulator	8,36E-03	HBB
ATF6B	transcription regulator	3,30E-02	HSPA5
WWTR1	transcription regulator	1,98E-03	COL1A1,FN1,SERPINE1	24 (6)
LMX1B	transcription regulator	3,64E-03	COL2A1,PTX3
FOXK2	transcription regulator	4,11E-02	SERPINE1
SPDEF	transcription regulator	5,33E-09	COL1A1,COL4A2,COL5A1,COL6A1,COL6A2,COL6A3,LAMC1,SERPINE1,VIM
MKX	transcription regulator	6,84E-04	COL1A1,COL1A2
ZNF24	transcription regulator	3,30E-02	MMP2
NSD1	transcription regulator	4,44E-06	CTSD,HBB,KRT10,KRT2
GLIS2	transcription regulator	3,04E-07	C3,COL1A1,SERPINE1,SPARC,VIM	21 (3)
HMGA1	transcription regulator	4,00E-08	B2M,COL1A1,COL1A2,COL4A2,FSTL1,IGFBP3,IGFBP7,KRT10,LAMB1,SPARC,TAGLN	49 (7)
DMRT1	transcription regulator	2,68E-02	IGFBP3,IGFBP6,VCL
CCND1	transcription regulator	7,36E-03	AZGP1,COL1A1,HSPA8,KRT14,KRT4,MMP2,NT5E
STAT3	transcription regulator	2,39E-13	A2M,AHSG,APEX1,ARG1,CAT,CHI3L1,COL1A1,COL1A2,COL3A1,COL5A1,CTSB,FN1,HBB,KRT17,LTF,LYZ,MMP2,PDIA4,PSMB5,SERPINB3,SERPINE1,SERPINE2,THBS1,TIMP1,VIM	108 (18)
E2F1	transcription regulator	7,81E-07	CALM1 (includes others),CALR,COL2A1,CTSB,GM2A,HSP90B1,HSPA8,KRT1,KRT10,KRT14,MDH1,PSAT1,SERPINE1,THBS1,VIM,YWHAE
SRF	transcription regulator	1,36E-03	A2M,FLNA,HSPG2,LTF,PPIA,S100A8,S100A9,TAGLN,VCL	10 (3)
LPXN	transcription regulator	2,49E-02	TAGLN
SOX7	transcription regulator	4,61E-02	KRT14,KRT17
SOX5	transcription regulator	5,10E-03	COL2A1,HSPG2
TFAP2A	transcription regulator	9,18E-06	ANXA1,KRT14,KRT5,MMP2,PRDX1,RPLP0,TPM1
STAT1	transcription regulator	2,51E-02	A2M,ARG1,B2M,C3,SERPINB3,SERPING1
HAND2	transcription regulator	7,48E-04	COL1A1,COL1A2,COL3A1,TPM1
HDAC10	transcription regulator	3,30E-02	MMP2
NFATC4	transcription regulator	1,62E-03	COL1A1,COL3A1,CTSD
TFEC	transcription regulator	4,28E-04	COL6A3,PSMA6,S100A9
SOX2	transcription regulator	1,58E-02	ALB,COL1A1,DSP,KRT14,KRT17,KRT19,VIM
HOXB8	transcription regulator	2,49E-02	TAGLN
VHL	transcription regulator	6,23E-04	CFL1,FN1,LMNA,SPARC,TAGLN,VIM	76 (11)
HTATIP2	transcription regulator	1,08E-02	MMP2,SPARC
NCOR1	transcription regulator	4,71E-04	AFP,AZGP1,IGFBP3,LYZ,SERPINF1
SMAD2	transcription regulator	5,68E-05	BGN,COL2A1,MMP2,SERPINE1,THBS1,TPM1	99 (15)
MKL1	transcription regulator	3,10E-05	DSG1,FLNA,LTF,S100A8,S100A9,TAGLN,VCL	10 (3)
EPAS1	transcription regulator	1,84E-04	ARG1,CAT,ENO1,FN1,HSPA5,IGFBP3,LDHA,SERPINE1	14 (2)
REL	transcription regulator	4,10E-02	B2M,FN1,IGHG1,JUP,VIM
FOXA3	transcription regulator	4,02E-02	CYCS,TTR
USF1	transcription regulator	4,71E-04	B2M,CAT,CHI3L1,IGFBP3,SERPINE1
SOX4	transcription regulator	4,13E-03	FN1,IGKC,LYZ,PNP,SERPINE2,VIM
MDM2	transcription regulator	1,92E-03	IGFBP6,KRT14,LYZ,TIMP1
JUNB	transcription regulator	8,29E-06	C3,COL1A1,COL1A2,FN1,MMP2,SERPINE1,TIMP1,YWHAG	91 (14)
SMAD1	transcription regulator	4,53E-03	COL1A1,COL1A2,COL2A1	83 (15)
BCL11A	transcription regulator	4,11E-02	HBB
AIRE	transcription regulator	8,93E-03	ITIH3,LTF,S100A9
HLTF	transcription regulator	6,95E-05	HBB,SERPINE1
CIITA	transcription regulator	2,84E-03	B2M,COL1A1,COL1A2	26 (6)
NOTCH1	transcription regulator	5,47E-04	COL1A1,COL1A2,IGFBP3,KRT14,MMP2,PDIA3,SERPINE1,TAGLN	115 (20)
ZFP36	transcription regulator	7,99E-03	LTF,S100A8,S100A9
HOXA10	transcription regulator	2,80E-06	COL3A1,CSTA,FN1,IGFBP3,KRT4,LTF,LYZ,MSN,P4HB,YWHAG
TAF4	transcription regulator	1,10E-04	KRT16,KRT6B,LUM,MMP2,TGM3,THBS1
ETV4	transcription regulator	1,25E-04	FN1,JUP,KRT5,VIM
POU2F3	transcription regulator	4,13E-04	KRT10,KRT14
HIF1A	transcription regulator	3,78E-11	AFP,ALDOA,BGN,CTSD,ENO1,FN1,GAPDH,GPI,HSPA5,IGFBP3,JUP,KRT14,KRT19,LDHA,MMP2,NT5E,PPIA,SERPINE1,TPI1,VIM	111 (12)
DLX4	transcription regulator	4,91E-02	HBB
SIM2	transcription regulator	1,08E-02	MMP2,TIMP2
ZNF148	transcription regulator	5,10E-03	FN1,VIM
MYOCD	transcription regulator	4,10E-06	COL1A1,COL1A2,COL2A1,COL3A1,FN1,TAGLN,TPM1
CEBPE	transcription regulator	7,99E-03	LTF,LYZ,MMP2
ID1	transcription regulator	1,04E-02	FN1,MMP2,VIM
CEBPA	transcription regulator	8,33E-13	A2M,ALB,ANXA1,APOB,ARG1,C3,CHI3L1,COL1A1,COL1A2,CYCS,GAPDH,HSPA5,IGFBP3,KRT14,KRT17,LTF,PTX3,S100A8,S100A9,SERPINE1,SERPINF1,THBS1,VCL	117 (15)
POU2F1	transcription regulator	3,40E-03	A2M,APEX1,IGKC,PRDX2,SERPING1
TFAP4	transcription regulator	3,82E-02	FN1,VIM
DLX1	transcription regulator	3,30E-02	SERPINE1
TSC22D3	transcription regulator	3,27E-02	ANXA1,COL1A1
RUNX1	transcription regulator	3,09E-06	ALB,CHI3L1,IGFBP3,JUP,KRT1,S100A9,SERPINE1,TIMP1	57 (6)
HMGN1	transcription regulator	2,28E-02	AZGP1,TTR
SP100	transcription regulator	1,08E-02	HBB,HSPA8
GLI1	transcription regulator	6,29E-06	COL1A1,COL2A1,IGFBP6,IGFBP7,JUP,KRT19,LMNA,MMP2,S100A9,VIM	54 (5)
SMAD7	transcription regulator	1,25E-13	BGN,COL1A1,COL1A2,COL2A1,COL3A1,COL6A1,COL6A3,FN1,MMP2,NID2,SERPINE1,TAGLN,TGFBI,TIMP1,TXN	82 (16)
IRF4	transcription regulator	7,53E-03	ARG1,B2M,HSPA8,PPIB,PSMA2
ARID5B	transcription regulator	1,67E-02	TAGLN
NFYB	transcription regulator	2,47E-02	COL1A1,COL1A2,GAPDH,PDIA4,TPM1,VIM
SP1	transcription regulator	1,09E-10	CAT,CHI3L1,COL1A1,COL1A2,COL2A1,CTSD,FLNA,FN1,GNAS,GSS,HBB,HSPA5,IGFBP3,KRT16,KRT19,KRT4,MMP2,SERPINE1,SPARC,TAGLN,TIMP1,TIMP2,VIM	84 (15)
FOXP3	transcription regulator	6,14E-03	ANXA1,MMP2,NT5E,TTR
FLI1	transcription regulator	8,04E-05	COL1A1,COL1A2,HBB,HSPA8,RPL18
SIM1	transcription regulator	2,10E-03	COL12A1,ITIH3,KRT5,LTF,PFN1,POSTN,SERPINA5
CTBP2	transcription regulator	7,73E-03	HBB,JUP
HOXD10	transcription regulator	1,71E-04	NME1,RPSA,SERPINE1,TIMP1,TIMP2
SPI1	transcription regulator	1,47E-03	CHI3L1,HSPA8,LTF,LYZ,MMP2,RPL18,VIM	62 (7)
GATA4	transcription regulator	1,25E-08	COL1A1,COL1A2,COL3A1,HSPA5,KRT14,KRT17,POSTN,TAGLN,TGFBI,TIMP1,TPM1,VIM
APBB1	transcription regulator	5,92E-03	TAGLN,TPM1
TWIST1	transcription regulator	3,70E-10	APOD,CHI3L1,COL1A1,COL2A1,COL6A1,FN1,LMNA,MFGE8,MMP2,NT5E,PCOLCE,TGFBI,VIM
NACA	transcription regulator	3,30E-02	COL1A1
SOX6	transcription regulator	3,64E-03	COL2A1,HSPG2
NEUROG1	transcription regulator	1,73E-05	C3,COL3A1,DSP,FN1,SERPINF1,THBS1	16 (3)
RFXAP	transcription regulator	2,41E-03	B2M,COL1A2	4 (3)
NOTCH3	transcription regulator	7,55E-08	ACTN1,APOD,COL5A1,FN1,PTX3,SPARC,TAGLN
JUN	transcription regulator	9,67E-14	A2M,AFP,ANXA1,ANXA2,APEX1,COL1A1,COL1A2,CSTA,CYCS,FN1,IGFBP3,IGFBP7,KRT16,LMNA,MMP2,PRDX1,PTX3,SERPINE1,SPARC,THBS1,TIMP1,TXN,VIM,YWHAG	104 (20)
XBP1	transcription regulator	1,22E-07	AFP,CALR,CAT,FN1,HSP90B1,HSPA5,PDIA3,PDIA4,PPIB,RCN3,TTR,TXN	36 (4)
SREBF1	transcription regulator	1,98E-02	COL6A1,FN1,HSPA5,RPLP0,SERPINE1
TIAL1	transcription regulator	2,49E-02	HBB
TWIST2	transcription regulator	1,02E-03	FN1,POSTN,VIM
ARNT	transcription regulator	5,43E-07	ALDOA,CTSD,ENO1,GAPDH,GPI,LDHA,SERPINE1,TPI1,VIM	90 (6)
CEBPB	transcription regulator	3,82E-08	ALB,APOB,ARG1,C3,COL1A1,COL1A2,GNAS,HBB,HSPA8,IGFBP3,IGKC,KRT6B,LAMC1,PSMA3,PSMA6,SERPINE1,VIM	88 (17)
HDAC3	transcription regulator	4,17E-04	COL1A2,JUP,SERPINE1,TAGLN,VIM	98 (14)
SMARCD3	transcription regulator	1,20E-02	COL1A1,COL2A1
NKX2-1	transcription regulator	3,40E-03	IGFBP6,LYZ,MMP2,QSOX1,SERPINE1,THBS1
FBXW7	transcription regulator	1,84E-02	COL1A1,SERPINE1
POU5F1	transcription regulator	3,91E-02	ALB,CASP14,DSP,KRT14,KRT17,VIM
ZEB1	transcription regulator	3,82E-02	KRT19,SERPINE1
YBX1	transcription regulator	8,80E-05	COL1A1,COL1A2,HBB,IGFBP3,MMP2
TSC22D1	transcription regulator	1,42E-03	FN1,SERPINE1	43 (12)
STAT6	transcription regulator	1,28E-05	ARG1,COL1A1,COL1A2,CTSB,IGHG1,LGALS3BP,MMP2,SERPINB3,SERPINB6,SERPINE1,SERPINF1	93 (15)
TFEB	transcription regulator	3,45E-02	CTSB,CTSD
PPARGC1B	transcription regulator	7,99E-03	C3,CYCS,ENO1	9 (3)
NFE2	transcription regulator	7,88E-04	CAT,HBB,TXN	10 (2)
JUND	transcription regulator	1,72E-02	COL6A1,CSTA,TIMP1
ETV5	transcription regulator	1,49E-06	FN1,KRT13,KRT16,KRT19,KRT80,MMP2
CDKN2A	transcription regulator	4,09E-04	A2M,C3,GNAS,MMP2,PSMA5,PTX3,SERPINE1,TPM1,VIM	102 (16)
ZEB2	transcription regulator	1,98E-02	KRT19,VIM
HEXIM1	transcription regulator	1,16E-03	ANXA1,COL1A1,VIM	31 (5)
KLF2	transcription regulator	3,02E-02	HBB,SERPINE1,THBS1,TIMP1
HOXC8	transcription regulator	2,18E-03	KRT19,SERPINF1,TAGLN
NFIX	transcription regulator	7,88E-04	CHI3L1,POSTN,SERPINE1
GLI2	transcription regulator	1,28E-03	CSTA,KRT1,KRT10,KRT17,VIM
PPARGC1A	transcription regulator	4,15E-04	C3,CALM1 (includes others),CAT,COL2A1,COMP,CYCS,LDHA,PGAM1	57 (7)
KLF4	transcription regulator	3,11E-06	ALB,COL1A1,DSP,FN1,KRT13,KRT14,KRT17,KRT19,SERPINE1,TAGLN,VIM	76 (14)
NCOA3	transcription regulator	2,15E-03	IGFBP3,LDHA,PSMA2,TAGLN
PIAS4	transcription regulator	4,34E-03	ALB,SERPINE1	42 (7)
FOXM1	transcription regulator	1,83E-03	ANXA1,LAMA4,LDHA,MMP2,VIM	45 (5)
HDAC6	transcription regulator	1,56E-05	COL1A1,SERPINE1,TAGLN,TGFBI,VIM	77 (9)
ATF6	transcription regulator	4,53E-03	CALR,HSP90B1,HSPA5	59 (9)
TGFB1I1	transcription regulator	3,59E-04	FN1,KRT19,SERPINE1	35 (3)
PML	transcription regulator	8,35E-07	ACTG1,CAT,CFL1,HBB,JUP,LYZ,PRDX1,TXN,YWHAG
NFYC	transcription regulator	3,91E-03	ALB,COL1A1,COL1A2
BCL6	transcription regulator	2,88E-02	A2M,COL1A1,COL2A1,SERPINE1
TP73	transcription regulator	2,75E-10	AFP,C3,COL1A1,CTSD,IGFBP3,KRT10,LYZ,MMP2,SERPINA5,SERPINB6,SERPINE1,SERPINE2,SERPINF1,SERPING1,THBS1,TIMP1,TTR,YWHAB	117 (15)
MECP2	transcription regulator	2,42E-05	ANXA1,HSPA5,IGFBP3,LMNA,VIM,YWHAB,YWHAZ
HR	transcription regulator	4,81E-02	CASP14,COL6A1
ONECUT1	transcription regulator	8,92E-03	AFP,AKAP13,GSS,MDH1,PSMB1,SERPINB8,TTR
NFE2L2	transcription regulator	3,39E-20	ACTG1,ALDOA,CAT,COL1A1,COL3A1,COL4A2,CTSD,FN1,GSS,HSP90B1,LMNA,PDIA3,PDIA4,PPIB,PRDX1,PSAT1,PSMA4,PSMA5,PSMA6,PSMA7,PSMB1,PSMB2,PSMB4,PSMB5,PSMB6,RPL18,RPLP0,TPI1,TTR,TXN
HNF4A	transcription regulator	6,70E-08	ACTN1,AFP,AHSG,AKAP13,ANXA5,APOB,C3,C4A/C4B,CHI3L1,CTSB,CTSZ,FLNA,GAPDH,GSS,HSP90B1,HSPA5,ITIH3,KRT10,KRT14,KRT17,MDH1,NME1,NUCB1,PNP,PSAT1,PSMA2,PSMA3,PSMA5,PSMB1,PSMB5,PZP,RPL18,S100A9,SEMA7A,SERPINA5,SERPINB3,SERPINB8,SERPINE1,TAGLN2,TTR,YWHAB	47 (2)
FOXO1	transcription regulator	1,95E-03	A2M,CASP14,CYCS,GPI,HSPA5,PSMB6,SERPINE1,THBS1,TKT	83 (7)
SP3	transcription regulator	2,12E-09	CHI3L1,COL1A1,COL1A2,COL2A1,HSPA5,IGFBP3,KRT16,MMP2,SERPINE1,SPARC,TAGLN,TIMP1,TIMP2,VIM	39 (4)
FOXA2	transcription regulator	1,73E-05	A2M,AFP,ALB,APOB,C3,CHI3L1,LYZ,TAGLN,TTR	61 (8)
NFYA	transcription regulator	5,94E-04	ALB,CALR,CAT,COL1A2,HSPA5
CALR	transcription regulator	2,52E-04	COL1A1,COL1A2,FN1,VCL	101 (9)
SMAD4	transcription regulator	1,20E-05	APOB,BGN,COL1A2,CTSD,PTX3,SERPINE1,THBS1,TIMP1,TPM1,VIM	75 (16)
KAT5	transcription regulator	2,56E-04	AFP,ALB,APEX1,COL2A1,NT5E,TTR	8 (2)
MYOD1	transcription regulator	9,62E-04	ALDOA,FSTL1,MMP2,PNP,POSTN,PSMB4,TKT
TBX5	transcription regulator	1,89E-05	COL1A1,COL1A2,COL3A1,POSTN,TPM1,VIM
HDAC2	transcription regulator	5,97E-04	APEX1,COL1A2,COL2A1,COMP,S100A9,TAGLN
TP63	transcription regulator	9,09E-15	COL5A1,CSTA,CTSD,FN1,HSPA8,IGFBP3,IGFBP6,IGFBP7,KRT1,KRT10,KRT14,KRT6A,KRT6B,KRT6C,MFGE8,POSTN,S100A8,SERPINE1,SERPINF1,TAGLN,THBS1,TPM1,VIM	53 (6)
BRCA2	transcription regulator	4,11E-02	SERPINE1
CARM1	transcription regulator	3,64E-02	C3,KRT1
DRAP1	transcription regulator	1,70E-02	GAPDH,RPLP0
MAFK	transcription regulator	1,20E-02	HBB,TXN
EP300	transcription regulator	4,66E-05	ANXA6,B2M,COL1A2,COL2A1,FN1,GM2A,HBB,JUP,KRT14,KRT16,LDHA,LGALS3BP,LMNA	70 (9)
TADA3	transcription regulator	4,11E-02	CTSD
MITF	transcription regulator	3,72E-03	COL1A1,COL2A1,FN1,GM2A,MDH1,SERPINE1,SERPINF1	55 (11)
HOXA9	transcription regulator	1,53E-02	AKAP13,LYZ,S100A8,VIM,YWHAG
RFX1	transcription regulator	3,59E-04	COL1A1,COL1A2,LMNA
MTA1	transcription regulator	4,81E-02	APEX1,MMP2
NFE2L1	transcription regulator	1,59E-07	PSMA6,PSMA7,PSMB1,PSMB2,PSMB5,PSMB6
NKX2-8	transcription regulator	8,36E-03	AFP
NKX3-1	transcription regulator	9,41E-03	CTSB,CTSZ,IGFBP3
E2F4	transcription regulator	3,91E-02	CALM1 (includes others),HSP90B1,PRKCSH,PSAT1,SERPINE1
SATB1	transcription regulator	4,89E-04	ACTG1,ACTN1,CTSD,HBB,HSPA8,RPLP0,VIM
HNF1A	transcription regulator	4,54E-06	AFP,AHSG,ALB,APOB,COL3A1,CTSZ,DSC1,GDI2,HSPA5,PSMA5,PZP,SERPINE1,SERPING1,TPI1,TTR	47 (2)
CNOT7	transcription regulator	2,18E-03	B2M,CSTA,LGALS3BP
MED13	transcription regulator	1,44E-02	ENO1,TKT
ATF4	transcription regulator	9,93E-06	APEX1,CALR,HSP90B1,HSPA5,NID2,PSAT1,PTX3,SERPINF1
RB1	transcription regulator	2,17E-02	FN1,KRT10,KRT4,PTX3,SERPINE1,YWHAE
GATA3	transcription regulator	2,15E-02	KRT14,KRT17,S100A8,S100A9,VIM
HNF1B	transcription regulator	8,62E-13	ACTN1,AFP,ALB,BGN,COL5A1,FN1,GDI2,IGFBP3,LAMB1,LUM,MMP2,NID2,SPARC,TTR	67 (11)
FHL2	transcription regulator	2,13E-02	CTSD,TAGLN
USF2	transcription regulator	9,85E-06	B2M,CHI3L1,IGFBP3,LGALS3BP,SERPINE1,THBS1
DNAJB6	transcription regulator	2,41E-03	AZGP1,SPARC
KLF6	transcription regulator	1,45E-02	ARG1,COL1A1,KRT4
EGR1	transcription regulator	1,37E-05	COL1A1,COL1A2,COL2A1,FN1,GNAS,LYZ,SERPINE1,THBS1,TIMP1	112 (20)
HOXC13	transcription regulator	3,30E-02	KRT32
GATA6	transcription regulator	2,80E-05	AFP,ARG1,C4A/C4B,GPI,KRT14,KRT17,LDHB,TAGLN
MEF2C	transcription regulator	6,86E-07	CALR,COL1A1,COL1A2,COL2A1,COL3A1,POSTN,TPM1,VIM	14 (2)
ING2	transcription regulator	1,67E-02	SERPINE1
SMAD3	transcription regulator	3,64E-12	ALB,APOB,BGN,COL1A1,COL1A2,COL2A1,COL3A1,COL6A1,COL6A3,FN1,LUM,SERPINE1,TAGLN,THBS1,TIMP1,TPM1,VIM	122 (22)
HOXD3	transcription regulator	2,27E-16	COL1A1,DSG1,DSP,IGFBP3,JUP,MMP2,SERPINE1,TAGLN,TGFBI,THBS1
SMARCB1	transcription regulator	4,89E-04	A2M,C4A/C4B,COL1A1,COL1A2,JUP,POSTN,SPARC
ARNT2	transcription regulator	1,78E-03	COL12A1,ITIH3,KRT5,LTF,PFN1,POSTN,SERPINA5
ETS1	transcription regulator	1,83E-03	COL1A2,COL2A1,FN1,HSPA8,MMP2,SERPINB6,SERPINE1	112 (15)
TBP	transcription regulator	1,79E-02	COL1A1,FN1,GAPDH
YAP1	transcription regulator	1,72E-02	FN1,TAGLN,VIM
Yap1	transcription regulator	2,49E-02	TAGLN
BARX2	transcription regulator	9,74E-03	FLNA,TIMP1
SOX9	transcription regulator	1,27E-02	COL1A1,COL2A1,COMP
FOSL2	transcription regulator	7,55E-03	COL1A2,MMP2,TIMP1	78 (7)
GLIS1	transcription regulator	4,11E-02	S100A9
MYB	transcription regulator	9,09E-05	COL1A2,FN1,HSPA5,HSPA8,IGFBP3,VIM
KAT2B	transcription regulator	3,35E-03	B2M,COL1A2,HBB	40 (8)
SIN3B	transcription regulator	1,32E-02	COL1A2,LDHA
SNAI2	transcription regulator	2,88E-05	COL2A1,DSP,FN1,JUP,VIM
TRIM24	transcription regulator	8,97E-03	ITIH2,LGALS3BP,SERPINE1,TGFBI
THOC1	transcription regulator	8,36E-03	CALR
ZBTB7B	transcription regulator	2,39E-03	COL1A1,COL1A2,COL2A1
PLAGL2	transcription regulator	3,30E-02	LDHA
KLF7	transcription regulator	2,49E-02	HBB
NKX3-2	transcription regulator	1,42E-03	COL2A1,POSTN
HTT	transcription regulator	6,32E-12	ALDOA,B2M,COL4A2,COL6A1,COL6A3,CTSD,CYCS,FN1,GAPDH,GPI,GSS,HSPA5,HSPA8,JUP,KRT1,LDHA,LDHB,LTF,MMP2,PFN1,PSMA5,PSMB4,SERPINF1,SERPING1,TAGLN,TGFBI,TPI1,YWHAG	90 (4)
MYCN	transcription regulator	3,45E-20	ACTG1,ACTN4,ALDOA,APEX1,B2M,COL1A1,FN1,GAPDH,IGFBP7,LDHA,MMP2,NME1,NUCB1,PDIA4,PSMA7,PSMB6,RPL18,RPLP0,SERPINE1,SPARC,TAGLN,TIMP2,TPI1,TPM1,VIM	74 (7)
YY1	transcription regulator	5,09E-03	CALR,COL1A1,HSPA5,MMP2,TAGLN,TGFBI,YWHAE	86 (18)
GTF2I	transcription regulator	4,44E-06	CAT,HSPA5,PDIA4,THBS1
DACH1	transcription regulator	4,02E-02	IGFBP3,SERPINE1
PRDM1	transcription regulator	5,15E-04	AFP,CHI3L1,IGHG1,LGALS7/LGALS7B,S100A8,S100A9,SERPINB3,TTR
NFKB1	transcription regulator	7,27E-07	A2M,B2M,CHI3L1,COL1A1,COL1A2,COL2A1,CTSB,IGFBP3,IGHG1,IGKC,KRT6B,PTX3	115 (15)
RELA	transcription regulator	8,77E-08	A2M,ACTN4,AFP,B2M,C3,CHI3L1,COL1A1,COL1A2,COL2A1,CTSB,IGHG1,IGKC,LUM,PTX3,SERPINE2,VIM	126 (15)
FOSB	transcription regulator	2,84E-03	MMP2,SERPINE1,TIMP1	40 (7)
T	transcription regulator	8,71E-03	COL1A1,COL2A1
RUNX2	transcription regulator	1,62E-09	C4A/C4B,COL1A1,COL1A2,FN1,GNAS,LUM,MMP2,SERPINE1,TAGLN,TIMP1,TPM1	92 (17)
FOS	transcription regulator	2,14E-19	A2M,ACTG1,CALU,CAT,CHI3L1,COL1A1,COL6A1,CSTA,CTSB,CYCS,ENO1,FN1,FSTL1,GM2A,HSP90B1,HSPA5,KRT13,LGALS3BP,MMP2,PFN1,PRDX1,PSMA2,PSMA7,RPLP0,S100A8,S100A9,SERPINE1,SERPINE2,TGFBI,TIMP1,TXN,VIM,YWHAZ	96 (10)
FOSL1	transcription regulator	2,82E-03	MMP2,SERPINE1,SERPINE2,SPARC	37 (4)
CBL	transcription regulator	4,86E-03	COL1A1,FN1,MMP2	109 (19)
PAX3	transcription regulator	6,22E-03	ANXA1,COL1A2,CST3,HSPG2,PPIB,YWHAE
BRCA1	transcription regulator	1,07E-02	CTSD,HBB,KRT17,KRT5,SERPINE2
HDAC1	transcription regulator	1,49E-02	APEX1,COL1A2,COL2A1,GNAS,S100A9,TAGLN
SNAI1	transcription regulator	6,50E-09	ACTN1,CFL1,COL1A1,COL2A1,FLNA,FN1,KRT17,PEBP1,SPARC,TPM1	47 (7)
MAFB	transcription regulator	4,02E-02	ACTN1,TAGLN
FOXA1	transcription regulator	8,65E-04	AFP,ANXA1,FSTL1,KRT16,TAGLN,TTR
BACH1	transcription regulator	1,08E-02	CALM1 (includes others),HBB
EHF	transcription regulator	5,30E-04	COL2A1,S100A8,S100A9,SERPINE1,TIMP1
SIX4	transcription regulator	3,30E-02	ALDOA
KLF5	transcription regulator	1,01E-03	ARG1,KRT5,S100A9,TAGLN
CEBPZ	transcription regulator	4,11E-02	COL1A2
SMARCA4	transcription regulator	1,04E-10	A2M,ACTN4,AFP,ALB,AZGP1,CTSB,FN1,GAPDH,HBB,IGFBP7,IGHG1,LMNA,LUM,MFGE8,MMP2,PTX3,SEMA7A,SERPINB8,SERPINE1,SERPINE2,TAGLN,TIMP2,TPM1,TTR	104 (7)
RFX2	transcription regulator	2,41E-03	COL1A2,LMNA
NFKBIA	transcription regulator	2,10E-12	A2M,AZGP1,C3,CHI3L1,COL1A2,COL2A1,COL3A1,CTSB,CTSZ,FN1,GM2A,HSPA5,HSPA8,IGFBP6,MFGE8,PTX3,RPSA,S100A8,S100A9,SERPINE2,TIMP1,TIMP2,YWHAZ	114 (18)
ERF	transcription regulator	4,91E-02	SEMA7A
RELB	transcription regulator	1,79E-02	B2M,CHI3L1,IGHG1
MTPN	transcription regulator	1,68E-09	AHSG,ANXA1,APOD,COL1A1,COL1A2,FN1,S100A8,SERPINE1,SPARC,TAGLN
CREB3L1	transcription regulator	1,32E-05	COL1A1,COL1A2,HSP90B1,HSPA5
CREBBP	transcription regulator	8,63E-05	ANXA6,B2M,COL1A2,COL2A1,GM2A,GNAS,HBB,JUP,KRT14,LGALS3BP,SERPINE2,TAGLN	59 (13)
CTNNB1	transcription regulator	1,32E-11	ACTN4,AFP,AKAP13,ANXA1,APOD,BGN,CALM1 (includes others),COL1A1,COL2A1,COL4A2,CTSZ,FN1,KRT1,KRT5,LAMB1,LMNA,MFGE8,MMP2,PFN1,PRKCSH,RCN1,S100A8,SERPINA5,SERPINE1,SERPINE2,TIMP1,VIM	103 (17)
CUX1	transcription regulator	8,04E-05	FLNA,LTF,MMP2,THBS1,VIM
SF1	transcription regulator	1,02E-03	COL1A1,FN1
Foxe3	transcription regulator	4,11E-02	TTR
PAX1	transcription regulator	6,71E-03	COL2A1,KRT14,KRT17
Esrra	transcription regulator	3,35E-02	ALDOA,CYCS,ENO1
HMGB2	transcription regulator	4,11E-02	COL2A1
RFX5	transcription regulator	2,43E-04	B2M,COL1A1,COL1A2
SRSF2	transcription regulator	1,98E-02	COL1A1,VIM
RFXANK	transcription regulator	4,11E-02	COL1A2
TP53	transcription regulator	5,44E-19	A2M,ACTN1,ACTN4,AFP,ALB,ANXA1,ANXA2,ANXA6,APEX1,CALU,CAT,COL1A1,COL1A2,COL2A1,COL3A1,COL4A2,COL6A2,CTSB,CTSD,FN1,FSTL1,GAPDH,GPI,HSPA8,HSPG2,IGFBP3,IGFBP7,KRT14,LDHA,LYZ,MMP2,NID2,NME1,P4HB,PFN1,POSTN,PRDX2,RPSA,SERPINB6,SERPINC1,SERPINE1,SERPINE2,SERPING1,TAGLN2,TGFBI,THBS1,TIMP2,VASN,VCL,VIM	120 (16)
WT1	transcription regulator	2,43E-05	HSP90B1,HSPG2,JUP,MMP2,NME1,NUCB1,PDIA4,PPIB,SERPINE1,THBS1
PDX1	transcription regulator	1,58E-05	ACTG1,ALB,ANXA2,CAT,COL1A1,COL3A1,GNAS,IGFBP3,MDH1
HOXA7	transcription regulator	2,43E-02	KRT10,VIM
MYC	transcription regulator	7,89E-30	ACTN1,ACTN4,AFP,ALB,ALDOA,ANXA5,ANXA6,APEX1,ARG1,COL1A1,COL1A2,COL2A1,COL3A1,COL4A2,COL5A1,COL6A3,CTSB,CTSD,CYCS,DSP,ENO1,FLNA,FN1,FSTL1,GAPDH,GDI2,GM2A,GOT2,GPI,KRT14,KRT17,KRT6B,LDHA,LDHB,LUM,LYZ,MSN,NME1,NUCB1,PGAM1,PPIA,PRDX2,PRDX4,PSAT1,SERPINE1,SERPINE2,SPARC,TAGLN2,THBS1,TIMP1,TIMP2,TKT,TPI1,TXN,VIM	148 (23)
ID4	transcription regulator	3,64E-03	MMP2,VIM
MEF2D	transcription regulator	2,59E-02	COL1A2,COL3A1
DOT1L	phosphatase	1,20E-02	PPIA,RPLP0
PTPN23	phosphatase	2,49E-02	VIM
PTEN	phosphatase	3,29E-04	ANXA1,ARG1,C3,CTSB,CTSZ,IGFBP3,IGFBP6,KRT19,MDH1,MMP2,SERPINE1,THBS1	97 (17)
PTP4A3	phosphatase	8,71E-03	FN1,JUP
NT5E	phosphatase	7,97E-06	COL1A1,COL3A1,SERPINE1,TIMP1	69 (9)
PPP1R1A	phosphatase	2,49E-02	HSPA5
PPP2R2A	phosphatase	4,11E-02	SERPINE2
PLPP3	phosphatase	1,67E-02	FN1
PPP1R3A	phosphatase	8,36E-03	THBS1
PTP4A2	phosphatase	3,30E-02	VCL
PPP3CA	phosphatase	1,86E-02	C3,FN1,VIM
PPP2R5B	phosphatase	3,30E-02	SERPINE2
Ren2	peptidase	2,97E-04	COL3A1,CYCS,TIMP1
RAB7B	peptidase	4,91E-02	CTSD
ZMPSTE24	peptidase	1,20E-02	IGFBP3,LMNA
CASP1	peptidase	2,93E-02	COL1A1,VIM
CTSD	peptidase	2,49E-02	TXN
CFB	peptidase	2,97E-04	C3,C4A/C4B,HSPA5
ADAM17	peptidase	2,80E-04	COL3A1,FN1,KRT1,MMP2	109 (17)
MMP9	peptidase	1,35E-04	CTSB,MMP2,SERPINE2,TIMP1,VIM	110 (18)
CFI	peptidase	8,36E-03	C3
PROC	peptidase	5,87E-04	CALR,MMP2,SERPINE1,THBS1	129 (23)
RCE1	peptidase	4,53E-08	ACTN4,B2M,FSTL1,GDI2,LMNA,RCN1,TGFBI
PLAU	peptidase	1,18E-06	ARG1,FN1,HSPA5,S100A8,S100A9,SERPINE1,VIM	130 (19)
PSMB1	peptidase	2,49E-02	PSMB5
MMP13	peptidase	4,91E-02	COL1A1
USP2	peptidase	3,30E-02	SERPINE1
PSEN1	peptidase	1,17E-11	ACTG1,ALB,ALDOA,C3,CFL1,CTSZ,CYCS,ENO1,GAPDH,GDI2,GOT2,HSPA5,HSPA8,NME1,PEBP1,PGAM1,PPIA,TPI1,TXN,YWHAE,YWHAZ	97 (5)
TLL1	peptidase	8,36E-03	IGFBP3
CTSB	peptidase	1,20E-02	COL1A1,CTSB
BMP1	peptidase	2,49E-02	IGFBP3
DPP4	peptidase	1,02E-03	MMP2,TIMP1,TIMP2	93 (19)
ACE	peptidase	3,64E-03	LDHA,SERPINE1	51 (7)
F2	peptidase	2,67E-04	CALR,COL1A1,FN1,PDIA4,SERPINC1,SERPINE1,TAGLN2,THBS1,TIMP2	112 (16)
SENP1	peptidase	1,20E-02	CYCS,MMP2
ADAMTS12	peptidase	6,13E-05	CHI3L1,S100A8,S100A9,TAGLN
CMA1	peptidase	4,13E-04	COL1A1,COL3A1	56 (7)
PLG	peptidase	2,25E-02	COL1A1,MFGE8,SERPINE1
CFD	peptidase	8,36E-03	C3
PLAT	peptidase	1,98E-03	FN1,MMP2,SERPINE1	111 (22)
ELANE	peptidase	2,18E-03	CTSB,HSPA5,MMP2	49 (8)
PSMB5	peptidase	2,07E-04	PSMB1,PSMB2	28 (3)
MMP1	peptidase	8,71E-03	FN1,TAGLN	71 (7)
ACE2	peptidase	4,34E-03	FN1,SERPINE1	32 (7)
ADAMTS5	peptidase	1,67E-02	BGN
ADAM9	peptidase	4,11E-02	TIMP1
CAPN1	peptidase	4,91E-02	MMP2
KLK5	peptidase	9,74E-03	S100A8,S100A9
MICU1	other	1,67E-02	CYCS
ABLIM2	other	8,36E-03	TAGLN
RETNLB	other	4,58E-05	COL1A1,COL1A2,FN1,MMP2,MSN,TIMP1	108 (18)
FEZF1	other	3,30E-02	TIMP1
SFTPA2	other	1,67E-02	HSPA5
NAP1L1	other	6,61E-05	AFP,ALB,TTR
DPPA3	other	4,91E-02	AFP
FMOD	other	1,67E-02	LUM
TMBIM1	other	2,49E-02	MMP2
KDM8	other	2,99E-03	ENO1,LDHA	20 (3)
VIPAS39	other	1,02E-03	SPARC,THBS1
ZMIZ1	other	4,11E-02	SERPINE1
PDLIM2	other	7,47E-03	FSTL1,IGFBP3,LGALS3BP,TAGLN
SCGB3A2	other	1,42E-03	CTSD,MMP2
OLFM2	other	3,30E-02	TAGLN
FOXN2	other	8,36E-03	HBB
ABLIM3	other	8,36E-03	TAGLN
USE1	other	3,30E-02	HSPA5
RBM17	other	1,67E-02	FN1
GLIPR2	other	3,30E-02	VIM
MYOC	other	8,67E-04	ANXA1,FN1,HSPA5,LAMB1,LAMC1
ZNF451	other	2,49E-02	SERPINE1
BTBD7	other	1,67E-02	MMP2
DERL1	other	1,67E-02	MMP2
NDUFAF3	other	2,49E-02	CTSD
ABRA	other	1,67E-02	TAGLN
FLCN	other	4,11E-02	SERPINE1
SNED1	other	1,42E-03	GAPDH,IGFBP3
RICTOR	other	5,04E-08	PSMA2,PSMA3,PSMA4,PSMA5,PSMA6,PSMA7,PSMB1,PSMB2,PSMB4,PSMB5,PSMB6,RPL18,RPLP0,RPSA
VGLL3	other	2,22E-06	COL12A1,COL1A1,COL1A2,THBS1
ASPN	other	3,30E-02	COL2A1
STOX1	other	5,92E-03	ACTG1,CALM1 (includes others)
RPRD1A	other	3,30E-02	CTSB
KDM6B	other	7,88E-04	FN1,PPIA,VIM
FKRP	other	1,67E-02	LAMC1
TINCR	other	1,88E-03	KRT1,KRT10
FRZB	other	1,67E-02	COL2A1
MALAT1	other	4,11E-02	VIM
S100A14	other	8,36E-03	MMP2
PACS2	other	1,67E-02	HSPA5
FILIP1	other	8,36E-03	FLNA
TRAM2	other	1,67E-02	COL1A1
PECAM1	other	8,71E-03	MMP2,THBS1	106 (15)
SLC9A3R1	other	6,80E-03	KRT19,MSN
GAB2	other	2,93E-02	SERPINE1,SPARC
PLP1	other	2,76E-02	HSPA5,TIMP1
VWF	other	2,49E-02	YWHAZ
Ins1	other	6,90E-08	ALB,COL1A1,GAPDH,GDI2,IGFBP3,LDHA,LDHB,LGALS3BP,MMP2,PPIB,SERPINE1,SPARC,TIMP1,TIMP2,VIM	88 (16)
ITGB5	other	4,91E-02	COL1A2
PRCC	other	8,36E-03	SERPINE1
RBBP5	other	1,67E-02	CTSD
DSG3	other	8,36E-03	KRT14
PXN	other	4,11E-02	VCL
NELFB	other	4,34E-03	COL6A1,RPLP0
DYNLRB1	other	8,36E-03	SERPINE1
COL9A1	other	8,36E-12	COL12A1,COL2A1,COMP,FN1,HSPG2,MFGE8,TGFBI
SEMA3F	other	4,11E-02	MMP2
DEF6	other	2,97E-04	FN1,MMP2,VIM	66 (6)
MIA	other	1,88E-03	FN1,SPARC
NREP	other	2,43E-04	COL3A1,MMP2,TAGLN
IBSP	other	6,95E-05	MMP2,THBS1
ARFGEF2	other	1,67E-02	FLNA
COL2A1	other	7,73E-03	COL1A1,COL3A1
FAF1	other	4,11E-02	VIM
ZNF224	other	1,67E-02	ALDOA
ARHGDIG	other	9,74E-03	ANXA1,JUP
H2AFZ	other	5,91E-04	AFP,ALB,TTR
CLDN1	other	6,84E-04	MMP2,VIM
SEL1L	other	1,96E-04	HSPA5,TIMP1,TIMP2
BAG4	other	2,49E-02	APOB
PKIA	other	3,30E-02	FN1
COL18A1	other	9,12E-04	FN1,LDHA,MMP2,SERPINE1,THBS1	107 (23)
Cd24a	other	3,30E-02	MMP2
Nppb	other	3,30E-02	COL1A1
NPPB	other	1,98E-03	COL1A1,COL3A1,FN1	96 (12)
KRT19	other	4,91E-02	HSPA5
Rcan1	other	8,36E-03	FLNA
MAPT	other	3,24E-15	ACTG1,ALB,ALDOA,C3,CFL1,CYCS,ENO1,GAPDH,GDI2,GOT2,HSPA5,HSPA8,MDH1,NME1,PEBP1,PGAM1,PPIA,TPI1,TXN,YWHAE,YWHAZ	81 (5)
TRD	other	2,49E-02	NT5E
ELAVL1	other	4,17E-04	CALM1 (includes others),FLNA,GSS,PCOLCE,PSMB4
LGALS1	other	6,91E-04	FN1,MMP2,PTX3,SERPINE1	119 (24)
FBLN2	other	3,30E-02	MMP2
HIST1H1C	other	4,91E-02	GAPDH
AGRP	other	2,41E-03	PSMA2,PSMA4
TICAM2	other	1,70E-02	IGHG1,S100A8
CUL4A	other	3,30E-02	CAT
CLDN6	other	1,70E-02	HSPA5,TGM3
SERPINE1	other	3,27E-02	CALR,FN1
FERMT2	other	1,67E-02	FN1
ADCYAP1	other	4,92E-06	ACTN1,CFL1,COL3A1,COL5A1,LUM,POSTN,RPSA,SERPINE2,SERPINF1,SPARC,TGFBI	73 (4)
NID1	other	1,67E-02	NID2
H2AFY	other	3,91E-03	FN1,SERPINE1,SPARC
LTBP1	other	1,44E-02	COL2A1,SERPINE1
BAZ1A	other	1,67E-02	IGFBP3
S100A9	other	2,18E-03	C3,S100A8,S100A9
RTN4	other	9,37E-04	CFL1,YWHAB,YWHAG,YWHAQ
APAF1	other	4,13E-04	HSPA5,VIM
POMC	other	8,05E-03	APOB,GAPDH,KRT16,TIMP2
KRT14	other	8,14E-10	DSC1,DSG1,HSPA5,KRT1,KRT16,KRT17,KRT5,KRT6B
FBN1	other	1,54E-08	COL1A2,COL3A1,COL4A2,COL6A3,MMP2,SERPINE1	101 (14)
FST	other	8,45E-03	CYCS,FN1,MMP2	64 (14)
ADIPOQ	other	2,69E-02	ARG1,COL3A1,FN1,TIMP1
ANXA2	other	2,59E-02	IGFBP3,MMP2
IGFBP5	other	1,08E-02	COL1A1,SERPINE1
THBS2	other	4,91E-02	MMP2
SUMO3	other	3,45E-02	HSPA8,PNP
CLDN7	other	1,99E-02	C3,IGFBP7,MMP2,TIMP2
TIAM1	other	3,30E-02	TIMP1
WNT5B	other	3,30E-02	COL2A1
ITGA9	other	4,91E-02	VIM
RLN2	other	5,10E-03	MMP2,TIMP1	72 (11)
CHADL	other	1,79E-03	COL2A1,IGFBP3,PTX3
APP	other	4,47E-20	ACTG1,ALB,ALDOA,ARG1,C3,C4A/C4B,CALR,CAT,CFL1,CTSB,CTSD,CYCS,ENO1,FLNA,FN1,GAPDH,GDI2,GOT2,GPI,HSPA5,HSPA8,HSPG2,LDHA,LDHB,MMP2,NME1,PEBP1,PGAM1,PPIA,PRDX2,S100A8,SERPINE1,SERPINF1,TAGLN,TPI1,TPM1,TTR,TXN,YWHAB,YWHAE,YWHAZ	122 (15)
CR1L	other	1,16E-15	BGN,C3,COL1A1,COL1A2,COL3A1,COL4A2,COL5A1,COL6A1,COL6A3,LUM,SERPINE1	64 (7)
SRSF1	other	1,45E-03	COL1A1,FN1,VIM
LGALS7/LGALS7B	other	1,42E-03	COL1A2,SERPINE1
HSP90B1	other	1,98E-02	CALR,HSPA5
ITGA1	other	1,70E-02	COL2A1,MMP2
CDH1	other	2,83E-04	IGFBP3,JUP,KRT13,KRT19,VIM
SSPN	other	4,91E-02	CTSB
COL4A3	other	2,34E-15	COL1A1,COL1A2,COL3A1,COL4A2,FN1,LAMB1,LAMC1,MMP2,TIMP1,TIMP2	108 (16)
IGFBP3	other	3,27E-02	COL2A1,SERPINE1
COL7A1	other	1,67E-02	THBS1
ARRB2	other	2,13E-02	MMP2,SERPINE1
INS	other	2,04E-02	CAT,HSPA5,IGFBP3,IGKC
MYD88	other	9,64E-04	ARG1,C3,HSPA5,IGHG1,MMP2,S100A8,SERPINE1,TIMP1	110 (21)
TIA1	other	4,11E-02	HBB
PFN1	other	2,49E-02	ANXA2
DCX	other	6,84E-04	ACTN1,ACTN4
CDH4	other	4,11E-02	MMP2
IGFBP2	other	5,87E-04	FN1,IGFBP3,MMP2,POSTN	107 (13)
S100A4	other	2,90E-07	FN1,MMP2,THBS1,TIMP1,TIMP2,VIM	94 (18)
IGFBP4	other	1,42E-03	IGFBP3,IGFBP6
PTH	other	4,33E-05	COL1A1,COL1A2,COL2A1,FN1,IGFBP3,LMNA,MMP2,POSTN	108 (22)
TERC	other	3,10E-02	GPI,S100A9
STRAP	other	2,49E-02	SERPINE1
TUBB3	other	8,36E-03	ANXA5
CTNNA1	other	8,36E-03	VCL
SNCA	other	1,31E-09	CFL1,CTSB,HSP90B1,HSPA5,LDHB,PSMA3,SERPINE1,TPI1,YWHAE,YWHAG	113 (10)
BANF1	other	8,36E-03	S100A9
DST	other	1,67E-02	HSPA5
GIPC1	other	3,30E-02	SERPINE1
TP53INP1	other	4,91E-02	SPARC
ITGB6	other	2,21E-07	COL1A1,COL1A2,COL3A1,MMP2,SERPINE1	96 (19)
FSCN1	other	8,36E-03	MMP2
CST5	other	8,36E-03	ANXA5
SERPINB4	other	8,36E-03	SERPINB3
DBI	other	4,11E-02	APOB
NCAM1	other	7,73E-03	CALR,THBS1
FRS2	other	5,10E-03	KRT14,TAGLN
CTNNAL1	other	3,30E-02	FN1
COL6A1	other	5,92E-03	ALDOA,TPI1
TIMP3	other	4,34E-03	MMP2,VIM	104 (13)
SPARC	other	3,72E-05	COL1A1,COL1A2,FN1,MMP2,SERPINE1,SPARC,VIM	127 (21)
LAMC2	other	1,67E-02	MMP2
LAMC1	other	5,92E-03	FN1,VIM	66 (5)
KRT5	other	2,49E-02	SERPINF1
CHGA	other	4,91E-02	HSPA5
TNC	other	2,18E-03	COL2A1,MMP2,TPM1	20 (4)
BIRC5	other	2,79E-11	BGN,COL1A1,COL3A1,FN1,IGHG1,LAMA4,LUM,LYZ,MMP2,VIM
IFRD1	other	2,59E-02	CTSZ,PPIA
ITGA3	other	1,49E-06	FN1,MMP2,SERPINE1,VCL	103 (19)
KNG1	other	2,18E-03	CALR,COL1A1,COL1A2	103 (20)
BBC3	other	3,30E-02	PRDX1
ZNF184	other	8,36E-03	S100A9
SPOCK1	other	8,36E-03	MMP2
THBS1	other	8,29E-05	FN1,MMP2,THBS1,TIMP1	112 (21)
TNFAIP6	other	4,91E-02	ITIH2
SCUBE3	other	4,66E-05	MMP2,SERPINE1,VIM	20 (4)
NBEAL2	other	3,30E-02	THBS1
CCHCR1	other	1,67E-02	KRT17
UACA	other	4,91E-02	HSPA5
ERBB2IP	other	4,91E-02	SERPINE1
S100A2	other	2,49E-02	KRT10
PSMD4	other	4,11E-02	A2M
ORC2	other	4,11E-02	HBB
SSRP1	other	3,10E-02	MSN,TAGLN
LMNB1	other	4,53E-08	ACTN4,B2M,FSTL1,GDI2,LMNA,RCN1,TGFBI
PRNP	other	2,57E-05	CTSD,HSP90B1,HSPA5,HSPA8,PDIA3
THY1	other	8,71E-03	MMP2,VIM	87 (11)
BID	other	4,28E-04	CTSB,CTSD,TIMP1
SYNPO	other	8,36E-03	ACTN4
PTHLH	other	1,39E-02	COL2A1,FN1,SERPINE1
LGALS3	other	7,40E-04	COL3A1,FN1,KRT19,LGALS7/LGALS7B,PRKCSH	31 (5)
ABLIM1	other	8,36E-03	TAGLN
SCX	other	6,85E-04	COL1A1,COMP,POSTN
DSPP	other	4,11E-02	BGN
CCNA1	other	3,30E-02	MMP2
MCAM	other	4,66E-05	FN1,MMP2,VIM	79 (7)
CIDEC	other	2,28E-02	CYCS,SERPINE1
CUL4B	other	3,35E-03	IGFBP3,NME1,TPI1
VTN	other	1,09E-04	COL1A1,COL1A2,MMP2,SERPINE1	97 (17)
CGA	other	2,76E-02	MMP2,TIMP2
THBS4	other	2,70E-06	CALR,COL2A1,COL3A1,HSPA5,P4HB	36 (5)
SFTPC	other	4,91E-02	HSPA5
SPRY4	other	4,11E-02	TAGLN
DSP	other	1,49E-06	COL1A1,COL1A2,COL3A1,JUP
DYSF	other	4,46E-06	ACTG1,ANXA1,ANXA2,B2M,FN1,LYZ,TIMP1
CYR61	other	1,56E-05	COL1A1,COL1A2,SERPINE1,TIMP1,TIMP2	94 (23)
DCN	other	7,33E-05	BGN,COL1A2,MMP2,SERPINE1,THBS1	66 (14)
NEDD9	other	3,64E-02	SERPINE1,VIM
Wfdc17	other	4,11E-02	ARG1
CLEC4M	other	4,91E-02	C3
Hmgn3	other	2,18E-03	AHSG,AZGP1,TTR
CALCA	other	7,75E-03	AKAP13,ALB,COL3A1,LMNA
COL10A1	other	8,36E-03	HSPA5
Ewsr1	other	1,67E-02	LMNA
HRG	other	1,20E-02	SPARC,TIMP1
Hrg	other	4,91E-02	ARG1
Pln	other	2,40E-08	AHSG,ALDOA,ANXA2,CALU,ENO1,HSP90B1,TPI1,VIM
CHTOP	other	2,49E-02	LTF
PRR13	other	8,36E-03	THBS1
GIMAP1-GIMAP5	other	2,49E-02	HSP90B1
PELP1	other	8,45E-03	COL12A1,MMP2,PSAT1
FMR1	other	1,96E-06	ALDOA,CFL1,ENO1,GAPDH,PPIA,RPSA
GNRH2	other	3,30E-02	RPSA
NET1	other	1,02E-03	FN1,SERPINE1	70 (7)
S100P	other	4,66E-05	CFL1,CTSD,KRT19
SERPINH1	other	2,29E-06	COL1A1,COL4A2,SERPINE1
mir-155	microrna	3,05E-02	ANXA2,SERPINE1,YWHAZ
mir-1	microrna	1,68E-03	ANXA2,FN1,HSP90B1,PPIB,TAGLN2
mir-29	microrna	1,33E-02	COL1A1,MMP2,THBS1
mir-196	microrna	3,19E-06	ANXA1,COL1A1,KRT5,S100A9
mir-183	microrna	4,28E-04	FN1,JUP,VIM
let-7	microrna	2,75E-02	COL1A1,FN1,THBS1,VIM
mir-122	microrna	6,40E-03	ALDOA,LAMC1,SERPINB6,VIM
mir-133	microrna	4,81E-02	FN1,TAGLN
mir-140	microrna	4,11E-02	VIM
mir-146	microrna	4,61E-02	CAT,MMP2
mir-21	microrna	1,18E-02	COL1A1,COL3A1,IGHG1,MMP2,TPM1
mir-143	microrna	1,96E-04	COL3A1,MMP2,TAGLN
mir-138	microrna	3,30E-02	VIM
mir-145	microrna	4,41E-02	COL5A1,TAGLN
mir-375	microrna	3,30E-02	YWHAZ
mir-182	microrna	7,12E-03	FN1,JUP,VIM
mir-663	microrna	8,36E-03	HSPG2
mir-96	microrna	2,97E-04	FN1,JUP,VIM
mir-24	microrna	2,93E-02	FN1,SERPINE1
miR-338-3p (miRNAs w/seed CCAGCAU)	mature microrna	1,42E-03	TAGLN,VIM
miR-382-5p (miRNAs w/seed AAGUUGU)	mature microrna	6,84E-04	TAGLN,VIM
miR-29b-3p (and other miRNAs w/seed AGCACCA)	mature microrna	1,20E-05	COL1A1,COL1A2,COL3A1,COL4A2,LAMC1,SPARC
miR-16-5p (and other miRNAs w/seed AGCAGCA)	mature microrna	6,84E-03	HSP90B1,LAMC1,PNP,PSAT1,SERPINE2,TPI1
miR-196a-5p (and other miRNAs w/seed AGGUAGU)	mature microrna	1,49E-06	ANXA1,COL1A1,KRT5,S100A9
miR-615-5p (and other miRNAs w/seed GGGGUCC)	mature microrna	8,36E-03	KRT19
miR-218-5p (and other miRNAs w/seed UGUGCUU)	mature microrna	9,74E-03	COL1A1,CTSB
miR-122-5p (miRNAs w/seed GGAGUGU)	mature microrna	2,28E-03	ALDOA,P4HB,PRDX2,VIM
miR-31-5p (and other miRNAs w/seed GGCAAGA)	mature microrna	5,91E-04	KRT14,KRT16,KRT17
miR-320b (and other miRNAs w/seed AAAGCUG)	mature microrna	1,42E-03	TAGLN,VIM
miR-125b-5p (and other miRNAs w/seed CCCUGAG)	mature microrna	6,65E-03	ARG1,GSS,IGFBP3,KRT19
miR-21-5p (and other miRNAs w/seed AGCUUAU)	mature microrna	1,27E-02	MMP2,TAGLN,TPM1
miR-1285-3p (and other miRNAs w/seed CUGGGCA)	mature microrna	3,30E-02	VIM
miR-491-5p (and other miRNAs w/seed GUGGGGA)	mature microrna	4,91E-02	MMP2
miR-199a-3p (and other miRNAs w/seed CAGUAGU)	mature microrna	7,73E-03	CALU,FN1
miR-1-3p (and other miRNAs w/seed GGAAUGU)	mature microrna	2,36E-04	ANXA2,FSTL1,PNP,PPIB,TAGLN2,THBS1,TPM1,YWHAQ
let-7a-5p (and other miRNAs w/seed GAGGUAG)	mature microrna	2,14E-04	COL1A1,COL1A2,DSP,KRT19,TAGLN,THBS1,VIM
ESRRG	ligand-dependent nuclear receptor	1,56E-05	CYCS,ENO1,GAPDH,LDHA,TPI1	55 (7)
NR4A3	ligand-dependent nuclear receptor	9,41E-03	COL1A1,COL6A1,COL6A2
PPARG	ligand-dependent nuclear receptor	1,19E-08	C3,CAT,COL1A1,COL1A2,FN1,GAPDH,IGFBP3,IGFBP6,IGFBP7,KRT19,MDH1,RPSA,S100A8,SERPINE1,TKT,VIM,YWHAE,YWHAG	106 (20)
PPARD	ligand-dependent nuclear receptor	7,18E-04	APOB,FN1,LDHA,LDHB,MFGE8,THBS1,YWHAE
NR1H4	ligand-dependent nuclear receptor	2,05E-04	C3,LDHA,MMP2,PGAM1,TIMP1,TIMP2,TPI1
ESR2	ligand-dependent nuclear receptor	5,00E-11	APEX1,C3,CASP14,COL1A1,COMP,CTSD,GM2A,IGFBP3,KRT14,KRT16,KRT17,KRT6B,LMNA,MMP2,NID2,PSAT1,PTX3,S100A9,TIMP1,TIMP2,TPM1	127 (15)
THRB	ligand-dependent nuclear receptor	9,03E-04	CTSD,FSTL1,LYZ,MMP2,NME1,TGFBI,YWHAE	88 (7)
PPARA	ligand-dependent nuclear receptor	2,55E-03	ANXA2,APEX1,ARG1,C3,CAT,GOT2,IGFBP3,IGFBP6,TALDO1,TXN	87 (11)
NR4A2	ligand-dependent nuclear receptor	1,16E-03	COL1A1,COL6A1,COL6A2,PTX3
NR5A1	ligand-dependent nuclear receptor	1,72E-02	AFP,C4A/C4B,VIM
RXRA	ligand-dependent nuclear receptor	2,13E-02	C3,CAT,COL1A1,LTF,NME1,TXN
PGR	ligand-dependent nuclear receptor	6,87E-05	AKAP13,COL6A1,COL6A2,FN1,POSTN,S100A8,SERPINA5,SERPINB8,TGFBI,VCL	92 (7)
AHR	ligand-dependent nuclear receptor	4,43E-15	A2M,ACTN1,ALB,COL12A1,COL1A1,COL1A2,COL3A1,COL4A2,COL5A1,COL6A1,COL6A3,CTSD,FN1,HSPA5,MMP2,NID2,SERPINE1,TGFBI,THBS1,TIMP2,TXN,VCL,VIM	124 (20)
NR4A1	ligand-dependent nuclear receptor	9,58E-07	ALDOA,APOB,APOD,COL1A1,COL6A1,COL6A2,JUP,NT5E,PDIA3,PEBP1
NR3C2	ligand-dependent nuclear receptor	1,83E-03	COL1A1,COL3A1,FN1,PPIB,SERPINE1	84 (16)
AR	ligand-dependent nuclear receptor	2,30E-04	AZGP1,C3,C4A/C4B,CALU,COL3A1,HSPA5,IGFBP3,KRT14,SERPINE1,THBS1,VCL,VIM	131 (18)
NR3C1	ligand-dependent nuclear receptor	3,93E-05	A2M,ACTN1,ANXA1,B2M,C4A/C4B,CAT,FN1,KRT14,KRT17,KRT5,PSMA6,SERPINE1,THBS1,TXN,YWHAE,YWHAG,YWHAZ	105 (13)
ESRRA	ligand-dependent nuclear receptor	1,35E-06	CYCS,ENO1,GAPDH,KRT13,LDHA,LDHB,LTF,TPI1	9 (3)
ESR1	ligand-dependent nuclear receptor	8,98E-07	AKAP13,APEX1,C3,CTSB,CTSD,ENO1,FLNA,GM2A,GNAS,HSP90B1,IGFBP3,KRT13,KRT19,LAMB1,LCN1,LGALS3BP,LTF,NME1,NUCB1,PGLS,PSAT1,PTX3,S100A9,SERPINB6,SERPINE1,TIMP2,TPM1,TTR,VIM	116 (14)
CDC42BPB	kinase	8,36E-03	CTSB
IPMK	kinase	7,88E-04	FLNA,PFN1,TAGLN2
BMPR1A	kinase	4,02E-02	COL2A1,SERPINE1
ROR1	kinase	2,41E-03	KRT19,VIM
PRKCD	kinase	8,65E-03	COL1A1,COL1A2,MMP2,SERPINE1	129 (20)
GIT1	kinase	3,30E-02	MMP2
CSNK1E	kinase	2,49E-02	SERPINE1
PAK4	kinase	3,30E-02	CTSB
PRKAA1	kinase	7,19E-03	ALB,FN1,LDHA,PCOLCE	23 (3)
PRKAA2	kinase	3,30E-05	ALB,FN1,HSPA5,LDHA,P4HB,PCOLCE,VIM	91 (7)
MKNK1	kinase	1,85E-06	ANXA2,ANXA5,FLNA,LAMC1,SPARC,TAGLN,VIM,YWHAG
ROCK2	kinase	1,83E-10	DSC1,DSG1,DSP,KRT1,KRT10,MSN,S100A8,SERPINE1
MAP2K1	kinase	1,51E-07	COL1A1,COL1A2,COL3A1,CSTA,CTSB,ENO1,HSPA5,JUP,MMP2,SERPINE2,THBS1	122 (19)
MAPK11	kinase	8,29E-05	CALR,PRDX1,TIMP1,TIMP2
ERN2	kinase	4,11E-02	HSPA5
IKBKB	kinase	5,29E-05	AFP,C3,CTSB,CTSZ,GM2A,IGFBP6,MMP2,PTX3,SERPINE2,TIMP2	86 (13)
MAPK8	kinase	8,65E-03	APOD,COL1A1,CSTA,MMP2,PTX3	106 (14)
MTOR	kinase	1,56E-03	AKAP13,ENO1,FN1,HSP90B1,MDH1,PFN1,PPIB,PSMB5
WNK1	kinase	4,91E-02	SERPINE1
PRKG1	kinase	1,28E-07	COL1A1,COL3A1,FN1,SERPINE1,TAGLN,THBS1	104 (16)
CHUK	kinase	3,10E-04	C3,CTSB,CTSZ,GM2A,IGFBP6,MMP2,PTX3,SERPINE2	92 (14)
PTK2	kinase	1,41E-07	COL1A1,COL1A2,DSP,KRT14,MMP2,THBS1,TIMP1	130 (22)
PRKCA	kinase	2,30E-07	COL1A1,CSTA,CTSB,CYCS,FN1,IGFBP3,S100A8,S100A9,SERPINE1	117 (17)
AKT1	kinase	4,92E-06	CST3,FN1,FSTL1,LAMB1,MMP2,PCOLCE,SERPINE1,SERPINF1,THBS1,TIMP1,VIM	83 (19)
PIK3CA	kinase	5,55E-03	SERPINE1,SPARC,VIM	58 (6)
PRKCZ	kinase	2,39E-03	COL1A2,MMP2,PSAT1	88 (16)
PKM	kinase	3,59E-04	ENO1,LDHA,MMP2	104 (12)
EGFR	kinase	4,58E-19	ANXA1,CHI3L1,COL1A1,COL3A1,COL6A1,COL6A2,CST3,HSP90B1,HSPA5,IGFBP3,KRT16,KRT17,LAMA4,MMP2,POSTN,PPIA,PSMB1,PSMB2,PSMB4,PSMB5,PSMB6,SERPINE1,SERPINE2,THBS1,VCL,VIM	129 (18)
MAPK9	kinase	1,61E-03	GAPDH,LGALS3BP,LMNA,PDIA3,PTX3,RPSA
DDR1	kinase	2,43E-04	COL1A1,COL3A1,MMP2	115 (14)
CDKN1A	kinase	3,66E-02	CTSB,FN1,HSPA5,LGALS3BP,SERPINE1
RAF1	kinase	8,79E-03	ANXA1,CSTA,IGFBP3,LDHA,PNP,TIMP1	86 (9)
STK16	kinase	2,49E-02	SERPINE1
DDR2	kinase	1,02E-03	COL1A1,MMP2
ERBB4	kinase	3,45E-02	COL3A1,SERPINE2,THBS1
BCR	kinase	5,92E-03	DSG1,HBB
MAP3K1	kinase	5,84E-06	COL3A1,CSTA,PRDX1,SERPINE1,THBS1,TIMP1	103 (20)
SPHK1	kinase	1,60E-04	COL1A2,FN1,SERPINE1,TIMP1	107 (17)
ERBB3	kinase	6,53E-05	BGN,COL1A1,COL6A1,LAMA4,SPARC,THBS1	114 (16)
AKT2	kinase	4,21E-02	TIMP1,VIM
PIK3R1	kinase	1,72E-02	COL1A2,MMP2,SERPINE1
RYK	kinase	8,36E-03	FN1
SRC	kinase	5,85E-05	COL1A2,CTSB,ENO1,FN1,MMP2,POSTN,VIM	114 (19)
MAP2K7	kinase	1,16E-03	CSTA,HSPA5,PDIA3,SERPINC1
FGFR1	kinase	3,15E-02	COL1A1,SPARC,VIM
ACVRL1	kinase	2,39E-03	JUP,SERPINE1,TAGLN
MAPK14	kinase	9,31E-06	CALR,CAT,COL1A1,FN1,GNAS,PRDX1,TAGLN,TIMP1,TIMP2	122 (21)
NME3	kinase	4,11E-02	VIM
MAP2K6	kinase	2,33E-02	BGN,MMP2,PRDX1
STK11	kinase	2,31E-03	A2M,ALB,LUM,MMP2,PSMB5,SERPINE1	94 (12)
CSNK2A2	kinase	4,91E-02	JUP
FGFR2	kinase	5,54E-05	AFP,COL1A1,COL4A2,FN1,LAMB1,PCOLCE,TTR	82 (11)
IKBKG	kinase	7,63E-05	C3,CTSB,CTSZ,GM2A,IGFBP6,PTX3,SERPINE2	92 (14)
PIK3C2B	kinase	2,49E-02	KRT1
TEK	kinase	7,73E-03	S100A8,S100A9
INSR	kinase	8,85E-04	ACTN4,CFL1,COL6A3,CTSB,CYCS,GAPDH,GOT2,LYZ,MMP2,SERPINE1	97 (10)
TGFBR1	kinase	1,25E-07	BGN,COL1A1,COL1A2,FN1,SERPINE1,TAGLN,TGFBI,VIM	100 (19)
EIF2AK4	kinase	1,84E-02	CAT,PSAT1
AK1	kinase	1,55E-04	ENO1,GAPDH,LDHA
BMPR1B	kinase	1,30E-03	COL2A1,POSTN,SERPINE1	25 (7)
KDR	kinase	3,63E-03	A2M,ANXA2,NME1
MAPK3	kinase	2,41E-03	CSTA,FN1,THBS1,TIMP1	127 (17)
MAP2K3	kinase	2,68E-03	COL1A1,COL1A2,COL3A1,SERPINE1	136 (21)
PRKCB	kinase	1,16E-03	CYCS,FN1,MMP2,SERPINE1	106 (20)
PGK1	kinase	1,42E-03	MMP2,VIM	25 (4)
PDPK1	kinase	1,45E-03	A2M,CST3,SERPINE1	111 (16)
MAP3K4	kinase	4,91E-02	MMP2
MAPK1	kinase	2,55E-05	CSTA,CTSB,FN1,HBB,IGFBP7,KRT17,LAMA4,LGALS3BP,LMNA,MMP2,NT5E,VIM	121 (17)
ERBB2	kinase	2,82E-11	ANXA2,CLEC11A,COL1A1,COL3A1,COL5A1,COL6A1,COL6A2,COL6A3,CTSB,FN1,FSTL1,IGFBP3,IGFBP6,JUP,LAMB1,LUM,PDIA4,PRDX2,SERPINE1,SPARC,TAGLN,TGFBI,THBS1,TPM1,VCL,VIM	100 (20)
CDKN1B	kinase	1,42E-02	B2M,HSPA5,S100A9,SERPINE1
ILK	kinase	3,27E-02	FN1,MMP2
RET	kinase	2,98E-04	ANXA1,COL1A1,COL1A2,CTSB,HSPA8,S100A9	60 (8)
MST1R	kinase	9,74E-03	ARG1,VIM
FLT1	kinase	3,45E-04	ACTN4,FLNA,GDI2,THBS1,YWHAZ
PODXL	kinase	3,30E-02	VIM
TGFBR2	kinase	5,47E-08	BGN,COL1A1,COL1A2,FN1,JUP,MMP2,SERPINE1,SPARC,TAGLN,THBS1,TIMP1,VCL	86 (17)
NME1	kinase	4,53E-04	CTSD,MMP2,SERPINE1,TIMP1	114 (20)
CSNK2A1	kinase	3,12E-05	FN1,JUP,VIM	90 (7)
CLCN5	ion channel	9,04E-05	B2M,CTSB,TXN
CACNA1C	ion channel	1,02E-03	ANXA2,ENO1
CNGB3	ion channel	4,91E-02	HSPA5
ITGAV	ion channel	3,50E-07	COL1A1,COL1A2,FN1,MMP2,SERPINE1,TIMP1	102 (21)
CLCA2	ion channel	4,34E-03	FN1,VIM
TRPV4	ion channel	1,02E-03	COL2A1,THBS1,TIMP1	60 (7)
TRPV6	ion channel	4,91E-02	KRT10
FGF16	growth factor	3,30E-02	MMP2
BDNF	growth factor	1,36E-06	ANXA2,ANXA5,APEX1,FLNA,HSPA5,ITIH3,LAMC1,S100A9,SPARC,TAGLN,VASN,VIM,YWHAG
IGF2	growth factor	1,21E-02	FN1,IGFBP3,IGFBP6,SERPINE1,TGFBI
HDGF	growth factor	2,07E-04	COL1A1,SERPINE1
IGF1	growth factor	1,60E-10	A2M,BGN,C4A/C4B,CLEC11A,COL1A1,COL2A1,COL3A1,CTSD,FN1,GAPDH,HBB,HSPA5,IGFBP3,IGFBP6,MMP2,PCOLCE,SERPINE1,TGFBI,THBS1,VIM	120 (21)
AGT	growth factor	1,53E-07	BGN,CALR,CAT,COL1A1,COL1A2,COL3A1,COL6A1,FN1,GSS,HSPG2,IGFBP3,LAMB1,MMP2,PFN1,POSTN,SERPINE1,TIMP1	103 (21)
GDF2	growth factor	5,90E-03	COL1A1,POSTN,SERPINE2,SERPINF1
INHBB	growth factor	7,97E-06	COL3A1,SERPINE1,THBS1,TIMP1	39 (6)
PDGFB	growth factor	5,84E-06	COL1A1,COL1A2,FN1,MMP2,THBS1,TIMP1	116 (18)
FGF3	growth factor	2,41E-03	KRT5,MMP2
VEGFA	growth factor	1,79E-05	COL1A1,CST3,CTSB,FN1,LMNA,MMP2,NME1,SERPINE1,SPARC,THBS1	119 (20)
INHBA	growth factor	1,47E-04	ACTN1,FN1,MMP2,S100A8,S100A9,SERPINE1,TAGLN,TIMP1	98 (22)
LEP	growth factor	3,34E-06	COL1A1,COL2A1,COL3A1,GAPDH,GNAS,GOT2,HSPA5,IGFBP3,MMP2,PRDX1,SERPINE1,SPARC,THBS1,TIMP1,VIM	110 (17)
TGFA	growth factor	3,05E-02	ALB,SERPINE1,VIM
GDF9	growth factor	3,82E-02	HSPG2,PTX3
BMP4	growth factor	2,69E-02	COL2A1,POSTN,SPARC,TAGLN
FGF1	growth factor	2,63E-03	AFP,ALB,POSTN,THBS1,TTR	70 (12)
INHA	growth factor	2,11E-07	COL1A2,COL3A1,COL6A1,COMP,KRT19,LMNA,MMP2,PTX3,SERPINE1
GH1	growth factor	1,97E-07	ALB,C3,CAT,COL3A1,FN1,HBB,IGFBP3,JUP,PRDX1,TKT,VIM,YWHAZ	104 (15)
NRG1	growth factor	2,10E-03	ACTN1,COL1A1,COL6A3,FSTL1,GPI,VCL,VIM	115 (15)
FGF10	growth factor	9,92E-03	ANXA1,ANXA2,CTSB
WISP2	growth factor	1,63E-07	DSP,FN1,IGFBP7,JUP,SERPINE1,SPARC,VIM
ANGPT2	growth factor	4,48E-13	CALR,CAT,COL1A1,COL1A2,COL3A1,FN1,HSPA5,MFGE8,MMP2,NME1,P4HB,PDIA3,POSTN,SERPINE1,SERPING1,THBS1,VIM	115 (21)
DKK1	growth factor	9,41E-03	COL1A1,SPARC,TAGLN
FGF8	growth factor	3,87E-02	CYCS,SPARC,THBS1
GDNF	growth factor	1,79E-02	CTSB,FN1,RPSA
FGF2	growth factor	1,24E-11	AFP,ALB,BGN,COL1A1,COL1A2,COL3A1,ENO1,FLNA,FN1,IGFBP3,LMNA,MMP2,S100A8,SERPINE1,SPARC,TAGLN,THBS1,TIMP1,VIM,YWHAZ	111 (21)
CTGF	growth factor	1,44E-08	AFP,COL1A1,COL2A1,COL4A2,ENO1,FN1,MMP2,SERPINE1,SPARC,TIMP1	115 (21)
TGFB1	growth factor	1,59E-28	ACTN1,AFP,ALB,ANXA2,APOB,ARG1,B2M,BGN,CALM1 (includes others),CASP14,CAT,CFL1,CHI3L1,COL12A1,COL1A1,COL1A2,COL2A1,COL3A1,COL4A2,COL5A1,COL6A1,COL6A2,COL6A3,COMP,CST3,CTSB,CTSD,DSP,FLNA,FN1,GNAS,HSPA5,HSPG2,IGFBP3,IGFBP6,IGFBP7,ITIH3,JUP,KRT10,KRT14,KRT17,KRT19,LAMC1,LDHA,MMP2,MSN,NME1,NT5E,PNP,POSTN,PRDX4,PTX3,S100A11,SEMA7A,SERPINE1,SERPINE2,SPARC,TAGLN,TGFBI,THBS1,TIMP1,TIMP2,TPM1,VCL,VIM,YWHAE	121 (22)
ANGPTL3	growth factor	3,30E-02	HSPG2
NOV	growth factor	7,88E-04	COL1A1,MMP2,SERPINE1	127 (23)
FGF18	growth factor	4,91E-02	TIMP1
GDF5	growth factor	3,30E-02	COL1A1
KITLG	growth factor	3,07E-03	B2M,IGFBP3,LTF,MMP2,PGLS,PSMB5,RPLP0
BMP7	growth factor	7,63E-05	COL1A1,COL1A2,FN1,IGFBP3,IGFBP6,MMP2,SERPINE1	89 (19)
BMP6	growth factor	6,65E-03	SERPINE1,TAGLN,TIMP1,VCL
HGF	growth factor	5,01E-13	A2M,AFP,AKAP13,CALM1 (includes others),COL1A1,COL1A2,COL2A1,COL3A1,DSG1,FLNA,FN1,IGFBP3,KRT17,KRT19,LDHA,MMP2,NID2,PGAM1,S100A9,SERPINE1,TAGLN2,THBS1,TIMP1,VIM,YWHAZ	107 (17)
EGF	growth factor	8,60E-17	ACTN1,AFP,COL1A1,COL1A2,COL3A1,CTSD,FN1,FSTL1,IGFBP3,KRT16,KRT19,KRT5,LDHA,LTF,MMP2,PPIB,PSMB1,PSMB2,PSMB4,PSMB5,PSMB6,S100A11,S100A9,SERPINE1,SPARC,THBS1,TIMP1,VCL,VIM	119 (19)
CLEC11A	growth factor	1,16E-03	ALDOA,ANXA1,LDHA,TKT
GDF10	growth factor	8,36E-03	SERPINE1
BMP2	growth factor	2,20E-04	COL1A1,COL1A2,COL2A1,FN1,POSTN,SPARC,TAGLN,TIMP1	69 (20)
JAG1	growth factor	2,28E-02	COL1A1,TAGLN
TGFB3	growth factor	5,80E-11	COL1A1,COL1A2,COL2A1,COL3A1,COL5A1,FN1,MMP2,SERPINE1,SERPINE2,TAGLN,THBS1,TPM1	91 (18)
TGFB2	growth factor	1,31E-08	COL1A1,COL1A2,COL3A1,FN1,HSPG2,S100A8,SERPINE1,TAGLN,THBS1,TIMP1	127 (21)
AMELX	growth factor	3,30E-02	COL2A1
PDGFC	growth factor	2,54E-05	COL1A2,COL4A2,TIMP1,TIMP2
TEAD	group	4,91E-02	FN1
opioid receptor	group	1,67E-02	TXN
Sos	group	1,60E-03	CAT,CHI3L1,GM2A,KRT13,LGALS3BP,PFN1,YWHAZ
Notch	group	3,13E-03	AFP,MMP2,S100A11,TAGLN	71 (7)
Pdgfr	group	2,99E-03	FN1,VIM	85 (11)
Creb	group	4,58E-02	ARG1,CTSB,GNAS,KRT1,MMP2
arginase	group	3,30E-02	ARG1
Pkg	group	4,28E-04	PRDX2,TXN,VCL
Tgf beta	group	7,82E-13	BGN,COL1A1,COL1A2,FN1,FSTL1,HSPG2,IGFBP3,KRT1,KRT16,MMP2,POSTN,SERPINE1,SPARC,TAGLN,TGFBI,TIMP1,TIMP2,VIM	93 (17)
ERK1/2	group	1,65E-11	B2M,CALR,CAT,CLEC11A,COL1A1,COL2A1,COL3A1,CTSB,ENO1,HSPA5,IGFBP3,KRT17,MMP2,POSTN,PSMB6,SERPINE1,TIMP1,TIMP2	126 (22)
P38 MAPK	group	3,70E-05	ANXA5,BGN,COL3A1,FLNA,FN1,HSPA5,MMP2,POSTN,SERPINE1,THBS1,TIMP1,TIMP2	97 (20)
STAT	group	3,64E-02	A2M,TIMP1
ADCY	group	1,08E-02	COL3A1,TXN
Pkc(s)	group	1,06E-05	COL3A1,CTSB,FN1,HSP90B1,HSPA5,MMP2,P4HB,PDIA4,S100A8,SERPINE1	94 (21)
MAP2K1/2	group	1,60E-03	C3,CHI3L1,HSPA5,VIM
apyrase	group	4,11E-02	MMP2
Pld	group	3,30E-02	FN1
Ras	group	1,99E-02	MMP2,PRDX1,SERPINE1,SERPINE2
Ubiquitin	group	7,15E-05	HSP90B1,HSPA5,MMP2,TIMP2	60 (9)
Tropomyosin	group	2,49E-02	TPM1
Tnf receptor	group	7,88E-04	C3,SERPINE1,TIMP1	89 (13)
IL1	group	8,89E-07	ALB,C3,CHI3L1,COL1A1,COL2A1,CTSB,FN1,LAMB1,LYZ,MMP2,S100A9,SERPINE1,SPARC,TIMP1	114 (24)
FKHR	group	1,67E-02	A2M
Ikb	group	1,44E-02	HSPA5,KRT6B
Jnk	group	5,00E-06	A2M,ANXA5,COL1A1,COL3A1,FN1,HSPA5,MMP2,POSTN,SERPINE1,TIMP1	100 (20)
Histone h3	group	3,92E-02	AFP,B2M,COL1A2,GAPDH,IGFBP3,PSMA2,TAGLN
Mek	group	4,56E-02	COL1A2,SERPINE1,THBS1,VIM
Rock	group	6,71E-03	COL1A1,COL3A1,FN1	102 (21)
Vegf	group	1,84E-04	A2M,AKAP13,CALM1 (includes others),CHI3L1,FLNA,FN1,IGFBP3,MMP2,NID2,TIMP1,VIM,YWHAZ	129 (19)
Rar	group	2,93E-02	ARG1,SERPINF1
ETS	group	5,91E-04	CHI3L1,SERPINE1,TIMP1
Akt	group	1,30E-04	A2M,COL3A1,CTSD,FN1,LMNA,MMP2,PTX3,SERPINE1,THBS1	127 (22)
Sod	group	6,80E-03	DSG1,MMP2
Metalloprotease	group	3,30E-02	FN1
Nuclear factor 1	group	1,09E-04	ALDOA,CHI3L1,COL1A1,GSS
Tcf 1/3/4	group	1,13E-05	AHSG,ALB,TTR
Ho	group	4,11E-02	SPARC
Angiotensin II receptor type 1	group	8,71E-03	SERPINE1,TIMP1	63 (7)
Insulin	group	1,24E-04	ALB,ALDOA,COL1A1,FN1,HSP90B1,HSPA5,IGFBP3,LGALS3BP,MMP2,SERPINE1,TGFBI	116 (19)
ERK	group	2,34E-05	ACTN1,BGN,COL1A1,COL3A1,FN1,LAMB1,MMP2,SERPINE1,THBS1,TIMP1	116 (17)
Lamin b	group	8,36E-03	LMNA
Alpha catenin	group	1,46E-23	BGN,COL1A1,COL1A2,COL3A1,COL5A1,COL6A1,COL6A2,COL6A3,CTSB,FSTL1,IGFBP6,IGFBP7,KRT6B,LAMA4,LUM,LYZ,MMP2,PTX3,S100A8,S100A9,TIMP1,VIM	76 (9)
Igf	group	4,11E-02	FN1
Growth hormone	group	4,33E-03	ALB,COL1A1,FN1,IGFBP3,IGFBP6	117 (21)
Focal adhesion kinase	group	1,09E-04	DSP,KRT14,MMP2,TAGLN	68 (6)
estrogen receptor	group	9,06E-14	ANXA1,C3,COL12A1,COL4A2,COL5A1,COL6A1,COL6A2,DSP,FN1,JUP,KRT19,LTF,MSN,NT5E,SERPINE1,SPARC,TIMP1,TIMP2,VIM	87 (9)
Collagen Alpha1	group	9,04E-05	COL1A1,MMP2,TIMP2	70 (7)
hyaluronidase	group	1,67E-02	FN1
Csf	group	4,11E-02	C3
PDGF (family)	group	3,23E-07	CALR,P4HB,PDIA3,VIM
TCF	group	9,09E-05	AKAP13,APOD,KRT5,MMP2,RCN1,SERPINA5	50 (4)
FZD8	g-protein coupled receptor	5,10E-03	COL1A1,FN1	106 (11)
F2R	g-protein coupled receptor	1,27E-02	FN1,TAGLN,THBS1
GPER1	g-protein coupled receptor	7,73E-03	HSPA5,LTF
C3AR1	g-protein coupled receptor	3,10E-02	C3,HSPA5
CCKBR	g-protein coupled receptor	1,08E-02	KRT19,SPARC
MC4R	g-protein coupled receptor	1,20E-02	PSMA2,PSMA4
DRD4	g-protein coupled receptor	3,30E-02	GNAS
PTGER2	g-protein coupled receptor	1,10E-02	SERPINE1,THBS1,TIMP1,TIMP2
ADORA2A	g-protein coupled receptor	1,03E-04	COL3A1,COL6A1,GAPDH,GPI,P4HB,PGAM1,SPARC
AGTR1	g-protein coupled receptor	3,63E-03	COL3A1,FN1,SERPINE1	104 (20)
CXCR3	g-protein coupled receptor	7,73E-03	COL1A1,FN1	104 (11)
ADORA2B	g-protein coupled receptor	3,09E-03	COL1A2,SERPINE1,TIMP1	101 (18)
RHO	g-protein coupled receptor	1,14E-04	B2M,COL1A2,NT5E,PCOLCE,SERPING1
ADRB1	g-protein coupled receptor	1,32E-05	COL3A1,GNAS,HSPA5,THBS1	73 (11)
CCR1	g-protein coupled receptor	1,30E-03	MMP2,SPARC,VIM
ADRB2	g-protein coupled receptor	4,02E-02	COL1A1,GNAS
SMO	g-protein coupled receptor	3,38E-05	BGN,COL4A2,HBB,KRT5,LUM,S100A8	51 (5)
CCR2	g-protein coupled receptor	2,13E-04	ARG1,FN1,MMP2,TIMP1,TIMP2	117 (22)
NCF1	enzyme	5,92E-03	FN1,SERPINE1	108 (24)
ALKBH5	enzyme	7,99E-05	AKAP13,CTSD,HSPA8,PRDX4,RPLP0,SERPINA5
RHOJ	enzyme	5,05E-04	ACTG1,ANXA1,CALU
MGEA5	enzyme	8,14E-08	ACTG1,ACTN4,AZGP1,FLNA,FN1,IGFBP3,IGFBP7,KRT6C,LAMB1,PRDX4,SERPINE2,TGFBI,THBS1,TIMP1,TIMP2,VIM
DOHH	enzyme	1,02E-03	NME1,PRDX2
CHI3L1	enzyme	1,30E-03	COL6A1,COL6A2,SERPINE1
NOP58	enzyme	2,49E-02	LTF
CYB5R4	enzyme	4,91E-02	HSPA5
GALNT6	enzyme	2,49E-02	FN1
PNPLA8	enzyme	1,88E-03	HSP90B1,HSPA5	3 (2)
CHD5	enzyme	2,49E-02	VIM
EDEM1	enzyme	2,49E-02	HSPA5
ENTPD5	enzyme	6,84E-04	COL1A1,COL1A2
ENTPD2	enzyme	3,30E-02	SERPINE1
PRMT6	enzyme	4,11E-02	THBS1
PLCL2	enzyme	3,30E-02	SPARC
NDST2	enzyme	3,30E-02	FN1
FH	enzyme	1,20E-04	APOD,LDHA,TKT
GALNT3	enzyme	4,11E-02	FN1
RAB23	enzyme	3,30E-02	COL2A1
KDM4B	enzyme	1,67E-02	VIM
CA4	enzyme	7,15E-05	HSPA5,KRT13,KRT4,TGM3
NCEH1	enzyme	1,67E-02	HSPA5
RECQL4	enzyme	2,49E-02	HBB
IDH2	enzyme	5,10E-03	FN1,VIM
RRM2	enzyme	3,30E-02	THBS1
XDH	enzyme	2,26E-04	MMP2,SERPINE1,TIMP2,VIM	109 (19)
IRS1	enzyme	5,97E-04	COL3A1,COL4A2,COL6A1,COL6A3,LAMA4,TGFBI
RAP1B	enzyme	1,67E-02	FN1
ALDH2	enzyme	1,32E-02	GSS,PSAT1
H6PD	enzyme	4,91E-02	HSPA5
BAG6	enzyme	1,42E-03	COL1A1,SERPINE1
CYP2E1	enzyme	1,20E-02	CAT,COL1A2
PLCG1	enzyme	5,10E-03	SERPINE1,THBS1	77 (10)
ALDH1A2	enzyme	5,68E-09	BGN,COL1A2,COL3A1,PCOLCE,SPARC,TGFBI,TIMP1	65 (7)
CAT	enzyme	5,49E-05	COL1A1,SERPINE1,THBS1,TIMP1,VIM	124 (20)
SOD2	enzyme	8,35E-03	CAT,MMP2,SERPINE1,YWHAZ	119 (19)
LOXL2	enzyme	2,41E-03	FN1,VIM
UBA2	enzyme	8,36E-03	ALB
IDH1	enzyme	3,45E-02	FN1,VIM
ACOX1	enzyme	2,14E-04	ANXA2,CAT,COL4A2,HSPA5,LGALS3BP,MFGE8,TAGLN2
RAG2	enzyme	1,57E-02	COL6A2,NT5E
FN1	enzyme	1,65E-08	ACTN4,COL1A1,CTSD,FLNA,FN1,GDI2,MMP2,SERPINE1,SPARC,TAGLN,THBS1,TIMP2,YWHAZ	110 (20)
SUMO1	enzyme	1,44E-02	ALB,HBB
SPTLC2	enzyme	1,09E-07	COL1A1,HSPA5,MMP2,THBS1,TIMP1	60 (7)
HSD11B2	enzyme	3,30E-02	COL1A1
HAO1	enzyme	2,49E-02	HSPA5
RLIM	enzyme	6,61E-05	FN1,SERPINE1,VIM
SUMO2	enzyme	3,82E-02	HSPA8,PNP
TERT	enzyme	1,19E-04	B2M,CALU,JUP,KRT19,MFGE8,MMP2,VIM
CD44	enzyme	2,67E-06	BGN,CALR,COL1A1,COL3A1,FN1,LAMB1,LAMC1,MMP2,THBS1,VIM	96 (21)
PHGDH	enzyme	2,49E-02	MMP2
DICER1	enzyme	6,71E-04	AFP,APOD,SERPINE1,SERPINF1,SPARC,THBS1,VIM	86 (7)
MRAS	enzyme	4,11E-02	VIM
P4HB	enzyme	2,07E-04	PDIA3,PDIA4
YWHAZ	enzyme	6,80E-03	HSP90B1,HSPA5
RALBP1	enzyme	4,66E-05	COL1A2,GAPDH,MMP2
FECH	enzyme	2,76E-02	COL3A1,COL6A3
NPR1	enzyme	6,13E-05	COL1A1,COL3A1,FN1,MMP2	49 (7)
LIPE	enzyme	9,36E-06	COL1A1,COL1A2,GAPDH,JUP,POSTN,PRDX2,TKT,YWHAG	87 (7)
KRAS	enzyme	1,31E-11	ALDOA,B2M,BGN,COL1A1,COL3A1,FN1,FSTL1,HSPA5,MMP2,NT5E,PCOLCE,PDIA3,PRDX4,PSMA7,RPSA,SERPINE2,SPARC,THBS1,TIMP2,VIM	106 (20)
CD38	enzyme	6,86E-06	ALDOA,ANXA2,ANXA6,IGHG1,NT5E,PRDX4,PSAT1,TPI1,VIM
GPI	enzyme	6,80E-03	FN1,VIM
TGM2	enzyme	3,00E-03	C3,FN1,GM2A,MMP2,S100A8,SEMA7A,THBS1	93 (16)
RNF111	enzyme	4,91E-02	SERPINE1
WFS1	enzyme	4,11E-02	HSPA5
ACOT8	enzyme	8,36E-03	CAT
EFEMP1	enzyme	2,49E-02	VIM
GNA12	enzyme	4,17E-04	MMP2,PSMB5,TAGLN,VCL,VIM
PIN1	enzyme	7,48E-04	COL3A1,FN1,MMP2,TIMP1	109 (21)
RAC1	enzyme	2,07E-04	COL1A2,COL2A1,FN1,KRT14,KRT6B,MMP2	99 (19)
HAT1	enzyme	1,67E-02	KRT14
RAC2	enzyme	4,95E-04	ALDOA,ANXA1,LDHA,TKT
MSH2	enzyme	1,42E-03	IGHG1,IGKC
LOX	enzyme	1,20E-02	COL3A1,KRT10
SAT1	enzyme	5,92E-03	GAPDH,IGFBP3
FBXO32	enzyme	5,43E-03	CALR,HSPA5,KRT19,PDIA3
PTGS1	enzyme	3,45E-02	ARG1,MMP2
OGT	enzyme	3,64E-02	JUP,VIM
CTBP1	enzyme	1,62E-03	COL1A2,JUP,THBS1
TIAM2	enzyme	1,67E-02	VIM
CA9	enzyme	4,91E-02	COL2A1
FKBP5	enzyme	4,91E-02	ARG1
GPD1	enzyme	4,43E-02	ANXA2,PSAT1,SERPINE2
PTGS2	enzyme	2,10E-03	ANXA1,ANXA2,CTSD,FN1,IGFBP3,MMP2	122 (18)
DIO3	enzyme	2,18E-03	COL6A1,ITIH3,SEMA7A
NAGLU	enzyme	1,67E-02	LYZ
ADA	enzyme	1,45E-03	COL1A2,SERPINE1,TIMP1	51 (7)
TXNDC5	enzyme	1,67E-02	CTSB
WWOX	enzyme	1,08E-02	COL1A1,TIMP2
TDG	enzyme	4,11E-02	APEX1
MOGAT1	enzyme	2,49E-02	TIMP1
DROSHA	enzyme	2,49E-02	THBS1
HSPG2	enzyme	5,92E-03	APOB,COL2A1
SMPD1	enzyme	4,34E-03	COL1A1,CTSB
VCP	enzyme	4,91E-02	HSPA5
TAZ	enzyme	1,09E-05	ANXA1,FN1,KRT5,LUM,SERPINE1,TAGLN
PPID	enzyme	4,91E-02	VIM
HSPA5	enzyme	1,09E-04	HSP90B1,HSPA5,HSPA8,P4HB	5 (2)
ICMT	enzyme	5,22E-05	ACTN4,FSTL1,LMNA,TGFBI
SMURF2	enzyme	5,10E-03	FN1,SERPINE1	58 (16)
RECQL	enzyme	2,49E-02	HBB
NOS2	enzyme	3,77E-06	AZGP1,CHI3L1,CYCS,IGHG1,KRT13,KRT4,LGALS3BP,S100A8,TIMP1,TKT
RND3	enzyme	6,80E-03	MMP2,VIM
SDCBP	enzyme	5,10E-03	PEBP1,VIM
ANXA1	enzyme	2,59E-02	ANXA1,ANXA2
RAB7A	enzyme	2,49E-02	VIM
HRAS	enzyme	1,41E-23	A2M,ACTG1,AFP,ANXA2,ANXA6,B2M,CALU,COL1A1,COL1A2,COL2A1,COL3A1,COL6A2,CSTA,CTSB,CTSZ,FLNA,FN1,FSTL1,HSPA8,IGKC,JUP,KRT16,KRT19,LGALS7/LGALS7B,LYZ,MFGE8,MMP2,NID2,P4HB,PFN1,POSTN,SERPINE1,SERPINE2,SPARC,TAGLN,THBS1,VCL,VIM	121 (19)
PDIA6	enzyme	6,95E-05	HSP90B1,HSPA5
AGXT	enzyme	1,67E-02	COL3A1
NOX4	enzyme	1,44E-02	FN1,MMP2
UBE2I	enzyme	1,20E-02	ALB,HBB
PLCL1	enzyme	4,11E-02	SPARC
CTH	enzyme	2,49E-02	HSPA5
RHOA	enzyme	4,43E-04	COL1A1,COL3A1,CTSD,FN1,TAGLN	104 (15)
PLA2G5	enzyme	1,88E-03	COL1A2,COL3A1
SUV39H1	enzyme	7,73E-03	CAT,HBB
PARK7	enzyme	5,92E-03	TXN,VIM
GAPDH	enzyme	3,10E-02	ENO1,GAPDH
HNRNPAB	enzyme	4,34E-03	HBB,VIM
MYH9	enzyme	3,30E-02	VCL
PARK2	enzyme	3,10E-02	PRDX1,PRDX2
CETP	enzyme	7,73E-03	APOB,HSPA5	41 (4)
ACO1	enzyme	3,64E-03	GAPDH,IGFBP3
LAMB2	enzyme	1,67E-02	LAMB1
PTGES	enzyme	9,41E-03	ANXA1,ANXA2,VIM
DNM2	enzyme	2,49E-02	MMP2
CYBA	enzyme	2,99E-03	FN1,SERPINE1	67 (12)
GNA15	enzyme	9,29E-03	C3,CYCS,TAGLN,TIMP1
SOD1	enzyme	6,53E-03	APEX1,B2M,COL1A1,GNAS,HSPA8,PSMB5
IL17C	cytokine	2,43E-02	S100A8,S100A9
SPRED2	cytokine	8,36E-03	VIM
FAM3B	cytokine	1,15E-06	FN1,IGFBP3,KRT19,LDHA,SPARC	51 (7)
CNTF	cytokine	3,05E-02	A2M,TIMP1,VIM
TSLP	cytokine	3,27E-02	NME1,TIMP1
IL23A	cytokine	2,76E-02	S100A8,S100A9
CXCL8	cytokine	3,45E-04	ANXA1,COL12A1,HSPG2,MMP2,TPM1
CSF1	cytokine	1,33E-02	ARG1,FN1,HSP90B1,HSPA5,THBS1
PRL	cytokine	7,21E-24	A2M,ANXA2,ANXA5,B2M,COL1A1,COL1A2,COL3A1,COL5A1,CST3,CTSB,CTSD,ENO1,FN1,IGFBP3,KRT14,KRT19,KRT5,LAMC1,MFGE8,MSN,P4HB,PCOLCE,PDIA4,RPSA,SPARC,TIMP1,TIMP2,VIM,YWHAG	125 (23)
TNFSF12	cytokine	1,01E-03	CYCS,PTX3,S100A8,S100A9,TIMP1	74 (10)
WNT1	cytokine	5,97E-04	FN1,ISLR,KRT19,KRT5,KRT6B,SERPINE1	61 (7)
IL11	cytokine	8,08E-04	A2M,ANXA2,COL2A1,TIMP1
CTF1	cytokine	2,43E-02	A2M,TIMP1
IL10	cytokine	9,47E-03	ARG1,COL1A1,CTSB,CTSZ,MMP2,PTX3,S100A8,TIMP1	113 (19)
IL5	cytokine	1,52E-08	A2M,ALDOA,ANXA2,ANXA6,ENO1,HSP90B1,HSPA5,IGHG1,LUM,PRDX4,PSAT1,PSMB4,QSOX1,TPI1,VIM
IL24	cytokine	4,02E-02	HSP90B1,HSPA5
CCL1	cytokine	2,99E-03	MMP2,SERPINE1	86 (7)
Il3	cytokine	1,94E-02	LTF,LYZ,YWHAG
IL3	cytokine	6,77E-03	CALR,CAT,CLEC11A,GNAS,HSP90B1,HSPA5,PSMA5,YWHAG	52 (7)
WNT5A	cytokine	2,43E-04	COL1A1,COL2A1,FLNA,FN1,SPARC,VIM	105 (19)
IL4	cytokine	1,34E-11	ANXA2,ANXA6,ARG1,C3,COL1A1,COL1A2,COL6A2,COL6A3,DSC1,DSG1,FN1,IGHG1,KRT1,KRT10,LGALS3BP,MMP2,PNP,POSTN,PSMA2,PSMA6,S100A8,S100A9,SERPINB3,SERPINB6,SERPINE1,TGFBI,TIMP1,TIMP2,VIM	103 (17)
SPP1	cytokine	1,73E-05	ARG1,COL1A1,DSP,FN1,MMP2,SERPINE1,SERPINF1,TIMP1,VIM	129 (21)
CCL2	cytokine	2,33E-02	MMP2,SERPINE1,TIMP1
CSF3	cytokine	2,69E-03	ARG1,CST3,CTSD,LTF,LYZ,MMP2	102 (11)
CCL20	cytokine	1,67E-02	POSTN
CXCL12	cytokine	3,70E-03	AFP,FLNA,FN1,IGFBP7,MMP2,VIM	116 (18)
IL22	cytokine	6,65E-03	KRT1,KRT17,S100A8,S100A9	35 (4)
CX3CL1	cytokine	1,57E-02	MMP2,TIMP1
IL17A	cytokine	2,36E-04	C3,COL1A1,KRT17,MMP2,S100A8,TIMP1,TIMP2,YWHAG	86 (17)
IL2	cytokine	2,98E-04	C3,CYCS,GAPDH,HSP90B1,HSPA5,MMP2,NME1,PDIA3,PNP,PSMB1,TIMP1,TPI1,VIM	52 (5)
TNF	cytokine	1,94E-20	ALB,ANXA1,ARG1,B2M,BGN,C3,CALR,CASP14,CAT,CHI3L1,CLEC11A,COL1A1,COL1A2,COL2A1,COL3A1,CTSB,CTSZ,DCD,FN1,GM2A,HSPA8,HSPG2,IGFBP3,IGFBP6,IGKC,JUP,KRT6B,LAMA4,LAMC1,LDHA,MMP2,NME1,P4HB,PDIA4,POSTN,PSMA2,PTX3,RCN3,RPSA,S100A8,S100A9,SERPINB8,SERPINE1,SERPINE2,SERPINF1,SPARC,TAGLN,TALDO1,THBS1,TIMP1,TIMP2,TXN,VCL,VIM,YWHAG	109 (18)
CRH	cytokine	1,45E-02	CLEC11A,KRT1,KRT14
IL1A	cytokine	7,74E-05	APOD,HSPG2,LDHA,MMP2,PTX3,S100A8,S100A9,SERPINE1,SPARC	101 (16)
IL13	cytokine	4,68E-10	ARG1,C3,CHI3L1,COL1A1,COL1A2,COL3A1,COL6A2,CTSB,KRT16,MMP2,POSTN,QSOX1,S100A8,SERPINB3,SERPINE1,SERPINF1,THBS1,TIMP1,TIMP2	132 (17)
IFNB1	cytokine	8,84E-05	ANXA5,CLSTN1,COL12A1,LAMB1,MMP2,NID2,THBS1,TIMP1,TIMP2,VCL	40 (7)
TIMP1	cytokine	1,79E-03	IGFBP3,MMP2,TIMP2
LIF	cytokine	2,38E-02	A2M,AFP,AHSG,FN1,TIMP1
IL15	cytokine	7,27E-08	ACTN4,ANXA1,CALM1 (includes others),GAPDH,GDI2,GNAS,HSPA8,NME1,PDIA3,PDIA4,PFN1,PNP,PRDX4,PSMA5,S100A11,TIMP1
IFNG	cytokine	1,83E-11	A2M,ARG1,AZGP1,B2M,C3,C4A/C4B,CAT,COL1A1,COL1A2,CTSB,CTSD,CTSZ,FN1,GNAS,HSPA8,HSPG2,IGHG1,KRT14,KRT17,KRT19,LAMC1,LGALS3BP,MMP2,PPIA,PRDX2,PSMA2,PSMA4,PSMA6,PTX3,S100A8,S100A9,SEMA7A,SERPINA5,SERPINE1,SERPING1,THBS1,TIMP1	100 (16)
CXCL16	cytokine	4,91E-02	FN1
IFNA2	cytokine	3,79E-02	ANXA1,B2M,GNAS,LGALS3BP,NT5E
MIF	cytokine	2,09E-02	COL1A1,MMP2,TIMP1
EPO	cytokine	3,21E-02	B2M,CTSZ,HBB,MMP2,RPLP0,TPI1
EDN1	cytokine	3,70E-15	ANXA1,ANXA5,ANXA6,COL1A2,COL5A1,COMP,CST3,FN1,HSPA5,HSPA8,MMP2,MSN,RPSA,SERPINE1,THBS1,TIMP1,VCL,VIM,YWHAE	107 (18)
IL6	cytokine	1,75E-10	A2M,AFP,ALB,ANXA1,APOB,ARG1,BGN,C3,COL1A1,COL2A1,COL3A1,CST3,FN1,HSPA5,IGFBP3,IGFBP6,KRT14,LTF,LYZ,MMP2,S100A9,SERPINE1,THBS1,TIMP1,TTR,VIM	110 (22)
OSM	cytokine	7,95E-17	A2M,AFP,ALB,ANXA1,ANXA2,ARG1,B2M,CAT,CHI3L1,COL2A1,COL3A1,COL6A1,FN1,HSPA5,IGFBP6,KRT16,KRT17,KRT19,KRT2,KRT9,MMP2,PRDX2,QSOX1,S100A8,S100A9,SERPINB8,SERPINE1,SERPING1,TIMP1,TPM1	130 (22)
IL1B	cytokine	1,85E-14	A2M,ANXA1,APOB,ARG1,BGN,C3,CAT,CHI3L1,COL1A1,COL2A1,CTSB,CTSZ,FN1,GM2A,GNAS,HSPG2,IGFBP3,IGFBP6,KRT19,LDHA,MMP2,P4HB,PGAM1,POSTN,PTX3,RPSA,S100A8,S100A9,SERPINE1,SPARC,THBS1,TIMP1,TIMP2,VIM	98 (15)
PPBP	cytokine	3,64E-03	COL6A3,SERPINE1
SCGB1A1	cytokine	7,73E-03	C3,FN1	66 (8)
WNT3A	cytokine	5,98E-04	BGN,CALR,CLEC11A,COL1A1,COL2A1,FN1,SPARC,THBS1	113 (19)
PI3K (complex)	complex	5,63E-04	COL1A1,CTSD,FN1,MMP2,NME1,POSTN,PRDX2,SERPINE1,THBS1	121 (22)
CaMKII	complex	1,20E-02	ARG1,COL2A1
TCR	complex	3,49E-03	APOD,CTSB,FLNA,HSP90B1,HSPA5,NME1,P4HB,PDIA4	73 (7)
RNA polymerase II	complex	3,00E-04	ARG1,B2M,COL1A2,ENO1,GAPDH,HBB,IGFBP3,MMP2,TXN
CD3	complex	7,89E-10	ACTN4,ANXA1,CALM1 (includes others),CYCS,GAPDH,GDI2,GNAS,HSP90B1,HSPA5,HSPA8,IGFBP6,KRT14,MMP2,NME1,P4HB,PDIA4,PFN1,PGAM1,PNP,PRDX4,PSMA5,PSMA6,S100A11,THBS1
Fibrin	complex	3,08E-05	COL2A1,FN1,SERPINE1,TAGLN	101 (16)
F Actin	complex	2,07E-04	FLNA,MMP2
TFIIH	complex	2,49E-02	COL6A1
Pdgf (complex)	complex	1,22E-03	FN1,MMP2,SERPINE1,SPARC,TIMP1	103 (19)
Stat1-Stat3	complex	2,49E-02	A2M
Stat5 dimer	complex	4,91E-02	IGFBP3
PDGF BB	complex	1,20E-08	C3,CALM1 (includes others),COL3A1,CYCS,FLNA,FN1,GSS,LMNA,MMP2,PCOLCE,POSTN,PSMB4,SERPINE1,TAGLN,THBS1,TIMP1	115 (21)
Pdgfra-Pdgfrb	complex	1,67E-02	TIMP1
Smad2/3-Smad4	complex	1,04E-05	COL1A1,COL1A2,IGFBP3,SERPINE1
Ap1	complex	4,65E-07	FN1,GSS,HBB,HSP90B1,IGFBP3,KRT6B,MMP2,SERPINE1,SPARC,TIMP1	113 (13)
AMPK	complex	1,29E-02	CAT,LDHB,SERPINE1,VIM
Esr1-Estrogen-Sp1	complex	2,49E-02	CTSD
IFN alpha receptor	complex	4,11E-02	COL1A2
NFkB (complex)	complex	9,80E-06	A2M,C3,COL1A2,COL2A1,FN1,GNAS,IGKC,KRT17,KRT19,KRT6B,LGALS7/LGALS7B,MMP2,PTX3,SERPINE1,TIMP1,TIMP2,VIM	99 (16)
LDL	complex	8,19E-04	C3,HSP90B1,HSPA5,IGFBP3,MMP2,NME1,S100A8,SERPINE1	101 (16)
Ifn gamma	complex	3,66E-02	CHI3L1,COL1A1,FN1
T3-TR-RXR	complex	4,61E-02	COL6A3,ENO1
Smad	complex	1,16E-03	COL1A1,COL1A2,SERPINE1	24 (6)
IgG	complex	1,32E-09	B2M,C3,CALR,COL3A1,DSP,FN1,GNAS,HSPA5,KRT10,KRT13,KRT16,LGALS7/LGALS7B,SERPINE1	77 (14)
FSH	complex	4,27E-04	ACTN1,CLEC11A,GNAS,IGFBP3,MMP2,SERPINE1,THBS1,TIMP1,TIMP2,TPM1,VCL	91 (20)
IL17R	complex	4,28E-04	S100A8,S100A9,TIMP1
Collagen(s)	complex	3,61E-05	C3,C4A/C4B,FN1,PSAT1,THBS1	25 (4)
Integrin alpha 3 beta 1	complex	2,49E-02	MMP2
Laminin	complex	2,28E-05	COL1A1,FN1,RPSA,SERPINE1,VIM	125 (19)
BCR (complex)	complex	1,64E-02	CALR,HSP90B1,HSPA5,IGHG1
Eif2	complex	2,49E-02	HSPA5
Cg	complex	2,68E-02	B2M,GM2A,IGFBP3,LGALS3BP,MMP2,PTX3,TIMP1
Collagen type I	complex	1,98E-04	COL1A1,FN1,MMP2,TIMP2,VIM	122 (23)
Lh	complex	4,87E-03	ACTN1,GNAS,MMP2,PTX3,THBS1,TPM1,VCL	98 (12)
VLDL	complex	3,30E-02	SERPINE1
Immunoglobulin	complex	1,44E-02	CALR,CTSZ,MMP2,S100A8,S100A9,TIMP1
Collagen type IV	complex	7,08E-07	MMP2,SERPINE1,TAGLN,THBS1,TIMP2	65 (9)
3-methyladenine	chemical toxicant	2,43E-02	HSP90B1,HSPA5
isobutylmethylxanthine	chemical toxicant	6,52E-03	GAPDH,MMP2,SERPINE1,TIMP1,TIMP2	98 (15)
pirinixic acid	chemical toxicant	1,94E-11	AFP,AHSG,ANXA2,C3,CAT,COL1A1,CTSB,GAPDH,GOT2,LDHB,PSMA2,PSMA3,PSMA4,PSMA5,PSMA7,PSMB1,PSMB4,PSMB5,PSMB6,SERPINE1,TALDO1,TXN	37 (3)
bucladesine	chemical toxicant	3,49E-03	ANXA1,IGFBP3,IGFBP6,MMP2,QSOX1,SERPINE1,TIMP1,TIMP2	87 (15)
nitrofen	chemical toxicant	4,02E-02	ENO1,TIMP2
alpha-amanitin	chemical toxicant	1,96E-04	COL1A1,CTSD,HBB
2,2,2-trichloroethanol	chemical toxicant	1,67E-02	TIMP1
trichloroethylene	chemical toxicant	8,91E-06	COL1A1,COL3A1,IGFBP3,MFGE8,SPARC,YWHAQ
dichlorvos	chemical toxicant	8,36E-03	PPIA
hexachlorobenzene	chemical toxicant	1,05E-09	A2M,ANXA1,ANXA2,C4A/C4B,MMP2,RCN1,S100A11,TIMP1,VIM	46 (5)
cigarette smoke	chemical toxicant	3,90E-04	C3,CAT,COL4A2,HSPA5,MMP2,PRDX1,SERPINE1,TIMP1	99 (21)
ristocetin	chemical toxicant	1,67E-02	YWHAZ
reactive oxygen species	chemical toxicant	1,74E-02	APEX1,CAT,HSPA5,SERPINE1
3,4,5,3',4'-pentachlorobiphenyl	chemical toxicant	4,77E-03	CAT,COL1A1,CYCS,IGFBP3	78 (7)
paraquat	chemical toxicant	2,53E-03	CAT,COL1A1,FN1,TIMP1,TXN	104 (16)
dimethylnitrosamine	chemical toxicant	3,61E-05	COL1A1,COL1A2,COL3A1,TIMP1,VIM	119 (17)
methylmercury	chemical toxicant	1,89E-05	COL1A1,COL3A1,IGFBP3,MFGE8,SPARC,YWHAQ
cytochalasin D	chemical toxicant	3,77E-04	COL2A1,MMP2,RPLP0,TIMP2	50 (7)
Congo Red	chemical toxicant	4,91E-02	C3
methoxychlor	chemical toxicant	1,88E-03	HSP90B1,LTF
3-nitropropionic acid	chemical toxicant	8,04E-05	GAPDH,GPI,LDHA,LDHB,TPI1	90 (5)
ochratoxin A	chemical toxicant	1,84E-02	COL3A1,TIMP1
naphthalene	chemical toxicant	4,11E-02	KRT14
2,3,4,7,8-pentachlorodibenzofuran	chemical toxicant	9,41E-03	CAT,COL1A1,CYCS
4-methylnitrosoamino-1-(3-pyridinyl)-1-butanone	chemical toxicant	2,76E-02	ANXA1,TKT
n-nitrosomethylbenzylamine	chemical toxicant	1,09E-03	ACTN4,ANXA2,GSS,KRT14,MSN,PSMA6
tetrachlorodibenzodioxin	chemical toxicant	6,03E-05	ACTN1,COL6A1,CTSD,HSPA8,KRT14,KRT19,KRT4,NME1,S100A8,S100A9,SERPINE1,TXN	78 (6)
bongkrekic acid	chemical toxicant	2,49E-02	CYCS
chlordecone	chemical toxicant	2,07E-04	HSPA5,LTF
mono-(2-ethylhexyl)phthalate	chemical toxicant	1,03E-05	ENO1,GAPDH,GPI,MDH1,TALDO1,TIMP2,TKT,TPI1,VCL
thioacetamide	chemical toxicant	3,28E-12	ANXA1,ANXA2,BGN,C4A/C4B,COL1A1,COL1A2,COL3A1,FSTL1,IGFBP3,LGALS3BP,MMP2,PCOLCE,RCN1,S100A11,SPARC,TAGLN,TIMP1,TIMP2	109 (12)
chrysotile asbestos	chemical toxicant	1,84E-02	CTSZ,TIMP1
p-dimethylaminoazobenzene	chemical toxicant	1,67E-02	ALB
malondialdehyde	chemical toxicant	4,91E-02	COL1A1
methylnitrosourea	chemical toxicant	2,93E-02	PSMA7,TIMP2
benzo(a)pyrene	chemical toxicant	3,85E-02	ANXA1,IGFBP6,SERPINE1,THBS1,TKT
carbon tetrachloride	chemical toxicant	6,88E-06	APOB,CAT,COL1A1,COL1A2,COL3A1,FN1,IGFBP6,MMP2,TIMP1,TIMP2	124 (18)
rottlerin	chemical toxicant	3,98E-03	COL1A1,COL3A1,MMP2,PRDX1	100 (20)
sodium arsenate	chemical toxicant	1,67E-02	PRDX1
cadmium chloride	chemical toxicant	6,05E-05	ALB,ANXA5,HSPA5,IGFBP6,TXN
Am 580	chemical toxicant	2,93E-02	APOD,TIMP1
4-hydroxynonenal	chemical toxicant	2,93E-02	CTSB,SERPINE1
benzene	chemical toxicant	8,91E-06	COL1A1,COL3A1,IGFBP3,MFGE8,SPARC,YWHAQ
bromobenzene	chemical toxicant	3,02E-04	ACTN4,GAPDH,HSPA5,TIMP1,YWHAQ
microcystin-LR	chemical toxicant	3,30E-02	MMP2
thapsigargin	chemical toxicant	1,31E-05	AHSG,CALR,COL1A1,COL2A1,FN1,HSP90B1,HSPA5,VCL,VIM	83 (14)
forskolin	chemical toxicant	1,33E-09	ACTN1,AKAP13,ALDOA,CALM1 (includes others),CALR,CASP14,COL1A1,FN1,GNAS,IGFBP3,IGFBP6,LTF,MFGE8,NT5E,PRDX1,PRDX2,S100A8,SERPINE1,TAGLN2,THBS1,TIMP1,TPM1,VCL,VIM	91 (19)
caffeic acid phenethyl ester	chemical toxicant	9,96E-03	CTSB,IGFBP6,MMP2,VIM	123 (18)
6-hydroxydopamine	chemical toxicant	2,57E-08	C3,CALR,HSPA5,HSPA8,P4HB,PDIA3,PPIB,PSMB2,TIMP2
arsenic	chemical toxicant	2,13E-02	KRT1,LTF
glyphosate	chemical toxicant	2,49E-02	S100A9
ethionine	chemical toxicant	3,10E-04	ANXA1,C4A/C4B,S100A11,TIMP1
phorbol 12,13-didecanoate	chemical toxicant	2,13E-02	CYCS,KRT14
ethidium	chemical toxicant	2,97E-04	SERPINE1,TIMP1,TIMP2	63 (7)
nickel	chemical toxicant	1,32E-02	GAPDH,SERPINE1
cadmium	chemical toxicant	2,62E-06	ALB,B2M,C3,HBB,HSPA5,SERPINF1,TIMP1
ATP-gamma-S	chemical reagent	1,86E-02	C3,PRDX2,THBS1
5-N-ethylcarboxamido adenosine	chemical reagent	2,19E-04	ALB,ARG1,COL1A2,NT5E,SERPINE1,THBS1	75 (12)
2-chloroadenosine	chemical reagent	1,88E-03	MMP2,TIMP1
CP-55940	chemical reagent	4,02E-02	GAPDH,YWHAZ
8-bromo-cAMP	chemical reagent	3,40E-03	ARG1,CLEC11A,CTSD,SERPINE1,TIMP1,TIMP2	82 (19)
Diphtheria Toxin	chemical reagent	2,97E-04	COL1A2,COL3A1,CTSD
polyglactin 910	chemical reagent	8,36E-03	MMP2
T 0070907	chemical reagent	3,64E-03	COL1A1,COL1A2	57 (7)
G2535	chemical reagent	4,11E-02	VIM
2-bromoethylamine	chemical reagent	1,63E-07	A2M,ANXA1,ANXA2,C4A/C4B,S100A11,TIMP1,VIM
3-(p-methoxy)phenyl-1,4-benzoxazine	chemical reagent	1,67E-02	COL1A1
TO-901317	chemical reagent	2,09E-05	ALB,APOD,C3,ENO1,GPI,PSMA5,PSMA7,PSMB2,TIMP1,TKT	59 (7)
pyridoxal phosphate-6-azophenyl-2',4'-disulfonic acid	chemical reagent	4,11E-02	THBS1
azetidyl-2-carboxylic acid	chemical reagent	1,20E-04	HSP90B1,HSPA5,HSPA8
polyhydroxyethyl methacrylate	chemical reagent	8,36E-03	CALR
diphenyleneiodonium	chemical reagent	1,16E-03	COL1A1,FN1,SERPINE1,TIMP1	127 (19)
A23187	chemical reagent	3,13E-04	CALR,CYCS,FN1,HSP90B1,HSPA5,SERPINE1	100 (19)
BAPTA-AM	chemical reagent	4,86E-03	COL1A1,FN1,MMP2	129 (21)
ethylene glycol tetraacetic acid	chemical reagent	3,82E-02	COL2A1,HSPA5
hexamethylene bisacetamide	chemical reagent	3,91E-03	FN1,HSPA8,RPL18
dithiothreitol	chemical reagent	2,13E-02	HSP90B1,HSPA5
NS-398	chemical reagent	6,99E-05	COL1A2,MMP2,PRDX1,PSMB5,S100A8,S100A9
cycloheximide	chemical reagent	2,30E-11	AFP,ALB,ALDOA,APOB,B2M,CALR,CAT,COL1A1,COL2A1,COL5A1,FN1,GNAS,IGFBP6,LDHA,MMP2,PTX3,S100A8,SERPINE1,THBS1,TIMP1	111 (20)
cibacron blue F 3GA	chemical reagent	2,49E-02	THBS1
1,2-dithiol-3-thione	chemical reagent	8,01E-22	ACTG1,ALDOA,CTSD,HSP90B1,LMNA,PDIA3,PDIA4,PPIB,PRDX1,PSAT1,PSMA2,PSMA4,PSMA5,PSMA6,PSMA7,PSMB1,PSMB2,PSMB4,PSMB5,PSMB6,RPL18,RPLP0,TPI1,TTR,TXN	31 (2)
fenamic acid	chemical reagent	1,12E-07	A2M,ANXA1,ANXA2,C4A/C4B,RCN1,S100A11,TIMP1,VIM
GW9662	chemical reagent	3,35E-02	FN1,HSPA5,YWHAE
SB-431542	chemical reagent	6,53E-05	BGN,COL1A1,FN1,IGFBP7,MMP2,SERPINE1	100 (16)
synthetic peptide	chemical reagent	8,36E-03	SPARC
pyrrolidine dithiocarbamate	chemical reagent	1,18E-02	ANXA1,COL1A1,MMP2,SERPINE1
tiron	chemical reagent	2,41E-03	HSPA5,PRDX2
tert-butyl-hydroquinone	chemical reagent	4,37E-03	GSS,HSPA5,HSPA8,SERPINE1	43 (7)
sodium orthovanadate	chemical reagent	2,76E-02	COL1A1,SERPINE1
potassium cyanide	chemical reagent	2,07E-04	TIMP1,TIMP2
ruthenium red	chemical reagent	3,30E-02	COL2A1
DETA-NONOate	chemical reagent	5,49E-05	BGN,CAT,S100A8,SERPINE1,TIMP1	79 (18)
tretinoin tocoferil	chemical reagent	2,49E-02	CAT
trinitrobenzenesulfonic acid	chemical reagent	8,91E-07	COL1A1,COL1A2,COL3A1,LUM,PTX3,S100A8,S100A9,TIMP1	80 (10)
N-formyl-Met-Leu-Phe	chemical reagent	5,20E-03	ACTN1,MSN,TAGLN2
farnesol	chemical reagent	5,91E-04	HSP90B1,HSPA5,PDIA4
N-acetylsphingosine	chemical reagent	3,23E-05	CAT,COL1A1,COL1A2,COL3A1,SERPINE1	104 (22)
bufalin	chemical reagent	1,28E-07	HSPA5,MMP2,RPLP0,YWHAG,YWHAQ,YWHAZ
R5020	chemical reagent	1,65E-02	CTSD,LGALS3BP,TIMP2
metribolone	chemical reagent	1,34E-03	ACTN1,AZGP1,B2M,MMP2,PPIB,THBS1,TIMP2	87 (12)
U73122	chemical reagent	4,53E-04	FN1,HSPA5,MMP2,TPM1	91 (16)
tributyrin	chemical drug	2,15E-03	AZGP1,HSPA5,KRT17,KRT6B
beraprost	chemical drug	6,61E-05	COL1A1,COL3A1,FN1
cloprostenol	chemical drug	3,30E-02	TIMP1
bromodeoxyuridine	chemical drug	9,92E-03	IGFBP3,SERPINE1,TGFBI
brivudine	chemical drug	2,49E-02	APEX1
allopurinol	chemical drug	3,55E-08	A2M,ANXA1,ANXA2,C4A/C4B,CAT,RCN1,S100A11,TIMP1,VIM
5-fluorouracil	chemical drug	5,18E-14	ALDOA,ANXA2,CALU,COL1A2,CYCS,GAPDH,GOT2,HSPA8,LDHA,MDH1,PSMA6,PSMA7,PSMB1,PSMB2,PSMB5,RPL18,SERPINB6,THBS1,TPI1
bosentan	chemical drug	1,44E-02	COL1A2,MSN
darusentan	chemical drug	4,11E-02	COL3A1
dextran sulfate	chemical drug	1,06E-04	ARG1,C3,C4A/C4B,MMP2,S100A8,S100A9,SERPINE1,THBS1,TIMP2	112 (20)
streptozocin	chemical drug	1,97E-07	ALB,CAT,COL12A1,COL1A1,COL3A1,FN1,GNAS,HSPG2,MMP2,NT5E,SERPINE1,VIM	118 (21)
etoposide	chemical drug	4,06E-02	COL1A2,CTSD,CYCS,PEBP1
calcipotriene	chemical drug	8,71E-03	KRT10,KRT16
17-alpha-ethinylestradiol	chemical drug	1,22E-03	APOB,C3,KRT14,KRT19,KRT4,NME1
estradiol benzoate	chemical drug	1,94E-02	C3,HSPA8,PDIA3
corticosteroid	chemical drug	4,41E-02	CST3,POSTN
glucocorticoid	chemical drug	6,44E-05	AFP,ANXA1,CLEC11A,COL1A1,FN1,IGFBP3,KRT14,KRT17,KRT5,SERPINE1	97 (16)
nilotinib	chemical drug	5,68E-06	COL1A1,COL1A2,FN1
prednisolone	chemical drug	6,91E-04	ARG1,CAT,CTSB,GM2A,HSPA8,IGHG1,PRDX1,PRDX2
dexamethasone	chemical drug	1,82E-19	ACTG1,AFP,AKAP13,ALB,ANXA1,APOD,B2M,BGN,C3,CALR,CAT,CFL1,CHI3L1,CLEC11A,COL1A1,COL4A2,COL6A1,COL6A2,CST3,CTSB,CTSD,FN1,GAPDH,HSPA5,HSPA8,IGFBP3,IGFBP6,KRT17,LAMA4,LAMC1,LDHA,LGALS3BP,MFGE8,MMP2,PEBP1,POSTN,PSMA2,PTX3,RPLP0,S100A8,S100A9,SERPINE1,SERPINE2,SERPINF1,SPARC,TAGLN,TGFBI,THBS1,TIMP1,TIMP2,TPM1,TTR,TXN,VCL	131 (20)
fluticasone	chemical drug	1,73E-05	BGN,C3,CHI3L1,MFGE8,S100A8,SERPINE1,SERPINF1,THBS1,TIMP1
dasatinib	chemical drug	2,97E-04	COL1A1,COL1A2,FN1	121 (19)
resatorvid	chemical drug	4,11E-02	CAT
aliskiren	chemical drug	2,49E-02	FN1
norethindrone acetate	chemical drug	4,11E-02	SERPINE1
benfotiamine	chemical drug	2,49E-02	TKT
methapyrilene	chemical drug	1,69E-10	A2M,ACTG1,ALB,ALDOA,ANXA2,ANXA5,CAT,CST3,CTSB,GSS,HSPA5,TTR,YWHAZ
vitamin E	chemical drug	1,60E-03	CAT,COL2A1,MMP2,SERPINE1	79 (14)
artemether	chemical drug	8,36E-03	MMP2
triclosan	chemical drug	8,71E-03	COL1A1,TIMP1
rasagiline	chemical drug	4,02E-02	CAT,YWHAG
obeticholic acid	chemical drug	2,43E-04	COL1A1,TIMP1,TIMP2	8 (2)
etretinate	chemical drug	6,84E-04	KRT1,KRT16
crizotinib	chemical drug	8,36E-03	VIM
grape seed extract	chemical drug	1,62E-03	ENO1,HSPA8,VIM
levocetirizine	chemical drug	8,36E-03	MMP2
avobenzone	chemical drug	8,36E-03	COL1A1
vanillyl-N-nonylamide	chemical drug	4,91E-02	HSPA5
BMS-690514	chemical drug	3,10E-02	CYCS,HSPA8
fluoroquinolone	chemical drug	2,49E-02	MMP2
dietary fat derivative	chemical drug	2,49E-02	APOB
anthralin	chemical drug	2,29E-06	KRT1,KRT16,KRT2
SLV320	chemical drug	1,67E-02	COL1A1
gentamicin	chemical drug	1,52E-07	APEX1,C4A/C4B,CALR,CTSD,HBB,HSP90B1,HSPA5,IGFBP3,NME1,PDIA4,PSAT1,TIMP1,TTR
2-(3-chlorophenylamino)phenylacetic acid	chemical drug	2,49E-02	FN1
black raspberry extract	chemical drug	1,55E-02	ACTN4,ANXA2,MSN,PSMA6
methylamphotericin B	chemical drug	2,49E-02	TIMP1
ruxolitinib	chemical drug	1,67E-02	COL1A1
dinaciclib	chemical drug	1,67E-02	HSPA5
panobinostat	chemical drug	1,30E-03	FLNA,VIM,YWHAZ
pictilisib	chemical drug	4,11E-02	LDHA
black cohosh extract	chemical drug	8,36E-03	SERPINE1
glucuronyl glucosamine glycan sulfate	chemical drug	5,75E-07	COL3A1,FN1,HSPG2	64 (7)
CTS-1027	chemical drug	1,67E-02	COL1A1
riociguat	chemical drug	2,07E-04	SERPINE1,TIMP1	63 (7)
crocin	chemical drug	3,30E-02	HSPA5
ponesimod	chemical drug	1,88E-03	SERPINE1,THBS1
farnesyltransferase inhibitor	chemical drug	3,30E-02	COL1A2
tyrosine kinase inhibitor	chemical drug	8,36E-03	FN1
p38 MAP kinase inhibitor	chemical drug	3,30E-02	COL1A1
bleomycin	chemical drug	8,54E-07	COL1A1,COL1A2,COL3A1,CTSD,FN1,MMP2,MSN,SERPINE1,TIMP1,TIMP2	119 (18)
vatalanib	chemical drug	3,64E-03	COL1A1,TIMP1	49 (7)
green tea polyphenol	chemical drug	2,84E-03	ANXA1,IGFBP3,MMP2	70 (8)
silibinin	chemical drug	2,29E-04	FN1,IGFBP3,MMP2,TIMP2,VIM	133 (23)
gentamicin C	chemical drug	9,54E-07	A2M,ANXA1,ANXA2,C4A/C4B,S100A11,TIMP1,VIM
ciprofloxacin	chemical drug	2,25E-03	ACTN1,CTSD,MFGE8,MMP2,VIM
econazole	chemical drug	1,67E-02	HSPA5
ciglitazone	chemical drug	4,37E-03	CAT,FN1,MMP2,SERPINE1	101 (17)
candesartan	chemical drug	5,40E-04	COL1A2,COL3A1,FN1,SERPINE1	71 (17)
diethylstilbestrol	chemical drug	1,30E-05	C3,COMP,HSP90B1,IGFBP3,IGFBP6,KRT13,LTF,MFGE8,S100A8,SPARC	50 (5)
sirolimus	chemical drug	4,28E-17	ANXA5,ARG1,B2M,COL1A1,COL1A2,CYCS,ENO1,FN1,HSP90B1,HSPA5,LDHA,LDHB,MMP2,POSTN,PPIA,PSMA3,PSMA4,PSMA6,PSMB1,PSMB4,PSMB6,RPL18,RPLP0,RPSA,SERPINE1,TIMP1,TPI1,VIM	98 (21)
dantrolene	chemical drug	4,91E-02	HSPA5
BO-653	chemical drug	2,29E-06	PSMA2,PSMA3,PSMA4
halofuginone	chemical drug	1,40E-10	BGN,C4A/C4B,COL1A1,COL1A2,FSTL1,IGFBP3,LGALS3BP,MMP2,PCOLCE,SPARC,TAGLN,TIMP1,TIMP2	86 (16)
cetrorelix	chemical drug	5,92E-03	ANXA5,RPSA
doxycycline	chemical drug	1,65E-02	COL3A1,MMP2,TIMP1
nedocromil sodium	chemical drug	2,41E-03	COL3A1,MMP2
carboxyamido-triazole	chemical drug	3,30E-02	MMP2
mitoxantrone	chemical drug	1,57E-02	COL1A1,COL1A2
PD 123319	chemical drug	1,45E-03	COL1A1,SERPINE1,TIMP1	34 (10)
cyclophosphamide	chemical drug	3,92E-04	C4A/C4B,CAT,S100A11,THBS1,TIMP1	40 (6)
methamphetamine	chemical drug	2,25E-02	MMP2,TIMP2,TXN
imatinib	chemical drug	4,17E-03	COL1A1,COL3A1,FN1,IGKC	95 (19)
gefitinib	chemical drug	2,54E-04	C3,COL1A1,CTSB,HSP90B1,LTF,S100A9,TIMP2	46 (4)
verapamil	chemical drug	4,21E-02	ANXA2,ENO1
carvedilol	chemical drug	1,20E-02	MMP2,TIMP2
tamoxifen	chemical drug	2,67E-04	C3,CAT,CTSD,GAPDH,HSP90B1,IGFBP3,PFN1,TAGLN,TXN	63 (6)
tacrolimus	chemical drug	1,23E-03	APOD,COL1A1,COL2A1,COL3A1,FLNA,FN1,NME1	92 (17)
BMS-275183	chemical drug	8,36E-03	THBS1
enalapril	chemical drug	9,37E-04	A2M,C4A/C4B,SERPINE1,TIMP1	66 (7)
resiquimod	chemical drug	9,78E-06	CAT,GM2A,LMNA,MSN,PRDX1,PSMB2,PSMB4,PTX3,YWHAB
ephedrine	chemical drug	1,67E-02	TXN
clorgyline	chemical drug	8,36E-03	GNAS
sorafenib	chemical drug	1,57E-02	HSPA5,VIM
linsidomine	chemical drug	2,76E-02	ALB,ANXA2
chloroquine	chemical drug	5,92E-03	CTSD,NT5E,TXN
pimagedine	chemical drug	3,35E-03	ALB,LAMB1,SERPINE1
sarpogrelate	chemical drug	1,67E-02	SERPINE1
methiothepin	chemical drug	1,67E-02	SERPINE1
tempol	chemical drug	2,39E-03	CAT,CYCS,SERPINE1
phenethyl isothiocyanate	chemical drug	2,07E-03	GSS,MMP2,PSMA6,QSOX1,TXN
sibutramine	chemical drug	6,95E-05	APOB,SERPINE1
rosiglitazone	chemical drug	2,21E-09	AHSG,ARG1,C3,C4A/C4B,CAT,COL1A1,CYCS,FN1,GAPDH,HSPA5,IGFBP6,POSTN,S100A8,S100A9,SERPINE1,SERPINF1,THBS1,TIMP1,YWHAE	135 (21)
methimazole	chemical drug	3,45E-02	IGFBP3,PRDX1
celecoxib	chemical drug	1,74E-02	CASP14,HSPA5,MMP2,SERPINE1
methacholine	chemical drug	2,49E-02	FN1
raloxifene	chemical drug	1,46E-02	LAMB1,LUM,MMP2,SERPINE1,TIMP1
GW501516	chemical drug	4,57E-11	APOD,CAT,COL5A1,COL6A1,IGFBP3,IGFBP6,KRT19,KRT4,LTF,S100A8,S100A9,THBS1
acetazolamide	chemical drug	4,91E-02	HSPA5
acetaminophen	chemical drug	4,48E-09	A2M,ACTG1,ALB,APEX1,CAT,HSPA5,IGFBP3,PRDX1,SERPINF1,TTR,TXN,YWHAZ
tanespimycin	chemical drug	4,67E-06	CALM1 (includes others),CYCS,HSP90B1,HSPA5,HSPA8,LDHA,PSMA7,SERPINE1	9 (2)
bortezomib	chemical drug	4,94E-11	CALR,HSPA5,IGFBP3,IGKC,PSMA2,PSMA3,PSMA4,PSMA5,PSMA6,PSMA7,PSMB1,PSMB2,PSMB4,PSMB5,PSMB6,VIM	60 (6)
fluoxetine	chemical drug	3,80E-03	GNAS,MMP2,NME1,TAGLN
metformin	chemical drug	1,05E-03	AHSG,APOB,FN1,HSPA5,SERPINE1,SERPINF1	110 (20)
emricasan	chemical drug	4,91E-02	COL1A1
phenylbutazone	chemical drug	3,64E-08	A2M,ANXA1,ANXA2,C4A/C4B,RCN1,S100A11,TIMP1,VIM
indomethacin	chemical drug	1,44E-08	A2M,ANXA1,ANXA2,C4A/C4B,CTSD,MMP2,P4HB,PSMB5,RCN1,S100A11,S100A8,TIMP1,VIM,YWHAE	112 (18)
bicalutamide	chemical drug	4,21E-02	MMP2,VIM
trichostatin A	chemical drug	5,56E-06	AFP,ANXA6,ARG1,B2M,COL1A2,COL2A1,COL6A3,HBB,IGFBP3,JUP,KRT6B,PSMB2,TAGLN,THBS1,TIMP1,TIMP2,VIM	96 (17)
lestaurtinib	chemical drug	4,11E-02	LYZ
nafoxidine	chemical drug	8,36E-03	C3
sulforafan	chemical drug	3,65E-03	KRT17,PSMB5,TALDO1,TKT,VIM
deferoxamine	chemical drug	4,38E-04	ALDOA,ENO1,IGFBP3,LDHA,MMP2,SERPINE1,SERPINE2	127 (20)
PD 153035	chemical drug	2,54E-05	COL1A2,HSPA5,KRT13,KRT14
nitrofurantoin	chemical drug	1,37E-21	A2M,ACTG1,ALB,ANXA2,ANXA5,APEX1,C3,C4A/C4B,CAT,COL2A1,CST3,CTSB,GSS,HSPA5,IGFBP3,KRT19,PRDX1,PRDX2,S100A11,TIMP1,TTR,TXN,YWHAZ
irbesartan	chemical drug	1,98E-02	SERPINE1,SERPINF1
pioglitazone	chemical drug	2,24E-03	AHSG,APOB,CAT,FN1,KRT19,SERPINE1	119 (13)
dipyridamole	chemical drug	4,28E-04	MMP2,TIMP1,TIMP2	90 (9)
atenolol	chemical drug	4,11E-02	B2M
hydroxyurea	chemical drug	1,51E-03	HBB,KRT1,KRT16,KRT2
sulindac sulfide	chemical drug	2,82E-03	KRT19,LDHA,PGAM1,YWHAE
losartan potassium	chemical drug	2,93E-07	COL1A1,COL3A1,CST3,FN1,HSPA5,MMP2,POSTN,SERPINE1,TIMP1	101 (22)
talarozole	chemical drug	1,67E-02	KRT10
liarozole	chemical drug	3,30E-02	KRT16
Y 27632	chemical drug	6,80E-07	ACTG1,COL2A1,MMP2,SERPINE1,TAGLN,THBS1,VIM	115 (19)
pirfenidone	chemical drug	1,04E-05	CAT,COL3A1,FN1,POSTN
fasudil	chemical drug	4,86E-03	ARG1,MMP2,TAGLN
entinostat	chemical drug	1,92E-03	IGFBP3,MMP2,SERPINE1,TXN	111 (21)
oxaliplatin	chemical drug	3,27E-02	ANXA2,VIM
thalidomide	chemical drug	2,59E-02	COL1A1,SERPINE1
methotrexate	chemical drug	1,89E-09	ACTG1,ALB,ALDOA,APEX1,C3,CLEC11A,CYCS,GAPDH,GPI,IGFBP3,PPIA,PRDX1,S100A11,SERPING1,TTR
troglitazone	chemical drug	8,42E-05	ANXA2,C3,CFL1,COL1A1,COL1A2,FN1,HSPA5,KRT13,KRT14,LAMA4,SERPINE1,TALDO1	99 (19)
captopril	chemical drug	1,29E-08	A2M,ANXA1,BGN,C4A/C4B,IGFBP6,POSTN,S100A11,SERPING1,TIMP1
cilazapril	chemical drug	3,30E-02	COL3A1
carboplatin	chemical drug	8,45E-03	A2M,TIMP1,VIM
sodium dodecyl sulfate	chemical drug	1,88E-03	KRT1,SERPINE2
WR 1065	chemical drug	2,13E-02	CAT,NME1
eprosartan	chemical drug	7,01E-08	COL1A1,COL3A1,FN1,SERPINE1	16 (4)
vorinostat	chemical drug	2,04E-03	CTSD,HSPA5,MFGE8,MMP2,TXN,VIM	114 (19)
paricalcitol	chemical drug	3,09E-03	COL3A1,FN1,TIMP1	63 (7)
trovafloxacin	chemical drug	2,54E-03	B2M,PSMA5,SERPINE1,THBS1
natamycin	chemical drug	2,49E-02	TIMP1
(-)-isoproterenol	chemical drug	3,30E-02	MMP2
risedronic acid	chemical drug	1,02E-03	HSPA8,PDIA3
clodronic acid	chemical drug	1,84E-02	ARG1,MFGE8
cerivastatin	chemical drug	4,71E-04	COL1A1,FN1,S100A8,S100A9,SERPINE1	104 (21)
atorvastatin	chemical drug	5,97E-04	APOB,CAT,COL1A1,MMP2,POSTN,SERPINE1	123 (19)
simvastatin	chemical drug	3,00E-04	AHSG,ANXA1,APOB,IGFBP3,MMP2,SERPINE1,TIMP1,VIM	105 (17)
calcitriol	chemical drug	1,41E-06	ALB,ANXA2,C3,COL4A2,FN1,GAPDH,IGFBP3,KRT6A,LTF,S100A8,S100A9,SERPINB6,TAGLN2,THBS1,TXN,VCL	78 (14)
2-amino-1-methyl-6-phenylimidazo-4-5-b-pyridine	chemical drug	7,55E-08	HSPA5,HSPA8,PSMA2,PSMA6,PSMB1,PSMB2,PSMB4
triamterene	chemical drug	7,83E-08	A2M,ANXA1,ANXA2,C4A/C4B,RCN1,S100A11,TIMP1,VIM
bexarotene	chemical drug	2,16E-03	CYCS,IGFBP6,KRT17,S100A9,SPARC
olanzapine	chemical drug	8,97E-03	COL1A2,HSPA8,S100A8,S100A9
lomustine	chemical drug	6,12E-08	A2M,ANXA1,ANXA2,C4A/C4B,RCN1,S100A11,TIMP1,VIM
phenacetin	chemical drug	1,29E-06	A2M,ANXA1,ANXA2,S100A11,TIMP1,VIM
fingolimod	chemical drug	9,41E-03	COL3A1,FN1,SERPINE1	105 (21)
emodin	chemical drug	4,86E-03	FN1,HSPA5,VIM	86 (9)
(+)-MK-801	chemical drug	2,25E-02	ALDOA,HSPA5,TIMP1
MT-21	chemical drug	8,36E-03	CYCS
etodolac	chemical drug	2,49E-02	THBS1
ramipril	chemical drug	6,24E-15	COL1A1,COL1A2,COL3A1,COL4A2,FN1,LAMB1,LAMC1,MMP2,TIMP1,TIMP2
semaxinib	chemical drug	2,18E-03	ARG1,LTF,THBS1
amlodipine	chemical drug	2,97E-04	ANXA2,COL1A1,ENO1
resveratrol	chemical drug	3,26E-02	FN1,HSPA5,IGFBP3,MMP2,PSMB5,SERPINE1
probucol	chemical drug	2,54E-05	PSMA2,PSMA3,PSMA4,SERPINE1
propofol	chemical drug	3,63E-03	ANXA1,MMP2,THBS1	111 (17)
4-hydroxytamoxifen	chemical drug	2,53E-05	C3,CTSD,GM2A,IGFBP3,KRT13,KRT19,S100A9,TPM1	64 (6)
epigallocatechin-gallate	chemical drug	1,86E-05	APOB,CASP14,CAT,FN1,JUP,MMP2,PDIA4,SERPINE1,TIMP1,VIM	140 (23)
salirasib	chemical drug	7,33E-05	COL5A1,LDHA,PGAM1,SERPINE1,TPI1
mycophenolate mofetil	chemical drug	2,49E-02	FN1
ferrous sulfate	chemical drug	3,30E-02	LCN1
zinc sulfate	chemical drug	4,34E-03	C3,COL5A1
arsenic trioxide	chemical drug	5,26E-03	CST3,FN1,HSPA5,MSN,S100A8	72 (7)
cisplatin	chemical drug	7,10E-14	A2M,ALB,ANXA1,ANXA2,ANXA5,C4A/C4B,CAT,COL1A1,CTSB,FN1,GOT2,HSPA5,IGFBP3,KRT10,KRT19,LAMB1,LDHB,LMNA,LYZ,MMP2,PEBP1,PPIA,RCN1,S100A11,SERPINE1,THBS1,TIMP1,VIM,YWHAZ	123 (20)
potassium chloride	chemical drug	7,02E-04	CALR,HSP90B1,HSPA5,PDIA3,PDIA4	72 (7)
sodium hypochlorite	chemical drug	8,36E-03	APEX1
acyclic retinoid	chemical drug	3,59E-04	COL1A2,COL4A2,TIMP2
CD 437	chemical drug	1,60E-07	ALDOA,ENO1,GNAS,HSPA8,NME1,PDIA3,PFN1,PGAM1,PSMA4,PSMB1,TXN,YWHAZ
alitretinoin	chemical drug	8,89E-03	ANXA5,APOD,CYCS,FN1,LTF
formoterol	chemical drug	1,55E-04	CALR,PSMA3,PSMA4
trientine	chemical drug	2,22E-06	COL3A1,FN1,IGFBP3,SERPINE1
lanreotide	chemical drug	1,67E-02	IGFBP3
actinomycin D	chemical drug	2,42E-07	AFP,ALB,CLEC11A,COL1A2,COL2A1,FLNA,FN1,GAPDH,GPI,MMP2,PTX3,SERPINE1	136 (21)
buserelin	chemical drug	3,30E-02	ANXA5
androgen	chemical drug	6,51E-05	APOD,C4A/C4B,CALR,COL12A1,COL4A2,CTSB,CTSZ,FLNA
doxorubicin	chemical drug	8,23E-13	A2M,AFP,ALB,ANXA1,ANXA2,APEX1,C4A/C4B,CAT,COL3A1,CTSB,CTSD,GSS,IGFBP6,IGFBP7,LGALS3BP,MMP2,PRDX1,RCN1,S100A11,TIMP1,TXN,VIM	135 (21)
plicamycin	chemical drug	1,57E-04	COL1A1,COL1A2,SEMA7A,SERPINE1,SERPINE2,TIMP1	57 (12)
andrographolide	chemical drug	2,93E-02	FN1,TIMP1
zeaxanthin	chemical drug	2,07E-04	MMP2,TIMP1
betulinic acid	chemical drug	1,30E-03	MMP2,TIMP1,TIMP2	71 (13)
genistein	chemical drug	6,10E-06	A2M,APOB,ARG1,C3,CAT,COL1A1,CTSB,CTSD,GM2A,HSPA5,KRT14,LTF,MMP2,SERPINE1	111 (15)
nicotine	chemical drug	4,27E-07	ALDOA,ENO1,FN1,HSPA8,KRT10,MMP2,POSTN,RPSA,SERPINE1,SERPINF1,TTR	120 (20)
lisofylline	chemical drug	2,49E-02	LAMB1
berberine	chemical drug	9,96E-03	FN1,MMP2,TIMP1,VIM	122 (17)
topotecan	chemical drug	9,03E-04	AFP,C3,C4A/C4B,ENO1,HSPA8,PNP,VCL
bromocriptine	chemical drug	4,21E-03	ANXA5,GNAS,MMP2
(6S)-hydroxyhyoscyamine	chemical drug	2,49E-02	HSPA5
morphine	chemical drug	2,63E-02	GNAS,SPARC,THBS1,TXN
camptothecin	chemical drug	1,68E-04	ALDOA,ANXA2,CASP14,GAPDH,GPI,IGFBP3,LGALS7/LGALS7B,PPIA,PTX3,RCN1,SERPINE1,TAGLN2,TGFBI,TGM3,TPM1	96 (7)
pentoxifylline	chemical drug	3,35E-03	COL1A1,POSTN,TIMP1	98 (19)
caffeine	chemical drug	1,65E-02	CAT,THBS1,VIM
tiotropium	chemical drug	3,30E-02	MMP2
ciprofibrate	chemical drug	1,46E-03	ANXA2,APOB,CAT,COL4A2,LGALS3BP,TAGLN2
bezafibrate	chemical drug	8,65E-03	APEX1,CAT,HSPA5,SERPINE1
fenofibrate	chemical drug	1,04E-03	APEX1,APOB,CAT,GAPDH,GOT2,LDHB,PSMA4,SERPINE1	27 (3)
curcumin	chemical drug	2,60E-02	COL1A1,COL1A2,HSP90B1,HSPA8,MMP2,SERPINE1,VIM
tetrathiomolybdate	chemical drug	1,20E-04	COL1A1,SERPINE1,TIMP1
thioctic acid	chemical drug	1,10E-02	CAT,MMP2,TIMP2
AGN194204	chemical drug	2,54E-03	ANXA2,CST3,GAPDH,GNAS,LMNA,TIMP1
valproic acid	chemical drug	5,97E-09	CALR,CAT,CTSB,HSPA5,NME1,PSMA2,PSMA3,PSMA4,PSMA5,PSMA6,PSMA7,PSMB1,PSMB2,PSMB4,PSMB5,PSMB6,PTX3,SERPINE1,THBS1	59 (7)
mycophenolic acid	chemical drug	7,29E-06	AZGP1,FN1,HSPA5,KRT17,KRT19,KRT6B,SERPINE1	53 (12)
latanoprost	chemical drug	2,49E-02	MMP2
5-azacytidine	chemical drug	2,42E-07	ANXA2,CALR,COL1A1,HSP90B1,HSPA5,HSPA8,KRT17,LDHB,SERPINB8,THBS1
decitabine	chemical drug	3,45E-09	ANXA2,B2M,CHI3L1,COL1A1,COL1A2,COL3A1,COL6A3,FN1,IGFBP3,IGFBP7,JUP,KRT16,LUM,MMP2,NME1,SPARC,TGFBI,THBS1,TIMP2,VIM	126 (21)
valsartan	chemical drug	9,57E-07	COL1A1,FN1,MMP2,POSTN,SERPINE1,TIMP1	86 (19)
iodixanol	chemical drug	3,30E-02	SERPINE1
N-nitro-L-arginine methyl ester	chemical drug	8,53E-05	BGN,COL1A2,COL3A1,FN1,SERPINE1,TIMP1	116 (21)
zofenopril	chemical drug	4,91E-02	TIMP1
N-acetyl-L-cysteine	chemical drug	6,22E-03	C3,COL1A1,HSPA5,MMP2,PRDX2,SERPINE1	115 (22)
eflornithine	chemical drug	2,01E-05	APOB,C3,FN1,LGALS3BP,SERPINE1	61 (7)
penicillamine	chemical drug	4,91E-02	HSPA5
lipopolysaccharide	chemical drug	1,09E-32	ACTN4,ALB,ANXA1,ANXA5,APEX1,APOB,ARG1,AZGP1,BGN,C3,CALM1 (includes others),CALR,CHI3L1,COL12A1,COL1A1,COL1A2,COL3A1,COL4A2,COL5A1,COL6A1,CST3,CTSB,CYCS,ENO1,FN1,GDI2,HSP90B1,HSPA5,HSPA8,IGFBP3,IGHG1,IGKC,ITIH2,KRT13,KRT4,LAMB1,LGALS3BP,LTF,LYZ,MDH1,MMP2,MSN,NID2,P4HB,PCOLCE,PDIA3,PDIA4,PPIA,PRDX1,PSMA2,PSMA6,PSMB4,PTX3,S100A8,S100A9,SERPINC1,SERPINE1,SERPINE2,SERPINF1,SPARC,TALDO1,THBS1,TIMP1,TIM…	126 (19)
hydroxypropyl-beta-cyclodextrin	chemical drug	1,08E-02	CTSB,CTSD
2-deoxyglucose	chemical drug	1,27E-02	HSP90B1,HSPA5,PDIA3
phorbol myristate acetate	chemical drug	7,30E-07	ALB,ANXA1,ARG1,C3,CSTA,CTSD,DCD,DSG1,HSPA5,IGFBP3,IGFBP6,KRT10,LYZ,MMP2,PNP,PRDX1,S100A8,S100A9,SERPINB12,SERPINE1,SPARC,THBS1,TIMP1,VCL,VIM	121 (21)
methylprednisolone	chemical drug	4,74E-09	A2M,ANXA1,ANXA2,APEX1,ARG1,B2M,CST3,CYCS,DSG1,FN1,FSTL1,HSP90B1,JUP,KRT10,KRT19,NME1,PGAM1,PSAT1,SERPINE1,SPARC,VIM
ouabain	chemical drug	9,57E-07	ANXA5,HSPA5,HSPA8,VIM,YWHAG,YWHAQ	83 (7)
estrogen	chemical drug	1,51E-09	ALB,APOB,COL1A1,COL3A1,COL4A2,COL5A1,COL6A2,CTSD,FN1,IGFBP6,LTF,NME1,PSMA2,PTX3,SERPINE2,SPARC	129 (17)
tibolone	chemical drug	1,67E-02	SERPINE1
spironolactone	chemical drug	4,71E-04	COL1A1,COL1A2,COL3A1,FN1,TIMP2	97 (19)
mifepristone	chemical drug	5,20E-06	ANXA1,ARG1,C3,CHI3L1,CTSD,HSPA5,IGFBP3,KRT6B,LTF,POSTN,SERPINE1,SERPING1	130 (21)
eplerenone	chemical drug	1,98E-03	FN1,MMP2,SERPINE1	85 (15)
mibolerone	chemical drug	2,94E-14	C4A/C4B,CALR,CALU,CLEC11A,COL1A1,COL1A2,COL6A3,GOT2,HSP90B1,HSPA5,IGFBP3,NME1,P4HB,PPIA,PPIB,TGFBI
cannabidiol	chemical drug	1,32E-02	FN1,VIM
S-equol	chemical drug	2,99E-03	MMP2,SERPINE1	79 (7)
rubitecan	chemical drug	3,30E-02	PEBP1
tetraethylammonium	chemical drug	8,19E-07	HSPA8,PDIA3,PSMA6,PSMB4,RPLP0,TPI1
zinc	chemical drug	3,15E-02	CAT,COL1A1,ENO1
benzyloxycarbonyl-Leu-Leu-Leu aldehyde	chemical - protease inhibitor	3,09E-09	CAT,CFL1,CTSB,HBB,HSP90B1,HSPA5,HSPA8,MMP2,PEBP1,PFN1,PPIA,PSMA3,PSMB2,RPLP0,TIMP1,TXN	134 (16)
epoxomicin	chemical - protease inhibitor	3,75E-08	HSPA5,PSMA2,PSMA6,PSMB1,PSMB4,PSMB5
4-hydroxymercuribenzoate	chemical - protease inhibitor	8,36E-03	COL1A1
lactacystin	chemical - protease inhibitor	8,23E-08	APOB,CFL1,CTSD,HBB,HSP90B1,HSPA5,MMP2,PEBP1,PFN1,PPIA,RPLP0,TXN	112 (10)
lysophosphatidylcholine	chemical - other	4,41E-02	CAT,SERPINE1
cardiotoxin	chemical - other	6,09E-08	B2M,BGN,COL1A2,COL6A2,GM2A,HSPA5,IGFBP7,MMP2,PGAM1,RPSA,TIMP1
proanthocyanidin derivative	chemical - other	3,30E-02	MFGE8
phorbol esters	chemical - other	6,65E-03	ANXA1,B2M,TIMP1,TXN	79 (7)
PP2/AG1879 tyrosine kinase inhibitor	chemical - kinase inhibitor	3,29E-03	AFP,FN1,SERPINE1,VIM	94 (17)
IND S1	chemical - kinase inhibitor	2,11E-08	CFL1,ENO1,PDIA3,PGAM1,PRDX1,PRDX2
IND S7	chemical - kinase inhibitor	1,02E-07	CALU,ENO1,PDIA3,PGAM1,PRDX2,VIM
MEL T1	chemical - kinase inhibitor	7,97E-06	CFL1,ENO1,PGAM1,PRDX1
MEL S3	chemical - kinase inhibitor	3,91E-06	CALU,ENO1,PGAM1,PRDX2,VIM
herbimycin	chemical - kinase inhibitor	6,31E-03	ARG1,MMP2,SERPINE1	103 (19)
Bay 11-7082	chemical - kinase inhibitor	1,10E-02	CHI3L1,HSPA5,MMP2
LY294002	chemical - kinase inhibitor	7,24E-05	COL1A1,COL1A2,CST3,FN1,HSPA5,IGFBP3,JUP,LMNA,MMP2,POSTN,PRDX1,SERPINE1,THBS1,VIM	117 (19)
PD98059	chemical - kinase inhibitor	9,20E-14	ALDOA,ANXA1,BGN,C3,COL1A1,COL1A2,COL3A1,CTSB,CYCS,DSG1,ENO1,FN1,GPI,HSPA5,IGFBP3,KRT19,LDHA,MMP2,PNP,POSTN,S100A8,SERPINE1,THBS1,TIMP1,TIMP2,TXN,VIM	122 (24)
JAK inhibitor I	chemical - kinase inhibitor	1,70E-02	C3,TIMP1
Sb202190	chemical - kinase inhibitor	8,81E-06	COL1A1,FN1,HSPA5,MMP2,PRDX1,S100A8,SERPINE1,TIMP2	88 (20)
calphostin C	chemical - kinase inhibitor	1,44E-05	FN1,HSP90B1,HSPA5,P4HB,PDIA4,S100A8	70 (7)
SB203580	chemical - kinase inhibitor	1,95E-15	ANXA1,ARG1,C3,C4A/C4B,COL1A1,COL1A2,COL3A1,ENO1,FN1,GDI2,GPI,IGFBP3,MMP2,POSTN,PRDX1,PSMB4,RCN3,SERPINE1,SERPING1,SPARC,TAGLN,THBS1,TIMP1,TIMP2	115 (23)
H89	chemical - kinase inhibitor	2,21E-02	MMP2,S100A8,SERPINE1,TXN
U0126	chemical - kinase inhibitor	2,05E-04	C3,COL1A1,COL2A1,FN1,HSPA5,MMP2,POSTN,S100A9,SERPINE1,THBS1,TIMP2,TPM1,VIM	118 (20)
SP600125	chemical - kinase inhibitor	3,31E-04	COL1A1,FN1,POSTN,PRDX1,PTX3,SERPINE1,THBS1,TPM1	113 (19)
H-7	chemical - kinase inhibitor	3,42E-04	COL1A1,COL1A2,FN1,SERPINE1	138 (23)
(Ala9)-autocamtide-2	chemical - kinase inhibitor	2,49E-02	MMP2
bisindolylmaleimide I	chemical - kinase inhibitor	1,47E-03	FN1,HSPA5,KRT10,MMP2,SERPINE1	90 (19)
Ro31-8220	chemical - kinase inhibitor	2,88E-05	COL1A1,COL1A2,FN1,MMP2,SERPINE1	129 (19)
bisindolylmaleimide	chemical - kinase inhibitor	1,98E-02	FN1,PRDX1
staurosporine	chemical - kinase inhibitor	3,46E-04	ANXA5,COL1A1,COL1A2,KRT14,PRDX1,SERPINE1	107 (19)
tyrphostin 25	chemical - kinase inhibitor	4,11E-02	COL1A1
N-chlorotaurine	chemical - kinase inhibitor	4,66E-05	CAT,PRDX1,TXN
wortmannin	chemical - kinase inhibitor	6,98E-09	COL1A1,COL1A2,COL3A1,DSG1,FN1,MMP2,MSN,NT5E,POSTN,SERPINE1,TPI1,TPM1,VIM	102 (24)
15-deoxy-delta-12,14 -PGJ 2	chemical - endogenous non-mammalian	7,67E-04	COL1A1,COL1A2,CTSB,CTSD,FN1,PRDX1,SERPINE1	109 (16)
prostaglandin J2	chemical - endogenous non-mammalian	1,95E-07	PSMA2,PSMA3,PSMA5,PSMA6,PSMB2,PSMB4
8-epi-prostaglandin F2alpha	chemical - endogenous non-mammalian	4,11E-02	MMP2
E. coli B5 lipopolysaccharide	chemical - endogenous non-mammalian	1,32E-03	AHSG,B2M,CAT,PPIA,PSMA5,SERPINE1,THBS1,TTR	71 (7)
E. coli lipopolysaccharide	chemical - endogenous non-mammalian	2,28E-03	HSP90B1,HSPA5,S100A8,S100A9	11 (3)
puromycin	chemical - endogenous non-mammalian	1,20E-02	HSPA5,SERPINE1
teichoic acid	chemical - endogenous non-mammalian	4,91E-02	MMP2
maslinic acid	chemical - endogenous non-mammalian	6,53E-05	ACTN1,CFL1,MSN,THBS1,YWHAE,YWHAG
thymoquinone	chemical - endogenous non-mammalian	5,92E-03	CAT,COL1A1,COL3A1	116 (14)
peoniflorin	chemical - endogenous non-mammalian	1,20E-02	ENO1,PDIA3
E. coli serotype 0127B8 lipopolysaccharide	chemical - endogenous non-mammalian	1,98E-02	ANXA1,HSPA5,LAMC1,PTX3,SEMA7A
betulin	chemical - endogenous non-mammalian	4,13E-04	TIMP1,TIMP2	35 (7)
baicalin	chemical - endogenous non-mammalian	7,12E-03	COL1A1,SPARC,TAGLN
cercosporin	chemical - endogenous non-mammalian	2,49E-02	FN1
formylmethylflavin	chemical - endogenous non-mammalian	1,02E-03	MMP2,TIMP1	43 (5)
antimycin A	chemical - endogenous non-mammalian	6,80E-03	TIMP1,TIMP2	43 (5)
2-mercaptoacetate	chemical - endogenous non-mammalian	6,85E-04	ANXA2,ENO1,MFGE8
benzyl isothiocyanate	chemical - endogenous non-mammalian	9,74E-03	MMP2,SERPINE1	75 (16)
filipin	chemical - endogenous non-mammalian	2,49E-02	SERPINE1
ferulic acid	chemical - endogenous non-mammalian	2,28E-02	CAT,TIMP1
monorden	chemical - endogenous non-mammalian	6,80E-03	HSP90B1,HSPA5	3 (2)
esculetin	chemical - endogenous non-mammalian	1,02E-03	ALB,COL1A1
geldanamycin	chemical - endogenous non-mammalian	3,30E-02	BGN,COL6A2,HSPA5,QSOX1
anisomycin	chemical - endogenous non-mammalian	8,45E-03	HSPA5,POSTN,SERPINE1	97 (18)
anethole	chemical - endogenous non-mammalian	1,42E-03	MMP2,TIMP1	59 (7)
bergamottin	chemical - endogenous non-mammalian	4,91E-02	MMP2
zymosan	chemical - endogenous non-mammalian	1,15E-02	CAT,CST3,MMP2
isoliquiritigenin	chemical - endogenous non-mammalian	8,71E-03	MMP2,SERPINF1
magnolol	chemical - endogenous non-mammalian	8,71E-03	CLEC11A,MMP2	49 (7)
hemozoin	chemical - endogenous non-mammalian	2,13E-02	S100A8,S100A9
jasplakinolide	chemical - endogenous non-mammalian	4,91E-02	TAGLN
lumichrome	chemical - endogenous non-mammalian	1,02E-03	MMP2,TIMP1	43 (5)
phytol	chemical - endogenous non-mammalian	3,30E-02	CAT
baicalein	chemical - endogenous non-mammalian	5,92E-03	MMP2,TIMP1,TIMP2	102 (18)
ampelopsin	chemical - endogenous non-mammalian	2,49E-02	HSPA5
sanguinarine	chemical - endogenous non-mammalian	1,42E-03	TIMP1,TIMP2	59 (7)
tunicamycin	chemical - endogenous non-mammalian	1,61E-03	CALR,COL1A1,COL2A1,HSP90B1,HSPA5,VIM	75 (13)
E64	chemical - endogenous non-mammalian	1,67E-02	MMP2
2-aminoisobutyric acid	chemical - endogenous non-mammalian	8,36E-03	ALB
ecdysterone	chemical - endogenous non-mammalian	3,30E-02	COL1A1
platelet activating factor	chemical - endogenous mammalian	2,89E-06	FN1,MMP2,SERPINE1,THBS1,TIMP1,TIMP2	99 (21)
13(S)-hydroxyoctadecadienoic acid	chemical - endogenous mammalian	3,30E-02	SERPINE1
9-hydroxy-(S)-10,12-octadecadienoic acid	chemical - endogenous mammalian	8,36E-03	SERPINE1
dinoprost	chemical - endogenous mammalian	4,25E-05	PDIA4,PTX3,THBS1,YWHAE,YWHAG,YWHAZ
lipoxin A4	chemical - endogenous mammalian	1,80E-04	FN1,SERPINE1,TIMP1,TIMP2	98 (20)
cyclic AMP	chemical - endogenous mammalian	1,45E-03	ARG1,CYCS,FN1,IGFBP3,LGALS3BP,SERPINE1,TIMP1,YWHAG	103 (18)
cyclic GMP	chemical - endogenous mammalian	6,80E-03	SERPINE1,VCL
5'-methylthioadenosine	chemical - endogenous mammalian	4,34E-03	COL1A1,COL1A2
adenosine	chemical - endogenous mammalian	9,37E-04	GNAS,HSPA5,SERPINE1,TIMP1	93 (20)
inosine	chemical - endogenous mammalian	1,25E-11	A2M,ANXA1,ANXA2,ANXA5,C3,C4A/C4B,LGALS3BP,SERPING1,TIMP1,VIM
xanthine	chemical - endogenous mammalian	5,92E-03	MMP2,TIMP2	17 (3)
L-phenylalanine	chemical - endogenous mammalian	1,88E-03	ALB,TTR
L-arginine	chemical - endogenous mammalian	1,62E-03	BGN,FN1,SERPINE1	113 (22)
L-isoleucine	chemical - endogenous mammalian	1,67E-02	ALB
L-leucine	chemical - endogenous mammalian	1,67E-02	ALB
hyaluronic acid	chemical - endogenous mammalian	3,10E-05	COL2A1,COL6A2,FN1,MMP2,SERPINE1,TIMP1,TIMP2	96 (22)
heparin	chemical - endogenous mammalian	1,73E-05	APOB,COL1A1,FN1,IGFBP3,MMP2,VIM	95 (18)
mannitol	chemical - endogenous mammalian	8,71E-03	COL1A1,FN1	22 (4)
2-methoxyestradiol	chemical - endogenous mammalian	5,20E-03	LTF,SERPINE2,YWHAB
beta-estradiol	chemical - endogenous mammalian	2,78E-29	A2M,AFP,ALB,ALDOA,ANXA1,APEX1,APOD,ARG1,C3,C4A/C4B,CALM1 (includes others),CALR,CHI3L1,COL1A1,COL1A2,COL3A1,COMP,CTSB,CTSD,DSP,ENO1,FN1,FSTL1,GDI2,GM2A,HBB,HSP90B1,HSPA5,HSPA8,IGFBP3,IGFBP6,KRT13,KRT16,KRT17,KRT19,KRT4,KRT5,KRT6A,KRT6B,LAMB1,LDHA,LMNA,LTF,LUM,LYZ,MMP2,NME1,PDIA3,PDIA4,PNP,PPIB,PSAT1,PSMA2,PSMB1,PSMB2,PTX3,QSOX1,SERPINA5,SPARC,THBS1,TIMP1,TIMP2,TPI1,TPM1,TTR,TXN,VIM,YWHAE,YWHAZ	138 (21)
4-hydroxyestradiol-17beta	chemical - endogenous mammalian	9,04E-05	CAT,HSPA5,LTF
ursodeoxycholic acid	chemical - endogenous mammalian	1,70E-03	COL1A1,COL1A2,SPARC,TIMP1
hydrogen peroxide	chemical - endogenous mammalian	4,77E-15	ANXA2,APEX1,CAT,COL1A1,COL1A2,CST3,CTSB,CTSD,CYCS,DCD,FN1,HSPA5,LCN1,MMP2,PDIA3,PDIA4,PRDX1,PRDX2,PRKCSH,PTX3,RCN1,SERPINE1,SPARC,TAGLN,TXN,VIM	124 (19)
linoleic acid	chemical - endogenous mammalian	1,84E-04	APOB,HSP90B1,HSPA5,S100A8,S100A9	82 (10)
prostaglandin E2	chemical - endogenous mammalian	3,29E-05	ANXA2,CASP14,COL1A1,FN1,IGFBP7,IGHG1,LMNA,MMP2,NT5E,S100A8,THBS1	124 (20)
UTP	chemical - endogenous mammalian	1,30E-03	FLNA,SERPINE1,THBS1	90 (14)
chondroitin sulfate	chemical - endogenous mammalian	4,11E-02	FN1
1-O-hexadecyl-2-N-methylcarbamol-sn-glycerol-3-phosphocholine	chemical - endogenous mammalian	3,30E-02	MMP2
ATP	chemical - endogenous mammalian	1,54E-03	ARG1,FLNA,SERPINE1,THBS1,TXN	92 (17)
chondroitin sulfate E	chemical - endogenous mammalian	4,11E-02	CALR
chondroitin sulfate A	chemical - endogenous mammalian	1,55E-04	MMP2,TIMP1,TIMP2	59 (7)
hydrocortisone	chemical - endogenous mammalian	7,67E-04	FN1,IGFBP3,IGFBP6,IGFBP7,S100A8,SERPINE1	104 (17)
cortodoxone	chemical - endogenous mammalian	8,36E-03	FN1
fingolimod phosphate	chemical - endogenous mammalian	1,42E-03	SERPINE1,THBS1
indican	chemical - endogenous mammalian	2,28E-02	ALB,THBS1
2,3-bis(3'-hydroxybenzyl)butane-1,4-diol	chemical - endogenous mammalian	4,11E-02	SPARC
valine	chemical - endogenous mammalian	4,91E-02	ALB
arginine	chemical - endogenous mammalian	2,28E-02	ALB,HSPA5
asparagine	chemical - endogenous mammalian	3,30E-02	ALB
carboxymethylflavin	chemical - endogenous mammalian	1,02E-03	MMP2,TIMP1	43 (5)
superoxide	chemical - endogenous mammalian	7,73E-03	FN1,TIMP1	92 (18)
phenylacetic acid	chemical - endogenous mammalian	2,07E-04	MMP2,TIMP2
methylamine	chemical - endogenous mammalian	3,30E-02	FN1
advanced glycation end-products	chemical - endogenous mammalian	4,13E-04	FN1,PFN1,SERPINE1,SERPINF1
nitric oxide	chemical - endogenous mammalian	3,92E-04	HSPG2,KRT14,MMP2,PDIA4,THBS1,TIMP2,VCL	129 (21)
4-phenylbutyric acid	chemical - endogenous mammalian	2,87E-06	AHSG,CALR,HSP90B1,HSPA5,MMP2,PSMA3,TIMP2	7 (2)
carbon monoxide	chemical - endogenous mammalian	1,33E-02	FN1,PRDX1,SERPINE1
pyridoxal phosphate	chemical - endogenous mammalian	2,49E-02	COL1A1
ethanol	chemical - endogenous mammalian	8,67E-04	CAT,COL1A2,COL3A1,GNAS,HSP90B1,HSPA5,MMP2,SERPINE1,TIMP1,TIMP2	89 (19)
pyridoxamine	chemical - endogenous mammalian	4,91E-02	SERPINE1
thyroid hormone	chemical - endogenous mammalian	4,48E-03	AFP,IGFBP3,SERPINE2,TTR,VIM,YWHAE
(S)-mevalonic acid	chemical - endogenous mammalian	4,91E-02	CAT
sphingosine-1-phosphate	chemical - endogenous mammalian	5,28E-06	ANXA2,FN1,SERPINE1,TAGLN,THBS1,TIMP1,VIM	106 (18)
L-carnitine	chemical - endogenous mammalian	9,74E-03	ALB,CAT
cholecalciferol	chemical - endogenous mammalian	3,25E-02	COL1A1,IGFBP3,SERPINE1
acetaldehyde	chemical - endogenous mammalian	2,54E-05	COL1A1,COL1A2,MMP2,TIMP1	96 (20)
vitamin K1	chemical - endogenous mammalian	8,36E-03	AFP
melatonin	chemical - endogenous mammalian	1,46E-02	CYCS,KRT19,SPARC,VIM
butyric acid	chemical - endogenous mammalian	1,13E-11	A2M,ALB,ANXA1,ANXA2,ANXA5,CALM1 (includes others),COL4A2,COL5A1,COL6A3,CYCS,FSTL1,HBB,HSPG2,IGFBP3,KRT13,NME1,NUCB1,PDIA3,PRDX1,SERPINE1,TGFBI,TIMP1
4-aminophenol	chemical - endogenous mammalian	4,11E-02	VIM
hydrogen sulfide	chemical - endogenous mammalian	7,73E-03	HSPA5,TXN
tretinoin	chemical - endogenous mammalian	1,64E-28	A2M,AFP,ANXA1,ANXA2,ANXA5,ANXA6,APEX1,APOD,ARG1,C3,CALM1 (includes others),CALR,CLEC11A,COL1A1,COL1A2,COL2A1,COL3A1,COL4A2,CTSB,CTSD,DSC1,DSG1,DSP,FN1,GM2A,GNAS,IGFBP3,IGFBP6,IGFBP7,ISLR,KRT1,KRT14,KRT16,KRT19,KRT5,LAMA4,LAMB1,LGALS3BP,LTF,NID2,PFN1,PNP,POSTN,PRDX2,PTX3,S100A8,S100A9,SEMA7A,SERPINB8,SERPINE1,SERPINE2,SERPING1,SPARC,TGFBI,THBS1,TIMP1,TPI1,VCL,VIM,YWHAB,YWHAE,YWHAZ	141 (21)
thiamine	chemical - endogenous mammalian	1,67E-02	TKT
ascorbic acid	chemical - endogenous mammalian	3,98E-03	HSPA5,IGFBP3,SERPINE1,SPARC	112 (17)
spermidine	chemical - endogenous mammalian	5,92E-03	KRT19,MMP2
fatty acid	chemical - endogenous mammalian	7,19E-03	AHSG,HSPA5,S100A8,SERPINE1	70 (7)
goralatide	chemical - endogenous mammalian	4,91E-02	MMP2
riboflavin	chemical - endogenous mammalian	1,08E-02	MMP2,TIMP1
steroid	chemical - endogenous mammalian	4,02E-02	ANXA1,TIMP1
alpha-hydroxyglutarate	chemical - endogenous mammalian	6,84E-04	FN1,VIM
sulfur	chemical - endogenous mammalian	1,67E-02	MMP2
13-hydroxyoctadecadienoic acid	chemical - endogenous mammalian	4,91E-02	CAT
succinylacetone	chemical - endogenous mammalian	3,30E-02	HBB
palmitic acid	chemical - endogenous mammalian	2,10E-03	AHSG,ALDOA,CTSB,GAPDH,HSPA5,SERPINE1	96 (16)
oleic acid	chemical - endogenous mammalian	1,57E-04	APOB,ARG1,GAPDH,HSPA5,IGFBP3,SERPINE1	104 (23)
non-esterified fatty acid	chemical - endogenous mammalian	4,91E-02	APOB
ceramide	chemical - endogenous mammalian	2,13E-02	COL1A1,GAPDH
UDP-D-glucose	chemical - endogenous mammalian	2,31E-10	CALR,HSP90B1,HSPA5,PDIA3,PDIA4
selenomethionine	chemical - endogenous mammalian	3,30E-02	MMP2
GABA	chemical - endogenous mammalian	1,44E-02	FN1,MMP2
S-adenosylhomocysteine	chemical - endogenous mammalian	6,95E-05	COL1A1,COL1A2
S-adenosylmethionine	chemical - endogenous mammalian	3,10E-02	COL1A1,COL1A2
N(6)-carboxymethyl-L-lysine	chemical - endogenous mammalian	1,67E-02	FN1
betaine	chemical - endogenous mammalian	2,41E-03	B2M,HSPA5
3,5-diiodothyronine	chemical - endogenous mammalian	3,64E-03	ENO1,GAPDH
glutamyl-Se-methylselenocysteine	chemical - endogenous mammalian	8,71E-03	PSMA7,TIMP2
selenomethylselenocysteine	chemical - endogenous mammalian	1,44E-02	PSMA7,TIMP2
taurine	chemical - endogenous mammalian	1,98E-03	FN1,MMP2,VIM	124 (21)
L-triiodothyronine	chemical - endogenous mammalian	6,40E-09	A2M,AFP,AHSG,ALB,APOB,C4A/C4B,CST3,IGFBP3,ITIH3,KRT16,KRT17,KRT6A,LMNA,LYZ,NME1,PRDX2,SEMA7A	19 (2)
homocysteine	chemical - endogenous mammalian	4,58E-05	ANXA2,HSPA5,MMP2,PRDX1,PRDX2,TIMP1	101 (18)
D-glucose	chemical - endogenous mammalian	3,98E-15	ALDOA,ANXA1,APOB,C3,CALR,CAT,COL1A1,COL2A1,COL3A1,CTSB,ENO1,FN1,GAPDH,GPI,HSPA5,LAMC1,LDHA,MMP2,PDIA3,PDIA4,PGAM1,PPIB,SERPINE1,TALDO1,THBS1,TIMP1,TKT,TPI1	99 (17)
D-fructose	chemical - endogenous mammalian	5,39E-08	COL1A1,COL3A1,FN1,MMP2,THBS1,TIMP1,TKT	104 (15)
mannose	chemical - endogenous mammalian	2,22E-06	HSP90B1,HSPA5,PDIA3,THBS1
D-galactosamine	chemical - endogenous mammalian	4,86E-03	ALB,CTSB,TIMP1	69 (9)
trehalose	chemical - endogenous mammalian	3,30E-02	VIM
aldosterone	chemical - endogenous mammalian	4,96E-05	COL1A1,COL1A2,COL3A1,FN1,MMP2,SERPINE1,YWHAB	105 (20)
dihydrotestosterone	chemical - endogenous mammalian	1,13E-18	ALDOA,APOD,AZGP1,B2M,C4A/C4B,CHI3L1,COL3A1,COL6A1,ENO1,FN1,GAPDH,GPI,IGFBP3,IGFBP7,KRT1,KRT14,KRT19,KRT5,LDHA,LYZ,MMP2,NID2,NUCB1,PFN1,POSTN,SERPINB6,SERPINE2,SPARC,TALDO1,THBS1,TKT,VIM	130 (16)
cholesterol	chemical - endogenous mammalian	6,54E-07	APOB,COL1A1,COL3A1,FN1,HSP90B1,HSPA5,LYZ,MMP2,S100A8,THBS1,TIMP1	101 (23)
testosterone	chemical - endogenous mammalian	4,49E-06	A2M,ALDOA,ANXA1,CAT,FN1,GDI2,PDIA4,PSMA2,PSMB1,SERPINA5,THBS1,YWHAE,YWHAZ	97 (7)
progesterone	chemical - endogenous mammalian	2,81E-05	APOD,C3,CST3,FN1,HSPA8,IGFBP3,KRT5,LTF,MMP2,POSTN,PTX3,TGFBI,TIMP1,TTR,VIM,YWHAG	113 (20)
Ca2+	chemical - endogenous mammalian	4,09E-09	APEX1,CALR,CASP14,COL1A1,COL2A1,FN1,HSPA5,KRT1,KRT10,PEBP1,S100A8,S100A9,SERPINE1,TAGLN,TIMP2	79 (18)
phosphate	chemical - endogenous mammalian	1,17E-04	A2M,AHSG,COL5A1,LDHA,POSTN,TIMP1
manganese	chemical - endogenous mammalian	1,96E-04	GAPDH,HSP90B1,HSPA5	41 (7)
rituximab	biologic drug	7,73E-03	IGHG1,PEBP1
GnRH analog	biologic drug	2,40E-05	ACTN1,ACTN4,CALR,COL6A1,FN1,GDI2,KRT10,PPIA,PSMA6,PSMB4,TPM1,VCL
defibrotide	biologic drug	2,49E-02	SERPINE1
interferon beta-1a	biologic drug	8,81E-06	ENO1,KRT1,LTF,PGAM1,PPIA,RPL18,S100A9,SERPING1
isotretinoin	biologic drug	2,42E-02	IGFBP3,S100A9,SERPINB3
aldesleukin	biologic drug	4,47E-05	B2M,CALR,IGKC,PDIA3,PSMB6
vancomycin	biologic drug	2,40E-09	A2M,ANXA1,ANXA2,C3,C4A/C4B,CAT,RCN1,S100A11,TIMP1,VIM
leuprolide	biologic drug	1,32E-02	MMP2,TIMP1
desmopressin	biologic drug	2,45E-10	ALB,CTSD,ENO1,FLNA,GAPDH,HSPA8,LDHB,LMNA,PPIA,S100A11,YWHAZ
bacitracin	biologic drug	1,67E-02	ANXA5
elcatonin	biologic drug	3,30E-02	MMP2
ceruletide	biologic drug	1,44E-02	ACTG1,HSPA5
cyclosporin A	biologic drug	1,10E-10	A2M,ANXA1,ANXA2,APOD,BGN,C4A/C4B,COL1A1,COL4A2,FLNA,FN1,HSPA5,KRT16,MMP2,NME1,POSTN,S100A11,S100A9,SERPINE1,TAGLN,TIMP1,VIM	117 (21)
poly rI:rC-RNA	biologic drug	1,93E-04	ANXA1,B2M,C3,FN1,IGFBP6,KRT19,LTF,LYZ,MMP2,PSMA3,SERPING1,THBS1	110 (18)

## Sheet: BM MSC
© 2000-2016 QIAGEN. All rights reserved.
Upstream Regulator	Molecule Type	p-value of overlap	Target molecules in dataset	Mechanistic Network
SLC5A8	transporter	4,32E-02	BAX
ABCB4	transporter	9,64E-04	COL4A1,CTGF,LGALS3
AKAP12	transporter	3,72E-02	ANGPT1
MCL1	transporter	3,72E-02	BAX
APOB	transporter	1,43E-02	PSME2,UBE2D3
NUP98	transporter	3,11E-02	YWHAH
LCN2	transporter	4,28E-04	BAX,CAPG,CDH2,CORO1C
ATP2B2	transporter	3,72E-02	BAX
SLC3A2	transporter	1,88E-02	CTGF
NUP155	transporter	4,92E-02	ACTA1
LDLR	transporter	1,93E-02	G6PD,PSME2,UBE2D3
FOLR1	transporter	2,16E-02	DTD1,SYNCRIP,UBE2V1
ATP9A	transporter	1,25E-02	VEGFC
SEC23B	transporter	6,29E-03	BAX
APOA1	transporter	3,26E-02	CDC42,RAC1
AP2A2	transporter	1,88E-02	BAX
AQP7	transporter	4,92E-02	BAX
RACGAP1	transporter	1,25E-02	CDC42
PLN	transporter	5,30E-03	AK1,GNB2L1,RAB10
IGF1R	transmembrane receptor	8,90E-05	ACTA1,BAX,CDC42,COL4A1,IGFBP5,RAC1,VEGFC	71 (18)
SEMA7A	transmembrane receptor	8,36E-03	BAX,CTGF
SEMA5A	transmembrane receptor	1,25E-02	RAC1
LTBR	transmembrane receptor	3,67E-02	BAX,CXCL12
F3	transmembrane receptor	6,32E-04	ANGPT1,CDC42,CTGF,RAC1
FAS	transmembrane receptor	2,89E-02	BAX,COL4A1,COL8A1,CTGF,LGALS3,PDLIM7
LARP1	translation regulator	2,49E-02	RPS20
EIF5A	translation regulator	3,11E-02	BAX
EIF4E	translation regulator	1,11E-02	CAPG,CAPZB,ILF2,VEGFC
AFF4	transcription regulator	1,38E-03	PTBP1,STC2
WWC1	transcription regulator	1,71E-03	CDH2,CTGF
IRX4	transcription regulator	3,72E-02	ACTA1
SPDEF	transcription regulator	9,07E-03	CDH2,COL4A1,CTGF	42 (5)
STAT3	transcription regulator	3,91E-02	CDH2,CTGF,CXCL12,IGFBP5,STC2,VCAN,WARS
TEAD4	transcription regulator	1,93E-02	ACTA1,CTGF
E2F1	transcription regulator	6,13E-03	ACTR3,BAX,CALD1,DDX39B,HNRNPK,HSPE1,PSMD2,STMN1
SRF	transcription regulator	3,11E-05	ACTA1,CALD1,CNN2,CSRP1,CTGF,DSTN,GLRX3,MYL9,PDLIM7,PGM1
STAT1	transcription regulator	7,22E-03	BAX,KCTD12,PSME1,PSME2,S100A10,WARS
VHL	transcription regulator	1,14E-03	CDH2,CTGF,CXCL12,GBE1,VEGFC	26 (4)
HTATIP2	transcription regulator	6,27E-03	ANGPT1,CDH2
PFDN5	transcription regulator	6,29E-03	BAX
SMAD2	transcription regulator	1,51E-04	CDH2,CTGF,RAC1,TPM3,VEGFC	45 (8)
ZFHX3	transcription regulator	1,71E-02	GSTP1,RPS12,RPS28
MKL1	transcription regulator	3,38E-02	ACTA1,CNN2,MYL9
EPAS1	transcription regulator	2,50E-05	CEMIP,CTGF,EIF5A,GBE1,IGFBP5,MANF,PLOD2,STC2
SOX4	transcription regulator	2,77E-02	BAX,CDH2,PPIC,UCHL1
STAT4	transcription regulator	4,99E-02	GBE1,PLOD2,PRDX6,STC2
SMAD1	transcription regulator	2,62E-02	COL4A1,CTGF
TAF4	transcription regulator	2,53E-03	CTGF,GAS6,PENK,VEGFC
HIF1A	transcription regulator	5,97E-07	ARPC2,CDH2,CEMIP,CTGF,CXCL12,EIF5A,GBE1,IGFBP5,LGALS1,MANF,PLOD2,STC2,VEGFC	49 (6)
MYOCD	transcription regulator	1,32E-02	ACTA1,CALD1,VCAN
SP100	transcription regulator	6,27E-03	CTGF,HSPE1
SMAD7	transcription regulator	1,30E-04	ADAMTS2,CDH2,CTGF,GAS6,RAC1,TPM3	10 (4)
IRF4	transcription regulator	3,17E-04	MANF,MAPRE1,PSMA1,RAB7A,RAC1,YWHAH
FLI1	transcription regulator	4,40E-02	CTGF,GNB2L1
SIM1	transcription regulator	4,52E-02	CFL2,COL11A1,EIF5A,NACA
TEAD3	transcription regulator	4,92E-02	ACTA1
TWIST1	transcription regulator	2,48E-03	BAX,CDH2,CXCL12,IGFBP5,VCAN
NEUROG1	transcription regulator	7,56E-04	CEMIP,CFH,NEO1,PPIC
SALL2	transcription regulator	1,25E-02	BAX
JUN	transcription regulator	4,84E-03	BAX,CTGF,GAS6,GSTP1,LGALS3,PENK,S100A10,STMN1	62 (9)
SREBF1	transcription regulator	2,97E-02	BAX,CAPZB,G6PD,LGALS3
ATN1	transcription regulator	1,80E-07	DPYSL3,IGFBP5,PENK,PPP1CB,PPP2R1A,PSME1,PTBP1,RAB2A,STMN1
MED1	transcription regulator	1,37E-02	BAX,EDF1,GSTP1,STC2
ETV5	transcription regulator	2,50E-03	BAX,CDH2,CXCL12
CDKN2A	transcription regulator	6,73E-03	AK1,BAX,CAPG,CPA4,CTGF,IGFBP5	12 (3)
HEXIM1	transcription regulator	1,07E-02	ANGPT1,PTBP1
KLF2	transcription regulator	1,25E-02	CDH2,COL4A1,CTGF,PLOD2
SUB1	transcription regulator	2,49E-02	BAX
SUPT16H	transcription regulator	1,07E-02	ACTA1,HNRNPK
FOXM1	transcription regulator	4,25E-03	CDH2,CXCL12,STMN1,VCAN	42 (4)
SKIL	transcription regulator	3,00E-02	COL4A1,CXCL12
MYBL2	transcription regulator	2,75E-02	IGFBP5,IQGAP1
PML	transcription regulator	7,24E-03	AKR1A1,BAX,RSU1,STMN1
TP73	transcription regulator	4,43E-03	BAX,CNN3,G6PD,IGFBP5,STMN1,UBE2V1,VEGFC	44 (4)
MECP2	transcription regulator	2,80E-02	CAPG,GSTO1,GSTP1
NFE2L2	transcription regulator	1,36E-06	AKR1A1,CBR1,CTGF,DDX39B,DSTN,EIF2S1,ERP29,G6PD,GBE1,GNB2L1,GSTO1,GSTP1,PSMA1
HNF4A	transcription regulator	1,31E-04	ACTR3,ARPC5,CAPZA2,CFL2,CTSA,DDX39B,G6PD,GBE1,GSTO1,HSPE1,ISOC1,LGALS3,PGM1,PGM3,PSMA1,RAB10,RAB2A,RAB7A,RPS20,RSU1,SNRPD2,SNX3,UBE2D3,UBE2V1,UCHL1,VEGFC,VTN
SMAD4	transcription regulator	3,88E-04	ANGPT1,CAB39,CDH2,COL7A1,CTGF,RAC1,TPM3	36 (8)
BRCA2	transcription regulator	3,11E-02	BAX
NACC1	transcription regulator	4,32E-02	BAX
SMARCA2	transcription regulator	3,81E-02	ACTA1,COL11A1
ATF4	transcription regulator	1,22E-03	IGFBP5,LGALS3,PENK,STC2,WARS
MEOX2	transcription regulator	2,50E-02	ANGPT1,VEGFC
TSG101	transcription regulator	4,92E-02	STMN1
ERG	transcription regulator	7,75E-03	DSTN,FLNB,RAB2A,RAB7A,RSU1
SMAD3	transcription regulator	2,61E-03	CDH2,COL7A1,CTGF,RAC1,TPM3,VEGFC	51 (9)
DDIT3	transcription regulator	4,55E-02	HSPE1,WARS
ARNT2	transcription regulator	4,14E-02	CFL2,COL11A1,EIF5A,NACA
ETS1	transcription regulator	4,20E-02	ARPC2,BAX,CTGF,HSPE1
YAP1	transcription regulator	8,71E-03	BAX,CTGF,MYL9
PSMD10	transcription regulator	1,16E-02	ANGPT1,BAX
FOXC2	transcription regulator	3,67E-02	BAX,CDH2
MYB	transcription regulator	2,23E-03	BAX,CXCL12,IGFBP5,IQGAP1	18 (5)
SNAI2	transcription regulator	2,50E-03	CDC42,CXCL12,UBE2D3
SOX15	transcription regulator	3,72E-02	CTGF
TRIM24	transcription regulator	2,34E-02	CSRP1,EIF5A,LGALS3
HTT	transcription regulator	1,59E-03	ACTA1,ADAMTS2,CBR1,COL4A1,HSPE1,IGFBP5,PENK,PSME1,PTBP1,RAB10,STMN1,UCHL1	58 (6)
MYCN	transcription regulator	2,33E-13	BAX,CDC42,COL4A1,COL8A1,CTGF,DPYSL3,EIF5A,LGALS1,NACA,P3H1,RPL11,RPS12,RPS20,RPS28,S100A10,UBE2V2,UCHL1
YY1	transcription regulator	1,03E-03	ACTA1,BTF3,CAPG,CXCL12,IGFBP5,SYNCRIP,VEGFC
PRDM1	transcription regulator	4,92E-02	CFH,CPA4,GBE1,LGALS1
RUNX2	transcription regulator	6,10E-04	BAX,CDH2,COL11A1,DPYSL3,LGALS3
HNRNPK	transcription regulator	1,43E-02	CTGF,G6PD
FOS	transcription regulator	1,97E-03	ARPC5,CTGF,GSTP1,IGFBP5,LGALS3,PENK,S100A10,SNX3,STMN1,TBCA	38 (3)
PAX3	transcription regulator	2,48E-04	CTSA,EIF2S1,FKBP1A,G6PD,HARS,PSME1,VCAN
SNAI1	transcription regulator	3,26E-05	ACTR3,CDC42,CDH2,CFL2,FLNB,TPM3
STAT5A	transcription regulator	3,19E-02	BAX,CEMIP,CPA4,TPM3,WARS
POU2AF1	transcription regulator	3,96E-02	LGALS1,S100A10
VAV2	transcription regulator	9,91E-03	CDC42,RAC1
FUBP1	transcription regulator	3,72E-02	STMN1
SMARCA4	transcription regulator	1,06E-03	ACTA1,COL7A1,COTL1,CTGF,FLNB,GSTO1,GSTP1,IGFBP5,LGALS1,LGALS3,TWF1
EPC1	transcription regulator	2,49E-02	ACTA1
MTPN	transcription regulator	1,80E-03	BAX,COL8A1,GAS6,S100A10
CTNNB1	transcription regulator	2,22E-05	ACTR3,BTF3,CAPZB,CDH2,CNN2,COL4A1,CTGF,CTHRC1,CXCL12,EDIL3,EIF5A,HSPE1,IGFBP5,LGALS3,VCAN	45 (6)
FOXN3	transcription regulator	4,32E-02	CDH2
CUX1	transcription regulator	4,40E-02	CDH2,MARCKS
HMGB2	transcription regulator	3,72E-02	BAX
TP53	transcription regulator	2,55E-11	AK1,ANGPT1,BAX,CLIC4,CNN2,CNN3,COL4A1,CSRP1,CTGF,CXCL12,DSTN,EDIL3,FKBP1A,G6PD,GAS6,GSTP1,IGFBP5,LGALS3,MYL9,NEO1,PAFAH1B2,PARK7,PDLIM5,PGM3,PLOD2,PPIC,PRDX6,PSMA1,PSMD2,RBM3,STMN1,VCAN,YWHAH	67 (16)
WT1	transcription regulator	3,33E-03	CLIC4,CMPK1,COL4A1,CTGF,LGALS3,WARS
JMY	transcription regulator	1,25E-02	BAX
MYC	transcription regulator	2,07E-08	ACTA1,ANGPT1,BAX,CAPZB,CDH2,CLIC4,COL4A1,COL8A1,DDX39B,EIF2S1,G6PD,HNRNPAB,HSPE1,LGALS1,MYL9,PDLIM7,PTBP1,RAB10,RPS12,RPS20,S100A10,SNRPD2,STMN1,VEGFC
DEK	transcription regulator	4,92E-02	PRDX6
MEF2D	transcription regulator	1,52E-02	ACTA1,CTGF
PTPN23	phosphatase	1,88E-02	CDH2
PTEN	phosphatase	6,55E-03	ANGPT1,BAX,CNN3,CSRP1,IGFBP5,LGALS3,PGM1,VEGFC	68 (16)
PPP1R13B	phosphatase	1,88E-02	BAX
IGBP1	phosphatase	2,49E-02	RAC1
PPP1CA	phosphatase	8,09E-04	CDH2,CTGF
PPP1CC	phosphatase	1,88E-02	BAX
PAPPA	peptidase	3,11E-02	IGFBP5
PSMA1	peptidase	6,29E-03	GSTP1
CAST	peptidase	6,94E-03	ACTA1,CDH2
LONP1	peptidase	3,96E-02	HSPE1,TPM3
PSEN1	peptidase	1,69E-08	ACTA1,ARF4,BAX,CDH2,CFL2,DSTN,FKBP1A,GSTP1,HSPE1,PAFAH1B2,PRDX6,STMN1,TPM3,UCHL1,WARS	56 (7)
USP11	peptidase	2,49E-02	BAX
MMP2	peptidase	2,15E-02	CXCL12,PPP2R1A
MMP3	peptidase	2,87E-02	RAC1,RBM8A,SYNCRIP
F2	peptidase	5,99E-07	ANGPT1,BAX,CALD1,COL4A1,CORO1C,COTL1,CTGF,ERP29,IGFBP5,RAC1,VTN	62 (16)
ATXN3	peptidase	4,92E-02	CXCL12
PLG	peptidase	6,21E-06	BAX,CLIC4,CNN2,COLEC12,RAB7A,RAC1
PSMB5	peptidase	1,88E-02	GSTP1
ADAMTS5	peptidase	1,25E-02	VCAN
CAPN2	peptidase	4,32E-02	PPP2R1A
UCHL3	peptidase	2,49E-02	BAX
AMOT	other	1,25E-02	CTGF
Atg5	other	3,11E-02	BAX
SLIT3	other	1,25E-02	CDC42
ESRP1	other	1,88E-02	RAC1
ZNF346	other	1,88E-02	BAX
PDLIM2	other	2,74E-03	CEMIP,KCTD12,MYL9,STC2
SAV1	other	4,32E-02	CTGF
TTC5	other	1,88E-02	BAX
OLFM2	other	2,49E-02	ACTA1
RASSF6	other	3,11E-02	BAX
SH2D5	other	6,29E-03	RAC1
Meg3	other	2,49E-02	IQGAP1
PREX1	other	6,29E-03	RAC1
MAGEA2/MAGEA2B	other	1,25E-02	BAX
RASSF3	other	3,72E-02	BAX
PCDH9	other	1,25E-02	BAX
AMER1	other	3,72E-02	BAX
TEX11	other	2,49E-02	BAX
RICTOR	other	1,41E-03	BAX,PSMA1,PSMD2,PSME1,PSME2,RPL11,RPS21	10 (2)
MARCKSL1	other	4,32E-02	ACTA1
MED28	other	4,32E-02	CNN2
LRRC4	other	6,29E-03	STMN1
KIAA1524	other	7,04E-03	COL8A1,PDLIM7,PRG4
VTRNA2-1	other	6,29E-03	BAX
CDH3	other	2,49E-02	CDH2
ZMAT3	other	1,25E-02	BAX
Ins1	other	4,87E-02	ERP29,G6PD,GSTP1,HNRNPK,IGFBP5
ITGB5	other	3,72E-02	VTN
DOCK1	other	6,29E-03	RAC1
YWHAG	other	3,40E-03	BAX,PRDX6
MIA	other	4,92E-02	CDH2
APLN	other	3,13E-02	BAX,CTGF
CTNNBIP1	other	4,32E-02	RAC1
SERPINA3	other	4,32E-02	CTGF
CRK	other	3,11E-02	RAC1
EZR	other	6,94E-03	BAX,CDH2	17 (5)
ZBTB46	other	3,11E-02	VEGFC
NPPB	other	1,52E-02	BAX,CTGF
KRT19	other	5,80E-04	EIF2S1,ERP29
MAPT	other	7,44E-10	ACTA1,ARF4,CFL2,DPYSL3,DSTN,FKBP1A,GSTP1,HSPE1,PAFAH1B2,PENK,PRDX6,STMN1,TPM3,UCHL1	55 (6)
RASSF1	other	1,50E-02	CDH2,COL4A1,MYL9
LGALS1	other	3,67E-02	LGALS1,LGALS3
EIF3E	other	3,72E-02	ANGPT1
RGS5	other	6,29E-03	BAX
MDM4	other	4,32E-02	BAX
ADCYAP1	other	1,67E-02	ANGPT1,CNN3,EDIL3,PRDX6,S100A10
ANXA2	other	1,52E-02	BAX,S100A10
TIAM1	other	2,49E-02	RAC1
ITGA9	other	3,72E-02	CDH2
DLC1	other	4,32E-02	S100A10
APP	other	1,22E-10	ACTA1,AK1,ARF4,BAX,CDC42,CDH2,CFL2,CTGF,CXCL12,DSTN,FKBP1A,GSTP1,HARS,HSPE1,IGFBP5,LGALS3,PAFAH1B2,PENK,PPP2R1A,PRDX6,PSME1,STMN1,TPM3,UCHL1,VCAN	67 (14)
CR1L	other	1,06E-03	COL4A1,COL8A1,CTGF
TPM1	other	1,88E-02	CALD1
LINC00853	other	6,29E-03	CMPK1
MSLN	other	3,72E-02	BAX
SRSF1	other	1,24E-02	PTBP1,RAC1
SSPN	other	3,72E-02	CDH2
CASQ2	other	4,32E-02	ACTA1
SERPINF1	other	5,04E-03	BAX,CTGF,LOXL1
COL4A3	other	9,91E-03	COL4A1,CTGF
CKAP4	other	6,29E-03	CTGF
HPS1	other	1,25E-02	LGALS3
ARHGEF25	other	3,88E-04	CDC42,RAC1
MFGE8	other	8,09E-04	CDH2,EDIL3
PLIN3	other	1,25E-02	BAX
ATXN7	other	3,40E-03	IGFBP5,PENK
BCAN	other	1,25E-02	CDH2
IQGAP2	other	2,49E-02	IQGAP1
DCX	other	3,11E-02	ACTR3
NDRG2	other	4,92E-02	BAX
S100A4	other	1,83E-02	BAX,CLIC4
VGLL4	other	6,29E-03	ACTA1
PTH	other	4,23E-04	ANGPT1,CTGF,CXCL12,GNG12,IGFBP5,SNX3	37 (12)
SNCA	other	1,41E-02	BAX,UCHL1,YWHAH
CEACAM1	other	1,24E-02	ANGPT1,VEGFC
CANX	other	1,88E-02	BAX
HNRNPA2B1	other	1,25E-02	CEMIP,KCTD12,PLOD2,VCAN
FARP2	other	6,29E-03	CDC42
PSIP1	other	8,09E-04	PRDX6,VEGFC
TP53INP1	other	3,72E-02	BAX
MAD2L1	other	4,92E-02	BAX
BIRC5	other	4,00E-04	BAX,COL8A1,CTGF,VEGFC	8 (2)
COMP	other	1,25E-02	LGALS3
ECT2	other	3,11E-02	CDC42
BBC3	other	2,49E-02	STMN1
SH2B1	other	4,32E-02	CDH2
WAC	other	3,72E-02	G6PD
EFEMP2	other	1,25E-02	CTGF
CCNL2	other	1,88E-02	BAX
SSRP1	other	1,83E-02	ACTA1,HNRNPK
PRNP	other	2,87E-02	BAX,EIF2S1
TP53BP2	other	5,80E-04	BAX,CTGF
SERPINB5	other	1,03E-06	BAX,CDC42,CDH2,RAC1
LGALS3	other	1,76E-02	COL4A1,IGFBP5,RAC1
LETMD1	other	2,49E-02	BAX
JAM2	other	6,29E-03	CXCL12
RPL22	other	3,11E-02	BAX
MS4A1	other	4,32E-02	BAX
LGALS2	other	2,49E-02	BAX
CUL4B	other	1,50E-03	COL4A1,PSMA1,TPM3
CRP	other	3,00E-02	PSME2,UBE2D3
PRIMA1	other	1,25E-02	BAX
CFL1	other	2,49E-02	DSTN
ACTB	other	5,03E-03	DSTN,STMN1
BAMBI	other	2,49E-02	PENK
IQGAP1	other	4,32E-02	CDC42
ALS2	other	6,29E-03	RAC1
DYSF	other	1,57E-03	ACTR3,ARPC2,CORO1C,LGALS3
CYR61	other	2,38E-02	BAX,VEGFC
DCN	other	4,25E-02	BAX,CTGF
MFAP2	other	2,49E-02	VCAN
LOC100359583/Ptma	other	1,25E-02	BAX
ACTG1	other	4,92E-02	CALD1
ACTA2	other	1,07E-03	ACTA1,CTGF
Mt3	other	2,49E-02	GSTP1
MT3	other	1,88E-02	BAX
HIST4H4	other	4,32E-02	GSTP1
CALCA	other	2,10E-02	GNG12,RAB7A,SNX3
MUC4	other	5,03E-03	CDH2,VTN
Pln	other	4,58E-04	ACTA1,AK1,GNB2L1,RAB10
PALLD	other	2,49E-02	ACTA1
Gm15807/Hmgn5	other	1,06E-03	ACTA1,ATP6AP2,HNRNPK
ADM	other	3,81E-02	BAX,PENK
NET1	other	3,72E-02	CDH2
UIMC1	other	1,88E-02	BAX
mir-128	microrna	2,49E-02	BAX
mir-451	microrna	3,40E-03	PGM1,RAC1
mir-30	microrna	1,62E-02	BAX,CTGF
mir-122	microrna	8,50E-08	CLIC4,CSRP1,FKBP1A,G6PD,IQGAP1,MAPRE1,RBM3,WARS
mir-133	microrna	1,40E-04	CDC42,CTGF,GSTP1,VCAN
mir-135	microrna	1,07E-02	CDH2,CXCL12
mir-142	microrna	1,07E-02	CFL2,DSTN
mir-124	microrna	7,63E-03	IQGAP1,PTBP1
mir-144	microrna	1,86E-04	PGM1,RAC1,VCAN
mir-224	microrna	4,32E-02	CDC42
miR-124-3p (and other miRNAs w/seed AAGGCAC)	mature microrna	1,43E-02	CTGF,IQGAP1,PDLIM7,PGM1,PTBP1
miR-29b-3p (and other miRNAs w/seed AGCACCA)	mature microrna	5,94E-04	ARPC3,CDC42,COL4A1,PPIC
miR-424-3p (miRNAs w/seed AAAACGU)	mature microrna	1,88E-02	LGALS3
miR-16-5p (and other miRNAs w/seed AGCAGCA)	mature microrna	8,77E-03	CFL2,DTD1,HARS,PAFAH1B2,TPM3
miR-141-3p (and other miRNAs w/seed AACACUG)	mature microrna	4,70E-02	BAX,CDH2
miR-377-5p (and other miRNAs w/seed GAGGUUG)	mature microrna	6,29E-03	PRDX6
miR-542-3p (miRNAs w/seed GUGACAG)	mature microrna	8,09E-04	RPL11,RPS28
miR-133a-3p (and other miRNAs w/seed UUGGUCC)	mature microrna	3,85E-03	ATP6AP2,CORO1C,CTGF
miR-140-5p (and other miRNAs w/seed AGUGGUU)	mature microrna	8,09E-04	CXCL12,IGFBP5
miR-30c-5p (and other miRNAs w/seed GUAAACA)	mature microrna	5,02E-03	CTGF,PAFAH1B2,PGM1,TMED10
miR-125b-2-3p (miRNAs w/seed CAAGUCA)	mature microrna	2,49E-02	BAX
miR-138-5p (miRNAs w/seed GCUGGUG)	mature microrna	4,32E-02	VCAN
miR-145-5p (and other miRNAs w/seed UCCAGUU)	mature microrna	4,25E-02	DTD1,TPM3
miR-450a-5p (and other miRNAs w/seed UUUGCGA)	mature microrna	6,29E-03	HNRNPK
miR-199a-3p (and other miRNAs w/seed CAGUAGU)	mature microrna	4,45E-03	PRDX6,VCAN
miR-199a-5p (and other miRNAs w/seed CCAGUGU)	mature microrna	6,27E-03	ACTA1,MYL9
miR-1-3p (and other miRNAs w/seed GGAAUGU)	mature microrna	3,99E-06	ARF4,CNN3,CORO1C,CSRP1,G6PD,PDLIM7,PTBP1,TPM3,TWF1
miR-185-5p (and other miRNAs w/seed GGAGAGA)	mature microrna	4,32E-02	CDC42
PPARA	ligand-dependent nuclear receptor	1,58E-02	ACTA1,CFH,CXCL12,G6PD,GSTP1,IGFBP5,PRDX6
PGR	ligand-dependent nuclear receptor	2,63E-02	CALD1,CSRP1,GAS6,IGFBP5,VCAN
AHR	ligand-dependent nuclear receptor	2,24E-04	ADAMTS2,AKR1A1,BAX,CBR1,CDH2,COL11A1,COL4A1,GAS6,VEGFC
NR3C2	ligand-dependent nuclear receptor	5,13E-04	ARPC2,BAX,CNN3,CTGF,FKBP1A
AR	ligand-dependent nuclear receptor	1,42E-03	ACTA1,ACTR3,CDH2,CXCL12,GSTP1,IGFBP5,PENK,PLOD2,VCAN	70 (12)
ESR1	ligand-dependent nuclear receptor	3,98E-07	AK1,BAX,CALD1,CDC42,CFL2,COL8A1,COPE,COTL1,CPNE1,CXCL12,EIF5A,G6PD,GNG12,IGFBP5,IQGAP1,LGALS1,MARCKS,PDLIM5,PLOD2,PPP2R1A,STC2,THBS3,TMED10,VEGFC,WARS
MELK	kinase	4,92E-02	BAX
IPMK	kinase	3,44E-04	CSRP1,MYL9,PDLIM5
BMPR2	kinase	8,36E-03	CLIC4,CXCL12
ADRBK1	kinase	3,91E-03	ACTA1,BAX
PRKACB	kinase	3,72E-02	PENK
LATS1	kinase	3,72E-02	BAX
SHC1	kinase	1,62E-02	BAX,GSTP1
MKNK1	kinase	3,57E-03	DPYSL3,FLNB,PDLIM5,PTBP1
CDK9	kinase	3,64E-03	G6PD,PTBP1,STC2
TAOK2	kinase	1,88E-02	GSTP1
CAMK4	kinase	1,62E-02	ACTA1,CSRP1
PRKCA	kinase	2,80E-02	ACTA1,ARPC2,CTGF
AKT1	kinase	1,69E-02	BAX,COL4A1,COL8A1,IGFBP5,VCAN
PIK3CA	kinase	3,00E-02	CALD1,CDH2
ATM	kinase	5,94E-04	BAX,CTGF,HSPE1,PSME2	22 (6)
LTK	kinase	1,25E-02	ACTA1
EGFR	kinase	2,24E-05	ACTA1,BAX,CAPZA2,COL8A1,CTGF,CXCL12,HNRNPK,IGFBP5,MARCKS,VCAN	75 (19)
CDKN1A	kinase	1,24E-02	ACP1,BAX,CTGF,LGALS3,STMN1
ERBB4	kinase	1,66E-02	ACTA1,CXCL12,IGFBP5
ERBB3	kinase	1,80E-03	ACTA1,BAX,CXCL12,IGFBP5	38 (7)
SRPK1	kinase	2,49E-02	RAC1
STK11	kinase	1,86E-02	BTF3,CDC42,IGFBP5,RAB10
FGFR2	kinase	3,70E-02	BAX,COL4A1,VEGFC
IKBKG	kinase	4,19E-02	ACTA1,BAX,CXCL12
INSR	kinase	2,57E-02	ACTA1,CBR1,CTGF,IQGAP1,LGALS1,RAB7A
MAP2K3	kinase	9,47E-04	ACTA1,BAX,GSTP1,PRDX6	35 (7)
PRKCB	kinase	4,70E-02	ACTA1,BAX
PGK1	kinase	4,32E-02	ACTA1
ZAP70	kinase	4,85E-02	EDIL3,RBM3
MAPK1	kinase	5,31E-03	CDH2,COL7A1,CTGF,ERP29,LGALS1,LGALS3,PSME2
ERBB2	kinase	2,15E-08	ACTA1,ATP6AP2,CAPZA2,CDH2,COL4A1,COL7A1,CTGF,CXCL12,GAS6,GBE1,HNRNPK,IGFBP5,LGALS1,LGALS3,MYL9,PENK,PGM1,VCAN,VEGFC	62 (11)
GSK3A	kinase	4,92E-02	BAX
CDK7	kinase	4,92E-02	STC2
GSK3B	kinase	2,28E-02	BAX,MAPRE1,RAC1
CAMK2D	kinase	3,40E-03	ACTA1,PPP2R1A
FLT1	kinase	1,11E-03	CLIC4,EIF5A,MARCKS,PTBP1
NME1	kinase	2,50E-03	BAX,CTGF,RAC1	25 (9)
CACNA1C	ion channel	3,72E-02	S100A10
ITGAV	ion channel	1,93E-02	BAX,VTN
KCND2	ion channel	1,25E-02	BAX
BDNF	growth factor	6,01E-04	DPYSL3,FLNB,GAS6,LGALS1,PDLIM5,PENK,PTBP1,S100A10
IGF1	growth factor	3,99E-02	ACTA1,BAX,CTGF,IGFBP5,PENK,VEGFC
AGT	growth factor	1,72E-03	ACTA1,ANGPT1,BAX,COL4A1,CTGF,GSTP1,IGFBP5,RAC1,VEGFC	83 (21)
VEGFA	growth factor	1,75E-02	BAX,CLIC4,CTGF,CXCL12,IGFBP5
TGFA	growth factor	1,46E-02	CTGF,GSTP1,S100A10
GDF9	growth factor	2,27E-02	CTGF,VCAN
FGF1	growth factor	5,88E-03	ACTA1,CTGF,GSTP1,VEGFC	34 (7)
INHA	growth factor	2,73E-02	BAX,CTGF,MYL9
ANGPT1	growth factor	2,50E-02	ACTA1,BAX
NRG1	growth factor	4,52E-02	ANGPT1,CTGF,HNRNPK,VEGFC
NOG	growth factor	3,81E-02	CTGF,VCAN
PROK1	growth factor	3,72E-02	CTGF
FGF2	growth factor	1,57E-03	ANGPT1,BAX,CAPZA2,CXCL12,IGFBP5,PENK,S100A10,VEGFC	59 (18)
CTGF	growth factor	2,67E-02	COL8A1,CTGF,FLNB
TGFB1	growth factor	3,34E-14	ACTA1,ADAMTS2,AK1,ANGPT1,ARF4,ARPC2,BAX,CAB39,CALD1,CDH2,CEMIP,CLIC4,CNN2,CNN3,COL11A1,COL4A1,COL7A1,COL8A1,CORO1C,COTL1,CSRP1,CTGF,CXCL12,DPYSL3,FLNB,GNB2L1,IGFBP5,LGALS3,LOXL1,PDLIM5,PDLIM7,PLOD2,RAC1,RBM3,RSU1,S100A10,STC2,TPM3,VCAN,VEGFC	83 (15)
FIGF	growth factor	3,11E-02	VEGFC
EGF	growth factor	3,62E-03	ANGPT1,CTGF,GSTP1,HNRNPK,IGFBP5,RAC1,S100A10,VCAN,VEGFC	69 (16)
CLEC11A	growth factor	4,70E-02	CDH2,CXCL12
BMP2	growth factor	3,33E-02	CLIC4,CXCL12,IGFBP5,VCAN
TGFB3	growth factor	3,97E-03	ACTA1,CDH2,COL11A1,PLOD2
TGFB2	growth factor	2,60E-02	CTGF,PLOD2,VCAN
TEAD	group	3,72E-02	CTGF
ADRA1	group	3,11E-02	ACTA1
Tgf beta	group	1,53E-02	CDH2,COL7A1,CTGF,HNRNPAB,IGFBP5
P38 MAPK	group	6,60E-03	ANGPT1,BAX,CTGF,CXCL12,IGFBP5,RAB7A,VEGFC	63 (13)
p70 S6k	group	8,36E-03	BAX,CDH2
thymidine phosphorylase	group	6,29E-03	MARCKS
Tropomyosin	group	1,88E-02	TPM3
Jnk	group	7,43E-03	BAX,CDH2,CTGF,CXCL12,VCAN	61 (11)
Aldose Reductase	group	4,32E-02	G6PD
Rock	group	3,04E-03	ACTA1,CDC42,CTGF	20 (3)
P110	group	3,11E-02	COL4A1
Akt	group	1,45E-02	ANGPT1,BAX,CTGF,CXCL12,VCAN
Aspp	group	6,29E-03	BAX
Insulin	group	5,31E-03	ACTA1,COL4A1,G6PD,GSTP1,HNRNPK,PRDX6,RAC1	59 (9)
Fascin	group	1,88E-02	CTGF
endothelin receptor	group	2,49E-02	ACTA1
Lefty	group	2,49E-02	CTGF
Cadherin	group	6,29E-03	CDC42
estrogen receptor	group	6,65E-04	BAX,CALD1,CAPG,COL4A1,COL7A1,CTGF,VEGFC
tryptase	group	4,92E-02	BAX
TH17 Cytokine	group	1,88E-02	LGALS1
FFAR3	g-protein coupled receptor	2,49E-02	BAX
ADGRG3	g-protein coupled receptor	1,25E-02	CDC42
HTR2B	g-protein coupled receptor	1,38E-03	BAX,CDH2
FZD8	g-protein coupled receptor	2,93E-03	CTGF,IGFBP5
HTR2A	g-protein coupled receptor	4,32E-02	CTGF
F2R	g-protein coupled receptor	5,85E-03	ANGPT1,CTGF,CXCL12	26 (9)
GPER1	g-protein coupled receptor	5,63E-03	BAX,CTGF	41 (5)
AGTR2	g-protein coupled receptor	1,43E-02	ACTA1,BAX
CXCR1	g-protein coupled receptor	4,92E-02	BAX
F2RL1	g-protein coupled receptor	4,70E-02	CTGF,VEGFC
ADORA2A	g-protein coupled receptor	1,31E-03	DSTN,EIF5A,HNRNPK,PENK,PPP2R1A
CXCR4	g-protein coupled receptor	4,85E-02	CDH2,CXCL12
ADORA1	g-protein coupled receptor	5,63E-03	BAX,PENK
BDKRB1	g-protein coupled receptor	3,72E-02	CTGF
HTR4	g-protein coupled receptor	3,88E-04	ANGPT1,CXCL12	19 (4)
ACKR3	g-protein coupled receptor	1,07E-02	CFH,CXCL12
CNR1	g-protein coupled receptor	4,99E-02	PENK,RAC1,VEGFC
DRD2	g-protein coupled receptor	1,24E-02	BAX,PENK
CCR5	g-protein coupled receptor	2,27E-02	BAX,CXCL12
HACE1	enzyme	6,29E-03	RAC1
DPAGT1	enzyme	6,29E-03	CTHRC1
ETHE1	enzyme	3,11E-02	BAX
DOHH	enzyme	3,72E-02	PARK7
BIRC6	enzyme	1,88E-02	BAX
CHI3L1	enzyme	1,16E-02	CALD1,IGFBP5
GALNT6	enzyme	1,88E-02	CDH2
ADH1C	enzyme	1,25E-02	ACTA1
MFN2	enzyme	4,92E-02	BAX
C1GALT1	enzyme	4,32E-02	BAX
GALNT3	enzyme	3,11E-02	CDH2
IRS1	enzyme	4,28E-02	ACTR3,COL4A1,COL7A1
RNF144B	enzyme	1,88E-02	BAX
ACTC1	enzyme	1,25E-02	ACTA1
REV1	enzyme	3,72E-02	BAX
RNF40	enzyme	1,07E-03	CXCL12,G6PD
HINT1	enzyme	4,92E-02	BAX
POLR2A	enzyme	4,55E-02	PTBP1,STC2
MAT1A	enzyme	7,63E-03	BAX,PRDX6
HMOX1	enzyme	2,87E-02	ANGPT1,CXCL12,G6PD
ACOX1	enzyme	2,20E-03	CBR1,CXCL12,GSTP1,LGALS3,RBM3
FN1	enzyme	9,13E-03	CDH2,CLIC4,EIF5A,MARCKS,PTBP1
GNAS	enzyme	2,50E-02	CDC42,PENK
RLIM	enzyme	1,71E-03	CDH2,CTGF	10 (5)
TERT	enzyme	9,51E-03	BAX,CALD1,CTGF,PLOD2	10 (3)
TOPORS	enzyme	2,49E-02	BAX
NOS3	enzyme	1,27E-03	ACTA1,CXCL12,GSTP1	11 (3)
NQO1	enzyme	2,27E-02	BAX,CXCL12
PARP1	enzyme	2,10E-02	BAX,CXCL12,VEGFC
KRAS	enzyme	1,63E-03	ACTR3,ARPC3,CDH2,COL4A1,EIF5A,G6PD,RAB7A,VCAN	44 (5)
CD38	enzyme	1,71E-02	GBE1,LGALS3,MANF,PGM1
ARG2	enzyme	2,49E-02	BAX
GNA12	enzyme	1,11E-04	ARPC5,CFL2,G6PD,GSTP1,IQGAP1
FHIT	enzyme	7,12E-04	RAB2A,RAB7A,RAC1
RAC1	enzyme	2,67E-02	CDH2,CTGF,RAC1
RAC2	enzyme	3,13E-02	CDH2,RAC1
FUT4	enzyme	3,11E-02	BAX
TXNRD1	enzyme	3,11E-02	BAX
CEL	enzyme	3,11E-02	BAX
CTBP1	enzyme	1,34E-02	RAC1,VCAN
APC	enzyme	2,40E-02	CDH2,CXCL12,IGFBP5
GPX1	enzyme	3,00E-02	CTGF,PRDX6
PTGS2	enzyme	3,19E-03	ANGPT1,BAX,CXCL12,RAC1,VEGFC	60 (13)
ATG7	enzyme	2,75E-02	CDH2,CTGF
MAD2L2	enzyme	4,32E-02	CDH2
PTGDS	enzyme	4,32E-02	BAX
NOS2	enzyme	2,97E-02	ACTA1,BAX,COL4A1,G6PD
RPN2	enzyme	6,29E-03	GSTP1
HSPA8	enzyme	4,92E-02	MANF
HRAS	enzyme	1,88E-08	ACTA1,CALD1,CAPG,CNN2,COL4A1,CSRP1,CTGF,CXCL12,ERP29,GAS6,IGFBP5,MYL9,PDLIM5,PLOD2,PPIC,PRDX6,RSU1,VCAN	56 (9)
RHOA	enzyme	1,23E-02	ACTA1,BAX,CTGF
PLA2G5	enzyme	4,92E-02	VEGFC
UBR5	enzyme	4,32E-02	BAX
TXN2	enzyme	2,49E-02	RAC1
RRM2B	enzyme	2,49E-02	BAX
SOD1	enzyme	2,64E-04	BAX,CDH2,DPYSL3,GSTP1,PRDX6,RBM3,STMN1	63 (11)
DKK3	cytokine	3,72E-02	ANGPT1
CKLF	cytokine	1,88E-02	BAX
CXCL8	cytokine	1,06E-02	BAX,LGALS3,RAC1
PRL	cytokine	5,21E-05	ACTR3,CNN3,CTSA,DDX39B,IGFBP5,PENK,PSME1,PSME2,TPM3
IL3	cytokine	2,56E-04	AKR1A1,CAPZB,NACA,PSME1,RBM3,RPL11,RPS12,RPS20,SNRPD2
IL4	cytokine	2,51E-02	BAX,CAPG,CTGF,EIF2S1,GBE1,LGALS1,LGALS3,PLOD2,PSME1,S100A10
SPP1	cytokine	2,53E-02	ANGPT1,BAX,CDH2,CXCL12
CSF2	cytokine	2,30E-02	AKR1A1,BAX,CFH,COL8A1,NACA,RBM3,STMN1
CD40LG	cytokine	3,34E-02	BAX,CTGF,EIF2S1,MARCKS,PSME1,PSME2
IL17A	cytokine	8,42E-03	COTL1,CTGF,CXCL12,EDIL3,VEGFC	63 (16)
TNF	cytokine	3,16E-03	ACTA1,ANGPT1,ARF4,BAX,CDC42,CDH2,CLIC4,COTL1,CTGF,CXCL12,GSTP1,IGFBP5,LGALS3,PENK,PLOD2,PSME1,PSME2,RAC1,STMN1,VEGFC	75 (17)
IL1A	cytokine	4,65E-02	BAX,CXCL12,IGFBP5,VEGFC
IL13	cytokine	3,23E-02	BAX,BLVRA,CTGF,FKBP1A,G6PD,GAS6
IFNG	cytokine	2,81E-02	BAX,CLIC4,CTGF,CXCL12,GAS6,GNB2L1,KCTD12,LGALS3,PENK,PSME1,PSME2,S100A10,VEGFC,WARS
TNFSF10	cytokine	1,98E-02	ANGPT1,BAX,PSME2
EPO	cytokine	9,14E-03	BAX,CXCL12,ILF2,NACA,VEGFC,WDR1	23 (7)
EDN1	cytokine	3,83E-06	ACTA1,CDC42,CDH2,COL4A1,COL7A1,CTGF,TPM3,VCAN,VEGFC	66 (18)
CCL11	cytokine	4,25E-02	CXCL12,VEGFC
IL1B	cytokine	2,75E-03	ANGPT1,BAX,CTGF,CXCL12,G6PD,GAS6,IGFBP5,PENK,PSME2,S100A10,UBE2V2,VCAN,VEGFC	67 (18)
WNT3A	cytokine	3,48E-03	ANGPT1,CDH2,CTGF,CXCL12,IGFBP5,KCTD12	43 (8)
PI3K (complex)	complex	3,14E-02	CDH2,CTGF,G6PD,GSTP1,STMN1
CD3	complex	2,34E-03	ACTR3,EDIL3,FKBP1A,G6PD,HSPE1,IGFBP5,ILF2,RAB2A,RBM3,STMN1,UBE2V1
Pka	complex	1,03E-02	BAX,CDH2,CTGF,PENK
F Actin	complex	1,88E-02	CTGF
Pdgf (complex)	complex	2,22E-02	BAX,COL4A1,EIF2S1
Pdgf Ab	complex	1,86E-04	ANGPT1,COL8A1,VEGFC
Ifn gamma	complex	1,87E-02	IGFBP5,PSME1,PSME2
FSH	complex	1,72E-04	ACTA1,CAPZA1,CDH2,CTGF,NEO1,PENK,PPP1CB,PPP2R1A,RAB2A,VEGFC	17 (5)
Cg	complex	2,30E-02	BAX,CDH2,COL11A1,S100A10,VCAN,VEGFC
Collagen type I	complex	5,21E-05	BAX,CDH2,PLOD2,RAC1,S100A10
Lh	complex	2,02E-02	ACTA1,CAPZA1,PPP2R1A,RAB2A,VEGFC
TSH	complex	4,85E-02	ERP29,IGFBP5
Collagen type VI	complex	2,49E-02	BAX
pirinixic acid	chemical toxicant	7,40E-07	BAX,CDH2,CFH,CXCL12,FKBP1A,G6PD,GBE1,HSPE1,LGALS3,PGM1,PPIC,PSMA1,PSME1,TBCA
sulfadimethoxine	chemical toxicant	3,11E-02	GSTP1
paraquat	chemical toxicant	3,38E-02	BAX,CTGF,GSTP1
4-vinyl-1-cyclohexene dioxide	chemical toxicant	1,88E-02	BAX
dimethylnitrosamine	chemical toxicant	3,26E-02	COL4A1,IGFBP5
allyl isothiocyanate	chemical toxicant	4,92E-02	BAX
cytochalasin D	chemical toxicant	2,75E-02	ACTA1,CTGF
methoxychlor	chemical toxicant	1,07E-03	BAX,G6PD
3-nitropropionic acid	chemical toxicant	4,54E-03	BAX,CBR1,PENK	39 (4)
ochratoxin A	chemical toxicant	5,07E-04	BAX,CDH2,GSTP1
1-methyl-4-phenyl-1,2,3,6-tetrahydropyridine	chemical toxicant	9,07E-03	BAX,PARK7,PENK	38 (4)
n-nitrosomethylbenzylamine	chemical toxicant	1,11E-02	ARPC2,BAX,GNG12,YWHAH
tetrachlorodibenzodioxin	chemical toxicant	2,19E-03	AKR1A1,ANGPT1,BAX,CBR1,MANF,RAB10,STC2,VEGFC	13 (2)
thioacetamide	chemical toxicant	2,02E-02	CTGF,LGALS1,LGALS3,RBM3,S100A10
AN-207	chemical toxicant	1,25E-02	BAX
latrunculin A	chemical toxicant	4,32E-02	DSTN
glyoxal	chemical toxicant	1,25E-02	BAX
methylnitrosourea	chemical toxicant	1,06E-03	GSTP1,PSME1,RPS12
carbon tetrachloride	chemical toxicant	8,59E-03	BAX,CTGF,FKBP1A,GSTP1,IGFBP5	62 (14)
butylated hydroxyanisol	chemical toxicant	1,34E-02	CBR1,GSTP1
lead nitrate	chemical toxicant	1,17E-04	BAX,GSTP1
Sn50 peptide	chemical toxicant	6,13E-03	BAX,CTGF,GNB2L1
forskolin	chemical toxicant	2,54E-04	ACTA1,ATP6AP2,CDH2,CTGF,EIF5A,GSTP1,IGFBP5,PENK,PPP2R1A,RAB7A,RPS20,S100A10,VCAN	63 (10)
carbenoxolone	chemical toxicant	6,94E-03	BAX,CTGF
beta-naphthoflavone	chemical toxicant	3,85E-03	BAX,CBR1,GSTP1
6-hydroxydopamine	chemical toxicant	1,46E-02	BAX,PENK,UBE2D3
dichlorovinylcysteine	chemical toxicant	1,43E-02	AKR1A1,PSMA1
ethionine	chemical toxicant	2,50E-02	LGALS3,S100A10
lead acetate	chemical toxicant	4,92E-02	GSTP1
cadmium	chemical toxicant	1,10E-02	BAX,HNRNPK,LGALS3
2',3'-dialdehyde ATP	chemical reagent	4,92E-02	BAX
5-N-ethylcarboxamido adenosine	chemical reagent	2,67E-02	CTGF,RAC1,VCAN
8-bromo-cAMP	chemical reagent	2,40E-02	CDC42,CTGF,GSTP1,VEGFC
galactosylceramide-alpha	chemical reagent	2,75E-02	CTGF,LGALS3
Diphtheria Toxin	chemical reagent	4,45E-03	ACTA1,PENK
CCG-1423	chemical reagent	1,88E-02	CTGF
sulfinosine	chemical reagent	4,32E-02	GSTP1
2-bromoethylamine	chemical reagent	3,64E-03	LGALS3,RBM3,S100A10
BR-4628	chemical reagent	1,25E-02	CTGF
MIA-459	chemical reagent	3,72E-02	BAX
MIA-313	chemical reagent	3,72E-02	BAX
RO0281675	chemical reagent	6,29E-03	BAX
TO-901317	chemical reagent	1,40E-02	CFH,G6PD,GBE1,LGALS3,PSME1
1,2-dithiol-3-thione	chemical reagent	8,27E-07	AKR1A1,CBR1,DDX39B,DSTN,EIF2S1,ERP29,GBE1,GNB2L1,GSTP1,PSMA1	13 (2)
fenamic acid	chemical reagent	9,44E-03	LGALS3,RBM3,S100A10
2,4-dichlorobenzamil	chemical reagent	6,29E-03	CTGF
latrunculin B	chemical reagent	2,08E-03	ACTA1,CTGF	20 (3)
5-nitro-2-(3-phenylpropylamino)benzoic acid	chemical reagent	4,92E-02	BAX
lanthanum chloride	chemical reagent	1,88E-02	BAX
(des-Arg10,Leu9)-kallidin	chemical reagent	6,29E-03	CTGF
N-formyl-Met-Leu-Phe	chemical reagent	2,87E-02	CAPG,CORO1C
carbon	chemical reagent	6,29E-03	GSTP1
S-nitroso-N-acetylpenicillamine	chemical reagent	1,72E-02	CXCL12,S100A10
metribolone	chemical reagent	3,61E-02	BAX,IGFBP5,PGM3,VCAN
barium	chemical reagent	1,25E-02	PENK
sulprostone	chemical drug	1,88E-02	VEGFC
istradefylline	chemical drug	1,88E-02	PENK
allopurinol	chemical drug	1,60E-02	LGALS3,RBM3,S100A10
5-fluorouracil	chemical drug	1,49E-10	BAX,BTF3,FKBP1A,HNRNPAB,HSPE1,ILF2,NACA,PSMD2,PSME1,PSME2,RBMX,RPL11,RPS28,SNRPD2
streptozocin	chemical drug	4,33E-02	BAX,COL4A1,CTGF,LGALS3
fulvestrant	chemical drug	5,51E-06	BAX,CXCL12,FKBP1A,G6PD,GSTP1,IGFBP5,MANF,RAB2A,RAC1,STMN1	61 (11)
GCS-100	chemical drug	4,92E-02	LGALS3
dexamethasone	chemical drug	3,31E-09	ACTR3,ADAMTS2,BAX,CBR1,CLIC4,CNN3,COL11A1,COL4A1,COL7A1,CPA4,CTGF,CXCL12,FLNB,G6PD,GSTP1,HARS,HNRNPAB,IGFBP5,ILF2,IQGAP1,LGALS3,MARCKS,PENK,PLOD2,PRDX6,PSMA1,S100A10,TWF1,VCAN,VEGFC,WARS,WDR1	81 (15)
VX-944	chemical drug	1,25E-02	BAX
aliskiren	chemical drug	1,88E-02	ATP6AP2
atiprimod	chemical drug	1,25E-02	BAX
hesperidin	chemical drug	3,11E-02	BAX
sitagliptin	chemical drug	1,88E-02	CXCL12
rasagiline	chemical drug	2,38E-02	BAX,GNB2L1
tozasertib	chemical drug	2,49E-02	BAX
diosmin	chemical drug	1,88E-02	BAX
AEOL 10113	chemical drug	6,29E-03	BAX
tosedostat	chemical drug	1,52E-02	STC2,WARS
2-(3-chlorophenylamino)phenylacetic acid	chemical drug	1,88E-02	COL4A1
black raspberry extract	chemical drug	3,46E-02	ARPC2,GNG12,YWHAH
Oxi-4503	chemical drug	6,29E-03	CXCL12
GEM231	chemical drug	1,88E-02	BAX
cerebrolysin	chemical drug	1,88E-02	BAX
bucillamine	chemical drug	1,25E-02	BAX
hydrogel	chemical drug	4,32E-02	CDH2
APR-246	chemical drug	1,25E-02	BAX
ponesimod	chemical drug	4,92E-02	CTGF
proteasome inhibitor	chemical drug	4,92E-02	BAX
intralipid	chemical drug	4,92E-02	PENK
gentamicin C	chemical drug	7,36E-03	LGALS3,RBM3,S100A10
ciprofloxacin	chemical drug	5,02E-03	COLEC12,CPNE1,CTSA,EDIL3
sirolimus	chemical drug	3,72E-06	BAX,EIF2S1,G6PD,GNB2L1,GSTP1,IGFBP5,PGM1,RPS12,RPS20,RPS21,SNRPD2,STMN1,TPM3	30 (2)
BO-653	chemical drug	2,49E-02	PSMA1
cetrorelix	chemical drug	3,40E-03	BAX,VEGFC
nicorandil	chemical drug	4,32E-02	BAX
iopanoic acid	chemical drug	6,29E-03	G6PD
cephaloridine	chemical drug	2,60E-02	CTGF,G6PD,GSTP1
NCX-4040	chemical drug	4,92E-02	GSTP1
ifosfamide	chemical drug	3,72E-02	PSMA1
tacrolimus	chemical drug	7,59E-03	ACTA1,ANGPT1,BAX,DPYSL3,VEGFC	46 (13)
resiquimod	chemical drug	5,91E-04	CXCL12,PARK7,PRDX6,RAB7A,STMN1,WARS
pimagedine	chemical drug	1,50E-03	BAX,COL4A1,CTGF	11 (3)
rosiglitazone	chemical drug	4,72E-02	ACTA1,BAX,CTGF,IGFBP5,PENK,TPM3
raloxifene	chemical drug	2,31E-02	CXCL12,FLNB,RAB2A,RAC1
bortezomib	chemical drug	2,80E-03	BAX,CXCL12,HSPE1,PSMA1,PSMD2,UCHL1	12 (3)
phenylbutazone	chemical drug	6,43E-03	LGALS3,RBM3,S100A10
indomethacin	chemical drug	2,13E-05	ANGPT1,BAX,LGALS3,MANF,RBM3,RPS21,RPS28,S100A10,VCAN	23 (4)
trichostatin A	chemical drug	9,84E-03	ANGPT1,BAX,COLEC12,G6PD,PENK,S100A10,STMN1,VEGFC,YWHAH	62 (11)
coumarin	chemical drug	3,72E-02	GSTP1
amphetamine	chemical drug	1,71E-02	BAX,CDH2,UCHL1
XK469	chemical drug	1,25E-02	BAX
omeprazole	chemical drug	3,43E-03	CBR1,CTGF,CXCL12
sulforafan	chemical drug	4,28E-02	BAX,GSTP1,PGM3
docetaxel	chemical drug	4,10E-02	BAX,GSTP1
nitrofurantoin	chemical drug	4,05E-03	BAX,GSTP1,LGALS3,S100A10,STMN1
sulindac sulfide	chemical drug	9,82E-03	CTGF,PPP2R1A,STC2
ranitidine	chemical drug	3,11E-02	PENK
losartan potassium	chemical drug	3,01E-02	ANGPT1,BAX,CTGF
fenoldopam	chemical drug	3,11E-02	RAC1
telmisartan	chemical drug	4,70E-02	BAX,CTGF
methotrexate	chemical drug	1,81E-02	CFH,COL4A1,CXCL12,IGFBP5,RAC1
captopril	chemical drug	1,18E-02	LGALS3,RBM3,S100A10
trimetazidine	chemical drug	1,88E-02	CTGF
memantine	chemical drug	2,38E-02	BAX,GSTP1
cilazapril	chemical drug	2,49E-02	ACTA1
carboplatin	chemical drug	3,96E-02	LGALS3,RBM3
chlorambucil	chemical drug	3,11E-02	BAX
pravastatin	chemical drug	4,70E-02	BAX,COTL1
simvastatin	chemical drug	8,95E-03	BAX,CALD1,COTL1,CTGF,RAC1
calcitriol	chemical drug	2,45E-02	BAX,COL4A1,G6PD,IGFBP5,KCTD12,LGALS1,STMN1
seocalcitol	chemical drug	6,13E-03	ACTR3,IGFBP5,PDLIM7
fenfluramine	chemical drug	1,25E-02	PENK
2-amino-1-methyl-6-phenylimidazo-4-5-b-pyridine	chemical drug	1,68E-04	BAX,HSPE1,PSME1,RAB2A
triamterene	chemical drug	8,36E-03	LGALS3,RBM3,S100A10
ofloxacin	chemical drug	1,88E-02	BAX
lomustine	chemical drug	7,68E-03	LGALS3,RBM3,S100A10
phenacetin	chemical drug	2,87E-02	LGALS3,S100A10
SSR180575	chemical drug	1,25E-02	BAX
venlafaxine	chemical drug	4,92E-02	BAX
fingolimod	chemical drug	4,25E-02	BAX,CTGF
suramin	chemical drug	1,34E-02	ACTR3,CDH2
ramipril	chemical drug	1,16E-02	COL4A1,CTGF
quinapril	chemical drug	3,72E-02	CTGF
ST1926	chemical drug	7,63E-05	ARPC2,ARPC3,EIF5A,ILF2,LGALS1,NACA,SNRPD2
amlodipine	chemical drug	1,05E-04	ACTA1,IGFBP5,S100A10
probucol	chemical drug	7,63E-03	CTGF,PSMA1
salirasib	chemical drug	3,22E-04	LGALS1,PGM1,PLOD2,VEGFC
cisplatin	chemical drug	1,74E-04	BAX,CTGF,G6PD,GSTP1,LGALS3,MARCKS,NEO1,PSMA1,RAC1,RBM3,RPS21,S100A10,STMN1	64 (10)
imisopasem manganese	chemical drug	1,25E-02	BAX
CD 437	chemical drug	6,92E-07	ARPC2,ARPC3,BAX,EIF5A,ILF2,LGALS1,NACA,RBMX,RPL11,SNRPD2
alpha-tocopherol	chemical drug	1,07E-02	BAX,CTGF
actinomycin D	chemical drug	2,28E-03	BAX,CDH2,CTGF,GSTP1,IGFBP5,VEGFC	62 (16)
BQ 123	chemical drug	4,32E-02	CTGF
doxorubicin	chemical drug	1,00E-02	BAX,CTGF,EIF5A,LGALS3,RBM3,S100A10,STMN1
andrographolide	chemical drug	1,72E-02	BAX,GSTP1
betulinic acid	chemical drug	1,43E-02	BAX,CXCL12
heroin	chemical drug	3,72E-02	PENK
lisofylline	chemical drug	1,88E-02	COL4A1
pergolide	chemical drug	3,11E-02	BAX
ciprofibrate	chemical drug	1,37E-02	CBR1,CXCL12,GSTP1,RBM3
curcumin	chemical drug	6,21E-03	AKR1A1,ATP6AP2,BAX,CTGF,GSTP1,IGFBP5,NEO1	56 (13)
thioctic acid	chemical drug	4,70E-02	BAX,PARK7
AGN194204	chemical drug	3,75E-03	CLIC4,COTL1,CSRP1,LGALS1,PENK
edelfosine	chemical drug	1,25E-02	BAX
decitabine	chemical drug	2,16E-04	BAX,CDH2,COL7A1,CTGF,GSTP1,LGALS3,RPL11,S100A10,UCHL1,VCAN,VTN
zalcitabine	chemical drug	2,49E-02	CXCL12
N-nitro-L-arginine methyl ester	chemical drug	1,71E-02	ACTA1,BAX,CTGF
N-acetyl-L-cysteine	chemical drug	3,61E-02	ACTA1,BAX,CTGF,GSTP1
lipopolysaccharide	chemical drug	1,14E-05	ACTA1,BAX,CDH2,CEMIP,CLIC4,COL4A1,CTGF,CXCL12,G6PD,GSTP1,IGFBP5,LGALS1,LGALS3,MARCKS,MYL9,PARK7,PENK,PPP1CB,PSME1,PSME2,STMN1,UCHL1,VCAN,VEGFC,VTN,WARS	76 (15)
phorbol myristate acetate	chemical drug	4,79E-05	ANGPT1,ARF4,BAX,CAPG,CDC42,CMPK1,CTGF,EDF1,EIF5A,GLRX3,GNB2L1,GSTP1,HNRNPK,IGFBP5,S100A10,TPM3,VCAN,VEGFC	82 (19)
ouabain	chemical drug	2,62E-02	ACTA1,YWHAH
estrogen	chemical drug	8,28E-03	CTGF,CXCL12,G6PD,IGFBP5,LGALS1,PENK	52 (12)
mifepristone	chemical drug	3,40E-02	BAX,CTGF,GAS6,PSMA1,VCAN
mibolerone	chemical drug	1,71E-03	ARF4,EIF2S1,ERP29,FKBP1A,STMN1
finasteride	chemical drug	6,94E-03	BAX,PENK
tetraethylammonium	chemical drug	2,50E-02	GSTO1,PARK7
benzyloxycarbonyl-Leu-Leu-Leu aldehyde	chemical - protease inhibitor	2,41E-03	BAX,CTGF,EIF5A,GSTP1,PSMD2,RAC1,STMN1	57 (10)
Z-IETD-FMK	chemical - protease inhibitor	3,11E-02	BAX
N-Ac-leucyl-leucyl-methioninal	chemical - protease inhibitor	4,32E-02	BAX
lactacystin	chemical - protease inhibitor	7,43E-03	EIF5A,GSTP1,IGFBP5,RAC1,STMN1	36 (8)
reactive nitrogen species	chemical - other	1,25E-02	BAX
cation	chemical - other	1,25E-02	GSTP1
doramapimod	chemical - kinase inhibitor	2,49E-02	CTGF
IND S1	chemical - kinase inhibitor	8,36E-03	HIBCH,PSMA1
IND S7	chemical - kinase inhibitor	1,34E-02	ERP29,PSMA1
MEL T1	chemical - kinase inhibitor	4,45E-03	HIBCH,PSMA1
MEL S3	chemical - kinase inhibitor	1,43E-02	ERP29,PSMA1
PD98059	chemical - kinase inhibitor	7,28E-03	ACTR3,BAX,CDH2,COL4A1,CTGF,HNRNPAB,S100A10,VCAN,VEGFC	66 (15)
GW 5074	chemical - kinase inhibitor	8,09E-04	ATP6AP2,BAX
SB203580	chemical - kinase inhibitor	3,69E-04	BAX,CDH2,CTGF,ERP29,GSTP1,PENK,S100A10,STC2,VEGFC	73 (13)
H89	chemical - kinase inhibitor	4,63E-02	BAX,GSTP1,IGFBP5
SP600125	chemical - kinase inhibitor	1,88E-03	ATP6AP2,BAX,COL7A1,COL8A1,CTGF,PAFAH1B2	18 (3)
aucubin	chemical - endogenous non-mammalian	6,29E-03	BAX
loganin	chemical - endogenous non-mammalian	1,25E-02	CTGF
ergosterol-5,8-peroxide	chemical - endogenous non-mammalian	1,88E-02	CTGF
Mellitin	chemical - endogenous non-mammalian	1,25E-02	BAX
E. coli serotype 0127B8 lipopolysaccharide	chemical - endogenous non-mammalian	2,92E-02	CTGF,CXCL12,GNB2L1,LGALS3
baicalin	chemical - endogenous non-mammalian	3,53E-02	CBR1,IGFBP5
nomilin	chemical - endogenous non-mammalian	3,72E-02	BAX
cercosporin	chemical - endogenous non-mammalian	1,88E-02	CTGF
daphnoretin	chemical - endogenous non-mammalian	1,25E-02	BAX
benzyl isothiocyanate	chemical - endogenous non-mammalian	8,36E-03	BAX,GSTP1
bilobalide	chemical - endogenous non-mammalian	2,49E-02	BAX
glyceollin	chemical - endogenous non-mammalian	1,88E-02	ANGPT1
3,4-dihydroxybenzaldehyde	chemical - endogenous non-mammalian	1,88E-02	PARK7
isoliquiritigenin	chemical - endogenous non-mammalian	5,03E-03	BAX,CTGF	15 (4)
bisphenol A	chemical - endogenous non-mammalian	2,67E-02	BAX,CTGF,CXCL12
jasplakinolide	chemical - endogenous non-mammalian	3,72E-02	CTGF
isoalantolactone	chemical - endogenous non-mammalian	1,25E-02	BAX
baicalein	chemical - endogenous non-mammalian	3,13E-02	BAX,PRDX6
tangeretin	chemical - endogenous non-mammalian	4,92E-02	BAX
swainsonine	chemical - endogenous non-mammalian	1,25E-02	BAX
ryanodine	chemical - endogenous non-mammalian	2,08E-03	ACTA1,CDC42
S-allyl-L-cysteine	chemical - endogenous non-mammalian	4,32E-02	BAX
honokiol	chemical - endogenous non-mammalian	1,93E-02	BAX,IQGAP1
agar	chemical - endogenous non-mammalian	6,29E-03	RBM3
platelet activating factor	chemical - endogenous mammalian	3,67E-02	GAS6,PAFAH1B2
cyclic AMP	chemical - endogenous mammalian	2,31E-02	CDC42,CDH2,CTGF,IGFBP5,PENK
L-tyrosine	chemical - endogenous mammalian	1,88E-02	BAX
beta-estradiol	chemical - endogenous mammalian	5,73E-04	ACTA1,ANGPT1,BAX,CDC42,CDH2,CNN2,COLEC12,CTGF,CXCL12,EIF2S1,G6PD,GSTP1,HNRNPK,IGFBP5,IQGAP1,LGALS3,PENK,PSMA1,RAB2A,RAC1,STC2,VCAN,YWHAH	77 (17)
ursodeoxycholic acid	chemical - endogenous mammalian	5,94E-04	BAX,COL4A1,CTGF,LGALS3	45 (6)
prostaglandin E2	chemical - endogenous mammalian	2,36E-03	ANGPT1,BAX,CTGF,CXCL12,IGFBP5,PENK,VEGFC	60 (18)
UTP	chemical - endogenous mammalian	1,16E-02	CDH2,VTN
hydrocortisone	chemical - endogenous mammalian	9,03E-03	CTGF,ERP29,IGFBP5,STC2
fingolimod phosphate	chemical - endogenous mammalian	4,32E-02	CTGF
advanced glycation end-products	chemical - endogenous mammalian	2,34E-03	BAX,CTGF,CXCL12	41 (10)
niacinamide	chemical - endogenous mammalian	3,13E-02	BAX,G6PD
nitric oxide	chemical - endogenous mammalian	3,37E-03	BAX,CTGF,CXCL12,DPYSL3,GSTP1	68 (18)
nicotinic acid	chemical - endogenous mammalian	1,43E-02	ANGPT1,G6PD
quinolinic acid	chemical - endogenous mammalian	3,13E-02	BAX,PENK
ethanol	chemical - endogenous mammalian	2,54E-02	ACTA1,BAX,CBR1,CLIC4,CTGF,LGALS1
thyroid hormone	chemical - endogenous mammalian	2,87E-02	ACTA1,G6PD,RAB2A,S100A10
sphingosine-1-phosphate	chemical - endogenous mammalian	1,46E-02	ANGPT1,CTGF,VEGFC
formaldehyde	chemical - endogenous mammalian	1,34E-02	BAX,PENK
butyric acid	chemical - endogenous mammalian	1,86E-02	BAX,CDC42,COL11A1,COL4A1,GSTP1,IQGAP1,TWF1
4-nitrophenol	chemical - endogenous mammalian	1,25E-02	BAX
tretinoin	chemical - endogenous mammalian	3,37E-03	AKR1A1,CBR1,CDC42,COL4A1,COTL1,CTGF,DPYSL3,GSTP1,HNRNPK,IGFBP5,LGALS1,PENK,RPL11,RPS12,RPS20,S100A10,UBE2D3,VEGFC	74 (14)
goralatide	chemical - endogenous mammalian	3,72E-02	LGALS3
10-hydroxycamptothecin	chemical - endogenous mammalian	1,88E-02	BAX
azelaic acid	chemical - endogenous mammalian	3,11E-02	BAX
citric acid	chemical - endogenous mammalian	3,11E-02	BAX
N(6)-carboxymethyl-L-lysine	chemical - endogenous mammalian	1,25E-02	CTGF
3,5-diiodothyronine	chemical - endogenous mammalian	2,08E-03	AK1,PGM1
glutamyl-Se-methylselenocysteine	chemical - endogenous mammalian	5,03E-03	GSTP1,PSME1
selenomethylselenocysteine	chemical - endogenous mammalian	8,36E-03	PSME1,RPS12
L-dopa	chemical - endogenous mammalian	9,11E-05	ABHD14B,BAX,CAPG,COL4A1,COTL1,CXCL12,IGFBP5,IQGAP1,PENK,PTBP1,S100A10,TMED10,VTN,WDR1
L-triiodothyronine	chemical - endogenous mammalian	6,31E-03	ACTA1,CAPZA1,CBR1,COL4A1,CTGF,CXCL12,G6PD	66 (10)
D-glucose	chemical - endogenous mammalian	4,42E-04	ARF4,ATP6AP2,BAX,CALD1,COL4A1,CTGF,G6PD,HNRNPK,PGM1,PRDX6,WARS
allopregnanolone	chemical - endogenous mammalian	1,71E-03	LGALS3,PENK
tauroursodeoxycholic acid	chemical - endogenous mammalian	3,40E-03	BAX,CTGF
dehydroisoandrosterone	chemical - endogenous mammalian	1,10E-02	GNB2L1,LGALS3,PRDX6
aldosterone	chemical - endogenous mammalian	3,54E-02	ACTA1,CTGF,FKBP1A
dihydrotestosterone	chemical - endogenous mammalian	6,08E-06	ACTA1,BAX,CDH2,COL4A1,CTGF,GLRX3,GSTP1,IGFBP5,LGALS1,RAB2A,RPS12,RPS20,RPS28,VCAN	76 (17)
testosterone	chemical - endogenous mammalian	4,98E-03	BAX,CDH2,EIF2S1,HNRNPK,PSMA1,RAB2A,VCAN	54 (10)
epiallopregnanolone	chemical - endogenous mammalian	1,88E-02	LGALS3
progesterone	chemical - endogenous mammalian	1,07E-02	ACTA1,BAX,CDH2,CXCL12,G6PD,GAS6,IGFBP5,LGALS1,LGALS3
beta-tocopherol	chemical - endogenous mammalian	6,29E-03	CTGF
phosphate	chemical - endogenous mammalian	2,63E-03	ADAMTS2,BLVRA,CPNE1,STC2
bevacizumab	biologic drug	8,09E-04	ANGPT1,CXCL12
GnRH analog	biologic drug	1,21E-03	ACP1,FKBP1A,GSTO1,PDLIM5,SNX3,TWF1,UBE2D3,UBE2V1
propolis	biologic drug	3,11E-02	VTN
interferon beta-1a	biologic drug	1,06E-03	FKBP1A,GSTP1,LGALS1,PSME1,RPS28
glucagon	biologic drug	4,55E-02	GNG12,SNX3
vancomycin	biologic drug	1,71E-02	LGALS3,RBM3,S100A10
zinostatin	biologic drug	4,32E-02	BAX
desmopressin	biologic drug	1,93E-02	CAPG,GNG12,SNX3
exenatide	biologic drug	1,52E-02	BAX,CTGF
cyclosporin A	biologic drug	2,00E-02	BAX,CTGF,EDIL3,LGALS3,RBM3,S100A10,YWHAH

## Sheet: A MSC 
© 2000-2016 QIAGEN. All rights reserved.
Upstream Regulator	Molecule Type	p-value of overlap	Target molecules in dataset	Mechanistic Network
SLC4A5	transporter	2,15E-02	SPTBN1
ATP6AP2	transporter	3,20E-02	TGFB1
SLC9A6	transporter	2,15E-02	APP
ABCA7	transporter	3,20E-02	APP
AQP11	transporter	1,69E-03	TGFB1,TIMP1
TRPC4AP	transporter	1,08E-02	APP
ABCB4	transporter	3,29E-08	COL1A1,COL1A2,MMP2,SERPINE1,SPARC,TGFB1,TIMP1
SORCS1	transporter	1,08E-02	APP
SRI	transporter	1,08E-02	HSPA5
SLC13A1	transporter	4,88E-04	ACLY,ACTG1,EEF1G,HSPA5,HSPA8,HSPB1
TTR	transporter	4,25E-02	APP
ALB	transporter	1,28E-03	ALB,COL1A1,HSPA5,TGFB1	100 (16)
AFM	transporter	2,15E-02	APOE
SLC11A2	transporter	2,15E-02	APP
Abcb1b	transporter	2,15E-02	APP
GGA1	transporter	4,25E-02	APP
APBA1	transporter	2,15E-02	APP
GJA1	transporter	4,65E-02	THBS1,VIM
SNX17	transporter	4,25E-02	APP
BSG	transporter	1,60E-05	MMP1,MMP2,MMP3,TGFB1,VIM	153 (20)
LCN2	transporter	3,42E-04	ACTN1,MMP2,MSN,TAGLN2,VIM	48 (5)
APBA2	transporter	1,08E-02	APP
ABCG1	transporter	4,39E-02	APP,TGFB1
BCL2	transporter	2,79E-02	IGFBP6,MMP2,TIMP1,TIMP2
LDLR	transporter	2,93E-03	APOE,BGN,HSPA5,HSPG2,MMP2	114 (19)
S100A6	transporter	3,89E-02	INHBA,TPM4
SYVN1	transporter	1,55E-05	APP,EXT2,GANAB,HSPB1,LDHB,LGALS3BP,PCBP1,PFN1,SLC3A2
BAX	transporter	1,86E-02	ERO1A,PDIA6,TIMP1
SLC2A1	transporter	9,93E-05	FN1,MMP2,SERPINE1	92 (14)
GGA3	transporter	4,25E-02	APP
FOLR1	transporter	5,47E-04	ACTN4,LAMB2,PFN1,SLC3A2,TAGLN2,TPI1
UCP1	transporter	7,00E-04	EEF1A1,GARS,PGD,SERPINE1,SLC3A2,SND1,TGFB1
AP2A1	transporter	6,85E-04	APP,TALDO1
APOE	transporter	3,12E-13	APOE,APP,BGN,CLU,COL1A1,ECM1,EMILIN1,HSP90AB1,HSPD1,HSPG2,IGFBP6,LTBP1,LTBP2,MMP2,MMP3,PTX3,SERPINE1,TGFB1,TIMP1,VCP	161 (21)
VLDLR	transporter	4,25E-02	SERPINE1
SFTPA1	transporter	1,49E-04	ANPEP,COL1A1,ECM1,LOX,SERPINE1,TGFB1	132 (12)
LASP1	transporter	4,25E-02	VIM
COMMD1	transporter	1,43E-03	ALDOA,LDHA,PGK1	97 (7)
SLC12A6	transporter	3,20E-02	VIM
KDELR1	transporter	1,08E-02	HSPA5
ATP2A1	transporter	4,25E-02	HSPA5
APOA1	transporter	1,39E-03	APOE,APP,HSPA5,TGFB1	109 (19)
SORL1	transporter	2,15E-02	APP
SLC37A4	transporter	4,25E-02	HSPA5
ABCA1	transporter	8,08E-04	ANXA1,APOE,APP,HSPA5	89 (17)
STAU1	transporter	8,36E-03	KRT1,KRT10
NRXN1	transporter	4,65E-02	TGFB1,THBS1
VPS26A	transporter	2,15E-02	APP
HBB	transporter	1,41E-04	COL1A2,SERPINE1,TGFB1	35 (5)
SLC25A13	transporter	3,87E-03	ACLY,ANXA2,APP,CD248,SERPINE2
APOC1	transporter	1,08E-02	APOE
PLN	transporter	6,98E-13	AHSG,ALDOA,ANXA2,CALU,ENO1,EZR,GNAI2,HSP90B1,PGK1,TPI1,VCP,VIM
NGB	transporter	2,15E-02	APP
ZFYVE16	transporter	2,15E-02	SERPINE1
IGF1R	transmembrane receptor	3,65E-10	ACTN4,ALDOA,ATP5B,CALU,CLU,COL1A1,COL3A1,COL4A2,FLNC,HSPA5,HTRA1,IGFBP3,IGFBP4,KRT5,LASP1,TGFB1,TGFBI	156 (19)
SEMA7A	transmembrane receptor	9,57E-08	COL1A1,COL1A2,COL3A1,FN1,TGFB1,TIMP1	61 (6)
TNFRSF1B	transmembrane receptor	1,16E-03	MMP1,MMP2,MMP3,SERPINE1,TIMP1	100 (16)
ITGA5	transmembrane receptor	1,11E-02	APOE,ENPP2,MMP2
DAG1	transmembrane receptor	1,76E-02	LAMB1,LAMC1
TLR4	transmembrane receptor	4,82E-02	APP,C3,HSPA5,HTRA1,INHBA,MMP1,TGFB1
IL1R1	transmembrane receptor	2,16E-02	MMP2,TGFB1,TIMP1
ITGB1	transmembrane receptor	1,25E-10	APOE,COL1A1,COL1A2,LAMB1,LAMC1,MMP1,MMP2,SERPINE1,TGFB1,THBS1,TIMP2,VIM	137 (19)
SFRP1	transmembrane receptor	1,13E-05	FN1,MMP1,MMP2,MMP3,VIM	137 (17)
IL10RA	transmembrane receptor	2,56E-07	C3,DCN,ECM1,EFEMP1,ERO1A,FBN1,FN1,FSTL1,HMCN1,HSPA8,INHBA,LUM,PCOLCE,POSTN,SPARC,TGFB1
LTBR	transmembrane receptor	1,50E-02	CLU,ENPP2,MFGE8
F3	transmembrane receptor	6,37E-04	EFEMP1,LAMB1,MMP2,SERPINC1,SERPINE1
AGER	transmembrane receptor	1,01E-04	APP,MMP2,MMP3,SERPINE1,TGFB1,TUBB3	130 (17)
SFRP2	transmembrane receptor	4,25E-02	MMP2
SFRP4	transmembrane receptor	5,98E-03	FN1,VIM
LRPAP1	transmembrane receptor	5,13E-04	APP,MMP2,SERPINE1	126 (20)
LGALS3BP	transmembrane receptor	4,93E-03	FN1,MMP3
PLAUR	transmembrane receptor	6,29E-03	MMP2,MMP3,VIM	127 (20)
CAV1	transmembrane receptor	4,66E-02	HSPA8,MMP1,NPM1,THBS1
IL6R	transmembrane receptor	1,08E-06	A2M,COL1A1,COL1A2,FN1,MMP2,MMP3,TGFB1,TIMP1	102 (19)
HFE	transmembrane receptor	1,76E-02	HSP90B1,HSPA5
ITGA2	transmembrane receptor	6,84E-05	COL1A1,DCN,MMP1,MMP3	114 (19)
ITGB4	transmembrane receptor	4,93E-03	ENPP2,SPARC
ITGA6	transmembrane receptor	1,42E-02	ENPP2,RPSA
FAS	transmembrane receptor	1,44E-11	ANXA2,ARHGDIA,BGN,COL1A1,COL1A2,COL3A1,COL4A2,COL5A1,COL6A1,COL6A3,FBN1,FSCN1,GNAI2,LUM,MMP1,PLEC,PTX3,RDX,SERPINE1,SPTBN1,TAGLN2,TGFB1,TPM4	109 (16)
TNFRSF12A	transmembrane receptor	1,26E-02	MMP1,MMP3
LEPR	transmembrane receptor	1,77E-06	ANXA5,APOE,COL1A1,FN1,HIST1H2AC,IGFBP3,MMP2,MMP3,SERPINE1,TGFB1,TIMP1	105 (18)
ENG	transmembrane receptor	3,68E-03	FN1,SERPINE1,TGFB1	100 (17)
ITGB3	transmembrane receptor	6,75E-12	ACLY,COL1A1,COL1A2,FN1,HSP90B1,MMP1,MMP2,SERPINE1,SPARC,TGFB1,TIMP1,UBA52	131 (16)
LRP1	transmembrane receptor	1,13E-05	APP,C1S,COL3A1,MMP2,SERPINF1	105 (9)
IL17RA	transmembrane receptor	4,14E-02	MMP3,TIMP1
IL11RA	transmembrane receptor	1,42E-02	MMP2,TGFB1
TNFRSF1A	transmembrane receptor	4,44E-02	MMP1,MMP2,SERPINE1,TGFB1
EDNRA	transmembrane receptor	6,84E-09	COL1A1,COL3A1,MMP2,TGFB1,TIMP1,TIMP2
OLR1	transmembrane receptor	8,90E-04	FN1,MMP1,MMP3,TGFB1	102 (18)
CD28	transmembrane receptor	1,76E-05	ANXA1,GAPDH,HIST1H2AC,HNRNPA1,HSPA8,IGFBP6,LTBP1,MMP2,PGAM1,PRDX4,PSMA5,RPS14,THBS1,XRCC6	59 (6)
TLR3	transmembrane receptor	4,71E-02	C3,CLU,MMP1,PTX3,SERPINE1,TIMP1
EIF3I	translation regulator	1,08E-02	SERPINE1
IGF2BP1	translation regulator	1,07E-09	COL1A1,COL1A2,COL5A1,COL6A2,COL6A3,LUM,SERPINH1
ELF3	transcription regulator	3,89E-02	FN1,MMP3
ZNF384	transcription regulator	6,67E-05	COL1A1,MMP1,MMP3
ATF6B	transcription regulator	4,25E-02	HSPA5
WWTR1	transcription regulator	4,06E-03	COL1A1,FN1,SERPINE1	25 (6)
SOX12	transcription regulator	3,20E-02	TUBB3
CREB3L2	transcription regulator	4,93E-03	HSPA5,SEC23A
SPDEF	transcription regulator	3,62E-13	COL1A1,COL4A2,COL5A1,COL5A2,COL6A1,COL6A2,COL6A3,LAMB2,LAMC1,LASP1,SERPINE1,TGFB1,VIM
MKX	transcription regulator	1,13E-03	COL1A1,COL1A2
ZNF24	transcription regulator	4,25E-02	MMP2
NSD1	transcription regulator	9,68E-03	KRT10,KRT2
NAT8	transcription regulator	2,15E-02	APP
PRDM16	transcription regulator	3,11E-03	DCN,SERPINE1
GLIS2	transcription regulator	4,49E-10	C3,COL1A1,LTBP2,SERPINE1,SPARC,TGFB1,VIM	23 (3)
HMGA1	transcription regulator	6,41E-09	COL1A1,COL1A2,COL4A2,FSTL1,IGFBP3,IGFBP4,IGFBP7,KRT10,LAMB1,SERPINH1,SOD3,SPARC,TAGLN	54 (7)
HSF1	transcription regulator	1,03E-11	CCT2,CCT4,CCT6A,CCT7,CCT8,CLU,EFEMP1,FBLN1,HSP90AA1,HSP90AB1,HSPA8,HSPB1,HSPD1,PGK1,SERPINH1,SPTAN1,TCP1	17 (2)
CCND1	transcription regulator	8,69E-03	COL1A1,COL5A2,ENPP2,H2AFJ,HSPA8,MMP2,MMP3,NT5E	124 (12)
STAT3	transcription regulator	1,04E-06	A2M,AHSG,COL1A1,COL1A2,COL3A1,COL5A1,FN1,FSCN1,MMP2,MMP3,NRP1,PDIA4,PSMB5,SERPINE1,SERPINE2,TGFB1,THBS1,TIMP1,VIM	148 (20)
E2F1	transcription regulator	1,10E-08	CCT2,CCT4,CLIC1,HIST1H2AC,HSP90B1,HSPA8,HSPD1,KRT1,KRT10,MDH1,MMP1,MMP3,NRP1,SERPINE1,SLC3A2,SRSF1,TGFB1,THBS1,UGDH,VCP,VIM	93 (12)
SRF	transcription regulator	6,46E-04	A2M,HSPG2,MYH9,NPM1,PPIA,RNH1,SND1,TAGLN,TLN1,TUBB4B,VCL
LPXN	transcription regulator	3,20E-02	TAGLN
TFAP2A	transcription regulator	3,84E-04	ANXA1,APOE,EFEMP1,KRT5,MMP2,PRDX1
HAND2	transcription regulator	1,59E-02	COL1A1,COL1A2,COL3A1
HDAC10	transcription regulator	4,25E-02	MMP2
NFATC4	transcription regulator	3,33E-03	APP,COL1A1,COL3A1
TFEC	transcription regulator	1,58E-02	COL6A3,MYH9
SOX2	transcription regulator	6,74E-03	ALB,COL1A1,EFEMP1,EXT2,INHBA,NRP1,TGFB1,TUBB3,VIM	127 (7)
HOXB8	transcription regulator	3,20E-02	TAGLN
VHL	transcription regulator	6,14E-05	CFL1,CLTC,FN1,HNRNPA2B1,LMNA,SPARC,TAGLN,VIM	65 (11)
HTATIP2	transcription regulator	1,76E-02	MMP2,SPARC
SMAD2	transcription regulator	1,10E-02	BGN,MMP2,SERPINE1,THBS1
GMNN	transcription regulator	1,01E-02	EFEMP1,EXT2,INHBA,NRP1
EPAS1	transcription regulator	3,79E-05	ENO1,FBLN2,FN1,HIST1H2AC,HSPA5,IGFBP3,LDHA,LOX,LOXL2,SERPINE1
USF1	transcription regulator	9,67E-03	IGFBP3,MYH9,SERPINE1,TGFB1
SOX4	transcription regulator	4,59E-02	FN1,IGFBP4,SERPINE2,TUBA1A,VIM
MDM2	transcription regulator	3,07E-02	IGFBP6,TIMP1,TP53I3
JUNB	transcription regulator	1,71E-14	ACLY,C3,CLU,COL1A1,COL1A2,EEF2,FBLN2,FN1,INHBA,MMP1,MMP2,MMP3,MYL12A,SERPINE1,SPTAN1,TIMP1,YWHAG	96 (13)
STAT4	transcription regulator	9,89E-03	C3,ERO1A,FSCN1,HEXB,RCN3,SERPINE1,TIMP1	127 (10)
HLTF	transcription regulator	2,15E-02	SERPINE1
ZIC1	transcription regulator	4,25E-02	APOE
CBFB	transcription regulator	4,59E-02	HTRA1,LGALS3BP,NRP1
NOTCH1	transcription regulator	2,89E-05	COL1A1,COL1A2,IGFBP3,IGFBP4,LOX,MMP1,MMP2,PDIA3,SERPINE1,TAGLN,TGFB1	101 (21)
HOXA10	transcription regulator	2,61E-05	APOE,COL3A1,ENPP2,FN1,HSP90AA1,IGFBP3,LAMA2,MSN,P4HB,YWHAG
TAF4	transcription regulator	5,65E-07	DCN,KRT16,LUM,MMP2,MMP3,OLFML3,TGFB1,THBS1,THBS2
ETV4	transcription regulator	1,89E-05	B4GALT1,FN1,KRT5,PLEC,VIM
POU2F3	transcription regulator	4,25E-02	KRT10
HIF1A	transcription regulator	2,64E-13	ALDOA,APOE,BGN,ENO1,ERO1A,FN1,FSCN1,GAPDH,HIST1H2AC,HSPA5,IGFBP3,LDHA,LOX,LOXL2,MMP1,MMP2,NPM1,NT5E,PGK1,PKM,PPIA,SERPINE1,TGFB1,TPI1,VIM	134 (16)
SIM2	transcription regulator	1,06E-03	MMP2,MMP3,TIMP2
ZNF148	transcription regulator	8,36E-03	FN1,VIM
MYOCD	transcription regulator	1,56E-03	COL1A1,COL1A2,COL3A1,FN1,TAGLN
PURB	transcription regulator	3,20E-02	HTRA1
ID1	transcription regulator	2,05E-02	FN1,MMP2,VIM
CEBPA	transcription regulator	1,38E-07	A2M,ACLY,ALB,ANPEP,ANXA1,C3,COL1A1,COL1A2,GAPDH,HSPA5,IGFBP3,IGFBP4,NRP1,PGD,PTX3,SERPINE1,SERPINF1,THBS1,VCL	134 (18)
DLX1	transcription regulator	4,25E-02	SERPINE1
TCEB1	transcription regulator	2,15E-02	HNRNPA2B1
RUNX1	transcription regulator	1,03E-03	ALB,IGFBP3,KRT1,MYH9,SERPINE1,TIMP1	75 (7)
SP100	transcription regulator	1,76E-02	HSPA8,MMP1
GLI1	transcription regulator	5,63E-05	CLU,COL1A1,EZR,IGFBP6,IGFBP7,LMNA,MMP2,PCOLCE2,PLOD1,VIM	73 (7)
SMAD7	transcription regulator	1,35E-15	BGN,COL1A1,COL1A2,COL3A1,COL6A1,COL6A3,DCN,EFEMP1,FN1,LTBP2,MMP1,MMP2,NID2,SERPINE1,TAGLN,TGFB1,TGFBI,TIMP1	96 (19)
ARID5B	transcription regulator	2,15E-02	TAGLN
NFYB	transcription regulator	2,50E-03	ACLY,ATP5B,COL1A1,COL1A2,GAPDH,H2AFJ,HNRNPA1,PDIA4,VIM	10 (2)
SP1	transcription regulator	6,77E-10	AEBP1,APOE,ATP5B,COL1A1,COL1A2,EZR,FN1,GNAI2,HSPA5,IGFBP3,IGFBP4,KRT16,MMP1,MMP2,PGK1,PKM,PSG5,SERPINE1,SPARC,TAGLN,TGFB1,TIMP1,TIMP2,UGDH,VIM	88 (17)
FOXP3	transcription regulator	2,53E-03	ANXA1,MMP2,NRP1,NT5E,TGFB1
FLI1	transcription regulator	1,58E-06	COL1A1,COL1A2,HSPA8,LOX,MMP1,NPM1,TCP1
SIM1	transcription regulator	5,15E-04	APOE,IGFBP4,KRT5,LAMA2,PFN1,POSTN,SERPINA5,SRSF1,UBA1
HOXD10	transcription regulator	5,50E-04	EZR,RPSA,SERPINE1,TIMP1,TIMP2
GATA4	transcription regulator	1,10E-05	COL1A1,COL1A2,COL3A1,HSPA5,LTBP2,POSTN,TAGLN,TGFBI,TIMP1,VIM
APBB1	transcription regulator	9,68E-03	APP,TAGLN
TWIST1	transcription regulator	5,97E-19	CLU,COL1A1,COL6A1,DCN,EMILIN1,FBN2,FN1,GPC1,IGFBP4,LMNA,MFGE8,MMP1,MMP2,MXRA8,NT5E,OLFML3,PCOLCE,PXDN,TGFB1,TGFBI,THBS2,VIM	103 (7)
BMI1	transcription regulator	1,26E-02	LOX,NID1,VIM
NACA	transcription regulator	4,25E-02	COL1A1
NEUROG1	transcription regulator	1,89E-09	C1S,C3,COL3A1,FN1,INHBA,PAPPA,PXDN,SERPINF1,SPOCK1,THBS1
NOTCH3	transcription regulator	7,43E-06	ACTN1,COL5A1,FN1,PTX3,SPARC,TAGLN
JUN	transcription regulator	2,70E-19	A2M,ANXA1,ANXA2,APOE,APP,CLU,COL1A1,COL1A2,EEF2,EIF4A1,EZR,FLNC,FN1,HNRNPA2B1,IGFBP3,IGFBP4,IGFBP7,KRT16,LMNA,LTBP1,MMP1,MMP2,MMP3,PRDX1,PTX3,PXDN,SERPINE1,SPARC,TGFB1,THBS1,TIMP1,VIM,YWHAG	94 (15)
CREB1	transcription regulator	2,92E-02	APOE,ECM1,FN1,HSPA5,INHBA,MMP1,NRP1,RNH1,SEMA7A,TAGLN2,VIM
XBP1	transcription regulator	2,74E-07	APP,FKBP10,FN1,HSP90B1,HSPA5,PDIA3,PDIA4,PDIA6,PPIB,RCN3,SEC23A,TXNDC5,XRCC6	36 (3)
SREBF1	transcription regulator	4,04E-03	ACLY,COL6A1,FN1,HSPA5,PLS3,SERPINE1,TGFB1	103 (20)
TWIST2	transcription regulator	1,18E-04	FN1,POSTN,TGFB1,VIM	69 (7)
ARNT	transcription regulator	4,45E-06	ALDOA,ENO1,ERO1A,GAPDH,LDHA,PGK1,SERPINE1,TPI1,VIM	98 (7)
CEBPB	transcription regulator	1,16E-08	ALB,C3,COL1A1,COL1A2,COL5A2,DCN,FBLN1,HSP90AA1,HSPA8,HSPD1,IGFBP3,IGFBP4,LAMC1,MMP1,MMP3,NRP1,SERPINE1,TGFB1,TUBB3,VIM	160 (20)
HDAC3	transcription regulator	1,31E-03	COL1A2,ENPP2,SERPINE1,TAGLN,VIM	76 (12)
NKX2-1	transcription regulator	2,79E-03	CLU,ENPP2,IGFBP6,MMP2,QSOX1,SERPINE1,THBS1	43 (4)
FBXW7	transcription regulator	2,39E-03	APP,COL1A1,SERPINE1	116 (13)
POU5F1	transcription regulator	4,28E-02	ALB,EFEMP1,EXT2,INHBA,NRP1,TGFB1,VIM
KLF10	transcription regulator	7,12E-03	SERPINE1,TGFB1
PLAG1	transcription regulator	2,16E-02	FLNC,PLEC,QSOX1
YBX1	transcription regulator	1,11E-07	COL1A1,COL1A2,EFEMP1,IGFBP3,MMP2,MMP3,MVP,TGFB1	73 (10)
TSC22D1	transcription regulator	2,35E-03	FN1,SERPINE1	59 (11)
STAT6	transcription regulator	7,46E-03	APOE,COL1A1,COL1A2,EXT1,LGALS3BP,MMP2,SERPINE1,SERPINF1	148 (19)
PPARGC1B	transcription regulator	1,91E-03	ATP5B,C3,ENO1,ERO1A	10 (2)
JUND	transcription regulator	6,84E-04	CLU,COL6A1,MMP1,MMP3,TIMP1	80 (11)
ETV5	transcription regulator	1,11E-02	FN1,KRT16,MMP2
ETV1	transcription regulator	1,76E-02	MMP1,VIM
CDKN2A	transcription regulator	1,53E-04	A2M,C3,EEF1A1,MMP1,MMP2,MMP3,NPM1,PSMA5,PTX3,SERPINE1,VIM	89 (15)
RBM14	transcription regulator	4,25E-02	HTRA1
HEXIM1	transcription regulator	1,40E-04	ANXA1,COL1A1,LOXL2,VIM	44 (6)
KLF2	transcription regulator	1,44E-04	ECM1,FBLN1,MVP,SERPINE1,TGFB1,THBS1,TIMP1,UGDH
HOXC8	transcription regulator	4,46E-03	APP,SERPINF1,TAGLN
NFIX	transcription regulator	2,32E-02	POSTN,SERPINE1
SUPT16H	transcription regulator	2,39E-03	HIST1H2AC,LOXL2,MSN
GLI2	transcription regulator	2,03E-02	KRT1,KRT10,MMP3,VIM
PPARGC1A	transcription regulator	8,15E-03	ATP5B,C3,COMP,LDHA,MDH2,PGAM1,PRDX3	13 (2)
KLF4	transcription regulator	1,05E-06	ALB,COL1A1,EFEMP1,EXT2,FN1,INHBA,NRP1,SERPINE1,SERPINH1,SOD3,TAGLN,TGFB1,VIM	89 (13)
NCOA3	transcription regulator	6,84E-04	CCDC80,IGFBP3,LDHA,PGK1,TAGLN	121 (7)
PIAS4	transcription regulator	7,12E-03	ALB,SERPINE1	97 (13)
FOXM1	transcription regulator	1,36E-04	ANXA1,LAMA4,LDHA,LOX,MMP2,PGK1,VIM	49 (5)
SKIL	transcription regulator	6,47E-06	COL1A2,HNRNPA1,SERPINE1,THBS2,TLN1,VAT1	13 (3)
HDAC6	transcription regulator	3,07E-06	COL1A1,LTBP2,SERPINE1,TAGLN,TGFBI,VIM	147 (18)
SOX1	transcription regulator	8,04E-03	EFEMP1,EXT2,INHBA,NRP1
ATF6	transcription regulator	9,13E-03	APP,HSP90B1,HSPA5	74 (11)
TGFB1I1	transcription regulator	1,42E-02	FN1,SERPINE1
PML	transcription regulator	2,03E-03	ACTG1,APOE,CFL1,HSPB1,PRDX1,YWHAG
PKNOX1	transcription regulator	1,76E-02	COL5A2,PGK1
NFYC	transcription regulator	7,92E-03	ALB,COL1A1,COL1A2	10 (2)
HOXB5	transcription regulator	4,93E-03	MMP1,MMP2
TP73	transcription regulator	2,62E-09	C3,COL1A1,COL5A2,IGFBP3,IGFBP4,KRT10,LTBP1,MMP2,SERPINA5,SERPINE1,SERPINE2,SERPINF1,TGFB1,THBS1,THBS2,TIMP1,TP53I3,XRCC6,YWHAB	147 (15)
MECP2	transcription regulator	1,64E-06	ANXA1,APOE,DPYSL2,HSPA5,IGFBP3,LMNA,VIM,YWHAB,YWHAZ
ONECUT1	transcription regulator	3,12E-02	APOH,C1S,CCT8,EIF4A1,HNRNPA2B1,MDH1,VCP
NFE2L2	transcription regulator	5,19E-17	ACTG1,ALDOA,CCT7,COL1A1,COL3A1,COL4A2,FN1,GNAI2,HSP90AA1,HSP90AB1,HSP90B1,LMNA,NUCB2,PCBP1,PDIA3,PDIA4,PDIA6,PGD,PPIB,PRDX1,PSMA5,PSMB2,PSMB5,PSMB6,SEC23A,SOD3,TGFB1,TPI1,UGDH,VCP	74 (7)
VDR	transcription regulator	3,81E-02	COL1A1,IGFBP3,SERPINC1,TGFB1
HNF4A	transcription regulator	3,28E-03	ACLY,ACTN1,AHSG,ANPEP,ANXA5,APOE,APOH,C1S,C3,CCT8,ERO1A,FKBP10,GAPDH,HEXA,HSP90B1,HSPA5,INHBA,KPNB1,KRT10,MDH1,MDH2,NUCB1,PKM,PSMA5,PSMB5,RPL12,RPS18,SEC23A,SEMA7A,SERPINA5,SERPINE1,SRSF1,TAGLN2,TLN1,YWHAB	86 (8)
FOXO1	transcription regulator	9,93E-04	A2M,ACLY,ATP5B,HSPA5,MMP1,MMP3,PSMB6,SERPINE1,TGFB1,THBS1,TKT	141 (20)
SP3	transcription regulator	9,80E-11	AEBP1,COL1A1,COL1A2,GNAI2,HSPA5,IGFBP3,KRT16,MMP2,PGK1,PKM,SERPINE1,SERPINH1,SPARC,TAGLN,TIMP1,TIMP2,VIM	47 (4)
ATF3	transcription regulator	9,28E-05	HSPB1,MMP1,MMP2,SERPINE1,SRI,TP53I3	147 (19)
FOXA2	transcription regulator	1,20E-02	A2M,ALB,C3,PKM,SOD3,TAGLN
NFYA	transcription regulator	2,45E-04	ACLY,ALB,COL1A2,HSPA5,PGK1,PKM
TCF20	transcription regulator	3,20E-02	MMP3
CALR	transcription regulator	4,61E-05	COL1A1,COL1A2,FN1,TGFB1,VCL	152 (21)
SMAD4	transcription regulator	1,04E-04	BGN,COL1A2,FSCN1,MMP1,PTX3,SERPINE1,TGFB1,THBS1,TIMP1,VIM	151 (19)
MYOD1	transcription regulator	9,29E-04	ALDOA,ENPP2,FSTL1,MMP2,POSTN,SPTBN1,TGFB1,TKT
TBX5	transcription regulator	7,33E-04	COL1A1,COL1A2,COL3A1,POSTN,VIM
TP63	transcription regulator	2,69E-08	COL5A1,FBN1,FN1,HSPA8,IGFBP3,IGFBP6,IGFBP7,KRT1,KRT10,MFGE8,POSTN,SERPINE1,SERPINF1,TAGLN,TGFB1,THBS1,TP53I3,VIM	129 (16)
CARM1	transcription regulator	4,02E-05	C3,HSP90AA1,IGFBP4,KRT1,MMP3
EZH2	transcription regulator	1,74E-02	ANXA6,C3,EZR,FBLN1,FBN1,IGFBP3,TGFB1
EP300	transcription regulator	5,36E-03	ANXA6,COL1A2,FN1,HSP90AB1,KRT16,LDHA,LGALS3BP,LMNA,MMP1,PSG5,XRCC6	126 (15)
MITF	transcription regulator	1,41E-02	APOE,COL1A1,FN1,MDH1,SERPINE1,SERPINF1,VAT1
RFX1	transcription regulator	7,54E-04	COL1A1,COL1A2,LMNA
NFE2L1	transcription regulator	4,06E-03	PSMB2,PSMB5,PSMB6
ZNF143	transcription regulator	4,93E-03	TALDO1,TCP1
SATB1	transcription regulator	3,36E-02	ACTG1,ACTN1,HSP90AA1,HSPA8,VIM
HNF1A	transcription regulator	3,12E-04	AHSG,ALB,ANPEP,APOH,C1S,COL3A1,GARS,GDI2,HSPA5,PGK1,PSMA5,SERPINE1,SRI,TPI1	42 (2)
MED13	transcription regulator	2,32E-02	ENO1,TKT
ATF4	transcription regulator	6,14E-05	ERO1A,GARS,HSP90B1,HSPA5,NID2,PTX3,SERPINF1,SLC3A2
KEAP1	transcription regulator	2,32E-02	GNAI2,PRDX1
RB1	transcription regulator	2,23E-02	EZR,FN1,KRT10,PTX3,SERPINE1,TGFB1,TUBA1A
HNF1B	transcription regulator	1,87E-12	ACTN1,ALB,BGN,COL5A1,COL5A2,EXT1,FN1,GDI2,IGFBP3,LAMB1,LUM,MMP2,NID2,SERPINH1,SPARC	65 (7)
USF2	transcription regulator	4,14E-05	IGFBP3,LGALS3BP,MYH9,SERPINE1,TGFB1,THBS1	29 (5)
TFAM	transcription regulator	1,23E-03	HK1,PGAM1,PGK1
DNAJB6	transcription regulator	3,97E-03	NPM1,SPARC
KLF6	transcription regulator	4,26E-03	COL1A1,PSG5,SERPINH1,TGFB1
EGR1	transcription regulator	5,35E-04	CLU,COL1A1,COL1A2,FN1,SERPINE1,TGFB1,THBS1,TIMP1	107 (19)
GATA6	transcription regulator	1,96E-02	LDHB,LTBP1,PGK1,TAGLN,TGFB1
MEF2C	transcription regulator	2,53E-03	COL1A1,COL1A2,COL3A1,POSTN,VIM	10 (2)
ERG	transcription regulator	5,23E-03	ACTN1,EXT1,FLNC,MMP1,MMP3,SPARC,THBS1	58 (7)
ING2	transcription regulator	2,15E-02	SERPINE1
SMAD3	transcription regulator	1,73E-09	ALB,BGN,COL1A1,COL1A2,COL3A1,COL6A1,COL6A3,FN1,LUM,MMP1,SERPINE1,TAGLN,TGFB1,THBS1,TIMP1,VIM	115 (18)
MED24	transcription regulator	3,20E-02	HTRA1
DDIT3	transcription regulator	1,86E-02	ERO1A,HSPA5,HSPD1
HOXD3	transcription regulator	1,07E-09	COL1A1,IGFBP3,MMP2,SERPINE1,TAGLN,TGFBI,THBS1
SMARCB1	transcription regulator	4,39E-04	A2M,ACTR2,COL1A1,COL1A2,COL5A2,MMP1,POSTN,SPARC
ARNT2	transcription regulator	8,53E-05	APOE,IGFBP4,KRT5,LAMA2,PFN1,PGK1,POSTN,SERPINA5,SRSF1,UBA1
ETS1	transcription regulator	4,34E-04	ANPEP,COL1A2,EEF1D,FN1,HSPA8,MMP1,MMP2,MMP3,SERPINE1	149 (16)
TBP	transcription regulator	3,45E-02	COL1A1,FN1,GAPDH
YAP1	transcription regulator	3,32E-02	FN1,TAGLN,VIM
Yap1	transcription regulator	3,20E-02	TAGLN
CEBPD	transcription regulator	1,70E-02	ALB,C3,CLU,MMP3
MECOM	transcription regulator	2,13E-02	DCN,SERPINE1
FOSL2	transcription regulator	1,64E-04	COL1A2,MMP1,MMP2,MMP3,TIMP1	76 (10)
MYB	transcription regulator	4,22E-07	ANPEP,COL1A2,FN1,HSPA5,HSPA8,IGFBP3,MMP1,MMP3,VIM	88 (11)
SHOX2	transcription regulator	4,25E-02	HTRA1
SIN3B	transcription regulator	2,13E-02	COL1A2,LDHA
SOX3	transcription regulator	1,01E-02	EFEMP1,EXT2,INHBA,NRP1
ETS2	transcription regulator	2,94E-02	ANPEP,MMP1,MMP3
TRIM24	transcription regulator	4,04E-03	FBN1,LGALS3BP,PLEC,SERPINE1,TGFBI
ZBTB7B	transcription regulator	4,88E-03	COL1A1,COL1A2,NRP1
TAF4B	transcription regulator	1,64E-04	FN1,INHBA,MMP3,TGFB1
PLAGL2	transcription regulator	4,25E-02	LDHA
SP2	transcription regulator	5,13E-04	GNAI2,SERPINE1,SERPINH1
HTT	transcription regulator	1,87E-16	ALDOA,APP,ATP5B,BMP1,COL4A2,COL6A1,COL6A3,DCN,EEF1A1,EEF2,ENPP2,FN1,GAPDH,GPC1,HSP90AB1,HSPA5,HSPA8,HSPD1,KRT1,LDHA,LDHB,LOX,LTBP2,MAN1A1,MDH2,MMP2,MMP3,PFN1,PLOD3,PSMA5,SERPINF1,SERPINH1,SPTAN1,TAGLN,TGFBI,THBS2,TPI1,YWHAG	127 (7)
MYCN	transcription regulator	6,31E-28	ACTG1,ACTN4,ALDOA,ARPC1B,CLU,COL1A1,COL5A2,EEF1A1,EEF1D,EEF1G,EEF2,EIF4A1,FBN1,FN1,GAPDH,HSP90AB1,HSPD1,IGFBP7,INHBA,LDHA,MMP2,MYH9,MYL12A,NPM1,NUCB1,PDIA4,PSMB6,RPL12,SERPINE1,SPARC,TAGLN,TIMP2,TPI1,VIM
YY1	transcription regulator	1,88E-02	CLU,COL1A1,HSPA5,MMP2,SRSF1,TAGLN,TGFBI
NFATC2	transcription regulator	1,96E-02	ENPP2,INHBA,LDHA,SLC3A2,TGFB1
GTF2I	transcription regulator	4,13E-04	HSPA5,PDIA4,THBS1
DACH1	transcription regulator	5,26E-05	EFEMP1,IGFBP3,MMP3,SERPINE1,TGFB1	119 (11)
NFKB1	transcription regulator	5,27E-05	A2M,APOE,APP,COL1A1,COL1A2,ENPP2,FSCN1,IGFBP3,MMP3,PTX3,TGFB1	144 (17)
RELA	transcription regulator	4,94E-05	A2M,ACTN4,APOE,APP,C3,COL1A1,COL1A2,FSCN1,LUM,MMP1,PTX3,SERPINE2,TGFB1,VIM	136 (15)
FOSB	transcription regulator	3,02E-05	INHBA,MMP1,MMP2,SERPINE1,TIMP1	46 (7)
RUNX2	transcription regulator	2,50E-07	COL1A1,COL1A2,FN1,HTRA1,LUM,MMP2,SERPINE1,TAGLN,TIMP1,TLN1	114 (15)
FOS	transcription regulator	5,73E-16	A2M,ACTG1,B4GALT1,CALU,CLU,COL1A1,COL6A1,ENO1,EZR,FBN1,FN1,FSTL1,HSP90B1,HSPA5,LGALS3BP,LOX,LTBP1,LTBP2,MMP1,MMP2,MMP3,MYH9,PFN1,PRDX1,RNH1,RPS18,SERPINE1,SERPINE2,TGFB1,TGFBI,TIMP1,VIM,YWHAZ	103 (16)
FOSL1	transcription regulator	1,09E-04	MMP1,MMP2,MMP3,SERPINE1,SERPINE2,SPARC	70 (9)
HES6	transcription regulator	3,20E-02	MMP1
CBL	transcription regulator	9,77E-03	COL1A1,FN1,MMP2	103 (20)
PAX3	transcription regulator	1,35E-03	ANXA1,APP,CLU,COL1A2,CST3,HSPG2,PPIB,PXDN
BRCA1	transcription regulator	1,68E-03	ENPP2,EZR,HSPB1,KRT5,SERPINE2,TP53I3,XRCC6
PBX1	transcription regulator	2,21E-04	COL1A1,COL5A2,DCN,VCP
SNAI1	transcription regulator	7,27E-08	ACTN1,ACTR2,CFL1,COL1A1,FLNC,FN1,LASP1,SPARC,TGFB1,TPM4
NFIC	transcription regulator	2,95E-02	ALDOA,HTRA1
BATF3	transcription regulator	4,25E-02	MMP1
MAFB	transcription regulator	7,31E-04	ACTN1,ARHGDIA,SPOCK1,TAGLN
CITED2	transcription regulator	2,74E-02	MMP1,PGK1
FOXA1	transcription regulator	1,43E-02	ANXA1,FSTL1,HK1,KRT16,TAGLN
ELK3	transcription regulator	1,92E-04	CCT8,MMP3,SERPINE1
HSF2	transcription regulator	7,81E-10	CCT2,CCT4,CCT6A,CCT7,CCT8,CLU,HSPB1,TCP1
EHF	transcription regulator	1,65E-03	ANPEP,MMP1,MMP3,SERPINE1,TIMP1
SIX4	transcription regulator	4,25E-02	ALDOA
SMARCD1	transcription regulator	1,08E-02	MMP1
DAXX	transcription regulator	7,54E-04	HSPB1,MMP1,SERPINE1	66 (7)
SMARCA4	transcription regulator	3,25E-11	A2M,ACTN4,ALB,FN1,GAPDH,HEXB,IGFBP4,IGFBP7,INHBA,LMNA,LOX,LOXL2,LUM,MFGE8,MMP1,MMP2,NRP1,PSG4,PSG5,PTX3,SEMA7A,SERPINE1,SERPINE2,SERPINH1,SOD3,SRPX,TAGLN,TIMP2	143 (12)
NAB2	transcription regulator	8,97E-04	FN1,MMP3,TGFB1	54 (6)
RFX2	transcription regulator	3,97E-03	COL1A2,LMNA
NFKBIA	transcription regulator	9,70E-18	A2M,AEBP1,C3,CLU,COL1A2,COL3A1,COL5A2,DCN,ENPP2,ERO1A,FN1,FSCN1,HSPA5,HSPA8,IGFBP6,MFGE8,MMP1,MMP3,NID1,PTX3,RPS18,RPSA,SERPINE2,SOD3,SPOCK1,SPTBN1,TGFB1,TIMP1,TIMP2,UBA1,XRCC6,YWHAZ	141 (18)
TFAP2C	transcription regulator	2,70E-02	HK1,NRP1,THBS1
ELK1	transcription regulator	1,50E-02	CCT8,TAGLN,THBS1
MTPN	transcription regulator	8,08E-11	AHSG,ANXA1,COL1A1,COL1A2,FBLN1,FN1,MMP3,SERPINE1,SPARC,TAGLN,TGFB1,TUBA1A	74 (7)
CREB3L1	transcription regulator	3,59E-05	COL1A1,COL1A2,HSP90B1,HSPA5
CTNNB1	transcription regulator	9,02E-12	ACTN4,ANXA1,ARHGDIA,BGN,BMP1,CLU,COL1A1,COL4A2,ECM1,ENPP2,FBLN2,FN1,HTRA1,KRT1,KRT5,LAMB1,LMNA,MFGE8,MMP1,MMP2,MMP3,PFN1,PLS3,RCN1,SERPINA5,SERPINE1,SERPINE2,SRSF1,TIMP1,UBA1,VIM	96 (16)
ALYREF	transcription regulator	1,08E-02	APOE
CUX1	transcription regulator	1,95E-02	MMP2,THBS1,VIM
SF1	transcription regulator	1,69E-03	COL1A1,FN1
RBM39	transcription regulator	1,08E-02	HTRA1
RFX5	transcription regulator	1,11E-02	COL1A1,COL1A2
SRSF2	transcription regulator	1,64E-04	APP,COL1A1,SRSF1,VIM
TFE3	transcription regulator	2,13E-02	MYH9,SERPINE1
SMAD6	transcription regulator	1,26E-02	SERPINE1,TGFB1
NOC2L	transcription regulator	3,20E-02	TP53I3
TP53	transcription regulator	3,66E-35	A2M,ACLY,ACTN1,ACTN4,ALB,ANXA1,ANXA2,ANXA6,APOE,APP,ARPC1B,BMP1,CALU,CCDC80,CLU,COL1A1,COL1A2,COL3A1,COL4A2,COL5A2,COL6A2,EMILIN1,ENPP2,EZR,FBLN2,FN1,FSTL1,GAPDH,HNRNPA2B1,HSP90AA1,HSP90AB1,HSPA8,HSPB1,HSPD1,HSPG2,IGFBP3,IGFBP4,IGFBP7,INHBA,KPNB1,LAMB2,LASP1,LDHA,LOX,LTBP1,MDH2,MMP1,MMP2,MMP3,MVP,MYH9,NID2,NPM1,NRP1,P4HB,PDIA6,PFN1,POSTN,PRDX2,PRDX3,RPSA,SERPINC1,SERPINE1,SERPINE2,SERPINH1,TAGLN2…	169 (18)
WT1	transcription regulator	2,14E-07	ANPEP,CLIC1,EXT2,EZR,HSP90B1,HSPG2,MMP2,MMP3,NUCB1,PDIA4,PPIB,SERPINE1,TGFB1,THBS1	100 (13)
PDX1	transcription regulator	1,14E-04	ACTG1,ALB,ANXA2,COL1A1,COL3A1,HK1,IGFBP3,MAN1A1,MDH1
JMY	transcription regulator	2,15E-02	HTRA1
HOXA7	transcription regulator	3,89E-02	KRT10,VIM
ACTN4	transcription regulator	1,13E-03	MMP1,MMP3
MED4	transcription regulator	1,08E-02	HTRA1
MYC	transcription regulator	2,92E-37	ACTN1,ACTN4,ALB,ALDOA,ANXA5,ANXA6,APP,CLU,COL1A1,COL1A2,COL3A1,COL4A2,COL5A1,COL5A2,COL6A3,ECM1,EEF2,EFEMP1,EIF4A1,ENO1,EXT2,FBLN2,FBN1,FBN2,FN1,FSTL1,GAPDH,GDI2,GPC1,HNRNPA1,HNRNPA2B1,HSP90AA1,HSPB1,HSPD1,INHBA,LAMB2,LDHA,LDHB,LOX,LUM,MSN,NPM1,NRP1,NUCB1,PGAM1,PGK1,PKM,PLS3,PPIA,PRDX2,PRDX3,PRDX4,RPS18,SERPINE1,SERPINE2,SERPINH1,SLC3A2,SPARC,SRSF1,TAGLN2,TGFB1,THBS1,THBS2,TIMP1,TIMP2,TKT,TLN1,TP…	161 (18)
ID4	transcription regulator	5,98E-03	MMP2,VIM
MEF2D	transcription regulator	4,06E-03	COL1A2,COL3A1,TGFB1	11 (2)
PTPN23	phosphatase	3,20E-02	VIM
PTEN	phosphatase	2,36E-05	ANXA1,ARHGDIA,C3,HEXB,IGFBP3,IGFBP6,MDH1,MMP2,MMP3,PGK1,PLEC,PLOD1,SEC23A,SERPINE1,TGFB1,THBS1	130 (16)
PTP4A3	phosphatase	7,54E-04	FN1,HSP90AA1,PCBP1
PPP2R4	phosphatase	1,08E-02	VCP
SYNJ1	phosphatase	1,08E-02	APP
PPP1R13B	phosphatase	3,20E-02	TP53I3
NT5E	phosphatase	5,56E-07	COL1A1,COL3A1,SERPINE1,TGFB1,TIMP1
PPP1R1A	phosphatase	3,20E-02	HSPA5
PLPP3	phosphatase	2,15E-02	FN1
PPP1R3A	phosphatase	1,08E-02	THBS1
PTP4A2	phosphatase	4,25E-02	VCL
PPP3CA	phosphatase	5,95E-03	APP,C3,FN1,VIM	132 (13)
DUSP2	phosphatase	2,15E-02	MMP1
PPP2R5B	phosphatase	4,25E-02	SERPINE2
Ren2	peptidase	6,26E-04	COL3A1,GNAI2,TIMP1
ECE2	peptidase	1,08E-02	APP
ZMPSTE24	peptidase	1,94E-02	IGFBP3,LMNA
GSAP	peptidase	1,08E-02	APP
HM13	peptidase	1,08E-02	APP
USP22	peptidase	4,25E-02	MVP
SHH	peptidase	3,98E-02	FN1,GPC1,LASP1,SERPINE1,TUBB3
CASP1	peptidase	4,65E-02	COL1A1,VIM
CTSD	peptidase	3,20E-02	EEF2
CFB	peptidase	1,26E-02	C3,HSPA5
ADAM10	peptidase	1,30E-02	APP,INHBA,PDIA3,TGFB1
ADAM17	peptidase	7,31E-04	COL3A1,FN1,KRT1,MMP2	100 (17)
MMP9	peptidase	4,14E-05	MMP2,MMP3,SERPINE2,TGFB1,TIMP1,VIM	103 (16)
CFI	peptidase	1,08E-02	C3
PROC	peptidase	1,51E-03	CLU,MMP2,SERPINE1,THBS1	93 (14)
PRSS2	peptidase	2,15E-02	MMP3
RCE1	peptidase	4,38E-13	ACTN4,AEBP1,ATP5B,FBN1,FSTL1,GDI2,LMNA,PAPPA,RCN1,TGFBI,THBS2
ECE1	peptidase	2,15E-02	APP
IDE	peptidase	2,15E-02	APP
PLAU	peptidase	6,84E-04	FN1,HSPA5,MMP1,SERPINE1,VIM	131 (18)
PSMB1	peptidase	3,20E-02	PSMB5
MMP13	peptidase	1,69E-03	COL1A1,TGFB1	143 (21)
USP2	peptidase	4,25E-02	SERPINE1
PSEN1	peptidase	2,88E-20	ACTG1,ALB,ALDOA,APOE,APP,ATP5B,C1S,C3,CFL1,CLTC,DPYSL2,EEF1G,ENO1,ENPP2,GAPDH,GDI2,H2AFJ,HK1,HSP90AA1,HSPA5,HSPA8,HSPD1,PGAM1,PGK1,PKM,PPIA,SPTAN1,TGFB1,TPI1,TUBA1A,TUBB3,TUBB4B,YWHAZ	115 (6)
TLL1	peptidase	1,08E-02	IGFBP3
CTSB	peptidase	1,94E-02	APP,COL1A1
C3	peptidase	2,59E-02	APP,C3,TGFB1
BMP1	peptidase	3,45E-04	DCN,IGFBP3
MMP2	peptidase	6,81E-03	FN1,MMP1,TGFB1	136 (21)
BACE2	peptidase	1,08E-02	APP
F7	peptidase	4,65E-02	EEF1A1,EEF2
DPP4	peptidase	1,18E-04	MMP2,TGFB1,TIMP1,TIMP2	123 (21)
MMP7	peptidase	4,93E-03	MMP2,MMP3	145 (21)
HTRA1	peptidase	2,42E-05	HTRA1,MMP1,MMP3
KLK6	peptidase	4,25E-02	APP
ACE	peptidase	5,98E-03	LDHA,SERPINE1	59 (7)
F2	peptidase	3,44E-11	B4GALT1,CLIC1,CLU,COL1A1,EIF4A1,FN1,HSP90AA1,IGFBP4,LOXL2,MMP1,MYH9,PDIA4,RNH1,SERPINC1,SERPINE1,TAGLN2,THBS1,TIMP2,TUBB3	107 (17)
ADAMTS12	peptidase	3,18E-02	MMP3,TAGLN
CMA1	peptidase	6,85E-04	COL1A1,COL3A1	92 (11)
ATXN3	peptidase	3,11E-03	APP,MMP2
MME	peptidase	4,25E-02	APP
PLG	peptidase	1,09E-03	APOH,COL1A1,MFGE8,MMP1,SERPINE1	140 (24)
CFD	peptidase	1,08E-02	C3
PLAT	peptidase	2,57E-08	FN1,INHBA,MMP1,MMP2,MMP3,SERPINE1,TGFB1	107 (17)
ELANE	peptidase	4,39E-02	HSPA5,MMP2
PSMB5	peptidase	3,20E-02	PSMB2
MMP1	peptidase	7,54E-04	FN1,MMP1,TAGLN	117 (21)
ST14	peptidase	1,69E-03	MMP1,MMP3	79 (12)
ACE2	peptidase	7,12E-03	FN1,SERPINE1	45 (7)
ADAMTS5	peptidase	2,15E-02	BGN
ANPEP	peptidase	2,35E-03	ANPEP,TGFB1
AEBP1	peptidase	4,93E-03	APOE,COL1A2	76 (9)
SMTNL1	other	3,33E-03	FLNC,GAPDH,HSP90AB1
ABLIM2	other	1,08E-02	TAGLN
Cd33	other	2,15E-02	APP
RETNLB	other	1,81E-06	BMP1,COL1A1,COL1A2,FN1,MMP2,MSN,TGFB1,TIMP1	143 (19)
FEZF1	other	6,85E-04	MMP1,TIMP1	54 (7)
SFTPA2	other	2,15E-02	HSPA5
FMOD	other	2,15E-02	LUM
TMBIM1	other	3,20E-02	MMP2
KDM8	other	1,41E-04	ENO1,LDHA,PKM	97 (8)
VIPAS39	other	1,69E-03	SPARC,THBS1
PDLIM2	other	3,22E-03	ENPP2,FSTL1,IGFBP3,LGALS3BP,TAGLN
ZNF76	other	2,15E-02	TCP1
DNAJA4	other	1,08E-02	APOE
OLFM2	other	4,25E-02	TAGLN
RER1	other	1,08E-02	APP
ZNF652	other	2,35E-03	TGFB1,VIM
ABLIM3	other	1,08E-02	TAGLN
USE1	other	4,25E-02	HSPA5
RBM17	other	2,15E-02	FN1
GLIPR2	other	4,25E-02	VIM
RTN3	other	2,15E-02	APP
MYOC	other	4,66E-07	ANXA1,FBN1,FN1,FSCN1,HSPA5,LAMA2,LAMB1,LAMC1,PXDN
ZNF451	other	3,20E-02	SERPINE1
BTBD7	other	2,15E-02	MMP2
DERL1	other	2,15E-02	MMP2
ABRA	other	2,15E-02	TAGLN
MDC1	other	2,15E-02	CLU
RRP1B	other	4,60E-03	HSP90AA1,HSP90AB1,RPS14,SERPINE2,TGFB1
SNED1	other	2,35E-03	GAPDH,IGFBP3
L3MBTL1	other	2,15E-02	MMP3
RTN2	other	1,08E-02	APP
RICTOR	other	7,97E-03	ATP5B,PSMA5,PSMB2,PSMB5,PSMB6,RPL12,RPS18,RPSA
VGLL3	other	6,11E-06	COL1A1,COL1A2,MMP3,THBS1
ASPN	other	4,25E-02	TGFB1
CDC73	other	1,94E-02	APP,IGFBP4
MED28	other	2,35E-03	AEBP1,TAGLN
LRRC32	other	3,20E-02	TGFB1
PHF2	other	1,08E-02	HTRA1
KDM6B	other	1,64E-03	FN1,PPIA,VIM
FKRP	other	2,15E-02	LAMC1
TINCR	other	3,11E-03	KRT1,KRT10
S100A14	other	1,08E-02	MMP2
Tcp4	other	1,08E-02	HTRA1
PACS2	other	2,15E-02	HSPA5
KIAA1524	other	5,50E-04	DCN,LASP1,LUM,PSG4,SERPINE2
S100A10	other	3,11E-03	ANXA2,MMP1
TRAM2	other	2,15E-02	COL1A1
PECAM1	other	1,42E-02	MMP2,THBS1
RBM5	other	1,39E-03	ANXA1,HSP90AA1,SERPINH1,UBA1
LGI1	other	1,13E-03	MMP1,MMP3	54 (7)
SLC9A3R1	other	1,11E-02	EZR,MSN
GAB2	other	4,88E-03	APP,SERPINE1,SPARC	40 (4)
PLP1	other	3,31E-04	ENPP2,HSPA5,MMP3,TIMP1	87 (10)
VWF	other	3,20E-02	YWHAZ
Ins1	other	1,64E-09	ALB,COL1A1,GAPDH,GDI2,IGFBP3,IGFBP4,LDHA,LDHB,LGALS3BP,MMP1,MMP2,MMP3,PPIB,RPS14,SERPINE1,SPARC,TIMP1,TIMP2,VIM	107 (18)
PRCC	other	1,08E-02	SERPINE1
DYNLRB1	other	1,08E-02	SERPINE1
COL9A1	other	2,59E-07	COMP,FN1,HSPG2,MFGE8,TGFBI
SPON1	other	1,08E-02	APP
BAK1	other	3,89E-02	ERO1A,PDIA6
DEF6	other	6,26E-04	FN1,MMP2,VIM	65 (7)
MED25	other	1,08E-02	MMP1
MIA	other	3,11E-03	FN1,SPARC
KLC1	other	1,08E-02	APP
NREP	other	1,64E-05	COL3A1,MMP2,TAGLN,TGFB1	66 (7)
L1CAM	other	3,11E-03	ARHGDIA,MMP2
IBSP	other	1,16E-04	MMP2,THBS1
COL2A1	other	1,26E-02	COL1A1,COL3A1
ZNF224	other	2,15E-02	ALDOA
ARHGDIG	other	1,58E-02	ANXA1,COL5A2
CLDN1	other	1,13E-03	MMP2,VIM
SEL1L	other	1,21E-05	HSPA5,TIMP1,TIMP2,TUBB3
CD82	other	2,35E-03	DCN,TIMP1
EZR	other	1,94E-02	HNRNPA2B1,MMP2
PKIA	other	4,25E-02	FN1
COL18A1	other	5,13E-07	FN1,LDHA,MMP1,MMP2,NRP1,SERPINE1,SPOCK1,THBS1,TUBA1A	148 (20)
TPM3	other	3,97E-03	MMP1,MMP2	66 (7)
Cd24a	other	4,25E-02	MMP2
Nppb	other	4,25E-02	COL1A1
NPPB	other	2,90E-04	COL1A1,COL3A1,FN1,TGFB1	168 (20)
MAPT	other	4,11E-26	ACTG1,ALB,ALDOA,APP,ATP5B,C1S,C3,CFL1,CLTC,DPYSL2,EEF1G,ENO1,GAPDH,GDI2,H2AFJ,HK1,HSP90AA1,HSPA5,HSPA8,HSPD1,MDH1,PGAM1,PGK1,PKM,PPIA,PRDX3,SEPT11,SPTAN1,TPI1,TUBA1A,TUBB3,TUBB4B,YWHAZ	117 (6)
RASSF1	other	2,62E-04	APOE,CLU,COL4A2,EFEMP1,IGFBP3,SRPX
FBXL20	other	1,08E-02	APP
SLPI	other	1,87E-03	IGFBP3,LOX,TGFB1
TRD	other	3,20E-02	NT5E
ELAVL1	other	4,75E-02	DCN,PCOLCE,RPS14
LGALS1	other	1,77E-03	FN1,MMP2,PTX3,SERPINE1	132 (19)
FBLN2	other	6,85E-04	FBLN1,MMP2
LAMA3	other	2,15E-02	MMP1
DAB2IP	other	2,15E-02	CLU
RTN1	other	1,08E-02	APP
FERMT2	other	2,15E-02	FN1
ADCYAP1	other	4,43E-08	ACTN1,CFL1,COL3A1,COL5A1,COL5A2,ENPP2,HK1,LUM,MAN1A1,POSTN,RPSA,SERPINE2,SERPINF1,SPARC,TGFBI	105 (6)
BGN	other	2,74E-02	FBN1,SERPINE1
NID1	other	2,15E-02	NID2
H2AFY	other	7,92E-03	FN1,SERPINE1,SPARC
LTBP1	other	2,32E-02	SERPINE1,TGFB1
PSG1	other	2,15E-02	TGFB1
BAZ1A	other	2,15E-02	IGFBP3
S100A9	other	4,46E-03	C3,MMP1,MMP3	111 (16)
RTN4	other	1,38E-06	APP,ARHGDIA,CFL1,DPYSL2,YWHAB,YWHAG,YWHAQ
APAF1	other	6,85E-04	HSPA5,VIM
KRT14	other	5,26E-05	HSPA5,KRT1,KRT16,KRT5,MMP1
FBN1	other	5,91E-17	COL1A2,COL3A1,COL4A2,COL6A3,FBN1,INHBA,LTBP1,MMP1,MMP2,MMP3,SERPINE1	140 (14)
ADIPOQ	other	1,12E-04	ACLY,COL3A1,FN1,MMP1,MMP3,PRDX3,TGFB1,TIMP1	93 (16)
ANXA2	other	2,90E-04	IGFBP3,MMP1,MMP2,TP53I3	102 (15)
IGFBP5	other	1,76E-02	COL1A1,SERPINE1
CLDN7	other	2,20E-03	APOE,C1S,C3,IGFBP7,MMP2,TIMP2
TIAM1	other	4,25E-02	TIMP1
UPF2	other	4,14E-02	CLU,NRP1
BNIP3L	other	2,16E-02	CST3,TGFB1,TIMP2
RLN2	other	8,75E-06	MMP1,MMP2,MMP3,TIMP1	91 (13)
CHADL	other	3,89E-02	IGFBP3,PTX3
APP	other	2,51E-28	ACTG1,ALB,ALDOA,APOE,APP,ATP5B,C1S,C3,CFL1,CLIC1,CLTC,CLU,DCN,DPYSL2,EEF1G,ENO1,ENPP2,EXT1,FN1,GAPDH,GDI2,GPC1,H2AFJ,HK1,HNRNPA1,HSP90AA1,HSP90AB1,HSPA5,HSPA8,HSPB1,HSPD1,HSPG2,INHBA,KPNB1,LDHA,LDHB,MMP1,MMP2,MMP3,NRP1,PGAM1,PGK1,PKM,PPIA,PRDX2,SERPINE1,SERPINF1,SPTAN1,TAGLN,TGFB1,TPI1,TUBA1A,TUBB3,TUBB4B,YWHAB,YWHAZ	157 (18)
CR1L	other	5,66E-18	BGN,C3,COL1A1,COL1A2,COL3A1,COL4A2,COL5A1,COL6A1,COL6A3,FBN1,LUM,SERPINE1,TGFB1	107 (15)
FALEC	other	1,08E-02	ECM1
SRSF1	other	1,91E-04	COL1A1,FN1,SRSF1,VIM
LGALS7/LGALS7B	other	2,35E-03	COL1A2,SERPINE1
ITGA1	other	2,12E-03	DCN,MMP2,MMP3	61 (6)
CDH1	other	6,60E-03	IGFBP3,MMP1,MMP3,VIM	95 (16)
MYH10	other	1,08E-02	MYH9
IGFBP1	other	5,98E-03	IGFBP3,TGFB1	112 (9)
SERPINF1	other	2,93E-03	LOXL2,TGFB1,THBS1,VIM	72 (7)
COL4A3	other	4,06E-16	COL1A1,COL1A2,COL3A1,COL4A2,FN1,LAMB1,LAMC1,MMP2,TGFB1,TIMP1,TIMP2	140 (21)
ITM2B	other	2,15E-02	APP
COL7A1	other	2,15E-02	THBS1
ARRB2	other	3,41E-02	MMP2,SERPINE1
INS	other	1,12E-02	ACLY,HSPA5,IGFBP3,IGFBP4,TGFB1
MYD88	other	4,68E-03	C3,HSP90AB1,HSPA5,INHBA,MMP2,SERPINE1,TGFB1,TIMP1	140 (19)
DES	other	1,69E-03	DCN,TGFB1
AVP	other	1,11E-02	COL3A1,HSPA5,TGFB1
PFN1	other	3,20E-02	ANXA2
ZNF410	other	2,15E-02	MMP1
DCX	other	1,22E-05	ACTN1,ACTN4,TUBB3
GADD45B	other	9,68E-03	BGN,TGFB1	52 (7)
CDH4	other	1,13E-03	MMP1,MMP2
IGFBP2	other	5,84E-07	EFEMP1,FN1,IGFBP3,IGFBP4,MMP2,POSTN,THBS2	121 (14)
S100A4	other	1,29E-06	FN1,MMP2,THBS1,TIMP1,TIMP2,VIM	110 (16)
SFTPD	other	8,29E-05	MMP1,MMP2,MMP3,TGFB1	153 (19)
IGFBP4	other	2,35E-03	IGFBP3,IGFBP6
PTH	other	4,20E-05	COL1A1,COL1A2,FN1,IGFBP3,LMNA,MMP1,MMP2,POSTN,TGFB1	100 (20)
TERC	other	4,92E-02	CLU,TGFB1
STRAP	other	3,20E-02	SERPINE1
TUBB3	other	1,08E-02	ANXA5
CTNNA1	other	1,08E-02	VCL
SNCA	other	5,99E-11	CFL1,EZR,HSP90B1,HSPA5,LDHB,MDH2,MMP1,MMP3,SERPINE1,TPI1,TUBB3,YWHAG	151 (18)
DST	other	2,15E-02	HSPA5
GIPC1	other	4,25E-02	SERPINE1
S100A1	other	3,20E-02	TUBA1A
HNRNPA2B1	other	1,59E-04	FN1,FSCN1,HNRNPA2B1,PAPPA,PKM,SRI,SRPX,SRSF1
RTN4R	other	2,15E-02	APP
ITGB6	other	2,77E-10	COL1A1,COL1A2,COL3A1,MMP2,MMP3,SERPINE1,TGFB1	131 (19)
FSCN1	other	1,08E-02	MMP2
CST5	other	1,08E-02	ANXA5
COL4A1	other	4,25E-02	TGFB1
CTNNAL1	other	4,25E-02	FN1
COL6A1	other	9,68E-03	ALDOA,TPI1
TIMP3	other	2,54E-04	APP,MMP2,VIM	140 (16)
SPARC	other	2,43E-05	COL1A1,COL1A2,FN1,MMP2,SERPINE1,SPARC,TGFB1,VIM	116 (23)
LSM1	other	4,25E-02	NPM1
ARRB1	other	3,18E-02	MMP3,SERPINE1
GNRH1	other	2,37E-02	APP,INHBA,RPSA
LAMC2	other	2,15E-02	MMP2
LAMC1	other	9,68E-03	FN1,VIM	103 (7)
Ank2	other	3,20E-02	SPTBN1
ANK2	other	1,08E-02	SPTBN1
KRT5	other	3,20E-02	SERPINF1
TNC	other	4,46E-03	HTRA1,MMP1,MMP2	139 (19)
BIRC5	other	1,45E-11	BGN,COL1A1,COL3A1,COL5A2,FBLN1,FBN1,FN1,LAMA4,LUM,MMP2,VIM
CLU	other	1,87E-03	APP,CLU,HSPA5
IFRD1	other	4,06E-03	HK1,LAMA2,PPIA
ITGA3	other	6,15E-08	FN1,MMP2,SERPINE1,TLN1,VCL	100 (18)
KNG1	other	3,31E-04	APP,COL1A1,COL1A2,TGFB1	129 (15)
BBC3	other	4,25E-02	PRDX1
SPOCK1	other	1,08E-02	MMP2
THBS1	other	1,13E-05	FN1,MMP2,TGFB1,THBS1,TIMP1	89 (15)
SCUBE3	other	1,60E-06	MMP2,SERPINE1,TGFB1,VIM	56 (7)
NBEAL2	other	4,25E-02	THBS1
S100A2	other	3,20E-02	KRT10
SSRP1	other	2,60E-05	HIST1H2AC,LOXL2,MSN,TAGLN,TP53I3
POSTN	other	1,64E-03	LOX,TGFB1,VIM	40 (5)
LMNB1	other	4,38E-13	ACTN4,AEBP1,ATP5B,FBN1,FSTL1,GDI2,LMNA,PAPPA,RCN1,TGFBI,THBS2
PRNP	other	3,05E-07	APOE,APP,HSP90B1,HSPA5,HSPA8,HSPB1,PDIA3	127 (11)
THY1	other	2,82E-05	CLU,MMP2,TGFB1,VIM	135 (17)
LAMA2	other	8,36E-03	LAMA2,LAMA4
SYNPO	other	1,08E-02	ACTN4
LGALS3	other	3,18E-04	COL3A1,COL5A2,ENPP2,FN1,FSCN1,TGFB1	136 (17)
ABLIM1	other	1,08E-02	TAGLN
SERPINB7	other	4,25E-02	TGFB1
SCX	other	6,84E-05	COL1A1,COMP,MMP3,POSTN
DSPP	other	1,13E-03	BGN,DCN
CCNA1	other	4,25E-02	MMP2
MCAM	other	9,93E-05	FN1,MMP2,VIM	54 (7)
YWHAE	other	1,08E-02	MMP1
BIN1	other	2,15E-02	APP
ITGB8	other	3,20E-02	TGFB1
CUL4B	other	5,93E-04	IGFBP3,PRDX3,TGFB1,TPI1
NECAB3	other	1,08E-02	APP
COL1A2	other	1,16E-04	COL1A2,TGFB1
SPINT2	other	7,12E-03	PAPPA,TGFB1
GFAP	other	5,98E-03	PLEC,VIM
VTN	other	1,60E-05	COL1A1,COL1A2,MMP1,MMP2,SERPINE1	131 (21)
FBLN5	other	3,11E-03	MMP2,TGFB1	69 (10)
CGA	other	4,39E-02	MMP2,TIMP2
THBS4	other	2,99E-03	COL3A1,HSPA5,P4HB
ITM2C	other	1,08E-02	APP
ELAVL3	other	3,20E-02	TUBB3
DSP	other	1,92E-04	COL1A1,COL1A2,COL3A1
CDON	other	4,25E-02	TUBB3
TRIM54	other	2,15E-02	FLNC
DYSF	other	2,13E-04	ACTG1,ANXA1,ANXA2,FN1,HSPB1,TIMP1
CYR61	other	1,48E-07	COL1A1,COL1A2,MMP1,MMP3,SERPINE1,TIMP1,TIMP2	142 (21)
PICALM	other	2,15E-02	APP
DCN	other	8,18E-08	BGN,COL1A2,FBN1,MMP1,MMP2,SERPINE1,TGFB1,THBS1	87 (16)
NEDD9	other	5,93E-04	APP,PGK1,SERPINE1,VIM	117 (11)
Hmgn3	other	4,39E-02	AHSG,SERPINH1
COL10A1	other	1,08E-02	HSPA5
Ewsr1	other	2,15E-02	LMNA
HNRNPA1	other	4,13E-04	APP,HNRNPA1,PKM
HRG	other	1,94E-02	SPARC,TIMP1
Pln	other	8,75E-13	AHSG,ALDOA,ANXA2,CALU,ENO1,EZR,GNAI2,HSP90B1,PGK1,TPI1,VCP,VIM
SNRPA	other	2,15E-02	APP
PRR13	other	1,08E-02	THBS1
GIMAP1-GIMAP5	other	3,45E-04	HSP90B1,HSPD1
ADM	other	1,59E-02	FN1,PGK1,TGFB1
WASF1	other	2,15E-02	EZR
RAPGEF3	other	1,76E-02	FN1,TGFB1
NBN	other	2,15E-02	CLU
FMR1	other	2,50E-08	ALDOA,APP,CFL1,EEF2,ENO1,GAPDH,PPIA,RPSA
GNRH2	other	4,25E-02	RPSA
SHC3	other	1,08E-02	APP
NET1	other	1,69E-03	FN1,SERPINE1	66 (7)
CNTNAP1	other	1,08E-02	APP
SERPINH1	other	4,92E-06	COL1A1,COL4A2,SERPINE1	61 (7)
SNRNP70	other	3,20E-02	APP
mir-155	microrna	1,15E-02	ANXA2,MMP3,SERPINE1,YWHAZ
mir-1	microrna	1,21E-04	ANXA2,FN1,HSP90B1,HSPD1,LASP1,PPIB,TAGLN2
mir-29	microrna	3,78E-03	COL1A1,MMP2,NID1,THBS1	134 (17)
mir-196	microrna	3,27E-04	ANXA1,COL1A1,KRT5
mir-183	microrna	1,58E-02	FN1,VIM
mir-122	microrna	1,52E-02	ALDOA,LAMC1,PKM,VIM
mir-133	microrna	1,07E-03	FN1,FSCN1,LASP1,TAGLN
mir-21	microrna	3,14E-02	COL1A1,COL3A1,MMP2,SOD3,TGFB1
mir-143	microrna	4,13E-04	COL3A1,MMP2,TAGLN
mir-138	microrna	4,25E-02	VIM
mir-145	microrna	9,13E-03	COL5A1,FSCN1,TAGLN
mir-375	microrna	4,25E-02	YWHAZ
mir-663	microrna	1,08E-02	HSPG2
mir-96	microrna	1,26E-02	FN1,VIM
mir-24	microrna	4,88E-03	FN1,SERPINE1,TGFB1
miR-338-3p (miRNAs w/seed CCAGCAU)	mature microrna	2,35E-03	TAGLN,VIM
miR-17-5p (and other miRNAs w/seed AAAGUGC)	mature microrna	2,26E-02	APP,MMP3,VIM
miR-382-5p (miRNAs w/seed AAGUUGU)	mature microrna	1,13E-03	TAGLN,VIM
miR-124-3p (and other miRNAs w/seed AAGGCAC)	mature microrna	3,26E-03	ARPC1B,B4GALT1,LAMC1,MYH9,NID1,OAF,PLOD3,TLN1
miR-296-5p (miRNAs w/seed GGGCCCC)	mature microrna	1,94E-02	COL1A1,MMP1
miR-29b-3p (and other miRNAs w/seed AGCACCA)	mature microrna	1,82E-08	COL1A1,COL1A2,COL3A1,COL4A2,COL5A2,FBN1,LAMC1,LOXL2,SPARC
miR-16-5p (and other miRNAs w/seed AGCAGCA)	mature microrna	2,17E-02	ARHGDIA,HSP90B1,LAMC1,SERPINE2,TPI1,UGDH
miR-196a-5p (and other miRNAs w/seed AGGUAGU)	mature microrna	1,92E-04	ANXA1,COL1A1,KRT5
miR-483-5p (miRNAs w/seed AGACGGG)	mature microrna	2,15E-02	ARHGDIA
miR-30a-3p (and other miRNAs w/seed UUUCAGU)	mature microrna	2,53E-02	THBS1,TUBA1A
miR-122-5p (miRNAs w/seed GGAGUGU)	mature microrna	7,84E-05	ALDOA,EEF1A1,P4HB,PKM,PRDX2,VIM
miR-133a-3p (and other miRNAs w/seed UUGGUCC)	mature microrna	1,05E-06	ARHGDIA,FBN2,FSCN1,LASP1,MSN,PKM,TPM4
miR-204-5p (and other miRNAs w/seed UCCCUUU)	mature microrna	3,18E-06	ARPC1B,BMP1,FBN2,MMP3,SPARC
miR-320b (and other miRNAs w/seed AAAGCUG)	mature microrna	2,35E-03	TAGLN,VIM
miR-188-3p (miRNAs w/seed UCCCACA)	mature microrna	2,15E-02	APP
miR-30c-5p (and other miRNAs w/seed GUAAACA)	mature microrna	6,11E-03	ANPEP,GNAI2,NT5E,NUCB1,SEC23A
miR-21-5p (and other miRNAs w/seed AGCUUAU)	mature microrna	2,48E-02	MMP2,SOD3,TAGLN
miR-1285-3p (and other miRNAs w/seed CUGGGCA)	mature microrna	4,25E-02	VIM
miR-145-5p (and other miRNAs w/seed UCCAGUU)	mature microrna	2,38E-03	FSCN1,MMP1,TAGLN,VASN
miR-706 (miRNAs w/seed GAGAAAC)	mature microrna	1,08E-02	SLC3A2
miR-199a-3p (and other miRNAs w/seed CAGUAGU)	mature microrna	1,26E-02	CALU,FN1
miR-199a-5p (and other miRNAs w/seed CCAGUGU)	mature microrna	1,76E-02	MMP1,TAGLN
miR-1-3p (and other miRNAs w/seed GGAAUGU)	mature microrna	8,95E-06	ANPEP,ANXA2,FBLN2,FSTL1,LASP1,NRP1,PPIB,TAGLN2,THBS1,TPM4,YWHAQ
let-7a-5p (and other miRNAs w/seed GAGGUAG)	mature microrna	4,80E-03	COL1A1,COL1A2,PXDN,TAGLN,THBS1,VIM
ESRRG	ligand-dependent nuclear receptor	3,07E-06	ENO1,GAPDH,LDHA,NRP1,PKM,TPI1	57 (7)
NR4A3	ligand-dependent nuclear receptor	1,86E-02	COL1A1,COL6A1,COL6A2
PPARG	ligand-dependent nuclear receptor	5,68E-07	ACLY,APOE,APP,C3,COL1A1,COL1A2,ERO1A,FN1,GAPDH,IGFBP3,IGFBP6,IGFBP7,MDH1,RPSA,SERPINE1,TKT,VIM,YWHAG	138 (19)
PPARD	ligand-dependent nuclear receptor	1,23E-02	APOE,FN1,LDHA,LDHB,MFGE8,THBS1
NR1H4	ligand-dependent nuclear receptor	2,60E-05	C3,LDHA,MMP2,MMP3,PGAM1,TGFB1,TIMP1,TIMP2,TPI1	88 (14)
ESR2	ligand-dependent nuclear receptor	2,87E-08	ANPEP,APOE,C3,COL1A1,COMP,ENPP2,IGFBP3,IGFBP4,KRT16,LMNA,LTBP1,MMP1,MMP2,NID2,PLEC,PTX3,SPTAN1,TIMP1,TIMP2,TP53I3	145 (18)
NR1H2	ligand-dependent nuclear receptor	4,29E-02	APOE,C3,RPS14
THRB	ligand-dependent nuclear receptor	1,47E-02	DCN,FSTL1,MMP2,PGD,TGFB1,TGFBI
PPARA	ligand-dependent nuclear receptor	1,44E-02	ANXA2,APOE,APP,ARHGDIA,ATP5B,C1S,C3,IGFBP3,IGFBP6,TALDO1
NR4A2	ligand-dependent nuclear receptor	2,76E-05	COL1A1,COL6A1,COL6A2,MMP1,MMP3,PTX3
PGR	ligand-dependent nuclear receptor	1,25E-04	COL6A1,COL6A2,DPYSL2,EZR,FN1,LAMB2,MVP,POSTN,SERPINA5,TGFBI,VCL	97 (7)
RARB	ligand-dependent nuclear receptor	8,98E-04	EZR,IGFBP3,KRT1,MMP1,TGFB1	117 (11)
AHR	ligand-dependent nuclear receptor	1,50E-21	A2M,ACTN1,ALB,APP,COL1A1,COL1A2,COL3A1,COL4A2,COL5A1,COL5A2,COL6A1,COL6A3,DCN,EFEMP1,EMILIN1,FBLN2,FBN2,FN1,HSP90AA1,HSPA5,LTBP1,LTBP2,MMP2,NID1,NID2,SERPINE1,TGFB1,TGFBI,THBS1,TIMP2,VCL,VIM	174 (20)
NR4A1	ligand-dependent nuclear receptor	9,30E-06	ACLY,ALDOA,APOE,COL1A1,COL6A1,COL6A2,NT5E,NUCB2,PDIA3,PGK1	79 (12)
NR0B2	ligand-dependent nuclear receptor	2,70E-02	ACLY,SERPINE1,TIMP1
NR3C2	ligand-dependent nuclear receptor	1,36E-04	COL1A1,COL3A1,FN1,PPIB,SERPINE1,TGFB1,TUBB3	135 (18)
AR	ligand-dependent nuclear receptor	6,86E-04	C3,CALU,COL3A1,ERO1A,HSPA5,IGFBP3,PLS3,SERPINE1,TGFB1,THBS1,TUBB3,VCL,VIM	122 (20)
NR3C1	ligand-dependent nuclear receptor	2,14E-03	A2M,ACTN1,ANXA1,APOE,APP,FN1,HSP90AB1,INHBA,KRT5,MMP1,SERPINE1,TGFB1,THBS1,TP53I3,YWHAG,YWHAZ	161 (18)
ESRRA	ligand-dependent nuclear receptor	8,87E-06	ATP5B,ENO1,GAPDH,HK1,LDHA,LDHB,PKM,TPI1	10 (2)
ESR1	ligand-dependent nuclear receptor	2,92E-06	ACTR2,APOE,C1QTNF5,C3,COL5A2,EFEMP1,ENO1,ENPP2,FBLN1,HSP90AA1,HSP90B1,HSPD1,HTRA1,IGFBP3,IGFBP4,KPNB1,LAMB1,LAMB2,LGALS3BP,LTBP1,MAN1A1,MMP1,NUCB1,PTX3,RDX,SERPINE1,SLC3A2,SPTAN1,SPTBN1,TGFB1,TIMP2,TP53I3,VIM	170 (18)
FXN	kinase	1,08E-02	ACLY
IPMK	kinase	8,29E-05	FLNC,HSP90AB1,PFN1,TAGLN2
VRK2	kinase	2,15E-02	TCP1
PRKCD	kinase	2,03E-02	COL1A1,COL1A2,MMP2,SERPINE1
GIT1	kinase	4,25E-02	MMP2
MAP2K4	kinase	2,26E-02	MMP1,PRDX1,TGFB1
CSNK1E	kinase	3,45E-04	APP,SERPINE1
PRKCE	kinase	3,58E-02	APP,HSP90AB1,HSPA5
ABL2	kinase	6,85E-04	MMP1,MMP3
FGFR4	kinase	1,76E-02	MMP1,SERPINE1
PRKAA1	kinase	3,07E-03	ALB,FN1,IGFBP4,LDHA,PCOLCE	72 (9)
PRKAA2	kinase	2,13E-05	ALB,FN1,HSPA5,IGFBP4,LDHA,P4HB,PCOLCE,VIM	117 (12)
MKNK1	kinase	1,01E-08	ANXA2,ANXA5,EEF1D,LAMB2,LAMC1,RNH1,SERPINH1,SPARC,TAGLN,VIM,YWHAG
ROCK2	kinase	2,23E-05	APP,KRT1,KRT10,MSN,SERPINE1
MAP2K1	kinase	1,88E-06	APOE,COL1A1,COL1A2,COL3A1,ENO1,HSPA5,MMP1,MMP2,MMP3,SERPINE2,THBS1	127 (18)
MAPK11	kinase	3,33E-03	PRDX1,TIMP1,TIMP2
IKBKB	kinase	1,59E-08	AEBP1,C3,CLU,DCN,ENPP2,IGFBP6,MMP1,MMP2,MMP3,NID1,PTX3,SERPINE2,SOD3,TGFB1,TIMP2,TLN1	137 (16)
MAPK8	kinase	2,31E-04	APOE,B4GALT1,COL1A1,MMP1,MMP2,MMP3,MVP,PTX3	146 (19)
MTOR	kinase	3,60E-09	ACLY,CLTC,ENO1,FN1,HSP90AB1,HSP90B1,HSPB1,MDH1,MDH2,PFN1,PKM,PPIB,PSMB5,RPL12,RPS18,SND1,SRPX
PRKG1	kinase	1,99E-08	COL1A1,COL3A1,FN1,SERPINE1,TAGLN,TGFB1,THBS1	131 (20)
CHUK	kinase	3,25E-07	AEBP1,C3,CLU,DCN,ENPP2,HSP90AA1,IGFBP6,MMP2,MMP3,NID1,PTX3,SERPINE2,SOD3	136 (16)
PTK2	kinase	1,25E-05	COL1A1,COL1A2,MMP2,PCOLCE2,THBS1,TIMP1	123 (21)
MAP3K3	kinase	2,53E-02	POSTN,TGFB1
PRKCA	kinase	1,36E-04	APP,COL1A1,FN1,IGFBP3,MMP1,MMP3,SERPINE1	105 (16)
AKT1	kinase	2,93E-07	ACLY,CST3,FN1,FSTL1,LAMB1,MMP2,PCOLCE,SERPINE1,SERPINF1,SLC3A2,THBS1,TIMP1,VCP,VIM	108 (18)
PIK3CA	kinase	1,17E-03	HSP90AB1,SERPINE1,SPARC,VIM	119 (11)
PRKCZ	kinase	4,65E-02	COL1A2,MMP2
AXL	kinase	4,06E-03	MMP1,MMP2,MMP3	89 (15)
ATM	kinase	5,10E-04	CLU,FN1,HSP90AA1,HSP90AB1,SERPINE1	154 (15)
PKM	kinase	2,82E-05	ENO1,LDHA,MMP2,PKM	97 (7)
EGFR	kinase	8,05E-25	ANXA1,COL1A1,COL3A1,COL5A2,COL6A1,COL6A2,CST3,FBLN2,FBN1,GPC1,HNRNPA1,HNRNPA2B1,HSP90B1,HSPA5,HSPB1,IGFBP3,IGFBP4,KRT16,LAMA4,MMP1,MMP2,MMP3,POSTN,PPIA,PSMB2,PSMB5,PSMB6,SERPINE1,SERPINE2,SRSF1,THBS1,TUBB4B,VCL,VIM	153 (21)
MAPK9	kinase	5,23E-06	ACLY,BMP1,GAPDH,LGALS3BP,LMNA,MMP3,PDIA3,PTX3,RPSA,SOD3
DDR1	kinase	1,64E-05	COL1A1,COL3A1,MMP1,MMP2	104 (16)
MET	kinase	1,41E-02	FN1,INHBA,MMP2,TGFB1
VRK1	kinase	3,20E-02	MMP1
MAPK10	kinase	5,98E-03	APP,MMP1	66 (7)
CDKN1A	kinase	7,75E-07	APP,FN1,HNRNPA2B1,HSPA5,INHBA,LGALS3BP,MMP1,MMP3,NPM1,SERPINE1,TP53I3,TUBB3,XRCC6	153 (19)
RAF1	kinase	4,98E-04	ANXA1,HNRNPA2B1,HSPB1,IGFBP3,LDHA,MMP1,MMP3,PLEC,TIMP1	108 (18)
PRKCQ	kinase	3,18E-02	MMP1,MMP2
STK16	kinase	3,20E-02	SERPINE1
DDR2	kinase	2,42E-05	COL1A1,MMP1,MMP2
ERBB4	kinase	2,74E-08	COL3A1,COL5A2,FBLN2,GPC1,IGFBP4,NID1,PGK1,SERPINE2,THBS1,TLN1	137 (13)
MAPKAPK2	kinase	1,86E-02	HSPA5,HSPB1,MMP2
MAP3K1	kinase	1,11E-07	COL3A1,HSPB1,MMP3,PRDX1,SERPINE1,TGFB1,THBS1,TIMP1	115 (19)
SPHK1	kinase	2,60E-05	APP,COL1A2,FN1,SERPINE1,TIMP1	105 (17)
ERBB3	kinase	8,08E-11	BGN,CLU,COL1A1,COL6A1,FBLN2,FBN1,LAMA4,MMP3,NID1,SPARC,THBS1,TLN1	146 (16)
PIK3R1	kinase	3,32E-02	COL1A2,MMP2,SERPINE1
RYK	kinase	1,08E-02	FN1
SRC	kinase	4,06E-05	COL1A2,ENO1,FN1,MMP1,MMP2,PGK1,POSTN,VIM	155 (22)
MAP2K7	kinase	3,14E-04	ENPP2,HSPA5,MMP3,PDIA3,SERPINC1
FGFR1	kinase	2,62E-04	COL1A1,EEF1A1,MMP1,MMP3,SPARC,VIM	138 (19)
ACVRL1	kinase	4,65E-02	SERPINE1,TAGLN
MAPK14	kinase	6,90E-05	COL1A1,FN1,MMP1,MMP3,PRDX1,TAGLN,TGFB1,TIMP1,TIMP2	120 (19)
MAP2K6	kinase	1,16E-03	BGN,MMP1,MMP2,MMP3,PRDX1	104 (17)
STK11	kinase	1,80E-03	A2M,ALB,CCT6A,LUM,MMP2,PSMB5,SERPINE1	122 (12)
FGFR2	kinase	8,53E-03	COL1A1,COL4A2,FN1,LAMB1,PCOLCE	129 (11)
MAP3K8	kinase	2,12E-02	APOE,BMP1,FSCN1,INHBA,MMP3
JAK2	kinase	3,91E-02	ACTN1,MYL12A,PFN1,THBS1
IKBKG	kinase	8,52E-07	AEBP1,C3,CLU,DCN,ENPP2,IGFBP6,NID1,PTX3,SERPINE2,SOD3	137 (18)
PIK3C2B	kinase	3,20E-02	KRT1
INSR	kinase	8,58E-06	ACTN4,ARHGDIA,ATP5B,CFL1,COL6A3,FBLN1,FLNC,GANAB,GAPDH,HSPD1,MDH2,MMP2,SERPINE1,TGFB1,THBS2
TGFBR1	kinase	6,27E-08	BGN,COL1A1,COL1A2,FN1,LTBP1,SERPINE1,TAGLN,TGFBI,VIM	115 (13)
AK1	kinase	8,75E-06	ENO1,GAPDH,LDHA,PKM
BMPR1B	kinase	3,18E-02	POSTN,SERPINE1
MAPK3	kinase	7,86E-04	B4GALT1,FN1,MMP1,THBS1,TIMP1	108 (15)
MAP2K3	kinase	1,01E-04	COL1A1,COL1A2,COL3A1,MMP1,MMP3,SERPINE1	146 (21)
PRKCB	kinase	3,14E-04	APP,FN1,MMP2,SERPINE1,TGFB1	108 (18)
PGK1	kinase	4,20E-05	MMP2,MMP3,VIM	66 (7)
PDPK1	kinase	2,99E-03	A2M,CST3,SERPINE1	106 (15)
CDK5	kinase	2,95E-02	IGFBP3,SPOCK1
ZAP70	kinase	2,26E-02	ANXA1,HSP90AA1,PLEC
MAPKAPK3	kinase	4,93E-03	HSPA5,HSPB1
PRKD1	kinase	3,64E-02	MMP1,MMP3
MAPK1	kinase	7,55E-07	ANPEP,APOE,C1S,FLNC,FN1,IGFBP7,LAMA4,LGALS3BP,LMNA,MMP1,MMP2,MVP,NRP1,NT5E,SPOCK1,VIM	139 (18)
ERBB2	kinase	6,09E-23	ANXA2,BMP1,CCDC80,CLEC11A,CLU,COL1A1,COL3A1,COL5A1,COL5A2,COL6A1,COL6A2,COL6A3,FBLN2,FN1,FSCN1,FSTL1,GPC1,HSPB1,HTRA1,IGFBP3,IGFBP4,IGFBP6,LAMB1,LTBP2,LUM,MAN1A1,MMP1,MMP3,NID1,NRP1,NUCB2,PDIA4,PGK1,PRDX2,SERPINE1,SPARC,SPOCK1,SRPX,TAGLN,TGFBI,THBS1,TUBA1A,VCL,VIM	131 (20)
ILK	kinase	4,75E-04	FN1,MMP2,RNH1,TGFB1	107 (16)
RET	kinase	2,12E-09	ANXA1,CLU,COL1A1,COL1A2,DCN,DPYSL2,HSP90AA1,HSPA8,HSPD1,LOX,MMP1,MMP3	141 (21)
PDK4	kinase	4,25E-02	PKM
PAK3	kinase	1,08E-02	APP
FLT1	kinase	1,27E-05	ACTN4,ACTR2,GDI2,HK1,RDX,THBS1,YWHAZ
PODXL	kinase	6,85E-04	MMP1,VIM
MAP3K7	kinase	5,35E-03	MMP1,MMP3,SERPINE1,SPTBN1	143 (17)
TGFBR2	kinase	1,89E-10	BGN,CLU,COL1A1,COL1A2,EXT2,FN1,MMP2,MMP3,NRP1,SERPINE1,SPARC,TAGLN,TGFB1,THBS1,TIMP1,VCL	139 (18)
NME1	kinase	1,17E-03	HNRNPA2B1,MMP2,SERPINE1,TIMP1	112 (19)
CSNK2A1	kinase	3,11E-03	FN1,VIM	72 (7)
CALHM1	ion channel	1,08E-02	APP
CACNA1C	ion channel	1,69E-03	ANXA2,ENO1
ITGAV	ion channel	2,33E-09	COL1A1,COL1A2,FN1,MMP1,MMP2,SERPINE1,TGFB1,TIMP1	109 (18)
CLCN3	ion channel	2,15E-02	TGFB1
CLCA2	ion channel	7,12E-03	FN1,VIM
P2RX4	ion channel	4,25E-02	MMP3
GJC1	ion channel	3,20E-02	TGFB1
TRPV4	ion channel	2,74E-02	THBS1,TIMP1
VDAC1	ion channel	3,20E-02	APP
FGF16	growth factor	4,25E-02	MMP2
BDNF	growth factor	6,13E-10	ANXA2,ANXA5,APP,EEF1D,FSCN1,HSP90AA1,HSPA5,LAMB2,LAMC1,MMP1,RNH1,SERPINH1,SPARC,TAGLN,TUBA1A,TUBB3,VASN,VIM,YWHAG	65 (7)
FGF21	growth factor	1,19E-02	ACLY,SERPINE1,TGFB1
IGF2	growth factor	1,67E-06	ARHGDIA,FN1,GNAI2,IGFBP3,IGFBP4,IGFBP6,MMP1,MMP3,SERPINE1,TGFBI,THBS2	121 (18)
HDGF	growth factor	1,24E-06	COL1A1,SERPINE1,TGFB1
AREG	growth factor	3,89E-02	MMP1,PTX3
LEFTY2	growth factor	2,15E-02	MMP3
PGF	growth factor	2,95E-02	DCN,SERPINE1
IGF1	growth factor	2,28E-13	A2M,ANPEP,APP,BGN,CLEC11A,CLU,COL1A1,COL3A1,FN1,GAPDH,HSPA5,IGFBP3,IGFBP4,IGFBP6,LASP1,MMP1,MMP2,MMP3,PCOLCE,SEC23A,SERPINE1,TGFB1,TGFBI,THBS1,TUBB3,VIM	142 (18)
NTF4	growth factor	1,26E-02	SPARC,TUBA1A
AGT	growth factor	5,76E-08	BGN,COL1A1,COL1A2,COL3A1,COL6A1,EFEMP1,FN1,HSPB1,HSPG2,IGFBP3,IGFBP4,LAMB1,MMP2,PFN1,POSTN,SERPINE1,SOD3,TGFB1,TIMP1,TUBB3	97 (17)
GDF2	growth factor	3,82E-07	COL1A1,ENPP2,HTRA1,NRP1,POSTN,SERPINE2,SERPINF1,SLC3A2,TUBB3
INHBB	growth factor	5,56E-07	COL3A1,MMP3,SERPINE1,THBS1,TIMP1	45 (3)
NGF	growth factor	1,43E-02	ANXA2,APP,EEF1A1,MMP2,MMP3,TGFB1
PDGFB	growth factor	1,80E-06	COL1A1,COL1A2,FN1,MMP2,MMP3,THBS1,TIMP1	109 (19)
BMP15	growth factor	2,32E-02	PAPPA,PTX3
MSTN	growth factor	1,82E-04	FN1,INHBA,SERPINH1,TGFB1,VIM	163 (20)
FGF3	growth factor	3,97E-03	KRT5,MMP2
VEGFA	growth factor	1,38E-07	ANPEP,COL1A1,CST3,FN1,HK1,IGFBP4,LMNA,MDH2,MMP1,MMP2,SERPINE1,SPARC,TGFB1,THBS1	138 (19)
INHBA	growth factor	8,07E-04	ACTN1,FN1,INHBA,LOX,MMP2,SERPINE1,TAGLN,TIMP1	88 (17)
LEP	growth factor	1,02E-06	ACLY,APOH,APP,COL1A1,COL3A1,GAPDH,HSPA5,IGFBP3,MMP1,MMP2,MMP3,PRDX1,SERPINE1,SPARC,TGFB1,THBS1,TIMP1,VIM	99 (17)
TGFA	growth factor	1,85E-03	ALB,IGFBP4,SERPINE1,TGFB1,VIM	100 (20)
GDF9	growth factor	6,60E-04	HSPG2,INHBA,LOX,PTX3
FGF1	growth factor	3,42E-02	ALB,APOE,POSTN,THBS1
INHA	growth factor	1,53E-08	COL1A2,COL3A1,COL6A1,COMP,IGFBP4,INHBA,LMNA,LTBP1,MMP2,PTX3,SERPINE1	63 (8)
GH1	growth factor	8,66E-09	ALB,APOE,C3,CLU,COL3A1,FN1,IGFBP3,PRDX1,PRDX3,TKT,TUBA1A,UGDH,VIM,XRCC6,YWHAZ	121 (14)
NRG1	growth factor	2,20E-03	ACTN1,COL1A1,COL6A3,EEF1A1,FSTL1,VCL,VIM,XRCC6	135 (15)
FGF10	growth factor	1,95E-02	ANXA1,ANXA2,TGFB1
WISP2	growth factor	1,41E-05	FN1,IGFBP7,SERPINE1,SPARC,TGFB1,VIM	66 (7)
ANGPT2	growth factor	9,21E-18	CCT7,COL1A1,COL1A2,COL3A1,EXT2,FKBP10,FN1,HSP90AA1,HSPA5,HSPD1,MFGE8,MMP1,MMP2,P4HB,PDIA3,PDIA6,POSTN,SERPINE1,SOD3,THBS1,THBS2,TUBB3,VIM	94 (17)
DKK1	growth factor	1,86E-02	COL1A1,SPARC,TAGLN
FGF8	growth factor	1,58E-02	PCOLCE2,SPARC,THBS1,TUBB3
GDNF	growth factor	5,64E-03	DPYSL2,EEF2,FN1,RPSA	66 (7)
FGF2	growth factor	1,11E-18	ALB,ANPEP,BGN,COL1A1,COL1A2,COL3A1,DCN,ENO1,ENPP2,FBN1,FN1,IGFBP3,IGFBP4,INHBA,LMNA,LOX,MMP1,MMP2,MMP3,PGK1,SERPINE1,SPARC,TAGLN,TGFB1,THBS1,TIMP1,TUBB3,VIM,XRCC6,YWHAZ	145 (19)
CTGF	growth factor	5,12E-12	COL1A1,COL4A2,DCN,EMILIN1,ENO1,FN1,LOX,MMP1,MMP2,MMP3,SERPINE1,SPARC,TGFB1,TIMP1	98 (18)
TGFB1	growth factor	2,63E-45	ACLY,ACTN1,ALB,ANPEP,ANXA2,APOE,APP,BGN,BMP1,C1S,CCT2,CCT6A,CFL1,CLU,COL1A1,COL1A2,COL3A1,COL4A2,COL5A1,COL6A1,COL6A2,COL6A3,COMP,CST3,DCN,ECM1,EEF1A1,EMILIN1,EXT1,EXT2,FBLN2,FBN1,FN1,FSCN1,GARS,GNAI2,HEXA,HEXB,HSP90AA1,HSPA5,HSPB1,HSPG2,HTRA1,IGFBP3,IGFBP4,IGFBP6,IGFBP7,INHBA,KRT10,LAMC1,LASP1,LDHA,LOX,LOXL2,LTBP1,LTBP2,MMP1,MMP2,MMP3,MSN,MYH9,MYL12A,NRP1,NT5E,NUCB2,PAPPA,PCBP1,PCOLCE2,PGK1,PLOD…	166 (19)
ANGPTL3	growth factor	4,25E-02	HSPG2
NOV	growth factor	8,29E-05	COL1A1,MMP1,MMP2,SERPINE1	137 (23)
GDF5	growth factor	4,25E-02	COL1A1
KITLG	growth factor	8,39E-04	BMP1,CLIC1,EEF1A1,IGFBP3,KPNB1,MMP2,NPM1,PKM,PSMB5
BMP7	growth factor	5,47E-05	COL1A1,COL1A2,FN1,IGFBP3,IGFBP4,IGFBP6,MMP2,SERPINE1	88 (16)
BMP6	growth factor	4,08E-04	INHBA,PCOLCE2,SERPINE1,TAGLN,TIMP1,VCL	54 (8)
HGF	growth factor	7,71E-10	A2M,COL1A1,COL1A2,COL3A1,FN1,HK1,IGFBP3,IGFBP4,INHBA,LDHA,MMP1,MMP2,NID2,NRP1,PGAM1,PGK1,PLOD1,SERPINE1,TAGLN2,TGFB1,THBS1,TIMP1,VIM,YWHAZ	108 (20)
INHBC	growth factor	3,20E-02	INHBA
EGF	growth factor	3,82E-18	ACTN1,ANPEP,B4GALT1,CLU,COL1A1,COL1A2,COL3A1,DCN,EEF1A1,EZR,FN1,FSTL1,IGFBP3,IGFBP4,INHBA,KRT16,KRT5,LDHA,MMP1,MMP2,MMP3,NRP1,PPIB,PSMB2,PSMB5,PSMB6,SERPINE1,SPARC,TGFB1,THBS1,TIMP1,VCL,VIM,XRCC6	104 (17)
CLEC11A	growth factor	2,93E-03	ALDOA,ANXA1,LDHA,TKT
GDF10	growth factor	1,08E-02	SERPINE1
BMP2	growth factor	4,95E-03	COL1A1,COL1A2,FN1,POSTN,SPARC,TAGLN,TIMP1	90 (21)
JAG1	growth factor	3,64E-02	COL1A1,TAGLN
TGFB3	growth factor	1,72E-14	COL1A1,COL1A2,COL3A1,COL5A1,EEF1D,FN1,HTRA1,LTBP2,MMP1,MMP2,MMP3,SERPINE1,SERPINE2,TAGLN,TGFB1,THBS1	141 (18)
TGFB2	growth factor	1,25E-08	CD248,COL1A1,COL1A2,COL3A1,FN1,HSPG2,SERPINE1,TAGLN,TGFB1,THBS1,TIMP1	98 (17)
PDGFC	growth factor	2,48E-06	COL1A2,COL4A2,TGFB1,TIMP1,TIMP2
Srebp	group	9,68E-03	ACLY,PGD
Sos	group	6,49E-03	B4GALT1,LGALS3BP,MMP3,MYH9,PFN1,TGFB1,YWHAZ
Pdgfr	group	4,93E-03	FN1,VIM	108 (15)
Creb	group	4,04E-02	FSCN1,KRT1,LASP1,MMP1,MMP2,PGK1
Pkg	group	8,97E-04	PRDX2,TLN1,VCL
SYK/ZAP	group	8,36E-03	MMP1,TIMP1	100 (15)
Tgf beta	group	2,88E-19	BGN,CLU,COL1A1,COL1A2,DCN,FBLN2,FN1,FSCN1,FSTL1,HSPG2,IGFBP3,KRT1,KRT16,LOX,MMP1,MMP2,MMP3,POSTN,SERPINE1,SPARC,TAGLN,TGFB1,TGFBI,TIMP1,TIMP2,VIM	138 (17)
ERK1/2	group	2,97E-07	CLEC11A,COL1A1,COL3A1,ENO1,EZR,HSPA5,IGFBP3,MMP1,MMP2,MMP3,POSTN,PSMB6,SERPINE1,TIMP1,TIMP2	110 (17)
P38 MAPK	group	2,47E-07	ANXA5,BGN,COL3A1,FN1,HSPA5,HTRA1,INHBA,MMP1,MMP2,MMP3,POSTN,SERPINE1,TGFB1,THBS1,TIMP1,TIMP2,TP53I3	108 (18)
STAT	group	6,81E-03	A2M,MMP1,TIMP1
p70 S6k	group	1,64E-03	EEF1A1,EEF2,VIM	53 (7)
Pkc(s)	group	1,72E-05	APP,COL3A1,FN1,HSP90B1,HSPA5,MMP1,MMP2,P4HB,PDIA4,SERPINE1,TGFB1	100 (16)
MAP2K1/2	group	4,01E-03	C3,HSPA5,TGFB1,VIM	72 (7)
Pld	group	4,25E-02	FN1
caspase	group	3,64E-02	APP,THBS1
Ras	group	5,80E-05	ANPEP,B4GALT1,MMP1,MMP2,NPM1,PRDX1,SERPINE1,SERPINE2	111 (18)
Ubiquitin	group	3,63E-07	HSP90AA1,HSP90B1,HSPA5,HSPD1,MMP2,TIMP2	56 (7)
Tnf receptor	group	8,29E-05	C3,SERPINE1,TGFB1,TIMP1	140 (15)
IL1	group	2,57E-08	ALB,APOE,APP,C3,COL1A1,DCN,FN1,INHBA,LAMB1,LAMB2,LOX,MMP1,MMP2,MMP3,SERPINE1,SPARC,TGFB1,TIMP1	152 (19)
FKHR	group	2,15E-02	A2M
Beta Secretase	group	2,15E-02	APP
Ikb	group	2,32E-02	HSPA5,MMP1
Jnk	group	2,23E-08	A2M,ANXA5,APP,COL1A1,COL3A1,FN1,HSPA5,MMP1,MMP2,MMP3,POSTN,SERPINE1,TGFB1,TIMP1	107 (19)
Gα12/13	group	3,20E-02	MMP1
Mek	group	1,80E-03	ANPEP,APOE,CLU,COL1A2,SERPINE1,THBS1,VIM	122 (21)
Rock	group	1,34E-04	APP,COL1A1,COL3A1,FN1,TGFB1	104 (19)
Vegf	group	1,59E-04	A2M,ANPEP,ENPP2,FN1,IGFBP3,IGFBP4,INHBA,MMP2,NID2,NRP1,TGFB1,TIMP1,VIM,YWHAZ	140 (17)
Rac	group	5,98E-03	MMP1,THBS2
IL-1R	group	1,18E-04	APP,COL3A1,MMP1,MMP3	116 (20)
Rar	group	4,65E-02	MMP1,SERPINF1
ETS	group	1,94E-02	SERPINE1,TIMP1
Akt	group	8,39E-04	A2M,COL3A1,FN1,LMNA,MMP2,PTX3,SERPINE1,THBS1,THBS2	106 (17)
Metalloprotease	group	4,25E-02	FN1
JUN/JUNB/JUND	group	1,94E-02	C3,MMP1
Nuclear factor 1	group	4,06E-03	ALDOA,COL1A1,LOX
DNAJ	group	1,08E-02	ENPP2
Tcf 1/3/4	group	2,42E-05	AHSG,ALB,APOH
Angiotensin II receptor type 1	group	1,42E-02	SERPINE1,TIMP1
Insulin	group	2,11E-12	ACLY,AEBP1,ALB,ALDOA,APOE,APP,COL1A1,ERO1A,FN1,HSP90B1,HSPA5,IGFBP3,IGFBP4,LGALS3BP,MDH2,MMP2,MMP3,NUCB2,PGK1,PKM,SERPINE1,TGFB1,TGFBI	159 (21)
ERK	group	4,05E-09	ACTN1,BGN,CLU,COL1A1,COL3A1,DPYSL2,FN1,LAMB1,MMP1,MMP2,MMP3,SERPINE1,SPTBN1,THBS1,TIMP1,TUBA1A	117 (20)
Raf	group	3,41E-02	ANPEP,TAGLN
PARP	group	2,35E-03	APOE,VIM
Ptk	group	2,35E-03	A2M,TGFB1
Lamin b	group	1,08E-02	LMNA
ECE	group	1,08E-02	APP
Relaxin	group	2,74E-02	MMP1,TIMP1
Alpha catenin	group	9,48E-20	BGN,COL1A1,COL1A2,COL3A1,COL5A1,COL5A2,COL6A1,COL6A2,COL6A3,FSTL1,IGFBP4,IGFBP6,IGFBP7,LAMA2,LAMA4,LUM,MMP2,PTX3,THBS2,TIMP1,VIM	61 (7)
APH-1	group	4,25E-02	APP
Growth hormone	group	1,23E-02	ALB,COL1A1,FN1,IGFBP3,IGFBP6
Focal adhesion kinase	group	4,14E-02	MMP2,TAGLN
estrogen receptor	group	9,26E-13	ANXA1,C3,COL4A2,COL5A1,COL6A1,COL6A2,FLNC,FN1,HSP90AA1,LOXL2,MAN1A1,MMP1,MSN,NT5E,SERPINE1,SPARC,TGFB1,TIMP1,TIMP2,VIM	110 (15)
elastase	group	4,93E-03	MMP2,MMP3	143 (17)
Collagen Alpha1	group	1,92E-04	COL1A1,MMP2,TIMP2	66 (7)
Pro-inflammatory Cytokine	group	5,10E-04	APOE,CLU,HSPA5,MMP3,TIMP1	104 (16)
hyaluronidase	group	2,15E-02	FN1
Hspg	group	3,20E-02	MMP1
PDGF (family)	group	8,94E-07	HSPD1,P4HB,PDIA3,VIM
TCF	group	4,59E-06	CCT8,ECM1,HTRA1,KRT5,MMP2,PLS3,RCN1,SERPINA5	73 (7)
GPR65	g-protein coupled receptor	4,25E-02	MMP3
LTB4R2	g-protein coupled receptor	3,97E-03	MMP1,MMP2	72 (7)
FZD8	g-protein coupled receptor	8,36E-03	COL1A1,FN1	124 (11)
F2R	g-protein coupled receptor	2,48E-02	FN1,TAGLN,THBS1
C3AR1	g-protein coupled receptor	4,92E-02	C3,HSPA5
PTGER2	g-protein coupled receptor	8,86E-04	APP,ECM1,SERPINE1,THBS1,TIMP1,TIMP2	122 (19)
ADORA2A	g-protein coupled receptor	1,48E-07	APP,COL3A1,COL6A1,EEF2,GAPDH,P4HB,PGAM1,SPARC,SPTBN1,TGFB1,TUBB3	59 (7)
CXCR4	g-protein coupled receptor	2,26E-02	IGFBP7,MMP2,PGK1
ADRA1B	g-protein coupled receptor	1,42E-02	COL3A1,FN1,LOX
ADRA1A	g-protein coupled receptor	1,67E-02	COL3A1,FN1,LOX
ADRA1D	g-protein coupled receptor	1,42E-02	COL3A1,FN1,LOX
S1PR2	g-protein coupled receptor	1,11E-02	TGFB1,TIMP1
AGTR1	g-protein coupled receptor	6,60E-04	COL3A1,FN1,SERPINE1,TGFB1	121 (19)
CXCR3	g-protein coupled receptor	6,26E-04	COL1A1,FN1,MMP1	106 (14)
ADORA2B	g-protein coupled receptor	5,32E-04	COL1A2,SERPINE1,TGFB1,TIMP1	138 (18)
RHO	g-protein coupled receptor	1,71E-07	APP,COL1A2,FBLN1,LAMB2,NID1,NT5E,PCOLCE,SPOCK1
ADRB1	g-protein coupled receptor	3,59E-05	APP,COL3A1,HSPA5,THBS1	97 (14)
CCR1	g-protein coupled receptor	2,68E-03	MMP2,SPARC,VIM
DRD2	g-protein coupled receptor	3,41E-02	IGFBP3,TGFB1
SMO	g-protein coupled receptor	1,16E-03	BGN,COL4A2,FBLN2,KRT5,LUM	70 (7)
CCR2	g-protein coupled receptor	7,19E-05	APP,FN1,MMP2,TGFB1,TIMP1,TIMP2	97 (18)
NCF1	enzyme	4,13E-04	FN1,SERPINE1,TGFB1	135 (18)
ALKBH5	enzyme	3,18E-04	CLU,EEF1D,HSPA8,PRDX4,SERPINA5,UBA1
ZBED1	enzyme	4,25E-02	RPL12
RHOJ	enzyme	4,51E-05	ACTG1,ANXA1,CALU,MYH9
MGEA5	enzyme	3,33E-09	ACTG1,ACTN4,APOE,FBLN1,FN1,FSCN1,HSP90AB1,IGFBP3,IGFBP4,IGFBP7,LAMB1,PRDX4,SERPINE2,TGFB1,TGFBI,THBS1,TIMP1,TIMP2,TUBA1A,VIM	92 (13)
ENTPD7	enzyme	1,08E-02	APP
CHI3L1	enzyme	2,68E-03	COL6A1,COL6A2,SERPINE1
GALNT6	enzyme	3,20E-02	FN1
PNPLA8	enzyme	3,11E-03	HSP90B1,HSPA5	3 (2)
CHD5	enzyme	3,20E-02	VIM
SGMS1	enzyme	3,20E-02	APP
EDEM1	enzyme	3,20E-02	HSPA5
ENTPD5	enzyme	1,13E-03	COL1A1,COL1A2
ENTPD2	enzyme	4,25E-02	SERPINE1
PLCL2	enzyme	4,25E-02	SPARC
ZDHHC21	enzyme	1,08E-02	APP
NDST2	enzyme	4,25E-02	FN1
FH	enzyme	2,54E-04	LDHA,LTBP2,TKT
ZDHHC7	enzyme	2,15E-02	APP
KDM4B	enzyme	2,15E-02	VIM
DHCR24	enzyme	2,15E-02	APP
NCEH1	enzyme	2,15E-02	HSPA5
FBXL2	enzyme	1,08E-02	APP
IDH2	enzyme	8,36E-03	FN1,VIM
RRM2	enzyme	4,25E-02	THBS1
XDH	enzyme	5,93E-04	MMP2,SERPINE1,TIMP2,VIM	113 (20)
IRS1	enzyme	5,80E-05	COL3A1,COL4A2,COL6A1,COL6A3,IGFBP4,LAMA4,NRP1,TGFBI	87 (3)
RAP1B	enzyme	2,15E-02	FN1
BAG6	enzyme	2,35E-03	COL1A1,SERPINE1
PLCG1	enzyme	8,36E-03	SERPINE1,THBS1	84 (11)
CBS/CBSL	enzyme	5,98E-03	EEF1A1,EEF1D
GFPT1	enzyme	4,93E-03	TGFB1,THBS1	58 (8)
ALDH1A2	enzyme	1,04E-09	BGN,COL1A2,COL3A1,IGFBP4,PCOLCE,SPARC,TGFBI,TIMP1	127 (7)
CAT	enzyme	1,41E-05	COL1A1,MMP1,SERPINE1,THBS1,TIMP1,VIM	108 (18)
SOD2	enzyme	5,79E-04	MMP1,MMP2,MMP3,SERPINE1,TGFB1,YWHAZ	110 (16)
HMOX1	enzyme	5,65E-03	COL1A1,SPARC,TGFB1,THBS1,THBS2	62 (12)
LOXL2	enzyme	3,97E-03	FN1,VIM
UBA2	enzyme	1,08E-02	ALB
IDH1	enzyme	5,32E-04	FN1,PGK1,SERPINH1,VIM	97 (7)
ACOX1	enzyme	9,80E-04	ANXA2,COL4A2,HSPA5,LGALS3BP,MFGE8,RPL12,TAGLN2
RAG2	enzyme	2,53E-02	COL6A2,NT5E
FN1	enzyme	7,36E-14	ACTN4,ACTR2,APOE,APP,CCT4,COL1A1,FN1,GDI2,HK1,MMP1,MMP2,MMP3,RDX,SERPINE1,SPARC,TAGLN,TGFB1,THBS1,TIMP2,YWHAZ	143 (18)
PLCD1	enzyme	3,11E-03	TGFB1,VIM
EGLN1	enzyme	1,77E-03	INHBA,MMP3,PGK1,TGFB1
B4GALT1	enzyme	3,11E-03	COL1A1,TGFB1
SPTLC2	enzyme	3,86E-07	COL1A1,HSPA5,MMP2,THBS1,TIMP1
HSD11B2	enzyme	4,25E-02	COL1A1
HAO1	enzyme	3,20E-02	HSPA5
RLIM	enzyme	1,41E-04	FN1,SERPINE1,VIM
TERT	enzyme	1,64E-06	CALU,COL5A2,EFEMP1,HTRA1,IGFBP4,MFGE8,MMP1,MMP2,MMP3,VIM	107 (15)
ARF3	enzyme	1,08E-02	APP
CD44	enzyme	8,02E-14	BGN,CLU,COL1A1,COL3A1,COL5A2,ECM1,EMILIN1,FN1,HSP90AB1,LAMB1,LAMC1,LTBP1,LTBP2,MMP2,MMP3,THBS1,THBS2,VCP,VIM	147 (19)
PHGDH	enzyme	3,20E-02	MMP2
DICER1	enzyme	1,17E-02	ANPEP,SERPINE1,SERPINF1,SPARC,THBS1,VIM
P4HB	enzyme	3,45E-04	PDIA3,PDIA4
YWHAZ	enzyme	5,13E-04	HSP90B1,HSPA5,MMP1	40 (5)
GBP1	enzyme	1,08E-02	MMP1
RALBP1	enzyme	9,93E-05	COL1A2,GAPDH,MMP2
POR	enzyme	4,68E-02	ACLY,ACTG1,ANXA5,PGD,UGDH
CUL3	enzyme	4,25E-02	MMP1
FECH	enzyme	4,39E-02	COL3A1,COL6A3
NPR1	enzyme	7,67E-06	COL1A1,COL3A1,FN1,MMP2,TGFB1	91 (12)
LIPE	enzyme	3,83E-04	COL1A1,COL1A2,GAPDH,POSTN,PRDX2,TKT,YWHAG	57 (7)
KRAS	enzyme	1,02E-21	ALDOA,ANPEP,BGN,CCDC80,CLU,COL1A1,COL3A1,EEF1A1,EFEMP1,ERO1A,FBLN2,FBN1,FN1,FSTL1,HEXA,HSPA5,LOX,MMP2,MMP3,NT5E,PCOLCE,PDIA3,PRDX4,RNH1,RPSA,SERPINE2,SLC3A2,SPARC,TCP1,THBS1,TIMP2,VCP,VIM	166 (19)
CD38	enzyme	7,87E-06	ALDOA,ANXA2,ANXA6,ERO1A,NT5E,PDIA6,PKM,PRDX4,TPI1,VIM
GPI	enzyme	1,11E-02	FN1,VIM
TGM2	enzyme	3,63E-02	C3,FN1,MMP2,SEMA7A,TGFB1,THBS1
WFS1	enzyme	1,13E-03	ERO1A,HSPA5
EFEMP1	enzyme	3,20E-02	VIM
GNA12	enzyme	1,66E-05	EZR,MMP2,PSMB5,RDX,TAGLN,VCL,VIM
PIN1	enzyme	9,12E-07	COL3A1,FN1,MMP2,MMP3,TGFB1,TIMP1,TP53I3	104 (17)
RAC1	enzyme	1,13E-04	COL1A2,DPYSL2,FN1,HSPB1,MMP1,MMP2,TGFB1	142 (17)
RAC2	enzyme	1,08E-04	ALDOA,ANXA1,LDHA,PKM,TKT
LOX	enzyme	1,94E-02	COL3A1,KRT10
SAT1	enzyme	9,68E-03	GAPDH,IGFBP3
OCLN	enzyme	4,20E-05	MMP1,MMP2,MMP3	55 (7)
LCAT	enzyme	1,87E-03	APOE,CLU,HSPA5	50 (7)
ARSA	enzyme	4,25E-02	TGFB1
CTBP1	enzyme	2,21E-04	COL1A2,ENPP2,FSCN1,THBS1
TIAM2	enzyme	2,15E-02	VIM
QPCT	enzyme	1,08E-02	APP
APC	enzyme	2,17E-02	CLU,MDH2,MMP3,TIMP1
DDX1	enzyme	1,08E-02	HTRA1
GPD1	enzyme	3,53E-03	ACLY,ANXA2,APP,CD248,SERPINE2
PTGS2	enzyme	3,14E-04	ANXA1,ANXA2,CLU,EZR,FN1,IGFBP3,MMP1,MMP2	148 (16)
DIO3	enzyme	4,39E-02	COL6A1,SEMA7A
ADA	enzyme	1,91E-04	COL1A2,SERPINE1,TGFB1,TIMP1	40 (5)
WWOX	enzyme	1,76E-02	COL1A1,TIMP2
PRMT1	enzyme	2,13E-02	HSP90AA1,PRDX3
MOGAT1	enzyme	3,20E-02	TIMP1
DROSHA	enzyme	3,20E-02	THBS1
MPO	enzyme	3,20E-02	APP
SMPD1	enzyme	2,54E-04	COL1A1,MMP1,TGFB1	127 (17)
TAZ	enzyme	1,57E-08	ANXA1,ENPP2,FN1,KRT5,LOX,LUM,SERPINE1,TAGLN,TGFB1
HSPA5	enzyme	2,57E-08	ACLY,APP,CLU,HSP90B1,HSPA5,HSPA8,P4HB	7 (2)
ICMT	enzyme	6,36E-09	ACTN4,AEBP1,ATP5B,FSTL1,LMNA,TGFBI,THBS2
SMURF2	enzyme	8,36E-03	FN1,SERPINE1	61 (14)
MTHFR	enzyme	2,15E-02	APP
NOS2	enzyme	1,54E-02	APP,LGALS3BP,SERPINH1,TGFB1,TIMP1,TKT
RND3	enzyme	1,11E-02	MMP2,VIM
DNM1	enzyme	4,25E-02	APP
ANXA1	enzyme	4,14E-02	ANXA1,ANXA2
RAB7A	enzyme	3,20E-02	VIM
HRAS	enzyme	4,55E-29	A2M,ACTG1,ANXA2,ANXA6,APP,ATP5B,BMP1,CALU,CCDC80,CLU,COL1A1,COL1A2,COL3A1,COL5A2,COL6A2,EFEMP1,FBLN2,FN1,FSTL1,HNRNPA2B1,HSP90AA1,HSPA8,HSPB1,HTRA1,IGFBP4,KRT16,LASP1,MFGE8,MMP1,MMP2,MMP3,MYL12A,NID1,NID2,NRP1,P4HB,PFN1,PLOD1,PLS3,POSTN,SERPINE1,SERPINE2,SPARC,TAGLN,TGFB1,THBS1,VCL,VIM	155 (18)
PDIA6	enzyme	1,16E-04	HSP90B1,HSPA5
GPX4	enzyme	3,20E-02	MMP1
AGXT	enzyme	2,15E-02	COL3A1
NOX4	enzyme	2,32E-02	FN1,MMP2
CTH	enzyme	3,20E-02	HSPA5
RHOA	enzyme	1,72E-04	COL1A1,COL3A1,FN1,MMP1,TAGLN,TGFB1	149 (19)
PLA2G5	enzyme	3,11E-03	COL1A2,COL3A1
ADCY3	enzyme	1,08E-02	NRP1
GAPDH	enzyme	4,92E-02	ENO1,GAPDH
HNRNPAB	enzyme	7,12E-03	HTRA1,VIM
NAT8B	enzyme	2,15E-02	APP
MYH9	enzyme	4,25E-02	VCL
PARK2	enzyme	4,92E-02	PRDX1,PRDX2
CETP	enzyme	1,26E-02	APOE,HSPA5
BRAF	enzyme	1,67E-02	MMP1,SERPINE2,THBS1
ACO1	enzyme	1,92E-04	APP,GAPDH,IGFBP3
LAMB2	enzyme	2,15E-02	LAMB1
PTGES	enzyme	2,38E-03	ANXA1,ANXA2,EZR,VIM
DNM2	enzyme	3,20E-02	MMP2
CYBA	enzyme	4,93E-03	FN1,SERPINE1	129 (14)
GNA15	enzyme	4,22E-03	C3,LAMB2,TAGLN,TIMP1,UGDH
SOD1	enzyme	1,09E-05	APOE,CLU,COL1A1,EZR,HSPA8,HSPB1,INHBA,PSMB5,RDX,TGFB1,TLN1	144 (11)
SPRED2	cytokine	1,08E-02	VIM
FAM3B	cytokine	1,28E-07	DCN,FN1,IGFBP3,IGFBP4,LDHA,SPARC	59 (7)
CNTF	cytokine	1,85E-03	A2M,MMP1,TGFB1,TIMP1,VIM	93 (13)
CXCL8	cytokine	4,29E-02	ANXA1,HSPG2,MMP2
CSF1	cytokine	3,51E-02	APOE,FN1,HSP90B1,HSPA5,THBS1
PRL	cytokine	6,36E-23	A2M,ANXA2,ANXA5,APP,CLU,COL1A1,COL1A2,COL3A1,COL5A1,CST3,DCN,ECM1,ENO1,FN1,HSPD1,IGFBP3,KRT5,LAMC1,MFGE8,MSN,P4HB,PCOLCE,PDIA4,RPSA,SND1,SPARC,TGFB1,TIMP1,TIMP2,VIM,YWHAG	148 (17)
TNFSF12	cytokine	1,70E-02	MMP1,MMP3,PTX3,TIMP1
WNT1	cytokine	5,80E-05	CCDC80,EEF1A1,ENPP2,FN1,ISLR,KRT5,MMP3,SERPINE1	87 (10)
NAMPT	cytokine	2,32E-02	MMP1,MMP3
IL11	cytokine	2,00E-04	A2M,ANXA2,EZR,MMP1,TIMP1	78 (14)
CTF1	cytokine	3,68E-03	A2M,MMP1,TIMP1	94 (14)
IL10	cytokine	1,41E-02	COL1A1,DCN,IGFBP4,MMP1,MMP2,PTX3,TGFB1,TIMP1,TUBB4B
IL5	cytokine	1,72E-09	A2M,ALDOA,ANXA2,ANXA6,ENO1,ERO1A,HSP90B1,HSPA5,LUM,PDIA6,PKM,PRDX4,QSOX1,SRI,TGFB1,TPI1,TPM4,VIM
IL24	cytokine	7,92E-03	HSP90B1,HSPA5,XRCC6
CCL1	cytokine	4,93E-03	MMP2,SERPINE1	55 (7)
Il3	cytokine	3,72E-02	ANPEP,TCP1,YWHAG
IL3	cytokine	2,64E-04	CLEC11A,EEF1A1,HK1,HNRNPA2B1,HSP90B1,HSPA5,KPNB1,NRP1,PSMA5,RPS14,SLC3A2,YWHAG
WNT5A	cytokine	5,43E-03	COL1A1,ENPP2,FN1,SPARC,VIM	149 (20)
IL4	cytokine	9,15E-08	ANXA2,ANXA6,APOE,C3,COL1A1,COL1A2,COL6A2,COL6A3,EIF4A1,EXT1,FN1,IGFBP4,KRT1,KRT10,LGALS3BP,MMP1,MMP2,MMP3,NRP1,POSTN,SERPINE1,TGFB1,TGFBI,TIMP1,TIMP2,VIM,XRCC6	109 (17)
SPP1	cytokine	6,12E-08	COL1A1,FN1,LOX,MMP1,MMP2,PGD,PLOD1,SERPINE1,SERPINF1,TGFB1,TIMP1,VAT1,VIM	132 (17)
CCL18	cytokine	2,35E-03	MMP2,TGFB1
CCL2	cytokine	1,38E-04	INHBA,MMP1,MMP2,SERPINE1,TGFB1,TIMP1	100 (15)
CSF3	cytokine	3,36E-02	ARHGDIA,CST3,HSPD1,MMP2,TGFB1
CCL20	cytokine	2,15E-02	POSTN
CXCL12	cytokine	3,07E-03	BMP1,FN1,IGFBP7,LOXL2,MMP2,MMP3,VIM	148 (20)
IL22	cytokine	1,58E-02	HSPB1,KRT1,MMP1,MMP3
CSF2	cytokine	9,44E-03	ANXA1,C3,HSPD1,INHBA,MMP1,MMP2,NRP1,QSOX1,TGFB1,THBS1,TPM4	143 (18)
CX3CL1	cytokine	1,87E-03	MMP2,TGFB1,TIMP1	136 (18)
IL17A	cytokine	8,95E-06	C3,COL1A1,HEXB,LOX,MMP1,MMP2,MMP3,NRP1,TIMP1,TIMP2,YWHAG	144 (21)
IL2	cytokine	1,07E-03	ARHGDIA,C3,ENPP2,GAPDH,GARS,HSP90B1,HSPA5,HSPD1,MMP2,PDIA3,TGFB1,TIMP1,TPI1,VIM	138 (15)
TNF	cytokine	8,65E-24	AEBP1,ALB,ANPEP,ANXA1,APOE,APP,B4GALT1,BGN,C3,CCDC80,CLEC11A,CLU,COL1A1,COL1A2,COL3A1,DCN,ENPP2,EXT1,FN1,FSCN1,GNAI2,HEXA,HEXB,HSP90AB1,HSPA8,HSPD1,HSPG2,IGFBP3,IGFBP4,IGFBP6,INHBA,LAMA4,LAMC1,LDHA,LOX,LTBP2,MMP1,MMP2,MMP3,MVP,MYH9,NID1,NRP1,NUCB2,P4HB,PAPPA,PDIA4,POSTN,PTX3,RCN3,RPSA,SERPINE1,SERPINE2,SERPINF1,SND1,SOD3,SPARC,TAGLN,TALDO1,TGFB1,THBS1,THBS2,TIMP1,TIMP2,TP53I3,VCL,VIM,YWHAG	117 (16)
IL32	cytokine	1,19E-02	MMP2,MMP3,VIM
IL1A	cytokine	3,56E-06	APP,HSPG2,INHBA,LDHA,LOX,MMP1,MMP2,MMP3,PTX3,SERPINE1,SPARC,TGFB1	142 (17)
CCL25	cytokine	3,20E-02	MMP1
IL13	cytokine	5,12E-13	C3,COL1A1,COL1A2,COL3A1,COL6A2,ENPP2,EZR,GNAI2,HK1,HTRA1,KRT16,LTBP1,MMP1,MMP2,MMP3,NID1,POSTN,QSOX1,SEPT11,SERPINE1,SERPINF1,TGFB1,THBS1,TIMP1,TIMP2	101 (19)
IFNB1	cytokine	3,60E-05	ANXA5,CLSTN1,FBLN2,FBN1,LAMB1,MMP2,NID2,THBS1,THBS2,TIMP1,TIMP2,VCL	71 (10)
TIMP1	cytokine	2,54E-04	IGFBP3,MMP2,MMP3,TIMP2	84 (11)
IL15	cytokine	4,26E-05	ACTN4,ANXA1,GAPDH,GARS,GDI2,HMCN1,HNRNPA2B1,HSPA8,PDIA3,PDIA4,PFN1,PRDX4,PSMA5,TIMP1	70 (6)
IFNG	cytokine	7,72E-10	A2M,ACLY,APP,C3,COL1A1,COL1A2,COL5A2,EEF1A1,FBLN1,FN1,GNAI2,HSP90AA1,HSP90AB1,HSPA8,HSPB1,HSPD1,HSPG2,HTRA1,IGFBP4,INHBA,LAMB2,LAMC1,LGALS3BP,LOX,MMP1,MMP2,MMP3,MYH9,PAPPA,PPIA,PRDX2,PTX3,SEMA7A,SERPINA5,SERPINE1,SERPINH1,SOD3,TGFB1,THBS1,TIMP1	138 (19)
MIF	cytokine	1,09E-04	COL1A1,MMP1,MMP2,MMP3,TGFB1,TIMP1	111 (16)
TNFSF10	cytokine	1,58E-02	MMP2,MMP3,SERPINH1,TIMP1
EPO	cytokine	3,44E-02	CLIC1,EEF1A1,KPNB1,MMP2,NPM1,SPTAN1,TPI1
EDN1	cytokine	7,91E-20	ANXA1,ANXA5,ANXA6,COL1A2,COL5A1,COMP,CST3,EZR,FN1,HSPA5,HSPA8,MMP1,MMP2,MMP3,MSN,NPM1,PDIA6,PLOD1,RPSA,SERPINE1,THBS1,TIMP1,TPM4,VCL,VIM	101 (16)
IL6	cytokine	5,38E-10	A2M,ALB,ANPEP,ANXA1,APOE,APP,BGN,C3,CLU,COL1A1,COL3A1,CST3,DCN,ENPP2,FN1,FSCN1,HSPA5,IGFBP3,IGFBP4,IGFBP6,MMP1,MMP2,MMP3,NUCB2,SERPINE1,TGFB1,THBS1,TIMP1,VIM	144 (19)
OSM	cytokine	1,35E-08	A2M,ALB,ANXA1,ANXA2,C1S,COL3A1,COL6A1,ECM1,FN1,HSPA5,IGFBP6,KRT16,KRT2,KRT9,MMP1,MMP2,MMP3,PGK1,PRDX2,QSOX1,SERPINE1,TIMP1,TUBA1A	103 (19)
IL1B	cytokine	1,25E-14	A2M,ANXA1,APOE,APP,BGN,C3,COL1A1,DCN,ENPP2,FN1,HEXA,HEXB,HSPB1,HSPG2,IGFBP3,IGFBP4,IGFBP6,INHBA,LDHA,LOX,MMP1,MMP2,MMP3,NRP1,P4HB,PAPPA,PGAM1,POSTN,PTX3,RPSA,SERPINE1,SERPINH1,SPARC,TGFB1,THBS1,TIMP1,TIMP2,UGDH,VIM	139 (19)
PPBP	cytokine	5,98E-03	COL6A3,SERPINE1
IL17F	cytokine	3,33E-03	MMP1,MMP3,TGFB1	100 (16)
SCGB1A1	cytokine	1,26E-02	C3,FN1
WNT3A	cytokine	3,01E-03	BGN,CLEC11A,COL1A1,DCN,FN1,SPARC,THBS1,TUBB3	122 (15)
IL19	cytokine	1,42E-02	FN1,MMP1
PI3K (complex)	complex	1,08E-05	CCT6A,COL1A1,FN1,HK1,LASP1,LTBP2,MMP1,MMP2,POSTN,PRDX2,SERPINE1,THBS1,TUBB3	112 (18)
TCR	complex	1,51E-02	HSP90B1,HSPA5,HSPD1,NRP1,P4HB,PDIA4,PGK1,TGFB1
RNA polymerase II	complex	1,83E-03	COL1A2,ENO1,GAPDH,IGFBP3,MMP2,RPL12,TGFB1,THBS2,TLN1
calpain	complex	2,74E-02	APP,HSPA5
CD3	complex	6,77E-11	ACTN4,ANXA1,GAPDH,GDI2,HIST1H2AC,HMCN1,HNRNPA1,HNRNPA2B1,HSP90AA1,HSP90B1,HSPA5,HSPA8,IGFBP6,LTBP1,MDH2,MMP2,NPM1,P4HB,PDIA4,PFN1,PGAM1,PLEC,PRDX4,PSMA5,RPS14,SRSF1,TGFB1,THBS1,XRCC6
Fibrin	complex	1,64E-03	FN1,SERPINE1,TAGLN	123 (15)
F Actin	complex	3,20E-02	MMP2
TFIIH	complex	3,20E-02	COL6A1
Pdgf (complex)	complex	8,87E-06	FN1,INHBA,MMP1,MMP2,SERPINE1,SPARC,TGFB1,TIMP1	87 (13)
PDGF-AA	complex	2,74E-02	TGFB1,VIM
Stat1-Stat3	complex	3,20E-02	A2M
NfkB1-RelA	complex	3,18E-02	MMP1,MMP3
PDGF BB	complex	3,06E-10	C3,COL3A1,DCN,FN1,IGFBP4,INHBA,LAMB2,LMNA,MMP1,MMP2,MMP3,PCOLCE,POSTN,RPS14,SERPINE1,TAGLN,TGFB1,THBS1,TIMP1,UGDH	114 (17)
Pdgfra-Pdgfrb	complex	2,15E-02	TIMP1
Smad2/3-Smad4	complex	2,82E-05	COL1A1,COL1A2,IGFBP3,SERPINE1
Ap1	complex	7,05E-08	CLU,EZR,FN1,HSP90B1,IGFBP3,MMP1,MMP2,MMP3,SERPINE1,SPARC,TGFB1,TIMP1	102 (16)
AMPK	complex	2,96E-02	FSCN1,LDHB,SERPINE1,VIM
NFkB (complex)	complex	6,70E-06	A2M,APOE,APP,B4GALT1,C3,CLU,COL1A2,FN1,HSPB1,MMP1,MMP2,MMP3,PTX3,SERPINE1,SOD3,TGFB1,TIMP1,TIMP2,VIM,XRCC6	115 (18)
LDL	complex	9,73E-06	APOE,C3,HSP90B1,HSPA5,IGFBP3,IGFBP4,LASP1,MMP1,MMP2,MMP3,SERPINE1,TGFB1	149 (20)
Smad	complex	2,39E-03	COL1A1,COL1A2,SERPINE1	25 (6)
IgG	complex	2,83E-08	APOE,APP,C3,COL3A1,EZR,FN1,HSPA5,HSPB1,KRT10,KRT16,PLS3,SERPINE1,TGFB1	109 (18)
FSH	complex	4,63E-08	ACTN1,ACTR2,CLEC11A,EZR,FLNC,IGFBP3,IGFBP4,INHBA,LOX,MMP2,PGK1,PKM,SERPINE1,THBS1,TIMP1,TIMP2,TLN1,TUBA1A,VCL	117 (20)
Integrin alpha V beta 3	complex	1,08E-02	MMP1
IL17R	complex	1,58E-02	MMP1,TIMP1
STAT1/3/5 dimer	complex	7,12E-03	MMP1,MMP3
lymphotoxin-alpha1-beta2	complex	9,68E-03	MMP1,MMP3	72 (7)
Collagen(s)	complex	1,39E-03	C3,FN1,SERPINH1,THBS1	28 (5)
Integrin alpha 3 beta 1	complex	3,20E-02	MMP2
Laminin	complex	2,57E-07	APP,COL1A1,FN1,MMP1,RPSA,SERPINE1,VIM	147 (22)
Eif2	complex	3,20E-02	HSPA5
Cg	complex	5,90E-06	CLU,EFEMP1,ENPP2,GPC1,IGFBP3,IGFBP4,INHBA,LGALS3BP,MMP1,MMP2,NRP1,NUCB2,PAPPA,PTX3,TIMP1	149 (21)
Collagen type I	complex	1,62E-09	APOE,APP,COL1A1,FN1,MMP1,MMP2,MMP3,TGFB1,TIMP2,VIM	125 (20)
Lh	complex	1,67E-05	ACTN1,ACTR2,EZR,FLNC,MMP2,PGK1,PTX3,THBS1,THBS2,TLN1,TUBA1A,VCL	81 (10)
VLDL	complex	4,25E-02	SERPINE1
Immunoglobulin	complex	4,12E-03	ANPEP,APP,DPYSL2,EXT1,INHBA,MMP2,PDIA6,TIMP1	139 (16)
Collagen type IV	complex	2,48E-06	MMP2,SERPINE1,TAGLN,THBS1,TIMP2	87 (12)
3-methyladenine	chemical toxicant	3,89E-02	HSP90B1,HSPA5
isobutylmethylxanthine	chemical toxicant	1,44E-04	AEBP1,GAPDH,MMP2,MMP3,SERPINE1,TGFB1,TIMP1,TIMP2	116 (20)
pirinixic acid	chemical toxicant	1,46E-06	AHSG,ANXA2,APOE,C3,CCT6A,CCT7,CLU,COL1A1,GAPDH,HSP90AA1,HSPB1,HSPD1,LDHB,PSMA5,PSMB5,PSMB6,SERPINE1,TALDO1	132 (15)
bucladesine	chemical toxicant	3,84E-04	ANXA1,APOE,CLU,IGFBP3,IGFBP6,MMP1,MMP2,QSOX1,SERPINE1,TIMP1,TIMP2	86 (14)
tert-butyl hydroperoxide	chemical toxicant	4,13E-04	CLU,FN1,TGFB1	126 (14)
nitrofen	chemical toxicant	7,92E-03	ENO1,HK1,TIMP2
2,2,2-trichloroethanol	chemical toxicant	2,15E-02	TIMP1
trichloroethylene	chemical toxicant	1,97E-07	ANPEP,COL1A1,COL3A1,IGFBP3,MFGE8,PLS3,SPARC,YWHAQ
dichlorvos	chemical toxicant	1,08E-02	PPIA
hexachlorobenzene	chemical toxicant	1,71E-07	A2M,ANXA1,ANXA2,CLU,MMP2,RCN1,TIMP1,VIM	46 (5)
cigarette smoke	chemical toxicant	9,24E-09	C3,COL4A2,HSP90AA1,HSPA5,MMP1,MMP2,MMP3,PGD,PRDX1,SERPINE1,SOD3,TCP1,TGFB1,TIMP1,UGDH	104 (15)
ristocetin	chemical toxicant	2,15E-02	YWHAZ
reactive oxygen species	chemical toxicant	1,79E-03	HSPA5,MMP1,MMP3,PRDX3,SERPINE1,TGFB1	106 (19)
paraquat	chemical toxicant	2,16E-04	COL1A1,FN1,INHBA,MMP1,MMP3,SOD3,TIMP1	91 (17)
dimethylnitrosamine	chemical toxicant	8,49E-06	COL1A1,COL1A2,COL3A1,TGFB1,TIMP1,VIM	171 (18)
methylnitronitrosoguanidine	chemical toxicant	3,89E-02	SERPINE1,TP53I3
methylmercury	chemical toxicant	5,48E-07	ANPEP,COL1A1,COL3A1,IGFBP3,MFGE8,PLS3,SPARC,YWHAQ	90 (13)
coumestrol	chemical toxicant	3,11E-03	HSP90AB1,HSP90B1
cytochalasin B	chemical toxicant	3,97E-03	MMP1,MMP2	121 (22)
Congo Red	chemical toxicant	1,69E-03	APP,C3
methoxychlor	chemical toxicant	3,11E-03	HSP90AB1,HSP90B1
3-nitropropionic acid	chemical toxicant	2,64E-04	APP,GAPDH,LDHA,LDHB,TPI1	127 (7)
rotenone	chemical toxicant	2,05E-02	MMP1,TIMP1,TIMP2
ochratoxin A	chemical toxicant	2,95E-02	COL3A1,TIMP1
okadaic acid	chemical toxicant	2,53E-03	ANXA1,APP,GNAI2,MMP1,MMP3	131 (18)
aphidicolin	chemical toxicant	8,36E-03	MMP1,MMP3	124 (12)
4-methylnitrosoamino-1-(3-pyridinyl)-1-butanone	chemical toxicant	3,31E-04	ANXA1,LOX,TKT,TP53I3
n-nitrosomethylbenzylamine	chemical toxicant	3,90E-03	ACTN4,ACTR2,ANXA2,HSP90AA1,MSN,PLS3
chlordecone	chemical toxicant	3,20E-02	HSPA5
mono-(2-ethylhexyl)phthalate	chemical toxicant	1,77E-06	ATP5B,ENO1,GAPDH,MDH1,MDH2,PGK1,TALDO1,TIMP2,TKT,TPI1,VCL
dinophysistoxin 1	chemical toxicant	2,15E-02	TUBB3
thioacetamide	chemical toxicant	3,51E-15	ANXA1,ANXA2,BGN,CLU,COL1A1,COL1A2,COL3A1,FBN1,FSTL1,HK1,IGFBP3,LGALS3BP,LOX,LTBP1,MMP2,PCOLCE,PKM,RCN1,SPARC,TAGLN,TGFB1,TIMP1,TIMP2	156 (11)
chrysotile asbestos	chemical toxicant	2,95E-02	MMP3,TIMP1
p-dimethylaminoazobenzene	chemical toxicant	2,15E-02	ALB
malondialdehyde	chemical toxicant	1,69E-03	COL1A1,TGFB1
methylnitrosourea	chemical toxicant	4,88E-03	CLU,GNAI2,TIMP2
benzo(a)pyrene	chemical toxicant	1,38E-07	ANXA1,ARHGDIA,GNAI2,GPC1,HSPB1,IGFBP6,INHBA,MMP1,PGD,SERPINE1,SOD3,TGFB1,THBS1,TKT	101 (14)
carbon tetrachloride	chemical toxicant	2,58E-07	APOE,COL1A1,COL1A2,COL3A1,FN1,HSP90AA1,HSPB1,HSPD1,IGFBP6,MMP2,TGFB1,TIMP1,TIMP2	102 (16)
rottlerin	chemical toxicant	9,67E-03	COL1A1,COL3A1,MMP2,PRDX1	107 (18)
sodium arsenate	chemical toxicant	2,15E-02	PRDX1
cadmium chloride	chemical toxicant	1,05E-06	ALB,ANXA5,EEF1D,HSP90AA1,HSPA5,HSPB1,IGFBP6
4-hydroxynonenal	chemical toxicant	4,88E-03	APP,SERPINE1,TGFB1	108 (17)
benzene	chemical toxicant	1,97E-07	ANPEP,COL1A1,COL3A1,IGFBP3,MFGE8,PLS3,SPARC,YWHAQ
bromobenzene	chemical toxicant	8,68E-07	ACTN4,GAPDH,HSP90AA1,HSPA5,HSPB1,TIMP1,TUBA1A,YWHAQ
hexarelin	chemical toxicant	3,97E-03	ATP5B,TIMP1
Sn50 peptide	chemical toxicant	3,78E-03	APOE,GNAI2,MMP2,SERPINE1	132 (11)
microcystin-LR	chemical toxicant	4,25E-02	MMP2
salvin	chemical toxicant	1,94E-02	MMP1,MMP3
thapsigargin	chemical toxicant	9,55E-05	AHSG,CLU,COL1A1,FN1,HSP90B1,HSPA5,SRI,VCL,VIM	125 (17)
forskolin	chemical toxicant	2,69E-09	ACTN1,ACTR2,ALDOA,APP,B4GALT1,CLU,COL1A1,ECM1,EZR,FLNC,FN1,IGFBP3,IGFBP6,INHBA,MFGE8,MMP3,NT5E,PGK1,PRDX1,PRDX2,SERPINE1,TAGLN2,THBS1,TIMP1,TUBA1A,VCL,VIM	133 (17)
deoxynivalenol	chemical toxicant	3,89E-02	FBN1,HSPA5
kaempferol	chemical toxicant	2,95E-02	MMP1,MMP2
caffeic acid phenethyl ester	chemical toxicant	1,07E-04	GNAI2,HSPB1,IGFBP6,MMP2,TCP1,TGFB1,VIM	98 (14)
6-hydroxydopamine	chemical toxicant	1,15E-09	C3,HSP90AB1,HSPA5,HSPA8,MMP3,P4HB,PDIA3,PPIB,PSMB2,TIMP2,VCP
arsenic	chemical toxicant	3,41E-02	HSP90AA1,KRT1
dichlorovinylcysteine	chemical toxicant	3,68E-03	ENO1,MDH2,PKM
ethionine	chemical toxicant	8,51E-03	ANXA1,CLU,TIMP1
ethidium	chemical toxicant	2,17E-05	MMP1,SERPINE1,TIMP1,TIMP2	100 (13)
arsenite	chemical toxicant	1,73E-05	GPC1,HSPB1,INHBA,MMP1,RNH1,SERPINE1,TGFB1,THBS1	105 (17)
cobalt	chemical toxicant	1,11E-02	LDHA,PGK1
nickel	chemical toxicant	2,13E-02	GAPDH,SERPINE1
cadmium	chemical toxicant	1,38E-04	ALB,C3,HSPA5,LOX,SERPINF1,TIMP1
ATP-gamma-S	chemical reagent	7,86E-04	C3,CD109,NRP1,PRDX2,THBS1
8-bromo-cyclic ADP-ribose	chemical reagent	1,08E-02	TGFB1
5-N-ethylcarboxamido adenosine	chemical reagent	1,50E-05	ALB,COL1A2,INHBA,NRP1,NT5E,SERPINE1,TGFB1,THBS1	74 (14)
2-chloroadenosine	chemical reagent	6,67E-05	MMP2,TGFB1,TIMP1	113 (9)
D-2-amino-5-phosphonovaleric acid	chemical reagent	4,25E-02	APP
8-bromo-cAMP	chemical reagent	2,99E-06	APP,CLEC11A,CLU,DCN,GNAI2,LOX,MMP1,NRP1,SERPINE1,TIMP1,TIMP2	148 (22)
6-amino-4-(4-phenoxyphenylethylamino)quinazoline	chemical reagent	3,11E-03	APOE,C3	76 (9)
Diphtheria Toxin	chemical reagent	1,26E-02	COL1A2,COL3A1
polyglactin 910	chemical reagent	1,08E-02	MMP2
T 0070907	chemical reagent	5,98E-03	COL1A1,COL1A2	57 (7)
N6-methyl-(R)-roscovitine	chemical reagent	1,08E-02	APP
2-bromoethylamine	chemical reagent	1,41E-05	A2M,ANXA1,ANXA2,CLU,TIMP1,VIM
2-[[4-[(e)-styryl]phenoxy]methyl]oxirane	chemical reagent	4,25E-02	APOE
BTA-EG4	chemical reagent	1,08E-02	APP
3-(p-methoxy)phenyl-1,4-benzoxazine	chemical reagent	1,16E-04	COL1A1,MMP1
BR-4628	chemical reagent	2,15E-02	LOX
DPP-23	chemical reagent	1,06E-03	ERO1A,HSP90AA1,HSPA5
TO-901317	chemical reagent	6,54E-06	ACLY,ALB,APOE,APP,C3,ENO1,IGFBP4,PSMA5,PSMB2,TGFB1,TIMP1,TKT	102 (17)
thenoyltrifluoroacetone	chemical reagent	2,35E-03	SERPINE1,TGFB1	91 (14)
azetidyl-2-carboxylic acid	chemical reagent	6,11E-06	CLU,HSP90B1,HSPA5,HSPA8
diphenyleneiodonium	chemical reagent	3,14E-04	COL1A1,FN1,SERPINE1,THBS2,TIMP1	130 (17)
A23187	chemical reagent	6,60E-03	FN1,HSP90B1,HSPA5,INHBA,SERPINE1	127 (22)
BAPTA-AM	chemical reagent	9,77E-03	COL1A1,FN1,MMP2	114 (17)
epalrestat	chemical reagent	3,20E-02	TGFB1
hexamethylene bisacetamide	chemical reagent	7,31E-04	FN1,HSPA8,NPM1,TCP1
dithiothreitol	chemical reagent	3,41E-02	HSP90B1,HSPA5
NS-398	chemical reagent	2,05E-03	COL1A2,MMP2,PRDX1,PSMB5,XRCC6	72 (7)
cycloheximide	chemical reagent	5,36E-11	ALB,ALDOA,APP,COL1A1,COL5A1,EEF1A1,EEF1D,FN1,GNAI2,HEXA,IGFBP4,IGFBP6,LDHA,MMP1,MMP2,NPM1,PGK1,PTX3,SERPINE1,TGFB1,THBS1,TIMP1	136 (17)
phenyl-N-tert-butylnitrone	chemical reagent	3,97E-03	FN1,TGFB1	100 (15)
cibacron blue F 3GA	chemical reagent	3,20E-02	THBS1
1,2-dithiol-3-thione	chemical reagent	1,16E-14	ACTG1,ALDOA,CCT7,HSP90AA1,HSP90AB1,HSP90B1,LMNA,NUCB2,PCBP1,PDIA3,PDIA4,PDIA6,PPIB,PRDX1,PSMA5,PSMB2,PSMB5,PSMB6,SEC23A,TPI1,VCP	30 (2)
fenamic acid	chemical reagent	9,53E-06	A2M,ANXA1,ANXA2,CLU,RCN1,TIMP1,VIM
RS86	chemical reagent	1,08E-02	APP
manumycin A	chemical reagent	5,98E-03	ANPEP,FN1	70 (7)
methylselenic acid	chemical reagent	1,64E-03	ACTN4,B4GALT1,CLU,DPYSL2,FN1,HSP90B1,PDIA4,TUBB4B,UGDH
GW9662	chemical reagent	2,17E-03	ACLY,APP,FN1,HSPA5,TGFB1	73 (11)
SB-431542	chemical reagent	2,98E-05	BGN,COL1A1,FN1,IGFBP7,MMP2,SERPINE1,TGFB1	119 (15)
synthetic peptide	chemical reagent	1,08E-02	SPARC
pyrrolidine dithiocarbamate	chemical reagent	1,45E-04	ANXA1,COL1A1,GNAI2,MMP1,MMP2,PGK1,SERPINE1	107 (16)
tiron	chemical reagent	3,97E-03	HSPA5,PRDX2
tert-butyl-hydroquinone	chemical reagent	1,65E-03	EMILIN1,GNAI2,HSPA5,HSPA8,SERPINE1	48 (7)
sodium orthovanadate	chemical reagent	4,39E-02	COL1A1,SERPINE1
cobalt chloride	chemical reagent	1,15E-05	ALDOA,ANPEP,CLU,HSP90AB1,PGK1,PKM,SERPINF1
potassium cyanide	chemical reagent	1,24E-06	MMP1,TIMP1,TIMP2
DETA-NONOate	chemical reagent	1,82E-04	BGN,LOXL2,SERPINE1,SOD3,TIMP1	135 (20)
Mn(III)-tetrakis-(4-benzoic acid) porphyrin	chemical reagent	9,68E-03	SERPINE1,TGFB1	103 (18)
trinitrobenzenesulfonic acid	chemical reagent	5,92E-06	COL1A1,COL1A2,COL3A1,LUM,MMP3,PTX3,TGFB1,TIMP1	129 (13)
N-formyl-Met-Leu-Phe	chemical reagent	1,04E-02	ACTN1,MSN,TAGLN2
calpeptin	chemical reagent	1,11E-02	APP,VIM
farnesol	chemical reagent	1,23E-03	HSP90B1,HSPA5,PDIA4
ionomycin	chemical reagent	3,66E-02	HSPA5,LDHA,NRP1,SLC3A2,TGFB1
N-acetylsphingosine	chemical reagent	1,08E-04	COL1A1,COL1A2,COL3A1,MMP1,SERPINE1	113 (19)
N-methyl-D-aspartate	chemical reagent	1,26E-02	APP,C3,HSPA5
5-thio-D-glucose	chemical reagent	2,15E-02	TGFB1
bufalin	chemical reagent	1,35E-05	HSPA5,MMP2,YWHAG,YWHAQ,YWHAZ
metribolone	chemical reagent	9,86E-06	ACLY,ACTN1,APP,CCT2,CLU,MMP1,MMP2,PPIB,THBS1,TIMP2,UGDH	168 (17)
U73122	chemical reagent	1,11E-02	FN1,HSPA5,MMP2
tributyrin	chemical drug	3,32E-02	HSPA5,INHBA,MYL12A
beraprost	chemical drug	1,41E-04	COL1A1,COL3A1,FN1
cloprostenol	chemical drug	4,25E-02	TIMP1
3-deazaneplanocin	chemical drug	2,05E-02	IGFBP3,MVP,TGFB1
bromodeoxyuridine	chemical drug	2,64E-04	IGFBP3,IGFBP4,INHBA,SERPINE1,TGFBI	127 (7)
allopurinol	chemical drug	3,49E-05	A2M,ANXA1,ANXA2,CLU,RCN1,TIMP1,VIM	73 (7)
5-fluorouracil	chemical drug	2,05E-19	ALDOA,ANXA2,ATP5B,CALU,CCT4,CCT6A,CLU,COL1A2,EEF1G,EEF2,EIF4A1,GAPDH,GARS,HNRNPA1,HNRNPA2B1,HSP90AB1,HSPA8,LDHA,MDH1,MVP,PCBP1,PGK1,PSMB2,PSMB5,THBS1,TPI1
moxonidine	chemical drug	9,68E-03	ANPEP,TGFB1
bosentan	chemical drug	1,64E-03	COL1A2,EZR,MSN	65 (7)
dextran sulfate	chemical drug	2,84E-03	C3,MMP2,NRP1,SERPINE1,SPON2,THBS1,THBS2,TIMP2	144 (20)
streptozocin	chemical drug	6,52E-08	ALB,CLU,COL1A1,COL3A1,FBN1,FN1,HSPD1,HSPG2,MMP2,NT5E,SERPINE1,SOD3,TGFB1,VIM	174 (20)
etoposide	chemical drug	2,60E-02	COL1A2,EEF1A1,HK1,MMP1,TP53I3
calcipotriene	chemical drug	1,42E-02	KRT10,KRT16
estradiol benzoate	chemical drug	6,27E-03	C3,HSPA8,PDIA3,TGFB1
corticosteroid	chemical drug	9,13E-03	CST3,MMP1,POSTN
glucocorticoid	chemical drug	2,48E-05	ANXA1,CLEC11A,CLU,COL1A1,FBLN1,FBLN2,FN1,IGFBP3,KRT5,MMP3,SERPINE1,TGFB1	101 (15)
nilotinib	chemical drug	1,22E-05	COL1A1,COL1A2,FN1
prednisolone	chemical drug	4,01E-05	APOE,APP,HSP90AA1,HSPA8,MYH9,PGK1,PRDX1,PRDX2,SOD3,SPON2,TGFB1	76 (7)
dexamethasone	chemical drug	4,46E-22	ACTG1,AEBP1,ALB,ANXA1,APOE,APP,ARHGDIA,BGN,BMP1,C3,CFL1,CLEC11A,CLIC1,COL1A1,COL4A2,COL6A1,COL6A2,CST3,DCN,EEF1A1,EZR,FBLN1,FBLN2,FBN2,FN1,GAPDH,GNAI2,HSPA5,HSPA8,IGFBP3,IGFBP4,IGFBP6,INHBA,KPNB1,LAMA2,LAMA4,LAMB2,LAMC1,LDHA,LGALS3BP,LTBP2,MFGE8,MMP1,MMP2,MMP3,NPM1,NUCB2,PLEC,PLOD1,PLOD3,POSTN,PTX3,SERPINE1,SERPINE2,SERPINF1,SPARC,SPOCK1,SPTBN1,TAGLN,TGFB1,TGFBI,THBS1,TIMP1,TIMP2,VCL,VCP	174 (19)
fluticasone	chemical drug	7,29E-09	BGN,C3,DCN,FSCN1,HTRA1,MFGE8,OLFML3,PCOLCE2,SERPINE1,SERPINF1,SRPX,TGFB1,THBS1,TIMP1
deoxycorticosterone acetate	chemical drug	2,74E-02	COL3A1,TGFB1
dasatinib	chemical drug	6,26E-04	COL1A1,COL1A2,FN1	95 (12)
aliskiren	chemical drug	3,20E-02	FN1
S-18886	chemical drug	4,25E-02	TGFB1
arundic acid	chemical drug	3,20E-02	APP
ladostigil	chemical drug	8,36E-03	APP,YWHAG
benfotiamine	chemical drug	3,20E-02	TKT
methapyrilene	chemical drug	3,82E-09	A2M,ACTG1,ALB,ALDOA,ANXA2,ANXA5,APOE,CST3,EEF1A1,ENPP2,HSPA5,SLC3A2,YWHAZ
vitamin E	chemical drug	2,70E-02	MMP2,SERPINE1,TGFB1
chlormethiazole	chemical drug	3,20E-02	TGFB1
artemether	chemical drug	1,08E-02	MMP2
triclosan	chemical drug	1,42E-02	COL1A1,TIMP1
obeticholic acid	chemical drug	1,64E-05	COL1A1,TGFB1,TIMP1,TIMP2	10 (2)
etretinate	chemical drug	1,13E-03	KRT1,KRT16
crizotinib	chemical drug	1,08E-02	VIM
grape seed extract	chemical drug	1,13E-05	APP,ENO1,HSPA8,HSPD1,VIM
levocetirizine	chemical drug	1,08E-02	MMP2
avobenzone	chemical drug	1,08E-02	COL1A1
BMS-690514	chemical drug	4,92E-02	HSP90AA1,HSPA8
fluoroquinolone	chemical drug	3,20E-02	MMP2
anthralin	chemical drug	4,92E-06	KRT1,KRT16,KRT2
SLV320	chemical drug	2,15E-02	COL1A1
aleplasinin	chemical drug	1,08E-02	APP
gentamicin	chemical drug	2,72E-06	CLU,EEF1A1,ENPP2,HSP90AA1,HSP90B1,HSPA5,HSPB1,IGFBP3,NPM1,PDIA4,TGFB1,TIMP1,VAT1
2-(3-chlorophenylamino)phenylacetic acid	chemical drug	3,45E-04	FN1,TGFB1
leteprinim	chemical drug	2,15E-02	TGFB1
acetylcholinesterase inhibitor	chemical drug	1,08E-02	APP
CHF 5074	chemical drug	1,08E-02	APP
oxymatrine	chemical drug	2,53E-02	FN1,TGFB1
black raspberry extract	chemical drug	1,50E-03	ACTN4,ACTR2,ANXA2,HSP90AA1,MSN,PLS3
methylamphotericin B	chemical drug	3,20E-02	TIMP1
ruxolitinib	chemical drug	2,15E-02	COL1A1
dinaciclib	chemical drug	2,15E-02	HSPA5
panobinostat	chemical drug	3,18E-02	VIM,YWHAZ
black cohosh extract	chemical drug	1,08E-02	SERPINE1
glucuronyl glucosamine glycan sulfate	chemical drug	1,24E-06	COL3A1,FN1,HSPG2
CTS-1027	chemical drug	2,15E-02	COL1A1
riociguat	chemical drug	3,45E-04	SERPINE1,TIMP1	63 (7)
lynestrenol	chemical drug	2,15E-02	APOE
crocin	chemical drug	4,25E-02	HSPA5
ponesimod	chemical drug	3,11E-03	SERPINE1,THBS1
ABC-294640	chemical drug	1,08E-02	APP
histone deacetylase inhibitor	chemical drug	4,92E-02	IGFBP3,TGFB1
farnesyltransferase inhibitor	chemical drug	4,25E-02	COL1A2
tyrosine kinase inhibitor	chemical drug	1,08E-02	FN1
p38 MAP kinase inhibitor	chemical drug	4,25E-02	COL1A1
bleomycin	chemical drug	1,15E-06	BMP1,COL1A1,COL1A2,COL3A1,FN1,MMP2,MSN,SERPINE1,TGFB1,TIMP1,TIMP2	101 (18)
porfimer sodium	chemical drug	3,11E-03	HSP90B1,HSPD1
vatalanib	chemical drug	5,98E-03	COL1A1,TIMP1	54 (7)
green tea polyphenol	chemical drug	4,75E-04	ANXA1,IGFBP3,MMP2,TGFB1	160 (16)
silibinin	chemical drug	7,84E-05	FN1,IGFBP3,MMP2,MMP3,TIMP2,VIM	155 (20)
gentamicin C	chemical drug	6,02E-05	A2M,ANXA1,ANXA2,CLU,TIMP1,VIM	32 (4)
ciprofloxacin	chemical drug	2,85E-06	ACTN1,APP,HSPD1,MFGE8,MMP2,NRP1,RPL12,RPS18,VIM
econazole	chemical drug	2,15E-02	HSPA5
ciglitazone	chemical drug	1,06E-02	APOE,FN1,MMP2,SERPINE1
candesartan	chemical drug	1,20E-04	COL1A2,COL3A1,FN1,SERPINE1,TGFB1	72 (17)
diethylstilbestrol	chemical drug	3,73E-06	C3,CLU,COMP,HSP90AB1,HSP90B1,IGFBP3,IGFBP6,INHBA,LTBP2,MFGE8,SPARC,TGFB1	88 (9)
sirolimus	chemical drug	1,34E-23	ANXA5,APP,CLIC1,COL1A1,COL1A2,EEF1A1,EEF2,EIF4A1,ENO1,FN1,FSCN1,HSP90AA1,HSP90AB1,HSP90B1,HSPA5,HSPD1,LDHA,LDHB,MMP1,MMP2,MMP3,NPM1,PGK1,PKM,POSTN,PPIA,PSMB6,RPS14,RPS18,RPSA,SERPINE1,SLC3A2,TGFB1,TIMP1,TPI1,UBA1,UBA52,VIM	152 (20)
halofuginone	chemical drug	6,00E-16	BGN,COL1A1,COL1A2,FBN1,FSTL1,HK1,IGFBP3,LGALS3BP,LOX,LTBP1,MMP2,MMP3,PCOLCE,PKM,SPARC,TAGLN,TGFB1,TIMP1,TIMP2	102 (17)
cetrorelix	chemical drug	9,68E-03	ANXA5,RPSA
doxycycline	chemical drug	5,06E-03	COL3A1,MMP1,MMP2,TIMP1	102 (17)
nedocromil sodium	chemical drug	3,97E-03	COL3A1,MMP2
carboxyamido-triazole	chemical drug	4,25E-02	MMP2
mitoxantrone	chemical drug	2,53E-02	COL1A1,COL1A2
PD 123319	chemical drug	1,91E-04	COL1A1,SERPINE1,TGFB1,TIMP1	97 (15)
cyclophosphamide	chemical drug	4,59E-02	CLU,THBS1,TIMP1
tianeptine	chemical drug	2,15E-02	DPYSL2
candesartan cilexetil	chemical drug	4,93E-03	SOD3,TGFB1
ditiocarb	chemical drug	2,15E-02	MMP1
meclofenamic acid	chemical drug	1,08E-02	APP
imatinib	chemical drug	1,99E-04	APP,COL1A1,COL3A1,FN1,MMP1,TGFB1	110 (18)
gefitinib	chemical drug	1,15E-03	C3,COL1A1,HSP90B1,HSPB1,MMP1,MMP3,TIMP2	140 (24)
carvedilol	chemical drug	1,94E-02	MMP2,TIMP2
tamoxifen	chemical drug	1,88E-05	C3,CCDC80,CLU,GAPDH,HSP90AB1,HSP90B1,IGFBP3,IGFBP4,LTBP2,MMP1,PFN1,TAGLN	136 (15)
BMS-275183	chemical drug	1,08E-02	THBS1
enalapril	chemical drug	2,41E-04	A2M,CLU,SERPINE1,TGFB1,TIMP1	68 (11)
resiquimod	chemical drug	7,23E-05	HSPB1,INHBA,LMNA,MSN,PKM,PRDX1,PSMB2,PTX3,YWHAB
trabectedin	chemical drug	3,18E-02	COL1A1,GNAI2
perindopril	chemical drug	1,42E-02	MMP2,TGFB1
sorafenib	chemical drug	2,53E-02	HSPA5,VIM
linsidomine	chemical drug	4,46E-03	ALB,ANXA2,MMP1
pimagedine	chemical drug	5,93E-04	ALB,LAMB1,SERPINE1,TGFB1
sarpogrelate	chemical drug	2,15E-02	SERPINE1
methiothepin	chemical drug	2,15E-02	SERPINE1
tempol	chemical drug	4,65E-02	SERPINE1,TGFB1
phenethyl isothiocyanate	chemical drug	1,08E-03	CCT4,EEF2,HSP90AA1,MMP2,PLS3,QSOX1
dalfampridine	chemical drug	4,65E-02	APP,HSPA8
sibutramine	chemical drug	2,15E-02	SERPINE1
rosiglitazone	chemical drug	1,22E-05	AHSG,APOE,C3,COL1A1,FN1,GAPDH,HSPA5,IGFBP6,LOX,MDH2,POSTN,SERPINE1,SERPINF1,SPON2,THBS1,TIMP1	105 (21)
methimazole	chemical drug	5,32E-04	IGFBP3,IGFBP4,NRP1,PRDX1
celecoxib	chemical drug	3,91E-02	APP,HSPA5,MMP2,SERPINE1
methacholine	chemical drug	3,20E-02	FN1
raloxifene	chemical drug	2,67E-06	CLU,ENPP2,IGFBP4,LAMB1,LAMB2,LUM,MMP2,MMP3,PXDN,SERPINE1,TIMP1	105 (14)
GW501516	chemical drug	4,60E-03	COL5A1,COL6A1,IGFBP3,IGFBP6,THBS1
acetaminophen	chemical drug	4,93E-06	A2M,ACTG1,ALB,HSPA5,HSPD1,IGFBP3,PRDX1,SERPINF1,TUBA1A,YWHAZ
tranilast	chemical drug	1,58E-02	NRP1,TGFB1
tanespimycin	chemical drug	3,71E-08	EIF4A1,HNRNPA1,HNRNPA2B1,HSP90AB1,HSP90B1,HSPA5,HSPA8,LDHA,PRDX3,SERPINE1,SERPINH1	76 (8)
bortezomib	chemical drug	6,30E-04	HSP90AA1,HSPA5,IGFBP3,PSMA5,PSMB2,PSMB5,PSMB6,TGFB1,VIM	108 (7)
diflunisal	chemical drug	1,08E-02	APP
ibuprofen	chemical drug	7,35E-03	APP,MMP1,MMP2	123 (14)
metformin	chemical drug	3,77E-03	AHSG,FN1,HSPA5,SERPINE1,SERPINF1,TGFB1	109 (18)
emricasan	chemical drug	1,69E-03	COL1A1,TGFB1
phenylbutazone	chemical drug	3,71E-06	A2M,ANXA1,ANXA2,CLU,RCN1,TIMP1,VIM	118 (10)
indomethacin	chemical drug	3,42E-07	A2M,ANXA1,ANXA2,APP,CLU,LOXL2,MMP1,MMP2,P4HB,PSMB5,RCN1,TIMP1,VIM,XRCC6	141 (18)
bicalutamide	chemical drug	8,51E-03	CLU,MMP2,VIM	156 (16)
trichostatin A	chemical drug	5,38E-08	ANXA6,APOE,CLU,COL1A2,COL6A3,ENPP2,EZR,FBLN1,GNAI2,IGFBP3,LAMA2,MMP1,MMP3,NRP1,PSG5,PSMB2,SRSF1,TAGLN,TGFB1,THBS1,TIMP1,TIMP2,VIM	133 (19)
amphetamine	chemical drug	2,40E-03	EZR,HSPA8,INHBA,RDX,TLN1
nafoxidine	chemical drug	1,08E-02	C3
sulforafan	chemical drug	4,33E-02	PSMB5,TALDO1,TKT,VIM
triflusal	chemical drug	1,76E-02	APP,TGFB1
docetaxel	chemical drug	2,22E-03	THBS1,TUBB3,TUBB4B,YWHAZ
deferoxamine	chemical drug	2,68E-09	ALDOA,APP,ECM1,ENO1,IGFBP3,IGFBP4,LDHA,MMP1,MMP2,PGK1,PKM,SERPINE1,SERPINE2,TGFB1	146 (18)
PD 153035	chemical drug	2,13E-02	COL1A2,HSPA5
nitrofurantoin	chemical drug	2,81E-13	A2M,ACTG1,ALB,ANXA2,ANXA5,APOE,C3,CLU,CST3,EEF1A1,HSPA5,IGFBP3,LOX,PRDX1,PRDX2,TIMP1,TUBA1A,YWHAZ
irbesartan	chemical drug	2,68E-03	SERPINE1,SERPINF1,TGFB1	57 (9)
pioglitazone	chemical drug	7,69E-03	AHSG,APOE,APP,FN1,SERPINE1,TGFB1	133 (19)
dipyridamole	chemical drug	3,59E-05	MMP2,TGFB1,TIMP1,TIMP2	63 (7)
everolimus	chemical drug	2,95E-02	FSCN1,MMP2
hydroxyurea	chemical drug	2,59E-02	KRT1,KRT16,KRT2
sulindac sulfide	chemical drug	6,27E-08	APP,ARPC1B,GARS,LDHA,MMP1,PGAM1,PSG5,SPTBN1,XRCC6
plerixafor	chemical drug	1,76E-02	MMP1,MMP3
fluvoxamine	chemical drug	4,39E-02	GAPDH,GNAI2
losartan potassium	chemical drug	2,30E-08	COL1A1,COL3A1,CST3,FN1,HSPA5,MMP2,POSTN,SERPINE1,TGFB1,TIMP1,TUBB3	90 (18)
rifampin	chemical drug	2,24E-02	BMP1,CFL1,COL6A1,ENPP2,PLEC
talarozole	chemical drug	2,15E-02	KRT10
liarozole	chemical drug	4,25E-02	KRT16
nafenopin	chemical drug	7,35E-03	ATP5B,HSP90AB1,HSP90B1
Y 27632	chemical drug	2,58E-07	ACTG1,DPYSL2,MMP2,SERPINE1,TAGLN,TGFB1,THBS1,VIM	126 (20)
pirfenidone	chemical drug	7,54E-04	COL3A1,FN1,POSTN
fasudil	chemical drug	9,77E-03	MMP2,TAGLN,TGFB1	72 (9)
entinostat	chemical drug	6,02E-05	IGFBP3,MMP1,MMP2,MMP3,SERPINE1,THBS2	123 (19)
thalidomide	chemical drug	2,90E-04	APP,COL1A1,SERPINE1,TGFB1	106 (17)
methotrexate	chemical drug	2,95E-04	ACTG1,ALB,ALDOA,C3,CLEC11A,GAPDH,IGFBP3,PPIA,PRDX1,TGFB1
pinacidil	chemical drug	1,08E-02	APP
troglitazone	chemical drug	3,77E-06	ANXA2,BMP1,C3,CFL1,COL1A1,COL1A2,DCN,ERO1A,FN1,HSPA5,LAMA4,MMP3,PLEC,SERPINE1,TALDO1,TGFB1	143 (21)
captopril	chemical drug	7,98E-09	A2M,ANXA1,BGN,CLU,GNAI2,IGFBP6,LTBP2,POSTN,TGFB1,TIMP1	49 (7)
cilazapril	chemical drug	4,25E-02	COL3A1
vanoxerine	chemical drug	1,08E-02	SOD3
carboplatin	chemical drug	2,06E-03	A2M,CLU,TIMP1,VIM
hydroxyflutamide	chemical drug	1,11E-02	MSN,UGDH
sodium dodecyl sulfate	chemical drug	3,11E-03	KRT1,SERPINE2
eprosartan	chemical drug	8,34E-10	COL1A1,COL3A1,FN1,SERPINE1,TGFB1	27 (5)
vorinostat	chemical drug	2,73E-02	CLU,HSPA5,MFGE8,MMP2,VIM
paricalcitol	chemical drug	5,32E-04	COL3A1,FN1,TGFB1,TIMP1	99 (14)
trovafloxacin	chemical drug	6,27E-03	PSMA5,RDX,SERPINE1,THBS1
natamycin	chemical drug	3,20E-02	TIMP1
isoproterenol	chemical drug	3,77E-03	APP,MMP2,TGFB1,TIMP1,TIMP2,TUBB3	115 (20)
(-)-isoproterenol	chemical drug	4,25E-02	MMP2
risedronic acid	chemical drug	2,42E-05	HSPA8,HSPD1,PDIA3
clodronic acid	chemical drug	2,95E-02	MFGE8,TGFB1
cerivastatin	chemical drug	1,47E-03	COL1A1,FN1,HSPB1,SERPINE1,TGFB1	123 (21)
atorvastatin	chemical drug	5,80E-05	APOE,COL1A1,MMP2,MMP3,POSTN,SERPINE1,SOD3,TGFB1	114 (17)
simvastatin	chemical drug	2,05E-06	AHSG,ANXA1,APP,ARHGDIA,HK1,IGFBP3,MMP1,MMP2,MMP3,SERPINE1,TIMP1,VIM	98 (15)
lovastatin	chemical drug	3,91E-02	ALB,APOE,SERPINE1,TGFB1
calcitriol	chemical drug	2,28E-06	ALB,ANXA2,APP,C3,COL4A2,FBN1,FBN2,FN1,GAPDH,GNAI2,HSPD1,IGFBP3,LTBP1,MMP1,TAGLN2,TGFB1,THBS1,VCL	140 (18)
retinoid	chemical drug	1,11E-02	IGFBP3,TGFB1,TGFBI
erlotinib	chemical drug	2,70E-02	FBN1,MMP1,MMP3
2-amino-1-methyl-6-phenylimidazo-4-5-b-pyridine	chemical drug	3,20E-11	CCT2,CCT4,CCT7,CCT8,HSP90AA1,HSPA5,HSPA8,HSPD1,PSMB2,UBA1
donepezil	chemical drug	1,08E-02	APP
triamterene	chemical drug	7,07E-06	A2M,ANXA1,ANXA2,CLU,RCN1,TIMP1,VIM
bexarotene	chemical drug	2,28E-05	APOE,APP,GARS,IGFBP6,LOXL2,MMP1,SPARC,TGFB1	133 (12)
lomustine	chemical drug	5,75E-06	A2M,ANXA1,ANXA2,CLU,RCN1,TIMP1,VIM
carmustine	chemical drug	4,93E-03	HSP90AA1,HSP90AB1
phenacetin	chemical drug	5,62E-06	A2M,ANXA1,ANXA2,CLU,TIMP1,VIM	86 (5)
fingolimod	chemical drug	2,38E-03	COL3A1,FN1,SERPINE1,TGFB1	90 (16)
tetracycline	chemical drug	4,91E-02	COL1A1,HSPD1,SERPINE1
emodin	chemical drug	9,77E-03	FN1,HSPA5,VIM	138 (17)
(+)-MK-801	chemical drug	7,66E-03	ALDOA,APP,HSPA5,TIMP1	67 (7)
etodolac	chemical drug	3,20E-02	THBS1
ramipril	chemical drug	1,23E-15	COL1A1,COL1A2,COL3A1,COL4A2,FN1,LAMB1,LAMC1,MMP2,TGFB1,TIMP1,TIMP2
semaxinib	chemical drug	4,39E-02	TGFB1,THBS1
opioid	chemical drug	4,25E-02	THBS2
PK 11195	chemical drug	1,08E-02	APP
cromolyn	chemical drug	4,25E-02	APP
amlodipine	chemical drug	6,26E-04	ANXA2,COL1A1,ENO1
fenoprofen	chemical drug	2,15E-02	APP
resveratrol	chemical drug	1,09E-03	APP,FN1,HSPA5,IGFBP3,MMP1,MMP2,MMP3,PSMB5,SERPINE1,TGFB1	138 (16)
probucol	chemical drug	2,13E-02	SERPINE1,TGFB1
propofol	chemical drug	7,35E-03	ANXA1,MMP2,THBS1	87 (12)
trans-hydroxytamoxifen	chemical drug	8,84E-03	CLU,IGFBP4,LAMB1,LAMB2,PXDN
epigallocatechin-gallate	chemical drug	1,58E-04	APP,FN1,MMP1,MMP2,MMP3,PDIA4,SERPINE1,TGFB1,TIMP1,VIM	104 (15)
acetovanillone	chemical drug	4,92E-02	APP,MMP2
salirasib	chemical drug	4,20E-09	COL5A1,COL5A2,LDHA,PGAM1,PGK1,PKM,PLOD1,SERPINE1,TPI1
mycophenolate mofetil	chemical drug	3,20E-02	FN1
lithium chloride	chemical drug	1,28E-04	APP,B4GALT1,DCN,FSCN1,MMP2,POSTN,PTX3	143 (17)
zinc sulfate	chemical drug	7,12E-03	C3,COL5A1
cisplatin	chemical drug	1,08E-09	A2M,ALB,ANPEP,ANXA1,ANXA2,ANXA5,CLU,COL1A1,FN1,HK1,HSPA5,IGFBP3,KRT10,LAMB1,LDHB,LMNA,MMP2,PPIA,RCN1,SERPINE1,TGFB1,THBS1,TIMP1,TP53I3,VIM,XRCC6,YWHAZ	137 (18)
potassium chloride	chemical drug	1,30E-02	HSP90B1,HSPA5,PDIA3,PDIA4
acitretin	chemical drug	4,93E-03	APP,KRT16
acyclic retinoid	chemical drug	7,54E-04	COL1A2,COL4A2,TIMP2
CD 437	chemical drug	8,88E-14	ALDOA,ATP5B,CCT2,CCT6A,CLIC1,EEF2,EIF4A1,ENO1,FSCN1,HNRNPA1,HSP90AA1,HSPA8,NPM1,PCBP1,PDIA3,PFN1,PGAM1,TUBA1A,UBA52,YWHAZ
alitretinoin	chemical drug	2,41E-02	ANXA5,APP,FN1,MMP1,TGFB1
sertindole	chemical drug	4,25E-02	APP
trientine	chemical drug	1,18E-11	COL3A1,FN1,IGFBP3,IGFBP4,SERPINE1,SOD3,TGFB1	50 (7)
lanreotide	chemical drug	2,15E-02	IGFBP3
actinomycin D	chemical drug	1,41E-09	ALB,APP,CLEC11A,COL1A2,FN1,GAPDH,HK1,IGFBP4,MMP2,MMP3,NPM1,PAPPA,PTX3,SERPINE1,TGFB1,TP53I3	161 (21)
buserelin	chemical drug	4,25E-02	ANXA5
doxorubicin	chemical drug	4,81E-09	A2M,ALB,ANXA1,ANXA2,APP,CLU,COL3A1,EEF1A1,FBLN1,IGFBP6,IGFBP7,LGALS3BP,MMP2,MVP,PRDX1,RCN1,TGFB1,TIMP1,TP53I3,VIM	115 (17)
plicamycin	chemical drug	9,58E-06	COL1A1,COL1A2,GNAI2,IGFBP4,SEMA7A,SERPINE1,SERPINE2,TIMP1	62 (12)
andrographolide	chemical drug	4,65E-02	FN1,TIMP1
ursolic acid	chemical drug	1,42E-02	MMP1,MMP2,MMP3
zeaxanthin	chemical drug	3,45E-04	MMP2,TIMP1
bardoxolone	chemical drug	3,89E-02	MMP1,UGDH
betulinic acid	chemical drug	2,68E-03	MMP2,TIMP1,TIMP2	83 (13)
genistein	chemical drug	3,69E-04	A2M,C3,CLU,COL1A1,EXT1,HEXA,HEXB,HSPA5,MMP1,MMP2,MMP3,SERPINE1,TGFB1	114 (18)
nicotine	chemical drug	3,15E-05	ALDOA,ENO1,FN1,HSPA8,KRT10,MMP2,POSTN,RPSA,SERPINE1,SERPINF1	150 (19)
cocaine	chemical drug	1,11E-02	ATP5B,CLSTN1,GNAI2,INHBA,PRDX2,THBS1
lisofylline	chemical drug	3,20E-02	LAMB1
berberine	chemical drug	7,59E-04	FN1,MMP1,MMP2,TGFB1,TIMP1,VIM	106 (15)
topotecan	chemical drug	3,81E-03	ARPC1B,C3,ENO1,HSPA8,HSPD1,TP53I3,VCL
bromocriptine	chemical drug	8,51E-03	ANXA5,GNAI2,MMP2
(6S)-hydroxyhyoscyamine	chemical drug	3,20E-02	HSPA5
camptothecin	chemical drug	9,30E-09	ALDOA,ANXA2,APOE,ARHGDIA,EEF1A1,FSCN1,GAPDH,GNAI2,H2AFJ,IGFBP3,LAMB2,MMP1,NRP1,PLEC,PPIA,PTX3,RCN1,RDX,SERPINE1,SPTBN1,TAGLN2,TGFB1,TGFBI,TP53I3,TPM4	123 (12)
pentoxifylline	chemical drug	5,93E-04	COL1A1,POSTN,TGFB1,TIMP1	113 (20)
tiotropium	chemical drug	6,85E-04	MMP1,MMP2
ciprofibrate	chemical drug	2,12E-02	ANXA2,COL4A2,LGALS3BP,RPL12,TAGLN2
fenofibrate	chemical drug	1,67E-02	APP,CLU,GAPDH,LDHB,MAN1A1,SERPINE1,TGFB1
curcumin	chemical drug	1,01E-04	APOE,APP,CLIC1,COL1A1,COL1A2,HSP90B1,HSPA8,IGFBP4,MMP1,MMP2,MMP3,SERPINE1,VIM	91 (17)
tetrathiomolybdate	chemical drug	2,54E-04	COL1A1,SERPINE1,TIMP1
AGN194204	chemical drug	2,00E-03	ANXA2,CST3,GAPDH,LMNA,MAN1A1,SLC3A2,TIMP1
gemfibrozil	chemical drug	4,00E-02	APOE,APP,SERPINE1
valproic acid	chemical drug	1,56E-06	B4GALT1,FSCN1,GNAI2,HNRNPA1,HSPA5,MMP1,PDIA6,PSMA5,PSMB2,PSMB5,PSMB6,PTX3,SERPINE1,SERPINH1,SRSF1,TGFB1,THBS1,TUBB3	130 (16)
mycophenolic acid	chemical drug	3,77E-05	ANPEP,CLU,FN1,HSPA5,INHBA,MYL12A,SERPINE1	54 (7)
latanoprost	chemical drug	3,45E-04	MMP2,MMP3	45 (5)
eicosapentenoic acid	chemical drug	1,85E-03	APOE,FBN1,MMP1,SERPINE1,TGFB1	105 (15)
5-azacytidine	chemical drug	3,20E-09	ANXA2,ATP5B,COL1A1,HSP90B1,HSPA5,HSPA8,HSPD1,INHBA,LDHB,LOX,SLC3A2,THBS1,THBS2
decitabine	chemical drug	4,92E-14	ANXA2,APOE,CLU,COL1A1,COL1A2,COL3A1,COL6A3,EEF1A1,EEF1G,FBN2,FLNC,FN1,IGFBP3,IGFBP7,KRT16,LAMA2,LOX,LUM,MMP1,MMP2,MMP3,PXDN,SERPINH1,SPARC,TGFBI,THBS1,TIMP2,UBA1,VIM	156 (22)
valsartan	chemical drug	9,35E-09	APP,COL1A1,FN1,MMP2,POSTN,SERPINE1,TGFB1,TIMP1	102 (16)
iodixanol	chemical drug	4,25E-02	SERPINE1
N-nitro-L-arginine methyl ester	chemical drug	4,06E-05	BGN,COL1A2,COL3A1,FN1,SERPINE1,TGFB1,TIMP1	110 (18)
L-buthionine (SR)-sulfoximine	chemical drug	1,76E-02	MMP1,SERPINE1
N-acetyl-L-cysteine	chemical drug	1,35E-03	C3,COL1A1,GNAI2,HSPA5,MMP2,PRDX2,SERPINE1,TGFB1	138 (20)
eflornithine	chemical drug	6,78E-05	APP,C3,FN1,LGALS3BP,SERPINE1	124 (12)
buthionine sulfoximine	chemical drug	7,12E-03	EEF2,MMP1
lipopolysaccharide	chemical drug	1,05E-28	ACLY,ACTN4,ALB,ANXA1,ANXA5,APOE,APP,ARPC1B,BGN,C3,COL1A1,COL1A2,COL3A1,COL4A2,COL5A1,COL5A2,COL6A1,CST3,DCN,EEF2,ENO1,ENPP2,ERO1A,FBLN2,FBN1,FN1,FSCN1,GDI2,HSP90B1,HSPA5,HSPA8,HSPB1,HTRA1,IGFBP3,IGFBP4,INHBA,LAMB1,LASP1,LGALS3BP,MDH1,MMP1,MMP2,MMP3,MSN,MYH9,NID1,NID2,NRP1,P4HB,PCOLCE,PCOLCE2,PDIA3,PDIA4,PPIA,PRDX1,PTX3,SERPINC1,SERPINE1,SERPINE2,SERPINF1,SERPINH1,SLC3A2,SPARC,TALDO1,TGFB1,THBS1,T…	156 (20)
dextran	chemical drug	4,93E-03	APOE,SERPINC1
2-deoxyglucose	chemical drug	3,55E-03	APP,HSP90B1,HSPA5,PDIA3	62 (9)
phorbol myristate acetate	chemical drug	9,32E-07	ALB,ANXA1,APP,C3,EEF1D,EIF4A1,GNAI2,HSP90AB1,HSPA5,IGFBP3,IGFBP6,INHBA,KRT10,LOXL2,MMP1,MMP2,MMP3,MYH9,NPM1,NRP1,PKM,PRDX1,SERPINE1,SPARC,TGFB1,THBS1,TIMP1,VCL,VIM	142 (18)
hydrocortisone phosphate	chemical drug	1,08E-02	APOE
medroxyprogesterone acetate	chemical drug	2,49E-03	DCN,FN1,HTRA1,LMNA,MMP1,TGFB1	147 (17)
methylprednisolone	chemical drug	4,36E-09	A2M,ANPEP,ANXA1,ANXA2,CCT6A,CST3,ENPP2,FN1,FSTL1,GNAI2,GPC1,HSP90B1,KRT10,LAMB2,LOX,MMP1,NPM1,PGAM1,PLS3,SERPINE1,SOD3,SPARC,SRI,VIM	72 (8)
ouabain	chemical drug	4,19E-06	ANXA5,HSPA5,HSPA8,VIM,YWHAG,YWHAQ	66 (7)
estrogen	chemical drug	3,42E-07	ALB,APOE,CLU,COL1A1,COL3A1,COL4A2,COL5A1,COL6A2,FBLN1,FN1,IGFBP4,IGFBP6,PTX3,SERPINE2,SPARC	169 (21)
tibolone	chemical drug	2,15E-02	SERPINE1
maxacalcitol	chemical drug	8,36E-03	ALB,TGFB1
spironolactone	chemical drug	1,97E-05	COL1A1,COL1A2,COL3A1,FN1,LOX,TGFB1,TIMP2	116 (18)
mifepristone	chemical drug	8,86E-08	ANXA1,APOE,C3,CLU,COL5A2,FBLN2,HSPA5,IGFBP3,LAMA2,LOX,MMP1,MMP3,POSTN,SERPINE1,TGFB1,THBS2	172 (18)
eplerenone	chemical drug	2,90E-04	FN1,MMP2,SERPINE1,TGFB1	140 (19)
mibolerone	chemical drug	1,46E-18	CALU,CCDC80,CLEC11A,CLTC,CLU,COL1A1,COL1A2,COL6A3,EIF4A1,HEXB,HSP90B1,HSPA5,IGFBP3,MMP1,P4HB,PGK1,PPIA,PPIB,SPOCK1,TGFBI,TUBA1A
finasteride	chemical drug	1,94E-02	CLU,TGFB1
testosterone propionate	chemical drug	1,34E-02	CLTC,CLU,TGFB1
cannabidiol	chemical drug	2,13E-02	FN1,VIM
S-equol	chemical drug	4,93E-03	MMP2,SERPINE1	54 (7)
tetraethylammonium	chemical drug	7,55E-09	ARHGDIA,HSPA8,HSPB1,PDIA3,PRDX3,SRI,TCP1,TPI1
chromium	chemical drug	1,95E-02	ARHGDIA,PGD,SOD3
MW-III-36C	chemical - protease inhibitor	1,08E-02	APP
benzyloxycarbonyl-Leu-Leu-Leu aldehyde	chemical - protease inhibitor	4,10E-10	APP,CCT2,CFL1,CLIC1,CLU,DCN,HNRNPA2B1,HSP90AA1,HSP90B1,HSPA5,HSPA8,HSPB1,HSPD1,MMP1,MMP2,PFN1,PPIA,PSMB2,TIMP1	154 (17)
Z-IL-CHO	chemical - protease inhibitor	2,15E-02	APP
TAPI-1	chemical - protease inhibitor	4,93E-03	APP,MMP2
epoxomicin	chemical - protease inhibitor	2,74E-02	HSPA5,PSMB5
4-hydroxymercuribenzoate	chemical - protease inhibitor	1,08E-02	COL1A1
lactacystin	chemical - protease inhibitor	2,38E-08	APP,CCT2,CFL1,CLIC1,GNAI2,HNRNPA2B1,HSP90B1,HSPA5,HSPB1,MMP1,MMP2,PFN1,PPIA,SLC3A2	151 (18)
cardiotoxin	chemical - other	1,00E-10	BGN,COL1A2,COL6A2,EZR,HSP90AA1,HSPA5,IGFBP7,LTBP1,MMP2,MMP3,MYH9,NPM1,PGAM1,RPSA,TIMP1
proanthocyanidin derivative	chemical - other	4,25E-02	MFGE8
phorbol esters	chemical - other	4,08E-04	ANXA1,APP,MMP1,MMP3,TGFB1,TIMP1	94 (13)
PP2/AG1879 tyrosine kinase inhibitor	chemical - kinase inhibitor	8,04E-03	FN1,PRDX3,SERPINE1,VIM	99 (14)
IND S1	chemical - kinase inhibitor	4,60E-11	ATP5B,CFL1,ENO1,PDIA3,PGAM1,PGK1,PRDX1,PRDX2
IND S7	chemical - kinase inhibitor	4,22E-10	ATP5B,CALU,ENO1,PDIA3,PGAM1,PGK1,PRDX2,VIM
MEL T1	chemical - kinase inhibitor	1,64E-10	ATP5B,CFL1,ENO1,HSPD1,PGAM1,PGK1,PRDX1
MEL S3	chemical - kinase inhibitor	1,99E-08	ATP5B,CALU,ENO1,PGAM1,PGK1,PRDX2,VIM
herbimycin	chemical - kinase inhibitor	1,26E-02	MMP1,MMP2,SERPINE1
LY294002	chemical - kinase inhibitor	1,86E-06	ANPEP,APOE,COL1A1,COL1A2,CST3,EMILIN1,FN1,HSP90AB1,HSPA5,IGFBP3,LMNA,MMP2,PGK1,POSTN,PRDX1,SERPINE1,TGFB1,THBS1,VIM	117 (20)
PD98059	chemical - kinase inhibitor	7,46E-12	ALDOA,ANPEP,ANXA1,BGN,C3,CLU,COL1A1,COL1A2,COL3A1,EEF1A1,ENO1,FN1,HNRNPA2B1,HSPA5,IGFBP3,LDHA,MMP1,MMP2,MMP3,PLEC,POSTN,SERPINE1,SLC3A2,TGFB1,THBS1,TIMP1,TIMP2,VIM	108 (19)
JAK inhibitor I	chemical - kinase inhibitor	2,74E-02	C3,TIMP1
Sb202190	chemical - kinase inhibitor	5,47E-05	COL1A1,FN1,HSPA5,MMP1,MMP2,PRDX1,SERPINE1,TIMP2	102 (20)
calphostin C	chemical - kinase inhibitor	6,02E-05	CLU,FN1,HSP90B1,HSPA5,P4HB,PDIA4	67 (8)
SB203580	chemical - kinase inhibitor	4,35E-12	ANXA1,C3,COL1A1,COL1A2,COL3A1,ENO1,FN1,GDI2,IGFBP3,MMP1,MMP2,MMP3,POSTN,PRDX1,RCN3,SERPINE1,SOD3,SPARC,TAGLN,TGFB1,THBS1,TIMP1,TIMP2	149 (21)
KN 93	chemical - kinase inhibitor	3,89E-02	MMP1,MMP2
H89	chemical - kinase inhibitor	4,89E-02	APP,MMP1,MMP2,SERPINE1
U0126	chemical - kinase inhibitor	1,90E-05	C3,COL1A1,EEF1A1,EEF2,ENPP2,FN1,HSP90AB1,HSPA5,INHBA,MMP1,MMP2,MMP3,POSTN,SERPINE1,THBS1,TIMP2,VIM	115 (17)
SP600125	chemical - kinase inhibitor	3,64E-07	APOE,COL1A1,FN1,MMP1,MMP3,PLEC,POSTN,PRDX1,PTX3,SERPINE1,TGFB1,THBS1,THBS2	139 (18)
IC261	chemical - kinase inhibitor	1,08E-02	APP
H-7	chemical - kinase inhibitor	4,19E-06	COL1A1,COL1A2,FN1,MMP1,MMP3,SERPINE1	147 (24)
(Ala9)-autocamtide-2	chemical - kinase inhibitor	3,45E-04	MMP1,MMP2
bisindolylmaleimide I	chemical - kinase inhibitor	1,20E-05	CLU,FN1,HSP90AB1,HSPA5,KRT10,MMP1,MMP2,SERPINE1	137 (17)
Ro31-8220	chemical - kinase inhibitor	6,47E-06	COL1A1,COL1A2,FN1,MMP1,MMP2,SERPINE1	140 (18)
bisindolylmaleimide	chemical - kinase inhibitor	3,18E-02	FN1,PRDX1
staurosporine	chemical - kinase inhibitor	1,31E-03	ANXA5,COL1A1,COL1A2,MMP1,PRDX1,SERPINE1	141 (19)
tyrphostin AG 1478	chemical - kinase inhibitor	3,58E-02	FBN1,MMP1,MMP2
N-chlorotaurine	chemical - kinase inhibitor	3,97E-03	MMP1,PRDX1
wortmannin	chemical - kinase inhibitor	1,42E-07	ANPEP,COL1A1,COL1A2,COL3A1,EZR,FN1,MMP2,MSN,NT5E,POSTN,SERPINE1,TPI1,VIM	106 (21)
15-deoxy-delta-12,14 -PGJ 2	chemical - endogenous non-mammalian	7,23E-04	COL1A1,COL1A2,FN1,HSPB1,MMP1,MMP3,PRDX1,SERPINE1	110 (16)
prostaglandin J2	chemical - endogenous non-mammalian	4,39E-02	PSMA5,PSMB2
sangivamycin	chemical - endogenous non-mammalian	3,20E-02	MMP1
E. coli B5 lipopolysaccharide	chemical - endogenous non-mammalian	6,23E-03	AHSG,EEF1A1,PPIA,PSMA5,RDX,SERPINE1,TGFB1,THBS1	126 (12)
E. coli lipopolysaccharide	chemical - endogenous non-mammalian	3,45E-02	HSP90B1,HSPA5,TGFB1
puromycin	chemical - endogenous non-mammalian	1,94E-02	HSPA5,SERPINE1
maslinic acid	chemical - endogenous non-mammalian	2,98E-05	ACTN1,CFL1,MSN,TGFB1,THBS1,TLN1,YWHAG
thymoquinone	chemical - endogenous non-mammalian	1,28E-03	COL1A1,COL3A1,MMP1,MMP3	98 (16)
peoniflorin	chemical - endogenous non-mammalian	1,94E-02	ENO1,PDIA3
E. coli serotype 0127B8 lipopolysaccharide	chemical - endogenous non-mammalian	5,70E-06	ANXA1,GNAI2,HSPA5,LAMB2,LAMC1,LOX,MMP3,PRDX3,PTX3,SEMA7A,SOD3	107 (7)
betulin	chemical - endogenous non-mammalian	6,85E-04	TIMP1,TIMP2	52 (7)
baicalin	chemical - endogenous non-mammalian	1,64E-03	COL1A1,MVP,SPARC,TAGLN	67 (7)
cercosporin	chemical - endogenous non-mammalian	3,20E-02	FN1
formylmethylflavin	chemical - endogenous non-mammalian	1,69E-03	MMP2,TIMP1	45 (5)
antimycin A	chemical - endogenous non-mammalian	5,13E-04	MMP1,TIMP1,TIMP2	84 (11)
2-mercaptoacetate	chemical - endogenous non-mammalian	6,84E-05	ANXA2,ENO1,MFGE8,TGFB1
ellagic acid	chemical - endogenous non-mammalian	1,42E-02	MMP1,MMP3
benzyl isothiocyanate	chemical - endogenous non-mammalian	1,58E-02	MMP2,SERPINE1
filipin	chemical - endogenous non-mammalian	3,20E-02	SERPINE1
ferulic acid	chemical - endogenous non-mammalian	2,21E-04	APP,DPYSL2,MMP1,TIMP1
monorden	chemical - endogenous non-mammalian	1,11E-02	HSP90B1,HSPA5
esculetin	chemical - endogenous non-mammalian	1,69E-03	ALB,COL1A1
decursin	chemical - endogenous non-mammalian	1,42E-02	MMP1,MMP3
geldanamycin	chemical - endogenous non-mammalian	9,80E-04	BGN,CLU,COL6A2,FBLN2,HSPA5,HSPD1,QSOX1
anisomycin	chemical - endogenous non-mammalian	1,67E-02	HSPA5,POSTN,SERPINE1
brefeldin A	chemical - endogenous non-mammalian	1,19E-02	APP,HSPA5,THBS1
anethole	chemical - endogenous non-mammalian	2,35E-03	MMP2,TIMP1	72 (7)
mangiferin	chemical - endogenous non-mammalian	2,13E-02	MMP1,TGFB1
isoliquiritigenin	chemical - endogenous non-mammalian	1,42E-02	MMP2,SERPINF1
magnolol	chemical - endogenous non-mammalian	1,42E-02	CLEC11A,MMP2
protocatechuic acid	chemical - endogenous non-mammalian	4,25E-02	APP
bisphenol A	chemical - endogenous non-mammalian	2,47E-02	C3,CLU,HSP90AB1,HSP90B1
actinomycin	chemical - endogenous non-mammalian	3,20E-02	IGFBP4
lumichrome	chemical - endogenous non-mammalian	1,69E-03	MMP2,TIMP1	45 (5)
mezerein	chemical - endogenous non-mammalian	2,32E-02	EEF1A1,FN1
baicalein	chemical - endogenous non-mammalian	1,28E-03	MMP1,MMP2,TIMP1,TIMP2	107 (14)
morin	chemical - endogenous non-mammalian	4,93E-03	MMP3,TIMP1	68 (7)
naringenin	chemical - endogenous non-mammalian	4,14E-02	HSPA5,TGFB1
ampelopsin	chemical - endogenous non-mammalian	3,20E-02	HSPA5
sanguinarine	chemical - endogenous non-mammalian	2,35E-03	TIMP1,TIMP2	72 (7)
tunicamycin	chemical - endogenous non-mammalian	5,66E-03	COL1A1,ERO1A,HSP90B1,HSPA5,PDIA6,VIM	76 (12)
E64	chemical - endogenous non-mammalian	2,15E-02	MMP2
2-aminoisobutyric acid	chemical - endogenous non-mammalian	1,08E-02	ALB
ecdysterone	chemical - endogenous non-mammalian	4,25E-02	COL1A1
platelet activating factor	chemical - endogenous mammalian	7,89E-07	FN1,MMP1,MMP2,SERPINE1,THBS1,TIMP1,TIMP2	108 (16)
13(S)-hydroxyoctadecadienoic acid	chemical - endogenous mammalian	4,25E-02	SERPINE1
9-hydroxy-(S)-10,12-octadecadienoic acid	chemical - endogenous mammalian	1,08E-02	SERPINE1
epoprostenol	chemical - endogenous mammalian	1,11E-02	MMP1,SERPINE1
dinoprost	chemical - endogenous mammalian	1,81E-05	MMP1,PDIA4,PTX3,TGFB1,THBS1,YWHAG,YWHAZ	150 (19)
lipoxin A4	chemical - endogenous mammalian	3,02E-05	FN1,SERPINE1,TGFB1,TIMP1,TIMP2	104 (15)
cyclic AMP	chemical - endogenous mammalian	4,91E-04	APP,FN1,IGFBP3,IGFBP4,INHBA,LGALS3BP,MMP1,SERPINE1,TIMP1,YWHAG	119 (16)
cyclic GMP	chemical - endogenous mammalian	1,11E-02	SERPINE1,VCL
5'-methylthioadenosine	chemical - endogenous mammalian	2,54E-04	COL1A1,COL1A2,MMP1
adenosine	chemical - endogenous mammalian	1,86E-02	HSPA5,SERPINE1,TIMP1
inosine	chemical - endogenous mammalian	6,00E-12	A2M,ANXA1,ANXA2,ANXA5,ARPC1B,C1S,C3,LGALS3BP,TIMP1,TUBA1A,VIM
xanthine	chemical - endogenous mammalian	9,68E-03	MMP2,TIMP2	43 (4)
kynurenine	chemical - endogenous mammalian	3,45E-04	MMP1,MMP3	54 (7)
L-methionine	chemical - endogenous mammalian	1,78E-05	ALB,CLU,EEF1A1,EEF1D,HSPA5,IGFBP4
L-arginine	chemical - endogenous mammalian	2,21E-04	BGN,FN1,SERPINE1,TGFB1	122 (22)
L-glutamic acid	chemical - endogenous mammalian	2,10E-02	ACLY,APP,HEXA,TIMP1
glutamine	chemical - endogenous mammalian	2,05E-03	HK1,HSPA5,SRSF1,THBS2,VIM
L-isoleucine	chemical - endogenous mammalian	2,15E-02	ALB
L-leucine	chemical - endogenous mammalian	2,15E-02	ALB
hyaluronic acid	chemical - endogenous mammalian	2,26E-06	COL6A2,FN1,MMP1,MMP2,MMP3,SERPINE1,TGFB1,TIMP1,TIMP2	98 (14)
heparin	chemical - endogenous mammalian	4,86E-07	APOE,COL1A1,FN1,IGFBP3,MMP1,MMP2,PAPPA,VIM	107 (17)
mannitol	chemical - endogenous mammalian	1,42E-02	COL1A1,FN1
2-methoxyestradiol	chemical - endogenous mammalian	1,04E-02	LOX,SERPINE2,YWHAB
beta-estradiol	chemical - endogenous mammalian	5,48E-27	A2M,AEBP1,ALB,ALDOA,ANPEP,ANXA1,APOE,APP,C3,CCDC80,CCT2,CLU,COL1A1,COL1A2,COL3A1,COMP,DCN,ENO1,ENPP2,EXT2,FBLN1,FBLN2,FBN1,FN1,FSTL1,GARS,GDI2,GPC1,HNRNPA1,HSP90AB1,HSP90B1,HSPA5,HSPA8,HSPB1,HSPD1,HTRA1,IGFBP3,IGFBP4,IGFBP6,INHBA,KRT16,KRT5,LAMB1,LAMB2,LDHA,LMNA,LTBP1,LUM,MMP1,MMP2,NPM1,NRP1,NUCB2,PDIA3,PDIA4,PGK1,PKM,PPIB,PSMB2,PTX3,PXDN,QSOX1,SERPINA5,SLC3A2,SPARC,SPOCK1,SPTAN1,SRSF1,TGFB1,THBS…	129 (17)
ursodeoxycholic acid	chemical - endogenous mammalian	5,10E-04	COL1A1,COL1A2,SPARC,TGFB1,TIMP1	76 (9)
hyodeoxycholic acid	chemical - endogenous mammalian	3,20E-02	APOE
hydrogen peroxide	chemical - endogenous mammalian	4,43E-14	AEBP1,ANXA2,APP,CLU,COL1A1,COL1A2,CST3,EEF1A1,ENPP2,EZR,FN1,HNRNPA1,HSPA5,MMP1,MMP2,MMP3,PDIA3,PDIA4,PRDX1,PRDX2,PTX3,RCN1,SERPINE1,SERPINH1,SPARC,TAGLN,VIM,XRCC6	96 (15)
linoleic acid	chemical - endogenous mammalian	5,92E-04	APP,CLU,HSP90B1,HSPA5,MMP1	101 (17)
prostaglandin E2	chemical - endogenous mammalian	6,15E-07	ANXA2,APP,COL1A1,DCN,FN1,IGFBP4,IGFBP7,LMNA,MMP1,MMP2,NRP1,NT5E,TGFB1,THBS1,XRCC6	112 (21)
UTP	chemical - endogenous mammalian	3,18E-02	SERPINE1,THBS1
chondroitin sulfate	chemical - endogenous mammalian	1,13E-03	FN1,MMP3	94 (11)
1-O-hexadecyl-2-N-methylcarbamol-sn-glycerol-3-phosphocholine	chemical - endogenous mammalian	4,25E-02	MMP2
ATP	chemical - endogenous mammalian	7,59E-04	MMP1,MMP3,NRP1,SERPINE1,THBS1,TUBB3	131 (17)
chondroitin sulfate A	chemical - endogenous mammalian	3,27E-04	MMP2,TIMP1,TIMP2	72 (7)
hydrocortisone	chemical - endogenous mammalian	1,14E-05	EZR,FN1,HSPD1,IGFBP3,IGFBP4,IGFBP6,IGFBP7,INHBA,SERPINE1	125 (18)
cortodoxone	chemical - endogenous mammalian	1,08E-02	FN1
fingolimod phosphate	chemical - endogenous mammalian	2,35E-03	SERPINE1,THBS1
indican	chemical - endogenous mammalian	3,64E-02	ALB,THBS1
arginine	chemical - endogenous mammalian	3,33E-03	ALB,HSPA5,TGFB1	85 (11)
asparagine	chemical - endogenous mammalian	4,25E-02	ALB
carboxymethylflavin	chemical - endogenous mammalian	1,69E-03	MMP2,TIMP1	45 (5)
superoxide	chemical - endogenous mammalian	6,26E-04	CLU,FN1,TIMP1	94 (12)
mevalonic acid	chemical - endogenous mammalian	6,81E-03	MMP1,SERPINE1,TGFB1	135 (17)
phenylacetic acid	chemical - endogenous mammalian	3,45E-04	MMP2,TIMP2
methylamine	chemical - endogenous mammalian	4,25E-02	FN1
advanced glycation end-products	chemical - endogenous mammalian	8,61E-05	FN1,MMP1,PFN1,SERPINE1,SERPINF1	115 (18)
nitric oxide	chemical - endogenous mammalian	1,67E-07	APP,HSP90AA1,HSP90AB1,HSPG2,MMP2,NID1,PDIA4,THBS1,TIMP2,TLN1,TP53I3,VCL	160 (16)
4-phenylbutyric acid	chemical - endogenous mammalian	1,23E-03	AHSG,HSP90B1,HSPA5,MMP2,TIMP2	6 (2)
levothyroxine	chemical - endogenous mammalian	1,86E-02	APOE,IGFBP3,IGFBP4
carbon monoxide	chemical - endogenous mammalian	3,78E-03	FN1,PRDX1,SERPINE1,TGFB1	92 (17)
pyridoxal phosphate	chemical - endogenous mammalian	3,20E-02	COL1A1
ethanol	chemical - endogenous mammalian	3,69E-07	ACLY,ANPEP,CLU,COL1A2,COL3A1,GNAI2,HSP90AB1,HSP90B1,HSPA5,MMP2,MMP3,SEC23A,SERPINE1,SPTBN1,TGFB1,TIMP1,TIMP2	96 (15)
thyroid hormone	chemical - endogenous mammalian	3,81E-03	APOE,HSP90AB1,IGFBP3,IGFBP4,PGD,SERPINE2,VIM	68 (7)
sphingosine-1-phosphate	chemical - endogenous mammalian	2,27E-07	ANXA2,ENPP2,FN1,SERPINE1,TAGLN,TGFB1,THBS1,TIMP1,VIM	107 (17)
cholecalciferol	chemical - endogenous mammalian	1,25E-02	COL1A1,IGFBP3,SERPINE1,TGFB1
acetaldehyde	chemical - endogenous mammalian	2,48E-06	COL1A1,COL1A2,MMP2,TGFB1,TIMP1	101 (16)
octanal	chemical - endogenous mammalian	2,15E-02	TUBB3
lipid	chemical - endogenous mammalian	3,64E-02	ACLY,CLU
butyric acid	chemical - endogenous mammalian	1,68E-13	A2M,ALB,ANXA1,ANXA2,ANXA5,CLU,COL4A2,COL5A1,COL5A2,COL6A3,FSTL1,GNAI2,HK1,HSPG2,IGFBP3,MVP,NPM1,NRP1,NUCB1,PDIA3,PRDX1,SERPINE1,SPOCK1,TGFB1,TGFBI,TIMP1,TP53I3	150 (16)
4-aminophenol	chemical - endogenous mammalian	1,13E-03	CLU,VIM
tretinoin	chemical - endogenous mammalian	7,81E-29	A2M,ABI3BP,ANPEP,ANXA1,ANXA2,ANXA5,ANXA6,APOE,APP,C3,CLEC11A,CLTC,COL1A1,COL1A2,COL3A1,COL4A2,DCN,EEF1A1,EEF1D,EEF1G,EIF4A1,ENPP2,FN1,GARS,HK1,HSPB1,HSPD1,IGFBP3,IGFBP4,IGFBP6,IGFBP7,INHBA,ISLR,KRT1,KRT16,KRT5,LAMA4,LAMB1,LGALS3BP,LOXL2,MMP1,MMP3,MYH9,NID2,NPM1,NRP1,PFN1,PGD,PLOD3,PLS3,POSTN,PRDX2,PTX3,RPS14,SEMA7A,SERPINE1,SERPINE2,SPARC,TGFB1,TGFBI,THBS1,TIMP1,TPI1,TPM4,TUBB3,UBA1,VCL,VIM,XRCC6…	124 (17)
thiamine	chemical - endogenous mammalian	2,15E-02	TKT
ascorbic acid	chemical - endogenous mammalian	1,85E-04	HSPA5,IGFBP3,IGFBP4,SERPINE1,SPARC,TGFB1	102 (16)
riboflavin	chemical - endogenous mammalian	1,76E-02	MMP2,TIMP1
farnesyl pyrophosphate	chemical - endogenous mammalian	3,27E-04	APP,SERPINE1,TGFB1	117 (11)
5-hydroxytryptamine	chemical - endogenous mammalian	6,60E-03	NUCB2,SERPINE1,TGFB1,THBS1	148 (21)
alpha-hydroxyglutarate	chemical - endogenous mammalian	1,13E-03	FN1,VIM
sulfur	chemical - endogenous mammalian	2,15E-02	MMP2
linolenic acid	chemical - endogenous mammalian	2,95E-02	CLU,SERPINE1
lipid peroxide	chemical - endogenous mammalian	4,25E-02	TGFB1
palmitic acid	chemical - endogenous mammalian	1,62E-03	ACLY,AHSG,ALDOA,EEF1A1,GAPDH,HSPA5,SERPINE1	95 (16)
oleic acid	chemical - endogenous mammalian	8,23E-05	APOE,APP,CLU,GAPDH,HSPA5,IGFBP3,SERPINE1	100 (19)
ceramide	chemical - endogenous mammalian	2,99E-03	COL1A1,GAPDH,MMP1	129 (17)
arachidonic acid	chemical - endogenous mammalian	1,46E-02	CLU,COL1A2,RPS14,VIM
UDP-D-glucose	chemical - endogenous mammalian	1,95E-07	HSP90B1,HSPA5,PDIA3,PDIA4
NAD+	chemical - endogenous mammalian	4,25E-02	TGFB1
selenomethionine	chemical - endogenous mammalian	6,85E-04	MMP2,MMP3
GABA	chemical - endogenous mammalian	8,29E-05	FN1,MMP2,MMP3,TGFB1	85 (13)
S-adenosylhomocysteine	chemical - endogenous mammalian	1,16E-04	COL1A1,COL1A2
S-adenosylmethionine	chemical - endogenous mammalian	5,33E-03	COL1A1,COL1A2,TGFB1	97 (14)
N(6)-carboxymethyl-L-lysine	chemical - endogenous mammalian	2,15E-02	FN1
3,5-diiodothyronine	chemical - endogenous mammalian	5,98E-03	ENO1,GAPDH
glutamyl-Se-methylselenocysteine	chemical - endogenous mammalian	7,54E-04	CLU,GNAI2,TIMP2
selenomethylselenocysteine	chemical - endogenous mammalian	2,32E-02	CLU,TIMP2
taurine	chemical - endogenous mammalian	4,06E-03	FN1,MMP2,VIM	91 (18)
L-triiodothyronine	chemical - endogenous mammalian	3,45E-11	A2M,AHSG,ALB,APP,C1S,CCT4,CLU,CST3,ENPP2,FKBP10,GNAI2,IGFBP3,IGFBP4,KRT16,LMNA,NID1,PGK1,PRDX2,PRDX3,RPS14,SEMA7A,UBA1
homocysteine	chemical - endogenous mammalian	1,46E-07	ANXA2,CLU,EEF1A1,EEF1D,HSPA5,MMP2,PRDX1,PRDX2,TIMP1	85 (14)
D-glucose	chemical - endogenous mammalian	5,93E-20	ACLY,ALDOA,ANXA1,C3,CLU,COL1A1,COL3A1,DCN,ENO1,FN1,GAPDH,HK1,HSPA5,HSPB1,HSPD1,LAMC1,LDHA,MDH2,MMP1,MMP2,PDIA3,PDIA4,PDIA6,PGAM1,PGK1,PPIB,RPS14,SERPINE1,SLC3A2,SRSF1,TALDO1,TGFB1,THBS1,TIMP1,TKT,TPI1,TUBB3	109 (18)
D-fructose	chemical - endogenous mammalian	1,41E-08	COL1A1,COL3A1,FN1,MMP2,TGFB1,THBS1,TIMP1,TKT	141 (15)
mannose	chemical - endogenous mammalian	6,11E-06	HSP90B1,HSPA5,PDIA3,THBS1	62 (6)
glucosamine	chemical - endogenous mammalian	1,59E-02	HSP90B1,MDH2,MMP3
sucrose	chemical - endogenous mammalian	1,64E-03	APOE,APP,PDIA3
trehalose	chemical - endogenous mammalian	4,25E-02	VIM
22-hydroxycholesterol	chemical - endogenous mammalian	2,15E-02	APOE
aldosterone	chemical - endogenous mammalian	4,14E-06	COL1A1,COL1A2,COL3A1,FN1,LOX,MMP2,SERPINE1,TGFB1,YWHAB	127 (18)
dihydrotestosterone	chemical - endogenous mammalian	9,95E-20	ACLY,ALDOA,APOE,APP,CLU,COL3A1,COL5A2,COL6A1,ENO1,FN1,GAPDH,HSP90AA1,HSPB1,IGFBP3,IGFBP4,IGFBP7,KRT1,KRT5,LDHA,LOX,LTBP1,MMP1,MMP2,NID2,NUCB1,PFN1,POSTN,RPL12,SERPINE2,SLC3A2,SOD3,SPARC,TALDO1,THBS1,TKT,UGDH,VIM	153 (20)
cholesterol	chemical - endogenous mammalian	1,70E-07	ACLY,APOE,APP,COL1A1,COL3A1,FN1,HSP90B1,HSPA5,MMP1,MMP2,TGFB1,THBS1,TIMP1	120 (21)
24-hydroxycholesterol	chemical - endogenous mammalian	5,13E-04	APOE,APP,HSPA5	69 (11)
oxysterol	chemical - endogenous mammalian	7,54E-04	APOE,TGFB1,TIMP1
testosterone	chemical - endogenous mammalian	6,70E-07	A2M,ALDOA,ANPEP,ANXA1,CLU,FN1,GDI2,GPC1,HSP90AB1,HSPD1,INHBA,PDIA4,SERPINA5,THBS1,TUBB3,YWHAZ	160 (18)
progesterone	chemical - endogenous mammalian	3,84E-09	AEBP1,APOE,C3,CNDP2,CST3,ENPP2,EZR,FN1,GARS,HSPA8,IGFBP3,INHBA,KRT5,LAMA2,MMP1,MMP2,MMP3,NRP1,POSTN,PTX3,TGFB1,TGFBI,TIMP1,VIM,YWHAG	111 (16)
Ca2+	chemical - endogenous mammalian	1,06E-04	APP,COL1A1,FN1,HSPA5,KRT1,KRT10,PLS3,SERPINE1,TAGLN,TGFB1,TIMP2	128 (16)
phosphate	chemical - endogenous mammalian	2,83E-10	A2M,AHSG,COL5A1,DCN,ECM1,EMILIN1,LDHA,NPM1,PLEC,POSTN,TGFB1,TIMP1
copper	chemical - endogenous mammalian	8,36E-03	APP,MMP1	76 (9)
manganese	chemical - endogenous mammalian	4,13E-04	GAPDH,HSP90B1,HSPA5
bapineuzumab	biologic drug	1,08E-02	APP
GnRH analog	biologic drug	3,46E-06	ACTN1,ACTN4,COL6A1,EXT2,FN1,GDI2,HSP90AB1,INHBA,KRT10,PPIA,SRI,TUBA1A,VAT1,VCL,VCP
defibrotide	biologic drug	3,20E-02	SERPINE1
interferon beta-1a	biologic drug	5,47E-05	CCT4,CCT6A,EEF1G,ENO1,KRT1,PGAM1,PGK1,PPIA
clusterin antisense oligonucleotide	biologic drug	2,15E-02	CLU
vancomycin	biologic drug	3,45E-07	A2M,ANXA1,ANXA2,C3,CLU,RCN1,SOD3,TIMP1,VIM
leuprolide	biologic drug	7,03E-08	APP,MMP1,MMP2,MMP3,TGFB1,TIMP1	103 (15)
desmopressin	biologic drug	5,65E-07	ALB,ENO1,GAPDH,HSPA8,LDHB,LMNA,PLS3,PPIA,YWHAZ
bacitracin	biologic drug	2,15E-02	ANXA5
elcatonin	biologic drug	4,25E-02	MMP2
lisinopril	biologic drug	1,58E-02	MMP2,TGFB1
ceruletide	biologic drug	2,32E-02	ACTG1,HSPA5
glutathione ethyl ester	biologic drug	3,20E-02	MMP1
cyclosporin A	biologic drug	2,47E-13	A2M,ANXA1,ANXA2,APOE,APP,BGN,CLU,COL1A1,COL4A2,FN1,HSP90AA1,HSPA5,HSPD1,KRT16,MDH2,MMP1,MMP2,MMP3,PKM,POSTN,SERPINE1,SERPINH1,SRSF1,TAGLN,TGFB1,TIMP1,VIM	108 (17)
poly rI:rC-RNA	biologic drug	5,36E-03	ANXA1,C3,EZR,FN1,IGFBP6,MMP1,MMP2,MMP3,TGFB1,THBS1,TP53I3	127 (15)
