# Supplementary material
Source: publisher figshare collection journal article supplement (https://tandf.figshare.com/articles/dataset/_/3503471)
Supplement: Supplementary file 3 [file 1 › 2016CC7185R-s09.xlsx]

## Sheet: MUSE sample 151120
123	4	8.22	41.46	23.58	20.73	sp|P31946|1433B_HUMAN	14-3-3 protein beta/alpha OS=Homo sapiens GN=YWHAB PE=1 SV=3	HUMAN	5	sp	P31946	1433B_HUMAN
68	7.51	10.76	47.06	32.55	27.84	sp|P62258|1433E_HUMAN	14-3-3 protein epsilon OS=Homo sapiens GN=YWHAE PE=1 SV=1	HUMAN	7	sp	P62258	1433E_HUMAN
63	8.4	11.6	38.46	27.13	24.29	sp|P61981|1433G_HUMAN	14-3-3 protein gamma OS=Homo sapiens GN=YWHAG PE=1 SV=2	HUMAN	7	sp	P61981	1433G_HUMAN
229	1.54	5.74	28.57	19.18	16.33	sp|P27348|1433T_HUMAN	14-3-3 protein theta OS=Homo sapiens GN=YWHAQ PE=1 SV=1	HUMAN	4	sp	P27348	1433T_HUMAN
48	11.94	11.95	52.85	42.68	36.18	tr|E7EX29|E7EX29_HUMAN	14-3-3 protein zeta/delta (Fragment) OS=Homo sapiens GN=YWHAZ PE=1 SV=1	HUMAN	7	tr	E7EX29	E7EX29_HUMAN
106	4.67	4.67	17.87	14.45	14.45	tr|C9J9K3|C9J9K3_HUMAN	40S ribosomal protein SA (Fragment) OS=Homo sapiens GN=RPSA PE=1 SV=4	HUMAN	3	tr	C9J9K3	C9J9K3_HUMAN
125	4	4	14.98	4.355	4.355	sp|P21589|5NTD_HUMAN	5'-nucleotidase OS=Homo sapiens GN=NT5E PE=1 SV=1	HUMAN	2	sp	P21589	5NTD_HUMAN
183	2.06	2.06	13.57	10.47	10.47	sp|O95336|6PGL_HUMAN	6-phosphogluconolactonase OS=Homo sapiens GN=PGLS PE=1 SV=2	HUMAN	2	sp	O95336	6PGL_HUMAN
173	2.16	2.16	9.964	9.964	6.406	tr|F8VWS0|F8VWS0_HUMAN	60S acidic ribosomal protein P0 OS=Homo sapiens GN=RPLP0 PE=1 SV=1	HUMAN	2	tr	F8VWS0	F8VWS0_HUMAN
140	3.38	3.38	49.7	13.77	13.77	tr|H0YHA7|H0YHA7_HUMAN	60S ribosomal protein L18 (Fragment) OS=Homo sapiens GN=RPL18 PE=1 SV=1	HUMAN	2	tr	H0YHA7	H0YHA7_HUMAN
24	21.9	21.9	36.82	22.88	19.55	sp|P08253|MMP2_HUMAN	72 kDa type IV collagenase OS=Homo sapiens GN=MMP2 PE=1 SV=2	HUMAN	14	sp	P08253	MMP2_HUMAN
13	38.84	38.84	53.98	44.8	37.77	sp|P11021|GRP78_HUMAN	78 kDa glucose-regulated protein OS=Homo sapiens GN=HSPA5 PE=1 SV=2	HUMAN	20	sp	P11021	GRP78_HUMAN
18	29.6	29.6	55.2	49.33	44	sp|P63261|ACTG_HUMAN	Actin, cytoplasmic 2 OS=Homo sapiens GN=ACTG1 PE=1 SV=1	HUMAN	17	sp	P63261	ACTG_HUMAN
121	4.02	4.02	8.992	3.542	3.542	sp|P02765|FETUA_HUMAN	Alpha-2-HS-glycoprotein OS=Homo sapiens GN=AHSG PE=1 SV=1	HUMAN	5	sp	P02765	FETUA_HUMAN
28	19.61	19.61	13.91	9.634	8.684	sp|P01023|A2MG_HUMAN	Alpha-2-macroglobulin OS=Homo sapiens GN=A2M PE=1 SV=3	HUMAN	16	sp	P01023	A2MG_HUMAN
337	0.28	11.41	27.13	12.17	10.83	tr|H9KV75|H9KV75_HUMAN	Alpha-actinin-1 OS=Homo sapiens GN=ACTN1 PE=1 SV=1	HUMAN	8	tr	H9KV75	H9KV75_HUMAN
37	14.69	14.69	29.31	13.06	9.879	sp|O43707|ACTN4_HUMAN	Alpha-actinin-4 OS=Homo sapiens GN=ACTN4 PE=1 SV=2	HUMAN	8	sp	O43707	ACTN4_HUMAN
22	24.5	24.5	53.46	43.78	39.17	sp|P06733|ENOA_HUMAN	Alpha-enolase OS=Homo sapiens GN=ENO1 PE=1 SV=2	HUMAN	13	sp	P06733	ENOA_HUMAN
65	8.04	8.06	12.06	8.199	7.074	tr|J3KMX3|J3KMX3_HUMAN	Alpha-fetoprotein OS=Homo sapiens GN=AFP PE=1 SV=1	HUMAN	5	tr	J3KMX3	J3KMX3_HUMAN
39	13.4	13.4	41.91	34.97	31.21	sp|P04083|ANXA1_HUMAN	Annexin A1 OS=Homo sapiens GN=ANXA1 PE=1 SV=2	HUMAN	8	sp	P04083	ANXA1_HUMAN
15	33.49	33.49	64.01	54.57	47.49	sp|P07355|ANXA2_HUMAN	Annexin A2 OS=Homo sapiens GN=ANXA2 PE=1 SV=2	HUMAN	22	sp	P07355	ANXA2_HUMAN
84	6.04	6.06	22.19	14.06	11.87	sp|P08758|ANXA5_HUMAN	Annexin A5 OS=Homo sapiens GN=ANXA5 PE=1 SV=2	HUMAN	4	sp	P08758	ANXA5_HUMAN
196	2	2.55	19.76	2.377	2.377	sp|P08133|ANXA6_HUMAN	Annexin A6 OS=Homo sapiens GN=ANXA6 PE=1 SV=3	HUMAN	2	sp	P08133	ANXA6_HUMAN
36	15.41	15.41	45.26	34.05	21.34	sp|P01008|ANT3_HUMAN	Antithrombin-III OS=Homo sapiens GN=SERPINC1 PE=1 SV=1	HUMAN	15	sp	P01008	ANT3_HUMAN
157	2.78	2.8	5.172	0.6136	0.4602	sp|P04114|APOB_HUMAN	Apolipoprotein B-100 OS=Homo sapiens GN=APOB PE=1 SV=2	HUMAN	2	sp	P04114	APOB_HUMAN
215	1.74	1.74	19.53	8.372	8.372	tr|C9JF17|C9JF17_HUMAN	Apolipoprotein D (Fragment) OS=Homo sapiens GN=APOD PE=1 SV=1	HUMAN	2	tr	C9JF17	C9JF17_HUMAN
112	4.3	4.3	28.57	15.84	5.901	sp|P05089|ARGI1_HUMAN	Arginase-1 OS=Homo sapiens GN=ARG1 PE=1 SV=2	HUMAN	2	sp	P05089	ARGI1_HUMAN
141	3.37	3.37	31.4	6.047	4.651	sp|P00505|AATM_HUMAN	Aspartate aminotransferase, mitochondrial OS=Homo sapiens GN=GOT2 PE=1 SV=3	HUMAN	2	sp	P00505	AATM_HUMAN
17	31.3	31.3	11.64	5.944	4.919	sp|P98160|PGBM_HUMAN	Basement membrane-specific heparan sulfate proteoglycan core protein OS=Homo sapiens GN=HSPG2 PE=1 SV=4	HUMAN	18	sp	P98160	PGBM_HUMAN
162	2.46	2.46	33.66	19.8	19.8	tr|F5H6I0|F5H6I0_HUMAN	Beta-2-microglobulin OS=Homo sapiens GN=B2M PE=1 SV=2	HUMAN	2	tr	F5H6I0	F5H6I0_HUMAN
51	11.19	11.19	30.16	25	21.47	sp|P21810|PGS1_HUMAN	Biglycan OS=Homo sapiens GN=BGN PE=1 SV=2	HUMAN	8	sp	P21810	PGS1_HUMAN
87	5.92	5.92	17.96	9.907	9.907	tr|A0A0A6YY95|A0A0A6YY95_HUMAN	C-type lectin domain family 11 member A OS=Homo sapiens GN=CLEC11A PE=1 SV=1	HUMAN	3	tr	A0A0A6YY95	A0A0A6YY95_HUMAN
150	3.09	3.09	19.25	15.51	15.51	tr|H0Y7A7|H0Y7A7_HUMAN	Calmodulin (Fragment) OS=Homo sapiens GN=CALM2 PE=1 SV=1	HUMAN	2	tr	H0Y7A7	H0Y7A7_HUMAN
58	9.77	9.77	24.94	15.83	15.83	sp|P27797|CALR_HUMAN	Calreticulin OS=Homo sapiens GN=CALR PE=1 SV=1	HUMAN	5	sp	P27797	CALR_HUMAN
126	3.98	3.98	8.257	3.67	2.854	sp|O94985|CSTN1_HUMAN	Calsyntenin-1 OS=Homo sapiens GN=CLSTN1 PE=1 SV=1	HUMAN	3	sp	O94985	CSTN1_HUMAN
156	2.88	4.71	30.48	23.81	8.254	sp|O43852|CALU_HUMAN	Calumenin OS=Homo sapiens GN=CALU PE=1 SV=2	HUMAN	2	sp	O43852	CALU_HUMAN
143	3.34	3.34	10.36	2.762	2.762	tr|G3XAP6|G3XAP6_HUMAN	Cartilage oligomeric matrix protein OS=Homo sapiens GN=COMP PE=1 SV=1	HUMAN	2	tr	G3XAP6	G3XAP6_HUMAN
103	4.78	4.78	33.47	24.38	11.98	sp|P31944|CASPE_HUMAN	Caspase-14 OS=Homo sapiens GN=CASP14 PE=1 SV=2	HUMAN	3	sp	P31944	CASPE_HUMAN
91	5.68	5.68	15.18	10.82	10.82	sp|P04040|CATA_HUMAN	Catalase OS=Homo sapiens GN=CAT PE=1 SV=3	HUMAN	4	sp	P04040	CATA_HUMAN
80	6.53	6.53	18.88	18.88	16.52	sp|P07858|CATB_HUMAN	Cathepsin B OS=Homo sapiens GN=CTSB PE=1 SV=3	HUMAN	5	sp	P07858	CATB_HUMAN
128	3.92	3.92	21.36	9.223	9.223	sp|P07339|CATD_HUMAN	Cathepsin D OS=Homo sapiens GN=CTSD PE=1 SV=1	HUMAN	4	sp	P07339	CATD_HUMAN
108	4.54	4.54	20.13	10.23	7.261	sp|Q9UBR2|CATZ_HUMAN	Cathepsin Z OS=Homo sapiens GN=CTSZ PE=1 SV=1	HUMAN	2	sp	Q9UBR2	CATZ_HUMAN
144	3.34	3.34	21.15	8.877	8.877	sp|P36222|CH3L1_HUMAN	Chitinase-3-like protein 1 OS=Homo sapiens GN=CHI3L1 PE=1 SV=2	HUMAN	2	sp	P36222	CH3L1_HUMAN
134	3.68	3.68	27.45	11.27	11.27	tr|E9PK25|E9PK25_HUMAN	Cofilin-1 OS=Homo sapiens GN=CFL1 PE=1 SV=1	HUMAN	2	tr	E9PK25	E9PK25_HUMAN
10	55.04	55.04	35.04	28.01	26.98	sp|P02452|CO1A1_HUMAN	Collagen alpha-1(I) chain OS=Homo sapiens GN=COL1A1 PE=1 SV=5	HUMAN	58	sp	P02452	CO1A1_HUMAN
374	0.17	2.28	11.23	1.614	0.9415	sp|P02458|CO2A1_HUMAN	Collagen alpha-1(II) chain OS=Homo sapiens GN=COL2A1 PE=1 SV=3	HUMAN	4	sp	P02458	CO2A1_HUMAN
49	11.85	11.85	20.05	10.03	6.753	sp|P02461|CO3A1_HUMAN	Collagen alpha-1(III) chain OS=Homo sapiens GN=COL3A1 PE=1 SV=4	HUMAN	8	sp	P02461	CO3A1_HUMAN
101	4.86	4.86	9.956	2.339	1.959	tr|A0A087WXW9|A0A087WXW9_HUMAN	Collagen alpha-1(V) chain OS=Homo sapiens GN=COL5A1 PE=1 SV=1	HUMAN	3	tr	A0A087WXW9	A0A087WXW9_HUMAN
20	26.46	26.46	30.6	19.2	16.08	tr|A0A087X0S5|A0A087X0S5_HUMAN	Collagen alpha-1(VI) chain OS=Homo sapiens GN=COL6A1 PE=1 SV=1	HUMAN	15	tr	A0A087X0S5	A0A087X0S5_HUMAN
11	49.78	49.78	21.85	12.9	10.65	tr|D6RGG3|D6RGG3_HUMAN	Collagen alpha-1(XII) chain OS=Homo sapiens GN=COL12A1 PE=1 SV=1	HUMAN	28	tr	D6RGG3	D6RGG3_HUMAN
9	55.39	55.39	47.14	34.26	33.09	sp|P08123|CO1A2_HUMAN	Collagen alpha-2(I) chain OS=Homo sapiens GN=COL1A2 PE=1 SV=7	HUMAN	52	sp	P08123	CO1A2_HUMAN
164	2.39	2.4	10.28	2.22	1.343	sp|P08572|CO4A2_HUMAN	Collagen alpha-2(IV) chain OS=Homo sapiens GN=COL4A2 PE=1 SV=4	HUMAN	2	sp	P08572	CO4A2_HUMAN
19	29.11	29.11	35.62	16.09	13.84	sp|P12110|CO6A2_HUMAN	Collagen alpha-2(VI) chain OS=Homo sapiens GN=COL6A2 PE=1 SV=4	HUMAN	17	sp	P12110	CO6A2_HUMAN
1	163.73	163.73	40.76	32.51	28.05	sp|P12111|CO6A3_HUMAN	Collagen alpha-3(VI) chain OS=Homo sapiens GN=COL6A3 PE=1 SV=5	HUMAN	84	sp	P12111	CO6A3_HUMAN
171	2.24	2.24	12.87	4.089	1.924	sp|P01024|CO3_HUMAN	Complement C3 OS=Homo sapiens GN=C3 PE=1 SV=2	HUMAN	4	sp	P01024	CO3_HUMAN
129	3.78	3.78	7.715	2.356	1.826	tr|F5GXS0|F5GXS0_HUMAN	Complement C4-B OS=Homo sapiens GN=C4B PE=1 SV=1	HUMAN	3	tr	F5GXS0	F5GXS0_HUMAN
136	3.58	3.58	55.1	26.53	26.53	sp|P01040|CYTA_HUMAN	Cystatin-A OS=Homo sapiens GN=CSTA PE=1 SV=1	HUMAN	2	sp	P01040	CYTA_HUMAN
159	2.65	2.65	30.14	19.18	19.18	sp|P01034|CYTC_HUMAN	Cystatin-C OS=Homo sapiens GN=CST3 PE=1 SV=1	HUMAN	2	sp	P01034	CYTC_HUMAN
158	2.69	2.69	41.58	21.78	21.78	tr|C9JFR7|C9JFR7_HUMAN	Cytochrome c (Fragment) OS=Homo sapiens GN=CYCS PE=1 SV=1	HUMAN	2	tr	C9JFR7	C9JFR7_HUMAN
76	7.02	7.02	35.45	35.45	35.45	sp|P81605|DCD_HUMAN	Dermcidin OS=Homo sapiens GN=DCD PE=1 SV=2	HUMAN	4	sp	P81605	DCD_HUMAN
94	5.17	5.17	11.52	4.362	4.362	sp|Q08554|DSC1_HUMAN	Desmocollin-1 OS=Homo sapiens GN=DSC1 PE=1 SV=2	HUMAN	3	sp	Q08554	DSC1_HUMAN
55	10	10.11	17.35	11.34	8.389	sp|Q02413|DSG1_HUMAN	Desmoglein-1 OS=Homo sapiens GN=DSG1 PE=1 SV=2	HUMAN	6	sp	Q02413	DSG1_HUMAN
27	20.3	20.33	23.82	5.991	3.866	sp|P15924|DESP_HUMAN	Desmoplakin OS=Homo sapiens GN=DSP PE=1 SV=3	HUMAN	11	sp	P15924	DESP_HUMAN
309	0.52	0.52	16.98	10.06	10.06	sp|P27695|APEX1_HUMAN	DNA-(apurinic or apyrimidinic site) lyase OS=Homo sapiens GN=APEX1 PE=1 SV=2	HUMAN	2	sp	P27695	APEX1_HUMAN
99	5.02	5.02	14.45	6.476	4.234	sp|P14625|ENPL_HUMAN	Endoplasmin OS=Homo sapiens GN=HSP90B1 PE=1 SV=1	HUMAN	3	sp	P14625	ENPL_HUMAN
2	159.59	159.59	42.29	39.44	37.13	sp|P02751|FINC_HUMAN	Fibronectin OS=Homo sapiens GN=FN1 PE=1 SV=4	HUMAN	155	sp	P02751	FINC_HUMAN
174	2.12	2.12	6.221	0.7634	0.7634	tr|Q60FE5|Q60FE5_HUMAN	Filamin A OS=Homo sapiens GN=FLNA PE=1 SV=1	HUMAN	2	tr	Q60FE5	Q60FE5_HUMAN
118	4.14	4.14	21.75	11.36	8.766	sp|Q12841|FSTL1_HUMAN	Follistatin-related protein 1 OS=Homo sapiens GN=FSTL1 PE=1 SV=1	HUMAN	4	sp	Q12841	FSTL1_HUMAN
40	13.11	13.11	50.54	31.25	25	tr|J3KPS3|J3KPS3_HUMAN	Fructose-bisphosphate aldolase OS=Homo sapiens GN=ALDOA PE=1 SV=1	HUMAN	8	tr	J3KPS3	J3KPS3_HUMAN
50	11.81	11.81	20.68	14.02	12.99	sp|Q08380|LG3BP_HUMAN	Galectin-3-binding protein OS=Homo sapiens GN=LGALS3BP PE=1 SV=1	HUMAN	7	sp	Q08380	LG3BP_HUMAN
138	3.53	3.53	30.88	24.26	18.38	sp|P47929|LEG7_HUMAN	Galectin-7 OS=Homo sapiens GN=LGALS7 PE=1 SV=2	HUMAN	2	sp	P47929	LEG7_HUMAN
145	3.32	3.32	16.06	5.699	5.699	sp|P17900|SAP3_HUMAN	Ganglioside GM2 activator OS=Homo sapiens GN=GM2A PE=1 SV=4	HUMAN	2	sp	P17900	SAP3_HUMAN
96	5.11	5.11	19.55	5.393	5.393	sp|Q96QA5|GSDMA_HUMAN	Gasdermin-A OS=Homo sapiens GN=GSDMA PE=1 SV=4	HUMAN	3	sp	Q96QA5	GSDMA_HUMAN
170	2.27	2.94	13.32	9.045	5.528	sp|P07093|GDN_HUMAN	Glia-derived nexin OS=Homo sapiens GN=SERPINE2 PE=1 SV=1	HUMAN	2	sp	P07093	GDN_HUMAN
46	12.34	12.34	25.65	18.32	16.75	tr|A0A0A0MTS2|A0A0A0MTS2_HUMAN	Glucose-6-phosphate isomerase (Fragment) OS=Homo sapiens GN=GPI PE=1 SV=1	HUMAN	9	tr	A0A0A0MTS2	A0A0A0MTS2_HUMAN
241	1.4	1.4	10.65	7.664	3.738	tr|K7ELL7|K7ELL7_HUMAN	Glucosidase 2 subunit beta OS=Homo sapiens GN=PRKCSH PE=1 SV=1	HUMAN	2	tr	K7ELL7	K7ELL7_HUMAN
179	2.08	2.09	9.283	6.54	4.641	sp|P48637|GSHB_HUMAN	Glutathione synthetase OS=Homo sapiens GN=GSS PE=1 SV=1	HUMAN	2	sp	P48637	GSHB_HUMAN
98	5.03	5.03	47.46	41.19	18.21	sp|P04406|G3P_HUMAN	Glyceraldehyde-3-phosphate dehydrogenase OS=Homo sapiens GN=GAPDH PE=1 SV=3	HUMAN	4	sp	P04406	G3P_HUMAN
122	4.01	4.01	5.207	1.736	1.736	sp|Q5JWF2|GNAS1_HUMAN	Guanine nucleotide-binding protein G(s) subunit alpha isoforms XLas OS=Homo sapiens GN=GNAS PE=1 SV=2	HUMAN	2	sp	Q5JWF2	GNAS1_HUMAN
186	2.04	9.78	15.6	9.204	9.204	sp|P08107|HSP71_HUMAN	Heat shock 70 kDa protein 1A/1B OS=Homo sapiens GN=HSPA1A PE=1 SV=5	HUMAN	5	sp	P08107	HSP71_HUMAN
60	9.31	13.2	31.42	17.34	13.16	sp|P11142|HSP7C_HUMAN	Heat shock cognate 71 kDa protein OS=Homo sapiens GN=HSPA8 PE=1 SV=1	HUMAN	7	sp	P11142	HSP7C_HUMAN
146	3.27	3.27	29.58	29.58	24.65	sp|P69905|HBA_HUMAN	Hemoglobin subunit alpha OS=Homo sapiens GN=HBA1 PE=1 SV=2	HUMAN	3	sp	P69905	HBA_HUMAN
86	6	6	27.89	15.65	15.65	sp|P68871|HBB_HUMAN	Hemoglobin subunit beta OS=Homo sapiens GN=HBB PE=1 SV=2	HUMAN	6	sp	P68871	HBB_HUMAN
153	3.02	3.02	53.17	23.02	15.87	sp|Q99880|H2B1L_HUMAN	Histone H2B type 1-L OS=Homo sapiens GN=HIST1H2BL PE=1 SV=3	HUMAN	3	sp	Q99880	H2B1L_HUMAN
212	1.82	1.82	41.18	24.26	11.76	sp|Q16695|H31T_HUMAN	Histone H3.1t OS=Homo sapiens GN=HIST3H3 PE=1 SV=3	HUMAN	2	sp	Q16695	H31T_HUMAN
95	5.13	5.13	51.46	41.75	41.75	sp|P62805|H4_HUMAN	Histone H4 OS=Homo sapiens GN=HIST1H4A PE=1 SV=2	HUMAN	4	sp	P62805	H4_HUMAN
109	4.47	4.47	16.91	5.708	5.708	tr|A0A087X079|A0A087X079_HUMAN	Ig gamma-1 chain C region OS=Homo sapiens GN=IGHG1 PE=1 SV=1	HUMAN	3	tr	A0A087X079	A0A087X079_HUMAN
151	3.04	3.04	16.02	12.55	12.55	tr|A0A087X130|A0A087X130_HUMAN	Ig kappa chain C region OS=Homo sapiens GN=IGKC PE=1 SV=1	HUMAN	2	tr	A0A087X130	A0A087X130_HUMAN
57	9.8	9.8	16.59	14.95	14.95	sp|O14498|ISLR_HUMAN	Immunoglobulin superfamily containing leucine-rich repeat protein OS=Homo sapiens GN=ISLR PE=1 SV=1	HUMAN	5	sp	O14498	ISLR_HUMAN
166	2.37	2.74	9.622	9.622	4.467	sp|P17936|IBP3_HUMAN	Insulin-like growth factor-binding protein 3 OS=Homo sapiens GN=IGFBP3 PE=1 SV=2	HUMAN	2	sp	P17936	IBP3_HUMAN
105	4.68	4.68	10.83	7.083	7.083	sp|P24592|IBP6_HUMAN	Insulin-like growth factor-binding protein 6 OS=Homo sapiens GN=IGFBP6 PE=1 SV=1	HUMAN	3	sp	P24592	IBP6_HUMAN
66	8	8	32.27	21.28	21.28	sp|Q16270|IBP7_HUMAN	Insulin-like growth factor-binding protein 7 OS=Homo sapiens GN=IGFBP7 PE=1 SV=1	HUMAN	4	sp	Q16270	IBP7_HUMAN
120	4.03	4.03	5.775	2.781	2.781	tr|Q5T985|Q5T985_HUMAN	Inter-alpha-trypsin inhibitor heavy chain H2 OS=Homo sapiens GN=ITIH2 PE=1 SV=1	HUMAN	2	tr	Q5T985	Q5T985_HUMAN
180	2.07	2.07	12.09	6.418	4.776	tr|A0A087WW43|A0A087WW43_HUMAN	Inter-alpha-trypsin inhibitor heavy chain H3 OS=Homo sapiens GN=ITIH3 PE=1 SV=1	HUMAN	3	tr	A0A087WW43	A0A087WW43_HUMAN
53	10.42	10.42	22.82	11.81	10.6	sp|P14923|PLAK_HUMAN	Junction plakoglobin OS=Homo sapiens GN=JUP PE=1 SV=3	HUMAN	6	sp	P14923	PLAK_HUMAN
302	0.59	0.61	10.27	3.125	3.125	sp|Q14532|K1H2_HUMAN	Keratin, type I cuticular Ha2 OS=Homo sapiens GN=KRT32 PE=1 SV=3	HUMAN	3	sp	Q14532	K1H2_HUMAN
4	93.88	95.8	73.63	64.73	64.73	sp|P13645|K1C10_HUMAN	Keratin, type I cytoskeletal 10 OS=Homo sapiens GN=KRT10 PE=1 SV=6	HUMAN	119	sp	P13645	K1C10_HUMAN
42	12.92	27.14	52.18	33.41	29.48	sp|P13646|K1C13_HUMAN	Keratin, type I cytoskeletal 13 OS=Homo sapiens GN=KRT13 PE=1 SV=4	HUMAN	24	sp	P13646	K1C13_HUMAN
7	63.01	73.05	71.82	61.86	56.14	sp|P02533|K1C14_HUMAN	Keratin, type I cytoskeletal 14 OS=Homo sapiens GN=KRT14 PE=1 SV=4	HUMAN	55	sp	P02533	K1C14_HUMAN
23	22.2	58.51	67.23	58.14	50.32	sp|P08779|K1C16_HUMAN	Keratin, type I cytoskeletal 16 OS=Homo sapiens GN=KRT16 PE=1 SV=4	HUMAN	40	sp	P08779	K1C16_HUMAN
61	8.8	41.44	64.58	47.22	36.11	sp|Q04695|K1C17_HUMAN	Keratin, type I cytoskeletal 17 OS=Homo sapiens GN=KRT17 PE=1 SV=2	HUMAN	30	sp	Q04695	K1C17_HUMAN
250	1.24	22.5	30.5	23.5	18.5	sp|P08727|K1C19_HUMAN	Keratin, type I cytoskeletal 19 OS=Homo sapiens GN=KRT19 PE=1 SV=4	HUMAN	20	sp	P08727	K1C19_HUMAN
6	79.22	82.27	80.74	73.68	72.55	sp|P35527|K1C9_HUMAN	Keratin, type I cytoskeletal 9 OS=Homo sapiens GN=KRT9 PE=1 SV=3	HUMAN	77	sp	P35527	K1C9_HUMAN
3	143.41	143.41	75.31	72.52	71.89	sp|P04264|K2C1_HUMAN	Keratin, type II cytoskeletal 1 OS=Homo sapiens GN=KRT1 PE=1 SV=6	HUMAN	167	sp	P04264	K2C1_HUMAN
43	12.79	28.63	42.91	29.24	24.57	sp|Q7Z794|K2C1B_HUMAN	Keratin, type II cytoskeletal 1b OS=Homo sapiens GN=KRT77 PE=2 SV=3	HUMAN	20	sp	Q7Z794	K2C1B_HUMAN
5	87.27	107.41	82.47	80.13	77.93	sp|P35908|K22E_HUMAN	Keratin, type II cytoskeletal 2 epidermal OS=Homo sapiens GN=KRT2 PE=1 SV=2	HUMAN	83	sp	P35908	K22E_HUMAN
292	0.67	10.71	36.14	13.48	11.24	sp|P19013|K2C4_HUMAN	Keratin, type II cytoskeletal 4 OS=Homo sapiens GN=KRT4 PE=1 SV=4	HUMAN	8	sp	P19013	K2C4_HUMAN
8	56.88	77.01	63.22	55.42	54.07	sp|P13647|K2C5_HUMAN	Keratin, type II cytoskeletal 5 OS=Homo sapiens GN=KRT5 PE=1 SV=3	HUMAN	56	sp	P13647	K2C5_HUMAN
194	2	59.37	61.52	48.76	48.76	sp|P02538|K2C6A_HUMAN	Keratin, type II cytoskeletal 6A OS=Homo sapiens GN=KRT6A PE=1 SV=3	HUMAN	56	sp	P02538	K2C6A_HUMAN
163	2.39	58.04	60.64	48.58	46.99	sp|P04259|K2C6B_HUMAN	Keratin, type II cytoskeletal 6B OS=Homo sapiens GN=KRT6B PE=1 SV=5	HUMAN	55	sp	P04259	K2C6B_HUMAN
25	21.12	59.37	61.88	48.76	48.76	sp|P48668|K2C6C_HUMAN	Keratin, type II cytoskeletal 6C OS=Homo sapiens GN=KRT6C PE=1 SV=3	HUMAN	56	sp	P48668	K2C6C_HUMAN
32	17.19	22.65	45.77	27.69	25.96	sp|Q8N1N4|K2C78_HUMAN	Keratin, type II cytoskeletal 78 OS=Homo sapiens GN=KRT78 PE=2 SV=2	HUMAN	17	sp	Q8N1N4	K2C78_HUMAN
78	6.96	9.13	36.73	17.04	12.83	sp|Q6KB66|K2C80_HUMAN	Keratin, type II cytoskeletal 80 OS=Homo sapiens GN=KRT80 PE=1 SV=2	HUMAN	6	sp	Q6KB66	K2C80_HUMAN
30	18.68	18.68	39.76	32.23	28.92	sp|P00338|LDHA_HUMAN	L-lactate dehydrogenase A chain OS=Homo sapiens GN=LDHA PE=1 SV=2	HUMAN	13	sp	P00338	LDHA_HUMAN
52	10.66	13.68	47.01	31.74	28.44	sp|P07195|LDHB_HUMAN	L-lactate dehydrogenase B chain OS=Homo sapiens GN=LDHB PE=1 SV=2	HUMAN	11	sp	P07195	LDHB_HUMAN
71	7.27	7.27	24.2	18.37	15.74	tr|F5GZN3|F5GZN3_HUMAN	Lactadherin OS=Homo sapiens GN=MFGE8 PE=1 SV=1	HUMAN	4	tr	F5GZN3	F5GZN3_HUMAN
62	8.67	8.67	23.73	13.56	9.181	tr|E7ER44|E7ER44_HUMAN	Lactotransferrin OS=Homo sapiens GN=LTF PE=1 SV=1	HUMAN	8	tr	E7ER44	E7ER44_HUMAN
124	4	4.06	11.45	2.203	1.872	tr|A0A0A0MTC7|A0A0A0MTC7_HUMAN	Laminin subunit alpha-4 OS=Homo sapiens GN=LAMA4 PE=1 SV=1	HUMAN	3	tr	A0A0A0MTC7	A0A0A0MTC7_HUMAN
90	5.74	6.71	13.76	3.591	3.591	tr|G3XAI2|G3XAI2_HUMAN	Laminin subunit beta-1 OS=Homo sapiens GN=LAMB1 PE=1 SV=1	HUMAN	6	tr	G3XAI2	G3XAI2_HUMAN
33	16.88	16.88	17.03	9.074	7.458	sp|P11047|LAMC1_HUMAN	Laminin subunit gamma-1 OS=Homo sapiens GN=LAMC1 PE=1 SV=3	HUMAN	10	sp	P11047	LAMC1_HUMAN
149	3.15	3.15	25	17.05	12.5	sp|P31025|LCN1_HUMAN	Lipocalin-1 OS=Homo sapiens GN=LCN1 PE=1 SV=1	HUMAN	2	sp	P31025	LCN1_HUMAN
127	3.97	3.97	29.29	11.24	9.763	sp|P51884|LUM_HUMAN	Lumican OS=Homo sapiens GN=LUM PE=1 SV=2	HUMAN	3	sp	P51884	LUM_HUMAN
139	3.45	3.45	28.38	28.38	14.19	sp|P61626|LYSC_HUMAN	Lysozyme C OS=Homo sapiens GN=LYZ PE=1 SV=1	HUMAN	3	sp	P61626	LYSC_HUMAN
89	5.84	5.84	25.15	13.17	13.17	sp|P40925|MDHC_HUMAN	Malate dehydrogenase, cytoplasmic OS=Homo sapiens GN=MDH1 PE=1 SV=4	HUMAN	4	sp	P40925	MDHC_HUMAN
97	5.1	5.1	21.68	21.68	16.78	tr|Q5H9A7|Q5H9A7_HUMAN	Metalloproteinase inhibitor 1 OS=Homo sapiens GN=TIMP1 PE=1 SV=1	HUMAN	3	tr	Q5H9A7	Q5H9A7_HUMAN
83	6.09	6.09	22.27	22.27	19.09	sp|P16035|TIMP2_HUMAN	Metalloproteinase inhibitor 2 OS=Homo sapiens GN=TIMP2 PE=1 SV=2	HUMAN	4	sp	P16035	TIMP2_HUMAN
26	20.49	20.49	54.94	30.16	19.41	sp|P26038|MOES_HUMAN	Moesin OS=Homo sapiens GN=MSN PE=1 SV=3	HUMAN	10	sp	P26038	MOES_HUMAN
N	Unused	Total	%Cov	%Cov(50)	%Cov(95)	Accession	Name	Species	Peptides(95%)	Accession			Molecular Function	PANTHER ID
142	3.34	3.34	7.782	3.636	1.964	sp|Q14112|NID2_HUMAN	Nidogen-2 OS=Homo sapiens GN=NID2 PE=1 SV=3	HUMAN	2	sp	Q14112	NID2_HUMAN
113	4.3	4.3	13.88	6.941	4.555	sp|Q02818|NUCB1_HUMAN	Nucleobindin-1 OS=Homo sapiens GN=NUCB1 PE=1 SV=4	HUMAN	2	sp	Q02818	NUCB1_HUMAN
221	1.62	6.8	40.79	40.79	40.79	sp|P15531|NDKA_HUMAN	Nucleoside diphosphate kinase A OS=Homo sapiens GN=NME1 PE=1 SV=1	HUMAN	5	sp	P15531	NDKA_HUMAN
75	7.09	7.09	43.15	36.3	36.3	tr|Q32Q12|Q32Q12_HUMAN	Nucleoside diphosphate kinase OS=Homo sapiens GN=NME1-NME2 PE=1 SV=1	HUMAN	6	tr	Q32Q12	Q32Q12_HUMAN
82	6.28	6.28	19.95	12.6	12.6	sp|P26022|PTX3_HUMAN	Pentraxin-related protein PTX3 OS=Homo sapiens GN=PTX3 PE=1 SV=3	HUMAN	4	sp	P26022	PTX3_HUMAN
107	4.59	4.59	27.27	13.33	7.879	sp|P62937|PPIA_HUMAN	Peptidyl-prolyl cis-trans isomerase A OS=Homo sapiens GN=PPIA PE=1 SV=2	HUMAN	2	sp	P62937	PPIA_HUMAN
44	12.61	12.61	56.48	51.39	39.81	sp|P23284|PPIB_HUMAN	Peptidyl-prolyl cis-trans isomerase B OS=Homo sapiens GN=PPIB PE=1 SV=2	HUMAN	11	sp	P23284	PPIB_HUMAN
77	6.98	7.31	20.54	11.88	7.797	tr|B1ALD9|B1ALD9_HUMAN	Periostin OS=Homo sapiens GN=POSTN PE=1 SV=1	HUMAN	5	tr	B1ALD9	B1ALD9_HUMAN
59	9.4	9.4	42.69	42.69	38.6	tr|A0A0A0MSI0|A0A0A0MSI0_HUMAN	Peroxiredoxin-1 (Fragment) OS=Homo sapiens GN=PRDX1 PE=1 SV=1	HUMAN	9	tr	A0A0A0MSI0	A0A0A0MSI0_HUMAN
132	3.71	5.75	30.81	22.22	18.18	sp|P32119|PRDX2_HUMAN	Peroxiredoxin-2 OS=Homo sapiens GN=PRDX2 PE=1 SV=5	HUMAN	6	sp	P32119	PRDX2_HUMAN
225	1.59	3.72	23.99	9.594	7.011	sp|Q13162|PRDX4_HUMAN	Peroxiredoxin-4 OS=Homo sapiens GN=PRDX4 PE=1 SV=1	HUMAN	2	sp	Q13162	PRDX4_HUMAN
114	4.3	4.3	25.13	19.25	19.25	sp|P30086|PEBP1_HUMAN	Phosphatidylethanolamine-binding protein 1 OS=Homo sapiens GN=PEBP1 PE=1 SV=3	HUMAN	3	sp	P30086	PEBP1_HUMAN
262	1.02	1.65	18.5	10.24	6.299	sp|P18669|PGAM1_HUMAN	Phosphoglycerate mutase 1 OS=Homo sapiens GN=PGAM1 PE=1 SV=2	HUMAN	2	sp	P18669	PGAM1_HUMAN
115	4.27	4.27	26.22	9.189	6.216	sp|Q9Y617|SERC_HUMAN	Phosphoserine aminotransferase OS=Homo sapiens GN=PSAT1 PE=1 SV=2	HUMAN	2	sp	Q9Y617	SERC_HUMAN
31	18.55	18.55	34.45	29.43	25.6	sp|P36955|PEDF_HUMAN	Pigment epithelium-derived factor OS=Homo sapiens GN=SERPINF1 PE=1 SV=4	HUMAN	11	sp	P36955	PEDF_HUMAN
167	2.35	2.35	10.87	3.315	3.315	tr|E9PGN7|E9PGN7_HUMAN	Plasma protease C1 inhibitor OS=Homo sapiens GN=SERPING1 PE=1 SV=1	HUMAN	2	tr	E9PGN7	E9PGN7_HUMAN
393	0.12	0.52	4.926	3.448	3.202	sp|P05154|IPSP_HUMAN	Plasma serine protease inhibitor OS=Homo sapiens GN=SERPINA5 PE=1 SV=3	HUMAN	2	sp	P05154	IPSP_HUMAN
14	37.29	37.29	63.93	57.46	54.98	sp|P05121|PAI1_HUMAN	Plasminogen activator inhibitor 1 OS=Homo sapiens GN=SERPINE1 PE=1 SV=1	HUMAN	35	sp	P05121	PAI1_HUMAN
195	2	8.39	7.287	3.171	3.171	sp|P20742|PZP_HUMAN	Pregnancy zone protein OS=Homo sapiens GN=PZP PE=1 SV=4	HUMAN	5	sp	P20742	PZP_HUMAN
148	3.21	3.21	20.03	6.928	3.012	sp|P02545|LMNA_HUMAN	Prelamin-A/C OS=Homo sapiens GN=LMNA PE=1 SV=1	HUMAN	2	sp	P02545	LMNA_HUMAN
54	10.34	10.34	30.07	20.27	18.93	sp|Q15113|PCOC1_HUMAN	Procollagen C-endopeptidase enhancer 1 OS=Homo sapiens GN=PCOLCE PE=1 SV=2	HUMAN	8	sp	Q15113	PCOC1_HUMAN
64	8.34	8.34	57.86	57.86	57.86	sp|P07737|PROF1_HUMAN	Profilin-1 OS=Homo sapiens GN=PFN1 PE=1 SV=2	HUMAN	7	sp	P07737	PROF1_HUMAN
152	3.03	3.03	21.43	12.7	8.73	tr|G3V5Z7|G3V5Z7_HUMAN	Proteasome subunit alpha type OS=Homo sapiens GN=PSMA6 PE=1 SV=1	HUMAN	2	tr	G3V5Z7	G3V5Z7_HUMAN
210	1.86	1.86	24.79	14.1	8.974	sp|P25787|PSA2_HUMAN	Proteasome subunit alpha type-2 OS=Homo sapiens GN=PSMA2 PE=1 SV=2	HUMAN	2	sp	P25787	PSA2_HUMAN
137	3.57	3.57	20.39	15.29	11.76	sp|P25788|PSA3_HUMAN	Proteasome subunit alpha type-3 OS=Homo sapiens GN=PSMA3 PE=1 SV=2	HUMAN	3	sp	P25788	PSA3_HUMAN
85	6.04	6.04	21.07	17.62	15.33	sp|P25789|PSA4_HUMAN	Proteasome subunit alpha type-4 OS=Homo sapiens GN=PSMA4 PE=1 SV=1	HUMAN	4	sp	P25789	PSA4_HUMAN
117	4.18	4.18	20.33	20.33	17.43	sp|P28066|PSA5_HUMAN	Proteasome subunit alpha type-5 OS=Homo sapiens GN=PSMA5 PE=1 SV=3	HUMAN	3	sp	P28066	PSA5_HUMAN
111	4.32	4.32	38.31	19.35	12.5	sp|O14818|PSA7_HUMAN	Proteasome subunit alpha type-7 OS=Homo sapiens GN=PSMA7 PE=1 SV=1	HUMAN	3	sp	O14818	PSA7_HUMAN
104	4.76	4.76	37.76	26.14	22.41	sp|P20618|PSB1_HUMAN	Proteasome subunit beta type-1 OS=Homo sapiens GN=PSMB1 PE=1 SV=2	HUMAN	4	sp	P20618	PSB1_HUMAN
232	1.53	1.53	27.86	16.42	16.42	sp|P49721|PSB2_HUMAN	Proteasome subunit beta type-2 OS=Homo sapiens GN=PSMB2 PE=1 SV=1	HUMAN	4	sp	P49721	PSB2_HUMAN
154	3.01	3.01	18.56	14.77	11.36	sp|P28070|PSB4_HUMAN	Proteasome subunit beta type-4 OS=Homo sapiens GN=PSMB4 PE=1 SV=4	HUMAN	3	sp	P28070	PSB4_HUMAN
72	7.21	7.21	47.15	25.48	15.97	sp|P28074|PSB5_HUMAN	Proteasome subunit beta type-5 OS=Homo sapiens GN=PSMB5 PE=1 SV=3	HUMAN	5	sp	P28074	PSB5_HUMAN
93	5.44	5.44	28.45	20.92	20.92	sp|P28072|PSB6_HUMAN	Proteasome subunit beta type-6 OS=Homo sapiens GN=PSMB6 PE=1 SV=4	HUMAN	4	sp	P28072	PSB6_HUMAN
131	3.72	3.72	24.86	21.55	12.71	tr|F8WCF6|F8WCF6_HUMAN	Protein ARPC4-TTLL3 OS=Homo sapiens GN=ARPC4-TTLL3 PE=1 SV=1	HUMAN	2	tr	F8WCF6	F8WCF6_HUMAN
16	32.83	32.83	46.73	38.42	38.42	sp|P30101|PDIA3_HUMAN	Protein disulfide-isomerase A3 OS=Homo sapiens GN=PDIA3 PE=1 SV=4	HUMAN	18	sp	P30101	PDIA3_HUMAN
47	12.1	12.8	27.29	16.59	12.09	sp|P13667|PDIA4_HUMAN	Protein disulfide-isomerase A4 OS=Homo sapiens GN=PDIA4 PE=1 SV=2	HUMAN	7	sp	P13667	PDIA4_HUMAN
29	18.76	18.76	47.24	31.69	27.76	sp|P07237|PDIA1_HUMAN	Protein disulfide-isomerase OS=Homo sapiens GN=P4HB PE=1 SV=3	HUMAN	12	sp	P07237	PDIA1_HUMAN
110	4.47	4.47	26.67	26.67	26.67	sp|P31949|S10AB_HUMAN	Protein S100-A11 OS=Homo sapiens GN=S100A11 PE=1 SV=2	HUMAN	4	sp	P31949	S10AB_HUMAN
175	2.1	2.11	44.09	26.88	19.35	sp|P05109|S10A8_HUMAN	Protein S100-A8 OS=Homo sapiens GN=S100A8 PE=1 SV=1	HUMAN	2	sp	P05109	S10A8_HUMAN
182	2.06	2.06	51.75	24.56	24.56	sp|P06702|S10A9_HUMAN	Protein S100-A9 OS=Homo sapiens GN=S100A9 PE=1 SV=1	HUMAN	2	sp	P06702	S10A9_HUMAN
67	7.73	7.73	25.69	11.83	8.658	sp|Q08188|TGM3_HUMAN	Protein-glutamine gamma-glutamyltransferase E OS=Homo sapiens GN=TGM3 PE=1 SV=4	HUMAN	5	sp	Q08188	TGM3_HUMAN
100	4.95	4.95	41.87	23.53	16.61	sp|P00491|PNPH_HUMAN	Purine nucleoside phosphorylase OS=Homo sapiens GN=PNP PE=1 SV=2	HUMAN	4	sp	P00491	PNPH_HUMAN
219	1.65	1.65	20.9	6.292	4.494	sp|P50395|GDIB_HUMAN	Rab GDP dissociation inhibitor beta OS=Homo sapiens GN=GDI2 PE=1 SV=2	HUMAN	2	sp	P50395	GDIB_HUMAN
92	5.51	5.51	18.43	13.29	13.29	sp|Q15293|RCN1_HUMAN	Reticulocalbin-1 OS=Homo sapiens GN=RCN1 PE=1 SV=1	HUMAN	4	sp	Q15293	RCN1_HUMAN
74	7.2	7.2	16.16	16.16	15.55	sp|Q96D15|RCN3_HUMAN	Reticulocalbin-3 OS=Homo sapiens GN=RCN3 PE=1 SV=1	HUMAN	4	sp	Q96D15	RCN3_HUMAN
155	2.89	3.25	4.941	0.711	0.5332	RRRRRsp|Q12802|AKP13_HUMAN	REVERSED A-kinase anchor protein 13 OS=Homo sapiens GN=AKAP13 PE=1 SV=2	HUMAN	2	RRRRRsp	Q12802	AKP13_HUMAN
41	13.01	13.06	19.37	14.41	13.21	sp|O75326|SEM7A_HUMAN	Semaphorin-7A OS=Homo sapiens GN=SEMA7A PE=1 SV=1	HUMAN	7	sp	O75326	SEM7A_HUMAN
45	12.56	12.56	31.85	28.89	26.67	sp|Q96P63|SPB12_HUMAN	Serpin B12 OS=Homo sapiens GN=SERPINB12 PE=1 SV=1	HUMAN	8	sp	Q96P63	SPB12_HUMAN
73	7.2	7.2	30.51	19.49	17.69	sp|P29508|SPB3_HUMAN	Serpin B3 OS=Homo sapiens GN=SERPINB3 PE=1 SV=2	HUMAN	6	sp	P29508	SPB3_HUMAN
130	3.73	3.73	24.81	8.354	6.329	tr|A0A087X1N8|A0A087X1N8_HUMAN	Serpin B6 OS=Homo sapiens GN=SERPINB6 PE=1 SV=1	HUMAN	2	tr	A0A087X1N8	A0A087X1N8_HUMAN
307	0.55	2.22	19.25	8.824	6.684	sp|P50452|SPB8_HUMAN	Serpin B8 OS=Homo sapiens GN=SERPINB8 PE=1 SV=2	HUMAN	2	sp	P50452	SPB8_HUMAN
21	25.67	25.67	42.04	23.32	19.7	sp|P02768|ALBU_HUMAN	Serum albumin OS=Homo sapiens GN=ALB PE=1 SV=2	HUMAN	31	sp	P02768	ALBU_HUMAN
34	15.8	15.8	28.57	20.63	20.63	tr|D3DQH8|D3DQH8_HUMAN	SPARC OS=Homo sapiens GN=SPARC PE=1 SV=1	HUMAN	17	tr	D3DQH8	D3DQH8_HUMAN
81	6.47	6.47	26.1	11.24	7.497	sp|O00391|QSOX1_HUMAN	Sulfhydryl oxidase 1 OS=Homo sapiens GN=QSOX1 PE=1 SV=3	HUMAN	6	sp	O00391	QSOX1_HUMAN
240	1.41	1.41	19.05	10.48	10.48	sp|P10599|THIO_HUMAN	Thioredoxin OS=Homo sapiens GN=TXN PE=1 SV=3	HUMAN	2	sp	P10599	THIO_HUMAN
12	39.15	39.15	29.83	20.17	18.29	sp|P07996|TSP1_HUMAN	Thrombospondin-1 OS=Homo sapiens GN=THBS1 PE=1 SV=2	HUMAN	23	sp	P07996	TSP1_HUMAN
116	4.23	4.23	24.04	16.62	5.935	sp|P37837|TALDO_HUMAN	Transaldolase OS=Homo sapiens GN=TALDO1 PE=1 SV=2	HUMAN	2	sp	P37837	TALDO_HUMAN
35	15.73	15.73	30.6	19.77	14.2	sp|Q15582|BGH3_HUMAN	Transforming growth factor-beta-induced protein ig-h3 OS=Homo sapiens GN=TGFBI PE=1 SV=1	HUMAN	8	sp	Q15582	BGH3_HUMAN
70	7.29	7.29	45.27	25.37	25.37	sp|Q01995|TAGL_HUMAN	Transgelin OS=Homo sapiens GN=TAGLN PE=1 SV=4	HUMAN	7	sp	Q01995	TAGL_HUMAN
147	3.24	3.24	21.93	17.11	17.11	tr|X6RJP6|X6RJP6_HUMAN	Transgelin-2 (Fragment) OS=Homo sapiens GN=TAGLN2 PE=1 SV=1	HUMAN	3	tr	X6RJP6	X6RJP6_HUMAN
56	9.95	9.95	22.31	12.84	12.84	sp|P29401|TKT_HUMAN	Transketolase OS=Homo sapiens GN=TKT PE=1 SV=3	HUMAN	5	sp	P29401	TKT_HUMAN
69	7.46	7.46	28.06	23.74	23.74	tr|A0A087WV45|A0A087WV45_HUMAN	Transthyretin OS=Homo sapiens GN=TTR PE=1 SV=1	HUMAN	8	tr	A0A087WV45	A0A087WV45_HUMAN
38	14.19	14.19	46.5	31.47	29.02	sp|P60174|TPIS_HUMAN	Triosephosphate isomerase OS=Homo sapiens GN=TPI1 PE=1 SV=3	HUMAN	11	sp	P60174	TPIS_HUMAN
88	5.87	5.87	36.81	10.74	10.74	tr|Q6ZN40|Q6ZN40_HUMAN	Tropomyosin 1 (Alpha), isoform CRA_f OS=Homo sapiens GN=TPM1 PE=1 SV=1	HUMAN	3	tr	Q6ZN40	Q6ZN40_HUMAN
102	4.79	4.79	37.57	31.21	27.75	sp|Q969H8|CS010_HUMAN	UPF0556 protein C19orf10 OS=Homo sapiens GN=C19orf10 PE=1 SV=1	HUMAN	4	sp	Q969H8	CS010_HUMAN
133	3.7	3.71	11	5.646	3.715	sp|Q6EMK4|VASN_HUMAN	Vasorin OS=Homo sapiens GN=VASN PE=1 SV=1	HUMAN	2	sp	Q6EMK4	VASN_HUMAN
79	6.59	7.93	36.66	18.1	15.55	tr|B0YJC4|B0YJC4_HUMAN	Vimentin OS=Homo sapiens GN=VIM PE=1 SV=1	HUMAN	6	tr	B0YJC4	B0YJC4_HUMAN
135	3.65	3.65	19.93	3.792	2.91	sp|P18206|VINC_HUMAN	Vinculin OS=Homo sapiens GN=VCL PE=1 SV=4	HUMAN	3	sp	P18206	VINC_HUMAN
119	4.04	4.04	27.18	11.41	7.383	sp|P25311|ZA2G_HUMAN	Zinc-alpha-2-glycoprotein OS=Homo sapiens GN=AZGP1 PE=1 SV=2	HUMAN	2	sp	P25311	ZA2G_HUMAN

## Sheet: BM MSC sample 150525
N	Unused	Total	%Cov	%Cov(50)	%Cov(95)	Accession	Name	Species	Peptides(95%)			PANTHER ID
367	4.01	4.01	12.96	6.553	6.553	sp|Q04446|GLGB_HUMAN	1,4-alpha-glucan-branching enzyme OS=Homo sapiens GN=GBE1 PE=1 SV=3	HUMAN	3		P02751
376	3.98	4	71.57	44.12	30.39	sp|P61604|CH10_HUMAN	10 kDa heat shock protein, mitochondrial OS=Homo sapiens GN=HSPE1 PE=1 SV=2	HUMAN	3		Q99715
272	6.05	8.48	67.48	33.33	25.2	sp|P31946|1433B_HUMAN	14-3-3 protein beta/alpha OS=Homo sapiens GN=YWHAB PE=1 SV=3	HUMAN	6		P08123
338	4.51	6.31	49.41	33.33	21.18	sp|P62258|1433E_HUMAN	14-3-3 protein epsilon OS=Homo sapiens GN=YWHAE PE=1 SV=1	HUMAN	6		P12111
214	7.8	10.43	45.53	34.15	26.02	sp|Q04917|1433F_HUMAN	14-3-3 protein eta OS=Homo sapiens GN=YWHAH PE=1 SV=4	HUMAN	7		P02452
580	1.96	3.9	39.68	21.05	12.96	sp|P61981|1433G_HUMAN	14-3-3 protein gamma OS=Homo sapiens GN=YWHAG PE=1 SV=2	HUMAN	4		P21333
352	4.14	6.46	48.16	31.43	20.82	sp|P27348|1433T_HUMAN	14-3-3 protein theta OS=Homo sapiens GN=YWHAQ PE=1 SV=1	HUMAN	5		P02461
127	14.25	14.25	53.66	46.34	38.21	tr|E7EX29|E7EX29_HUMAN	14-3-3 protein zeta/delta (Fragment) OS=Homo sapiens GN=YWHAZ PE=1 SV=1	HUMAN	10		P04264
390	3.61	3.61	17.42	17.42	17.42	sp|O00487|PSDE_HUMAN	26S proteasome non-ATPase regulatory subunit 14 OS=Homo sapiens GN=PSMD14 PE=1 SV=1	HUMAN	3		Q15063
423	3.17	3.19	4.405	3.084	3.084	sp|Q13200|PSMD2_HUMAN	26S proteasome non-ATPase regulatory subunit 2 OS=Homo sapiens GN=PSMD2 PE=1 SV=3	HUMAN	2		A0A0A0MTC7
466	2.56	2.56	24.38	10.8	10.8	sp|P51665|PSMD7_HUMAN	26S proteasome non-ATPase regulatory subunit 7 OS=Homo sapiens GN=PSMD7 PE=1 SV=2	HUMAN	2		Q15582
441	2.95	2.95	30.18	13.06	8.559	tr|J3KN29|J3KN29_HUMAN	26S proteasome non-ATPase regulatory subunit 9 OS=Homo sapiens GN=PSMD9 PE=1 SV=1	HUMAN	2		P08253
759	0.59	1.71	21.61	5.861	5.861	tr|B8ZZZ0|B8ZZZ0_HUMAN	3-hydroxyisobutyryl-CoA hydrolase, mitochondrial (Fragment) OS=Homo sapiens GN=HIBCH PE=1 SV=1	HUMAN	2		P07996
308	5.09	5.09	53.79	45.45	30.3	sp|P25398|RS12_HUMAN	40S ribosomal protein S12 OS=Homo sapiens GN=RPS12 PE=1 SV=3	HUMAN	4		A0A087X0S5
324	4.81	4.81	37.75	21.19	15.23	sp|P62277|RS13_HUMAN	40S ribosomal protein S13 OS=Homo sapiens GN=RPS13 PE=1 SV=2	HUMAN	3		P05121
252	6.45	6.45	33.11	30.46	29.8	sp|P62263|RS14_HUMAN	40S ribosomal protein S14 OS=Homo sapiens GN=RPS14 PE=1 SV=3	HUMAN	3		P13645
644	1.35	1.35	53	45	18	tr|I3L3P7|I3L3P7_HUMAN	40S ribosomal protein S15a OS=Homo sapiens GN=RPS15A PE=1 SV=1	HUMAN	2		G3XAI2
154	11.17	11.17	53.95	47.37	47.37	sp|P62269|RS18_HUMAN	40S ribosomal protein S18 OS=Homo sapiens GN=RPS18 PE=1 SV=3	HUMAN	8		P08670
236	7.02	7.02	35.86	17.93	17.93	sp|P39019|RS19_HUMAN	40S ribosomal protein S19 OS=Homo sapiens GN=RPS19 PE=1 SV=2	HUMAN	4		Q92626
284	5.82	5.82	22.69	22.69	22.69	sp|P60866|RS20_HUMAN	40S ribosomal protein S20 OS=Homo sapiens GN=RPS20 PE=1 SV=1	HUMAN	3		P26038
255	6.39	6.39	61.73	54.32	54.32	tr|Q8WVC2|Q8WVC2_HUMAN	40S ribosomal protein S21 OS=Homo sapiens GN=RPS21 PE=1 SV=1	HUMAN	4		P35908
341	4.46	4.46	43.2	20.8	20.8	sp|P62851|RS25_HUMAN	40S ribosomal protein S25 OS=Homo sapiens GN=RPS25 PE=1 SV=1	HUMAN	3		P20908
319	4.89	4.89	40.58	36.23	36.23	sp|P62857|RS28_HUMAN	40S ribosomal protein S28 OS=Homo sapiens GN=RPS28 PE=1 SV=1	HUMAN	4		P11047
110	16.35	16.35	57.2	44.44	41.15	sp|P23396|RS3_HUMAN	40S ribosomal protein S3 OS=Homo sapiens GN=RPS3 PE=1 SV=2	HUMAN	9		P11142
440	2.95	2.95	40.72	14.43	10.31	sp|P62081|RS7_HUMAN	40S ribosomal protein S7 OS=Homo sapiens GN=RPS7 PE=1 SV=1	HUMAN	2		P08572
249	6.63	6.63	38.98	26.1	20.68	sp|P08865|RSSA_HUMAN	40S ribosomal protein SA OS=Homo sapiens GN=RPSA PE=1 SV=4	HUMAN	4		P07355
160	10.91	10.91	40.06	31.22	22.65	sp|Q9BRK5|CAB45_HUMAN	45 kDa calcium-binding protein OS=Homo sapiens GN=SDF4 PE=1 SV=1	HUMAN	8		P12110
499	2.19	2.19	14.81	9.756	8.188	sp|P21589|5NTD_HUMAN	5'-nucleotidase OS=Homo sapiens GN=NT5E PE=1 SV=1	HUMAN	3		O43707
171	10.19	10.19	35.25	15.88	15.36	sp|P10809|CH60_HUMAN	60 kDa heat shock protein, mitochondrial OS=Homo sapiens GN=HSPD1 PE=1 SV=2	HUMAN	8		Q02818
158	10.95	10.95	36.28	30.91	29.02	sp|P05388|RLA0_HUMAN	60S acidic ribosomal protein P0 OS=Homo sapiens GN=RPLP0 PE=1 SV=1	HUMAN	6		P07093
465	2.57	2.57	19.3	19.3	19.3	sp|P05386|RLA1_HUMAN	60S acidic ribosomal protein P1 OS=Homo sapiens GN=RPLP1 PE=1 SV=1	HUMAN	2		P06733
226	7.43	7.43	82.61	62.61	62.61	sp|P05387|RLA2_HUMAN	60S acidic ribosomal protein P2 OS=Homo sapiens GN=RPLP2 PE=1 SV=1	HUMAN	5		P00338
463	2.58	2.58	30.41	12.44	12.44	sp|P62906|RL10A_HUMAN	60S ribosomal protein L10a OS=Homo sapiens GN=RPL10A PE=1 SV=2	HUMAN	3		P30101
311	5.02	5.02	55.06	20.79	16.85	sp|P62913|RL11_HUMAN	60S ribosomal protein L11 OS=Homo sapiens GN=RPL11 PE=1 SV=2	HUMAN	3		J3KPS3
258	6.36	6.36	45.45	28.48	24.24	sp|P30050|RL12_HUMAN	60S ribosomal protein L12 OS=Homo sapiens GN=RPL12 PE=1 SV=1	HUMAN	4		P05997
480	2.41	2.41	38.95	32.63	26.32	tr|K7ERI7|K7ERI7_HUMAN	60S ribosomal protein L22 OS=Homo sapiens GN=RPL22 PE=1 SV=1	HUMAN	2		P63261
373	4	4	32.35	12.5	12.5	sp|P61353|RL27_HUMAN	60S ribosomal protein L27 OS=Homo sapiens GN=RPL27 PE=1 SV=2	HUMAN	2		P14618
415	3.29	3.29	38.39	16.07	16.07	tr|H0YMF4|H0YMF4_HUMAN	60S ribosomal protein L28 OS=Homo sapiens GN=RPL28 PE=1 SV=1	HUMAN	2		O00391
694	0.93	0.93	21.05	21.05	15.79	tr|E5RI99|E5RI99_HUMAN	60S ribosomal protein L30 (Fragment) OS=Homo sapiens GN=RPL30 PE=1 SV=1	HUMAN	2		P02545
626	1.58	1.58	29.09	20	12.73	sp|P18077|RL35A_HUMAN	60S ribosomal protein L35a OS=Homo sapiens GN=RPL35A PE=1 SV=2	HUMAN	2		G3V3X5
388	3.71	3.71	22.22	12.46	6.061	sp|P46777|RL5_HUMAN	60S ribosomal protein L5 OS=Homo sapiens GN=RPL5 PE=1 SV=3	HUMAN	2		Q01995
218	7.67	7.67	30.85	18.84	18.84	sp|P52209|6PGD_HUMAN	6-phosphogluconate dehydrogenase, decarboxylating OS=Homo sapiens GN=PGD PE=1 SV=3	HUMAN	5		P98160
12	78.79	78.79	79.24	75	62.42	sp|P08253|MMP2_HUMAN	72 kDa type IV collagenase OS=Homo sapiens GN=MMP2 PE=1 SV=2	HUMAN	93		P35527
49	35.01	40.27	57.03	47.71	44.5	sp|P11021|GRP78_HUMAN	78 kDa glucose-regulated protein OS=Homo sapiens GN=HSPA5 PE=1 SV=2	HUMAN	26		P50454
314	4.98	4.98	10.07	5.45	4.294	sp|O95450|ATS2_HUMAN	A disintegrin and metalloproteinase with thrombospondin motifs 2 OS=Homo sapiens GN=ADAMTS2 PE=2 SV=2	HUMAN	3		Q5TCU3
260	6.28	36.14	72.15	61.8	59.95	sp|P68133|ACTS_HUMAN	Actin, alpha skeletal muscle OS=Homo sapiens GN=ACTA1 PE=1 SV=1	HUMAN	33		P24821
36	45.88	45.88	79.2	71.2	68.8	sp|P63261|ACTG_HUMAN	Actin, cytoplasmic 2 OS=Homo sapiens GN=ACTG1 PE=1 SV=1	HUMAN	48		P18206
202	8.37	11.64	43.91	32.23	30.71	sp|P61160|ARP2_HUMAN	Actin-related protein 2 OS=Homo sapiens GN=ACTR2 PE=1 SV=1	HUMAN	10		O75369
361	4.03	6.05	22.04	15.32	12.1	sp|O15143|ARC1B_HUMAN	Actin-related protein 2/3 complex subunit 1B OS=Homo sapiens GN=ARPC1B PE=1 SV=3	HUMAN	4		P11021
95	18.17	18.17	78.67	71	48.33	sp|O15144|ARPC2_HUMAN	Actin-related protein 2/3 complex subunit 2 OS=Homo sapiens GN=ARPC2 PE=1 SV=1	HUMAN	11		Q76M96
235	7.05	7.05	45.51	35.96	19.66	sp|O15145|ARPC3_HUMAN	Actin-related protein 2/3 complex subunit 3 OS=Homo sapiens GN=ARPC3 PE=1 SV=3	HUMAN	4		Q5JP53
217	7.73	7.73	60.26	49.01	49.01	sp|O15511|ARPC5_HUMAN	Actin-related protein 2/3 complex subunit 5 OS=Homo sapiens GN=ARPC5 PE=1 SV=3	HUMAN	8		P03956
605	1.72	1.82	22.88	13.07	13.07	sp|Q9BPX5|ARP5L_HUMAN	Actin-related protein 2/3 complex subunit 5-like protein OS=Homo sapiens GN=ARPC5L PE=1 SV=1	HUMAN	2		P51884
182	9.71	9.71	40.19	26.08	21.53	sp|P61158|ARP3_HUMAN	Actin-related protein 3 OS=Homo sapiens GN=ACTR3 PE=1 SV=3	HUMAN	6		P08476
464	2.57	2.57	23.46	19.14	12.96	tr|H3BQB1|H3BQB1_HUMAN	Adenine phosphoribosyltransferase (Fragment) OS=Homo sapiens GN=APRT PE=1 SV=1	HUMAN	2		Q15113
175	10	10.04	54.76	36.67	27.14	tr|Q5T9B7|Q5T9B7_HUMAN	Adenylate kinase isoenzyme 1 OS=Homo sapiens GN=AK1 PE=1 SV=1	HUMAN	6		P04083
356	4.1	4.1	32	14.11	8.842	sp|Q01518|CAP1_HUMAN	Adenylyl cyclase-associated protein 1 OS=Homo sapiens GN=CAP1 PE=1 SV=5	HUMAN	2		Q16270
199	8.55	8.55	11.83	6.477	5.095	sp|Q8IUX7|AEBP1_HUMAN	Adipocyte enhancer-binding protein 1 OS=Homo sapiens GN=AEBP1 PE=1 SV=1	HUMAN	4		P13639
451	2.82	2.82	24.5	9.732	6.711	sp|P12236|ADT3_HUMAN	ADP/ATP translocase 3 OS=Homo sapiens GN=SLC25A6 PE=1 SV=4	HUMAN	2		P35442
590	1.88	6.11	64.64	56.35	27.07	sp|P84077|ARF1_HUMAN	ADP-ribosylation factor 1 OS=Homo sapiens GN=ARF1 PE=1 SV=2	HUMAN	5		P29401
268	6.15	6.15	48.33	30.56	27.22	sp|P18085|ARF4_HUMAN	ADP-ribosylation factor 4 OS=Homo sapiens GN=ARF4 PE=1 SV=3	HUMAN	5		Q06830
595	1.84	1.85	19.38	11.38	9.846	sp|P14550|AK1A1_HUMAN	Alcohol dehydrogenase [NADP(+)] OS=Homo sapiens GN=AKR1A1 PE=1 SV=3	HUMAN	2		P36955
591	1.88	1.88	35.24	16.67	16.67	sp|Q96IU4|ABHEB_HUMAN	Alpha/beta hydrolase domain-containing protein 14B OS=Homo sapiens GN=ABHD14B PE=1 SV=1	HUMAN	2		P23284
336	4.56	4.56	15.8	7.084	3.815	sp|P02765|FETUA_HUMAN	Alpha-2-HS-glycoprotein OS=Homo sapiens GN=AHSG PE=1 SV=1	HUMAN	10		P04406
190	9.41	9.42	13.98	8.209	4.817	sp|P01023|A2MG_HUMAN	Alpha-2-macroglobulin OS=Homo sapiens GN=A2M PE=1 SV=3	HUMAN	10		P36222
73	24.14	49.42	46.08	36.21	35.09	sp|P12814|ACTN1_HUMAN	Alpha-actinin-1 OS=Homo sapiens GN=ACTN1 PE=1 SV=2	HUMAN	30		E9PGZ1
28	49.89	49.89	52.03	45.01	40.18	sp|O43707|ACTN4_HUMAN	Alpha-actinin-4 OS=Homo sapiens GN=ACTN4 PE=1 SV=2	HUMAN	30		P16035
677	1.03	1.74	11.97	7.447	7.447	sp|P61163|ACTZ_HUMAN	Alpha-centractin OS=Homo sapiens GN=ACTR1A PE=1 SV=1	HUMAN	2		P21810
31	48.78	48.78	67.28	62.44	61.06	sp|P06733|ENOA_HUMAN	Alpha-enolase OS=Homo sapiens GN=ENO1 PE=1 SV=2	HUMAN	36		Q71U36
337	4.54	4.55	13.83	9.325	9.325	tr|J3KMX3|J3KMX3_HUMAN	Alpha-fetoprotein OS=Homo sapiens GN=AFP PE=1 SV=1	HUMAN	4		P10909
210	7.93	7.93	33.73	17.07	15.06	sp|Q15389|ANGP1_HUMAN	Angiopoietin-1 OS=Homo sapiens GN=ANGPT1 PE=1 SV=2	HUMAN	5		F8W6I7
56	31.08	31.08	67.05	54.05	51.73	sp|P04083|ANXA1_HUMAN	Annexin A1 OS=Homo sapiens GN=ANXA1 PE=1 SV=2	HUMAN	21		Q9NRN5
26	52.48	52.48	76.7	72.27	64.31	sp|P07355|ANXA2_HUMAN	Annexin A2 OS=Homo sapiens GN=ANXA2 PE=1 SV=2	HUMAN	42		P12814
142	12.33	12.33	48.12	34.06	24.38	sp|P08758|ANXA5_HUMAN	Annexin A5 OS=Homo sapiens GN=ANXA5 PE=1 SV=2	HUMAN	7		Q9Y490
244	6.78	6.78	20.51	8.915	7.727	sp|P08133|ANXA6_HUMAN	Annexin A6 OS=Homo sapiens GN=ANXA6 PE=1 SV=3	HUMAN	4		P02533
185	9.64	9.64	34.27	29.53	18.75	sp|P01008|ANT3_HUMAN	Antithrombin-III OS=Homo sapiens GN=SERPINC1 PE=1 SV=1	HUMAN	8		P02768
456	2.72	2.72	36.28	14.83	8.517	sp|P02649|APOE_HUMAN	Apolipoprotein E OS=Homo sapiens GN=APOE PE=1 SV=1	HUMAN	3		Q08380
479	2.42	2.42	34.38	28.13	13.54	sp|Q07812|BAX_HUMAN	Apoptosis regulator BAX OS=Homo sapiens GN=BAX PE=1 SV=1	HUMAN	2		P13797
379	3.92	3.92	8.877	4.167	4.167	tr|B0YIW6|B0YIW6_HUMAN	Archain 1, isoform CRA_a OS=Homo sapiens GN=ARCN1 PE=1 SV=1	HUMAN	2		Q92743
429	3.09	3.38	15.37	11.93	6.872	sp|P25705|ATPA_HUMAN	ATP synthase subunit alpha, mitochondrial OS=Homo sapiens GN=ATP5A1 PE=1 SV=1	HUMAN	2		Q32Q12
403	3.4	3.41	23.25	6.427	5.482	sp|P06576|ATPB_HUMAN	ATP synthase subunit beta, mitochondrial OS=Homo sapiens GN=ATP5B PE=1 SV=3	HUMAN	2		P10915
115	16.14	16.14	14.9	9.628	9.628	sp|P53396|ACLY_HUMAN	ATP-citrate synthase OS=Homo sapiens GN=ACLY PE=1 SV=3	HUMAN	9		P35555
602	1.74	1.74	18.96	9.479	9.479	sp|O95816|BAG2_HUMAN	BAG family molecular chaperone regulator 2 OS=Homo sapiens GN=BAG2 PE=1 SV=1	HUMAN	2		P68104
42	38.4	38.56	18.04	8.426	6.035	sp|P98160|PGBM_HUMAN	Basement membrane-specific heparan sulfate proteoglycan core protein OS=Homo sapiens GN=HSPG2 PE=1 SV=4	HUMAN	24		P07237
299	5.38	5.38	25.23	17.06	12.85	sp|Q02742|GCNT1_HUMAN	Beta-1,3-galactosyl-O-glycosyl-glycoprotein beta-1,6-N-acetylglucosaminyltransferase OS=Homo sapiens GN=GCNT1 PE=1 SV=2	HUMAN	3		F5GZN3
170	10.2	10.2	28.39	22.61	18.84	sp|P15291|B4GT1_HUMAN	Beta-1,4-galactosyltransferase 1 OS=Homo sapiens GN=B4GALT1 PE=1 SV=5	HUMAN	7		Q9Y6C2
422	3.18	3.18	31.23	11.96	9.302	tr|C9J3R8|C9J3R8_HUMAN	Beta-1,4-galactosyltransferase 4 OS=Homo sapiens GN=B4GALT4 PE=1 SV=1	HUMAN	2		P05155
435	3.01	3.01	21.31	21.31	16.39	tr|H0YL18|H0YL18_HUMAN	Beta-2-microglobulin OS=Homo sapiens GN=B2M PE=1 SV=1	HUMAN	2		P07585
68	25.88	25.88	41.58	40.22	39.95	sp|P21810|PGS1_HUMAN	Biglycan OS=Homo sapiens GN=BGN PE=1 SV=2	HUMAN	17		P17936
417	3.27	3.27	17.57	17.57	9.459	sp|P53004|BIEA_HUMAN	Biliverdin reductase A OS=Homo sapiens GN=BLVRA PE=1 SV=2	HUMAN	2		P13647
122	14.91	14.91	19.57	11.76	9.432	sp|P13497|BMP1_HUMAN	Bone morphogenetic protein 1 OS=Homo sapiens GN=BMP1 PE=1 SV=2	HUMAN	8		A0A0A0MT01
317	4.92	4.92	40.53	38.77	25.99	sp|P80723|BASP1_HUMAN	Brain acid soluble protein 1 OS=Homo sapiens GN=BASP1 PE=1 SV=2	HUMAN	3		Q15084
201	8.4	8.4	36	16.92	13.54	sp|Q96CX2|KCD12_HUMAN	BTB/POZ domain-containing protein KCTD12 OS=Homo sapiens GN=KCTD12 PE=1 SV=1	HUMAN	4		P28300
184	9.67	9.67	10.93	8.609	8.609	sp|P19022|CADH2_HUMAN	Cadherin-2 OS=Homo sapiens GN=CDH2 PE=1 SV=4	HUMAN	7		P60842
346	4.32	4.32	18.77	12.32	8.504	sp|Q9Y376|CAB39_HUMAN	Calcium-binding protein 39 OS=Homo sapiens GN=CAB39 PE=1 SV=1	HUMAN	3		O15144
342	4.41	4.44	28.51	19.3	19.3	sp|Q9HB71|CYBP_HUMAN	Calcyclin-binding protein OS=Homo sapiens GN=CACYBP PE=1 SV=2	HUMAN	3		P27658
66	26.88	26.91	48.13	39.18	27.43	tr|E9PGZ1|E9PGZ1_HUMAN	Caldesmon OS=Homo sapiens GN=CALD1 PE=1 SV=1	HUMAN	18		P07195
300	5.35	5.35	31.21	17.27	17.27	tr|B4DUT8|B4DUT8_HUMAN	Calponin OS=Homo sapiens GN=CNN2 PE=1 SV=1	HUMAN	5		P07737
780	0.47	1.77	36.78	22.49	13.07	sp|Q15417|CNN3_HUMAN	Calponin-3 OS=Homo sapiens GN=CNN3 PE=1 SV=1	HUMAN	3		Q16610
112	16.29	16.29	20.59	13.15	12.33	sp|O94985|CSTN1_HUMAN	Calsyntenin-1 OS=Homo sapiens GN=CLSTN1 PE=1 SV=1	HUMAN	9		P08238
433	3.04	3.04	25.71	10.48	8.254	sp|O43852|CALU_HUMAN	Calumenin OS=Homo sapiens GN=CALU PE=1 SV=2	HUMAN	2		Q02809
457	2.71	2.79	25.64	10.83	9.402	sp|P17612|KAPCA_HUMAN	cAMP-dependent protein kinase catalytic subunit alpha OS=Homo sapiens GN=PRKACA PE=1 SV=2	HUMAN	2		Q9Y4K0
294	5.48	5.48	49.5	27.91	19.27	tr|B1AK88|B1AK88_HUMAN	Capping protein (Actin filament) muscle Z-line, beta, isoform CRA_d OS=Homo sapiens GN=CAPZB PE=1 SV=1	HUMAN	4		P00558
366	4.01	4.01	19.95	5.851	5.851	sp|Q8NCH0|CHSTE_HUMAN	Carbohydrate sulfotransferase 14 OS=Homo sapiens GN=CHST14 PE=1 SV=2	HUMAN	2		P32119
146	11.96	11.96	58.12	51.99	48.01	sp|P16152|CBR1_HUMAN	Carbonyl reductase [NADPH] 1 OS=Homo sapiens GN=CBR1 PE=1 SV=3	HUMAN	9		I3L504
592	1.88	1.88	13.3	8.076	8.076	sp|Q9UI42|CBPA4_HUMAN	Carboxypeptidase A4 OS=Homo sapiens GN=CPA4 PE=1 SV=2	HUMAN	2		O75326
419	3.21	3.22	7.229	4.418	4.418	tr|X6R8A1|X6R8A1_HUMAN	Carboxypeptidase OS=Homo sapiens GN=CTSA PE=1 SV=1	HUMAN	2		O00469
932	0.13	3.57	14.23	3.729	2.348	tr|G3XAP6|G3XAP6_HUMAN	Cartilage oligomeric matrix protein OS=Homo sapiens GN=COMP PE=1 SV=1	HUMAN	2		P02462
343	4.41	4.41	22.35	12.57	8.38	tr|C9JP16|C9JP16_HUMAN	Cartilage-associated protein OS=Homo sapiens GN=CRTAP PE=1 SV=1	HUMAN	2		F5H2D0
301	5.34	5.35	27.14	18.88	10.03	sp|P07858|CATB_HUMAN	Cathepsin B OS=Homo sapiens GN=CTSB PE=1 SV=3	HUMAN	3		P23396
447	2.88	2.88	24.03	7.767	5.583	sp|P07339|CATD_HUMAN	Cathepsin D OS=Homo sapiens GN=CTSD PE=1 SV=1	HUMAN	2		D3YTG3
273	6.04	6.09	7.682	3.045	3.045	sp|Q6YHK3|CD109_HUMAN	CD109 antigen OS=Homo sapiens GN=CD109 PE=1 SV=2	HUMAN	3		O94985
425	3.15	3.15	27.75	19.9	15.71	sp|P60953|CDC42_HUMAN	Cell division control protein 42 homolog OS=Homo sapiens GN=CDC42 PE=1 SV=2	HUMAN	2		P04792
427	3.11	3.11	11.46	1.763	1.763	sp|Q8WUJ3|CEMIP_HUMAN	Cell migration-inducing and hyaluronan-binding protein OS=Homo sapiens GN=CEMIP PE=1 SV=2	HUMAN	2		P55072
290	5.58	5.58	51.4	15.78	14.5	sp|Q9BWS9|CHID1_HUMAN	Chitinase domain-containing protein 1 OS=Homo sapiens GN=CHID1 PE=1 SV=1	HUMAN	5		P53396
65	27.01	27.45	60.05	54.31	46.74	sp|P36222|CH3L1_HUMAN	Chitinase-3-like protein 1 OS=Homo sapiens GN=CHI3L1 PE=1 SV=2	HUMAN	30		Q14315
309	5.05	7.23	53.11	31.95	23.65	sp|O00299|CLIC1_HUMAN	Chloride intracellular channel protein 1 OS=Homo sapiens GN=CLIC1 PE=1 SV=4	HUMAN	5		P0C0L4
132	13.34	13.34	62.85	48.62	36.76	sp|Q9Y696|CLIC4_HUMAN	Chloride intracellular channel protein 4 OS=Homo sapiens GN=CLIC4 PE=1 SV=4	HUMAN	8		P22626
327	4.73	4.74	12.15	3.335	2.442	tr|A0A087WVQ6|A0A087WVQ6_HUMAN	Clathrin heavy chain OS=Homo sapiens GN=CLTC PE=1 SV=1	HUMAN	3		P01137
70	24.87	24.87	41.43	34.52	29.62	sp|P10909|CLUS_HUMAN	Clusterin OS=Homo sapiens GN=CLU PE=1 SV=1	HUMAN	18		Q08397
318	4.89	4.89	57.04	35.92	29.58	sp|Q14019|COTL1_HUMAN	Coactosin-like protein OS=Homo sapiens GN=COTL1 PE=1 SV=3	HUMAN	5		O43854
716	0.8	1.9	5.306	1.124	0.6745	sp|P12259|FA5_HUMAN	Coagulation factor V OS=Homo sapiens GN=F5 PE=1 SV=4	HUMAN	2		P13497
321	4.86	4.86	30.82	21.45	21.45	tr|M0QXB4|M0QXB4_HUMAN	Coatomer protein complex, subunit epsilon, isoform CRA_g OS=Homo sapiens GN=COPE PE=1 SV=1	HUMAN	3		P18669
135	13.11	13.11	58.82	53.43	37.25	tr|E9PK25|E9PK25_HUMAN	Cofilin-1 OS=Homo sapiens GN=CFL1 PE=1 SV=1	HUMAN	10		P22692
345	4.37	7.25	60.84	45.78	30.72	sp|Q9Y281|COF2_HUMAN	Cofilin-2 OS=Homo sapiens GN=CFL2 PE=1 SV=1	HUMAN	5		P14625
50	33.98	33.98	35.47	24.95	23.89	sp|Q76M96|CCD80_HUMAN	Coiled-coil domain-containing protein 80 OS=Homo sapiens GN=CCDC80 PE=1 SV=1	HUMAN	19		Q12805
5	205.13	207.42	89.96	88.32	85.25	sp|P02452|CO1A1_HUMAN	Collagen alpha-1(I) chain OS=Homo sapiens GN=COL1A1 PE=1 SV=5	HUMAN	556		E7EX29
7	100.35	102.35	74.9	52.46	48.29	sp|P02461|CO3A1_HUMAN	Collagen alpha-1(III) chain OS=Homo sapiens GN=COL3A1 PE=1 SV=4	HUMAN	127		D3DQH8
108	16.94	17.06	33.19	13.18	9.946	sp|P02462|CO4A1_HUMAN	Collagen alpha-1(IV) chain OS=Homo sapiens GN=COL4A1 PE=1 SV=3	HUMAN	11		P50395
416	3.27	57.46	41.68	26.44	24.16	tr|A0A087WXW9|A0A087WXW9_HUMAN	Collagen alpha-1(V) chain OS=Homo sapiens GN=COL5A1 PE=1 SV=1	HUMAN	51		P67936
22	59.19	59.22	41.57	26.77	24.54	sp|P20908|CO5A1_HUMAN	Collagen alpha-1(V) chain OS=Homo sapiens GN=COL5A1 PE=1 SV=3	HUMAN	52		P41250
14	76.12	76.12	69.01	50.78	44.54	tr|A0A087X0S5|A0A087X0S5_HUMAN	Collagen alpha-1(VI) chain OS=Homo sapiens GN=COL6A1 PE=1 SV=1	HUMAN	55		Q9Y696
522	2.03	2.47	23.27	2.208	0.9851	sp|Q02388|CO7A1_HUMAN	Collagen alpha-1(VII) chain OS=Homo sapiens GN=COL7A1 PE=1 SV=2	HUMAN	2		P62937
96	18.13	20.31	45.16	33.74	20.83	sp|P27658|CO8A1_HUMAN	Collagen alpha-1(VIII) chain OS=Homo sapiens GN=COL8A1 PE=1 SV=2	HUMAN	13		P30041
1037	0.06	4.29	14.95	4.485	1.661	sp|P12107|COBA1_HUMAN	Collagen alpha-1(XI) chain OS=Homo sapiens GN=COL11A1 PE=1 SV=4	HUMAN	4		E9PK25
2	273.05	273.05	66.14	61.18	57.36	sp|Q99715|COCA1_HUMAN	Collagen alpha-1(XII) chain OS=Homo sapiens GN=COL12A1 PE=1 SV=2	HUMAN	166		P37802
3	239.63	239.74	96.49	89.24	88.8	sp|P08123|CO1A2_HUMAN	Collagen alpha-2(I) chain OS=Homo sapiens GN=COL1A2 PE=1 SV=7	HUMAN	527		Q99497
25	52.66	54.62	43.4	30.61	28.21	sp|P08572|CO4A2_HUMAN	Collagen alpha-2(IV) chain OS=Homo sapiens GN=COL4A2 PE=1 SV=4	HUMAN	37		A0A087WSY9
35	47.19	50.55	61.11	29.55	27.02	sp|P05997|CO5A2_HUMAN	Collagen alpha-2(V) chain OS=Homo sapiens GN=COL5A2 PE=1 SV=3	HUMAN	38		Q16658
27	50.81	50.81	50.34	29.83	29.83	sp|P12110|CO6A2_HUMAN	Collagen alpha-2(VI) chain OS=Homo sapiens GN=COL6A2 PE=1 SV=4	HUMAN	42		P26022
4	223.55	223.55	61.54	52.91	46.4	sp|P12111|CO6A3_HUMAN	Collagen alpha-3(VI) chain OS=Homo sapiens GN=COL6A3 PE=1 SV=5	HUMAN	146		P01024
289	5.6	5.6	27.98	23.87	18.93	sp|Q96CG8|CTHR1_HUMAN	Collagen triple helix repeat-containing protein 1 OS=Homo sapiens GN=CTHRC1 PE=1 SV=1	HUMAN	8		P08758
316	4.93	4.93	24.12	10.24	5.256	sp|Q5KU26|COL12_HUMAN	Collectin-12 OS=Homo sapiens GN=COLEC12 PE=1 SV=3	HUMAN	4		P23142
469	2.53	2.53	33.33	15.23	11.52	sp|Q9BXJ0|C1QT5_HUMAN	Complement C1q tumor necrosis factor-related protein 5 OS=Homo sapiens GN=C1QTNF5 PE=1 SV=1	HUMAN	2		P14543
109	16.73	16.73	31.3	23.55	23.55	tr|F5H2D0|F5H2D0_HUMAN	Complement C1r subcomponent OS=Homo sapiens GN=C1R PE=1 SV=3	HUMAN	12		P55268
156	11.06	11.06	24.71	17.3	14.24	sp|P09871|C1S_HUMAN	Complement C1s subcomponent OS=Homo sapiens GN=C1S PE=1 SV=1	HUMAN	8		P16152
141	12.36	12.36	14.61	7.216	5.713	sp|P01024|CO3_HUMAN	Complement C3 OS=Homo sapiens GN=C3 PE=1 SV=2	HUMAN	11		P20618
117	15.75	15.75	16.4	9.92	7.397	sp|P0C0L4|CO4A_HUMAN	Complement C4-A OS=Homo sapiens GN=C4A PE=1 SV=2	HUMAN	10		Q15149
786	0.44	0.8	20.38	5	5	tr|K7ERG9|K7ERG9_HUMAN	Complement factor D OS=Homo sapiens GN=CFD PE=1 SV=1	HUMAN	2		P01210
153	11.23	11.23	25.75	7.149	7.149	sp|P08603|CFAH_HUMAN	Complement factor H OS=Homo sapiens GN=CFH PE=1 SV=4	HUMAN	8		Q5T7F0
305	5.13	5.13	32.81	11.11	6.076	tr|G3XAM2|G3XAM2_HUMAN	Complement factor I OS=Homo sapiens GN=CFI PE=1 SV=1	HUMAN	2		P25787
601	1.75	1.75	18.34	10.03	7.45	sp|P29279|CTGF_HUMAN	Connective tissue growth factor OS=Homo sapiens GN=CTGF PE=1 SV=2	HUMAN	2		O76061
762	0.57	0.57	9.944	5.441	3.752	tr|F2Z2V0|F2Z2V0_HUMAN	Copine-1 (Fragment) OS=Homo sapiens GN=CPNE1 PE=1 SV=1	HUMAN	2		P08603
211	7.92	7.92	37.94	20.33	20.33	tr|B4E3S0|B4E3S0_HUMAN	Coronin OS=Homo sapiens GN=CORO1C PE=1 SV=1	HUMAN	4		P62269
189	9.46	9.46	41.8	30.34	25.08	tr|A0A0A6YY95|A0A0A6YY95_HUMAN	C-type lectin domain family 11 member A OS=Homo sapiens GN=CLEC11A PE=1 SV=1	HUMAN	7		P26641
209	8	8	31.51	19.18	19.18	sp|P01034|CYTC_HUMAN	Cystatin-C OS=Homo sapiens GN=CST3 PE=1 SV=1	HUMAN	5		P09871
212	7.92	7.92	62.5	50.63	31.25	tr|E9PP21|E9PP21_HUMAN	Cysteine and glycine-rich protein 1 OS=Homo sapiens GN=CSRP1 PE=1 SV=1	HUMAN	6		J3QQX2
392	3.58	3.58	48.56	27.88	24.52	sp|P52943|CRIP2_HUMAN	Cysteine-rich protein 2 OS=Homo sapiens GN=CRIP2 PE=1 SV=1	HUMAN	2		P05388
238	6.98	7.85	46.53	45.54	38.61	tr|C9JFR7|C9JFR7_HUMAN	Cytochrome c (Fragment) OS=Homo sapiens GN=CYCS PE=1 SV=1	HUMAN	5		P02538
461	2.64	2.65	14.45	4.153	4.153	sp|Q07065|CKAP4_HUMAN	Cytoskeleton-associated protein 4 OS=Homo sapiens GN=CKAP4 PE=1 SV=2	HUMAN	2		Q9BRK5
315	4.95	4.95	24.42	8.421	8.421	sp|Q96KP4|CNDP2_HUMAN	Cytosolic non-specific dipeptidase OS=Homo sapiens GN=CNDP2 PE=1 SV=2	HUMAN	3		G3V3M6
88	20.02	20.02	43.18	35.93	34.26	sp|P07585|PGS2_HUMAN	Decorin OS=Homo sapiens GN=DCN PE=1 SV=1	HUMAN	12		P40925
395	3.5	3.5	22.73	22.73	12.73	sp|P81605|DCD_HUMAN	Dermcidin OS=Homo sapiens GN=DCD PE=1 SV=2	HUMAN	2		P40926
454	2.8	2.8	55.76	24.24	17.58	sp|P60981|DEST_HUMAN	Destrin OS=Homo sapiens GN=DSTN PE=1 SV=3	HUMAN	3		F8WCF6
362	4.03	4.03	36.47	21.8	21.8	sp|O94907|DKK1_HUMAN	Dickkopf-related protein 1 OS=Homo sapiens GN=DKK1 PE=1 SV=1	HUMAN	4		P04222
351	4.24	4.65	29.37	15.03	11.01	sp|Q16555|DPYL2_HUMAN	Dihydropyrimidinase-related protein 2 OS=Homo sapiens GN=DPYSL2 PE=1 SV=1	HUMAN	4		P35579
271	6.08	6.08	28.6	12.98	7.895	sp|Q14195|DPYL3_HUMAN	Dihydropyrimidinase-related protein 3 OS=Homo sapiens GN=DPYSL3 PE=1 SV=1	HUMAN	4		G3V4W0
414	3.3	3.3	17.27	4.62	4.62	sp|O43184|ADA12_HUMAN	Disintegrin and metalloproteinase domain-containing protein 12 OS=Homo sapiens GN=ADAM12 PE=1 SV=3	HUMAN	3		P28074
406	3.36	3.36	10.2	3.013	2.317	sp|Q13444|ADA15_HUMAN	Disintegrin and metalloproteinase domain-containing protein 15 OS=Homo sapiens GN=ADAM15 PE=1 SV=4	HUMAN	2		G3V5Z7
489	2.29	3.32	10.75	1.138	0.4404	tr|A0A087WXL3|A0A087WXL3_HUMAN	DNA polymerase theta OS=Homo sapiens GN=POLQ PE=1 SV=1	HUMAN	2		P15291
161	10.89	10.89	39.54	34.22	34.22	tr|G3V3M6|G3V3M6_HUMAN	DNA-(apurinic or apyrimidinic site) lyase (Fragment) OS=Homo sapiens GN=APEX1 PE=1 SV=1	HUMAN	7		P10809
581	1.96	1.96	24.86	15.92	7.821	sp|Q9UBS4|DJB11_HUMAN	DnaJ homolog subfamily B member 11 OS=Homo sapiens GN=DNAJB11 PE=1 SV=1	HUMAN	2		P01033
391	3.6	3.6	22.01	14.83	14.83	sp|Q8TEA8|DTD1_HUMAN	D-tyrosyl-tRNA(Tyr) deacylase 1 OS=Homo sapiens GN=DTD1 PE=1 SV=2	HUMAN	2		Q14766
678	1.02	1.03	16.96	4.239	4.239	sp|Q13561|DCTN2_HUMAN	Dynactin subunit 2 OS=Homo sapiens GN=DCTN2 PE=1 SV=4	HUMAN	2		Q12841
653	1.24	1.24	23.86	18.18	11.36	tr|X6RLR1|X6RLR1_HUMAN	Dynactin subunit 3 OS=Homo sapiens GN=DCTN3 PE=1 SV=1	HUMAN	2		Q5T9B7
511	2.06	2.06	32.5	7.917	7.917	sp|Q96C19|EFHD2_HUMAN	EF-hand domain-containing protein D2 OS=Homo sapiens GN=EFHD2 PE=1 SV=1	HUMAN	2		P63244
126	14.44	14.44	26.57	23.33	18.66	sp|Q12805|FBLN3_HUMAN	EGF-containing fibulin-like extracellular matrix protein 1 OS=Homo sapiens GN=EFEMP1 PE=1 SV=2	HUMAN	15		P30085
492	2.27	2.27	11.7	7.569	7.569	tr|E9PRU1|E9PRU1_HUMAN	EGF-containing fibulin-like extracellular matrix protein 2 OS=Homo sapiens GN=EFEMP2 PE=1 SV=1	HUMAN	2		B7Z6Z4
121	15	15.01	39.79	35.83	19.58	sp|O43854|EDIL3_HUMAN	EGF-like repeat and discoidin I-like domain-containing protein 3 OS=Homo sapiens GN=EDIL3 PE=1 SV=1	HUMAN	8		P09382
83	21.06	21.06	51.95	35.06	30.52	sp|P68104|EF1A1_HUMAN	Elongation factor 1-alpha 1 OS=Homo sapiens GN=EEF1A1 PE=1 SV=1	HUMAN	15		P25786
545	2	2.51	21.33	9.333	9.333	sp|P24534|EF1B_HUMAN	Elongation factor 1-beta OS=Homo sapiens GN=EEF1B2 PE=1 SV=3	HUMAN	2		P62805
339	4.5	5.19	25.68	10.47	7.317	tr|E9PRY8|E9PRY8_HUMAN	Elongation factor 1-delta OS=Homo sapiens GN=EEF1D PE=1 SV=1	HUMAN	4		P61158
155	11.13	11.13	31.58	23.57	13.04	sp|P26641|EF1G_HUMAN	Elongation factor 1-gamma OS=Homo sapiens GN=EEF1G PE=1 SV=3	HUMAN	6		P61978
58	30.41	30.41	45.22	32.87	26.57	sp|P13639|EF2_HUMAN	Elongation factor 2 OS=Homo sapiens GN=EEF2 PE=1 SV=4	HUMAN	15		P19022
86	20.85	20.85	28.25	17.13	13.48	sp|Q9Y6C2|EMIL1_HUMAN	EMILIN-1 OS=Homo sapiens GN=EMILIN1 PE=1 SV=2	HUMAN	10		P01008
310	5.05	5.05	40.61	18.01	14.18	sp|P30040|ERP29_HUMAN	Endoplasmic reticulum resident protein 29 OS=Homo sapiens GN=ERP29 PE=1 SV=4	HUMAN	3		O14498
125	14.44	15.55	26.9	20.42	14.82	sp|P14625|ENPL_HUMAN	Endoplasmin OS=Homo sapiens GN=HSP90B1 PE=1 SV=1	HUMAN	8		P31949
386	3.76	3.76	32.43	25	18.24	sp|O60869|EDF1_HUMAN	Endothelial differentiation-related factor 1 OS=Homo sapiens GN=EDF1 PE=1 SV=1	HUMAN	2		Q6EMK4
350	4.27	16.36	68.1	54.74	26.72	tr|Q5HYB6|Q5HYB6_HUMAN	Epididymis luminal protein 189 OS=Homo sapiens GN=DKFZp686J1372 PE=1 SV=1	HUMAN	8		A0A0A6YY95
295	5.45	6.05	25.48	20.95	18.33	tr|V9HW75|V9HW75_HUMAN	Epididymis secretory protein Li 109 OS=Homo sapiens GN=HEL-S-109 PE=1 SV=1	HUMAN	6		P01023
94	18.19	18.19	43.1	32.76	30.54	sp|P60842|IF4A1_HUMAN	Eukaryotic initiation factor 4A-I OS=Homo sapiens GN=EIF4A1 PE=1 SV=1	HUMAN	11		P09211
431	3.08	3.08	22.22	8.571	6.032	sp|P05198|IF2A_HUMAN	Eukaryotic translation initiation factor 2 subunit 1 OS=Homo sapiens GN=EIF2S1 PE=1 SV=3	HUMAN	2		Q96HC4
421	3.19	3.19	12.89	7.843	7.843	sp|O00303|EIF3F_HUMAN	Eukaryotic translation initiation factor 3 subunit F OS=Homo sapiens GN=EIF3F PE=1 SV=1	HUMAN	2		A0A087WZH7
452	2.82	2.82	12.3	6.417	6.417	sp|Q7L2H7|EIF3M_HUMAN	Eukaryotic translation initiation factor 3 subunit M OS=Homo sapiens GN=EIF3M PE=1 SV=1	HUMAN	2		P23381
277	5.96	5.96	36.69	27.42	18.55	sp|Q15056|IF4H_HUMAN	Eukaryotic translation initiation factor 4H OS=Homo sapiens GN=EIF4H PE=1 SV=5	HUMAN	4		P50990
105	17.34	17.34	66.67	43.01	43.01	tr|I3L504|I3L504_HUMAN	Eukaryotic translation initiation factor 5A-1 OS=Homo sapiens GN=EIF5A PE=1 SV=1	HUMAN	10		A0A087WZ27
292	5.51	5.51	22.92	6.568	4.424	sp|Q16394|EXT1_HUMAN	Exostosin-1 OS=Homo sapiens GN=EXT1 PE=1 SV=2	HUMAN	3		Q13404
231	7.18	7.18	20.19	11.14	8.635	sp|Q93063|EXT2_HUMAN	Exostosin-2 OS=Homo sapiens GN=EXT2 PE=1 SV=1	HUMAN	4		Q15691
99	17.9	17.91	37.41	27.78	26.67	sp|Q16610|ECM1_HUMAN	Extracellular matrix protein 1 OS=Homo sapiens GN=ECM1 PE=1 SV=2	HUMAN	11		Q8IUX7
291	5.55	5.55	20.72	10.96	9.589	sp|Q8IXL6|DMP4_HUMAN	Extracellular serine/threonine protein kinase FAM20C OS=Homo sapiens GN=FAM20C PE=1 SV=2	HUMAN	4		E5RJD8
220	7.64	22.25	45.05	26.45	19.11	tr|E7EQR4|E7EQR4_HUMAN	Ezrin OS=Homo sapiens GN=EZR PE=1 SV=3	HUMAN	13		Q96CX2
251	6.5	6.5	56.64	35.31	20.28	sp|P52907|CAZA1_HUMAN	F-actin-capping protein subunit alpha-1 OS=Homo sapiens GN=CAPZA1 PE=1 SV=3	HUMAN	4		P61160
328	4.72	6.07	46.15	32.52	21.33	sp|P47755|CAZA2_HUMAN	F-actin-capping protein subunit alpha-2 OS=Homo sapiens GN=CAPZA2 PE=1 SV=3	HUMAN	4		P40227
139	12.93	12.93	39.15	24.75	18.05	sp|Q16658|FSCN1_HUMAN	Fascin OS=Homo sapiens GN=FSCN1 PE=1 SV=3	HUMAN	7		Q86Y38
474	2.45	2.45	9.359	2.27	1.513	sp|P49327|FAS_HUMAN	Fatty acid synthase OS=Homo sapiens GN=FASN PE=1 SV=3	HUMAN	3		P06748
329	4.71	4.71	31.85	20	20	sp|Q01469|FABP5_HUMAN	Fatty acid-binding protein, epidermal OS=Homo sapiens GN=FABP5 PE=1 SV=3	HUMAN	3		P30044
380	3.91	3.91	15.16	11.25	8.281	tr|H0YJ34|H0YJ34_HUMAN	Fermitin family homolog 2 (Fragment) OS=Homo sapiens GN=FERMT2 PE=1 SV=1	HUMAN	4		Q4ZHG4
82	21.24	21.24	19.05	7.245	5.399	sp|P35555|FBN1_HUMAN	Fibrillin-1 OS=Homo sapiens GN=FBN1 PE=1 SV=3	HUMAN	19		P08107
671	1.07	1.07	26.8	15.98	10.82	sp|P21781|FGF7_HUMAN	Fibroblast growth factor 7 OS=Homo sapiens GN=FGF7 PE=1 SV=1	HUMAN	2		P01034
275	6	177.29	83.41	83.14	79.78	tr|H0Y7Z1|H0Y7Z1_HUMAN	Fibronectin (Fragment) OS=Homo sapiens GN=FN1 PE=1 SV=1	HUMAN	293		Q15389
1	328.31	328.31	80.43	76.7	74.85	sp|P02751|FINC_HUMAN	Fibronectin OS=Homo sapiens GN=FN1 PE=1 SV=4	HUMAN	514		B4E3S0
207	8.04	8.04	16.1	5.016	4.382	sp|Q4ZHG4|FNDC1_HUMAN	Fibronectin type III domain-containing protein 1 OS=Homo sapiens GN=FNDC1 PE=1 SV=4	HUMAN	4		E9PP21
143	12.28	12.28	17.07	12.52	9.673	sp|P23142|FBLN1_HUMAN	Fibulin-1 OS=Homo sapiens GN=FBLN1 PE=1 SV=4	HUMAN	9		Q99584
6	118.15	118.15	44.2	37.29	34.79	sp|P21333|FLNA_HUMAN	Filamin-A OS=Homo sapiens GN=FLNA PE=1 SV=4	HUMAN	64		Q04917
48	35.11	42.16	30.67	15.56	12.22	sp|O75369|FLNB_HUMAN	Filamin-B OS=Homo sapiens GN=FLNB PE=1 SV=2	HUMAN	22		P16949
116	16.06	21.64	17.32	6.972	4.881	sp|Q14315|FLNC_HUMAN	Filamin-C OS=Homo sapiens GN=FLNC PE=1 SV=3	HUMAN	11		O95084
340	4.47	4.47	43.69	29.61	29.61	sp|P30043|BLVRB_HUMAN	Flavin reductase (NADPH) OS=Homo sapiens GN=BLVRB PE=1 SV=3	HUMAN	4		O15511
174	10.04	10.04	48.38	25.97	19.48	sp|Q12841|FSTL1_HUMAN	Follistatin-related protein 1 OS=Homo sapiens GN=FSTL1 PE=1 SV=1	HUMAN	9		P52209
521	2.03	8.1	33.79	15.38	15.38	sp|P09972|ALDOC_HUMAN	Fructose-bisphosphate aldolase C OS=Homo sapiens GN=ALDOC PE=1 SV=2	HUMAN	6		O75083
34	47.39	47.39	73.91	63.59	60.6	tr|J3KPS3|J3KPS3_HUMAN	Fructose-bisphosphate aldolase OS=Homo sapiens GN=ALDOA PE=1 SV=1	HUMAN	33		E7EQR4
179	9.87	9.87	61.48	61.48	58.52	sp|P09382|LEG1_HUMAN	Galectin-1 OS=Homo sapiens GN=LGALS1 PE=1 SV=2	HUMAN	13		P28072
400	3.43	3.43	18.4	13.2	10.4	sp|P17931|LEG3_HUMAN	Galectin-3 OS=Homo sapiens GN=LGALS3 PE=1 SV=5	HUMAN	2		J3QRS3
77	23.29	23.29	40.34	31.11	24.79	sp|Q08380|LG3BP_HUMAN	Galectin-3-binding protein OS=Homo sapiens GN=LGALS3BP PE=1 SV=1	HUMAN	12		P30487
91	19.02	19.02	32.86	21.38	19.69	tr|A0A0A0MT01|A0A0A0MT01_HUMAN	Gelsolin OS=Homo sapiens GN=GSN PE=1 SV=1	HUMAN	10		P30086
30	49.22	49.22	71.86	68.59	64.32	sp|P07093|GDN_HUMAN	Glia-derived nexin OS=Homo sapiens GN=SERPINE2 PE=1 SV=1	HUMAN	37		Q96D15
383	3.84	3.84	21.36	11.07	6.019	sp|P11413|G6PD_HUMAN	Glucose-6-phosphate 1-dehydrogenase OS=Homo sapiens GN=G6PD PE=1 SV=4	HUMAN	2		P05387
695	0.91	0.91	22.64	17.92	17.92	sp|P35754|GLRX1_HUMAN	Glutaredoxin-1 OS=Homo sapiens GN=GLRX PE=1 SV=2	HUMAN	2		Q14847
420	3.2	3.21	24.48	18.51	11.04	sp|O76003|GLRX3_HUMAN	Glutaredoxin-3 OS=Homo sapiens GN=GLRX3 PE=1 SV=2	HUMAN	2		P69905
365	4.01	4.01	33.2	12.45	9.959	sp|P78417|GSTO1_HUMAN	Glutathione S-transferase omega-1 OS=Homo sapiens GN=GSTO1 PE=1 SV=2	HUMAN	2		Q96FQ6
191	9.32	9.32	52.38	52.38	39.52	sp|P09211|GSTP1_HUMAN	Glutathione S-transferase P OS=Homo sapiens GN=GSTP1 PE=1 SV=2	HUMAN	7		Q15404
64	27.65	27.65	73.73	66.57	57.31	sp|P04406|G3P_HUMAN	Glyceraldehyde-3-phosphate dehydrogenase OS=Homo sapiens GN=GAPDH PE=1 SV=3	HUMAN	24		Q93063
131	13.59	13.59	25.98	16.37	15.43	sp|P41250|SYG_HUMAN	Glycine--tRNA ligase OS=Homo sapiens GN=GARS PE=1 SV=3	HUMAN	7		Q15365
347	4.31	4.31	16.92	9.847	5.27	sp|Q14393|GAS6_HUMAN	Growth arrest-specific protein 6 OS=Homo sapiens GN=GAS6 PE=1 SV=2	HUMAN	2		Q00888
377	3.94	3.94	25.75	20.17	15.45	tr|B5MDF5|B5MDF5_HUMAN	GTP-binding nuclear protein Ran OS=Homo sapiens GN=RAN PE=1 SV=1	HUMAN	3		P37837
302	5.31	5.31	27.32	12.96	9.577	sp|P04899|GNAI2_HUMAN	Guanine nucleotide-binding protein G(i) subunit alpha-2 OS=Homo sapiens GN=GNAI2 PE=1 SV=3	HUMAN	3		O15145
428	3.1	3.1	47.22	31.94	31.94	sp|Q9UBI6|GBG12_HUMAN	Guanine nucleotide-binding protein G(I)/G(S)/G(O) subunit gamma-12 OS=Homo sapiens GN=GNG12 PE=1 SV=3	HUMAN	2		P39019
176	9.98	9.98	50.47	33.12	26.81	sp|P63244|GBLP_HUMAN	Guanine nucleotide-binding protein subunit beta-2-like 1 OS=Homo sapiens GN=GNB2L1 PE=1 SV=3	HUMAN	7		U3KQK0
262	6.24	6.27	37.01	31.82	22.73	tr|A0A0B4J2G9|A0A0B4J2G9_HUMAN	HCG1789329, isoform CRA_a OS=Homo sapiens GN=hCG_1789329 PE=4 SV=1	HUMAN	4		C9JFR7
208	8.03	16.74	34.01	26.68	18.25	sp|P08107|HSP71_HUMAN	Heat shock 70 kDa protein 1A/1B OS=Homo sapiens GN=HSPA1A PE=1 SV=5	HUMAN	12		P24592
24	53.1	53.1	60.53	49.23	47.21	sp|P11142|HSP7C_HUMAN	Heat shock cognate 71 kDa protein OS=Homo sapiens GN=HSPA8 PE=1 SV=1	HUMAN	41		P55145
113	16.28	16.28	62.44	46.83	43.41	sp|P04792|HSPB1_HUMAN	Heat shock protein beta-1 OS=Homo sapiens GN=HSPB1 PE=1 SV=2	HUMAN	9		Q15907
296	5.44	12.82	19.26	13.39	11.89	sp|P07900|HS90A_HUMAN	Heat shock protein HSP 90-alpha OS=Homo sapiens GN=HSP90AA1 PE=1 SV=5	HUMAN	8		Q86UD1
100	17.78	17.78	25.69	18.23	16.16	sp|P08238|HS90B_HUMAN	Heat shock protein HSP 90-beta OS=Homo sapiens GN=HSP90AB1 PE=1 SV=4	HUMAN	11		P09493
303	5.14	5.14	9.193	1.455	0.7808	sp|Q96RW7|HMCN1_HUMAN	Hemicentin-1 OS=Homo sapiens GN=HMCN1 PE=1 SV=2	HUMAN	3		P08133
228	7.4	7.4	46.48	34.51	23.24	sp|P69905|HBA_HUMAN	Hemoglobin subunit alpha OS=Homo sapiens GN=HBA1 PE=1 SV=2	HUMAN	7		Q06323
261	6.27	6.27	40.82	21.77	15.65	sp|P68871|HBB_HUMAN	Hemoglobin subunit beta OS=Homo sapiens GN=HBB PE=1 SV=2	HUMAN	8		Q93077
627	1.55	2.07	12.84	4.23	2.568	tr|D6RAR4|D6RAR4_HUMAN	Hepatocyte growth factor activator OS=Homo sapiens GN=HGFAC PE=1 SV=1	HUMAN	2		P61812
297	5.44	5.44	45	12.5	12.5	tr|D6R9P3|D6R9P3_HUMAN	Heterogeneous nuclear ribonucleoprotein A/B OS=Homo sapiens GN=HNRNPAB PE=1 SV=1	HUMAN	3		P12081
71	24.52	24.52	62.21	53.09	48.86	tr|F8W6I7|F8W6I7_HUMAN	Heterogeneous nuclear ribonucleoprotein A1 OS=Homo sapiens GN=HNRNPA1 PE=1 SV=2	HUMAN	15		P08865
455	2.74	2.74	40.48	20.48	10.48	tr|H0YA96|H0YA96_HUMAN	Heterogeneous nuclear ribonucleoprotein D0 (Fragment) OS=Homo sapiens GN=HNRNPD PE=1 SV=1	HUMAN	2		Q96CN7
183	9.67	9.67	40.39	17.71	15.33	sp|P61978|HNRPK_HUMAN	Heterogeneous nuclear ribonucleoprotein K OS=Homo sapiens GN=HNRNPK PE=1 SV=1	HUMAN	5		P52907
494	2.25	2.26	20.39	5.939	4.655	sp|O60506|HNRPQ_HUMAN	Heterogeneous nuclear ribonucleoprotein Q OS=Homo sapiens GN=SYNCRIP PE=1 SV=2	HUMAN	2		P62263
118	15.66	23.37	52.41	43.63	41.64	sp|P22626|ROA2_HUMAN	Heterogeneous nuclear ribonucleoproteins A2/B1 OS=Homo sapiens GN=HNRNPA2B1 PE=1 SV=2	HUMAN	14		P50281
167	10.51	10.51	54.96	26.34	22.9	tr|G3V4W0|G3V4W0_HUMAN	Heterogeneous nuclear ribonucleoproteins C1/C2 (Fragment) OS=Homo sapiens GN=HNRNPC PE=1 SV=1	HUMAN	6		Q00688
248	6.67	7.01	34.18	21.81	13.75	sp|P12081|SYHC_HUMAN	Histidine--tRNA ligase, cytoplasmic OS=Homo sapiens GN=HARS PE=1 SV=2	HUMAN	3		Q8WVC2
246	6.72	6.72	35.38	35.38	35.38	sp|Q93077|H2A1C_HUMAN	Histone H2A type 1-C OS=Homo sapiens GN=HIST1H2AC PE=1 SV=3	HUMAN	5		P17987
801	0.37	6.6	41.86	35.66	35.66	sp|Q9BTM1|H2AJ_HUMAN	Histone H2A.J OS=Homo sapiens GN=H2AFJ PE=1 SV=1	HUMAN	5		P11940
237	7.01	7.01	31.33	27.11	27.11	tr|U3KQK0|U3KQK0_HUMAN	Histone H2B OS=Homo sapiens GN=HIST1H2BN PE=1 SV=1	HUMAN	4		P30050
758	0.59	6.65	41.27	35.71	35.71	sp|Q16778|H2B2E_HUMAN	Histone H2B type 2-E OS=Homo sapiens GN=HIST2H2BE PE=1 SV=3	HUMAN	4		P25788
181	9.73	9.73	62.14	52.43	52.43	sp|P62805|H4_HUMAN	Histone H4 OS=Homo sapiens GN=HIST1H4A PE=1 SV=2	HUMAN	9		P68133
459	2.69	7.6	30.68	24.93	21.37	sp|P10316|1A69_HUMAN	HLA class I histocompatibility antigen, A-69 alpha chain OS=Homo sapiens GN=HLA-A PE=1 SV=2	HUMAN	7		P68871
223	7.49	9.15	30.66	18.51	18.51	sp|P30487|1B49_HUMAN	HLA class I histocompatibility antigen, B-49 alpha chain OS=Homo sapiens GN=HLA-B PE=1 SV=2	HUMAN	6		A0A0B4J2G9
369	4	7.4	24.59	21.55	16.02	sp|P01889|1B07_HUMAN	HLA class I histocompatibility antigen, B-7 alpha chain OS=Homo sapiens GN=HLA-B PE=1 SV=3	HUMAN	5		Q53FA7
165	10.68	10.68	25.41	23.77	23.77	sp|P04222|1C03_HUMAN	HLA class I histocompatibility antigen, Cw-3 alpha chain OS=Homo sapiens GN=HLA-C PE=1 SV=2	HUMAN	7		Q9Y5S9
888	0.18	6.45	32.79	22.4	16.94	sp|Q29963|1C06_HUMAN	HLA class I histocompatibility antigen, Cw-6 alpha chain OS=Homo sapiens GN=HLA-C PE=1 SV=2	HUMAN	5		P78371
81	21.49	21.49	50.85	43.5	33.33	sp|P10915|HPLN1_HUMAN	Hyaluronan and proteoglycan link protein 1 OS=Homo sapiens GN=HAPLN1 PE=2 SV=2	HUMAN	12		P28066
389	3.67	5.72	29.62	16.59	14.45	tr|H3BTH8|H3BTH8_HUMAN	Hyaluronan and proteoglycan link protein 3 OS=Homo sapiens GN=HAPLN3 PE=1 SV=1	HUMAN	5		P28070
186	9.59	9.59	14.95	14.95	14.95	sp|O14498|ISLR_HUMAN	Immunoglobulin superfamily containing leucine-rich repeat protein OS=Homo sapiens GN=ISLR PE=1 SV=1	HUMAN	7		P18085
354	4.13	4.13	5.708	2.854	2.854	sp|Q14974|IMB1_HUMAN	Importin subunit beta-1 OS=Homo sapiens GN=KPNB1 PE=1 SV=2	HUMAN	2		Q92928
371	4	4	8.113	4.102	4.102	sp|O00410|IPO5_HUMAN	Importin-5 OS=Homo sapiens GN=IPO5 PE=1 SV=4	HUMAN	2		Q09666
54	31.9	31.9	56.1	47.65	45.54	sp|P08476|INHBA_HUMAN	Inhibin beta A chain OS=Homo sapiens GN=INHBA PE=1 SV=2	HUMAN	26		Q14195
89	19.35	19.35	69.42	44.67	44.67	sp|P17936|IBP3_HUMAN	Insulin-like growth factor-binding protein 3 OS=Homo sapiens GN=IGFBP3 PE=1 SV=2	HUMAN	26		P31946
124	14.52	14.52	43.41	38.37	33.72	sp|P22692|IBP4_HUMAN	Insulin-like growth factor-binding protein 4 OS=Homo sapiens GN=IGFBP4 PE=1 SV=2	HUMAN	24		Q6YHK3
293	5.49	5.49	32.35	15.07	12.13	sp|P24593|IBP5_HUMAN	Insulin-like growth factor-binding protein 5 OS=Homo sapiens GN=IGFBP5 PE=1 SV=1	HUMAN	4		P49721
239	6.94	6.94	30.42	30.42	30.42	sp|P24592|IBP6_HUMAN	Insulin-like growth factor-binding protein 6 OS=Homo sapiens GN=IGFBP6 PE=1 SV=1	HUMAN	10		H0Y7Z1
57	30.78	30.78	57.09	53.9	53.9	sp|Q16270|IBP7_HUMAN	Insulin-like growth factor-binding protein 7 OS=Homo sapiens GN=IGFBP7 PE=1 SV=1	HUMAN	51		P38159
286	5.64	5.64	22.78	8.021	4.064	tr|Q5T985|Q5T985_HUMAN	Inter-alpha-trypsin inhibitor heavy chain H2 OS=Homo sapiens GN=ITIH2 PE=1 SV=1	HUMAN	4		Q15056
490	2.29	2.29	15.91	6.818	6.818	tr|B4DY09|B4DY09_HUMAN	Interleukin enhancer-binding factor 2 OS=Homo sapiens GN=ILF2 PE=1 SV=1	HUMAN	2		P61224
707	0.85	2.01	8.04	8.04	8.04	sp|P20809|IL11_HUMAN	Interleukin-11 OS=Homo sapiens GN=IL11 PE=1 SV=1	HUMAN	2		Q86UY0
52	32.55	32.55	65.46	55.22	47.76	sp|P03956|MMP1_HUMAN	Interstitial collagenase OS=Homo sapiens GN=MMP1 PE=1 SV=3	HUMAN	22		Q7Z7M9
250	6.51	6.51	38.59	23.49	15.1	sp|Q96CN7|ISOC1_HUMAN	Isochorismatase domain-containing protein 1 OS=Homo sapiens GN=ISOC1 PE=1 SV=3	HUMAN	3		Q13162
16	69.36	71.24	56.68	52.05	50.86	sp|P13645|K1C10_HUMAN	Keratin, type I cytoskeletal 10 OS=Homo sapiens GN=KRT10 PE=1 SV=6	HUMAN	63		P60174
75	23.46	31.41	55.3	44.28	38.35	sp|P02533|K1C14_HUMAN	Keratin, type I cytoskeletal 14 OS=Homo sapiens GN=KRT14 PE=1 SV=4	HUMAN	23		Q08629
330	4.69	24.35	47.36	31.71	30.44	sp|P08779|K1C16_HUMAN	Keratin, type I cytoskeletal 16 OS=Homo sapiens GN=KRT16 PE=1 SV=4	HUMAN	20		P60866
43	36.94	39.39	74.8	53.13	45.59	sp|P35527|K1C9_HUMAN	Keratin, type I cytoskeletal 9 OS=Homo sapiens GN=KRT9 PE=1 SV=3	HUMAN	25		Q15631
8	96.59	96.59	75.47	69.25	68.79	sp|P04264|K2C1_HUMAN	Keratin, type II cytoskeletal 1 OS=Homo sapiens GN=KRT1 PE=1 SV=6	HUMAN	67		Q5T985
21	63.52	82.33	89.2	79.97	76.68	sp|P35908|K22E_HUMAN	Keratin, type II cytoskeletal 2 epidermal OS=Homo sapiens GN=KRT2 PE=1 SV=2	HUMAN	53		E7EUY5
90	19.14	33.69	47.63	30.68	25.59	sp|P13647|K2C5_HUMAN	Keratin, type II cytoskeletal 5 OS=Homo sapiens GN=KRT5 PE=1 SV=3	HUMAN	23		P62987
159	10.93	35.06	46.99	33.69	26.95	sp|P02538|K2C6A_HUMAN	Keratin, type II cytoskeletal 6A OS=Homo sapiens GN=KRT6A PE=1 SV=3	HUMAN	23		Q96CG8
348	4.28	36.04	42.38	33.69	28.55	sp|P04259|K2C6B_HUMAN	Keratin, type II cytoskeletal 6B OS=Homo sapiens GN=KRT6B PE=1 SV=5	HUMAN	24		Q9BWS9
85	20.89	20.89	54.81	47.52	42.57	tr|F5GZN3|F5GZN3_HUMAN	Lactadherin OS=Homo sapiens GN=MFGE8 PE=1 SV=1	HUMAN	14		Q8IXL6
735	0.69	1.66	14.52	4.677	3.065	tr|J9JID7|J9JID7_HUMAN	Lamin B2, isoform CRA_a OS=Homo sapiens GN=LMNB2 PE=1 SV=1	HUMAN	3		Q16394
10	89.39	89.46	41.3	36.62	31.28	tr|A0A0A0MTC7|A0A0A0MTC7_HUMAN	Laminin subunit alpha-4 OS=Homo sapiens GN=LAMA4 PE=1 SV=1	HUMAN	46		P24593
17	67.62	68.59	33.92	25.69	19.83	tr|G3XAI2|G3XAI2_HUMAN	Laminin subunit beta-1 OS=Homo sapiens GN=LAMB1 PE=1 SV=1	HUMAN	37		B1AK88
145	12.18	12.7	16.35	6.674	5.117	sp|P55268|LAMB2_HUMAN	Laminin subunit beta-2 OS=Homo sapiens GN=LAMB2 PE=1 SV=2	HUMAN	6		V9HW75
23	56.58	56.58	38.35	27.78	23.49	sp|P11047|LAMC1_HUMAN	Laminin subunit gamma-1 OS=Homo sapiens GN=LAMC1 PE=1 SV=3	HUMAN	29		P07900
173	10.11	10.11	13.77	6.159	5.52	sp|Q14766|LTBP1_HUMAN	Latent-transforming growth factor beta-binding protein 1 OS=Homo sapiens GN=LTBP1 PE=1 SV=4	HUMAN	5		D6R9P3
40	39.64	39.64	23.75	18.51	15.81	tr|G3V3X5|G3V3X5_HUMAN	Latent-transforming growth factor beta-binding protein 2 OS=Homo sapiens GN=LTBP2 PE=1 SV=1	HUMAN	23		P50991
227	7.41	7.41	52.11	44.44	21.84	sp|Q14847|LASP1_HUMAN	LIM and SH3 domain protein 1 OS=Homo sapiens GN=LASP1 PE=1 SV=2	HUMAN	5		Q02742
32	48.56	48.56	69.88	63.25	57.83	sp|P00338|LDHA_HUMAN	L-lactate dehydrogenase A chain OS=Homo sapiens GN=LDHA PE=1 SV=2	HUMAN	38		B4DUT8
97	18.08	21.31	49.1	45.81	34.13	sp|P07195|LDHB_HUMAN	L-lactate dehydrogenase B chain OS=Homo sapiens GN=LDHB PE=1 SV=2	HUMAN	15		P07858
378	3.93	3.94	25.32	24.05	12.66	sp|P24666|PPAC_HUMAN	Low molecular weight phosphotyrosine protein phosphatase OS=Homo sapiens GN=ACP1 PE=1 SV=3	HUMAN	2		P04899
53	32.2	32.2	52.07	46.15	44.08	sp|P51884|LUM_HUMAN	Lumican OS=Homo sapiens GN=LUM PE=1 SV=2	HUMAN	25		Q96RW7
120	15.13	15.13	36.76	33.1	27.35	sp|Q08397|LOXL1_HUMAN	Lysyl oxidase homolog 1 OS=Homo sapiens GN=LOXL1 PE=1 SV=2	HUMAN	9		E9PF17
714	0.82	6.07	34.78	23.67	21.26	tr|H0YAR1|H0YAR1_HUMAN	Lysyl oxidase homolog 2 (Fragment) OS=Homo sapiens GN=LOXL2 PE=1 SV=1	HUMAN	4		G3XAM2
102	17.6	17.73	31.01	20.28	18.73	sp|Q9Y4K0|LOXL2_HUMAN	Lysyl oxidase homolog 2 OS=Homo sapiens GN=LOXL2 PE=1 SV=1	HUMAN	12		P51149
402	3.41	3.41	33.33	23.28	7.184	sp|P40121|CAPG_HUMAN	Macrophage-capping protein OS=Homo sapiens GN=CAPG PE=1 SV=2	HUMAN	3		P46940
162	10.87	10.87	34.13	26.35	26.35	sp|P40925|MDHC_HUMAN	Malate dehydrogenase, cytoplasmic OS=Homo sapiens GN=MDH1 PE=1 SV=4	HUMAN	7		P25398
163	10.79	10.79	37.57	26.04	23.37	sp|P40926|MDHM_HUMAN	Malate dehydrogenase, mitochondrial OS=Homo sapiens GN=MDH2 PE=1 SV=3	HUMAN	6		O00299
448	2.84	2.84	20.98	6.891	5.819	sp|P33908|MA1A1_HUMAN	Mannosyl-oligosaccharide 1,2-alpha-mannosidase IA OS=Homo sapiens GN=MAN1A1 PE=1 SV=3	HUMAN	3		P30040
471	2.53	2.53	40.78	23.3	23.3	sp|P08493|MGP_HUMAN	Matrix Gla protein OS=Homo sapiens GN=MGP PE=1 SV=2	HUMAN	2		P62913
253	6.4	6.4	26.29	7.732	6.014	sp|P50281|MMP14_HUMAN	Matrix metalloproteinase-14 OS=Homo sapiens GN=MMP14 PE=1 SV=3	HUMAN	3		Q9NR12
334	4.6	4.6	18.78	10.86	8.597	sp|Q9BRK3|MXRA8_HUMAN	Matrix-remodeling-associated protein 8 OS=Homo sapiens GN=MXRA8 PE=2 SV=1	HUMAN	4		Q14697
240	6.92	6.92	37.91	30.77	15.38	sp|P55145|MANF_HUMAN	Mesencephalic astrocyte-derived neurotrophic factor OS=Homo sapiens GN=MANF PE=1 SV=3	HUMAN	6		O95450
172	10.17	10.17	71.98	40.58	38.65	sp|P01033|TIMP1_HUMAN	Metalloproteinase inhibitor 1 OS=Homo sapiens GN=TIMP1 PE=1 SV=1	HUMAN	10		Q96KP4
67	26.4	26.4	64.55	55.45	54.09	sp|P16035|TIMP2_HUMAN	Metalloproteinase inhibitor 2 OS=Homo sapiens GN=TIMP2 PE=1 SV=2	HUMAN	31		Q5KU26
681	1	1	18.01	16.11	11.85	sp|P35625|TIMP3_HUMAN	Metalloproteinase inhibitor 3 OS=Homo sapiens GN=TIMP3 PE=1 SV=2	HUMAN	2		P80723
198	8.63	8.63	47.76	47.39	35.07	sp|Q15691|MARE1_HUMAN	Microtubule-associated protein RP/EB family member 1 OS=Homo sapiens GN=MAPRE1 PE=1 SV=3	HUMAN	6		Q14019
646	1.32	1.33	14.35	11.57	11.57	sp|Q9H8S9|MOB1A_HUMAN	MOB kinase activator 1A OS=Homo sapiens GN=MOB1A PE=1 SV=4	HUMAN	3		P62857
20	64.44	64.44	68.28	59.45	49.05	sp|P26038|MOES_HUMAN	Moesin OS=Homo sapiens GN=MSN PE=1 SV=3	HUMAN	37		P13667
439	2.96	2.96	29.17	11.9	11.9	tr|E9PR47|E9PR47_HUMAN	Mth938 domain-containing protein OS=Homo sapiens GN=AAMDC PE=1 SV=1	HUMAN	2		M0QXB4
178	9.9	9.9	55.46	32.35	32.35	tr|B7Z6Z4|B7Z6Z4_HUMAN	Myosin light polypeptide 6 OS=Homo sapiens GN=MYL6 PE=1 SV=1	HUMAN	8		A0A087X1Z3
222	7.51	7.51	55.37	40.68	33.33	tr|J3QRS3|J3QRS3_HUMAN	Myosin regulatory light chain 12A OS=Homo sapiens GN=MYL12A PE=1 SV=1	HUMAN	7		P05154
593	1.87	4.48	55.23	40.12	34.3	sp|P24844|MYL9_HUMAN	Myosin regulatory light polypeptide 9 OS=Homo sapiens GN=MYL9 PE=1 SV=4	HUMAN	6		P62277
1007	0.07	2.15	12.48	1.103	0.802	sp|Q7Z406|MYH14_HUMAN	Myosin-14 OS=Homo sapiens GN=MYH14 PE=1 SV=2	HUMAN	2		H0YMZ1
166	10.51	10.67	13.67	7.296	4.694	sp|P35579|MYH9_HUMAN	Myosin-9 OS=Homo sapiens GN=MYH9 PE=1 SV=4	HUMAN	6		P20290
193	9.03	9.03	34.55	28.79	21.21	tr|A0A087WZH7|A0A087WZH7_HUMAN	Myristoylated alanine-rich C-kinase substrate OS=Homo sapiens GN=MARCKS PE=1 SV=1	HUMAN	4		A0A087WVQ6
460	2.66	2.66	9.625	1.396	1.396	sp|E9PAV3|NACAM_HUMAN	Nascent polypeptide-associated complex subunit alpha, muscle-specific form OS=Homo sapiens GN=NACA PE=1 SV=1	HUMAN	2		P47755
370	4	4	11.43	2.806	2.806	sp|Q92859|NEO1_HUMAN	Neogenin OS=Homo sapiens GN=NEO1 PE=1 SV=2	HUMAN	2		Q01469
270	6.11	6.11	24.99	7.08	2.598	sp|Q09666|AHNK_HUMAN	Neuroblast differentiation-associated protein AHNAK OS=Homo sapiens GN=AHNAK PE=1 SV=2	HUMAN	4		P08779
150	11.49	11.49	22.16	17.61	17.61	tr|Q5T7F0|Q5T7F0_HUMAN	Neuropilin-1 OS=Homo sapiens GN=NRP1 PE=1 SV=1	HUMAN	7		P62316
313	4.99	4.99	15.04	6.462	5.508	sp|Q14697|GANAB_HUMAN	Neutral alpha-glucosidase AB OS=Homo sapiens GN=GANAB PE=1 SV=3	HUMAN	4		P61019
475	2.44	2.44	16.67	9.848	9.848	sp|P40261|NNMT_HUMAN	Nicotinamide N-methyltransferase OS=Homo sapiens GN=NNMT PE=1 SV=1	HUMAN	3		O14818
144	12.23	12.23	21.57	10.1	9.302	sp|P14543|NID1_HUMAN	Nidogen-1 OS=Homo sapiens GN=NID1 PE=1 SV=3	HUMAN	6		Q9BRK3
746	0.63	0.63	11.88	6.216	3.473	sp|P22307|NLTP_HUMAN	Non-specific lipid-transfer protein OS=Homo sapiens GN=SCP2 PE=1 SV=2	HUMAN	2		P36871
29	49.33	49.33	81.34	57.92	57.27	sp|Q02818|NUCB1_HUMAN	Nucleobindin-1 OS=Homo sapiens GN=NUCB1 PE=1 SV=4	HUMAN	30		P02765
205	8.21	8.21	44.9	28.91	24.49	sp|P06748|NPM_HUMAN	Nucleophosmin OS=Homo sapiens GN=NPM1 PE=1 SV=2	HUMAN	6		J3KMX3
544	2	14.68	70.39	53.29	53.29	sp|P15531|NDKA_HUMAN	Nucleoside diphosphate kinase A OS=Homo sapiens GN=NME1 PE=1 SV=1	HUMAN	13		P62258
80	21.76	21.76	73.63	61.64	59.93	tr|Q32Q12|Q32Q12_HUMAN	Nucleoside diphosphate kinase OS=Homo sapiens GN=NME1-NME2 PE=1 SV=1	HUMAN	21		E9PRY8
72	24.49	24.49	33.5	33.5	30.54	sp|Q9NRN5|OLFL3_HUMAN	Olfactomedin-like protein 3 OS=Homo sapiens GN=OLFML3 PE=2 SV=1	HUMAN	21		P30043
453	2.81	2.81	35.94	13.02	8.333	tr|H0YGR4|H0YGR4_HUMAN	Oligoribonuclease, mitochondrial (Fragment) OS=Homo sapiens GN=REXO2 PE=1 SV=1	HUMAN	2		P62851
242	6.85	6.85	27.47	22.34	19.05	sp|Q86UD1|OAF_HUMAN	Out at first protein homolog OS=Homo sapiens GN=OAF PE=2 SV=1	HUMAN	4		Q9HB71
412	3.31	3.31	8.974	1.352	1.352	sp|Q13219|PAPP1_HUMAN	Pappalysin-1 OS=Homo sapiens GN=PAPPA PE=1 SV=3	HUMAN	2		C9JP16
192	9.12	9.12	17.28	13.09	11.07	sp|Q96HC4|PDLI5_HUMAN	PDZ and LIM domain protein 5 OS=Homo sapiens GN=PDLIM5 PE=1 SV=5	HUMAN	5		Q96AY3
312	5.01	5.01	21.01	10.94	7.002	sp|Q9NR12|PDLI7_HUMAN	PDZ and LIM domain protein 7 OS=Homo sapiens GN=PDLIM7 PE=1 SV=1	HUMAN	3		Q9Y281
140	12.57	12.59	44.09	24.41	20.21	sp|P26022|PTX3_HUMAN	Pentraxin-related protein PTX3 OS=Homo sapiens GN=PTX3 PE=1 SV=3	HUMAN	10		Q9Y376
133	13.17	14.62	84.24	69.09	42.42	sp|P62937|PPIA_HUMAN	Peptidyl-prolyl cis-trans isomerase A OS=Homo sapiens GN=PPIA PE=1 SV=2	HUMAN	13		Q14393
63	28.34	28.34	75.93	69.44	60.19	sp|P23284|PPIB_HUMAN	Peptidyl-prolyl cis-trans isomerase B OS=Homo sapiens GN=PPIB PE=1 SV=2	HUMAN	26		P04259
484	2.36	4.5	32.08	19.81	16.98	sp|P45877|PPIC_HUMAN	Peptidyl-prolyl cis-trans isomerase C OS=Homo sapiens GN=PPIC PE=1 SV=1	HUMAN	6		O00300
344	4.4	4.4	26.98	8.935	2.234	sp|Q96AY3|FKB10_HUMAN	Peptidyl-prolyl cis-trans isomerase FKBP10 OS=Homo sapiens GN=FKBP10 PE=1 SV=1	HUMAN	2		Q5HYB6
375	4	4	29.63	25	25	sp|P62942|FKB1A_HUMAN	Peptidyl-prolyl cis-trans isomerase FKBP1A OS=Homo sapiens GN=FKBP1A PE=1 SV=2	HUMAN	3		Q16555
254	6.4	6.4	32.14	17.41	17.41	sp|Q00688|FKBP3_HUMAN	Peptidyl-prolyl cis-trans isomerase FKBP3 OS=Homo sapiens GN=FKBP3 PE=1 SV=1	HUMAN	4		P27348
445	2.9	2.9	33.13	25.77	25.77	sp|Q13526|PIN1_HUMAN	Peptidyl-prolyl cis-trans isomerase NIMA-interacting 1 OS=Homo sapiens GN=PIN1 PE=1 SV=1	HUMAN	3		Q96A72
387	3.71	3.71	59.54	19.08	19.08	sp|Q9Y237|PIN4_HUMAN	Peptidyl-prolyl cis-trans isomerase NIMA-interacting 4 OS=Homo sapiens GN=PIN4 PE=1 SV=1	HUMAN	3		Q14974
443	2.93	94.5	70.05	65.1	62.5	tr|B1ALD9|B1ALD9_HUMAN	Periostin OS=Homo sapiens GN=POSTN PE=1 SV=1	HUMAN	90		D6RGI3
9	96.03	96.03	70.69	65.91	62.32	sp|Q15063|POSTN_HUMAN	Periostin OS=Homo sapiens GN=POSTN PE=1 SV=2	HUMAN	90		Q01518
19	64.64	64.64	45.44	31.91	28.6	sp|Q92626|PXDN_HUMAN	Peroxidasin homolog OS=Homo sapiens GN=PXDN PE=1 SV=2	HUMAN	37		P49767
61	28.73	28.73	54.77	52.26	52.26	sp|Q06830|PRDX1_HUMAN	Peroxiredoxin-1 OS=Homo sapiens GN=PRDX1 PE=1 SV=1	HUMAN	20		O95394
104	17.47	19.64	44.95	42.42	42.42	sp|P32119|PRDX2_HUMAN	Peroxiredoxin-2 OS=Homo sapiens GN=PRDX2 PE=1 SV=5	HUMAN	16		P78539
281	5.89	11.5	37.64	31.73	21.03	sp|Q13162|PRDX4_HUMAN	Peroxiredoxin-4 OS=Homo sapiens GN=PRDX4 PE=1 SV=1	HUMAN	7		Q86SR1
206	8.07	8.07	29.91	28.97	28.97	sp|P30044|PRDX5_HUMAN	Peroxiredoxin-5, mitochondrial OS=Homo sapiens GN=PRDX5 PE=1 SV=4	HUMAN	5		O15143
134	13.12	13.12	61.61	37.5	33.48	sp|P30041|PRDX6_HUMAN	Peroxiredoxin-6 OS=Homo sapiens GN=PRDX6 PE=1 SV=3	HUMAN	7		O94907
224	7.48	7.48	36.9	34.76	30.48	sp|P30086|PEBP1_HUMAN	Phosphatidylethanolamine-binding protein 1 OS=Homo sapiens GN=PEBP1 PE=1 SV=3	HUMAN	4		Q12792
358	4.06	4.06	15.31	9.963	8.303	sp|O95394|AGM1_HUMAN	Phosphoacetylglucosamine mutase OS=Homo sapiens GN=PGM3 PE=1 SV=1	HUMAN	2		Q9UHV9
335	4.57	4.57	25.62	12.28	9.253	sp|P36871|PGM1_HUMAN	Phosphoglucomutase-1 OS=Homo sapiens GN=PGM1 PE=1 SV=3	HUMAN	3		P78417
103	17.53	17.53	43.41	39.57	29.5	sp|P00558|PGK1_HUMAN	Phosphoglycerate kinase 1 OS=Homo sapiens GN=PGK1 PE=1 SV=3	HUMAN	10		Q8NCH0
123	14.73	15.53	56.3	55.91	48.82	sp|P18669|PGAM1_HUMAN	Phosphoglycerate mutase 1 OS=Homo sapiens GN=PGAM1 PE=1 SV=2	HUMAN	11		Q04446
62	28.42	28.42	61.72	52.15	49.76	sp|P36955|PEDF_HUMAN	Pigment epithelium-derived factor OS=Homo sapiens GN=SERPINF1 PE=1 SV=4	HUMAN	26		Q32P28
87	20.16	20.21	28.8	24.6	22.2	sp|P05155|IC1_HUMAN	Plasma protease C1 inhibitor OS=Homo sapiens GN=SERPING1 PE=1 SV=2	HUMAN	10		P01889
323	4.82	4.82	8.621	3.448	3.448	sp|P05154|IPSP_HUMAN	Plasma serine protease inhibitor OS=Homo sapiens GN=SERPINA5 PE=1 SV=3	HUMAN	3		Q92859
15	72.02	72.02	92.04	81.84	81.09	sp|P05121|PAI1_HUMAN	Plasminogen activator inhibitor 1 OS=Homo sapiens GN=SERPINE1 PE=1 SV=1	HUMAN	119		O00410
78	22.71	23.03	47.14	30.16	28.1	sp|P13797|PLST_HUMAN	Plastin-3 OS=Homo sapiens GN=PLS3 PE=1 SV=4	HUMAN	13		A6NLN1
450	2.84	2.84	12.23	12.23	12.23	sp|P68402|PA1B2_HUMAN	Platelet-activating factor acetylhydrolase IB subunit beta OS=Homo sapiens GN=PAFAH1B2 PE=1 SV=1	HUMAN	2		P61353
148	11.74	11.82	20.54	3.501	1.836	sp|Q15149|PLEC_HUMAN	Plectin OS=Homo sapiens GN=PLEC PE=1 SV=3	HUMAN	7		A0A087X020
232	7.12	7.12	41.01	20.51	18.26	sp|Q15365|PCBP1_HUMAN	Poly(rC)-binding protein 1 OS=Homo sapiens GN=PCBP1 PE=1 SV=2	HUMAN	4		P62942
515	2.04	2.93	21.59	17.28	10.96	tr|H3BRU6|H3BRU6_HUMAN	Poly(rC)-binding protein 2 (Fragment) OS=Homo sapiens GN=PCBP2 PE=1 SV=1	HUMAN	2		P61604
257	6.37	6.37	29.09	10.22	8.962	sp|P11940|PABP1_HUMAN	Polyadenylate-binding protein 1 OS=Homo sapiens GN=PABPC1 PE=1 SV=2	HUMAN	5		B5MDF5
360	4.04	4.04	16.92	8.126	4.478	sp|Q86SR1|GLT10_HUMAN	Polypeptide N-acetylgalactosaminyltransferase 10 OS=Homo sapiens GN=GALNT10 PE=1 SV=2	HUMAN	2		P24666
280	5.9	5.9	15.43	5.851	4.574	sp|Q7Z7M9|GALT5_HUMAN	Polypeptide N-acetylgalactosaminyltransferase 5 OS=Homo sapiens GN=GALNT5 PE=1 SV=1	HUMAN	3		B0YIW6
410	3.34	3.34	17.04	5.949	5.949	sp|Q8NCL4|GALT6_HUMAN	Polypeptide N-acetylgalactosaminyltransferase 6 OS=Homo sapiens GN=GALNT6 PE=2 SV=2	HUMAN	2		H0YJ34
372	4	4	18.41	8.159	8.159	tr|A6NLN1|A6NLN1_HUMAN	Polypyrimidine tract binding protein 1, isoform CRA_b OS=Homo sapiens GN=PTBP1 PE=1 SV=4	HUMAN	2		G5E9Q6
364	4.01	4.02	57.14	35.06	22.73	sp|Q9UHV9|PFD2_HUMAN	Prefoldin subunit 2 OS=Homo sapiens GN=PFDN2 PE=1 SV=1	HUMAN	3		P10599
233	7.1	7.1	34.37	16.71	13.84	sp|Q00888|PSG4_HUMAN	Pregnancy-specific beta-1-glycoprotein 4 OS=Homo sapiens GN=PSG4 PE=2 SV=3	HUMAN	4		P11413
698	0.9	5.53	25.23	15.65	11.21	tr|M0R1G9|M0R1G9_HUMAN	Pregnancy-specific beta-1-glycoprotein 5 OS=Homo sapiens GN=PSG5 PE=1 SV=1	HUMAN	3		P06703
39	41.75	42.05	52.26	49.25	42.17	sp|P02545|LMNA_HUMAN	Prelamin-A/C OS=Homo sapiens GN=LMNA PE=1 SV=1	HUMAN	25		Q92954
55	31.27	31.27	62.58	50.78	43.65	sp|Q15113|PCOC1_HUMAN	Procollagen C-endopeptidase enhancer 1 OS=Homo sapiens GN=PCOLCE PE=1 SV=2	HUMAN	26		O60869
101	17.74	17.74	35.9	24.9	16.37	sp|Q02809|PLOD1_HUMAN	Procollagen-lysine,2-oxoglutarate 5-dioxygenase 1 OS=Homo sapiens GN=PLOD1 PE=1 SV=2	HUMAN	9		Q9Y237
107	16.99	17.23	33.11	19.95	18.32	sp|O00469|PLOD2_HUMAN	Procollagen-lysine,2-oxoglutarate 5-dioxygenase 2 OS=Homo sapiens GN=PLOD2 PE=1 SV=2	HUMAN	11		P46777
149	11.58	11.58	67.79	39.7	34.46	sp|P01210|PENK_HUMAN	Proenkephalin-A OS=Homo sapiens GN=PENK PE=1 SV=1	HUMAN	12		H3BTH8
381	3.89	3.89	23.4	16.49	16.49	tr|G5E9Q6|G5E9Q6_HUMAN	Profilin OS=Homo sapiens GN=PFN2 PE=1 SV=1	HUMAN	3		O00487
98	17.95	17.95	75	74.29	67.14	sp|P07737|PROF1_HUMAN	Profilin-1 OS=Homo sapiens GN=PFN1 PE=1 SV=2	HUMAN	18		Q8TEA8
449	2.84	2.84	35.6	10.47	10.47	sp|O75340|PDCD6_HUMAN	Programmed cell death protein 6 OS=Homo sapiens GN=PDCD6 PE=1 SV=1	HUMAN	2		P52943
446	2.88	2.98	19.18	19.18	15.07	sp|P12273|PIP_HUMAN	Prolactin-inducible protein OS=Homo sapiens GN=PIP PE=1 SV=1	HUMAN	2		B0QYN7
368	4.01	4.01	7.337	3.397	3.397	sp|Q32P28|P3H1_HUMAN	Prolyl 3-hydroxylase 1 OS=Homo sapiens GN=LEPRE1 PE=1 SV=2	HUMAN	2		P49720
245	6.72	6.72	48.59	29.32	20.08	sp|Q06323|PSME1_HUMAN	Proteasome activator complex subunit 1 OS=Homo sapiens GN=PSME1 PE=1 SV=1	HUMAN	6		P81605
322	4.84	4.96	34.65	22.05	20.08	tr|A0A087X1Z3|A0A087X1Z3_HUMAN	Proteasome activator complex subunit 2 OS=Homo sapiens GN=PSME2 PE=1 SV=1	HUMAN	4		Q15019
325	4.79	4.79	19.09	18.18	12.27	tr|H0YMZ1|H0YMZ1_HUMAN	Proteasome subunit alpha type (Fragment) OS=Homo sapiens GN=PSMA4 PE=1 SV=4	HUMAN	3		H7BY58
169	10.23	10.23	38.49	28.57	24.6	tr|G3V5Z7|G3V5Z7_HUMAN	Proteasome subunit alpha type OS=Homo sapiens GN=PSMA6 PE=1 SV=1	HUMAN	5		Q99426
180	9.8	9.8	43.73	37.26	34.98	sp|P25786|PSA1_HUMAN	Proteasome subunit alpha type-1 OS=Homo sapiens GN=PSMA1 PE=1 SV=1	HUMAN	7		P00491
151	11.31	11.31	46.58	40.6	32.48	sp|P25787|PSA2_HUMAN	Proteasome subunit alpha type-2 OS=Homo sapiens GN=PSMA2 PE=1 SV=2	HUMAN	5		P17931
259	6.3	6.3	36.47	18.82	12.94	sp|P25788|PSA3_HUMAN	Proteasome subunit alpha type-3 OS=Homo sapiens GN=PSMA3 PE=1 SV=2	HUMAN	3		Q13838
266	6.16	6.17	41.08	31.12	25.31	sp|P28066|PSA5_HUMAN	Proteasome subunit alpha type-5 OS=Homo sapiens GN=PSMA5 PE=1 SV=3	HUMAN	5		P40121
333	4.61	4.61	58.87	25.4	10.08	sp|O14818|PSA7_HUMAN	Proteasome subunit alpha type-7 OS=Homo sapiens GN=PSMA7 PE=1 SV=1	HUMAN	2		P06576
147	11.91	11.91	53.94	44.81	40.66	sp|P20618|PSB1_HUMAN	Proteasome subunit beta type-1 OS=Homo sapiens GN=PSMB1 PE=1 SV=2	HUMAN	8		Q9UKY7
274	6.02	6.02	51.24	34.83	34.83	sp|P49721|PSB2_HUMAN	Proteasome subunit beta type-2 OS=Homo sapiens GN=PSMB2 PE=1 SV=1	HUMAN	6		Q5JXB2
394	3.52	3.52	44.39	20	20	sp|P49720|PSB3_HUMAN	Proteasome subunit beta type-3 OS=Homo sapiens GN=PSMB3 PE=1 SV=2	HUMAN	3		Q13444
267	6.16	6.16	59.09	30.68	25.38	sp|P28070|PSB4_HUMAN	Proteasome subunit beta type-4 OS=Homo sapiens GN=PSMB4 PE=1 SV=4	HUMAN	5		O43396
168	10.27	10.27	66.54	44.49	36.88	sp|P28074|PSB5_HUMAN	Proteasome subunit beta type-5 OS=Homo sapiens GN=PSMB5 PE=1 SV=3	HUMAN	7		P21980
221	7.56	7.56	29.29	29.29	25.52	sp|P28072|PSB6_HUMAN	Proteasome subunit beta type-6 OS=Homo sapiens GN=PSMB6 PE=1 SV=4	HUMAN	5		P62140
430	3.09	3.09	17.52	8.895	6.739	tr|H7C2I1|H7C2I1_HUMAN	Protein arginine N-methyltransferase 1 OS=Homo sapiens GN=PRMT1 PE=1 SV=1	HUMAN	2		Q8NCL4
164	10.74	10.74	28.73	28.73	28.73	tr|F8WCF6|F8WCF6_HUMAN	Protein ARPC4-TTLL3 OS=Homo sapiens GN=ARPC4-TTLL3 PE=1 SV=1	HUMAN	6		P61086
279	5.9	5.9	40.56	22.5	12.22	tr|Q86UY0|Q86UY0_HUMAN	Protein BLOC1S5-TXNDC5 OS=Homo sapiens GN=TXNDC5 PE=1 SV=1	HUMAN	4		Q13219
404	3.38	3.38	47.67	27.91	27.91	sp|Q9UKY7|CDV3_HUMAN	Protein CDV3 homolog OS=Homo sapiens GN=CDV3 PE=1 SV=1	HUMAN	2		O75787
137	13.03	13.03	75.66	63.49	58.73	sp|Q99497|PARK7_HUMAN	Protein deglycase DJ-1 OS=Homo sapiens GN=PARK7 PE=1 SV=2	HUMAN	9		O43184
33	48.46	48.46	58.81	57.23	55.45	sp|P30101|PDIA3_HUMAN	Protein disulfide-isomerase A3 OS=Homo sapiens GN=PDIA3 PE=1 SV=4	HUMAN	28		H0YMF4
320	4.86	4.92	36.43	13.64	6.822	sp|P13667|PDIA4_HUMAN	Protein disulfide-isomerase A4 OS=Homo sapiens GN=PDIA4 PE=1 SV=2	HUMAN	4		A0A087WXW9
92	18.96	18.96	45	34.77	33.41	sp|Q15084|PDIA6_HUMAN	Protein disulfide-isomerase A6 OS=Homo sapiens GN=PDIA6 PE=1 SV=1	HUMAN	11		P53004
84	20.97	20.97	60.04	44.09	33.46	sp|P07237|PDIA1_HUMAN	Protein disulfide-isomerase OS=Homo sapiens GN=P4HB PE=1 SV=3	HUMAN	13		P48061
353	4.14	4.14	41.89	27.03	13.51	sp|Q96A72|MGN2_HUMAN	Protein mago nashi homolog 2 OS=Homo sapiens GN=MAGOHB PE=1 SV=1	HUMAN	2		X6R8A1
507	2.1	2.1	27.84	27.84	27.84	sp|P60903|S10AA_HUMAN	Protein S100-A10 OS=Homo sapiens GN=S100A10 PE=1 SV=2	HUMAN	2		O76003
187	9.58	9.58	59.05	56.19	45.71	sp|P31949|S10AB_HUMAN	Protein S100-A11 OS=Homo sapiens GN=S100A11 PE=1 SV=2	HUMAN	7		O00303
213	7.86	7.86	55.1	55.1	48.98	sp|Q99584|S10AD_HUMAN	Protein S100-A13 OS=Homo sapiens GN=S100A13 PE=1 SV=1	HUMAN	6		C9J3R8
229	7.36	7.36	48.54	48.54	36.89	sp|Q96FQ6|S10AG_HUMAN	Protein S100-A16 OS=Homo sapiens GN=S100A16 PE=1 SV=1	HUMAN	4		Q13200
384	3.79	3.79	46.67	35.56	17.78	sp|P06703|S10A6_HUMAN	Protein S100-A6 OS=Homo sapiens GN=S100A6 PE=1 SV=1	HUMAN	2		P62314
408	3.35	3.35	19.07	5.386	5.386	sp|P21980|TGM2_HUMAN	Protein-glutamine gamma-glutamyltransferase 2 OS=Homo sapiens GN=TGM2 PE=1 SV=2	HUMAN	2		P60953
397	3.46	3.46	45.8	25.87	16.08	tr|H7BY58|H7BY58_HUMAN	Protein-L-isoaspartate O-methyltransferase OS=Homo sapiens GN=PCMT1 PE=1 SV=1	HUMAN	3		P30048
93	18.51	20.43	50.6	42.69	39.33	sp|P28300|LYOX_HUMAN	Protein-lysine 6-oxidase OS=Homo sapiens GN=LOX PE=1 SV=2	HUMAN	16		Q8WUJ3
385	3.76	3.76	12.61	2.279	1.923	sp|Q92954|PRG4_HUMAN	Proteoglycan 4 OS=Homo sapiens GN=PRG4 PE=1 SV=2	HUMAN	2		Q9UBI6
399	3.43	3.43	24.22	6.574	6.574	sp|P00491|PNPH_HUMAN	Purine nucleoside phosphorylase OS=Homo sapiens GN=PNP PE=1 SV=2	HUMAN	2		P25705
269	6.13	6.13	42.79	33.83	22.39	sp|Q92928|RAB1C_HUMAN	Putative Ras-related protein Rab-1C OS=Homo sapiens GN=RAB1C PE=5 SV=2	HUMAN	6		H7C2I1
405	3.38	3.38	32.68	13.73	13.73	sp|Q5JXB2|UE2NL_HUMAN	Putative ubiquitin-conjugating enzyme E2 N-like OS=Homo sapiens GN=UBE2NL PE=1 SV=1	HUMAN	2		P05198
37	44.35	44.35	64.22	50.47	50.47	sp|P14618|KPYM_HUMAN	Pyruvate kinase PKM OS=Homo sapiens GN=PKM PE=1 SV=4	HUMAN	27		P21796
263	6.21	6.21	28.92	28.92	22.59	sp|Q53FA7|QORX_HUMAN	Quinone oxidoreductase PIG3 OS=Homo sapiens GN=TP53I3 PE=1 SV=2	HUMAN	6		O43852
129	13.91	13.91	34.38	29.21	21.8	sp|P50395|GDIB_HUMAN	Rab GDP dissociation inhibitor beta OS=Homo sapiens GN=GDI2 PE=1 SV=2	HUMAN	9		Q969H8
1036	0.06	14.41	23.33	18.7	11.32	sp|P35241|RADI_HUMAN	Radixin OS=Homo sapiens GN=RDX PE=1 SV=1	HUMAN	9		H0YL18
307	5.1	5.11	12.25	3.923	2.836	sp|P46940|IQGA1_HUMAN	Ras GTPase-activating-like protein IQGAP1 OS=Homo sapiens GN=IQGAP1 PE=1 SV=1	HUMAN	3		P22314
230	7.3	7.3	31.41	30.69	20.94	sp|Q15404|RSU1_HUMAN	Ras suppressor protein 1 OS=Homo sapiens GN=RSU1 PE=1 SV=3	HUMAN	4		O00560
612	1.66	1.66	13.02	7.813	7.813	sp|P63000|RAC1_HUMAN	Ras-related C3 botulinum toxin substrate 1 OS=Homo sapiens GN=RAC1 PE=1 SV=1	HUMAN	2		P51148
528	2.01	4.89	23.5	16.5	16.5	sp|P61026|RAB10_HUMAN	Ras-related protein Rab-10 OS=Homo sapiens GN=RAB10 PE=1 SV=1	HUMAN	5		E9PR47
241	6.87	6.87	39.91	26.15	21.56	sp|Q15907|RB11B_HUMAN	Ras-related protein Rab-11B OS=Homo sapiens GN=RAB11B PE=1 SV=4	HUMAN	5		P62081
632	1.45	2.29	26.98	12.09	12.09	sp|P61106|RAB14_HUMAN	Ras-related protein Rab-14 OS=Homo sapiens GN=RAB14 PE=1 SV=4	HUMAN	4		J3KN29
332	4.64	4.64	29.72	18.4	18.4	sp|P61019|RAB2A_HUMAN	Ras-related protein Rab-2A OS=Homo sapiens GN=RAB2A PE=1 SV=1	HUMAN	3		P98179
942	0.12	0.84	17.27	17.27	5	sp|P20336|RAB3A_HUMAN	Ras-related protein Rab-3A OS=Homo sapiens GN=RAB3A PE=1 SV=1	HUMAN	3		B1ALD9
438	2.96	2.96	49.54	12.04	12.04	sp|P51148|RAB5C_HUMAN	Ras-related protein Rab-5C OS=Homo sapiens GN=RAB5C PE=1 SV=2	HUMAN	2		P62318
306	5.11	5.11	44.44	23.19	16.91	sp|P51149|RAB7A_HUMAN	Ras-related protein Rab-7a OS=Homo sapiens GN=RAB7A PE=1 SV=1	HUMAN	3		Q13526
505	2.13	2.13	18.45	12.62	12.62	sp|P11233|RALA_HUMAN	Ras-related protein Ral-A OS=Homo sapiens GN=RALA PE=1 SV=1	HUMAN	2		P12273
278	5.96	5.96	56.52	20.65	20.65	sp|P61224|RAP1B_HUMAN	Ras-related protein Rap-1b OS=Homo sapiens GN=RAP1B PE=1 SV=1	HUMAN	3		P07339
413	3.31	3.31	32.29	13.14	8.857	sp|O75787|RENR_HUMAN	Renin receptor OS=Homo sapiens GN=ATP6AP2 PE=1 SV=2	HUMAN	2		P33908
225	7.44	9.21	29.88	25	22.87	sp|Q96D15|RCN3_HUMAN	Reticulocalbin-3 OS=Homo sapiens GN=RCN3 PE=1 SV=1	HUMAN	5		O75340
1074	0.05	5.71	63.39	6.216	1.981	RRRRRsp|P02452|CO1A1_HUMAN	REVERSED Collagen alpha-1(I) chain OS=Homo sapiens GN=COL1A1 PE=1 SV=5	HUMAN	3		P68402
157	11.01	11.01	46.38	41.7	28.09	tr|J3QQX2|J3QQX2_HUMAN	Rho GDP-dissociation inhibitor 1 OS=Homo sapiens GN=ARHGDIA PE=1 SV=1	HUMAN	8		P12236
374	4	4	10.8	7.2	7.2	tr|A0A087X020|A0A087X020_HUMAN	Ribosome maturation protein SBDS OS=Homo sapiens GN=SBDS PE=1 SV=1	HUMAN	2		Q7L2H7
276	5.99	5.99	40.41	17.14	12.28	sp|P38159|RBMX_HUMAN	RNA-binding motif protein, X chromosome OS=Homo sapiens GN=RBMX PE=1 SV=3	HUMAN	4		H0YGR4
442	2.94	2.94	35.03	17.2	17.2	sp|P98179|RBM3_HUMAN	RNA-binding protein 3 OS=Homo sapiens GN=RBM3 PE=1 SV=1	HUMAN	2		P60981
264	6.21	6.21	55.75	37.36	32.18	sp|Q9Y5S9|RBM8A_HUMAN	RNA-binding protein 8A OS=Homo sapiens GN=RBM8A PE=1 SV=1	HUMAN	3		H0YA96
106	17.01	17.75	37.39	19.97	19.07	sp|O75326|SEM7A_HUMAN	Semaphorin-7A OS=Homo sapiens GN=SEMA7A PE=1 SV=1	HUMAN	9		P02649
355	4.11	4.11	22.59	10.12	5.176	tr|D6RGI3|D6RGI3_HUMAN	Septin 11, isoform CRA_b OS=Homo sapiens GN=SEPT11 PE=1 SV=1	HUMAN	2		P17612
396	3.49	3.49	31.02	7.756	7.756	sp|Q15019|SEPT2_HUMAN	Septin-2 OS=Homo sapiens GN=SEPT2 PE=1 SV=1	HUMAN	2		P08254
216	7.74	7.74	35.25	22.72	21.15	sp|O95084|PRS23_HUMAN	Serine protease 23 OS=Homo sapiens GN=PRSS23 PE=1 SV=1	HUMAN	5		P10316
79	22.58	22.58	45.83	36.25	36.25	sp|Q92743|HTRA1_HUMAN	Serine protease HTRA1 OS=Homo sapiens GN=HTRA1 PE=1 SV=1	HUMAN	13		E9PAV3
473	2.48	2.53	21.05	8.998	6.452	sp|P30153|2AAA_HUMAN	Serine/threonine-protein phosphatase 2A 65 kDa regulatory subunit A alpha isoform OS=Homo sapiens GN=PPP2R1A PE=1 SV=4	HUMAN	2		Q07065
409	3.34	3.36	31.8	17.74	11.62	sp|P62140|PP1B_HUMAN	Serine/threonine-protein phosphatase PP1-beta catalytic subunit OS=Homo sapiens GN=PPP1CB PE=1 SV=3	HUMAN	3		P62906
44	36.39	36.39	80.38	61.72	57.18	sp|P50454|SERPH_HUMAN	Serpin H1 OS=Homo sapiens GN=SERPINH1 PE=1 SV=2	HUMAN	28		H3BQB1
76	23.41	23.43	31.36	16.09	14.29	sp|P02768|ALBU_HUMAN	Serum albumin OS=Homo sapiens GN=ALB PE=1 SV=2	HUMAN	18		P05386
287	5.63	5.64	46.67	30.37	25.93	tr|E7EUY5|E7EUY5_HUMAN	Single-stranded DNA-binding protein, mitochondrial (Fragment) OS=Homo sapiens GN=SSBP1 PE=1 SV=1	HUMAN	3		P51665
424	3.16	3.19	39.5	20.17	20.17	sp|P62314|SMD1_HUMAN	Small nuclear ribonucleoprotein Sm D1 OS=Homo sapiens GN=SNRPD1 PE=1 SV=1	HUMAN	2		A6NJA2
331	4.68	4.68	38.14	38.14	38.14	sp|P62316|SMD2_HUMAN	Small nuclear ribonucleoprotein Sm D2 OS=Homo sapiens GN=SNRPD2 PE=1 SV=1	HUMAN	4		Q9BXJ0
444	2.9	2.9	47.62	20.63	20.63	sp|P62318|SMD3_HUMAN	Small nuclear ribonucleoprotein Sm D3 OS=Homo sapiens GN=SNRPD3 PE=1 SV=1	HUMAN	4		A0A087WYR3
558	2	2	11.13	0.9536	0.9536	sp|A1L4H1|SRCRL_HUMAN	Soluble scavenger receptor cysteine-rich domain-containing protein SSC5D OS=Homo sapiens GN=SSC5D PE=2 SV=3	HUMAN	2		P08493
651	1.27	1.28	40.12	15.43	11.11	sp|O60493|SNX3_HUMAN	Sorting nexin-3 OS=Homo sapiens GN=SNX3 PE=1 SV=3	HUMAN	2		I3L3M7
128	14.01	14.01	22.54	22.54	21.9	tr|D3DQH8|D3DQH8_HUMAN	SPARC OS=Homo sapiens GN=SPARC PE=1 SV=1	HUMAN	9		P30153
401	3.42	3.42	21.26	9.579	7.009	sp|Q13838|DX39B_HUMAN	Spliceosome RNA helicase DDX39B OS=Homo sapiens GN=DDX39B PE=1 SV=1	HUMAN	3		P49327
152	11.3	11.3	56.29	27.15	27.15	sp|O76061|STC2_HUMAN	Stanniocalcin-2 OS=Homo sapiens GN=STC2 PE=1 SV=1	HUMAN	11		P40261
215	7.78	7.78	46.31	36.91	36.24	sp|P16949|STMN1_HUMAN	Stathmin OS=Homo sapiens GN=STMN1 PE=1 SV=3	HUMAN	6		P61077
418	3.22	3.22	50.54	40.86	32.26	sp|P48061|SDF1_HUMAN	Stromal cell-derived factor 1 OS=Homo sapiens GN=CXCL12 PE=1 SV=1	HUMAN	6		P04004
458	2.7	2.7	19.08	7.966	3.774	sp|P08254|MMP3_HUMAN	Stromelysin-1 OS=Homo sapiens GN=MMP3 PE=1 SV=2	HUMAN	2		Q9NYL9
38	42.72	42.72	48.19	41.9	38.82	sp|O00391|QSOX1_HUMAN	Sulfhydryl oxidase 1 OS=Homo sapiens GN=QSOX1 PE=1 SV=3	HUMAN	26		Q07812
393	3.58	3.58	27.72	16.3	16.3	tr|B0QYN7|B0QYN7_HUMAN	SUMO-conjugating enzyme UBC9 OS=Homo sapiens GN=UBE2I PE=1 SV=1	HUMAN	3		K7ERI7
359	4.05	5.67	25.22	12.72	8.19	sp|P78539|SRPX_HUMAN	Sushi repeat-containing protein SRPX OS=Homo sapiens GN=SRPX PE=1 SV=1	HUMAN	3		P45877
437	2.96	2.96	39.26	26.51	20.13	sp|O00560|SDCB1_HUMAN	Syntenin-1 OS=Homo sapiens GN=SDCBP PE=1 SV=1	HUMAN	3		A0A087WXL3
74	24.03	24.03	21.13	12.16	10.55	sp|Q9Y490|TLN1_HUMAN	Talin-1 OS=Homo sapiens GN=TLN1 PE=1 SV=3	HUMAN	13		B4DY09
111	16.3	16.3	15.14	8.047	7.541	tr|D3YTG3|D3YTG3_HUMAN	Target of Nesh-SH3 OS=Homo sapiens GN=ABI3BP PE=1 SV=1	HUMAN	9		E9PRU1
256	6.38	7.85	28.24	13.85	13.85	sp|P17987|TCPA_HUMAN	T-complex protein 1 subunit alpha OS=Homo sapiens GN=TCP1 PE=1 SV=1	HUMAN	5		O60506
265	6.2	6.2	29.35	14.77	14.77	sp|P78371|TCPB_HUMAN	T-complex protein 1 subunit beta OS=Homo sapiens GN=CCT2 PE=1 SV=4	HUMAN	5		P21589
298	5.4	5.4	33.4	10.02	7.236	sp|P50991|TCPD_HUMAN	T-complex protein 1 subunit delta OS=Homo sapiens GN=CCT4 PE=1 SV=4	HUMAN	3		P11233
195	8.9	8.91	28.47	16.06	12.96	sp|P50990|TCPQ_HUMAN	T-complex protein 1 subunit theta OS=Homo sapiens GN=CCT8 PE=1 SV=4	HUMAN	6		P60903
203	8.34	8.34	27.68	22.03	16.01	sp|P40227|TCPZ_HUMAN	T-complex protein 1 subunit zeta OS=Homo sapiens GN=CCT6A PE=1 SV=3	HUMAN	5		Q96C19
46	36.18	36.18	22.67	14.95	14.22	sp|P24821|TENA_HUMAN	Tenascin OS=Homo sapiens GN=TNC PE=1 SV=3	HUMAN	19		H3BRU6
283	5.86	5.86	14.58	9.339	9.339	sp|Q08629|TICN1_HUMAN	Testican-1 OS=Homo sapiens GN=SPOCK1 PE=1 SV=1	HUMAN	4		P09972
472	2.51	2.51	30	30	30	tr|I3L3M7|I3L3M7_HUMAN	Thioredoxin domain-containing protein 17 OS=Homo sapiens GN=TXNDC17 PE=1 SV=1	HUMAN	2		Q02388
382	3.88	3.88	31.43	20.95	20.95	sp|P10599|THIO_HUMAN	Thioredoxin OS=Homo sapiens GN=TXN PE=1 SV=3	HUMAN	2		P61026
138	12.93	12.93	39.32	22.89	18.28	tr|A0A087WSY9|A0A087WSY9_HUMAN	Thioredoxin reductase 1, cytoplasmic OS=Homo sapiens GN=TXNRD1 PE=1 SV=1	HUMAN	6		P68363
426	3.15	3.15	17.19	17.19	9.766	sp|P30048|PRDX3_HUMAN	Thioredoxin-dependent peroxide reductase, mitochondrial OS=Homo sapiens GN=PRDX3 PE=1 SV=3	HUMAN	2		P15531
407	3.35	3.36	28.72	10.03	10.03	sp|O43396|TXNL1_HUMAN	Thioredoxin-like protein 1 OS=Homo sapiens GN=TXNL1 PE=1 SV=3	HUMAN	2		P24534
13	78.21	78.21	43.5	32.82	31.71	sp|P07996|TSP1_HUMAN	Thrombospondin-1 OS=Homo sapiens GN=THBS1 PE=1 SV=2	HUMAN	66		A1L4H1
59	30.18	36.2	28.16	20.22	20.14	sp|P35442|TSP2_HUMAN	Thrombospondin-2 OS=Homo sapiens GN=THBS2 PE=1 SV=2	HUMAN	21		P61981
587	1.89	4.05	14.99	3.485	3.485	tr|F5H4Z8|F5H4Z8_HUMAN	Thrombospondin-3 OS=Homo sapiens GN=THBS3 PE=1 SV=2	HUMAN	3		Q9UBS4
630	1.48	1.58	27.68	15.18	7.44	sp|O14657|TOR1B_HUMAN	Torsin-1B OS=Homo sapiens GN=TOR1B PE=1 SV=2	HUMAN	2		F5H4Z8
234	7.05	7.08	39.47	19.88	11.57	sp|P37837|TALDO_HUMAN	Transaldolase OS=Homo sapiens GN=TALDO1 PE=1 SV=2	HUMAN	4		P84077
326	4.79	4.79	29.61	15.53	15.53	sp|P20290|BTF3_HUMAN	Transcription factor BTF3 OS=Homo sapiens GN=BTF3 PE=1 SV=1	HUMAN	3		Q96IU4
119	15.41	15.41	36.67	26.41	26.15	sp|P01137|TGFB1_HUMAN	Transforming growth factor beta-1 OS=Homo sapiens GN=TGFB1 PE=1 SV=2	HUMAN	11		Q9UI42
247	6.7	6.71	25.12	13.29	11.35	sp|P61812|TGFB2_HUMAN	Transforming growth factor beta-2 OS=Homo sapiens GN=TGFB2 PE=1 SV=1	HUMAN	4		P24844
11	85.45	86.27	73.06	69.69	68.08	sp|Q15582|BGH3_HUMAN	Transforming growth factor-beta-induced protein ig-h3 OS=Homo sapiens GN=TGFBI PE=1 SV=1	HUMAN	119		P14550
41	38.68	38.68	93.53	86.57	77.61	sp|Q01995|TAGL_HUMAN	Transgelin OS=Homo sapiens GN=TAGLN PE=1 SV=4	HUMAN	42		P29279
136	13.05	13.05	62.31	50.75	50.75	sp|P37802|TAGL2_HUMAN	Transgelin-2 OS=Homo sapiens GN=TAGLN2 PE=1 SV=3	HUMAN	11		O95816
114	16.22	16.22	30.15	18.36	14.76	sp|P55072|TERA_HUMAN	Transitional endoplasmic reticulum ATPase OS=Homo sapiens GN=VCP PE=1 SV=4	HUMAN	9		H7BYY1
60	28.76	28.76	45.1	39.65	38.2	sp|P29401|TKT_HUMAN	Transketolase OS=Homo sapiens GN=TKT PE=1 SV=3	HUMAN	17		Q9BPX5
285	5.75	5.76	50	26.32	17.54	sp|Q15631|TSN_HUMAN	Translin OS=Homo sapiens GN=TSN PE=1 SV=1	HUMAN	3		P63000
620	1.61	1.61	26.94	13.7	9.132	sp|P49755|TMEDA_HUMAN	Transmembrane emp24 domain-containing protein 10 OS=Homo sapiens GN=TMED10 PE=1 SV=2	HUMAN	2		D6RE83
282	5.86	5.86	39.16	21.68	18.88	sp|P60174|TPIS_HUMAN	Triosephosphate isomerase OS=Homo sapiens GN=TPI1 PE=1 SV=3	HUMAN	5		P49755
478	2.42	2.45	24.72	11.65	11.65	sp|Q9NYL9|TMOD3_HUMAN	Tropomodulin-3 OS=Homo sapiens GN=TMOD3 PE=1 SV=1	HUMAN	2		P18077
603	1.73	21.09	76.21	54.44	36.69	tr|H7BYY1|H7BYY1_HUMAN	Tropomyosin 1 (Alpha), isoform CRA_m OS=Homo sapiens GN=TPM1 PE=1 SV=1	HUMAN	12		D6RAR4
243	6.81	35.14	69.01	51.41	45.42	sp|P09493|TPM1_HUMAN	Tropomyosin alpha-1 chain OS=Homo sapiens GN=TPM1 PE=1 SV=2	HUMAN	19		O14657
130	13.82	33.3	65.73	58.47	53.23	sp|P67936|TPM4_HUMAN	Tropomyosin alpha-4 chain OS=Homo sapiens GN=TPM4 PE=1 SV=3	HUMAN	18		P61106
45	36.31	36.31	66.55	48.94	47.89	tr|Q5TCU3|Q5TCU3_HUMAN	Tropomyosin beta chain OS=Homo sapiens GN=TPM2 PE=1 SV=1	HUMAN	19		I3L3P7
194	8.93	8.93	38.64	18.47	16.99	sp|P23381|SYWC_HUMAN	Tryptophan--tRNA ligase, cytoplasmic OS=Homo sapiens GN=WARS PE=1 SV=2	HUMAN	5		Q9H8S9
69	25.41	25.75	50.11	38.14	35.03	sp|Q71U36|TBA1A_HUMAN	Tubulin alpha-1A chain OS=Homo sapiens GN=TUBA1A PE=1 SV=1	HUMAN	14		O60493
543	2	25.75	50.11	38.14	35.03	sp|P68363|TBA1B_HUMAN	Tubulin alpha-1B chain OS=Homo sapiens GN=TUBA1B PE=1 SV=1	HUMAN	14		X6RLR1
51	32.79	32.79	55.4	55.4	54.23	tr|Q5JP53|Q5JP53_HUMAN	Tubulin beta chain OS=Homo sapiens GN=TUBB PE=1 SV=1	HUMAN	22		Q6PCB0
827	0.3	13.83	24.59	12.55	11.29	tr|A0A0B4J269|A0A0B4J269_HUMAN	Tubulin beta-3 chain OS=Homo sapiens GN=TUBB3 PE=4 SV=1	HUMAN	11		P21781
398	3.46	3.46	46.31	25.41	22.13	sp|Q99426|TBCB_HUMAN	Tubulin-folding cofactor B OS=Homo sapiens GN=TBCB PE=1 SV=2	HUMAN	4		P61163
200	8.48	8.49	57.98	47.06	31.93	tr|E5RJD8|E5RJD8_HUMAN	Tubulin-specific chaperone A OS=Homo sapiens GN=TBCA PE=1 SV=1	HUMAN	5		Q13561
349	4.28	4.28	27.18	16.96	7.731	sp|O00300|TR11B_HUMAN	Tumor necrosis factor receptor superfamily member 11B OS=Homo sapiens GN=TNFRSF11B PE=1 SV=3	HUMAN	3		P35625
470	2.53	2.53	13.06	10.81	10.81	tr|A0A087WYR3|A0A087WYR3_HUMAN	Tumor protein D54 OS=Homo sapiens GN=TPD52L2 PE=1 SV=1	HUMAN	2		Q15819
363	4.02	4.02	16.57	9.143	9.143	sp|Q12792|TWF1_HUMAN	Twinfilin-1 OS=Homo sapiens GN=TWF1 PE=1 SV=3	HUMAN	2		E5RI99
614	1.64	1.64	40.1	16.43	6.28	tr|D6RE83|D6RE83_HUMAN	Ubiquitin carboxyl-terminal hydrolase OS=Homo sapiens GN=UCHL1 PE=1 SV=1	HUMAN	2		P35754
468	2.55	2.55	9.598	4.688	4.688	tr|A6NJA2|A6NJA2_HUMAN	Ubiquitin carboxyl-terminal hydrolase OS=Homo sapiens GN=USP14 PE=1 SV=2	HUMAN	2		M0R1G9
288	5.62	5.63	69.53	46.09	31.25	sp|P62987|RL40_HUMAN	Ubiquitin-60S ribosomal protein L40 OS=Homo sapiens GN=UBA52 PE=1 SV=2	HUMAN	4		P20809
476	2.44	2.44	21.09	14.29	14.29	sp|P61077|UB2D3_HUMAN	Ubiquitin-conjugating enzyme E2 D3 OS=Homo sapiens GN=UBE2D3 PE=1 SV=1	HUMAN	2		H0YAR1
411	3.33	3.33	13.5	10.5	10.5	sp|P61086|UBE2K_HUMAN	Ubiquitin-conjugating enzyme E2 K OS=Homo sapiens GN=UBE2K PE=1 SV=3	HUMAN	2		P12259
197	8.67	8.67	61.22	30.61	25.85	sp|Q13404|UB2V1_HUMAN	Ubiquitin-conjugating enzyme E2 variant 1 OS=Homo sapiens GN=UBE2V1 PE=1 SV=2	HUMAN	5		J9JID7
683	0.97	1.77	49.66	22.76	13.1	sp|Q15819|UB2V2_HUMAN	Ubiquitin-conjugating enzyme E2 variant 2 OS=Homo sapiens GN=UBE2V2 PE=1 SV=4	HUMAN	2		P22307
436	2.98	3.01	19.85	4.159	2.457	sp|P22314|UBA1_HUMAN	Ubiquitin-like modifier-activating enzyme 1 OS=Homo sapiens GN=UBA1 PE=1 SV=3	HUMAN	2		Q16778
177	9.93	9.94	63.78	32.14	25.51	sp|P30085|KCY_HUMAN	UMP-CMP kinase OS=Homo sapiens GN=CMPK1 PE=1 SV=3	HUMAN	5		B8ZZZ0
434	3.04	3.04	24.28	24.28	19.08	sp|Q969H8|CS010_HUMAN	UPF0556 protein C19orf10 OS=Homo sapiens GN=C19orf10 PE=1 SV=1	HUMAN	3		F2Z2V0
357	4.09	4.09	39.38	17.18	10.02	sp|P49767|VEGFC_HUMAN	Vascular endothelial growth factor C OS=Homo sapiens GN=VEGFC PE=1 SV=1	HUMAN	3		Q15417
188	9.5	9.5	21.84	17.38	15.9	sp|Q6EMK4|VASN_HUMAN	Vasorin OS=Homo sapiens GN=VASN PE=1 SV=1	HUMAN	5		K7ERG9
304	5.14	5.14	9.536	2.321	2.321	tr|E9PF17|E9PF17_HUMAN	Versican core protein OS=Homo sapiens GN=VCAN PE=1 SV=2	HUMAN	3		Q9BTM1
18	65.9	67.95	88.84	81.55	76.39	sp|P08670|VIME_HUMAN	Vimentin OS=Homo sapiens GN=VIM PE=1 SV=4	HUMAN	47		A0A0B4J269
47	35.76	35.76	41.53	27.95	20.81	sp|P18206|VINC_HUMAN	Vinculin OS=Homo sapiens GN=VCL PE=1 SV=4	HUMAN	18		Q29963
477	2.43	2.67	11.3	5.649	3.138	sp|P04004|VTNC_HUMAN	Vitronectin OS=Homo sapiens GN=VTN PE=1 SV=1	HUMAN	2		G3XAP6
432	3.07	3.07	10.6	10.6	10.6	sp|P21796|VDAC1_HUMAN	Voltage-dependent anion-selective channel protein 1 OS=Homo sapiens GN=VDAC1 PE=1 SV=2	HUMAN	2		P20336
662	1.18	1.18	14.61	5.393	5.393	sp|Q6PCB0|VWA1_HUMAN	von Willebrand factor A domain-containing protein 1 OS=Homo sapiens GN=VWA1 PE=2 SV=1	HUMAN	2		Q7Z406
219	7.65	7.65	29.54	15.84	12.71	sp|O75083|WDR1_HUMAN	WD repeat-containing protein 1 OS=Homo sapiens GN=WDR1 PE=1 SV=4	HUMAN	5		P35241
204	8.29	8.29	19.81	8.863	8.863	sp|Q86Y38|XYLT1_HUMAN	Xylosyltransferase 1 OS=Homo sapiens GN=XYLT1 PE=1 SV=1	HUMAN	6		P12107
196	8.78	8.78	50	37.67	32.19	tr|A0A087WZ27|A0A087WZ27_HUMAN	Zinc finger protein 90 OS=Homo sapiens GN=ZNF90 PE=4 SV=1	HUMAN	6		P02452

## Sheet: BM MSC sample 150913
N	Unused	Total	%Cov	%Cov(50)	%Cov(95)	Accession	Name	Species	Peptides(95%)	Accession			Molecular Function	PANTHER ID
1	321.41	321.41	85.25	74.81	71.29	sp|P02751|FINC_HUMAN	Fibronectin OS=Homo sapiens GN=FN1 PE=1 SV=4	HUMAN	689	sp	P02751	FINC_HUMAN
2	277.96	277.96	61.32	53.92	50.68	sp|P12111|CO6A3_HUMAN	Collagen alpha-3(VI) chain OS=Homo sapiens GN=COL6A3 PE=1 SV=5	HUMAN	191	sp	P12111	CO6A3_HUMAN
3	262.4	262.4	62.05	57.18	50.78	tr|D6RGG3|D6RGG3_HUMAN	Collagen alpha-1(XII) chain OS=Homo sapiens GN=COL12A1 PE=1 SV=1	HUMAN	181	tr	D6RGG3	D6RGG3_HUMAN
4	204.53	204.99	93.12	85.87	83.97	sp|P08123|CO1A2_HUMAN	Collagen alpha-2(I) chain OS=Homo sapiens GN=COL1A2 PE=1 SV=7	HUMAN	365	sp	P08123	CO1A2_HUMAN
5	142.21	142.21	48.32	39.86	38.16	sp|P21333|FLNA_HUMAN	Filamin-A OS=Homo sapiens GN=FLNA PE=1 SV=4	HUMAN	80	sp	P21333	FLNA_HUMAN
6	118.75	121.45	75.68	67.14	60.25	sp|P02452|CO1A1_HUMAN	Collagen alpha-1(I) chain OS=Homo sapiens GN=COL1A1 PE=1 SV=5	HUMAN	304	sp	P02452	CO1A1_HUMAN
7	114.18	114.18	60.53	55.26	50.68	tr|A0A087X0S5|A0A087X0S5_HUMAN	Collagen alpha-1(VI) chain OS=Homo sapiens GN=COL6A1 PE=1 SV=1	HUMAN	99	tr	A0A087X0S5	A0A087X0S5_HUMAN
8	78.9	78.9	40.09	32.31	30.51	sp|P07996|TSP1_HUMAN	Thrombospondin-1 OS=Homo sapiens GN=THBS1 PE=1 SV=2	HUMAN	61	sp	P07996	TSP1_HUMAN
9	78.57	78.57	72.45	61.91	57.63	sp|O43707|ACTN4_HUMAN	Alpha-actinin-4 OS=Homo sapiens GN=ACTN4 PE=1 SV=2	HUMAN	56	sp	O43707	ACTN4_HUMAN
10	75.08	75.08	74.85	66.06	64.85	sp|P08253|MMP2_HUMAN	72 kDa type IV collagenase OS=Homo sapiens GN=MMP2 PE=1 SV=2	HUMAN	85	sp	P08253	MMP2_HUMAN
11	74.89	74.89	74.08	69.25	61.79	sp|Q15582|BGH3_HUMAN	Transforming growth factor-beta-induced protein ig-h3 OS=Homo sapiens GN=TGFBI PE=1 SV=1	HUMAN	79	sp	Q15582	BGH3_HUMAN
12	69.27	69.45	56.34	53.35	49.64	sp|Q15063|POSTN_HUMAN	Periostin OS=Homo sapiens GN=POSTN PE=1 SV=2	HUMAN	53	sp	Q15063	POSTN_HUMAN
13	68.67	68.67	55.73	49.12	38.45	sp|P18206|VINC_HUMAN	Vinculin OS=Homo sapiens GN=VCL PE=1 SV=4	HUMAN	36	sp	P18206	VINC_HUMAN
14	66.93	67.07	42.57	30.34	25.06	tr|A0A0A0MTC7|A0A0A0MTC7_HUMAN	Laminin subunit alpha-4 OS=Homo sapiens GN=LAMA4 PE=1 SV=1	HUMAN	38	tr	A0A0A0MTC7	A0A0A0MTC7_HUMAN
15	66.79	66.79	79.4	72.1	62.88	sp|P08670|VIME_HUMAN	Vimentin OS=Homo sapiens GN=VIM PE=1 SV=4	HUMAN	45	sp	P08670	VIME_HUMAN
16	65.62	65.62	55.05	39.16	37	sp|P12110|CO6A2_HUMAN	Collagen alpha-2(VI) chain OS=Homo sapiens GN=COL6A2 PE=1 SV=4	HUMAN	56	sp	P12110	CO6A2_HUMAN
17	64.51	64.51	33.76	23.09	18.78	tr|G3XAI2|G3XAI2_HUMAN	Laminin subunit beta-1 OS=Homo sapiens GN=LAMB1 PE=1 SV=1	HUMAN	36	tr	G3XAI2	G3XAI2_HUMAN
18	60.21	60.21	22.64	11.43	10.34	sp|P98160|PGBM_HUMAN	Basement membrane-specific heparan sulfate proteoglycan core protein OS=Homo sapiens GN=HSPG2 PE=1 SV=4	HUMAN	39	sp	P98160	PGBM_HUMAN
19	59.11	59.33	41.92	30.36	25.96	sp|Q92626|PXDN_HUMAN	Peroxidasin homolog OS=Homo sapiens GN=PXDN PE=1 SV=2	HUMAN	33	sp	Q92626	PXDN_HUMAN
20	58.67	72.08	33.9	23.56	19.98	sp|O75369|FLNB_HUMAN	Filamin-B OS=Homo sapiens GN=FLNB PE=1 SV=2	HUMAN	39	sp	O75369	FLNB_HUMAN
21	58.24	58.26	42.08	30.58	26.23	sp|P11047|LAMC1_HUMAN	Laminin subunit gamma-1 OS=Homo sapiens GN=LAMC1 PE=1 SV=3	HUMAN	35	sp	P11047	LAMC1_HUMAN
22	55.66	55.66	69.15	51.82	46.27	sp|P26038|MOES_HUMAN	Moesin OS=Homo sapiens GN=MSN PE=1 SV=3	HUMAN	32	sp	P26038	MOES_HUMAN
23	53.34	53.34	82.09	80.85	77.61	sp|P05121|PAI1_HUMAN	Plasminogen activator inhibitor 1 OS=Homo sapiens GN=SERPINE1 PE=1 SV=1	HUMAN	61	sp	P05121	PAI1_HUMAN
24	50.39	50.99	67.47	49.55	41.42	sp|P02545|LMNA_HUMAN	Prelamin-A/C OS=Homo sapiens GN=LMNA PE=1 SV=1	HUMAN	26	sp	P02545	LMNA_HUMAN
25	49.88	51.29	55.28	47.83	41.15	sp|P04264|K2C1_HUMAN	Keratin, type II cytoskeletal 1 OS=Homo sapiens GN=KRT1 PE=1 SV=6	HUMAN	31	sp	P04264	K2C1_HUMAN
26	48.41	48.41	43.2	23.61	20.18	sp|P20908|CO5A1_HUMAN	Collagen alpha-1(V) chain OS=Homo sapiens GN=COL5A1 PE=1 SV=3	HUMAN	39	sp	P20908	CO5A1_HUMAN
27	46.93	46.93	67.33	59.6	54.06	sp|P30101|PDIA3_HUMAN	Protein disulfide-isomerase A3 OS=Homo sapiens GN=PDIA3 PE=1 SV=4	HUMAN	26	sp	P30101	PDIA3_HUMAN
28	45.23	45.23	64.67	64.13	64.13	tr|J3KPS3|J3KPS3_HUMAN	Fructose-bisphosphate aldolase OS=Homo sapiens GN=ALDOA PE=1 SV=1	HUMAN	32	tr	J3KPS3	J3KPS3_HUMAN
29	44.56	44.56	68.44	59	52.8	sp|P07355|ANXA2_HUMAN	Annexin A2 OS=Homo sapiens GN=ANXA2 PE=1 SV=2	HUMAN	27	sp	P07355	ANXA2_HUMAN
30	44.35	59.95	29.36	18.57	14.53	sp|Q14315|FLNC_HUMAN	Filamin-C OS=Homo sapiens GN=FLNC PE=1 SV=3	HUMAN	32	sp	Q14315	FLNC_HUMAN
31	44.34	46.44	33.93	18.85	17.07	sp|P55268|LAMB2_HUMAN	Laminin subunit beta-2 OS=Homo sapiens GN=LAMB2 PE=1 SV=2	HUMAN	25	sp	P55268	LAMB2_HUMAN
32	43.23	43.69	66.59	54.84	53.46	sp|P06733|ENOA_HUMAN	Alpha-enolase OS=Homo sapiens GN=ENO1 PE=1 SV=2	HUMAN	31	sp	P06733	ENOA_HUMAN
33	43.16	43.23	64.4	48.61	39.63	sp|P11142|HSP7C_HUMAN	Heat shock cognate 71 kDa protein OS=Homo sapiens GN=HSPA8 PE=1 SV=1	HUMAN	24	sp	P11142	HSP7C_HUMAN
34	42.53	47.86	38.99	30.12	28.92	sp|P35442|TSP2_HUMAN	Thrombospondin-2 OS=Homo sapiens GN=THBS2 PE=1 SV=2	HUMAN	35	sp	P35442	TSP2_HUMAN
35	42.18	42.18	25.06	19.47	15.4	tr|J3QSU6|J3QSU6_HUMAN	Tenascin OS=Homo sapiens GN=TNC PE=1 SV=1	HUMAN	23	tr	J3QSU6	J3QSU6_HUMAN
36	40.83	41.35	32.65	22.73	16.72	sp|P01024|CO3_HUMAN	Complement C3 OS=Homo sapiens GN=C3 PE=1 SV=2	HUMAN	30	sp	P01024	CO3_HUMAN
37	39.94	40.39	56.68	30.9	23.6	sp|P02461|CO3A1_HUMAN	Collagen alpha-1(III) chain OS=Homo sapiens GN=COL3A1 PE=1 SV=4	HUMAN	49	sp	P02461	CO3A1_HUMAN
38	39.74	39.74	72.61	63.32	58.79	sp|P07093|GDN_HUMAN	Glia-derived nexin OS=Homo sapiens GN=SERPINE2 PE=1 SV=1	HUMAN	30	sp	P07093	GDN_HUMAN
39	39.39	39.39	70.78	66.57	63.25	sp|P00338|LDHA_HUMAN	L-lactate dehydrogenase A chain OS=Homo sapiens GN=LDHA PE=1 SV=2	HUMAN	36	sp	P00338	LDHA_HUMAN
40	38.95	38.95	44.2	41.3	34.39	sp|P08238|HS90B_HUMAN	Heat shock protein HSP 90-beta OS=Homo sapiens GN=HSP90AB1 PE=1 SV=4	HUMAN	23	sp	P08238	HS90B_HUMAN
41	38.87	38.87	74.6	64.52	61.29	sp|P67936|TPM4_HUMAN	Tropomyosin alpha-4 chain OS=Homo sapiens GN=TPM4 PE=1 SV=3	HUMAN	24	sp	P67936	TPM4_HUMAN
42	38.4	71.99	66.82	56.05	51.79	sp|P12814|ACTN1_HUMAN	Alpha-actinin-1 OS=Homo sapiens GN=ACTN1 PE=1 SV=2	HUMAN	52	sp	P12814	ACTN1_HUMAN
43	37.05	37.25	41.93	31	26.87	sp|Q9Y6C2|EMIL1_HUMAN	EMILIN-1 OS=Homo sapiens GN=EMILIN1 PE=1 SV=2	HUMAN	21	sp	Q9Y6C2	EMIL1_HUMAN
44	36.67	42.12	56.12	45.11	37.16	sp|P11021|GRP78_HUMAN	78 kDa glucose-regulated protein OS=Homo sapiens GN=HSPA5 PE=1 SV=2	HUMAN	24	sp	P11021	GRP78_HUMAN
45	36.55	36.55	44.58	37.08	30.12	sp|O00391|QSOX1_HUMAN	Sulfhydryl oxidase 1 OS=Homo sapiens GN=QSOX1 PE=1 SV=3	HUMAN	25	sp	O00391	QSOX1_HUMAN
46	36.42	36.42	62.9	50.66	39.36	sp|P14618|KPYM_HUMAN	Pyruvate kinase PKM OS=Homo sapiens GN=PKM PE=1 SV=4	HUMAN	23	sp	P14618	KPYM_HUMAN
47	35.87	35.87	67.47	64.53	60.53	sp|P63261|ACTG_HUMAN	Actin, cytoplasmic 2 OS=Homo sapiens GN=ACTG1 PE=1 SV=1	HUMAN	44	sp	P63261	ACTG_HUMAN
48	34.1	34.58	25.85	8.348	5.423	sp|Q15149|PLEC_HUMAN	Plectin OS=Homo sapiens GN=PLEC PE=1 SV=3	HUMAN	22	sp	Q15149	PLEC_HUMAN
49	33.4	33.47	55.99	45.03	39.55	sp|P13645|K1C10_HUMAN	Keratin, type I cytoskeletal 10 OS=Homo sapiens GN=KRT10 PE=1 SV=6	HUMAN	21	sp	P13645	K1C10_HUMAN
50	33.31	33.31	69.62	57.66	55.02	sp|P50454|SERPH_HUMAN	Serpin H1 OS=Homo sapiens GN=SERPINH1 PE=1 SV=2	HUMAN	19	sp	P50454	SERPH_HUMAN
51	33.18	33.18	43.71	29.6	24.94	sp|P13639|EF2_HUMAN	Elongation factor 2 OS=Homo sapiens GN=EEF2 PE=1 SV=4	HUMAN	19	sp	P13639	EF2_HUMAN
52	32.21	33.26	28.91	15.36	14.49	sp|P08572|CO4A2_HUMAN	Collagen alpha-2(IV) chain OS=Homo sapiens GN=COL4A2 PE=1 SV=4	HUMAN	19	sp	P08572	CO4A2_HUMAN
53	31.98	31.98	48.89	33.5	29.91	sp|Q08380|LG3BP_HUMAN	Galectin-3-binding protein OS=Homo sapiens GN=LGALS3BP PE=1 SV=1	HUMAN	21	sp	Q08380	LG3BP_HUMAN
54	30.79	30.79	69.09	49.61	41.93	sp|P07237|PDIA1_HUMAN	Protein disulfide-isomerase OS=Homo sapiens GN=P4HB PE=1 SV=3	HUMAN	17	sp	P07237	PDIA1_HUMAN
55	30.75	30.75	46.53	33.37	27.17	sp|P55072|TERA_HUMAN	Transitional endoplasmic reticulum ATPase OS=Homo sapiens GN=VCP PE=1 SV=4	HUMAN	16	sp	P55072	TERA_HUMAN
56	29.16	29.16	68.21	50.58	48.27	sp|P04083|ANXA1_HUMAN	Annexin A1 OS=Homo sapiens GN=ANXA1 PE=1 SV=2	HUMAN	18	sp	P04083	ANXA1_HUMAN
57	29.06	34.02	45.95	36.61	26.9	sp|P14625|ENPL_HUMAN	Endoplasmin OS=Homo sapiens GN=HSP90B1 PE=1 SV=1	HUMAN	19	sp	P14625	ENPL_HUMAN
58	28.81	28.81	55.23	50.33	41.43	sp|Q15113|PCOC1_HUMAN	Procollagen C-endopeptidase enhancer 1 OS=Homo sapiens GN=PCOLCE PE=1 SV=2	HUMAN	25	sp	Q15113	PCOC1_HUMAN
59	28.3	29.96	62.68	57.18	47.37	sp|P36955|PEDF_HUMAN	Pigment epithelium-derived factor OS=Homo sapiens GN=SERPINF1 PE=1 SV=4	HUMAN	17	sp	P36955	PEDF_HUMAN
60	28.22	28.22	72.28	58.43	53.93	sp|P01210|PENK_HUMAN	Proenkephalin-A OS=Homo sapiens GN=PENK PE=1 SV=1	HUMAN	19	sp	P01210	PENK_HUMAN
61	26.03	26.03	35.38	27.44	19.07	sp|Q14697|GANAB_HUMAN	Neutral alpha-glucosidase AB OS=Homo sapiens GN=GANAB PE=1 SV=3	HUMAN	14	sp	Q14697	GANAB_HUMAN
62	25.99	25.99	35.9	30.81	27.47	sp|P09871|C1S_HUMAN	Complement C1s subcomponent OS=Homo sapiens GN=C1S PE=1 SV=1	HUMAN	20	sp	P09871	C1S_HUMAN
63	25.96	26.1	49.5	20.95	14.81	sp|P05997|CO5A2_HUMAN	Collagen alpha-2(V) chain OS=Homo sapiens GN=COL5A2 PE=1 SV=3	HUMAN	20	sp	P05997	CO5A2_HUMAN
64	25.82	25.82	76.39	70.37	59.72	sp|P23284|PPIB_HUMAN	Peptidyl-prolyl cis-trans isomerase B OS=Homo sapiens GN=PPIB PE=1 SV=2	HUMAN	23	sp	P23284	PPIB_HUMAN
65	25.63	25.63	24.6	13.34	10.72	tr|A0A087WVQ6|A0A087WVQ6_HUMAN	Clathrin heavy chain OS=Homo sapiens GN=CLTC PE=1 SV=1	HUMAN	15	tr	A0A087WVQ6	A0A087WVQ6_HUMAN
66	25.52	25.55	48.48	37.08	34.83	sp|P29401|TKT_HUMAN	Transketolase OS=Homo sapiens GN=TKT PE=1 SV=3	HUMAN	16	sp	P29401	TKT_HUMAN
67	25.26	25.26	82.09	73.63	73.13	sp|Q01995|TAGL_HUMAN	Transgelin OS=Homo sapiens GN=TAGLN PE=1 SV=4	HUMAN	18	sp	Q01995	TAGL_HUMAN
68	24.59	24.66	65.18	60.45	51.81	sp|P07585|PGS2_HUMAN	Decorin OS=Homo sapiens GN=DCN PE=1 SV=1	HUMAN	24	sp	P07585	PGS2_HUMAN
69	24.48	24.48	39.5	27.25	21.64	tr|A0A0A0MT01|A0A0A0MT01_HUMAN	Gelsolin OS=Homo sapiens GN=GSN PE=1 SV=1	HUMAN	13	tr	A0A0A0MT01	A0A0A0MT01_HUMAN
70	24.32	25.85	53.29	48.31	39	sp|P35527|K1C9_HUMAN	Keratin, type I cytoskeletal 9 OS=Homo sapiens GN=KRT9 PE=1 SV=3	HUMAN	14	sp	P35527	K1C9_HUMAN
71	24.24	24.24	37.05	28	16.95	sp|Q76M96|CCD80_HUMAN	Coiled-coil domain-containing protein 80 OS=Homo sapiens GN=CCDC80 PE=1 SV=1	HUMAN	12	sp	Q76M96	CCD80_HUMAN
72	24.09	30.08	53.68	35.52	29.73	sp|P35908|K22E_HUMAN	Keratin, type II cytoskeletal 2 epidermal OS=Homo sapiens GN=KRT2 PE=1 SV=2	HUMAN	15	sp	P35908	K22E_HUMAN
73	23.76	23.76	46.4	32.8	27.6	sp|P05155|IC1_HUMAN	Plasma protease C1 inhibitor OS=Homo sapiens GN=SERPING1 PE=1 SV=2	HUMAN	16	sp	P05155	IC1_HUMAN
74	23.73	23.91	38.11	28.29	21.19	sp|Q9Y4K0|LOXL2_HUMAN	Lysyl oxidase homolog 2 OS=Homo sapiens GN=LOXL2 PE=1 SV=1	HUMAN	16	sp	Q9Y4K0	LOXL2_HUMAN
75	23.68	23.68	20.99	10.75	8.104	tr|G3V3X5|G3V3X5_HUMAN	Latent-transforming growth factor beta-binding protein 2 OS=Homo sapiens GN=LTBP2 PE=1 SV=1	HUMAN	14	tr	G3V3X5	G3V3X5_HUMAN
76	23.59	23.59	44.09	35.61	26.56	tr|B4DPQ0|B4DPQ0_HUMAN	Complement C1r subcomponent OS=Homo sapiens GN=C1R PE=1 SV=1	HUMAN	19	tr	B4DPQ0	B4DPQ0_HUMAN
77	23.06	23.06	57.45	52.84	47.87	sp|Q16270|IBP7_HUMAN	Insulin-like growth factor-binding protein 7 OS=Homo sapiens GN=IGFBP7 PE=1 SV=1	HUMAN	33	sp	Q16270	IBP7_HUMAN
78	22.72	22.72	29.05	19.67	16.11	sp|O94985|CSTN1_HUMAN	Calsyntenin-1 OS=Homo sapiens GN=CLSTN1 PE=1 SV=1	HUMAN	13	sp	O94985	CSTN1_HUMAN
79	22.67	22.83	48.1	38.59	31.52	sp|P21810|PGS1_HUMAN	Biglycan OS=Homo sapiens GN=BGN PE=1 SV=2	HUMAN	13	sp	P21810	PGS1_HUMAN
80	22.51	22.51	61.56	52.44	45.28	tr|F8W6I7|F8W6I7_HUMAN	Heterogeneous nuclear ribonucleoprotein A1 OS=Homo sapiens GN=HNRNPA1 PE=1 SV=2	HUMAN	12	tr	F8W6I7	F8W6I7_HUMAN
81	22.2	22.2	54.44	40.24	36.39	sp|P51884|LUM_HUMAN	Lumican OS=Homo sapiens GN=LUM PE=1 SV=2	HUMAN	18	sp	P51884	LUM_HUMAN
82	22.07	22.07	44.94	43.82	32.81	sp|P50395|GDIB_HUMAN	Rab GDP dissociation inhibitor beta OS=Homo sapiens GN=GDI2 PE=1 SV=2	HUMAN	12	sp	P50395	GDIB_HUMAN
83	21.77	22.04	44.74	29.43	25.08	sp|O75326|SEM7A_HUMAN	Semaphorin-7A OS=Homo sapiens GN=SEMA7A PE=1 SV=1	HUMAN	14	sp	O75326	SEM7A_HUMAN
84	21.53	21.53	53.99	44.37	41.55	tr|Q5JP53|Q5JP53_HUMAN	Tubulin beta chain OS=Homo sapiens GN=TUBB PE=1 SV=1	HUMAN	15	tr	Q5JP53	Q5JP53_HUMAN
85	21.21	21.21	19.44	14.71	11.99	sp|P53396|ACLY_HUMAN	ATP-citrate synthase OS=Homo sapiens GN=ACLY PE=1 SV=3	HUMAN	12	sp	P53396	ACLY_HUMAN
86	21.14	21.8	34.48	28.33	28.33	sp|Q9NRN5|OLFL3_HUMAN	Olfactomedin-like protein 3 OS=Homo sapiens GN=OLFML3 PE=2 SV=1	HUMAN	17	sp	Q9NRN5	OLFL3_HUMAN
87	20.34	20.44	35.07	30.64	28.13	tr|F5H5D3|F5H5D3_HUMAN	Tubulin alpha-1C chain OS=Homo sapiens GN=TUBA1C PE=1 SV=1	HUMAN	12	tr	F5H5D3	F5H5D3_HUMAN
88	19.63	19.67	40.43	19.67	15.6	sp|O00469|PLOD2_HUMAN	Procollagen-lysine,2-oxoglutarate 5-dioxygenase 2 OS=Homo sapiens GN=PLOD2 PE=1 SV=2	HUMAN	10	sp	O00469	PLOD2_HUMAN
89	19.17	19.48	42.95	31.45	26.03	sp|Q02818|NUCB1_HUMAN	Nucleobindin-1 OS=Homo sapiens GN=NUCB1 PE=1 SV=4	HUMAN	10	sp	Q02818	NUCB1_HUMAN
90	18.89	18.89	24.54	16.2	12.35	sp|P14543|NID1_HUMAN	Nidogen-1 OS=Homo sapiens GN=NID1 PE=1 SV=3	HUMAN	13	sp	P14543	NID1_HUMAN
91	18.81	18.81	60.91	49.4	33.81	sp|P00558|PGK1_HUMAN	Phosphoglycerate kinase 1 OS=Homo sapiens GN=PGK1 PE=1 SV=3	HUMAN	10	sp	P00558	PGK1_HUMAN
92	18.67	18.67	47.47	44.95	34.34	sp|P32119|PRDX2_HUMAN	Peroxiredoxin-2 OS=Homo sapiens GN=PRDX2 PE=1 SV=5	HUMAN	11	sp	P32119	PRDX2_HUMAN
93	18.53	19.38	51.44	43.86	38.64	sp|P36222|CH3L1_HUMAN	Chitinase-3-like protein 1 OS=Homo sapiens GN=CHI3L1 PE=1 SV=2	HUMAN	21	sp	P36222	CH3L1_HUMAN
94	18.02	20.1	52.69	46.71	37.43	sp|P07195|LDHB_HUMAN	L-lactate dehydrogenase B chain OS=Homo sapiens GN=LDHB PE=1 SV=2	HUMAN	13	sp	P07195	LDHB_HUMAN
95	17.94	17.94	80.71	74.29	60.71	sp|P07737|PROF1_HUMAN	Profilin-1 OS=Homo sapiens GN=PFN1 PE=1 SV=2	HUMAN	14	sp	P07737	PROF1_HUMAN
96	17.7	17.7	61.85	48.62	41.23	sp|Q96CX2|KCD12_HUMAN	BTB/POZ domain-containing protein KCTD12 OS=Homo sapiens GN=KCTD12 PE=1 SV=1	HUMAN	10	sp	Q96CX2	KCD12_HUMAN
97	17.51	17.51	64.57	57.87	55.91	sp|P18669|PGAM1_HUMAN	Phosphoglycerate mutase 1 OS=Homo sapiens GN=PGAM1 PE=1 SV=2	HUMAN	13	sp	P18669	PGAM1_HUMAN
98	17.23	17.23	28.17	18.24	12.48	sp|P22314|UBA1_HUMAN	Ubiquitin-like modifier-activating enzyme 1 OS=Homo sapiens GN=UBA1 PE=1 SV=3	HUMAN	9	sp	P22314	UBA1_HUMAN
99	16.98	16.98	43.64	32.95	27.5	sp|Q15084|PDIA6_HUMAN	Protein disulfide-isomerase A6 OS=Homo sapiens GN=PDIA6 PE=1 SV=1	HUMAN	9	sp	Q15084	PDIA6_HUMAN
100	16.57	16.61	44.43	23.66	16.92	sp|Q02809|PLOD1_HUMAN	Procollagen-lysine,2-oxoglutarate 5-dioxygenase 1 OS=Homo sapiens GN=PLOD1 PE=1 SV=2	HUMAN	9	sp	Q02809	PLOD1_HUMAN
101	16.32	16.32	48.61	33.75	29.1	tr|A0A0A6YY95|A0A0A6YY95_HUMAN	C-type lectin domain family 11 member A OS=Homo sapiens GN=CLEC11A PE=1 SV=1	HUMAN	11	tr	A0A0A6YY95	A0A0A6YY95_HUMAN
102	15.95	16.02	39.63	33.33	23.36	sp|P26022|PTX3_HUMAN	Pentraxin-related protein PTX3 OS=Homo sapiens GN=PTX3 PE=1 SV=3	HUMAN	12	sp	P26022	PTX3_HUMAN
103	15.88	15.97	19.65	11	8.166	sp|Q6YHK3|CD109_HUMAN	CD109 antigen OS=Homo sapiens GN=CD109 PE=1 SV=2	HUMAN	8	sp	Q6YHK3	CD109_HUMAN
104	15.87	15.87	34.1	25.4	20.37	sp|P26641|EF1G_HUMAN	Elongation factor 1-gamma OS=Homo sapiens GN=EEF1G PE=1 SV=3	HUMAN	9	sp	P26641	EF1G_HUMAN
105	15.35	17.53	56.78	52.26	52.26	sp|Q06830|PRDX1_HUMAN	Peroxiredoxin-1 OS=Homo sapiens GN=PRDX1 PE=1 SV=1	HUMAN	15	sp	Q06830	PRDX1_HUMAN
106	15.33	15.33	24.47	17.64	14.51	sp|P23142|FBLN1_HUMAN	Fibulin-1 OS=Homo sapiens GN=FBLN1 PE=1 SV=4	HUMAN	13	sp	P23142	FBLN1_HUMAN
107	15.18	15.18	77.04	54.07	54.07	sp|P09382|LEG1_HUMAN	Galectin-1 OS=Homo sapiens GN=LGALS1 PE=1 SV=2	HUMAN	15	sp	P09382	LEG1_HUMAN
108	15	15	36.67	26.25	24.38	sp|Q92743|HTRA1_HUMAN	Serine protease HTRA1 OS=Homo sapiens GN=HTRA1 PE=1 SV=1	HUMAN	8	sp	Q92743	HTRA1_HUMAN
109	14.87	14.87	47.88	38.53	26.73	sp|P10909|CLUS_HUMAN	Clusterin OS=Homo sapiens GN=CLU PE=1 SV=1	HUMAN	10	sp	P10909	CLUS_HUMAN
110	14.27	14.27	47.26	29.49	22.5	sp|P06576|ATPB_HUMAN	ATP synthase subunit beta, mitochondrial OS=Homo sapiens GN=ATP5B PE=1 SV=3	HUMAN	8	sp	P06576	ATPB_HUMAN
111	14.23	22.91	48.47	39.57	28.53	tr|Q6ZN40|Q6ZN40_HUMAN	Tropomyosin 1 (Alpha), isoform CRA_f OS=Homo sapiens GN=TPM1 PE=1 SV=1	HUMAN	13	tr	Q6ZN40	Q6ZN40_HUMAN
112	13.95	13.95	56.17	36.6	36.6	tr|J3QQX2|J3QQX2_HUMAN	Rho GDP-dissociation inhibitor 1 OS=Homo sapiens GN=ARHGDIA PE=1 SV=1	HUMAN	7	tr	J3QQX2	J3QQX2_HUMAN
113	13.94	13.94	34.67	27.53	23.52	sp|Q08397|LOXL1_HUMAN	Lysyl oxidase homolog 1 OS=Homo sapiens GN=LOXL1 PE=1 SV=2	HUMAN	8	sp	Q08397	LOXL1_HUMAN
114	13.67	13.67	68.49	59.25	51.37	tr|Q32Q12|Q32Q12_HUMAN	Nucleoside diphosphate kinase OS=Homo sapiens GN=NME1-NME2 PE=1 SV=1	HUMAN	11	tr	Q32Q12	Q32Q12_HUMAN
115	13.66	13.67	60.48	49.6	43.55	sp|O14818|PSA7_HUMAN	Proteasome subunit alpha type-7 OS=Homo sapiens GN=PSMA7 PE=1 SV=1	HUMAN	8	sp	O14818	PSA7_HUMAN
116	13.6	13.6	46.01	34.51	22.54	sp|P08476|INHBA_HUMAN	Inhibin beta A chain OS=Homo sapiens GN=INHBA PE=1 SV=2	HUMAN	8	sp	P08476	INHBA_HUMAN
117	13.35	20.69	47.88	45.04	43.63	sp|P22626|ROA2_HUMAN	Heterogeneous nuclear ribonucleoproteins A2/B1 OS=Homo sapiens GN=HNRNPA2B1 PE=1 SV=2	HUMAN	14	sp	P22626	ROA2_HUMAN
118	13.3	14.34	22.14	14.56	13.52	sp|Q6EMK4|VASN_HUMAN	Vasorin OS=Homo sapiens GN=VASN PE=1 SV=1	HUMAN	8	sp	Q6EMK4	VASN_HUMAN
119	13.18	35.88	41.67	29.64	27.46	sp|P07900|HS90A_HUMAN	Heat shock protein HSP 90-alpha OS=Homo sapiens GN=HSP90AA1 PE=1 SV=5	HUMAN	20	sp	P07900	HS90A_HUMAN
120	13.06	13.06	41.13	31.17	22.94	sp|P68104|EF1A1_HUMAN	Elongation factor 1-alpha 1 OS=Homo sapiens GN=EEF1A1 PE=1 SV=1	HUMAN	11	sp	P68104	EF1A1_HUMAN
121	13.01	13.02	20.34	8.087	5.733	sp|P46940|IQGA1_HUMAN	Ras GTPase-activating-like protein IQGAP1 OS=Homo sapiens GN=IQGAP1 PE=1 SV=1	HUMAN	7	sp	P46940	IQGA1_HUMAN
122	12.8	12.8	42.23	36.17	25.49	sp|P07339|CATD_HUMAN	Cathepsin D OS=Homo sapiens GN=CTSD PE=1 SV=1	HUMAN	8	sp	P07339	CATD_HUMAN
123	12.8	12.8	32.27	22.27	19.55	sp|P16035|TIMP2_HUMAN	Metalloproteinase inhibitor 2 OS=Homo sapiens GN=TIMP2 PE=1 SV=2	HUMAN	7	sp	P16035	TIMP2_HUMAN
124	12.74	12.74	21.22	7.286	6.547	sp|Q4ZHG4|FNDC1_HUMAN	Fibronectin type III domain-containing protein 1 OS=Homo sapiens GN=FNDC1 PE=1 SV=4	HUMAN	9	sp	Q4ZHG4	FNDC1_HUMAN
125	12.69	12.69	26.16	12.2	9.307	sp|P15144|AMPN_HUMAN	Aminopeptidase N OS=Homo sapiens GN=ANPEP PE=1 SV=4	HUMAN	7	sp	P15144	AMPN_HUMAN
126	12.68	12.68	16.01	11.53	7.938	sp|P01023|A2MG_HUMAN	Alpha-2-macroglobulin OS=Homo sapiens GN=A2M PE=1 SV=3	HUMAN	15	sp	P01023	A2MG_HUMAN
127	12.59	12.59	16.2	7.315	4.215	sp|P35555|FBN1_HUMAN	Fibrillin-1 OS=Homo sapiens GN=FBN1 PE=1 SV=3	HUMAN	11	sp	P35555	FBN1_HUMAN
128	12.28	12.29	19.04	7.741	6.477	tr|B4E1Z4|B4E1Z4_HUMAN	Uncharacterized protein OS=Homo sapiens PE=2 SV=1	HUMAN	7	tr	B4E1Z4	B4E1Z4_HUMAN
129	12.14	12.14	67.33	40	36.33	sp|O15144|ARPC2_HUMAN	Actin-related protein 2/3 complex subunit 2 OS=Homo sapiens GN=ARPC2 PE=1 SV=1	HUMAN	8	sp	O15144	ARPC2_HUMAN
130	11.73	11.73	33.67	22.72	21.5	sp|Q12805|FBLN3_HUMAN	EGF-containing fibulin-like extracellular matrix protein 1 OS=Homo sapiens GN=EFEMP1 PE=1 SV=2	HUMAN	15	sp	Q12805	FBLN3_HUMAN
131	11.67	11.67	58.57	56.19	43.81	sp|P09211|GSTP1_HUMAN	Glutathione S-transferase P OS=Homo sapiens GN=GSTP1 PE=1 SV=2	HUMAN	8	sp	P09211	GSTP1_HUMAN
132	11.61	19.12	36.97	23.4	20.28	sp|P08107|HSP71_HUMAN	Heat shock 70 kDa protein 1A/1B OS=Homo sapiens GN=HSPA1A PE=1 SV=5	HUMAN	11	sp	P08107	HSP71_HUMAN
133	11.59	11.59	85.37	57.91	37.31	sp|P04406|G3P_HUMAN	Glyceraldehyde-3-phosphate dehydrogenase OS=Homo sapiens GN=GAPDH PE=1 SV=3	HUMAN	12	sp	P04406	G3P_HUMAN
134	11.54	11.66	39.74	17.08	14.45	sp|P02768|ALBU_HUMAN	Serum albumin OS=Homo sapiens GN=ALB PE=1 SV=2	HUMAN	18	sp	P02768	ALBU_HUMAN
135	11.39	11.39	49.01	34.48	24.14	sp|P60842|IF4A1_HUMAN	Eukaryotic initiation factor 4A-I OS=Homo sapiens GN=EIF4A1 PE=1 SV=1	HUMAN	7	sp	P60842	IF4A1_HUMAN
136	11.34	11.34	75.85	75.85	53.14	sp|P01033|TIMP1_HUMAN	Metalloproteinase inhibitor 1 OS=Homo sapiens GN=TIMP1 PE=1 SV=1	HUMAN	26	sp	P01033	TIMP1_HUMAN
137	11.1	11.1	49.7	34.91	26.63	sp|P40926|MDHM_HUMAN	Malate dehydrogenase, mitochondrial OS=Homo sapiens GN=MDH2 PE=1 SV=3	HUMAN	6	sp	P40926	MDHM_HUMAN
138	11.06	11.06	36.83	25.71	18.73	tr|D3DQH8|D3DQH8_HUMAN	SPARC OS=Homo sapiens GN=SPARC PE=1 SV=1	HUMAN	8	tr	D3DQH8	D3DQH8_HUMAN
139	10.97	10.97	27.93	19.19	14.29	sp|P03956|MMP1_HUMAN	Interstitial collagenase OS=Homo sapiens GN=MMP1 PE=1 SV=3	HUMAN	6	sp	P03956	MMP1_HUMAN
140	10.83	10.83	49.26	27.6	17.21	sp|P37837|TALDO_HUMAN	Transaldolase OS=Homo sapiens GN=TALDO1 PE=1 SV=2	HUMAN	6	sp	P37837	TALDO_HUMAN
141	10.8	10.8	67.41	44.64	30.36	sp|P30041|PRDX6_HUMAN	Peroxiredoxin-6 OS=Homo sapiens GN=PRDX6 PE=1 SV=3	HUMAN	6	sp	P30041	PRDX6_HUMAN
142	10.79	10.79	45.85	44.88	37.07	sp|P04792|HSPB1_HUMAN	Heat shock protein beta-1 OS=Homo sapiens GN=HSPB1 PE=1 SV=2	HUMAN	7	sp	P04792	HSPB1_HUMAN
143	10.71	10.71	31.56	26.25	21.83	sp|P07858|CATB_HUMAN	Cathepsin B OS=Homo sapiens GN=CTSB PE=1 SV=3	HUMAN	7	sp	P07858	CATB_HUMAN
144	10.5	10.5	61.96	47.45	32.16	sp|P62258|1433E_HUMAN	14-3-3 protein epsilon OS=Homo sapiens GN=YWHAE PE=1 SV=1	HUMAN	7	sp	P62258	1433E_HUMAN
145	10.47	10.47	67.16	54.9	45.59	tr|E9PK25|E9PK25_HUMAN	Cofilin-1 OS=Homo sapiens GN=CFL1 PE=1 SV=1	HUMAN	8	tr	E9PK25	E9PK25_HUMAN
146	10.38	10.86	39.57	30.46	21.1	sp|P28300|LYOX_HUMAN	Protein-lysine 6-oxidase OS=Homo sapiens GN=LOX PE=1 SV=2	HUMAN	7	sp	P28300	LYOX_HUMAN
147	10.35	10.35	51.16	31.01	29.84	sp|P22692|IBP4_HUMAN	Insulin-like growth factor-binding protein 4 OS=Homo sapiens GN=IGFBP4 PE=1 SV=2	HUMAN	24	sp	P22692	IBP4_HUMAN
148	10.3	10.91	25.11	7.877	7.877	sp|Q14974|IMB1_HUMAN	Importin subunit beta-1 OS=Homo sapiens GN=KPNB1 PE=1 SV=2	HUMAN	6	sp	Q14974	IMB1_HUMAN
149	10.15	10.15	28.4	15.21	13.18	sp|Q16658|FSCN1_HUMAN	Fascin OS=Homo sapiens GN=FSCN1 PE=1 SV=3	HUMAN	6	sp	Q16658	FSCN1_HUMAN
150	10.13	10.13	49.57	40.6	29.49	sp|P25787|PSA2_HUMAN	Proteasome subunit alpha type-2 OS=Homo sapiens GN=PSMA2 PE=1 SV=2	HUMAN	6	sp	P25787	PSA2_HUMAN
151	10.1	12.17	66.67	43.03	43.03	sp|P62937|PPIA_HUMAN	Peptidyl-prolyl cis-trans isomerase A OS=Homo sapiens GN=PPIA PE=1 SV=2	HUMAN	9	sp	P62937	PPIA_HUMAN
152	10.07	10.53	28.01	17.19	12.58	sp|P19320|VCAM1_HUMAN	Vascular cell adhesion protein 1 OS=Homo sapiens GN=VCAM1 PE=1 SV=1	HUMAN	7	sp	P19320	VCAM1_HUMAN
153	10.06	10.06	34.7	23.49	17.24	sp|P01008|ANT3_HUMAN	Antithrombin-III OS=Homo sapiens GN=SERPINC1 PE=1 SV=1	HUMAN	9	sp	P01008	ANT3_HUMAN
154	9.99	10.52	37.83	20.16	12.87	sp|P13667|PDIA4_HUMAN	Protein disulfide-isomerase A4 OS=Homo sapiens GN=PDIA4 PE=1 SV=2	HUMAN	7	sp	P13667	PDIA4_HUMAN
155	9.94	9.94	25.58	18.03	14.68	sp|P08254|MMP3_HUMAN	Stromelysin-1 OS=Homo sapiens GN=MMP3 PE=1 SV=2	HUMAN	6	sp	P08254	MMP3_HUMAN
156	9.92	10.44	17.29	16.12	14.95	sp|O14498|ISLR_HUMAN	Immunoglobulin superfamily containing leucine-rich repeat protein OS=Homo sapiens GN=ISLR PE=1 SV=1	HUMAN	8	sp	O14498	ISLR_HUMAN
157	9.73	9.73	53.25	40.72	17.83	sp|P05120|PAI2_HUMAN	Plasminogen activator inhibitor 2 OS=Homo sapiens GN=SERPINB2 PE=1 SV=2	HUMAN	8	sp	P05120	PAI2_HUMAN
158	9.71	9.83	24.81	16.85	14.26	sp|Q16610|ECM1_HUMAN	Extracellular matrix protein 1 OS=Homo sapiens GN=ECM1 PE=1 SV=2	HUMAN	6	sp	Q16610	ECM1_HUMAN
159	9.7	9.7	31.35	28.57	28.57	tr|G3V5Z7|G3V5Z7_HUMAN	Proteasome subunit alpha type OS=Homo sapiens GN=PSMA6 PE=1 SV=1	HUMAN	6	tr	G3V5Z7	G3V5Z7_HUMAN
160	9.53	9.53	36.13	16.97	9.854	sp|P50990|TCPQ_HUMAN	T-complex protein 1 subunit theta OS=Homo sapiens GN=CCT8 PE=1 SV=4	HUMAN	5	sp	P50990	TCPQ_HUMAN
161	9.52	9.52	47.9	40.56	28.67	sp|P60174|TPIS_HUMAN	Triosephosphate isomerase OS=Homo sapiens GN=TPI1 PE=1 SV=3	HUMAN	7	sp	P60174	TPIS_HUMAN
162	9.47	9.47	48.4	25.36	25.36	tr|F5GZN3|F5GZN3_HUMAN	Lactadherin OS=Homo sapiens GN=MFGE8 PE=1 SV=1	HUMAN	7	tr	F5GZN3	F5GZN3_HUMAN
163	9.4	9.4	14.34	7.858	6.218	sp|Q8IUX7|AEBP1_HUMAN	Adipocyte enhancer-binding protein 1 OS=Homo sapiens GN=AEBP1 PE=1 SV=1	HUMAN	6	sp	Q8IUX7	AEBP1_HUMAN
164	9.38	14.89	42.44	35.42	31	sp|Q13162|PRDX4_HUMAN	Peroxiredoxin-4 OS=Homo sapiens GN=PRDX4 PE=1 SV=1	HUMAN	9	sp	Q13162	PRDX4_HUMAN
165	9.32	9.32	24.53	10.56	7.311	sp|P08603|CFAH_HUMAN	Complement factor H OS=Homo sapiens GN=CFH PE=1 SV=4	HUMAN	9	sp	P08603	CFAH_HUMAN
166	9.14	9.14	21.16	13.33	8.511	sp|Q14764|MVP_HUMAN	Major vault protein OS=Homo sapiens GN=MVP PE=1 SV=4	HUMAN	5	sp	Q14764	MVP_HUMAN
167	9.09	9.09	34.25	34.25	30.14	sp|P01034|CYTC_HUMAN	Cystatin-C OS=Homo sapiens GN=CST3 PE=1 SV=1	HUMAN	8	sp	P01034	CYTC_HUMAN
168	9.03	9.03	10.13	5.571	3.658	tr|D3YTG3|D3YTG3_HUMAN	Target of Nesh-SH3 OS=Homo sapiens GN=ABI3BP PE=1 SV=1	HUMAN	5	tr	D3YTG3	D3YTG3_HUMAN
169	8.96	8.96	31.41	26.88	20.1	sp|P15291|B4GT1_HUMAN	Beta-1,4-galactosyltransferase 1 OS=Homo sapiens GN=B4GALT1 PE=1 SV=5	HUMAN	6	sp	P15291	B4GT1_HUMAN
170	8.87	8.87	47.15	27.76	23.57	sp|P28074|PSB5_HUMAN	Proteasome subunit beta type-5 OS=Homo sapiens GN=PSMB5 PE=1 SV=3	HUMAN	5	sp	P28074	PSB5_HUMAN
171	8.81	8.88	42.21	31.56	27.76	sp|P25786|PSA1_HUMAN	Proteasome subunit alpha type-1 OS=Homo sapiens GN=PSMA1 PE=1 SV=1	HUMAN	7	sp	P25786	PSA1_HUMAN
172	8.8	8.8	28.75	18.96	18.96	sp|O43854|EDIL3_HUMAN	EGF-like repeat and discoidin I-like domain-containing protein 3 OS=Homo sapiens GN=EDIL3 PE=1 SV=1	HUMAN	8	sp	O43854	EDIL3_HUMAN
173	8.73	9.96	51.55	44.33	42.61	sp|P17936|IBP3_HUMAN	Insulin-like growth factor-binding protein 3 OS=Homo sapiens GN=IGFBP3 PE=1 SV=2	HUMAN	15	sp	P17936	IBP3_HUMAN
174	8.63	8.63	22.52	13.59	4.26	sp|P13497|BMP1_HUMAN	Bone morphogenetic protein 1 OS=Homo sapiens GN=BMP1 PE=1 SV=2	HUMAN	4	sp	P13497	BMP1_HUMAN
175	8.58	8.68	24.09	5.992	4.853	sp|P02462|CO4A1_HUMAN	Collagen alpha-1(IV) chain OS=Homo sapiens GN=COL4A1 PE=1 SV=3	HUMAN	5	sp	P02462	CO4A1_HUMAN
176	8.53	8.55	17.32	4.762	3.188	sp|Q9Y490|TLN1_HUMAN	Talin-1 OS=Homo sapiens GN=TLN1 PE=1 SV=3	HUMAN	5	sp	Q9Y490	TLN1_HUMAN
177	8.5	8.55	29.25	17.42	7.742	sp|O60687|SRPX2_HUMAN	Sushi repeat-containing protein SRPX2 OS=Homo sapiens GN=SRPX2 PE=1 SV=1	HUMAN	4	sp	O60687	SRPX2_HUMAN
178	8.33	8.33	42.32	31.12	25.73	sp|P28066|PSA5_HUMAN	Proteasome subunit alpha type-5 OS=Homo sapiens GN=PSMA5 PE=1 SV=3	HUMAN	5	sp	P28066	PSA5_HUMAN
179	8.28	8.34	37.91	22.22	15.03	tr|C9J813|C9J813_HUMAN	Caldesmon (Fragment) OS=Homo sapiens GN=CALD1 PE=1 SV=1	HUMAN	6	tr	C9J813	C9J813_HUMAN
180	8.25	8.28	28.78	18.01	12.01	sp|P52209|6PGD_HUMAN	6-phosphogluconate dehydrogenase, decarboxylating OS=Homo sapiens GN=PGD PE=1 SV=3	HUMAN	4	sp	P52209	6PGD_HUMAN
181	8.2	8.2	55.19	39.83	35.68	sp|P20618|PSB1_HUMAN	Proteasome subunit beta type-1 OS=Homo sapiens GN=PSMB1 PE=1 SV=2	HUMAN	6	sp	P20618	PSB1_HUMAN
182	8.18	8.23	42.21	23.05	17.21	sp|Q12841|FSTL1_HUMAN	Follistatin-related protein 1 OS=Homo sapiens GN=FSTL1 PE=1 SV=1	HUMAN	6	sp	Q12841	FSTL1_HUMAN
183	8.09	8.52	38.11	27.13	20.73	sp|Q96D15|RCN3_HUMAN	Reticulocalbin-3 OS=Homo sapiens GN=RCN3 PE=1 SV=1	HUMAN	5	sp	Q96D15	RCN3_HUMAN
184	8	11.7	19.42	15.67	12.62	tr|B1AHL2|B1AHL2_HUMAN	Fibulin-1 OS=Homo sapiens GN=FBLN1 PE=1 SV=1	HUMAN	6	tr	B1AHL2	B1AHL2_HUMAN
185	7.98	7.98	22.22	11.9	10	sp|P13797|PLST_HUMAN	Plastin-3 OS=Homo sapiens GN=PLS3 PE=1 SV=4	HUMAN	5	sp	P13797	PLST_HUMAN
186	7.97	7.97	50.42	32.35	28.99	tr|B7Z6Z4|B7Z6Z4_HUMAN	Myosin light polypeptide 6 OS=Homo sapiens GN=MYL6 PE=1 SV=1	HUMAN	5	tr	B7Z6Z4	B7Z6Z4_HUMAN
187	7.91	7.91	31.64	12.6	8.602	tr|A0A087WSY9|A0A087WSY9_HUMAN	Thioredoxin reductase 1, cytoplasmic OS=Homo sapiens GN=TXNRD1 PE=1 SV=1	HUMAN	4	tr	A0A087WSY9	A0A087WSY9_HUMAN
188	7.82	7.82	43.52	25.69	17.59	sp|Q8NBS9|TXND5_HUMAN	Thioredoxin domain-containing protein 5 OS=Homo sapiens GN=TXNDC5 PE=1 SV=2	HUMAN	5	sp	Q8NBS9	TXND5_HUMAN
189	7.79	7.79	46.24	32.26	32.26	tr|I3L504|I3L504_HUMAN	Eukaryotic translation initiation factor 5A-1 OS=Homo sapiens GN=EIF5A PE=1 SV=1	HUMAN	7	tr	I3L504	I3L504_HUMAN
190	7.78	7.79	23.14	14.61	9.608	sp|P41250|SYG_HUMAN	Glycine--tRNA ligase OS=Homo sapiens GN=GARS PE=1 SV=3	HUMAN	5	sp	P41250	SYG_HUMAN
191	7.76	7.76	46.52	37.97	33.69	sp|P30086|PEBP1_HUMAN	Phosphatidylethanolamine-binding protein 1 OS=Homo sapiens GN=PEBP1 PE=1 SV=3	HUMAN	5	sp	P30086	PEBP1_HUMAN
192	7.7	7.7	28.18	13.75	8.591	sp|Q96AY3|FKB10_HUMAN	Peptidyl-prolyl cis-trans isomerase FKBP10 OS=Homo sapiens GN=FKBP10 PE=1 SV=1	HUMAN	6	sp	Q96AY3	FKB10_HUMAN
193	7.55	7.88	42.46	14.77	12.31	sp|P18065|IBP2_HUMAN	Insulin-like growth factor-binding protein 2 OS=Homo sapiens GN=IGFBP2 PE=1 SV=2	HUMAN	5	sp	P18065	IBP2_HUMAN
194	7.54	7.54	25.29	18.97	16.95	sp|P40121|CAPG_HUMAN	Macrophage-capping protein OS=Homo sapiens GN=CAPG PE=1 SV=2	HUMAN	6	sp	P40121	CAPG_HUMAN
195	7.42	7.42	40.45	31.46	18.26	sp|Q15365|PCBP1_HUMAN	Poly(rC)-binding protein 1 OS=Homo sapiens GN=PCBP1 PE=1 SV=2	HUMAN	4	sp	Q15365	PCBP1_HUMAN
196	7.32	7.32	39.47	33.16	29.47	sp|P41222|PTGDS_HUMAN	Prostaglandin-H2 D-isomerase OS=Homo sapiens GN=PTGDS PE=1 SV=1	HUMAN	4	sp	P41222	PTGDS_HUMAN
197	7.24	7.24	21.06	7.609	6.522	sp|Q32P28|P3H1_HUMAN	Prolyl 3-hydroxylase 1 OS=Homo sapiens GN=LEPRE1 PE=1 SV=2	HUMAN	4	sp	Q32P28	P3H1_HUMAN
198	7.21	7.21	39.95	23.68	19.62	sp|P61158|ARP3_HUMAN	Actin-related protein 3 OS=Homo sapiens GN=ACTR3 PE=1 SV=3	HUMAN	5	sp	P61158	ARP3_HUMAN
199	7.16	7.17	13.96	6.16	4.997	sp|Q92859|NEO1_HUMAN	Neogenin OS=Homo sapiens GN=NEO1 PE=1 SV=2	HUMAN	5	sp	Q92859	NEO1_HUMAN
200	7.15	7.16	18.39	11.99	9.524	sp|P02771|FETA_HUMAN	Alpha-fetoprotein OS=Homo sapiens GN=AFP PE=1 SV=1	HUMAN	5	sp	P02771	FETA_HUMAN
201	7.15	7.16	12.51	9.307	9.307	sp|Q9UHI8|ATS1_HUMAN	A disintegrin and metalloproteinase with thrombospondin motifs 1 OS=Homo sapiens GN=ADAMTS1 PE=1 SV=4	HUMAN	5	sp	Q9UHI8	ATS1_HUMAN
202	7.12	7.47	27.51	18.29	10.03	sp|O60568|PLOD3_HUMAN	Procollagen-lysine,2-oxoglutarate 5-dioxygenase 3 OS=Homo sapiens GN=PLOD3 PE=1 SV=1	HUMAN	5	sp	O60568	PLOD3_HUMAN
203	7.02	7.02	32.52	23.71	16.41	sp|Q14914|PTGR1_HUMAN	Prostaglandin reductase 1 OS=Homo sapiens GN=PTGR1 PE=1 SV=2	HUMAN	4	sp	Q14914	PTGR1_HUMAN
204	6.91	6.91	22.02	8.333	6.19	sp|P34932|HSP74_HUMAN	Heat shock 70 kDa protein 4 OS=Homo sapiens GN=HSPA4 PE=1 SV=4	HUMAN	5	sp	P34932	HSP74_HUMAN
205	6.88	6.88	40.82	26.53	22.11	sp|P06748|NPM_HUMAN	Nucleophosmin OS=Homo sapiens GN=NPM1 PE=1 SV=2	HUMAN	4	sp	P06748	NPM_HUMAN
206	6.87	6.87	26.34	8.169	6.761	sp|P19338|NUCL_HUMAN	Nucleolin OS=Homo sapiens GN=NCL PE=1 SV=3	HUMAN	4	sp	P19338	NUCL_HUMAN
207	6.87	6.87	35.93	17.07	11.38	sp|P40925|MDHC_HUMAN	Malate dehydrogenase, cytoplasmic OS=Homo sapiens GN=MDH1 PE=1 SV=4	HUMAN	3	sp	P40925	MDHC_HUMAN
208	6.83	6.83	62.43	55.56	43.92	sp|Q99497|PARK7_HUMAN	Protein deglycase DJ-1 OS=Homo sapiens GN=PARK7 PE=1 SV=2	HUMAN	10	sp	Q99497	PARK7_HUMAN
209	6.83	6.83	24.01	14.78	14.78	tr|Q5T6W2|Q5T6W2_HUMAN	Heterogeneous nuclear ribonucleoprotein K (Fragment) OS=Homo sapiens GN=HNRNPK PE=1 SV=1	HUMAN	4	tr	Q5T6W2	Q5T6W2_HUMAN
210	6.82	7.65	13.18	6.409	5.171	tr|A0A0A0MTL9|A0A0A0MTL9_HUMAN	Nidogen-2 OS=Homo sapiens GN=NID2 PE=1 SV=1	HUMAN	5	tr	A0A0A0MTL9	A0A0A0MTL9_HUMAN
211	6.8	6.8	34.17	15.6	8.424	tr|E7EX60|E7EX60_HUMAN	Neuropilin-1 OS=Homo sapiens GN=NRP1 PE=1 SV=1	HUMAN	4	tr	E7EX60	E7EX60_HUMAN
212	6.78	6.78	50.31	38.75	14.06	sp|P08758|ANXA5_HUMAN	Annexin A5 OS=Homo sapiens GN=ANXA5 PE=1 SV=2	HUMAN	4	sp	P08758	ANXA5_HUMAN
213	6.77	6.78	46.51	24.25	21.93	tr|B1AK88|B1AK88_HUMAN	Capping protein (Actin filament) muscle Z-line, beta, isoform CRA_d OS=Homo sapiens GN=CAPZB PE=1 SV=1	HUMAN	5	tr	B1AK88	B1AK88_HUMAN
214	6.72	6.72	42.59	34.22	30.04	tr|G3V3M6|G3V3M6_HUMAN	DNA-(apurinic or apyrimidinic site) lyase (Fragment) OS=Homo sapiens GN=APEX1 PE=1 SV=1	HUMAN	7	tr	G3V3M6	G3V3M6_HUMAN
215	6.7	6.74	55.8	37.57	25.41	tr|F8WCF6|F8WCF6_HUMAN	Protein ARPC4-TTLL3 OS=Homo sapiens GN=ARPC4-TTLL3 PE=1 SV=1	HUMAN	5	tr	F8WCF6	F8WCF6_HUMAN
216	6.69	6.69	19.48	17.81	12.83	sp|Q9UI42|CBPA4_HUMAN	Carboxypeptidase A4 OS=Homo sapiens GN=CPA4 PE=1 SV=2	HUMAN	3	sp	Q9UI42	CBPA4_HUMAN
217	6.6	6.6	59.18	37.41	30.61	sp|Q13404|UB2V1_HUMAN	Ubiquitin-conjugating enzyme E2 variant 1 OS=Homo sapiens GN=UBE2V1 PE=1 SV=2	HUMAN	5	sp	Q13404	UB2V1_HUMAN
218	6.49	6.49	27.95	18.63	16.99	sp|P30447|1A23_HUMAN	HLA class I histocompatibility antigen, A-23 alpha chain OS=Homo sapiens GN=HLA-A PE=1 SV=1	HUMAN	4	sp	P30447	1A23_HUMAN
219	6.4	6.4	63.81	56.19	37.14	sp|P31949|S10AB_HUMAN	Protein S100-A11 OS=Homo sapiens GN=S100A11 PE=1 SV=2	HUMAN	5	sp	P31949	S10AB_HUMAN
220	6.39	6.4	16.67	2.387	2.144	sp|Q13813|SPTN1_HUMAN	Spectrin alpha chain, non-erythrocytic 1 OS=Homo sapiens GN=SPTAN1 PE=1 SV=3	HUMAN	3	sp	Q13813	SPTN1_HUMAN
221	6.33	6.33	43.68	21.84	17.24	sp|P30040|ERP29_HUMAN	Endoplasmic reticulum resident protein 29 OS=Homo sapiens GN=ERP29 PE=1 SV=4	HUMAN	4	sp	P30040	ERP29_HUMAN
222	6.28	6.28	47.62	28.57	22.75	tr|B5MCZ3|B5MCZ3_HUMAN	Interleukin-6 OS=Homo sapiens GN=IL6 PE=1 SV=1	HUMAN	4	tr	B5MCZ3	B5MCZ3_HUMAN
223	6.26	6.26	71.36	47.24	35.68	sp|P37802|TAGL2_HUMAN	Transgelin-2 OS=Homo sapiens GN=TAGLN2 PE=1 SV=3	HUMAN	7	sp	P37802	TAGL2_HUMAN
224	6.19	6.23	57.89	48.03	32.24	sp|P61088|UBE2N_HUMAN	Ubiquitin-conjugating enzyme E2 N OS=Homo sapiens GN=UBE2N PE=1 SV=1	HUMAN	4	sp	P61088	UBE2N_HUMAN
225	6.18	6.19	64.36	40.59	33.66	tr|C9JFR7|C9JFR7_HUMAN	Cytochrome c (Fragment) OS=Homo sapiens GN=CYCS PE=1 SV=1	HUMAN	4	tr	C9JFR7	C9JFR7_HUMAN
226	6.12	6.12	35.73	32.13	12.47	sp|Q16769|QPCT_HUMAN	Glutaminyl-peptide cyclotransferase OS=Homo sapiens GN=QPCT PE=1 SV=1	HUMAN	3	sp	Q16769	QPCT_HUMAN
227	6.09	6.09	35.71	19.39	19.39	sp|P30085|KCY_HUMAN	UMP-CMP kinase OS=Homo sapiens GN=CMPK1 PE=1 SV=3	HUMAN	4	sp	P30085	KCY_HUMAN
228	6.02	6.02	11.97	3.854	2.772	sp|Q9UBG0|MRC2_HUMAN	C-type mannose receptor 2 OS=Homo sapiens GN=MRC2 PE=1 SV=2	HUMAN	3	sp	Q9UBG0	MRC2_HUMAN
229	6.01	6.02	31.79	18.54	12.91	sp|O76061|STC2_HUMAN	Stanniocalcin-2 OS=Homo sapiens GN=STC2 PE=1 SV=1	HUMAN	4	sp	O76061	STC2_HUMAN
230	5.99	5.99	42.91	19.54	15.71	sp|Q14847|LASP1_HUMAN	LIM and SH3 domain protein 1 OS=Homo sapiens GN=LASP1 PE=1 SV=2	HUMAN	4	sp	Q14847	LASP1_HUMAN
231	5.92	5.92	52.27	25.38	21.59	sp|P28070|PSB4_HUMAN	Proteasome subunit beta type-4 OS=Homo sapiens GN=PSMB4 PE=1 SV=4	HUMAN	3	sp	P28070	PSB4_HUMAN
232	5.9	6.34	17.95	9.715	5.808	tr|F5H4Z8|F5H4Z8_HUMAN	Thrombospondin-3 OS=Homo sapiens GN=THBS3 PE=1 SV=2	HUMAN	4	tr	F5H4Z8	F5H4Z8_HUMAN
233	5.87	5.87	25.51	18.93	18.93	sp|Q96CG8|CTHR1_HUMAN	Collagen triple helix repeat-containing protein 1 OS=Homo sapiens GN=CTHRC1 PE=1 SV=1	HUMAN	5	sp	Q96CG8	CTHR1_HUMAN
234	5.84	5.84	36.46	20.49	20.49	tr|F6WIT2|F6WIT2_HUMAN	Serine/threonine-protein phosphatase 2A activator OS=Homo sapiens GN=PPP2R4 PE=1 SV=1	HUMAN	4	tr	F6WIT2	F6WIT2_HUMAN
235	5.79	5.79	40.37	20.37	7.85	sp|P78371|TCPB_HUMAN	T-complex protein 1 subunit beta OS=Homo sapiens GN=CCT2 PE=1 SV=4	HUMAN	4	sp	P78371	TCPB_HUMAN
236	5.78	5.79	70.42	58.45	27.46	sp|Q14019|COTL1_HUMAN	Coactosin-like protein OS=Homo sapiens GN=COTL1 PE=1 SV=3	HUMAN	5	sp	Q14019	COTL1_HUMAN
237	5.76	5.76	10.04	4.329	4.329	tr|E9PF17|E9PF17_HUMAN	Versican core protein OS=Homo sapiens GN=VCAN PE=1 SV=2	HUMAN	6	tr	E9PF17	E9PF17_HUMAN
238	5.72	5.72	18.78	5.835	4.636	tr|D6REX3|D6REX3_HUMAN	Protein transport protein Sec31A OS=Homo sapiens GN=SEC31A PE=1 SV=1	HUMAN	4	tr	D6REX3	D6REX3_HUMAN
239	5.72	5.72	22.07	9.982	9.982	sp|Q10471|GALT2_HUMAN	Polypeptide N-acetylgalactosaminyltransferase 2 OS=Homo sapiens GN=GALNT2 PE=1 SV=1	HUMAN	5	sp	Q10471	GALT2_HUMAN
240	5.72	5.72	33.23	23.08	13.85	sp|P14550|AK1A1_HUMAN	Alcohol dehydrogenase [NADP(+)] OS=Homo sapiens GN=AKR1A1 PE=1 SV=3	HUMAN	3	sp	P14550	AK1A1_HUMAN
241	5.71	5.71	41.96	17.03	17.03	sp|P02649|APOE_HUMAN	Apolipoprotein E OS=Homo sapiens GN=APOE PE=1 SV=1	HUMAN	5	sp	P02649	APOE_HUMAN
242	5.69	5.69	45.67	28.74	19.69	tr|A0A087X1Z3|A0A087X1Z3_HUMAN	Proteasome activator complex subunit 2 OS=Homo sapiens GN=PSME2 PE=1 SV=1	HUMAN	4	tr	A0A087X1Z3	A0A087X1Z3_HUMAN
243	5.66	5.66	11.51	4.707	4.707	sp|O00339|MATN2_HUMAN	Matrilin-2 OS=Homo sapiens GN=MATN2 PE=1 SV=4	HUMAN	4	sp	O00339	MATN2_HUMAN
244	5.57	5.57	26.71	10.84	9.639	sp|Q15389|ANGP1_HUMAN	Angiopoietin-1 OS=Homo sapiens GN=ANGPT1 PE=1 SV=2	HUMAN	4	sp	Q15389	ANGP1_HUMAN
245	5.54	5.55	42.9	18.93	18.93	sp|P05388|RLA0_HUMAN	60S acidic ribosomal protein P0 OS=Homo sapiens GN=RPLP0 PE=1 SV=1	HUMAN	3	sp	P05388	RLA0_HUMAN
246	5.53	5.54	20.24	10.6	7.065	tr|F5H365|F5H365_HUMAN	Protein transport protein Sec23A OS=Homo sapiens GN=SEC23A PE=1 SV=1	HUMAN	5	tr	F5H365	F5H365_HUMAN
247	5.44	5.44	32.53	23.18	21.11	sp|P00491|PNPH_HUMAN	Purine nucleoside phosphorylase OS=Homo sapiens GN=PNP PE=1 SV=2	HUMAN	5	sp	P00491	PNPH_HUMAN
248	5.43	5.43	72.66	46.09	36.72	sp|P62987|RL40_HUMAN	Ubiquitin-60S ribosomal protein L40 OS=Homo sapiens GN=UBA52 PE=1 SV=2	HUMAN	4	sp	P62987	RL40_HUMAN
249	5.42	17.9	70.93	51.1	37.89	tr|A0A087WWU8|A0A087WWU8_HUMAN	Tropomyosin alpha-3 chain OS=Homo sapiens GN=TPM3 PE=1 SV=1	HUMAN	11	tr	A0A087WWU8	A0A087WWU8_HUMAN
250	5.37	5.37	28.47	18.29	10.65	sp|P23526|SAHH_HUMAN	Adenosylhomocysteinase OS=Homo sapiens GN=AHCY PE=1 SV=4	HUMAN	4	sp	P23526	SAHH_HUMAN
251	5.31	5.31	19.64	8.357	6.964	sp|Q93063|EXT2_HUMAN	Exostosin-2 OS=Homo sapiens GN=EXT2 PE=1 SV=1	HUMAN	4	sp	Q93063	EXT2_HUMAN
252	5.31	5.31	33.21	28.16	20.94	sp|Q15404|RSU1_HUMAN	Ras suppressor protein 1 OS=Homo sapiens GN=RSU1 PE=1 SV=3	HUMAN	4	sp	Q15404	RSU1_HUMAN
253	5.28	5.38	18.8	7.902	5.177	sp|P02765|FETUA_HUMAN	Alpha-2-HS-glycoprotein OS=Homo sapiens GN=AHSG PE=1 SV=1	HUMAN	12	sp	P02765	FETUA_HUMAN
254	5.22	5.22	35.27	30.29	19.5	sp|O00299|CLIC1_HUMAN	Chloride intracellular channel protein 1 OS=Homo sapiens GN=CLIC1 PE=1 SV=4	HUMAN	4	sp	O00299	CLIC1_HUMAN
255	5.16	5.16	15.25	6.881	5.046	sp|P0C0L4|CO4A_HUMAN	Complement C4-A OS=Homo sapiens GN=C4A PE=1 SV=2	HUMAN	8	sp	P0C0L4	CO4A_HUMAN
256	5.14	5.14	15.23	7.947	4.305	sp|P19022|CADH2_HUMAN	Cadherin-2 OS=Homo sapiens GN=CDH2 PE=1 SV=4	HUMAN	3	sp	P19022	CADH2_HUMAN
257	5.14	5.14	40.3	26.67	20	tr|A0A087WZH7|A0A087WZH7_HUMAN	Myristoylated alanine-rich C-kinase substrate OS=Homo sapiens GN=MARCKS PE=1 SV=1	HUMAN	3	tr	A0A087WZH7	A0A087WZH7_HUMAN
258	5.14	5.14	15.6	6.376	6.376	sp|Q96HC4|PDLI5_HUMAN	PDZ and LIM domain protein 5 OS=Homo sapiens GN=PDLIM5 PE=1 SV=5	HUMAN	3	sp	Q96HC4	PDLI5_HUMAN
259	5.13	5.13	24.66	8.579	5.228	sp|Q96TA1|NIBL1_HUMAN	Niban-like protein 1 OS=Homo sapiens GN=FAM129B PE=1 SV=3	HUMAN	3	sp	Q96TA1	NIBL1_HUMAN
260	5.1	5.1	24.05	11.39	11.39	tr|A0A087X1N8|A0A087X1N8_HUMAN	Serpin B6 OS=Homo sapiens GN=SERPINB6 PE=1 SV=1	HUMAN	4	tr	A0A087X1N8	A0A087X1N8_HUMAN
261	5.09	5.1	19.58	19.58	19.58	sp|P24592|IBP6_HUMAN	Insulin-like growth factor-binding protein 6 OS=Homo sapiens GN=IGFBP6 PE=1 SV=1	HUMAN	8	sp	P24592	IBP6_HUMAN
262	5.04	5.04	36.63	22.77	22.77	tr|F5H6I0|F5H6I0_HUMAN	Beta-2-microglobulin OS=Homo sapiens GN=B2M PE=1 SV=2	HUMAN	5	tr	F5H6I0	F5H6I0_HUMAN
263	5.02	7.22	45.12	33.74	17.48	tr|E7EX29|E7EX29_HUMAN	14-3-3 protein zeta/delta (Fragment) OS=Homo sapiens GN=YWHAZ PE=1 SV=1	HUMAN	4	tr	E7EX29	E7EX29_HUMAN
264	4.98	5.02	79.22	40.91	24.03	sp|P68036|UB2L3_HUMAN	Ubiquitin-conjugating enzyme E2 L3 OS=Homo sapiens GN=UBE2L3 PE=1 SV=1	HUMAN	2	sp	P68036	UB2L3_HUMAN
265	4.97	4.97	52.43	51.46	43.69	sp|P62805|H4_HUMAN	Histone H4 OS=Homo sapiens GN=HIST1H4A PE=1 SV=2	HUMAN	4	sp	P62805	H4_HUMAN
266	4.96	5	11.4	5.89	5.89	sp|P05556|ITB1_HUMAN	Integrin beta-1 OS=Homo sapiens GN=ITGB1 PE=1 SV=2	HUMAN	3	sp	P05556	ITB1_HUMAN
267	4.94	4.94	27.16	21.55	21.55	tr|F8W1A4|F8W1A4_HUMAN	Adenylate kinase 2, mitochondrial OS=Homo sapiens GN=AK2 PE=1 SV=1	HUMAN	4	tr	F8W1A4	F8W1A4_HUMAN
268	4.93	4.93	20.94	20.94	13	sp|P98066|TSG6_HUMAN	Tumor necrosis factor-inducible gene 6 protein OS=Homo sapiens GN=TNFAIP6 PE=1 SV=2	HUMAN	3	sp	P98066	TSG6_HUMAN
269	4.9	4.9	27.41	19.28	15.06	sp|Q53FA7|QORX_HUMAN	Quinone oxidoreductase PIG3 OS=Homo sapiens GN=TP53I3 PE=1 SV=2	HUMAN	4	sp	Q53FA7	QORX_HUMAN
270	4.89	4.89	44.96	35.66	30.23	sp|Q9BTM1|H2AJ_HUMAN	Histone H2A.J OS=Homo sapiens GN=H2AFJ PE=1 SV=1	HUMAN	3	sp	Q9BTM1	H2AJ_HUMAN
271	4.86	4.86	61.9	35.71	35.71	sp|Q99879|H2B1M_HUMAN	Histone H2B type 1-M OS=Homo sapiens GN=HIST1H2BM PE=1 SV=3	HUMAN	4	sp	Q99879	H2B1M_HUMAN
272	4.77	4.77	66.67	29.72	15.26	sp|Q06323|PSME1_HUMAN	Proteasome activator complex subunit 1 OS=Homo sapiens GN=PSME1 PE=1 SV=1	HUMAN	4	sp	Q06323	PSME1_HUMAN
273	4.72	4.99	12.95	9.13	8.068	sp|P23381|SYWC_HUMAN	Tryptophan--tRNA ligase, cytoplasmic OS=Homo sapiens GN=WARS PE=1 SV=2	HUMAN	3	sp	P23381	SYWC_HUMAN
274	4.71	4.72	51.45	23.65	17.01	sp|P78417|GSTO1_HUMAN	Glutathione S-transferase omega-1 OS=Homo sapiens GN=GSTO1 PE=1 SV=2	HUMAN	4	sp	P78417	GSTO1_HUMAN
275	4.6	4.96	41.29	33.83	31.34	sp|P49721|PSB2_HUMAN	Proteasome subunit beta type-2 OS=Homo sapiens GN=PSMB2 PE=1 SV=1	HUMAN	6	sp	P49721	PSB2_HUMAN
276	4.6	4.6	79.26	29.79	18.09	tr|Q5W0H4|Q5W0H4_HUMAN	Translationally-controlled tumor protein OS=Homo sapiens GN=TPT1 PE=1 SV=1	HUMAN	3	tr	Q5W0H4	Q5W0H4_HUMAN
277	4.59	4.6	26.33	11.39	5.894	tr|H3BS10|H3BS10_HUMAN	Beta-hexosaminidase OS=Homo sapiens GN=HEXA PE=1 SV=1	HUMAN	3	tr	H3BS10	H3BS10_HUMAN
278	4.51	4.51	38.54	26.83	19.02	sp|P49720|PSB3_HUMAN	Proteasome subunit beta type-3 OS=Homo sapiens GN=PSMB3 PE=1 SV=2	HUMAN	3	sp	P49720	PSB3_HUMAN
279	4.5	4.5	46.48	34.51	28.17	sp|P69905|HBA_HUMAN	Hemoglobin subunit alpha OS=Homo sapiens GN=HBA1 PE=1 SV=2	HUMAN	3	sp	P69905	HBA_HUMAN
280	4.49	4.49	22.35	8.471	8.471	tr|D6RGI3|D6RGI3_HUMAN	Septin 11, isoform CRA_b OS=Homo sapiens GN=SEPT11 PE=1 SV=1	HUMAN	3	tr	D6RGI3	D6RGI3_HUMAN
281	4.48	4.74	29.45	21.92	10.62	tr|G3V4C1|G3V4C1_HUMAN	Heterogeneous nuclear ribonucleoproteins C1/C2 OS=Homo sapiens GN=HNRNPC PE=1 SV=1	HUMAN	4	tr	G3V4C1	G3V4C1_HUMAN
282	4.47	4.47	24	19	11	sp|P61026|RAB10_HUMAN	Ras-related protein Rab-10 OS=Homo sapiens GN=RAB10 PE=1 SV=1	HUMAN	2	sp	P61026	RAB10_HUMAN
283	4.45	4.45	27.18	17.18	11.03	sp|P01137|TGFB1_HUMAN	Transforming growth factor beta-1 OS=Homo sapiens GN=TGFB1 PE=1 SV=2	HUMAN	3	sp	P01137	TGFB1_HUMAN
284	4.39	4.51	37.15	24.9	19.37	sp|Q9Y696|CLIC4_HUMAN	Chloride intracellular channel protein 4 OS=Homo sapiens GN=CLIC4 PE=1 SV=4	HUMAN	5	sp	Q9Y696	CLIC4_HUMAN
285	4.32	4.37	28.94	14.9	11.17	sp|Q6IBS0|TWF2_HUMAN	Twinfilin-2 OS=Homo sapiens GN=TWF2 PE=1 SV=2	HUMAN	2	sp	Q6IBS0	TWF2_HUMAN
286	4.3	19.72	42.37	24.01	20.58	sp|P35241|RADI_HUMAN	Radixin OS=Homo sapiens GN=RDX PE=1 SV=1	HUMAN	12	sp	P35241	RADI_HUMAN
287	4.3	4.3	38.82	25.1	12.16	sp|P25788|PSA3_HUMAN	Proteasome subunit alpha type-3 OS=Homo sapiens GN=PSMA3 PE=1 SV=2	HUMAN	2	sp	P25788	PSA3_HUMAN
288	4.24	4.69	32.11	23.85	11.31	sp|O75436|VP26A_HUMAN	Vacuolar protein sorting-associated protein 26A OS=Homo sapiens GN=VPS26A PE=1 SV=2	HUMAN	3	sp	O75436	VP26A_HUMAN
289	4.24	4.24	11.23	5.027	3.957	tr|Q5T985|Q5T985_HUMAN	Inter-alpha-trypsin inhibitor heavy chain H2 OS=Homo sapiens GN=ITIH2 PE=1 SV=1	HUMAN	3	tr	Q5T985	Q5T985_HUMAN
290	4.17	4.17	34.23	15.02	12.01	sp|P07711|CATL1_HUMAN	Cathepsin L1 OS=Homo sapiens GN=CTSL PE=1 SV=2	HUMAN	3	sp	P07711	CATL1_HUMAN
291	4.1	4.1	52.38	28.57	12.38	tr|Q5T9B7|Q5T9B7_HUMAN	Adenylate kinase isoenzyme 1 OS=Homo sapiens GN=AK1 PE=1 SV=1	HUMAN	2	tr	Q5T9B7	Q5T9B7_HUMAN
292	4.08	4.25	57.98	27.73	27.73	tr|E5RJD8|E5RJD8_HUMAN	Tubulin-specific chaperone A OS=Homo sapiens GN=TBCA PE=1 SV=1	HUMAN	4	tr	E5RJD8	E5RJD8_HUMAN
293	4.08	4.08	19.37	19.37	12.16	sp|Q9BS40|LXN_HUMAN	Latexin OS=Homo sapiens GN=LXN PE=1 SV=2	HUMAN	2	sp	Q9BS40	LXN_HUMAN
294	4.06	4.06	24.08	11.65	4.466	sp|P11413|G6PD_HUMAN	Glucose-6-phosphate 1-dehydrogenase OS=Homo sapiens GN=G6PD PE=1 SV=4	HUMAN	3	sp	P11413	G6PD_HUMAN
295	4.05	4.05	20.38	12.2	5.575	sp|P21589|5NTD_HUMAN	5'-nucleotidase OS=Homo sapiens GN=NT5E PE=1 SV=1	HUMAN	2	sp	P21589	5NTD_HUMAN
296	4.04	4.04	11.65	3.276	2.639	tr|H0Y8C6|H0Y8C6_HUMAN	Importin-5 (Fragment) OS=Homo sapiens GN=IPO5 PE=1 SV=1	HUMAN	2	tr	H0Y8C6	H0Y8C6_HUMAN
297	4.03	4.03	49.38	31.25	31.25	tr|E9PP21|E9PP21_HUMAN	Cysteine and glycine-rich protein 1 OS=Homo sapiens GN=CSRP1 PE=1 SV=1	HUMAN	3	tr	E9PP21	E9PP21_HUMAN
298	4.01	24.83	65.85	46.48	41.9	sp|P07951|TPM2_HUMAN	Tropomyosin beta chain OS=Homo sapiens GN=TPM2 PE=1 SV=1	HUMAN	15	sp	P07951	TPM2_HUMAN
299	4	251.24	65.04	56.99	53.87	tr|E7ENL6|E7ENL6_HUMAN	Collagen alpha-3(VI) chain OS=Homo sapiens GN=COL6A3 PE=1 SV=2	HUMAN	167	tr	E7ENL6	E7ENL6_HUMAN
300	4	4.03	36.72	11.04	11.04	sp|O76003|GLRX3_HUMAN	Glutaredoxin-3 OS=Homo sapiens GN=GLRX3 PE=1 SV=2	HUMAN	2	sp	O76003	GLRX3_HUMAN
301	4	4	9.154	1.526	1.526	sp|A1L4H1|SRCRL_HUMAN	Soluble scavenger receptor cysteine-rich domain-containing protein SSC5D OS=Homo sapiens GN=SSC5D PE=2 SV=3	HUMAN	3	sp	A1L4H1	SRCRL_HUMAN
302	4	4	5.823	1.396	1.396	sp|E9PAV3|NACAM_HUMAN	Nascent polypeptide-associated complex subunit alpha, muscle-specific form OS=Homo sapiens GN=NACA PE=1 SV=1	HUMAN	2	sp	E9PAV3	NACAM_HUMAN
303	4	4	7.368	4	4	sp|Q96KP4|CNDP2_HUMAN	Cytosolic non-specific dipeptidase OS=Homo sapiens GN=CNDP2 PE=1 SV=2	HUMAN	2	sp	Q96KP4	CNDP2_HUMAN
304	3.95	3.99	9.361	3.634	2.974	sp|Q13200|PSMD2_HUMAN	26S proteasome non-ATPase regulatory subunit 2 OS=Homo sapiens GN=PSMD2 PE=1 SV=3	HUMAN	2	sp	Q13200	PSMD2_HUMAN
305	3.91	3.91	9.247	4.888	3.567	sp|Q9HCU0|CD248_HUMAN	Endosialin OS=Homo sapiens GN=CD248 PE=1 SV=1	HUMAN	3	sp	Q9HCU0	CD248_HUMAN
306	3.89	3.89	16.32	5.985	5.223	sp|P55786|PSA_HUMAN	Puromycin-sensitive aminopeptidase OS=Homo sapiens GN=NPEPPS PE=1 SV=2	HUMAN	4	sp	P55786	PSA_HUMAN
307	3.87	3.87	11.24	6.627	4.418	tr|X6R8A1|X6R8A1_HUMAN	Carboxypeptidase OS=Homo sapiens GN=CTSA PE=1 SV=1	HUMAN	2	tr	X6R8A1	X6R8A1_HUMAN
308	3.8	6.07	42.91	28.34	19.84	sp|P61981|1433G_HUMAN	14-3-3 protein gamma OS=Homo sapiens GN=YWHAG PE=1 SV=2	HUMAN	5	sp	P61981	1433G_HUMAN
309	3.78	4.99	32.23	27.41	20.05	sp|P61160|ARP2_HUMAN	Actin-related protein 2 OS=Homo sapiens GN=ACTR2 PE=1 SV=1	HUMAN	6	sp	P61160	ARP2_HUMAN
310	3.75	3.75	19.81	13.93	9.288	tr|A0A0A0MSS8|A0A0A0MSS8_HUMAN	Aldo-keto reductase family 1 member C3 OS=Homo sapiens GN=AKR1C3 PE=1 SV=1	HUMAN	2	tr	A0A0A0MSS8	A0A0A0MSS8_HUMAN
311	3.74	3.74	28.45	13.39	8.787	sp|P28072|PSB6_HUMAN	Proteasome subunit beta type-6 OS=Homo sapiens GN=PSMB6 PE=1 SV=4	HUMAN	2	sp	P28072	PSB6_HUMAN
312	3.72	3.72	10.29	4.502	1.801	sp|Q9NYU2|UGGG1_HUMAN	UDP-glucose:glycoprotein glucosyltransferase 1 OS=Homo sapiens GN=UGGT1 PE=1 SV=3	HUMAN	3	sp	Q9NYU2	UGGG1_HUMAN
313	3.68	3.68	18.09	7.447	4.362	sp|Q7Z7M9|GALT5_HUMAN	Polypeptide N-acetylgalactosaminyltransferase 5 OS=Homo sapiens GN=GALNT5 PE=1 SV=1	HUMAN	3	sp	Q7Z7M9	GALT5_HUMAN
314	3.68	3.68	34.33	21.27	10.45	sp|P04632|CPNS1_HUMAN	Calpain small subunit 1 OS=Homo sapiens GN=CAPNS1 PE=1 SV=1	HUMAN	2	sp	P04632	CPNS1_HUMAN
315	3.65	3.65	32.58	18.1	11.76	tr|D6RAF8|D6RAF8_HUMAN	Heterogeneous nuclear ribonucleoprotein D0 (Fragment) OS=Homo sapiens GN=HNRNPD PE=1 SV=1	HUMAN	2	tr	D6RAF8	D6RAF8_HUMAN
316	3.62	3.62	13.39	6.491	5.274	sp|P55058|PLTP_HUMAN	Phospholipid transfer protein OS=Homo sapiens GN=PLTP PE=1 SV=1	HUMAN	2	sp	P55058	PLTP_HUMAN
317	3.59	184.87	89.12	84.59	81.69	tr|H0Y7Z1|H0Y7Z1_HUMAN	Fibronectin (Fragment) OS=Homo sapiens GN=FN1 PE=1 SV=1	HUMAN	405	tr	H0Y7Z1	H0Y7Z1_HUMAN
318	3.56	3.56	42.93	19.02	19.02	tr|B0QYN7|B0QYN7_HUMAN	SUMO-conjugating enzyme UBC9 OS=Homo sapiens GN=UBE2I PE=1 SV=1	HUMAN	3	tr	B0QYN7	B0QYN7_HUMAN
319	3.55	3.55	18.81	13.2	6.271	sp|O75083|WDR1_HUMAN	WD repeat-containing protein 1 OS=Homo sapiens GN=WDR1 PE=1 SV=4	HUMAN	2	sp	O75083	WDR1_HUMAN
320	3.55	3.55	18.18	8.741	8.741	sp|P52907|CAZA1_HUMAN	F-actin-capping protein subunit alpha-1 OS=Homo sapiens GN=CAPZA1 PE=1 SV=3	HUMAN	2	sp	P52907	CAZA1_HUMAN
321	3.52	3.52	70.59	52.94	35.29	sp|P61604|CH10_HUMAN	10 kDa heat shock protein, mitochondrial OS=Homo sapiens GN=HSPE1 PE=1 SV=2	HUMAN	3	sp	P61604	CH10_HUMAN
322	3.46	3.46	15.89	6.992	6.992	tr|G8JLB6|G8JLB6_HUMAN	Heterogeneous nuclear ribonucleoprotein H OS=Homo sapiens GN=HNRNPH1 PE=1 SV=1	HUMAN	2	tr	G8JLB6	G8JLB6_HUMAN
323	3.41	4.28	29	12.81	8.851	sp|P40227|TCPZ_HUMAN	T-complex protein 1 subunit zeta OS=Homo sapiens GN=CCT6A PE=1 SV=3	HUMAN	3	sp	P40227	TCPZ_HUMAN
324	3.4	3.4	36.49	14.59	8.378	sp|Q9Y617|SERC_HUMAN	Phosphoserine aminotransferase OS=Homo sapiens GN=PSAT1 PE=1 SV=2	HUMAN	3	sp	Q9Y617	SERC_HUMAN
325	3.39	3.4	24.14	13.41	6.897	sp|P25789|PSA4_HUMAN	Proteasome subunit alpha type-4 OS=Homo sapiens GN=PSMA4 PE=1 SV=1	HUMAN	2	sp	P25789	PSA4_HUMAN
326	3.37	3.37	27.05	13.37	7.295	sp|Q15417|CNN3_HUMAN	Calponin-3 OS=Homo sapiens GN=CNN3 PE=1 SV=1	HUMAN	2	sp	Q15417	CNN3_HUMAN
327	3.34	3.34	19.59	19.59	15.51	sp|P56537|IF6_HUMAN	Eukaryotic translation initiation factor 6 OS=Homo sapiens GN=EIF6 PE=1 SV=1	HUMAN	2	sp	P56537	IF6_HUMAN
328	3.33	18.92	51.37	22.7	15.19	sp|P15311|EZRI_HUMAN	Ezrin OS=Homo sapiens GN=EZR PE=1 SV=4	HUMAN	10	sp	P15311	EZRI_HUMAN
329	3.33	3.33	42	32.8	24.4	sp|P17931|LEG3_HUMAN	Galectin-3 OS=Homo sapiens GN=LGALS3 PE=1 SV=5	HUMAN	5	sp	P17931	LEG3_HUMAN
330	3.31	3.32	20.51	7.727	6.984	sp|P08133|ANXA6_HUMAN	Annexin A6 OS=Homo sapiens GN=ANXA6 PE=1 SV=3	HUMAN	3	sp	P08133	ANXA6_HUMAN
331	3.29	3.32	37.16	19.54	14.56	sp|P12004|PCNA_HUMAN	Proliferating cell nuclear antigen OS=Homo sapiens GN=PCNA PE=1 SV=1	HUMAN	3	sp	P12004	PCNA_HUMAN
332	3.28	3.28	29.96	12.66	5.485	sp|Q9ULV4|COR1C_HUMAN	Coronin-1C OS=Homo sapiens GN=CORO1C PE=1 SV=1	HUMAN	2	sp	Q9ULV4	COR1C_HUMAN
333	3.27	3.28	4.096	4.096	4.096	sp|P05543|THBG_HUMAN	Thyroxine-binding globulin OS=Homo sapiens GN=SERPINA7 PE=1 SV=2	HUMAN	2	sp	P05543	THBG_HUMAN
334	3.26	3.38	22.04	13.17	8.333	sp|O15143|ARC1B_HUMAN	Actin-related protein 2/3 complex subunit 1B OS=Homo sapiens GN=ARPC1B PE=1 SV=3	HUMAN	2	sp	O15143	ARC1B_HUMAN
335	3.25	3.25	20.36	7.857	7.857	tr|D6R9P3|D6R9P3_HUMAN	Heterogeneous nuclear ribonucleoprotein A/B OS=Homo sapiens GN=HNRNPAB PE=1 SV=1	HUMAN	2	tr	D6R9P3	D6R9P3_HUMAN
336	3.22	3.22	19.42	8.705	6.25	tr|A6NJA2|A6NJA2_HUMAN	Ubiquitin carboxyl-terminal hydrolase OS=Homo sapiens GN=USP14 PE=1 SV=2	HUMAN	3	tr	A6NJA2	A6NJA2_HUMAN
337	3.21	3.21	8.785	2.43	2.43	sp|Q13308|PTK7_HUMAN	Inactive tyrosine-protein kinase 7 OS=Homo sapiens GN=PTK7 PE=1 SV=2	HUMAN	2	sp	Q13308	PTK7_HUMAN
338	3.2	3.29	45.83	21.88	19.27	sp|Q07812|BAX_HUMAN	Apoptosis regulator BAX OS=Homo sapiens GN=BAX PE=1 SV=1	HUMAN	3	sp	Q07812	BAX_HUMAN
339	3.2	3.2	49.52	31.43	22.86	sp|P10599|THIO_HUMAN	Thioredoxin OS=Homo sapiens GN=TXN PE=1 SV=3	HUMAN	3	sp	P10599	THIO_HUMAN
340	3.14	3.14	39.5	12.61	12.61	sp|P60866|RS20_HUMAN	40S ribosomal protein S20 OS=Homo sapiens GN=RPS20 PE=1 SV=1	HUMAN	2	sp	P60866	RS20_HUMAN
341	3.13	3.14	49.45	18.68	15.38	sp|P55145|MANF_HUMAN	Mesencephalic astrocyte-derived neurotrophic factor OS=Homo sapiens GN=MANF PE=1 SV=3	HUMAN	3	sp	P55145	MANF_HUMAN
342	3.11	3.11	16.98	7.008	7.008	tr|H7C2I1|H7C2I1_HUMAN	Protein arginine N-methyltransferase 1 OS=Homo sapiens GN=PRMT1 PE=1 SV=1	HUMAN	2	tr	H7C2I1	H7C2I1_HUMAN
343	3.1	3.11	10.61	3.904	2.202	sp|Q9Y4L1|HYOU1_HUMAN	Hypoxia up-regulated protein 1 OS=Homo sapiens GN=HYOU1 PE=1 SV=1	HUMAN	2	sp	Q9Y4L1	HYOU1_HUMAN
344	3.05	3.05	24.15	16.19	6.818	tr|B4DY09|B4DY09_HUMAN	Interleukin enhancer-binding factor 2 OS=Homo sapiens GN=ILF2 PE=1 SV=1	HUMAN	2	tr	B4DY09	B4DY09_HUMAN
345	3.03	3.03	16.14	11.69	7.792	sp|P50991|TCPD_HUMAN	T-complex protein 1 subunit delta OS=Homo sapiens GN=CCT4 PE=1 SV=4	HUMAN	2	sp	P50991	TCPD_HUMAN
346	3.02	3.42	17.81	8.547	4.558	sp|Q04446|GLGB_HUMAN	1,4-alpha-glucan-branching enzyme OS=Homo sapiens GN=GBE1 PE=1 SV=3	HUMAN	2	sp	Q04446	GLGB_HUMAN
347	3.01	3.02	24.76	7.452	6.25	tr|J3KQ32|J3KQ32_HUMAN	Obg-like ATPase 1 OS=Homo sapiens GN=OLA1 PE=1 SV=1	HUMAN	2	tr	J3KQ32	J3KQ32_HUMAN
348	2.97	2.97	19.81	8.115	4.773	sp|P49767|VEGFC_HUMAN	Vascular endothelial growth factor C OS=Homo sapiens GN=VEGFC PE=1 SV=1	HUMAN	2	sp	P49767	VEGFC_HUMAN
349	2.94	2.94	40.46	31.21	22.54	sp|Q969H8|CS010_HUMAN	UPF0556 protein C19orf10 OS=Homo sapiens GN=C19orf10 PE=1 SV=1	HUMAN	3	sp	Q969H8	CS010_HUMAN
350	2.93	3.05	16.15	2.993	1.87	sp|Q07092|COGA1_HUMAN	Collagen alpha-1(XVI) chain OS=Homo sapiens GN=COL16A1 PE=1 SV=2	HUMAN	4	sp	Q07092	COGA1_HUMAN
351	2.84	2.84	27.23	21.43	12.05	sp|Q00688|FKBP3_HUMAN	Peptidyl-prolyl cis-trans isomerase FKBP3 OS=Homo sapiens GN=FKBP3 PE=1 SV=1	HUMAN	3	sp	Q00688	FKBP3_HUMAN
352	2.82	2.82	10.78	3.081	3.081	tr|E9PG40|E9PG40_HUMAN	Amyloid beta A4 protein OS=Homo sapiens GN=APP PE=1 SV=1	HUMAN	2	tr	E9PG40	E9PG40_HUMAN
353	2.81	2.81	8.359	1.475	1.475	sp|Q13219|PAPP1_HUMAN	Pappalysin-1 OS=Homo sapiens GN=PAPPA PE=1 SV=3	HUMAN	2	sp	Q13219	PAPP1_HUMAN
354	2.81	2.81	16.1	3.757	3.757	sp|P02748|CO9_HUMAN	Complement component C9 OS=Homo sapiens GN=C9 PE=1 SV=2	HUMAN	2	sp	P02748	CO9_HUMAN
355	2.81	2.81	7.062	7.062	5.239	sp|Q08629|TICN1_HUMAN	Testican-1 OS=Homo sapiens GN=SPOCK1 PE=1 SV=1	HUMAN	2	sp	Q08629	TICN1_HUMAN
356	2.8	2.8	38.75	17.5	17.5	tr|F8VVL1|F8VVL1_HUMAN	Density-regulated protein OS=Homo sapiens GN=DENR PE=1 SV=1	HUMAN	2	tr	F8VVL1	F8VVL1_HUMAN
357	2.77	2.77	27.46	9.155	9.155	sp|P26885|FKBP2_HUMAN	Peptidyl-prolyl cis-trans isomerase FKBP2 OS=Homo sapiens GN=FKBP2 PE=1 SV=2	HUMAN	2	sp	P26885	FKBP2_HUMAN
358	2.76	2.76	34.44	6.042	6.042	sp|Q9Y266|NUDC_HUMAN	Nuclear migration protein nudC OS=Homo sapiens GN=NUDC PE=1 SV=1	HUMAN	2	sp	Q9Y266	NUDC_HUMAN
359	2.75	2.75	21.01	5.382	3.646	tr|G3XAM2|G3XAM2_HUMAN	Complement factor I OS=Homo sapiens GN=CFI PE=1 SV=1	HUMAN	2	tr	G3XAM2	G3XAM2_HUMAN
360	2.74	2.74	21.95	10.03	6.233	sp|P50502|F10A1_HUMAN	Hsc70-interacting protein OS=Homo sapiens GN=ST13 PE=1 SV=2	HUMAN	2	sp	P50502	F10A1_HUMAN
361	2.74	2.74	24.25	7.641	7.641	tr|C9J3R8|C9J3R8_HUMAN	Beta-1,4-galactosyltransferase 4 OS=Homo sapiens GN=B4GALT4 PE=1 SV=1	HUMAN	2	tr	C9J3R8	C9J3R8_HUMAN
362	2.69	2.69	16.81	8.555	5.9	tr|A0A087X0K1|A0A087X0K1_HUMAN	Calcium-binding protein 39 OS=Homo sapiens GN=CAB39 PE=1 SV=1	HUMAN	2	tr	A0A087X0K1	A0A087X0K1_HUMAN
363	2.68	2.77	18.21	2.602	1.888	sp|P35579|MYH9_HUMAN	Myosin-9 OS=Homo sapiens GN=MYH9 PE=1 SV=4	HUMAN	3	sp	P35579	MYH9_HUMAN
364	2.65	4.24	60.24	47.59	37.95	sp|Q9Y281|COF2_HUMAN	Cofilin-2 OS=Homo sapiens GN=CFL2 PE=1 SV=1	HUMAN	4	sp	Q9Y281	COF2_HUMAN
365	2.61	2.7	26.54	8.333	6.79	sp|P51665|PSMD7_HUMAN	26S proteasome non-ATPase regulatory subunit 7 OS=Homo sapiens GN=PSMD7 PE=1 SV=2	HUMAN	2	sp	P51665	PSMD7_HUMAN
366	2.61	2.61	23.53	12.14	8.159	tr|A6NLN1|A6NLN1_HUMAN	Polypyrimidine tract binding protein 1, isoform CRA_b OS=Homo sapiens GN=PTBP1 PE=1 SV=4	HUMAN	2	tr	A6NLN1	A6NLN1_HUMAN
367	2.61	2.61	42.22	25.56	25.56	tr|F8W6P5|F8W6P5_HUMAN	Hemoglobin subunit beta (Fragment) OS=Homo sapiens GN=HBB PE=1 SV=1	HUMAN	3	tr	F8W6P5	F8W6P5_HUMAN
368	2.59	2.59	11.43	6.349	6.349	sp|P05198|IF2A_HUMAN	Eukaryotic translation initiation factor 2 subunit 1 OS=Homo sapiens GN=EIF2S1 PE=1 SV=3	HUMAN	2	sp	P05198	IF2A_HUMAN
369	2.57	2.57	22.05	9.97	3.625	sp|Q15293|RCN1_HUMAN	Reticulocalbin-1 OS=Homo sapiens GN=RCN1 PE=1 SV=1	HUMAN	2	sp	Q15293	RCN1_HUMAN
371	2.55	2.55	20.05	7.289	7.289	sp|Q07960|RHG01_HUMAN	Rho GTPase-activating protein 1 OS=Homo sapiens GN=ARHGAP1 PE=1 SV=1	HUMAN	2	sp	Q07960	RHG01_HUMAN
372	2.53	2.53	29.63	29.63	25	sp|P62942|FKB1A_HUMAN	Peptidyl-prolyl cis-trans isomerase FKBP1A OS=Homo sapiens GN=FKBP1A PE=1 SV=2	HUMAN	2	sp	P62942	FKB1A_HUMAN
374	2.49	2.77	31.8	11.93	6.422	sp|P62140|PP1B_HUMAN	Serine/threonine-protein phosphatase PP1-beta catalytic subunit OS=Homo sapiens GN=PPP1CB PE=1 SV=3	HUMAN	2	sp	P62140	PP1B_HUMAN
375	2.49	2.49	28.21	6.526	6.526	sp|Q01518|CAP1_HUMAN	Adenylyl cyclase-associated protein 1 OS=Homo sapiens GN=CAP1 PE=1 SV=5	HUMAN	2	sp	Q01518	CAP1_HUMAN
376	2.48	2.52	15.53	6.588	4.941	tr|Q5STU3|Q5STU3_HUMAN	Spliceosome RNA helicase DDX39B OS=Homo sapiens GN=DDX39B PE=1 SV=2	HUMAN	2	tr	Q5STU3	Q5STU3_HUMAN
377	2.47	6.89	24.53	24.53	12.74	sp|P45877|PPIC_HUMAN	Peptidyl-prolyl cis-trans isomerase C OS=Homo sapiens GN=PPIC PE=1 SV=1	HUMAN	3	sp	P45877	PPIC_HUMAN
379	2.41	2.41	19.82	10.06	10.06	sp|O95433|AHSA1_HUMAN	Activator of 90 kDa heat shock protein ATPase homolog 1 OS=Homo sapiens GN=AHSA1 PE=1 SV=1	HUMAN	2	sp	O95433	AHSA1_HUMAN
380	2.41	2.41	8.246	4.386	2.982	sp|Q14195|DPYL3_HUMAN	Dihydropyrimidinase-related protein 3 OS=Homo sapiens GN=DPYSL3 PE=1 SV=1	HUMAN	2	sp	Q14195	DPYL3_HUMAN
382	2.37	2.37	42.74	26.14	5.394	tr|D6R956|D6R956_HUMAN	Ubiquitin carboxyl-terminal hydrolase OS=Homo sapiens GN=UCHL1 PE=1 SV=1	HUMAN	2	tr	D6R956	D6R956_HUMAN
386	2.32	2.32	38.64	34.09	24.24	sp|P25398|RS12_HUMAN	40S ribosomal protein S12 OS=Homo sapiens GN=RPS12 PE=1 SV=3	HUMAN	2	sp	P25398	RS12_HUMAN
388	2.31	2.31	7.95	5.649	3.138	sp|P04004|VTNC_HUMAN	Vitronectin OS=Homo sapiens GN=VTN PE=1 SV=1	HUMAN	3	sp	P04004	VTNC_HUMAN
389	2.31	2.31	21.4	12.23	12.23	sp|P68402|PA1B2_HUMAN	Platelet-activating factor acetylhydrolase IB subunit beta OS=Homo sapiens GN=PAFAH1B2 PE=1 SV=1	HUMAN	2	sp	P68402	PA1B2_HUMAN
390	2.29	2.29	20.74	20.74	20.74	tr|C9IZG4|C9IZG4_HUMAN	Protein CutA OS=Homo sapiens GN=CUTA PE=1 SV=1	HUMAN	2	tr	C9IZG4	C9IZG4_HUMAN
394	2.26	4.63	35.77	32.11	20.73	sp|P31946|1433B_HUMAN	14-3-3 protein beta/alpha OS=Homo sapiens GN=YWHAB PE=1 SV=3	HUMAN	5	sp	P31946	1433B_HUMAN
395	2.26	2.26	8.417	2.764	2.764	sp|P55287|CAD11_HUMAN	Cadherin-11 OS=Homo sapiens GN=CDH11 PE=1 SV=2	HUMAN	2	sp	P55287	CAD11_HUMAN
396	2.26	2.26	23.79	15.09	11	sp|P38159|RBMX_HUMAN	RNA-binding motif protein, X chromosome OS=Homo sapiens GN=RBMX PE=1 SV=3	HUMAN	3	sp	P38159	RBMX_HUMAN
397	2.25	2.25	21.26	7.246	7.246	tr|E7ET40|E7ET40_HUMAN	Urokinase-type plasminogen activator OS=Homo sapiens GN=PLAU PE=1 SV=1	HUMAN	2	tr	E7ET40	E7ET40_HUMAN
399	2.21	2.21	35.45	8.201	8.201	sp|Q16543|CDC37_HUMAN	Hsp90 co-chaperone Cdc37 OS=Homo sapiens GN=CDC37 PE=1 SV=1	HUMAN	2	sp	Q16543	CDC37_HUMAN
401	2.2	2.2	24.28	8.094	4.722	sp|P28799|GRN_HUMAN	Granulins OS=Homo sapiens GN=GRN PE=1 SV=2	HUMAN	2	sp	P28799	GRN_HUMAN
402	2.18	9.66	41.07	22.92	16.67	tr|A8MVZ9|A8MVZ9_HUMAN	Fructose-bisphosphate aldolase OS=Homo sapiens GN=ALDOC PE=1 SV=1	HUMAN	5	tr	A8MVZ9	A8MVZ9_HUMAN
403	2.18	2.78	16.02	12.89	8.203	sp|P30048|PRDX3_HUMAN	Thioredoxin-dependent peroxide reductase, mitochondrial OS=Homo sapiens GN=PRDX3 PE=1 SV=3	HUMAN	2	sp	P30048	PRDX3_HUMAN
404	2.18	2.18	20.64	14.91	8.486	tr|E9PRU1|E9PRU1_HUMAN	EGF-containing fibulin-like extracellular matrix protein 2 OS=Homo sapiens GN=EFEMP2 PE=1 SV=1	HUMAN	2	tr	E9PRU1	E9PRU1_HUMAN
405	2.17	2.18	31.54	27.52	20.81	sp|Q15828|CYTM_HUMAN	Cystatin-M OS=Homo sapiens GN=CST6 PE=1 SV=1	HUMAN	2	sp	Q15828	CYTM_HUMAN
408	2.16	15.78	18.05	10.42	9.86	sp|Q6S8J3|POTEE_HUMAN	POTE ankyrin domain family member E OS=Homo sapiens GN=POTEE PE=1 SV=3	HUMAN	17	sp	Q6S8J3	POTEE_HUMAN
410	2.15	10.1	27.8	10.68	7.458	sp|P13647|K2C5_HUMAN	Keratin, type II cytoskeletal 5 OS=Homo sapiens GN=KRT5 PE=1 SV=3	HUMAN	5	sp	P13647	K2C5_HUMAN
412	2.14	2.14	44.74	35.96	27.19	sp|O75368|SH3L1_HUMAN	SH3 domain-binding glutamic acid-rich-like protein OS=Homo sapiens GN=SH3BGRL PE=1 SV=1	HUMAN	2	sp	O75368	SH3L1_HUMAN
415	2.12	2.12	34.69	34.69	34.69	sp|Q96C90|PP14B_HUMAN	Protein phosphatase 1 regulatory subunit 14B OS=Homo sapiens GN=PPP1R14B PE=1 SV=3	HUMAN	2	sp	Q96C90	PP14B_HUMAN
417	2.11	2.11	26.83	26.83	15.45	sp|Q9BRA2|TXD17_HUMAN	Thioredoxin domain-containing protein 17 OS=Homo sapiens GN=TXNDC17 PE=1 SV=1	HUMAN	2	sp	Q9BRA2	TXD17_HUMAN
421	2.1	2.1	17.15	6.596	5.541	sp|P30740|ILEU_HUMAN	Leukocyte elastase inhibitor OS=Homo sapiens GN=SERPINB1 PE=1 SV=1	HUMAN	2	sp	P30740	ILEU_HUMAN
423	2.08	2.08	23.33	18.89	10.56	sp|O43617|TPPC3_HUMAN	Trafficking protein particle complex subunit 3 OS=Homo sapiens GN=TRAPPC3 PE=1 SV=1	HUMAN	2	sp	O43617	TPPC3_HUMAN
424	2.07	2.91	25.2	4.4	3.2	tr|B4DUR8|B4DUR8_HUMAN	T-complex protein 1 subunit gamma OS=Homo sapiens GN=CCT3 PE=1 SV=1	HUMAN	2	tr	B4DUR8	B4DUR8_HUMAN
426	2.07	2.07	25	9.701	7.463	sp|Q15691|MARE1_HUMAN	Microtubule-associated protein RP/EB family member 1 OS=Homo sapiens GN=MAPRE1 PE=1 SV=3	HUMAN	2	sp	Q15691	MARE1_HUMAN
429	2.06	2.06	24.2	14.16	14.16	sp|P28065|PSB9_HUMAN	Proteasome subunit beta type-9 OS=Homo sapiens GN=PSMB9 PE=1 SV=2	HUMAN	2	sp	P28065	PSB9_HUMAN
432	2.03	2.03	37.65	37.65	18.82	tr|R4GN98|R4GN98_HUMAN	Protein S100 (Fragment) OS=Homo sapiens GN=S100A6 PE=1 SV=1	HUMAN	2	tr	R4GN98	R4GN98_HUMAN
437	2.01	20	59.68	48.81	36.34	sp|P68133|ACTS_HUMAN	Actin, alpha skeletal muscle OS=Homo sapiens GN=ACTA1 PE=1 SV=1	HUMAN	23	sp	P68133	ACTS_HUMAN
440	2	20.44	40.35	35.25	32.37	sp|Q71U36|TBA1A_HUMAN	Tubulin alpha-1A chain OS=Homo sapiens GN=TUBA1A PE=1 SV=1	HUMAN	12	sp	Q71U36	TBA1A_HUMAN
441	2	4.53	52.65	23.27	12.65	sp|P27348|1433T_HUMAN	14-3-3 protein theta OS=Homo sapiens GN=YWHAQ PE=1 SV=1	HUMAN	3	sp	P27348	1433T_HUMAN
455	1.98	1.98	20.7	13.22	13.22	sp|O43809|CPSF5_HUMAN	Cleavage and polyadenylation specificity factor subunit 5 OS=Homo sapiens GN=NUDT21 PE=1 SV=1	HUMAN	3	sp	O43809	CPSF5_HUMAN
456	1.97	3.16	5.771	1.784	1.784	tr|A0A087WW66|A0A087WW66_HUMAN	26S proteasome non-ATPase regulatory subunit 1 OS=Homo sapiens GN=PSMD1 PE=1 SV=1	HUMAN	2	tr	A0A087WW66	A0A087WW66_HUMAN
458	1.96	1.96	14.78	4.811	2.405	sp|P50281|MMP14_HUMAN	Matrix metalloproteinase-14 OS=Homo sapiens GN=MMP14 PE=1 SV=3	HUMAN	2	sp	P50281	MMP14_HUMAN
459	1.96	1.96	15.75	7.221	4.595	sp|Q9NR12|PDLI7_HUMAN	PDZ and LIM domain protein 7 OS=Homo sapiens GN=PDLIM7 PE=1 SV=1	HUMAN	2	sp	Q9NR12	PDLI7_HUMAN
460	1.96	1.96	11.34	3.846	3.846	sp|O60701|UGDH_HUMAN	UDP-glucose 6-dehydrogenase OS=Homo sapiens GN=UGDH PE=1 SV=1	HUMAN	2	sp	O60701	UGDH_HUMAN
463	1.92	3.84	16.73	7.734	2.698	sp|P17987|TCPA_HUMAN	T-complex protein 1 subunit alpha OS=Homo sapiens GN=TCP1 PE=1 SV=1	HUMAN	2	sp	P17987	TCPA_HUMAN
470	1.85	1.85	26.79	12.15	12.15	tr|B5MCX3|B5MCX3_HUMAN	Septin-2 OS=Homo sapiens GN=SEPT2 PE=1 SV=1	HUMAN	2	tr	B5MCX3	B5MCX3_HUMAN
472	1.84	1.84	42.13	33.15	19.66	sp|O15145|ARPC3_HUMAN	Actin-related protein 2/3 complex subunit 3 OS=Homo sapiens GN=ARPC3 PE=1 SV=3	HUMAN	4	sp	O15145	ARPC3_HUMAN
474	1.83	1.83	40.58	36.23	23.19	sp|P62857|RS28_HUMAN	40S ribosomal protein S28 OS=Homo sapiens GN=RPS28 PE=1 SV=1	HUMAN	2	sp	P62857	RS28_HUMAN
478	1.79	1.79	10.38	3.341	1.432	sp|P01031|CO5_HUMAN	Complement C5 OS=Homo sapiens GN=C5 PE=1 SV=4	HUMAN	2	sp	P01031	CO5_HUMAN
483	1.73	1.73	5.506	4.263	4.263	sp|O14773|TPP1_HUMAN	Tripeptidyl-peptidase 1 OS=Homo sapiens GN=TPP1 PE=1 SV=2	HUMAN	2	sp	O14773	TPP1_HUMAN
493	1.64	2.49	11.75	8.355	4.961	sp|O95084|PRS23_HUMAN	Serine protease 23 OS=Homo sapiens GN=PRSS23 PE=1 SV=1	HUMAN	3	sp	O95084	PRS23_HUMAN
494	1.64	1.64	40.66	24.18	24.18	tr|C9J712|C9J712_HUMAN	Profilin-2 OS=Homo sapiens GN=PFN2 PE=1 SV=1	HUMAN	2	tr	C9J712	C9J712_HUMAN
495	1.61	1.62	11.54	4.751	4.751	sp|Q9BRK3|MXRA8_HUMAN	Matrix-remodeling-associated protein 8 OS=Homo sapiens GN=MXRA8 PE=2 SV=1	HUMAN	2	sp	Q9BRK3	MXRA8_HUMAN
500	1.56	1.91	20.45	3.036	3.036	sp|O95965|ITGBL_HUMAN	Integrin beta-like protein 1 OS=Homo sapiens GN=ITGBL1 PE=2 SV=1	HUMAN	2	sp	O95965	ITGBL_HUMAN
501	1.55	1.55	40.97	8.811	8.811	sp|Q92520|FAM3C_HUMAN	Protein FAM3C OS=Homo sapiens GN=FAM3C PE=1 SV=1	HUMAN	2	sp	Q92520	FAM3C_HUMAN
502	1.54	1.55	15.08	15.08	15.08	sp|P62318|SMD3_HUMAN	Small nuclear ribonucleoprotein Sm D3 OS=Homo sapiens GN=SNRPD3 PE=1 SV=1	HUMAN	2	sp	P62318	SMD3_HUMAN
509	1.49	8.09	68.42	63.82	50	sp|P15531|NDKA_HUMAN	Nucleoside diphosphate kinase A OS=Homo sapiens GN=NME1 PE=1 SV=1	HUMAN	8	sp	P15531	NDKA_HUMAN
514	1.46	6.45	19.34	17.68	16.02	sp|Q29940|1B59_HUMAN	HLA class I histocompatibility antigen, B-59 alpha chain OS=Homo sapiens GN=HLA-B PE=1 SV=1	HUMAN	4	sp	Q29940	1B59_HUMAN
526	1.35	2.12	5.876	2.308	1.679	sp|P53618|COPB_HUMAN	Coatomer subunit beta OS=Homo sapiens GN=COPB1 PE=1 SV=3	HUMAN	2	sp	P53618	COPB_HUMAN
527	1.35	1.36	27.22	9.494	9.494	tr|Q5T7C4|Q5T7C4_HUMAN	High mobility group protein B1 OS=Homo sapiens GN=HMGB1 PE=1 SV=1	HUMAN	2	tr	Q5T7C4	Q5T7C4_HUMAN
529	1.34	1.34	12.12	12.12	3.939	sp|Q9UBQ6|EXTL2_HUMAN	Exostosin-like 2 OS=Homo sapiens GN=EXTL2 PE=1 SV=1	HUMAN	2	sp	Q9UBQ6	EXTL2_HUMAN
537	1.22	1.28	10.03	3.295	3.295	tr|E7ET33|E7ET33_HUMAN	Inter-alpha-trypsin inhibitor heavy chain H3 OS=Homo sapiens GN=ITIH3 PE=1 SV=1	HUMAN	2	tr	E7ET33	E7ET33_HUMAN
542	1.17	67.6	55.2	52.1	50.5	tr|B1ALD9|B1ALD9_HUMAN	Periostin OS=Homo sapiens GN=POSTN PE=1 SV=1	HUMAN	53	tr	B1ALD9	B1ALD9_HUMAN
545	1.15	1.15	46.88	8.75	8.75	tr|J3KQJ1|J3KQJ1_HUMAN	Sulfatase-modifying factor 2 OS=Homo sapiens GN=SUMF2 PE=1 SV=1	HUMAN	2	tr	J3KQJ1	J3KQJ1_HUMAN
547	1.14	2.36	15.54	4.145	4.145	sp|Q6NVY1|HIBCH_HUMAN	3-hydroxyisobutyryl-CoA hydrolase, mitochondrial OS=Homo sapiens GN=HIBCH PE=1 SV=2	HUMAN	2	sp	Q6NVY1	HIBCH_HUMAN
551	1.12	1.58	20.65	5.119	3.754	sp|P20700|LMNB1_HUMAN	Lamin-B1 OS=Homo sapiens GN=LMNB1 PE=1 SV=2	HUMAN	2	sp	P20700	LMNB1_HUMAN
554	1.1	1.1	33.98	16.57	11.05	sp|Q9BRK5|CAB45_HUMAN	45 kDa calcium-binding protein OS=Homo sapiens GN=SDF4 PE=1 SV=1	HUMAN	3	sp	Q9BRK5	CAB45_HUMAN
557	1.08	3.4	20.44	7.32	4.972	tr|G3XAP6|G3XAP6_HUMAN	Cartilage oligomeric matrix protein OS=Homo sapiens GN=COMP PE=1 SV=1	HUMAN	2	tr	G3XAP6	G3XAP6_HUMAN
558	1.08	1.22	26.15	7.366	3.683	sp|Q99832|TCPH_HUMAN	T-complex protein 1 subunit eta OS=Homo sapiens GN=CCT7 PE=1 SV=2	HUMAN	3	sp	Q99832	TCPH_HUMAN
568	1	1.41	12.59	1.18	1.18	tr|H0YBP1|H0YBP1_HUMAN	Focal adhesion kinase 1 (Fragment) OS=Homo sapiens GN=PTK2 PE=1 SV=1	HUMAN	2	tr	H0YBP1	H0YBP1_HUMAN
571	0.97	0.97	38.37	22.67	12.21	sp|P24844|MYL9_HUMAN	Myosin regulatory light polypeptide 9 OS=Homo sapiens GN=MYL9 PE=1 SV=4	HUMAN	2	sp	P24844	MYL9_HUMAN
575	0.93	0.93	19.69	7.077	7.077	sp|Q13347|EIF3I_HUMAN	Eukaryotic translation initiation factor 3 subunit I OS=Homo sapiens GN=EIF3I PE=1 SV=1	HUMAN	2	sp	Q13347	EIF3I_HUMAN
579	0.88	41.88	22.72	17.58	13.49	sp|P24821|TENA_HUMAN	Tenascin OS=Homo sapiens GN=TNC PE=1 SV=3	HUMAN	23	sp	P24821	TENA_HUMAN
587	0.85	0.85	18.02	18.02	13.95	sp|O95881|TXD12_HUMAN	Thioredoxin domain-containing protein 12 OS=Homo sapiens GN=TXNDC12 PE=1 SV=1	HUMAN	2	sp	O95881	TXD12_HUMAN
592	0.8	0.8	27.03	18.92	13.51	sp|Q96A72|MGN2_HUMAN	Protein mago nashi homolog 2 OS=Homo sapiens GN=MAGOHB PE=1 SV=1	HUMAN	2	sp	Q96A72	MGN2_HUMAN
597	0.77	2.33	31.15	12.15	9.657	tr|F8VZX2|F8VZX2_HUMAN	Poly(rC)-binding protein 2 OS=Homo sapiens GN=PCBP2 PE=1 SV=1	HUMAN	2	tr	F8VZX2	F8VZX2_HUMAN
623	0.64	0.64	40.19	29.91	14.95	sp|P09341|GROA_HUMAN	Growth-regulated alpha protein OS=Homo sapiens GN=CXCL1 PE=1 SV=1	HUMAN	2	sp	P09341	GROA_HUMAN
628	0.59	0.59	34.53	20.86	20.86	tr|A0A087WV45|A0A087WV45_HUMAN	Transthyretin OS=Homo sapiens GN=TTR PE=1 SV=1	HUMAN	2	tr	A0A087WV45	A0A087WV45_HUMAN
630	0.57	3.09	30.65	9.217	7.834	sp|P09104|ENOG_HUMAN	Gamma-enolase OS=Homo sapiens GN=ENO2 PE=1 SV=3	HUMAN	2	sp	P09104	ENOG_HUMAN
634	0.55	0.55	41.89	14.19	14.19	tr|H3BQF1|H3BQF1_HUMAN	Adenine phosphoribosyltransferase (Fragment) OS=Homo sapiens GN=APRT PE=1 SV=4	HUMAN	2	tr	H3BQF1	H3BQF1_HUMAN
660	0.43	31.3	51.13	44.95	32.58	tr|H3BTN5|H3BTN5_HUMAN	Pyruvate kinase (Fragment) OS=Homo sapiens GN=PKM PE=1 SV=1	HUMAN	19	tr	H3BTN5	H3BTN5_HUMAN
661	0.43	1.55	21.93	9.626	9.626	sp|Q96SL4|GPX7_HUMAN	Glutathione peroxidase 7 OS=Homo sapiens GN=GPX7 PE=1 SV=1	HUMAN	2	sp	Q96SL4	GPX7_HUMAN
671	0.4	8.84	33.17	24.82	21.38	sp|Q14240|IF4A2_HUMAN	Eukaryotic initiation factor 4A-II OS=Homo sapiens GN=EIF4A2 PE=1 SV=2	HUMAN	6	sp	Q14240	IF4A2_HUMAN
680	0.36	0.36	5.734	2.721	2.041	RRRRRsp|O14709|ZN197_HUMAN	REVERSED Zinc finger protein 197 OS=Homo sapiens GN=ZNF197 PE=2 SV=1	HUMAN	2	RRRRRsp	O14709	ZN197_HUMAN
698	0.32	1.37	56.55	44.83	13.79	sp|Q15819|UB2V2_HUMAN	Ubiquitin-conjugating enzyme E2 variant 2 OS=Homo sapiens GN=UBE2V2 PE=1 SV=4	HUMAN	2	sp	Q15819	UB2V2_HUMAN
699	0.32	0.35	14.92	8.065	5.511	sp|P27658|CO8A1_HUMAN	Collagen alpha-1(VIII) chain OS=Homo sapiens GN=COL8A1 PE=1 SV=2	HUMAN	2	sp	P27658	CO8A1_HUMAN
718	0.29	0.29	53.09	53.09	30.86	tr|Q8WVC2|Q8WVC2_HUMAN	40S ribosomal protein S21 OS=Homo sapiens GN=RPS21 PE=1 SV=1	HUMAN	2	tr	Q8WVC2	Q8WVC2_HUMAN
754	0.23	45.03	42.22	23.07	19.64	tr|A0A087WXW9|A0A087WXW9_HUMAN	Collagen alpha-1(V) chain OS=Homo sapiens GN=COL5A1 PE=1 SV=1	HUMAN	38	tr	A0A087WXW9	A0A087WXW9_HUMAN
777	0.2	0.24	28.57	28.57	17.14	tr|M0QZG3|M0QZG3_HUMAN	Gamma-interferon-inducible lysosomal thiol reductase (Fragment) OS=Homo sapiens GN=IFI30 PE=1 SV=2	HUMAN	2	tr	M0QZG3	M0QZG3_HUMAN
809	0.16	15.4	49.21	31.91	26.52	sp|P68371|TBB4B_HUMAN	Tubulin beta-4B chain OS=Homo sapiens GN=TUBB4B PE=1 SV=1	HUMAN	11	sp	P68371	TBB4B_HUMAN
881	0.1	8.89	32.89	19.69	13.42	sp|P31150|GDIA_HUMAN	Rab GDP dissociation inhibitor alpha OS=Homo sapiens GN=GDI1 PE=1 SV=2	HUMAN	5	sp	P31150	GDIA_HUMAN
882	0.1	1.01	13.1	1.143	1.143	sp|Q6NV74|K121L_HUMAN	Uncharacterized protein KIAA1211-like OS=Homo sapiens GN=KIAA1211L PE=2 SV=3	HUMAN	2	sp	Q6NV74	K121L_HUMAN
900	0.09	0.76	5.929	1.68	0.9881	RRRRRsp|O75665|OFD1_HUMAN	REVERSED Oral-facial-digital syndrome 1 protein OS=Homo sapiens GN=OFD1 PE=1 SV=1	HUMAN	2	RRRRRsp	O75665	OFD1_HUMAN
922	0.08	11.88	52.17	47.34	34.3	tr|H0YAR1|H0YAR1_HUMAN	Lysyl oxidase homolog 2 (Fragment) OS=Homo sapiens GN=LOXL2 PE=1 SV=1	HUMAN	7	tr	H0YAR1	H0YAR1_HUMAN
923	0.08	11.09	33.87	11.35	9.22	sp|P04259|K2C6B_HUMAN	Keratin, type II cytoskeletal 6B OS=Homo sapiens GN=KRT6B PE=1 SV=5	HUMAN	6	sp	P04259	K2C6B_HUMAN
987	0.06	2.38	23.94	8.686	3.814	sp|P02533|K1C14_HUMAN	Keratin, type I cytoskeletal 14 OS=Homo sapiens GN=KRT14 PE=1 SV=4	HUMAN	3	sp	P02533	K1C14_HUMAN
988	0.06	2.04	44.72	22.76	6.911	sp|Q04917|1433F_HUMAN	14-3-3 protein eta OS=Homo sapiens GN=YWHAH PE=1 SV=4	HUMAN	2	sp	Q04917	1433F_HUMAN
1030	0.05	3.93	57.14	35.71	27.78	sp|Q16778|H2B2E_HUMAN	Histone H2B type 2-E OS=Homo sapiens GN=HIST2H2BE PE=1 SV=3	HUMAN	3	sp	Q16778	H2B2E_HUMAN

## Sheet: A MSC sample 150602
N	Unused	Total	%Cov	%Cov(50)	%Cov(95)	Accession	Name	Species	Peptides(95%)	Accession			Molecular Function	PANTHER ID
1	334.93	334.93	77.12	74.48	72.59	sp|P02751|FINC_HUMAN	Fibronectin OS=Homo sapiens GN=FN1 PE=1 SV=4	HUMAN	525	sp	P02751	FINC_HUMAN
2	257.07	257.07	69.08	59.26	55.57	sp|Q99715|COCA1_HUMAN	Collagen alpha-1(XII) chain OS=Homo sapiens GN=COL12A1 PE=1 SV=2	HUMAN	163	sp	Q99715	COCA1_HUMAN
3	253.49	253.49	96.78	92.39	89.53	sp|P08123|CO1A2_HUMAN	Collagen alpha-2(I) chain OS=Homo sapiens GN=COL1A2 PE=1 SV=7	HUMAN	735	sp	P08123	CO1A2_HUMAN
4	214.92	214.92	61.57	50.05	46.14	sp|P12111|CO6A3_HUMAN	Collagen alpha-3(VI) chain OS=Homo sapiens GN=COL6A3 PE=1 SV=5	HUMAN	140	sp	P12111	CO6A3_HUMAN
5	195.76	195.76	51.06	40.93	39.28	tr|E7EPZ9|E7EPZ9_HUMAN	Tenascin-X OS=Homo sapiens GN=TNXB PE=1 SV=1	HUMAN	119	tr	E7EPZ9	E7EPZ9_HUMAN
6	192.61	192.93	91.26	86.07	84.22	sp|P02452|CO1A1_HUMAN	Collagen alpha-1(I) chain OS=Homo sapiens GN=COL1A1 PE=1 SV=5	HUMAN	674	sp	P02452	CO1A1_HUMAN
7	122.79	122.79	91.63	87.34	84.76	sp|P08670|VIME_HUMAN	Vimentin OS=Homo sapiens GN=VIM PE=1 SV=4	HUMAN	110	sp	P08670	VIME_HUMAN
8	102.78	102.78	29.51	19.72	18.61	sp|P98160|PGBM_HUMAN	Basement membrane-specific heparan sulfate proteoglycan core protein OS=Homo sapiens GN=HSPG2 PE=1 SV=4	HUMAN	67	sp	P98160	PGBM_HUMAN
9	93.72	93.72	78.04	57.44	52.05	sp|P02461|CO3A1_HUMAN	Collagen alpha-1(III) chain OS=Homo sapiens GN=COL3A1 PE=1 SV=4	HUMAN	188	sp	P02461	CO3A1_HUMAN
10	90	90.02	70.1	63.4	59.45	sp|Q15063|POSTN_HUMAN	Periostin OS=Homo sapiens GN=POSTN PE=1 SV=2	HUMAN	102	sp	Q15063	POSTN_HUMAN
11	88.16	88.16	66.28	53.22	51.36	tr|A0A087X0S5|A0A087X0S5_HUMAN	Collagen alpha-1(VI) chain OS=Homo sapiens GN=COL6A1 PE=1 SV=1	HUMAN	65	tr	A0A087X0S5	A0A087X0S5_HUMAN
12	84.38	84.76	74.67	69.11	65.74	sp|Q15582|BGH3_HUMAN	Transforming growth factor-beta-induced protein ig-h3 OS=Homo sapiens GN=TGFBI PE=1 SV=1	HUMAN	113	sp	Q15582	BGH3_HUMAN
13	83.75	83.75	38.24	24.31	22.6	tr|Q60FE5|Q60FE5_HUMAN	Filamin A OS=Homo sapiens GN=FLNA PE=1 SV=1	HUMAN	43	tr	Q60FE5	Q60FE5_HUMAN
14	82.78	82.78	53.58	41.91	31.75	sp|P01024|CO3_HUMAN	Complement C3 OS=Homo sapiens GN=C3 PE=1 SV=2	HUMAN	51	sp	P01024	CO3_HUMAN
15	79.01	79.01	62.23	59.94	56.88	sp|P11021|GRP78_HUMAN	78 kDa glucose-regulated protein OS=Homo sapiens GN=HSPA5 PE=1 SV=2	HUMAN	49	sp	P11021	GRP78_HUMAN
16	76.45	77.52	64.61	62.95	54.97	sp|P02545|LMNA_HUMAN	Prelamin-A/C OS=Homo sapiens GN=LMNA PE=1 SV=1	HUMAN	44	sp	P02545	LMNA_HUMAN
17	74.9	74.9	68.39	54.48	50.78	sp|P12814|ACTN1_HUMAN	Alpha-actinin-1 OS=Homo sapiens GN=ACTN1 PE=1 SV=2	HUMAN	44	sp	P12814	ACTN1_HUMAN
18	68.8	69.88	70.45	66.67	60.76	sp|P08253|MMP2_HUMAN	72 kDa type IV collagenase OS=Homo sapiens GN=MMP2 PE=1 SV=2	HUMAN	73	sp	P08253	MMP2_HUMAN
19	68.37	68.37	88.56	87.56	87.56	sp|P05121|PAI1_HUMAN	Plasminogen activator inhibitor 1 OS=Homo sapiens GN=SERPINE1 PE=1 SV=1	HUMAN	99	sp	P05121	PAI1_HUMAN
20	67.6	67.65	47.25	29.85	26.27	tr|A0A0A0MTC7|A0A0A0MTC7_HUMAN	Laminin subunit alpha-4 OS=Homo sapiens GN=LAMA4 PE=1 SV=1	HUMAN	34	tr	A0A0A0MTC7	A0A0A0MTC7_HUMAN
21	66.02	66.02	60.61	54.73	54.73	sp|P06396|GELS_HUMAN	Gelsolin OS=Homo sapiens GN=GSN PE=1 SV=1	HUMAN	47	sp	P06396	GELS_HUMAN
22	63.11	63.11	75.13	69.6	67.84	sp|P07093|GDN_HUMAN	Glia-derived nexin OS=Homo sapiens GN=SERPINE2 PE=1 SV=1	HUMAN	60	sp	P07093	GDN_HUMAN
23	61.85	61.85	51.14	46.45	43.51	sp|O00391|QSOX1_HUMAN	Sulfhydryl oxidase 1 OS=Homo sapiens GN=QSOX1 PE=1 SV=3	HUMAN	41	sp	O00391	QSOX1_HUMAN
24	58.15	58.15	35.04	27.44	27.44	sp|P07996|TSP1_HUMAN	Thrombospondin-1 OS=Homo sapiens GN=THBS1 PE=1 SV=2	HUMAN	36	sp	P07996	TSP1_HUMAN
25	57.41	57.41	70.89	64.75	61.58	sp|P30101|PDIA3_HUMAN	Protein disulfide-isomerase A3 OS=Homo sapiens GN=PDIA3 PE=1 SV=4	HUMAN	35	sp	P30101	PDIA3_HUMAN
26	55.66	55.66	61.18	48.18	43.85	sp|P26038|MOES_HUMAN	Moesin OS=Homo sapiens GN=MSN PE=1 SV=3	HUMAN	33	sp	P26038	MOES_HUMAN
27	55.02	55.02	36.48	24.67	23.49	sp|P11047|LAMC1_HUMAN	Laminin subunit gamma-1 OS=Homo sapiens GN=LAMC1 PE=1 SV=3	HUMAN	31	sp	P11047	LAMC1_HUMAN
28	52.96	53.01	69.64	68.8	64.07	sp|P07585|PGS2_HUMAN	Decorin OS=Homo sapiens GN=DCN PE=1 SV=1	HUMAN	52	sp	P07585	PGS2_HUMAN
29	52.07	52.07	43.34	27.38	24.95	sp|Q92626|PXDN_HUMAN	Peroxidasin homolog OS=Homo sapiens GN=PXDN PE=1 SV=2	HUMAN	29	sp	Q92626	PXDN_HUMAN
30	49.41	49.41	69.38	63.88	60.29	sp|P50454|SERPH_HUMAN	Serpin H1 OS=Homo sapiens GN=SERPINH1 PE=1 SV=2	HUMAN	39	sp	P50454	SERPH_HUMAN
31	49.18	49.18	31.82	18.78	15.3	tr|G3XAI2|G3XAI2_HUMAN	Laminin subunit beta-1 OS=Homo sapiens GN=LAMB1 PE=1 SV=1	HUMAN	27	tr	G3XAI2	G3XAI2_HUMAN
32	49.01	49.01	51.94	37.92	30.25	sp|P18206|VINC_HUMAN	Vinculin OS=Homo sapiens GN=VCL PE=1 SV=4	HUMAN	29	sp	P18206	VINC_HUMAN
33	48.59	72.46	73.22	60.92	53.57	sp|O43707|ACTN4_HUMAN	Alpha-actinin-4 OS=Homo sapiens GN=ACTN4 PE=1 SV=2	HUMAN	47	sp	O43707	ACTN4_HUMAN
34	48.28	48.28	60.15	51.18	36.11	sp|P14625|ENPL_HUMAN	Endoplasmin OS=Homo sapiens GN=HSP90B1 PE=1 SV=1	HUMAN	28	sp	P14625	ENPL_HUMAN
35	47.48	47.48	52.5	31.4	28.66	sp|P12110|CO6A2_HUMAN	Collagen alpha-2(VI) chain OS=Homo sapiens GN=COL6A2 PE=1 SV=4	HUMAN	33	sp	P12110	CO6A2_HUMAN
36	46.99	47.21	73.96	62.44	60.37	sp|P06733|ENOA_HUMAN	Alpha-enolase OS=Homo sapiens GN=ENO1 PE=1 SV=2	HUMAN	29	sp	P06733	ENOA_HUMAN
37	46.81	46.81	54.65	40.26	39.39	sp|P09871|C1S_HUMAN	Complement C1s subcomponent OS=Homo sapiens GN=C1S PE=1 SV=1	HUMAN	38	sp	P09871	C1S_HUMAN
38	44.8	51.78	28.48	13.83	12.81	sp|Q14315|FLNC_HUMAN	Filamin-C OS=Homo sapiens GN=FLNC PE=1 SV=3	HUMAN	26	sp	Q14315	FLNC_HUMAN
39	44.71	44.83	65.08	56.62	50.33	sp|Q02818|NUCB1_HUMAN	Nucleobindin-1 OS=Homo sapiens GN=NUCB1 PE=1 SV=4	HUMAN	28	sp	Q02818	NUCB1_HUMAN
40	44.26	44.26	73.33	65.6	62.93	sp|P63261|ACTG_HUMAN	Actin, cytoplasmic 2 OS=Homo sapiens GN=ACTG1 PE=1 SV=1	HUMAN	41	sp	P63261	ACTG_HUMAN
41	43.6	43.6	77.51	70.33	61.48	sp|P36955|PEDF_HUMAN	Pigment epithelium-derived factor OS=Homo sapiens GN=SERPINF1 PE=1 SV=4	HUMAN	34	sp	P36955	PEDF_HUMAN
42	41.74	41.74	50.92	20.95	17.52	sp|P20908|CO5A1_HUMAN	Collagen alpha-1(V) chain OS=Homo sapiens GN=COL5A1 PE=1 SV=3	HUMAN	33	sp	P20908	CO5A1_HUMAN
43	41.67	43.32	59.01	34.01	32.14	sp|P04264|K2C1_HUMAN	Keratin, type II cytoskeletal 1 OS=Homo sapiens GN=KRT1 PE=1 SV=6	HUMAN	23	sp	P04264	K2C1_HUMAN
44	41.43	44.71	59.59	47.27	43.68	sp|P08107|HSP71_HUMAN	Heat shock 70 kDa protein 1A/1B OS=Homo sapiens GN=HSPA1A PE=1 SV=5	HUMAN	29	sp	P08107	HSP71_HUMAN
45	41.06	41.06	85.25	59.29	54.87	sp|P07355|ANXA2_HUMAN	Annexin A2 OS=Homo sapiens GN=ANXA2 PE=1 SV=2	HUMAN	27	sp	P07355	ANXA2_HUMAN
46	40.85	40.85	75.2	59.45	50.98	sp|P07237|PDIA1_HUMAN	Protein disulfide-isomerase OS=Homo sapiens GN=P4HB PE=1 SV=3	HUMAN	22	sp	P07237	PDIA1_HUMAN
47	40.82	40.85	51.99	41.19	37.34	sp|P55072|TERA_HUMAN	Transitional endoplasmic reticulum ATPase OS=Homo sapiens GN=VCP PE=1 SV=4	HUMAN	27	sp	P55072	TERA_HUMAN
48	39.69	39.69	38.12	29.07	25.34	tr|E7EUF1|E7EUF1_HUMAN	Ectonucleotide pyrophosphatase/phosphodiesterase family member 2 OS=Homo sapiens GN=ENPP2 PE=1 SV=1	HUMAN	34	tr	E7EUF1	E7EUF1_HUMAN
49	39.63	39.63	46.1	41.65	39.2	sp|P10909|CLUS_HUMAN	Clusterin OS=Homo sapiens GN=CLU PE=1 SV=1	HUMAN	35	sp	P10909	CLUS_HUMAN
50	39.35	39.35	39.68	28.63	25.47	sp|Q76M96|CCD80_HUMAN	Coiled-coil domain-containing protein 80 OS=Homo sapiens GN=CCDC80 PE=1 SV=1	HUMAN	21	sp	Q76M96	CCD80_HUMAN
51	39.33	39.33	63.47	48.59	45.76	sp|P14618|KPYM_HUMAN	Pyruvate kinase PKM OS=Homo sapiens GN=PKM PE=1 SV=4	HUMAN	24	sp	P14618	KPYM_HUMAN
52	38.11	38.16	44.4	36.89	32.24	sp|P07900|HS90A_HUMAN	Heat shock protein HSP 90-alpha OS=Homo sapiens GN=HSP90AA1 PE=1 SV=5	HUMAN	24	sp	P07900	HS90A_HUMAN
53	37.78	37.78	21.46	13.38	11.6	sp|P35555|FBN1_HUMAN	Fibrillin-1 OS=Homo sapiens GN=FBN1 PE=1 SV=3	HUMAN	38	sp	P35555	FBN1_HUMAN
54	36.85	36.85	67.34	64.52	55.65	sp|P67936|TPM4_HUMAN	Tropomyosin alpha-4 chain OS=Homo sapiens GN=TPM4 PE=1 SV=3	HUMAN	21	sp	P67936	TPM4_HUMAN
55	36.08	38.43	38.38	15.46	13.74	sp|P55268|LAMB2_HUMAN	Laminin subunit beta-2 OS=Homo sapiens GN=LAMB2 PE=1 SV=2	HUMAN	21	sp	P55268	LAMB2_HUMAN
56	35.02	35.02	69.88	61.14	44.58	sp|P00338|LDHA_HUMAN	L-lactate dehydrogenase A chain OS=Homo sapiens GN=LDHA PE=1 SV=2	HUMAN	21	sp	P00338	LDHA_HUMAN
57	33.8	33.8	32.15	22.98	20.44	sp|P53396|ACLY_HUMAN	ATP-citrate synthase OS=Homo sapiens GN=ACLY PE=1 SV=3	HUMAN	18	sp	P53396	ACLY_HUMAN
58	33.63	33.63	61.68	48.37	44.02	tr|J3KPS3|J3KPS3_HUMAN	Fructose-bisphosphate aldolase OS=Homo sapiens GN=ALDOA PE=1 SV=1	HUMAN	21	tr	J3KPS3	J3KPS3_HUMAN
59	33.4	45.11	68.42	50.15	46.44	sp|P11142|HSP7C_HUMAN	Heat shock cognate 71 kDa protein OS=Homo sapiens GN=HSPA8 PE=1 SV=1	HUMAN	33	sp	P11142	HSP7C_HUMAN
60	32.61	32.64	61.42	59.84	57.48	sp|P26022|PTX3_HUMAN	Pentraxin-related protein PTX3 OS=Homo sapiens GN=PTX3 PE=1 SV=3	HUMAN	57	sp	P26022	PTX3_HUMAN
61	31.88	31.9	52.91	40.92	35.1	sp|P13645|K1C10_HUMAN	Keratin, type I cytoskeletal 10 OS=Homo sapiens GN=KRT10 PE=1 SV=6	HUMAN	18	sp	P13645	K1C10_HUMAN
62	30.88	30.88	50.35	30.46	27.4	tr|B4DPQ0|B4DPQ0_HUMAN	Complement C1r subcomponent OS=Homo sapiens GN=C1R PE=1 SV=1	HUMAN	27	tr	B4DPQ0	B4DPQ0_HUMAN
63	30.59	30.59	75.93	75.93	67.59	sp|P23284|PPIB_HUMAN	Peptidyl-prolyl cis-trans isomerase B OS=Homo sapiens GN=PPIB PE=1 SV=2	HUMAN	33	sp	P23284	PPIB_HUMAN
64	29.58	29.58	42.05	30.26	25.64	sp|Q08380|LG3BP_HUMAN	Galectin-3-binding protein OS=Homo sapiens GN=LGALS3BP PE=1 SV=1	HUMAN	16	sp	Q08380	LG3BP_HUMAN
65	29.37	29.37	45.53	37	28.61	sp|Q02809|PLOD1_HUMAN	Procollagen-lysine,2-oxoglutarate 5-dioxygenase 1 OS=Homo sapiens GN=PLOD1 PE=1 SV=2	HUMAN	16	sp	Q02809	PLOD1_HUMAN
66	28.71	28.71	20.62	15.67	13.36	sp|P01023|A2MG_HUMAN	Alpha-2-macroglobulin OS=Homo sapiens GN=A2M PE=1 SV=3	HUMAN	30	sp	P01023	A2MG_HUMAN
67	28.59	28.59	50.88	43.66	40.77	sp|P29401|TKT_HUMAN	Transketolase OS=Homo sapiens GN=TKT PE=1 SV=3	HUMAN	19	sp	P29401	TKT_HUMAN
68	28.15	28.15	57.27	44.77	43.41	sp|Q15084|PDIA6_HUMAN	Protein disulfide-isomerase A6 OS=Homo sapiens GN=PDIA6 PE=1 SV=1	HUMAN	16	sp	Q15084	PDIA6_HUMAN
69	27.26	27.26	59.86	53.99	46.01	tr|Q5JP53|Q5JP53_HUMAN	Tubulin beta chain OS=Homo sapiens GN=TUBB PE=1 SV=1	HUMAN	19	tr	Q5JP53	Q5JP53_HUMAN
70	27.04	27.91	37.19	33	33	sp|Q9NRN5|OLFL3_HUMAN	Olfactomedin-like protein 3 OS=Homo sapiens GN=OLFML3 PE=2 SV=1	HUMAN	19	sp	Q9NRN5	OLFL3_HUMAN
71	26.97	30.53	24.53	10.88	10.05	tr|E7EN95|E7EN95_HUMAN	Filamin-B OS=Homo sapiens GN=FLNB PE=1 SV=1	HUMAN	17	tr	E7EN95	E7EN95_HUMAN
72	26.5	26.5	34.8	31.4	27.6	sp|P05155|IC1_HUMAN	Plasma protease C1 inhibitor OS=Homo sapiens GN=SERPING1 PE=1 SV=2	HUMAN	17	sp	P05155	IC1_HUMAN
73	26.32	26.34	39.39	29.95	21.79	sp|P13639|EF2_HUMAN	Elongation factor 2 OS=Homo sapiens GN=EEF2 PE=1 SV=4	HUMAN	15	sp	P13639	EF2_HUMAN
74	26.21	26.21	54.77	52.26	52.26	sp|Q06830|PRDX1_HUMAN	Peroxiredoxin-1 OS=Homo sapiens GN=PRDX1 PE=1 SV=1	HUMAN	22	sp	Q06830	PRDX1_HUMAN
75	25.97	25.97	16.09	10.52	9.342	tr|D3YTG3|D3YTG3_HUMAN	Target of Nesh-SH3 OS=Homo sapiens GN=ABI3BP PE=1 SV=1	HUMAN	16	tr	D3YTG3	D3YTG3_HUMAN
76	25.81	25.81	46.23	23.9	23.04	sp|P23142|FBLN1_HUMAN	Fibulin-1 OS=Homo sapiens GN=FBLN1 PE=1 SV=4	HUMAN	21	sp	P23142	FBLN1_HUMAN
77	25.7	26.75	45.12	30.54	24.65	sp|P13667|PDIA4_HUMAN	Protein disulfide-isomerase A4 OS=Homo sapiens GN=PDIA4 PE=1 SV=2	HUMAN	15	sp	P13667	PDIA4_HUMAN
78	25.52	25.71	57.42	37.96	36.42	tr|F5H5D3|F5H5D3_HUMAN	Tubulin alpha-1C chain OS=Homo sapiens GN=TUBA1C PE=1 SV=1	HUMAN	14	tr	F5H5D3	F5H5D3_HUMAN
79	25.34	25.34	55.62	38.46	36.39	sp|P51884|LUM_HUMAN	Lumican OS=Homo sapiens GN=LUM PE=1 SV=2	HUMAN	19	sp	P51884	LUM_HUMAN
80	24.81	24.84	46.14	19.21	18.23	sp|P02768|ALBU_HUMAN	Serum albumin OS=Homo sapiens GN=ALB PE=1 SV=2	HUMAN	28	sp	P02768	ALBU_HUMAN
81	24.66	24.66	20.86	13.4	11.64	tr|G3V511|G3V511_HUMAN	Latent-transforming growth factor beta-binding protein 2 OS=Homo sapiens GN=LTBP2 PE=1 SV=1	HUMAN	15	tr	G3V511	G3V511_HUMAN
82	24.63	27.22	24.53	5.807	3.629	sp|Q15149|PLEC_HUMAN	Plectin OS=Homo sapiens GN=PLEC PE=1 SV=3	HUMAN	15	sp	Q15149	PLEC_HUMAN
83	24.52	24.52	56.72	42.43	34.33	sp|P03956|MMP1_HUMAN	Interstitial collagenase OS=Homo sapiens GN=MMP1 PE=1 SV=3	HUMAN	14	sp	P03956	MMP1_HUMAN
84	24.47	24.47	64.09	51.82	45	sp|P16035|TIMP2_HUMAN	Metalloproteinase inhibitor 2 OS=Homo sapiens GN=TIMP2 PE=1 SV=2	HUMAN	17	sp	P16035	TIMP2_HUMAN
85	24.28	24.93	44.89	33.63	31.08	sp|O75326|SEM7A_HUMAN	Semaphorin-7A OS=Homo sapiens GN=SEMA7A PE=1 SV=1	HUMAN	15	sp	O75326	SEM7A_HUMAN
86	24.26	24.26	65.75	65.75	64.04	tr|Q32Q12|Q32Q12_HUMAN	Nucleoside diphosphate kinase OS=Homo sapiens GN=NME1-NME2 PE=1 SV=1	HUMAN	17	tr	Q32Q12	Q32Q12_HUMAN
87	24.05	24.05	36.06	24.23	23.24	sp|P19338|NUCL_HUMAN	Nucleolin OS=Homo sapiens GN=NCL PE=1 SV=3	HUMAN	14	sp	P19338	NUCL_HUMAN
88	23.95	23.95	60.14	42.66	41.26	sp|Q16555|DPYL2_HUMAN	Dihydropyrimidinase-related protein 2 OS=Homo sapiens GN=DPYSL2 PE=1 SV=1	HUMAN	15	sp	Q16555	DPYL2_HUMAN
89	23.9	23.9	57.24	45.43	42.76	sp|Q15113|PCOC1_HUMAN	Procollagen C-endopeptidase enhancer 1 OS=Homo sapiens GN=PCOLCE PE=1 SV=2	HUMAN	18	sp	Q15113	PCOC1_HUMAN
90	23.39	23.71	56.35	48.68	46.52	sp|P28300|LYOX_HUMAN	Protein-lysine 6-oxidase OS=Homo sapiens GN=LOX PE=1 SV=2	HUMAN	16	sp	P28300	LYOX_HUMAN
91	23.28	23.39	36.82	26.87	25.84	sp|Q9Y4K0|LOXL2_HUMAN	Lysyl oxidase homolog 2 OS=Homo sapiens GN=LOXL2 PE=1 SV=1	HUMAN	17	sp	Q9Y4K0	LOXL2_HUMAN
92	23.26	23.26	43.52	42.59	35.56	sp|Q16610|ECM1_HUMAN	Extracellular matrix protein 1 OS=Homo sapiens GN=ECM1 PE=1 SV=2	HUMAN	21	sp	Q16610	ECM1_HUMAN
93	22.87	22.87	48.54	43.37	33.71	sp|P50395|GDIB_HUMAN	Rab GDP dissociation inhibitor beta OS=Homo sapiens GN=GDI2 PE=1 SV=2	HUMAN	14	sp	P50395	GDIB_HUMAN
94	22.85	22.85	77.75	48.84	44.51	sp|P04083|ANXA1_HUMAN	Annexin A1 OS=Homo sapiens GN=ANXA1 PE=1 SV=2	HUMAN	13	sp	P04083	ANXA1_HUMAN
95	22.82	27.15	34.81	17.49	15.78	sp|P35442|TSP2_HUMAN	Thrombospondin-2 OS=Homo sapiens GN=THBS2 PE=1 SV=2	HUMAN	15	sp	P35442	TSP2_HUMAN
96	22.69	22.69	62.32	43.91	36.26	sp|P22626|ROA2_HUMAN	Heterogeneous nuclear ribonucleoproteins A2/B1 OS=Homo sapiens GN=HNRNPA2B1 PE=1 SV=2	HUMAN	16	sp	P22626	ROA2_HUMAN
97	22.66	22.69	22.94	11.87	10.21	sp|P0C0L4|CO4A_HUMAN	Complement C4-A OS=Homo sapiens GN=C4A PE=1 SV=2	HUMAN	16	sp	P0C0L4	CO4A_HUMAN
98	22.33	25.16	57.57	20.28	14.34	sp|P05997|CO5A2_HUMAN	Collagen alpha-2(V) chain OS=Homo sapiens GN=COL5A2 PE=1 SV=3	HUMAN	22	sp	P05997	CO5A2_HUMAN
99	21.43	21.43	33.1	20.88	17.67	sp|P11216|PYGB_HUMAN	Glycogen phosphorylase, brain form OS=Homo sapiens GN=PYGB PE=1 SV=5	HUMAN	11	sp	P11216	PYGB_HUMAN
100	21.26	21.26	32.7	17.71	11.44	sp|P02765|FETUA_HUMAN	Alpha-2-HS-glycoprotein OS=Homo sapiens GN=AHSG PE=1 SV=1	HUMAN	30	sp	P02765	FETUA_HUMAN
101	20.83	22.92	40.55	26.42	23.78	sp|P49747|COMP_HUMAN	Cartilage oligomeric matrix protein OS=Homo sapiens GN=COMP PE=1 SV=2	HUMAN	17	sp	P49747	COMP_HUMAN
102	20.58	20.58	42.14	34.38	30.82	sp|P08254|MMP3_HUMAN	Stromelysin-1 OS=Homo sapiens GN=MMP3 PE=1 SV=2	HUMAN	14	sp	P08254	MMP3_HUMAN
103	20.16	20.3	46.23	37.72	33.55	sp|P35527|K1C9_HUMAN	Keratin, type I cytoskeletal 9 OS=Homo sapiens GN=KRT9 PE=1 SV=3	HUMAN	10	sp	P35527	K1C9_HUMAN
104	19.97	19.98	20.2	5.368	4.311	tr|A0A087WUZ3|A0A087WUZ3_HUMAN	Spectrin beta chain, non-erythrocytic 1 OS=Homo sapiens GN=SPTBN1 PE=1 SV=1	HUMAN	10	tr	A0A087WUZ3	A0A087WUZ3_HUMAN
105	19.93	19.93	34.48	29.21	20.69	sp|Q12805|FBLN3_HUMAN	EGF-containing fibulin-like extracellular matrix protein 1 OS=Homo sapiens GN=EFEMP1 PE=1 SV=2	HUMAN	27	sp	Q12805	FBLN3_HUMAN
106	19.89	19.93	46.98	31.59	26.67	sp|P13797|PLST_HUMAN	Plastin-3 OS=Homo sapiens GN=PLS3 PE=1 SV=4	HUMAN	13	sp	P13797	PLST_HUMAN
107	19.59	19.59	77.61	73.13	58.71	sp|Q01995|TAGL_HUMAN	Transgelin OS=Homo sapiens GN=TAGLN PE=1 SV=4	HUMAN	15	sp	Q01995	TAGL_HUMAN
108	19.08	19.08	28.76	8.252	6.715	sp|Q13813|SPTN1_HUMAN	Spectrin alpha chain, non-erythrocytic 1 OS=Homo sapiens GN=SPTAN1 PE=1 SV=3	HUMAN	10	sp	Q13813	SPTN1_HUMAN
109	18.92	18.92	44.59	41.34	36.15	sp|P68104|EF1A1_HUMAN	Elongation factor 1-alpha 1 OS=Homo sapiens GN=EEF1A1 PE=1 SV=1	HUMAN	18	sp	P68104	EF1A1_HUMAN
110	18.17	18.17	29.45	18.22	15.25	sp|Q14697|GANAB_HUMAN	Neutral alpha-glucosidase AB OS=Homo sapiens GN=GANAB PE=1 SV=3	HUMAN	10	sp	Q14697	GANAB_HUMAN
111	18.1	18.1	27.12	18.76	14.98	sp|O94985|CSTN1_HUMAN	Calsyntenin-1 OS=Homo sapiens GN=CLSTN1 PE=1 SV=1	HUMAN	11	sp	O94985	CSTN1_HUMAN
112	18	20.74	57.65	41.04	41.04	tr|F8W6I7|F8W6I7_HUMAN	Heterogeneous nuclear ribonucleoprotein A1 OS=Homo sapiens GN=HNRNPA1 PE=1 SV=2	HUMAN	13	tr	F8W6I7	F8W6I7_HUMAN
113	17.98	17.98	66.52	52.23	44.2	sp|P30041|PRDX6_HUMAN	Peroxiredoxin-6 OS=Homo sapiens GN=PRDX6 PE=1 SV=3	HUMAN	11	sp	P30041	PRDX6_HUMAN
114	17.98	17.98	68.78	68.78	58.54	sp|P04792|HSPB1_HUMAN	Heat shock protein beta-1 OS=Homo sapiens GN=HSPB1 PE=1 SV=2	HUMAN	11	sp	P04792	HSPB1_HUMAN
115	17.92	17.92	41.46	29.79	28.13	sp|Q92743|HTRA1_HUMAN	Serine protease HTRA1 OS=Homo sapiens GN=HTRA1 PE=1 SV=1	HUMAN	10	sp	Q92743	HTRA1_HUMAN
116	17.72	31.44	78.45	53.45	42.24	tr|Q5HYB6|Q5HYB6_HUMAN	Epididymis luminal protein 189 OS=Homo sapiens GN=DKFZp686J1372 PE=1 SV=1	HUMAN	17	tr	Q5HYB6	Q5HYB6_HUMAN
117	17.71	18.61	40.38	29.13	21	sp|O60568|PLOD3_HUMAN	Procollagen-lysine,2-oxoglutarate 5-dioxygenase 3 OS=Homo sapiens GN=PLOD3 PE=1 SV=1	HUMAN	10	sp	O60568	PLOD3_HUMAN
118	17.51	17.53	22.09	8.214	7.551	sp|P35579|MYH9_HUMAN	Myosin-9 OS=Homo sapiens GN=MYH9 PE=1 SV=4	HUMAN	10	sp	P35579	MYH9_HUMAN
119	17.46	17.46	48.61	32.82	32.82	tr|A0A0A6YY95|A0A0A6YY95_HUMAN	C-type lectin domain family 11 member A OS=Homo sapiens GN=CLEC11A PE=1 SV=1	HUMAN	11	tr	A0A0A6YY95	A0A0A6YY95_HUMAN
120	17.36	17.38	22.72	12.84	9.375	sp|P98095|FBLN2_HUMAN	Fibulin-2 OS=Homo sapiens GN=FBLN2 PE=1 SV=2	HUMAN	9	sp	P98095	FBLN2_HUMAN
121	17.23	17.25	47.78	35.25	35.25	sp|P36222|CH3L1_HUMAN	Chitinase-3-like protein 1 OS=Homo sapiens GN=CHI3L1 PE=1 SV=2	HUMAN	12	sp	P36222	CH3L1_HUMAN
122	16.85	16.85	28.63	14.68	14.68	sp|P14543|NID1_HUMAN	Nidogen-1 OS=Homo sapiens GN=NID1 PE=1 SV=3	HUMAN	9	sp	P14543	NID1_HUMAN
123	16.8	16.8	33.41	19.34	14.18	sp|Q7KZF4|SND1_HUMAN	Staphylococcal nuclease domain-containing protein 1 OS=Homo sapiens GN=SND1 PE=1 SV=1	HUMAN	9	sp	Q7KZF4	SND1_HUMAN
124	16.54	16.54	66.85	51.1	38.67	sp|Q9BRK5|CAB45_HUMAN	45 kDa calcium-binding protein OS=Homo sapiens GN=SDF4 PE=1 SV=1	HUMAN	11	sp	Q9BRK5	CAB45_HUMAN
125	16.44	16.44	52.78	39.81	33.1	sp|Q8NBS9|TXND5_HUMAN	Thioredoxin domain-containing protein 5 OS=Homo sapiens GN=TXNDC5 PE=1 SV=2	HUMAN	10	sp	Q8NBS9	TXND5_HUMAN
126	16.36	16.36	19.8	4.997	3.395	sp|P24043|LAMA2_HUMAN	Laminin subunit alpha-2 OS=Homo sapiens GN=LAMA2 PE=1 SV=4	HUMAN	8	sp	P24043	LAMA2_HUMAN
127	16.34	16.34	66.53	59.27	53.23	sp|O14818|PSA7_HUMAN	Proteasome subunit alpha type-7 OS=Homo sapiens GN=PSMA7 PE=1 SV=1	HUMAN	10	sp	O14818	PSA7_HUMAN
128	16.16	16.16	79.71	77.78	58.45	sp|P01033|TIMP1_HUMAN	Metalloproteinase inhibitor 1 OS=Homo sapiens GN=TIMP1 PE=1 SV=1	HUMAN	35	sp	P01033	TIMP1_HUMAN
129	15.92	15.92	54.46	39.44	30.52	sp|P08476|INHBA_HUMAN	Inhibin beta A chain OS=Homo sapiens GN=INHBA PE=1 SV=2	HUMAN	12	sp	P08476	INHBA_HUMAN
130	15.58	15.58	52.14	49.57	44.44	sp|P25787|PSA2_HUMAN	Proteasome subunit alpha type-2 OS=Homo sapiens GN=PSMA2 PE=1 SV=2	HUMAN	9	sp	P25787	PSA2_HUMAN
131	15.39	15.39	42.09	28.78	17.99	sp|P07686|HEXB_HUMAN	Beta-hexosaminidase subunit beta OS=Homo sapiens GN=HEXB PE=1 SV=3	HUMAN	7	sp	P07686	HEXB_HUMAN
132	15.33	15.33	47.45	32.15	32.15	tr|E7ENM0|E7ENM0_HUMAN	Elastin OS=Homo sapiens GN=ELN PE=1 SV=1	HUMAN	9	tr	E7ENM0	E7ENM0_HUMAN
133	15.13	17.35	42.93	39.95	32.61	sp|P21810|PGS1_HUMAN	Biglycan OS=Homo sapiens GN=BGN PE=1 SV=2	HUMAN	12	sp	P21810	PGS1_HUMAN
134	15.12	15.14	54.77	45.64	45.64	sp|P20618|PSB1_HUMAN	Proteasome subunit beta type-1 OS=Homo sapiens GN=PSMB1 PE=1 SV=2	HUMAN	11	sp	P20618	PSB1_HUMAN
135	15.1	15.1	26.01	18.5	17.05	sp|Q8NBP7|PCSK9_HUMAN	Proprotein convertase subtilisin/kexin type 9 OS=Homo sapiens GN=PCSK9 PE=1 SV=3	HUMAN	10	sp	Q8NBP7	PCSK9_HUMAN
136	15.07	15.08	36.91	20.59	14.85	tr|A0A087WXE9|A0A087WXE9_HUMAN	Inactive serine protease PAMR1 OS=Homo sapiens GN=PAMR1 PE=1 SV=1	HUMAN	9	tr	A0A087WXE9	A0A087WXE9_HUMAN
137	15.05	15.05	56.27	35.28	32.65	tr|F5GZN3|F5GZN3_HUMAN	Lactadherin OS=Homo sapiens GN=MFGE8 PE=1 SV=1	HUMAN	10	tr	F5GZN3	F5GZN3_HUMAN
138	15.04	15.86	20.8	18.72	17.68	sp|Q6EMK4|VASN_HUMAN	Vasorin OS=Homo sapiens GN=VASN PE=1 SV=1	HUMAN	9	sp	Q6EMK4	VASN_HUMAN
139	14.87	15.05	21.56	10.03	7.899	tr|B4E1Z4|B4E1Z4_HUMAN	Uncharacterized protein OS=Homo sapiens PE=2 SV=1	HUMAN	10	tr	B4E1Z4	B4E1Z4_HUMAN
140	14.72	14.72	35.72	21.38	17.59	sp|P41250|SYG_HUMAN	Glycine--tRNA ligase OS=Homo sapiens GN=GARS PE=1 SV=3	HUMAN	11	sp	P41250	SYG_HUMAN
141	14.46	14.46	65.85	50	43.5	tr|E7EX29|E7EX29_HUMAN	14-3-3 protein zeta/delta (Fragment) OS=Homo sapiens GN=YWHAZ PE=1 SV=1	HUMAN	9	tr	E7EX29	E7EX29_HUMAN
142	14.42	14.42	28.87	18.38	14.6	sp|Q96AY3|FKB10_HUMAN	Peptidyl-prolyl cis-trans isomerase FKBP10 OS=Homo sapiens GN=FKBP10 PE=1 SV=1	HUMAN	7	sp	Q96AY3	FKB10_HUMAN
143	14.16	14.16	67.16	50.98	41.67	tr|E9PK25|E9PK25_HUMAN	Cofilin-1 OS=Homo sapiens GN=CFL1 PE=1 SV=1	HUMAN	8	tr	E9PK25	E9PK25_HUMAN
144	14.12	14.12	44.98	37.8	30.86	sp|P61158|ARP3_HUMAN	Actin-related protein 3 OS=Homo sapiens GN=ACTR3 PE=1 SV=3	HUMAN	11	sp	P61158	ARP3_HUMAN
145	13.97	13.97	55.51	47.91	30.42	sp|P28074|PSB5_HUMAN	Proteasome subunit beta type-5 OS=Homo sapiens GN=PSMB5 PE=1 SV=3	HUMAN	8	sp	P28074	PSB5_HUMAN
146	13.96	13.96	61.19	49.55	33.43	sp|P04406|G3P_HUMAN	Glyceraldehyde-3-phosphate dehydrogenase OS=Homo sapiens GN=GAPDH PE=1 SV=3	HUMAN	11	sp	P04406	G3P_HUMAN
147	13.86	30.65	69.72	57.39	45.07	tr|Q5TCU3|Q5TCU3_HUMAN	Tropomyosin beta chain OS=Homo sapiens GN=TPM2 PE=1 SV=1	HUMAN	15	tr	Q5TCU3	Q5TCU3_HUMAN
148	13.72	13.72	64.57	57.09	48.03	sp|P18669|PGAM1_HUMAN	Phosphoglycerate mutase 1 OS=Homo sapiens GN=PGAM1 PE=1 SV=2	HUMAN	8	sp	P18669	PGAM1_HUMAN
149	13.57	13.65	61.69	42.86	37.34	sp|Q12841|FSTL1_HUMAN	Follistatin-related protein 1 OS=Homo sapiens GN=FSTL1 PE=1 SV=1	HUMAN	20	sp	Q12841	FSTL1_HUMAN
150	13.54	13.54	37.73	32.23	32.23	sp|Q86UD1|OAF_HUMAN	Out at first protein homolog OS=Homo sapiens GN=OAF PE=2 SV=1	HUMAN	7	sp	Q86UD1	OAF_HUMAN
151	13.5	13.5	47	34.38	32.49	sp|P05388|RLA0_HUMAN	60S acidic ribosomal protein P0 OS=Homo sapiens GN=RPLP0 PE=1 SV=1	HUMAN	7	sp	P05388	RLA0_HUMAN
152	13.48	13.48	26.17	11.23	9.931	sp|Q8IUX7|AEBP1_HUMAN	Adipocyte enhancer-binding protein 1 OS=Homo sapiens GN=AEBP1 PE=1 SV=1	HUMAN	8	sp	Q8IUX7	AEBP1_HUMAN
153	13.47	13.47	28.22	19.63	14.39	tr|K7ELL7|K7ELL7_HUMAN	Glucosidase 2 subunit beta OS=Homo sapiens GN=PRKCSH PE=1 SV=1	HUMAN	7	tr	K7ELL7	K7ELL7_HUMAN
154	13.33	13.33	33.16	23.91	20.77	sp|P10809|CH60_HUMAN	60 kDa heat shock protein, mitochondrial OS=Homo sapiens GN=HSPD1 PE=1 SV=2	HUMAN	10	sp	P10809	CH60_HUMAN
155	13.23	15.4	60.1	37.37	33.84	sp|P32119|PRDX2_HUMAN	Peroxiredoxin-2 OS=Homo sapiens GN=PRDX2 PE=1 SV=5	HUMAN	11	sp	P32119	PRDX2_HUMAN
156	13.21	13.21	55.03	35.8	32.25	sp|P40926|MDHM_HUMAN	Malate dehydrogenase, mitochondrial OS=Homo sapiens GN=MDH2 PE=1 SV=3	HUMAN	9	sp	P40926	MDHM_HUMAN
157	13.17	13.25	30.66	20.03	17.72	sp|Q16643|DREB_HUMAN	Drebrin OS=Homo sapiens GN=DBN1 PE=1 SV=4	HUMAN	7	sp	Q16643	DREB_HUMAN
158	13.13	13.13	47.71	30.86	25.43	sp|O75787|RENR_HUMAN	Renin receptor OS=Homo sapiens GN=ATP6AP2 PE=1 SV=2	HUMAN	8	sp	O75787	RENR_HUMAN
159	12.99	12.99	52.06	45.71	37.14	sp|O43852|CALU_HUMAN	Calumenin OS=Homo sapiens GN=CALU PE=1 SV=2	HUMAN	8	sp	O43852	CALU_HUMAN
160	12.93	12.93	69.9	57.28	52.43	sp|P62805|H4_HUMAN	Histone H4 OS=Homo sapiens GN=HIST1H4A PE=1 SV=2	HUMAN	10	sp	P62805	H4_HUMAN
161	12.76	13.01	35.99	25.86	20.69	sp|P78539|SRPX_HUMAN	Sushi repeat-containing protein SRPX OS=Homo sapiens GN=SRPX PE=1 SV=1	HUMAN	7	sp	P78539	SRPX_HUMAN
162	12.7	25.12	47.16	22.33	19.83	tr|B1AHL2|B1AHL2_HUMAN	Fibulin-1 OS=Homo sapiens GN=FBLN1 PE=1 SV=1	HUMAN	18	tr	B1AHL2	B1AHL2_HUMAN
163	12.66	12.66	65	57.86	57.86	sp|P07737|PROF1_HUMAN	Profilin-1 OS=Homo sapiens GN=PFN1 PE=1 SV=2	HUMAN	10	sp	P07737	PROF1_HUMAN
164	12.57	12.83	47.56	35.37	33.84	sp|Q96D15|RCN3_HUMAN	Reticulocalbin-3 OS=Homo sapiens GN=RCN3 PE=1 SV=1	HUMAN	9	sp	Q96D15	RCN3_HUMAN
165	12.54	12.57	50.15	28.7	26.28	sp|Q15293|RCN1_HUMAN	Reticulocalbin-1 OS=Homo sapiens GN=RCN1 PE=1 SV=1	HUMAN	8	sp	Q15293	RCN1_HUMAN
166	12.52	12.52	50.54	37.63	30.11	tr|I3L504|I3L504_HUMAN	Eukaryotic translation initiation factor 5A-1 OS=Homo sapiens GN=EIF5A PE=1 SV=1	HUMAN	7	tr	I3L504	I3L504_HUMAN
167	12.37	12.37	34.98	22.41	22.41	sp|P60842|IF4A1_HUMAN	Eukaryotic initiation factor 4A-I OS=Homo sapiens GN=EIF4A1 PE=1 SV=1	HUMAN	8	sp	P60842	IF4A1_HUMAN
168	12.2	12.2	26.96	11.63	5.603	sp|P19823|ITIH2_HUMAN	Inter-alpha-trypsin inhibitor heavy chain H2 OS=Homo sapiens GN=ITIH2 PE=1 SV=2	HUMAN	6	sp	P19823	ITIH2_HUMAN
169	12.1	12.11	24.09	13.93	12.4	sp|Q93063|EXT2_HUMAN	Exostosin-2 OS=Homo sapiens GN=EXT2 PE=1 SV=1	HUMAN	7	sp	Q93063	EXT2_HUMAN
170	12.1	12.1	34.74	29.91	24.47	sp|Q9BUD6|SPON2_HUMAN	Spondin-2 OS=Homo sapiens GN=SPON2 PE=1 SV=3	HUMAN	8	sp	Q9BUD6	SPON2_HUMAN
171	12.03	12.03	66.83	57.29	50.25	sp|P37802|TAGL2_HUMAN	Transgelin-2 OS=Homo sapiens GN=TAGLN2 PE=1 SV=3	HUMAN	13	sp	P37802	TAGL2_HUMAN
172	11.99	12	53.75	36.88	27.81	sp|P08758|ANXA5_HUMAN	Annexin A5 OS=Homo sapiens GN=ANXA5 PE=1 SV=2	HUMAN	8	sp	P08758	ANXA5_HUMAN
173	11.98	11.98	31.56	29.79	27.43	sp|P07858|CATB_HUMAN	Cathepsin B OS=Homo sapiens GN=CTSB PE=1 SV=3	HUMAN	11	sp	P07858	CATB_HUMAN
174	11.87	36.1	43.37	38.12	30.66	sp|P08238|HS90B_HUMAN	Heat shock protein HSP 90-beta OS=Homo sapiens GN=HSP90AB1 PE=1 SV=4	HUMAN	22	sp	P08238	HS90B_HUMAN
175	11.78	11.78	69.31	69.31	48.68	sp|Q99497|PARK7_HUMAN	Protein deglycase DJ-1 OS=Homo sapiens GN=PARK7 PE=1 SV=2	HUMAN	7	sp	Q99497	PARK7_HUMAN
176	11.5	11.5	31.75	12	12	sp|P15144|AMPN_HUMAN	Aminopeptidase N OS=Homo sapiens GN=ANPEP PE=1 SV=4	HUMAN	7	sp	P15144	AMPN_HUMAN
177	11.4	11.4	25.4	21.94	17.78	sp|Q99538|LGMN_HUMAN	Legumain OS=Homo sapiens GN=LGMN PE=1 SV=1	HUMAN	8	sp	Q99538	LGMN_HUMAN
178	11.38	11.44	23.78	8.945	8.945	sp|Q14112|NID2_HUMAN	Nidogen-2 OS=Homo sapiens GN=NID2 PE=1 SV=3	HUMAN	6	sp	Q14112	NID2_HUMAN
179	11.37	11.5	40.42	33.23	23.65	sp|P07195|LDHB_HUMAN	L-lactate dehydrogenase B chain OS=Homo sapiens GN=LDHB PE=1 SV=2	HUMAN	7	sp	P07195	LDHB_HUMAN
180	11.35	11.35	36.68	32.41	24.37	sp|P15291|B4GT1_HUMAN	Beta-1,4-galactosyltransferase 1 OS=Homo sapiens GN=B4GALT1 PE=1 SV=5	HUMAN	7	sp	P15291	B4GT1_HUMAN
181	11.26	11.26	57.89	42.94	24.1	sp|Q15019|SEPT2_HUMAN	Septin-2 OS=Homo sapiens GN=SEPT2 PE=1 SV=1	HUMAN	6	sp	Q15019	SEPT2_HUMAN
182	11.14	14.18	43.57	25	21.43	tr|V9HW75|V9HW75_HUMAN	Epididymis secretory protein Li 109 OS=Homo sapiens GN=HEL-S-109 PE=1 SV=1	HUMAN	9	tr	V9HW75	V9HW75_HUMAN
183	11.11	11.11	40.39	24.41	18.14	sp|P61978|HNRPK_HUMAN	Heterogeneous nuclear ribonucleoprotein K OS=Homo sapiens GN=HNRNPK PE=1 SV=1	HUMAN	5	sp	P61978	HNRPK_HUMAN
184	11.01	11.01	29.36	17.78	15.66	sp|Q7Z5L7|PODN_HUMAN	Podocan OS=Homo sapiens GN=PODN PE=1 SV=2	HUMAN	7	sp	Q7Z5L7	PODN_HUMAN
185	11	11	29.2	12.41	12.41	sp|P50990|TCPQ_HUMAN	T-complex protein 1 subunit theta OS=Homo sapiens GN=CCT8 PE=1 SV=4	HUMAN	6	sp	P50990	TCPQ_HUMAN
186	11	11	43.97	30.5	30.5	sp|Q16270|IBP7_HUMAN	Insulin-like growth factor-binding protein 7 OS=Homo sapiens GN=IGFBP7 PE=1 SV=1	HUMAN	9	sp	Q16270	IBP7_HUMAN
187	10.85	10.85	32.54	32.14	32.14	tr|G3V5Z7|G3V5Z7_HUMAN	Proteasome subunit alpha type OS=Homo sapiens GN=PSMA6 PE=1 SV=1	HUMAN	7	tr	G3V5Z7	G3V5Z7_HUMAN
188	10.79	10.85	33.2	31.12	31.12	sp|P28066|PSA5_HUMAN	Proteasome subunit alpha type-5 OS=Homo sapiens GN=PSMA5 PE=1 SV=3	HUMAN	8	sp	P28066	PSA5_HUMAN
189	10.71	10.71	58	43.33	23	sp|O15144|ARPC2_HUMAN	Actin-related protein 2/3 complex subunit 2 OS=Homo sapiens GN=ARPC2 PE=1 SV=1	HUMAN	6	sp	O15144	ARPC2_HUMAN
190	10.53	10.64	27.81	9.706	7.306	sp|P19367|HXK1_HUMAN	Hexokinase-1 OS=Homo sapiens GN=HK1 PE=1 SV=3	HUMAN	6	sp	P19367	HXK1_HUMAN
191	10.47	10.47	23.57	8.81	6.905	sp|P34932|HSP74_HUMAN	Heat shock 70 kDa protein 4 OS=Homo sapiens GN=HSPA4 PE=1 SV=4	HUMAN	5	sp	P34932	HSP74_HUMAN
192	10.33	10.33	15.96	3.871	3.871	tr|A0A087WVQ6|A0A087WVQ6_HUMAN	Clathrin heavy chain OS=Homo sapiens GN=CLTC PE=1 SV=1	HUMAN	6	tr	A0A087WVQ6	A0A087WVQ6_HUMAN
193	10.26	10.26	37.02	21.04	17.82	tr|A0A087WSY9|A0A087WSY9_HUMAN	Thioredoxin reductase 1, cytoplasmic OS=Homo sapiens GN=TXNRD1 PE=1 SV=1	HUMAN	5	tr	A0A087WSY9	A0A087WSY9_HUMAN
194	10.21	10.21	45.62	29.95	22.12	sp|O60664|PLIN3_HUMAN	Perilipin-3 OS=Homo sapiens GN=PLIN3 PE=1 SV=3	HUMAN	6	sp	O60664	PLIN3_HUMAN
195	10.13	10.55	13.7	7.991	7.991	sp|Q14974|IMB1_HUMAN	Importin subunit beta-1 OS=Homo sapiens GN=KPNB1 PE=1 SV=2	HUMAN	6	sp	Q14974	IMB1_HUMAN
196	10.13	10.13	37.07	34.35	29.93	sp|P06748|NPM_HUMAN	Nucleophosmin OS=Homo sapiens GN=NPM1 PE=1 SV=2	HUMAN	9	sp	P06748	NPM_HUMAN
197	10.09	10.09	39.44	22.62	17.2	sp|P78371|TCPB_HUMAN	T-complex protein 1 subunit beta OS=Homo sapiens GN=CCT2 PE=1 SV=4	HUMAN	6	sp	P78371	TCPB_HUMAN
198	10.07	10.07	15.07	4.644	4.408	sp|Q9Y490|TLN1_HUMAN	Talin-1 OS=Homo sapiens GN=TLN1 PE=1 SV=3	HUMAN	5	sp	Q9Y490	TLN1_HUMAN
199	10	10.64	16.12	16.12	16.12	sp|O14498|ISLR_HUMAN	Immunoglobulin superfamily containing leucine-rich repeat protein OS=Homo sapiens GN=ISLR PE=1 SV=1	HUMAN	8	sp	O14498	ISLR_HUMAN
200	9.96	9.96	53.52	42.96	34.51	sp|P69905|HBA_HUMAN	Hemoglobin subunit alpha OS=Homo sapiens GN=HBA1 PE=1 SV=2	HUMAN	11	sp	P69905	HBA_HUMAN
201	9.89	9.89	29.38	11.39	11.39	sp|Q08629|TICN1_HUMAN	Testican-1 OS=Homo sapiens GN=SPOCK1 PE=1 SV=1	HUMAN	5	sp	Q08629	TICN1_HUMAN
202	9.83	9.83	31.25	23.92	18.75	sp|P01008|ANT3_HUMAN	Antithrombin-III OS=Homo sapiens GN=SERPINC1 PE=1 SV=1	HUMAN	13	sp	P01008	ANT3_HUMAN
203	9.81	9.81	29.37	13.52	10.38	sp|P13010|XRCC5_HUMAN	X-ray repair cross-complementing protein 5 OS=Homo sapiens GN=XRCC5 PE=1 SV=3	HUMAN	6	sp	P13010	XRCC5_HUMAN
204	9.79	9.79	44.91	43.41	30.24	sp|P40925|MDHC_HUMAN	Malate dehydrogenase, cytoplasmic OS=Homo sapiens GN=MDH1 PE=1 SV=4	HUMAN	8	sp	P40925	MDHC_HUMAN
205	9.77	9.8	17.85	7.809	6.998	sp|P13497|BMP1_HUMAN	Bone morphogenetic protein 1 OS=Homo sapiens GN=BMP1 PE=1 SV=2	HUMAN	6	sp	P13497	BMP1_HUMAN
206	9.74	9.74	22.73	15.06	13.92	tr|Q5T7F0|Q5T7F0_HUMAN	Neuropilin-1 OS=Homo sapiens GN=NRP1 PE=1 SV=1	HUMAN	6	tr	Q5T7F0	Q5T7F0_HUMAN
207	9.74	9.74	53.14	29.29	29.29	sp|P28072|PSB6_HUMAN	Proteasome subunit beta type-6 OS=Homo sapiens GN=PSMB6 PE=1 SV=4	HUMAN	6	sp	P28072	PSB6_HUMAN
208	9.53	9.53	29.06	21.05	17.16	sp|P26641|EF1G_HUMAN	Elongation factor 1-gamma OS=Homo sapiens GN=EEF1G PE=1 SV=3	HUMAN	7	sp	P26641	EF1G_HUMAN
209	9.42	15.41	58.67	39.11	34.69	sp|Q13162|PRDX4_HUMAN	Peroxiredoxin-4 OS=Homo sapiens GN=PRDX4 PE=1 SV=1	HUMAN	10	sp	Q13162	PRDX4_HUMAN
210	9.38	9.38	40.76	32.35	25.63	tr|B7Z6Z4|B7Z6Z4_HUMAN	Myosin light polypeptide 6 OS=Homo sapiens GN=MYL6 PE=1 SV=1	HUMAN	5	tr	B7Z6Z4	B7Z6Z4_HUMAN
211	9.35	9.35	44.76	44.76	40.48	sp|P09211|GSTP1_HUMAN	Glutathione S-transferase P OS=Homo sapiens GN=GSTP1 PE=1 SV=2	HUMAN	5	sp	P09211	GSTP1_HUMAN
212	9.3	9.31	27.44	18.97	18.97	sp|Q6NZI2|PTRF_HUMAN	Polymerase I and transcript release factor OS=Homo sapiens GN=PTRF PE=1 SV=1	HUMAN	6	sp	Q6NZI2	PTRF_HUMAN
213	9.29	9.3	32.26	15.94	14.23	tr|C9JIZ6|C9JIZ6_HUMAN	Prosaposin OS=Homo sapiens GN=PSAP PE=1 SV=2	HUMAN	7	tr	C9JIZ6	C9JIZ6_HUMAN
214	9.2	9.2	42.61	29.26	29.26	tr|B4DY09|B4DY09_HUMAN	Interleukin enhancer-binding factor 2 OS=Homo sapiens GN=ILF2 PE=1 SV=1	HUMAN	6	tr	B4DY09	B4DY09_HUMAN
215	9.16	9.16	45.79	28.97	28.97	sp|P30044|PRDX5_HUMAN	Peroxiredoxin-5, mitochondrial OS=Homo sapiens GN=PRDX5 PE=1 SV=4	HUMAN	6	sp	P30044	PRDX5_HUMAN
216	9.03	9.05	35.36	26.24	23.95	sp|P25786|PSA1_HUMAN	Proteasome subunit alpha type-1 OS=Homo sapiens GN=PSMA1 PE=1 SV=1	HUMAN	6	sp	P25786	PSA1_HUMAN
217	9.02	9.02	31.86	16.26	13.96	sp|P12956|XRCC6_HUMAN	X-ray repair cross-complementing protein 6 OS=Homo sapiens GN=XRCC6 PE=1 SV=2	HUMAN	6	sp	P12956	XRCC6_HUMAN
218	9.01	9.01	31.69	15.79	11.53	sp|Q14764|MVP_HUMAN	Major vault protein OS=Homo sapiens GN=MVP PE=1 SV=4	HUMAN	5	sp	Q14764	MVP_HUMAN
219	8.99	8.99	57.21	41.79	41.79	sp|P49721|PSB2_HUMAN	Proteasome subunit beta type-2 OS=Homo sapiens GN=PSMB2 PE=1 SV=1	HUMAN	8	sp	P49721	PSB2_HUMAN
220	8.92	8.93	12.32	3.867	2.762	tr|A0A087WTM7|A0A087WTM7_HUMAN	Apolipoprotein B-100 OS=Homo sapiens GN=APOB PE=1 SV=1	HUMAN	10	tr	A0A087WTM7	A0A087WTM7_HUMAN
221	8.85	8.88	44.68	41.7	22.98	tr|J3QQX2|J3QQX2_HUMAN	Rho GDP-dissociation inhibitor 1 OS=Homo sapiens GN=ARHGDIA PE=1 SV=1	HUMAN	6	tr	J3QQX2	J3QQX2_HUMAN
222	8.8	8.8	19.66	16.26	16.26	sp|P06576|ATPB_HUMAN	ATP synthase subunit beta, mitochondrial OS=Homo sapiens GN=ATP5B PE=1 SV=3	HUMAN	6	sp	P06576	ATPB_HUMAN
223	8.74	8.74	24.48	8.318	7.656	sp|P22314|UBA1_HUMAN	Ubiquitin-like modifier-activating enzyme 1 OS=Homo sapiens GN=UBA1 PE=1 SV=3	HUMAN	5	sp	P22314	UBA1_HUMAN
224	8.65	8.67	48.07	38.67	38.67	tr|F8WCF6|F8WCF6_HUMAN	Protein ARPC4-TTLL3 OS=Homo sapiens GN=ARPC4-TTLL3 PE=1 SV=1	HUMAN	6	tr	F8WCF6	F8WCF6_HUMAN
225	8.61	8.61	43.36	30.62	20.33	tr|B4E3S0|B4E3S0_HUMAN	Coronin OS=Homo sapiens GN=CORO1C PE=1 SV=1	HUMAN	6	tr	B4E3S0	B4E3S0_HUMAN
226	8.61	8.61	53.85	44.62	27.31	tr|K7ERG9|K7ERG9_HUMAN	Complement factor D OS=Homo sapiens GN=CFD PE=1 SV=1	HUMAN	5	tr	K7ERG9	K7ERG9_HUMAN
227	8.55	9.75	31.22	26.14	21.83	sp|P61160|ARP2_HUMAN	Actin-related protein 2 OS=Homo sapiens GN=ACTR2 PE=1 SV=1	HUMAN	8	sp	P61160	ARP2_HUMAN
228	8.55	8.55	45.41	26.22	21.08	sp|Q9Y617|SERC_HUMAN	Phosphoserine aminotransferase OS=Homo sapiens GN=PSAT1 PE=1 SV=2	HUMAN	7	sp	Q9Y617	SERC_HUMAN
229	8.49	8.57	19.04	10.81	8.477	sp|P55884|EIF3B_HUMAN	Eukaryotic translation initiation factor 3 subunit B OS=Homo sapiens GN=EIF3B PE=1 SV=3	HUMAN	4	sp	P55884	EIF3B_HUMAN
230	8.49	8.49	19.89	10.11	7.528	sp|Q06033|ITIH3_HUMAN	Inter-alpha-trypsin inhibitor heavy chain H3 OS=Homo sapiens GN=ITIH3 PE=1 SV=2	HUMAN	5	sp	Q06033	ITIH3_HUMAN
231	8.44	8.44	66.67	35.61	27.27	sp|P28070|PSB4_HUMAN	Proteasome subunit beta type-4 OS=Homo sapiens GN=PSMB4 PE=1 SV=4	HUMAN	8	sp	P28070	PSB4_HUMAN
232	8.41	8.45	41.39	13.07	13.07	tr|C9J813|C9J813_HUMAN	Caldesmon (Fragment) OS=Homo sapiens GN=CALD1 PE=1 SV=1	HUMAN	6	tr	C9J813	C9J813_HUMAN
233	8.36	8.36	17.5	8.66	6.746	sp|O00410|IPO5_HUMAN	Importin-5 OS=Homo sapiens GN=IPO5 PE=1 SV=4	HUMAN	4	sp	O00410	IPO5_HUMAN
234	8.24	8.25	18.94	7.048	6.388	sp|Q13200|PSMD2_HUMAN	26S proteasome non-ATPase regulatory subunit 2 OS=Homo sapiens GN=PSMD2 PE=1 SV=3	HUMAN	4	sp	Q13200	PSMD2_HUMAN
235	8.22	8.22	42.34	33.93	24.02	sp|P07711|CATL1_HUMAN	Cathepsin L1 OS=Homo sapiens GN=CTSL PE=1 SV=2	HUMAN	7	sp	P07711	CATL1_HUMAN
236	8.2	8.71	53.33	43.03	31.52	sp|P62937|PPIA_HUMAN	Peptidyl-prolyl cis-trans isomerase A OS=Homo sapiens GN=PPIA PE=1 SV=2	HUMAN	9	sp	P62937	PPIA_HUMAN
237	8.1	8.1	44.38	26.4	22.47	sp|O15145|ARPC3_HUMAN	Actin-related protein 2/3 complex subunit 3 OS=Homo sapiens GN=ARPC3 PE=1 SV=3	HUMAN	5	sp	O15145	ARPC3_HUMAN
238	8.09	8.09	19.97	12.2	10.86	sp|Q96TA1|NIBL1_HUMAN	Niban-like protein 1 OS=Homo sapiens GN=FAM129B PE=1 SV=3	HUMAN	4	sp	Q96TA1	NIBL1_HUMAN
239	8.08	8.08	26.41	7.775	7.775	sp|Q16394|EXT1_HUMAN	Exostosin-1 OS=Homo sapiens GN=EXT1 PE=1 SV=2	HUMAN	4	sp	Q16394	EXT1_HUMAN
240	8.02	10.96	31.33	26.63	23.76	sp|O95084|PRS23_HUMAN	Serine protease 23 OS=Homo sapiens GN=PRSS23 PE=1 SV=1	HUMAN	7	sp	O95084	PRS23_HUMAN
241	8.01	8.01	48.63	23.29	19.18	sp|P01034|CYTC_HUMAN	Cystatin-C OS=Homo sapiens GN=CST3 PE=1 SV=1	HUMAN	8	sp	P01034	CYTC_HUMAN
242	7.89	11.23	35.37	14.4	11.89	sp|P35908|K22E_HUMAN	Keratin, type II cytoskeletal 2 epidermal OS=Homo sapiens GN=KRT2 PE=1 SV=2	HUMAN	7	sp	P35908	K22E_HUMAN
243	7.84	9.93	18.39	12.15	10.67	sp|P02771|FETA_HUMAN	Alpha-fetoprotein OS=Homo sapiens GN=AFP PE=1 SV=1	HUMAN	6	sp	P02771	FETA_HUMAN
244	7.82	7.82	21.65	15.29	15.29	tr|D6RGI3|D6RGI3_HUMAN	Septin 11, isoform CRA_b OS=Homo sapiens GN=SEPT11 PE=1 SV=1	HUMAN	5	tr	D6RGI3	D6RGI3_HUMAN
245	7.81	7.81	35.15	9.613	8.752	tr|E9PRY8|E9PRY8_HUMAN	Elongation factor 1-delta OS=Homo sapiens GN=EEF1D PE=1 SV=1	HUMAN	4	tr	E9PRY8	E9PRY8_HUMAN
246	7.79	8.08	31.25	25.39	22.66	sp|P30048|PRDX3_HUMAN	Thioredoxin-dependent peroxide reductase, mitochondrial OS=Homo sapiens GN=PRDX3 PE=1 SV=3	HUMAN	6	sp	P30048	PRDX3_HUMAN
247	7.74	7.74	29.9	16.84	11.68	sp|P50281|MMP14_HUMAN	Matrix metalloproteinase-14 OS=Homo sapiens GN=MMP14 PE=1 SV=3	HUMAN	6	sp	P50281	MMP14_HUMAN
248	7.7	7.7	35.66	35.66	35.66	sp|Q9BTM1|H2AJ_HUMAN	Histone H2A.J OS=Homo sapiens GN=H2AFJ PE=1 SV=1	HUMAN	4	sp	Q9BTM1	H2AJ_HUMAN
249	7.68	7.68	34.37	19.46	16.77	sp|P52209|6PGD_HUMAN	6-phosphogluconate dehydrogenase, decarboxylating OS=Homo sapiens GN=PGD PE=1 SV=3	HUMAN	5	sp	P52209	6PGD_HUMAN
250	7.68	7.68	21.74	8.424	5.707	sp|Q32P28|P3H1_HUMAN	Prolyl 3-hydroxylase 1 OS=Homo sapiens GN=LEPRE1 PE=1 SV=2	HUMAN	4	sp	Q32P28	P3H1_HUMAN
251	7.68	7.68	71.71	32.24	27.63	sp|P62269|RS18_HUMAN	40S ribosomal protein S18 OS=Homo sapiens GN=RPS18 PE=1 SV=3	HUMAN	4	sp	P62269	RS18_HUMAN
252	7.65	7.65	27.6	15.13	12.76	sp|P37837|TALDO_HUMAN	Transaldolase OS=Homo sapiens GN=TALDO1 PE=1 SV=2	HUMAN	5	sp	P37837	TALDO_HUMAN
253	7.58	7.58	27.62	27.62	25.71	tr|D3DQH8|D3DQH8_HUMAN	SPARC OS=Homo sapiens GN=SPARC PE=1 SV=1	HUMAN	8	tr	D3DQH8	D3DQH8_HUMAN
254	7.54	7.54	23.53	17.44	10.95	sp|Q16658|FSCN1_HUMAN	Fascin OS=Homo sapiens GN=FSCN1 PE=1 SV=3	HUMAN	5	sp	Q16658	FSCN1_HUMAN
255	7.42	9.47	15.26	4.009	4.009	sp|Q05707|COEA1_HUMAN	Collagen alpha-1(XIV) chain OS=Homo sapiens GN=COL14A1 PE=1 SV=3	HUMAN	6	sp	Q05707	COEA1_HUMAN
256	7.27	7.9	25.31	3.678	2.431	sp|Q07092|COGA1_HUMAN	Collagen alpha-1(XVI) chain OS=Homo sapiens GN=COL16A1 PE=1 SV=2	HUMAN	5	sp	Q07092	COGA1_HUMAN
257	7.14	7.14	39.16	27.11	26.51	tr|U3KQK0|U3KQK0_HUMAN	Histone H2B OS=Homo sapiens GN=HIST1H2BN PE=1 SV=1	HUMAN	7	tr	U3KQK0	U3KQK0_HUMAN
258	7.11	7.11	40.61	29.5	27.59	sp|P30040|ERP29_HUMAN	Endoplasmic reticulum resident protein 29 OS=Homo sapiens GN=ERP29 PE=1 SV=4	HUMAN	6	sp	P30040	ERP29_HUMAN
259	7.06	7.06	29.44	14.63	12.02	sp|P21589|5NTD_HUMAN	5'-nucleotidase OS=Homo sapiens GN=NT5E PE=1 SV=1	HUMAN	5	sp	P21589	5NTD_HUMAN
260	6.95	6.95	43.05	43.05	27.81	sp|P62277|RS13_HUMAN	40S ribosomal protein S13 OS=Homo sapiens GN=RPS13 PE=1 SV=2	HUMAN	5	sp	P62277	RS13_HUMAN
261	6.94	6.94	26.31	15.26	7.831	tr|X6R8A1|X6R8A1_HUMAN	Carboxypeptidase OS=Homo sapiens GN=CTSA PE=1 SV=1	HUMAN	4	tr	X6R8A1	X6R8A1_HUMAN
262	6.8	6.8	45.76	33.33	33.33	tr|J3QRS3|J3QRS3_HUMAN	Myosin regulatory light chain 12A OS=Homo sapiens GN=MYL12A PE=1 SV=1	HUMAN	5	tr	J3QRS3	J3QRS3_HUMAN
263	6.8	6.8	52.59	52.59	41.48	sp|P09382|LEG1_HUMAN	Galectin-1 OS=Homo sapiens GN=LGALS1 PE=1 SV=2	HUMAN	10	sp	P09382	LEG1_HUMAN
264	6.77	22.7	42.54	24.87	18.52	sp|P35241|RADI_HUMAN	Radixin OS=Homo sapiens GN=RDX PE=1 SV=1	HUMAN	12	sp	P35241	RADI_HUMAN
265	6.75	6.76	17.47	4.003	3.493	tr|A0A087X0K0|A0A087X0K0_HUMAN	Collagen alpha-1(XV) chain OS=Homo sapiens GN=COL15A1 PE=1 SV=1	HUMAN	4	tr	A0A087X0K0	A0A087X0K0_HUMAN
266	6.69	6.8	30.36	20.59	12.74	sp|P23381|SYWC_HUMAN	Tryptophan--tRNA ligase, cytoplasmic OS=Homo sapiens GN=WARS PE=1 SV=2	HUMAN	3	sp	P23381	SYWC_HUMAN
267	6.67	6.67	9.198	5.027	3.636	tr|B7ZKJ8|B7ZKJ8_HUMAN	ITIH4 protein OS=Homo sapiens GN=ITIH4 PE=1 SV=1	HUMAN	6	tr	B7ZKJ8	B7ZKJ8_HUMAN
268	6.65	6.65	39.57	14.69	12.56	sp|O75462|CRLF1_HUMAN	Cytokine receptor-like factor 1 OS=Homo sapiens GN=CRLF1 PE=1 SV=1	HUMAN	4	sp	O75462	CRLF1_HUMAN
269	6.6	6.6	18.54	5.854	4.634	sp|Q86VP6|CAND1_HUMAN	Cullin-associated NEDD8-dissociated protein 1 OS=Homo sapiens GN=CAND1 PE=1 SV=2	HUMAN	4	sp	Q86VP6	CAND1_HUMAN
270	6.58	6.58	50	34	31.2	sp|P17931|LEG3_HUMAN	Galectin-3 OS=Homo sapiens GN=LGALS3 PE=1 SV=5	HUMAN	5	sp	P17931	LEG3_HUMAN
271	6.47	6.47	36.36	26.57	24.13	sp|P60174|TPIS_HUMAN	Triosephosphate isomerase OS=Homo sapiens GN=TPI1 PE=1 SV=3	HUMAN	4	sp	P60174	TPIS_HUMAN
272	6.44	8.62	53.01	25.3	15.18	sp|Q9UKZ9|PCOC2_HUMAN	Procollagen C-endopeptidase enhancer 2 OS=Homo sapiens GN=PCOLCE2 PE=1 SV=1	HUMAN	8	sp	Q9UKZ9	PCOC2_HUMAN
273	6.4	6.4	34.76	24.89	20.6	tr|B5MDF5|B5MDF5_HUMAN	GTP-binding nuclear protein Ran OS=Homo sapiens GN=RAN PE=1 SV=1	HUMAN	4	tr	B5MDF5	B5MDF5_HUMAN
274	6.34	6.35	11.53	4.951	3.917	tr|F5H7V9|F5H7V9_HUMAN	Tenascin OS=Homo sapiens GN=TNC PE=1 SV=1	HUMAN	5	tr	F5H7V9	F5H7V9_HUMAN
275	6.33	6.62	27.57	2.979	2.629	sp|P08572|CO4A2_HUMAN	Collagen alpha-2(IV) chain OS=Homo sapiens GN=COL4A2 PE=1 SV=4	HUMAN	4	sp	P08572	CO4A2_HUMAN
276	6.3	6.3	40.61	33.33	24.24	sp|P30050|RL12_HUMAN	60S ribosomal protein L12 OS=Homo sapiens GN=RPL12 PE=1 SV=1	HUMAN	4	sp	P30050	RL12_HUMAN
277	6.29	6.29	35.21	19.15	13.52	sp|Q14103|HNRPD_HUMAN	Heterogeneous nuclear ribonucleoprotein D0 OS=Homo sapiens GN=HNRNPD PE=1 SV=1	HUMAN	4	sp	Q14103	HNRPD_HUMAN
278	6.23	6.23	53.62	41.55	28.5	tr|D6RE83|D6RE83_HUMAN	Ubiquitin carboxyl-terminal hydrolase OS=Homo sapiens GN=UCHL1 PE=1 SV=1	HUMAN	6	tr	D6RE83	D6RE83_HUMAN
279	6.19	6.19	35.87	31.91	16.72	sp|P43235|CATK_HUMAN	Cathepsin K OS=Homo sapiens GN=CTSK PE=1 SV=1	HUMAN	4	sp	P43235	CATK_HUMAN
280	6.1	6.11	12.62	2.27	1.752	sp|P49327|FAS_HUMAN	Fatty acid synthase OS=Homo sapiens GN=FASN PE=1 SV=3	HUMAN	3	sp	P49327	FAS_HUMAN
281	6.1	6.1	27.45	9.952	8.668	sp|O60506|HNRPQ_HUMAN	Heterogeneous nuclear ribonucleoprotein Q OS=Homo sapiens GN=SYNCRIP PE=1 SV=2	HUMAN	4	sp	O60506	HNRPQ_HUMAN
282	6.09	6.1	45.8	14.08	14.08	sp|P16870|CBPE_HUMAN	Carboxypeptidase E OS=Homo sapiens GN=CPE PE=1 SV=1	HUMAN	4	sp	P16870	CBPE_HUMAN
283	6.03	6.03	19.16	15.33	15.33	sp|P25789|PSA4_HUMAN	Proteasome subunit alpha type-4 OS=Homo sapiens GN=PSMA4 PE=1 SV=1	HUMAN	4	sp	P25789	PSA4_HUMAN
284	6.01	6.01	53.33	45.71	37.14	sp|P31949|S10AB_HUMAN	Protein S100-A11 OS=Homo sapiens GN=S100A11 PE=1 SV=2	HUMAN	6	sp	P31949	S10AB_HUMAN
285	6	6.06	77.45	73.53	37.25	sp|P61604|CH10_HUMAN	10 kDa heat shock protein, mitochondrial OS=Homo sapiens GN=HSPE1 PE=1 SV=2	HUMAN	4	sp	P61604	CH10_HUMAN
286	6	6	38.77	25.99	25.99	sp|P80723|BASP1_HUMAN	Brain acid soluble protein 1 OS=Homo sapiens GN=BASP1 PE=1 SV=2	HUMAN	3	sp	P80723	BASP1_HUMAN
287	5.94	5.94	38.43	30.2	23.92	sp|P25788|PSA3_HUMAN	Proteasome subunit alpha type-3 OS=Homo sapiens GN=PSMA3 PE=1 SV=2	HUMAN	5	sp	P25788	PSA3_HUMAN
288	5.91	5.91	54.63	36.1	27.8	sp|P49720|PSB3_HUMAN	Proteasome subunit beta type-3 OS=Homo sapiens GN=PSMB3 PE=1 SV=2	HUMAN	4	sp	P49720	PSB3_HUMAN
289	5.91	5.91	29.26	15.27	15.27	sp|Q99536|VAT1_HUMAN	Synaptic vesicle membrane protein VAT-1 homolog OS=Homo sapiens GN=VAT1 PE=1 SV=2	HUMAN	5	sp	Q99536	VAT1_HUMAN
290	5.87	5.87	25.96	8.215	4.491	tr|A0A087X253|A0A087X253_HUMAN	AP complex subunit beta OS=Homo sapiens GN=AP2B1 PE=1 SV=1	HUMAN	4	tr	A0A087X253	A0A087X253_HUMAN
291	5.85	5.85	57.14	36.67	27.14	tr|Q5T9B7|Q5T9B7_HUMAN	Adenylate kinase isoenzyme 1 OS=Homo sapiens GN=AK1 PE=1 SV=1	HUMAN	6	tr	Q5T9B7	Q5T9B7_HUMAN
292	5.84	5.84	18.59	4.06	2.422	sp|Q92954|PRG4_HUMAN	Proteoglycan 4 OS=Homo sapiens GN=PRG4 PE=1 SV=2	HUMAN	3	sp	Q92954	PRG4_HUMAN
293	5.84	5.84	60	48.75	48.75	tr|E9PHK0|E9PHK0_HUMAN	Tetranectin OS=Homo sapiens GN=CLEC3B PE=1 SV=1	HUMAN	9	tr	E9PHK0	E9PHK0_HUMAN
294	5.81	5.81	12.03	7.506	4.305	sp|P19022|CADH2_HUMAN	Cadherin-2 OS=Homo sapiens GN=CDH2 PE=1 SV=4	HUMAN	4	sp	P19022	CADH2_HUMAN
295	5.74	5.74	44.12	17.27	14.87	sp|P00558|PGK1_HUMAN	Phosphoglycerate kinase 1 OS=Homo sapiens GN=PGK1 PE=1 SV=3	HUMAN	5	sp	P00558	PGK1_HUMAN
296	5.68	6.2	57.43	45.54	32.67	tr|C9JFR7|C9JFR7_HUMAN	Cytochrome c (Fragment) OS=Homo sapiens GN=CYCS PE=1 SV=1	HUMAN	3	tr	C9JFR7	C9JFR7_HUMAN
297	5.59	5.98	22.65	16.79	10.18	sp|Q9BWS9|CHID1_HUMAN	Chitinase domain-containing protein 1 OS=Homo sapiens GN=CHID1 PE=1 SV=1	HUMAN	4	sp	Q9BWS9	CHID1_HUMAN
298	5.59	5.59	13.46	3.135	3.135	sp|Q13219|PAPP1_HUMAN	Pappalysin-1 OS=Homo sapiens GN=PAPPA PE=1 SV=3	HUMAN	3	sp	Q13219	PAPP1_HUMAN
299	5.58	5.58	31.47	21.83	19.8	tr|A0A0B4J2A4|A0A0B4J2A4_HUMAN	3-ketoacyl-CoA thiolase, mitochondrial OS=Homo sapiens GN=ACAA2 PE=4 SV=1	HUMAN	5	tr	A0A0B4J2A4	A0A0B4J2A4_HUMAN
300	5.55	5.55	43.46	15.19	15.19	tr|D6RD18|D6RD18_HUMAN	Heterogeneous nuclear ribonucleoprotein A/B OS=Homo sapiens GN=HNRNPAB PE=1 SV=1	HUMAN	3	tr	D6RD18	D6RD18_HUMAN
301	5.54	5.54	22	16.87	16.87	sp|P54727|RD23B_HUMAN	UV excision repair protein RAD23 homolog B OS=Homo sapiens GN=RAD23B PE=1 SV=1	HUMAN	4	sp	P54727	RD23B_HUMAN
302	5.54	5.54	35.2	27.55	27.55	sp|P30085|KCY_HUMAN	UMP-CMP kinase OS=Homo sapiens GN=CMPK1 PE=1 SV=3	HUMAN	4	sp	P30085	KCY_HUMAN
303	5.52	5.7	11.42	2.422	2.076	sp|Q6YHK3|CD109_HUMAN	CD109 antigen OS=Homo sapiens GN=CD109 PE=1 SV=2	HUMAN	3	sp	Q6YHK3	CD109_HUMAN
304	5.51	5.51	16.2	14.69	12.74	sp|Q6UXB8|PI16_HUMAN	Peptidase inhibitor 16 OS=Homo sapiens GN=PI16 PE=1 SV=1	HUMAN	4	sp	Q6UXB8	PI16_HUMAN
305	5.5	5.5	62.61	62.61	55.65	sp|P05387|RLA2_HUMAN	60S acidic ribosomal protein P2 OS=Homo sapiens GN=RPLP2 PE=1 SV=1	HUMAN	3	sp	P05387	RLA2_HUMAN
306	5.43	5.43	22.59	9.225	7.086	sp|O14672|ADA10_HUMAN	Disintegrin and metalloproteinase domain-containing protein 10 OS=Homo sapiens GN=ADAM10 PE=1 SV=1	HUMAN	3	sp	O14672	ADA10_HUMAN
307	5.39	5.39	29.17	15.42	15.42	sp|P08294|SODE_HUMAN	Extracellular superoxide dismutase [Cu-Zn] OS=Homo sapiens GN=SOD3 PE=1 SV=2	HUMAN	3	sp	P08294	SODE_HUMAN
308	5.36	5.36	43.69	34.47	29.61	sp|P30043|BLVRB_HUMAN	Flavin reductase (NADPH) OS=Homo sapiens GN=BLVRB PE=1 SV=3	HUMAN	4	sp	P30043	BLVRB_HUMAN
309	5.35	5.35	29.93	29.93	29.93	sp|P68871|HBB_HUMAN	Hemoglobin subunit beta OS=Homo sapiens GN=HBB PE=1 SV=2	HUMAN	9	sp	P68871	HBB_HUMAN
310	5.31	5.31	32.05	13.97	13.97	sp|P30447|1A23_HUMAN	HLA class I histocompatibility antigen, A-23 alpha chain OS=Homo sapiens GN=HLA-A PE=1 SV=1	HUMAN	3	sp	P30447	1A23_HUMAN
311	5.29	5.29	40	20	16.5	sp|P61026|RAB10_HUMAN	Ras-related protein Rab-10 OS=Homo sapiens GN=RAB10 PE=1 SV=1	HUMAN	3	sp	P61026	RAB10_HUMAN
312	5.28	5.56	16.16	6.647	6.647	tr|D6RAR4|D6RAR4_HUMAN	Hepatocyte growth factor activator OS=Homo sapiens GN=HGFAC PE=1 SV=1	HUMAN	3	tr	D6RAR4	D6RAR4_HUMAN
313	5.22	5.22	33.5	16.75	5.825	sp|P07339|CATD_HUMAN	Cathepsin D OS=Homo sapiens GN=CTSD PE=1 SV=1	HUMAN	3	sp	P07339	CATD_HUMAN
314	5.22	5.22	52.74	45.89	34.93	sp|P62249|RS16_HUMAN	40S ribosomal protein S16 OS=Homo sapiens GN=RPS16 PE=1 SV=2	HUMAN	5	sp	P62249	RS16_HUMAN
315	5.21	5.21	32.1	18.93	18.93	sp|Q96CG8|CTHR1_HUMAN	Collagen triple helix repeat-containing protein 1 OS=Homo sapiens GN=CTHRC1 PE=1 SV=1	HUMAN	4	sp	Q96CG8	CTHR1_HUMAN
316	5.2	5.28	38.7	17.12	15.41	tr|G3V4C1|G3V4C1_HUMAN	Heterogeneous nuclear ribonucleoproteins C1/C2 OS=Homo sapiens GN=HNRNPC PE=1 SV=1	HUMAN	4	tr	G3V4C1	G3V4C1_HUMAN
317	5.15	5.15	32.48	14.72	8.645	sp|Q13838|DX39B_HUMAN	Spliceosome RNA helicase DDX39B OS=Homo sapiens GN=DDX39B PE=1 SV=1	HUMAN	4	sp	Q13838	DX39B_HUMAN
318	5.14	5.14	10.2	2.924	2.566	sp|P01031|CO5_HUMAN	Complement C5 OS=Homo sapiens GN=C5 PE=1 SV=4	HUMAN	3	sp	P01031	CO5_HUMAN
319	5.13	5.15	36.46	21.88	17.71	tr|H0YGR4|H0YGR4_HUMAN	Oligoribonuclease, mitochondrial (Fragment) OS=Homo sapiens GN=REXO2 PE=1 SV=1	HUMAN	3	tr	H0YGR4	H0YGR4_HUMAN
320	5.13	5.14	78.91	57.81	27.34	sp|P62987|RL40_HUMAN	Ubiquitin-60S ribosomal protein L40 OS=Homo sapiens GN=UBA52 PE=1 SV=2	HUMAN	3	sp	P62987	RL40_HUMAN
321	5.12	5.12	11.62	4.888	4.888	sp|Q9HCU0|CD248_HUMAN	Endosialin OS=Homo sapiens GN=CD248 PE=1 SV=1	HUMAN	4	sp	Q9HCU0	CD248_HUMAN
322	5.1	5.1	62.16	33.11	22.3	sp|Q04837|SSBP_HUMAN	Single-stranded DNA-binding protein, mitochondrial OS=Homo sapiens GN=SSBP1 PE=1 SV=1	HUMAN	3	sp	Q04837	SSBP_HUMAN
323	5.09	5.09	19.37	8.639	8.639	sp|P51888|PRELP_HUMAN	Prolargin OS=Homo sapiens GN=PRELP PE=1 SV=1	HUMAN	3	sp	P51888	PRELP_HUMAN
324	5.06	5.06	35.02	17.63	8.937	sp|O75874|IDHC_HUMAN	Isocitrate dehydrogenase [NADP] cytoplasmic OS=Homo sapiens GN=IDH1 PE=1 SV=2	HUMAN	3	sp	O75874	IDHC_HUMAN
325	5.04	5.04	54.17	41.67	41.67	sp|P24592|IBP6_HUMAN	Insulin-like growth factor-binding protein 6 OS=Homo sapiens GN=IGFBP6 PE=1 SV=1	HUMAN	13	sp	P24592	IBP6_HUMAN
326	4.96	4.97	37.55	20.58	17.33	sp|Q15404|RSU1_HUMAN	Ras suppressor protein 1 OS=Homo sapiens GN=RSU1 PE=1 SV=3	HUMAN	3	sp	Q15404	RSU1_HUMAN
327	4.93	4.93	37.89	13.47	9.684	sp|Q01518|CAP1_HUMAN	Adenylyl cyclase-associated protein 1 OS=Homo sapiens GN=CAP1 PE=1 SV=5	HUMAN	3	sp	Q01518	CAP1_HUMAN
328	4.88	9.18	68.29	44.72	23.17	sp|P31946|1433B_HUMAN	14-3-3 protein beta/alpha OS=Homo sapiens GN=YWHAB PE=1 SV=3	HUMAN	6	sp	P31946	1433B_HUMAN
329	4.88	4.88	15.73	10.48	8.669	sp|P42785|PCP_HUMAN	Lysosomal Pro-X carboxypeptidase OS=Homo sapiens GN=PRCP PE=1 SV=1	HUMAN	3	sp	P42785	PCP_HUMAN
330	4.86	4.86	14.12	5.549	5.549	sp|Q8IXB1|DJC10_HUMAN	DnaJ homolog subfamily C member 10 OS=Homo sapiens GN=DNAJC10 PE=1 SV=2	HUMAN	3	sp	Q8IXB1	DJC10_HUMAN
331	4.85	4.89	41.7	27.35	22.42	tr|E9PGT1|E9PGT1_HUMAN	Translin OS=Homo sapiens GN=TSN PE=1 SV=1	HUMAN	4	tr	E9PGT1	E9PGT1_HUMAN
332	4.81	4.81	38.31	14.73	12.57	sp|P09622|DLDH_HUMAN	Dihydrolipoyl dehydrogenase, mitochondrial OS=Homo sapiens GN=DLD PE=1 SV=2	HUMAN	5	sp	P09622	DLDH_HUMAN
333	4.8	4.8	18.87	9.973	9.973	tr|H7C2I1|H7C2I1_HUMAN	Protein arginine N-methyltransferase 1 OS=Homo sapiens GN=PRMT1 PE=1 SV=1	HUMAN	3	tr	H7C2I1	H7C2I1_HUMAN
334	4.79	4.79	58.65	21.8	21.8	sp|O94907|DKK1_HUMAN	Dickkopf-related protein 1 OS=Homo sapiens GN=DKK1 PE=1 SV=1	HUMAN	4	sp	O94907	DKK1_HUMAN
335	4.78	4.81	33.33	18.52	18.52	sp|O75347|TBCA_HUMAN	Tubulin-specific chaperone A OS=Homo sapiens GN=TBCA PE=1 SV=3	HUMAN	3	sp	O75347	TBCA_HUMAN
336	4.75	4.77	49.46	21.74	13.59	sp|P62834|RAP1A_HUMAN	Ras-related protein Rap-1A OS=Homo sapiens GN=RAP1A PE=1 SV=1	HUMAN	3	sp	P62834	RAP1A_HUMAN
337	4.73	6.98	24.49	12.89	8.471	sp|Q99832|TCPH_HUMAN	T-complex protein 1 subunit eta OS=Homo sapiens GN=CCT7 PE=1 SV=2	HUMAN	4	sp	Q99832	TCPH_HUMAN
338	4.73	4.73	16.3	5.571	5.571	tr|F5H365|F5H365_HUMAN	Protein transport protein Sec23A OS=Homo sapiens GN=SEC23A PE=1 SV=1	HUMAN	3	tr	F5H365	F5H365_HUMAN
339	4.71	4.71	21.68	11.86	6.748	tr|G3XA98|G3XA98_HUMAN	Fibulin 5, isoform CRA_a OS=Homo sapiens GN=FBLN5 PE=1 SV=1	HUMAN	3	tr	G3XA98	G3XA98_HUMAN
340	4.7	4.71	27.57	17.76	15.65	tr|M0R1G9|M0R1G9_HUMAN	Pregnancy-specific beta-1-glycoprotein 5 OS=Homo sapiens GN=PSG5 PE=1 SV=1	HUMAN	5	tr	M0R1G9	M0R1G9_HUMAN
341	4.7	4.7	18.62	17.29	17.29	sp|Q06828|FMOD_HUMAN	Fibromodulin OS=Homo sapiens GN=FMOD PE=1 SV=2	HUMAN	4	sp	Q06828	FMOD_HUMAN
342	4.68	4.71	48.48	42.42	30.3	sp|P25398|RS12_HUMAN	40S ribosomal protein S12 OS=Homo sapiens GN=RPS12 PE=1 SV=3	HUMAN	4	sp	P25398	RS12_HUMAN
343	4.68	4.71	51.49	45.54	27.72	sp|P26447|S10A4_HUMAN	Protein S100-A4 OS=Homo sapiens GN=S100A4 PE=1 SV=1	HUMAN	4	sp	P26447	S10A4_HUMAN
344	4.63	4.63	24.06	12.81	11.87	tr|J3KQJ1|J3KQJ1_HUMAN	Sulfatase-modifying factor 2 OS=Homo sapiens GN=SUMF2 PE=1 SV=1	HUMAN	3	tr	J3KQJ1	J3KQJ1_HUMAN
345	4.61	4.61	33.18	6.604	4.874	sp|P11940|PABP1_HUMAN	Polyadenylate-binding protein 1 OS=Homo sapiens GN=PABPC1 PE=1 SV=2	HUMAN	3	sp	P11940	PABP1_HUMAN
346	4.61	4.61	19.24	6.96	4.708	sp|O95782|AP2A1_HUMAN	AP-2 complex subunit alpha-1 OS=Homo sapiens GN=AP2A1 PE=1 SV=3	HUMAN	2	sp	O95782	AP2A1_HUMAN
347	4.59	4.69	17.85	0.9243	0.8143	sp|Q07954|LRP1_HUMAN	Prolow-density lipoprotein receptor-related protein 1 OS=Homo sapiens GN=LRP1 PE=1 SV=2	HUMAN	3	sp	Q07954	LRP1_HUMAN
348	4.57	4.57	24.92	16.72	16.72	sp|Q9UJJ9|GNPTG_HUMAN	N-acetylglucosamine-1-phosphotransferase subunit gamma OS=Homo sapiens GN=GNPTG PE=1 SV=1	HUMAN	4	sp	Q9UJJ9	GNPTG_HUMAN
349	4.55	4.56	20.22	6.106	4.342	sp|O00469|PLOD2_HUMAN	Procollagen-lysine,2-oxoglutarate 5-dioxygenase 2 OS=Homo sapiens GN=PLOD2 PE=1 SV=2	HUMAN	3	sp	O00469	PLOD2_HUMAN
350	4.55	4.55	30.09	12.44	8.824	sp|Q9BRK3|MXRA8_HUMAN	Matrix-remodeling-associated protein 8 OS=Homo sapiens GN=MXRA8 PE=2 SV=1	HUMAN	4	sp	Q9BRK3	MXRA8_HUMAN
351	4.51	19.89	41.81	17.92	17.92	sp|P15311|EZRI_HUMAN	Ezrin OS=Homo sapiens GN=EZR PE=1 SV=4	HUMAN	12	sp	P15311	EZRI_HUMAN
352	4.51	4.51	26.37	12.17	8.316	sp|P55058|PLTP_HUMAN	Phospholipid transfer protein OS=Homo sapiens GN=PLTP PE=1 SV=1	HUMAN	3	sp	P55058	PLTP_HUMAN
353	4.5	4.51	47.9	20.17	20.17	sp|P62314|SMD1_HUMAN	Small nuclear ribonucleoprotein Sm D1 OS=Homo sapiens GN=SNRPD1 PE=1 SV=1	HUMAN	3	sp	P62314	SMD1_HUMAN
354	4.5	4.5	32.75	21.74	11.88	tr|F8W914|F8W914_HUMAN	Reticulon OS=Homo sapiens GN=RTN4 PE=1 SV=1	HUMAN	3	tr	F8W914	F8W914_HUMAN
355	4.49	4.5	34.94	9.427	7.948	sp|P48643|TCPE_HUMAN	T-complex protein 1 subunit epsilon OS=Homo sapiens GN=CCT5 PE=1 SV=1	HUMAN	3	sp	P48643	TCPE_HUMAN
356	4.49	4.49	17.22	5.807	3.74	sp|Q9Y6C2|EMIL1_HUMAN	EMILIN-1 OS=Homo sapiens GN=EMILIN1 PE=1 SV=2	HUMAN	3	sp	Q9Y6C2	EMIL1_HUMAN
357	4.48	4.49	33.51	25.53	25.53	tr|Q5JR95|Q5JR95_HUMAN	40S ribosomal protein S8 OS=Homo sapiens GN=RPS8 PE=1 SV=1	HUMAN	4	tr	Q5JR95	Q5JR95_HUMAN
358	4.47	4.47	41.27	20.63	20.63	sp|P62318|SMD3_HUMAN	Small nuclear ribonucleoprotein Sm D3 OS=Homo sapiens GN=SNRPD3 PE=1 SV=1	HUMAN	4	sp	P62318	SMD3_HUMAN
359	4.36	4.36	27.11	12.1	9.648	sp|P33908|MA1A1_HUMAN	Mannosyl-oligosaccharide 1,2-alpha-mannosidase IA OS=Homo sapiens GN=MAN1A1 PE=1 SV=3	HUMAN	5	sp	P33908	MA1A1_HUMAN
360	4.36	4.36	25.27	14.08	14.08	sp|P98066|TSG6_HUMAN	Tumor necrosis factor-inducible gene 6 protein OS=Homo sapiens GN=TNFAIP6 PE=1 SV=2	HUMAN	4	sp	P98066	TSG6_HUMAN
361	4.33	4.33	30.5	21.24	13.51	sp|Q9Y680|FKBP7_HUMAN	Peptidyl-prolyl cis-trans isomerase FKBP7 OS=Homo sapiens GN=FKBP7 PE=1 SV=1	HUMAN	3	sp	Q9Y680	FKBP7_HUMAN
362	4.29	4.29	17.16	6.931	4.73	sp|O43184|ADA12_HUMAN	Disintegrin and metalloproteinase domain-containing protein 12 OS=Homo sapiens GN=ADAM12 PE=1 SV=3	HUMAN	3	sp	O43184	ADA12_HUMAN
363	4.29	4.29	37.5	19.85	19.85	sp|P61353|RL27_HUMAN	60S ribosomal protein L27 OS=Homo sapiens GN=RPL27 PE=1 SV=2	HUMAN	3	sp	P61353	RL27_HUMAN
364	4.25	4.25	36.41	17.51	17.51	sp|P62906|RL10A_HUMAN	60S ribosomal protein L10a OS=Homo sapiens GN=RPL10A PE=1 SV=2	HUMAN	4	sp	P62906	RL10A_HUMAN
365	4.24	4.24	28.37	16.28	16.28	sp|P09429|HMGB1_HUMAN	High mobility group protein B1 OS=Homo sapiens GN=HMGB1 PE=1 SV=3	HUMAN	3	sp	P09429	HMGB1_HUMAN
366	4.19	4.19	53.61	27.84	27.84	sp|P60903|S10AA_HUMAN	Protein S100-A10 OS=Homo sapiens GN=S100A10 PE=1 SV=2	HUMAN	3	sp	P60903	S10AA_HUMAN
367	4.17	4.17	35.09	15.6	8.257	tr|E9PRU1|E9PRU1_HUMAN	EGF-containing fibulin-like extracellular matrix protein 2 OS=Homo sapiens GN=EFEMP2 PE=1 SV=1	HUMAN	2	tr	E9PRU1	E9PRU1_HUMAN
368	4.11	4.11	35.32	14.68	11.47	sp|P10301|RRAS_HUMAN	Ras-related protein R-Ras OS=Homo sapiens GN=RRAS PE=1 SV=1	HUMAN	2	sp	P10301	RRAS_HUMAN
369	4.1	4.1	14.27	5.928	1.976	sp|P19827|ITIH1_HUMAN	Inter-alpha-trypsin inhibitor heavy chain H1 OS=Homo sapiens GN=ITIH1 PE=1 SV=3	HUMAN	2	sp	P19827	ITIH1_HUMAN
370	4.09	4.09	46.03	21.34	15.9	sp|Q9UL46|PSME2_HUMAN	Proteasome activator complex subunit 2 OS=Homo sapiens GN=PSME2 PE=1 SV=4	HUMAN	2	sp	Q9UL46	PSME2_HUMAN
371	4.05	4.05	52.63	26.32	25.26	tr|K7ERI7|K7ERI7_HUMAN	60S ribosomal protein L22 OS=Homo sapiens GN=RPL22 PE=1 SV=1	HUMAN	2	tr	K7ERI7	K7ERI7_HUMAN
372	4.05	4.05	18.26	13.69	13.69	sp|P78417|GSTO1_HUMAN	Glutathione S-transferase omega-1 OS=Homo sapiens GN=GSTO1 PE=1 SV=2	HUMAN	3	sp	P78417	GSTO1_HUMAN
373	4.04	4.04	23.25	12.89	9.524	sp|O00303|EIF3F_HUMAN	Eukaryotic translation initiation factor 3 subunit F OS=Homo sapiens GN=EIF3F PE=1 SV=1	HUMAN	2	sp	O00303	EIF3F_HUMAN
374	4.03	4.03	28.99	17.59	17.59	tr|A0A087X0I4|A0A087X0I4_HUMAN	Coatomer subunit epsilon OS=Homo sapiens GN=COPE PE=1 SV=1	HUMAN	2	tr	A0A087X0I4	A0A087X0I4_HUMAN
375	4.02	4.02	42.82	23.85	20.4	sp|P40121|CAPG_HUMAN	Macrophage-capping protein OS=Homo sapiens GN=CAPG PE=1 SV=2	HUMAN	4	sp	P40121	CAPG_HUMAN
376	4.02	4.02	40.82	15.51	15.51	tr|D6RD66|D6RD66_HUMAN	WD repeat-containing protein 1 (Fragment) OS=Homo sapiens GN=WDR1 PE=1 SV=1	HUMAN	2	tr	D6RD66	D6RD66_HUMAN
377	4.01	4.68	14.16	5.436	5.436	sp|P48740|MASP1_HUMAN	Mannan-binding lectin serine protease 1 OS=Homo sapiens GN=MASP1 PE=1 SV=3	HUMAN	3	sp	P48740	MASP1_HUMAN
378	4.01	4.01	27.26	5.017	5.017	tr|H7C410|H7C410_HUMAN	Glypican-1 (Fragment) OS=Homo sapiens GN=GPC1 PE=1 SV=1	HUMAN	2	tr	H7C410	H7C410_HUMAN
379	4.01	4.01	10.3	3.392	3.392	sp|Q96QK1|VPS35_HUMAN	Vacuolar protein sorting-associated protein 35 OS=Homo sapiens GN=VPS35 PE=1 SV=2	HUMAN	2	sp	Q96QK1	VPS35_HUMAN
380	4	185.29	81.14	81.14	78.33	tr|H0Y7Z1|H0Y7Z1_HUMAN	Fibronectin (Fragment) OS=Homo sapiens GN=FN1 PE=1 SV=1	HUMAN	298	tr	H0Y7Z1	H0Y7Z1_HUMAN
381	4	4	19.61	4.755	4.755	sp|P08133|ANXA6_HUMAN	Annexin A6 OS=Homo sapiens GN=ANXA6 PE=1 SV=3	HUMAN	2	sp	P08133	ANXA6_HUMAN
382	4	4	17.52	2.067	1.476	RRRRRsp|Q9Y6C2|EMIL1_HUMAN	REVERSED EMILIN-1 OS=Homo sapiens GN=EMILIN1 PE=1 SV=2	HUMAN	2	RRRRRsp	Q9Y6C2	EMIL1_HUMAN
383	4	4	18.38	4.12	4.12	tr|J3KPF3|J3KPF3_HUMAN	4F2 cell-surface antigen heavy chain OS=Homo sapiens GN=SLC3A2 PE=1 SV=1	HUMAN	2	tr	J3KPF3	J3KPF3_HUMAN
384	4	4	18.8	8.193	8.193	sp|P52597|HNRPF_HUMAN	Heterogeneous nuclear ribonucleoprotein F OS=Homo sapiens GN=HNRNPF PE=1 SV=3	HUMAN	2	sp	P52597	HNRPF_HUMAN
385	4	4	23.36	23.36	23.36	sp|P17096|HMGA1_HUMAN	High mobility group protein HMG-I/HMG-Y OS=Homo sapiens GN=HMGA1 PE=1 SV=3	HUMAN	2	sp	P17096	HMGA1_HUMAN
386	3.97	5.58	63.23	44.67	36.43	sp|P17936|IBP3_HUMAN	Insulin-like growth factor-binding protein 3 OS=Homo sapiens GN=IGFBP3 PE=1 SV=2	HUMAN	14	sp	P17936	IBP3_HUMAN
387	3.94	3.94	19.23	12.56	12.56	sp|P01137|TGFB1_HUMAN	Transforming growth factor beta-1 OS=Homo sapiens GN=TGFB1 PE=1 SV=2	HUMAN	4	sp	P01137	TGFB1_HUMAN
388	3.91	4.59	26.74	12.43	7.156	sp|P40227|TCPZ_HUMAN	T-complex protein 1 subunit zeta OS=Homo sapiens GN=CCT6A PE=1 SV=3	HUMAN	3	sp	P40227	TCPZ_HUMAN
389	3.91	3.91	38.02	22.31	17.77	tr|G3V5Q1|G3V5Q1_HUMAN	DNA-(apurinic or apyrimidinic site) lyase (Fragment) OS=Homo sapiens GN=APEX1 PE=1 SV=1	HUMAN	4	tr	G3V5Q1	G3V5Q1_HUMAN
390	3.9	3.92	52.21	28.68	19.85	sp|Q16695|H31T_HUMAN	Histone H3.1t OS=Homo sapiens GN=HIST3H3 PE=1 SV=3	HUMAN	4	sp	Q16695	H31T_HUMAN
391	3.89	3.89	26.6	14.56	7.767	sp|P11413|G6PD_HUMAN	Glucose-6-phosphate 1-dehydrogenase OS=Homo sapiens GN=G6PD PE=1 SV=4	HUMAN	3	sp	P11413	G6PD_HUMAN
392	3.87	4.5	11.12	4.512	3.987	sp|P53618|COPB_HUMAN	Coatomer subunit beta OS=Homo sapiens GN=COPB1 PE=1 SV=3	HUMAN	3	sp	P53618	COPB_HUMAN
393	3.83	3.83	26.47	20.22	17.28	sp|P24593|IBP5_HUMAN	Insulin-like growth factor-binding protein 5 OS=Homo sapiens GN=IGFBP5 PE=1 SV=1	HUMAN	5	sp	P24593	IBP5_HUMAN
394	3.81	5.04	15.11	6.401	4.407	sp|Q99460|PSMD1_HUMAN	26S proteasome non-ATPase regulatory subunit 1 OS=Homo sapiens GN=PSMD1 PE=1 SV=2	HUMAN	3	sp	Q99460	PSMD1_HUMAN
395	3.8	3.8	45.79	25.26	25.26	tr|J3QQ67|J3QQ67_HUMAN	60S ribosomal protein L18 (Fragment) OS=Homo sapiens GN=RPL18 PE=1 SV=1	HUMAN	4	tr	J3QQ67	J3QQ67_HUMAN
396	3.79	3.79	18.32	6.105	6.105	sp|Q96KP4|CNDP2_HUMAN	Cytosolic non-specific dipeptidase OS=Homo sapiens GN=CNDP2 PE=1 SV=2	HUMAN	2	sp	Q96KP4	CNDP2_HUMAN
397	3.74	3.76	17.75	15.94	9.42	sp|P28062|PSB8_HUMAN	Proteasome subunit beta type-8 OS=Homo sapiens GN=PSMB8 PE=1 SV=3	HUMAN	2	sp	P28062	PSB8_HUMAN
398	3.73	3.73	32.17	14.21	10.22	sp|O75718|CRTAP_HUMAN	Cartilage-associated protein OS=Homo sapiens GN=CRTAP PE=1 SV=1	HUMAN	4	sp	O75718	CRTAP_HUMAN
399	3.7	3.7	20.7	15.05	8.333	sp|O15143|ARC1B_HUMAN	Actin-related protein 2/3 complex subunit 1B OS=Homo sapiens GN=ARPC1B PE=1 SV=3	HUMAN	2	sp	O15143	ARC1B_HUMAN
400	3.68	3.68	32.68	10.13	8.17	tr|A0A087WZM2|A0A087WZM2_HUMAN	Ribonuclease T2 OS=Homo sapiens GN=RNASET2 PE=1 SV=1	HUMAN	2	tr	A0A087WZM2	A0A087WZM2_HUMAN
401	3.67	3.7	42.97	26.62	11.41	tr|C9J9K3|C9J9K3_HUMAN	40S ribosomal protein SA (Fragment) OS=Homo sapiens GN=RPSA PE=1 SV=4	HUMAN	2	tr	C9J9K3	C9J9K3_HUMAN
402	3.66	3.66	20.09	8.974	7.479	sp|Q96HE7|ERO1A_HUMAN	ERO1-like protein alpha OS=Homo sapiens GN=ERO1L PE=1 SV=2	HUMAN	3	sp	Q96HE7	ERO1A_HUMAN
403	3.65	3.65	10.33	4.34	3.733	sp|P27816|MAP4_HUMAN	Microtubule-associated protein 4 OS=Homo sapiens GN=MAP4 PE=1 SV=3	HUMAN	3	sp	P27816	MAP4_HUMAN
404	3.63	6.23	21	7.692	5.25	tr|E9PK47|E9PK47_HUMAN	Alpha-1,4 glucan phosphorylase OS=Homo sapiens GN=PYGL PE=1 SV=1	HUMAN	3	tr	E9PK47	E9PK47_HUMAN
405	3.57	3.57	13.62	13.62	13.62	tr|H0YHX9|H0YHX9_HUMAN	Nascent polypeptide-associated complex subunit alpha, muscle-specific form (Fragment) OS=Homo sapiens GN=NACA PE=1 SV=1	HUMAN	2	tr	H0YHX9	H0YHX9_HUMAN
406	3.55	3.55	48.48	21.89	13.13	sp|P46777|RL5_HUMAN	60S ribosomal protein L5 OS=Homo sapiens GN=RPL5 PE=1 SV=3	HUMAN	4	sp	P46777	RL5_HUMAN
407	3.54	3.54	33.33	19.75	11.52	sp|Q9BXJ0|C1QT5_HUMAN	Complement C1q tumor necrosis factor-related protein 5 OS=Homo sapiens GN=C1QTNF5 PE=1 SV=1	HUMAN	2	sp	Q9BXJ0	C1QT5_HUMAN
408	3.52	3.52	53.5	25.93	12.35	sp|P23396|RS3_HUMAN	40S ribosomal protein S3 OS=Homo sapiens GN=RPS3 PE=1 SV=2	HUMAN	3	sp	P23396	RS3_HUMAN
409	3.49	3.49	29.31	17	11.58	sp|Q9BS26|ERP44_HUMAN	Endoplasmic reticulum resident protein 44 OS=Homo sapiens GN=ERP44 PE=1 SV=1	HUMAN	3	sp	Q9BS26	ERP44_HUMAN
410	3.48	3.48	12.01	3.089	3.089	sp|Q9Y678|COPG1_HUMAN	Coatomer subunit gamma-1 OS=Homo sapiens GN=COPG1 PE=1 SV=1	HUMAN	2	sp	Q9Y678	COPG1_HUMAN
411	3.45	3.63	20.85	9.514	7.085	sp|O60701|UGDH_HUMAN	UDP-glucose 6-dehydrogenase OS=Homo sapiens GN=UGDH PE=1 SV=1	HUMAN	3	sp	O60701	UGDH_HUMAN
412	3.42	3.45	12.44	9.778	9.778	sp|P24534|EF1B_HUMAN	Elongation factor 1-beta OS=Homo sapiens GN=EEF1B2 PE=1 SV=3	HUMAN	2	sp	P24534	EF1B_HUMAN
413	3.41	26.79	55.28	39.44	36.97	sp|P09493|TPM1_HUMAN	Tropomyosin alpha-1 chain OS=Homo sapiens GN=TPM1 PE=1 SV=2	HUMAN	13	sp	P09493	TPM1_HUMAN
414	3.4	3.52	34.44	17.01	14.52	sp|O00299|CLIC1_HUMAN	Chloride intracellular channel protein 1 OS=Homo sapiens GN=CLIC1 PE=1 SV=4	HUMAN	3	sp	O00299	CLIC1_HUMAN
415	3.38	3.38	18.73	3.462	2.554	sp|Q8N6G6|ATL1_HUMAN	ADAMTS-like protein 1 OS=Homo sapiens GN=ADAMTSL1 PE=1 SV=4	HUMAN	3	sp	Q8N6G6	ATL1_HUMAN
416	3.38	3.38	43.52	21.93	18.6	tr|B1AK88|B1AK88_HUMAN	Capping protein (Actin filament) muscle Z-line, beta, isoform CRA_d OS=Homo sapiens GN=CAPZB PE=1 SV=1	HUMAN	4	tr	B1AK88	B1AK88_HUMAN
417	3.36	3.36	24.69	4.872	3.22	sp|O95450|ATS2_HUMAN	A disintegrin and metalloproteinase with thrombospondin motifs 2 OS=Homo sapiens GN=ADAMTS2 PE=2 SV=2	HUMAN	2	sp	O95450	ATS2_HUMAN
418	3.36	3.36	36.32	12.56	12.56	sp|O15173|PGRC2_HUMAN	Membrane-associated progesterone receptor component 2 OS=Homo sapiens GN=PGRMC2 PE=1 SV=1	HUMAN	3	sp	O15173	PGRC2_HUMAN
419	3.35	3.35	19.57	8.719	7.117	sp|P36871|PGM1_HUMAN	Phosphoglucomutase-1 OS=Homo sapiens GN=PGM1 PE=1 SV=3	HUMAN	2	sp	P36871	PGM1_HUMAN
420	3.33	3.33	22.82	9.091	7.792	sp|P50991|TCPD_HUMAN	T-complex protein 1 subunit delta OS=Homo sapiens GN=CCT4 PE=1 SV=4	HUMAN	2	sp	P50991	TCPD_HUMAN
421	3.33	3.33	37.76	15.82	15.82	tr|A2ACR1|A2ACR1_HUMAN	Proteasome subunit beta type OS=Homo sapiens GN=PSMB9 PE=1 SV=1	HUMAN	2	tr	A2ACR1	A2ACR1_HUMAN
422	3.31	3.31	30.46	15.89	15.89	sp|P62263|RS14_HUMAN	40S ribosomal protein S14 OS=Homo sapiens GN=RPS14 PE=1 SV=3	HUMAN	2	sp	P62263	RS14_HUMAN
423	3.29	3.29	28.98	9.541	9.541	tr|A0A0A0MT32|A0A0A0MT32_HUMAN	Lysosomal acid lipase/cholesteryl ester hydrolase OS=Homo sapiens GN=LIPA PE=1 SV=1	HUMAN	2	tr	A0A0A0MT32	A0A0A0MT32_HUMAN
424	3.26	3.7	17.29	8.448	4.322	tr|H3BS10|H3BS10_HUMAN	Beta-hexosaminidase OS=Homo sapiens GN=HEXA PE=1 SV=1	HUMAN	2	tr	H3BS10	H3BS10_HUMAN
425	3.24	72	38.32	29	28.87	tr|A0A087WWA5|A0A087WWA5_HUMAN	Tenascin-X OS=Homo sapiens GN=TNXB PE=1 SV=1	HUMAN	40	tr	A0A087WWA5	A0A087WWA5_HUMAN
426	3.24	3.26	16.27	3.527	2.503	sp|O00462|MANBA_HUMAN	Beta-mannosidase OS=Homo sapiens GN=MANBA PE=1 SV=3	HUMAN	2	sp	O00462	MANBA_HUMAN
427	3.2	3.2	25.17	20.98	9.79	sp|P52907|CAZA1_HUMAN	F-actin-capping protein subunit alpha-1 OS=Homo sapiens GN=CAPZA1 PE=1 SV=3	HUMAN	2	sp	P52907	CAZA1_HUMAN
428	3.2	3.2	14.39	9.848	9.848	sp|P40261|NNMT_HUMAN	Nicotinamide N-methyltransferase OS=Homo sapiens GN=NNMT PE=1 SV=1	HUMAN	3	sp	P40261	NNMT_HUMAN
429	3.19	3.19	36.47	17.06	10.59	tr|H0YKD8|H0YKD8_HUMAN	60S ribosomal protein L28 OS=Homo sapiens GN=RPL28 PE=1 SV=1	HUMAN	2	tr	H0YKD8	H0YKD8_HUMAN
430	3.17	3.17	36.33	20.9	14.15	sp|Q641Q3|METRL_HUMAN	Meteorin-like protein OS=Homo sapiens GN=METRNL PE=2 SV=1	HUMAN	3	sp	Q641Q3	METRL_HUMAN
431	3.13	3.14	59.74	24.03	24.03	sp|P68036|UB2L3_HUMAN	Ubiquitin-conjugating enzyme E2 L3 OS=Homo sapiens GN=UBE2L3 PE=1 SV=1	HUMAN	2	sp	P68036	UB2L3_HUMAN
432	3.11	3.11	20.73	5.95	5.95	tr|D6REB5|D6REB5_HUMAN	Alpha-L-iduronidase OS=Homo sapiens GN=IDUA PE=1 SV=1	HUMAN	2	tr	D6REB5	D6REB5_HUMAN
433	3.11	3.11	33.14	11.34	7.558	sp|P19883|FST_HUMAN	Follistatin OS=Homo sapiens GN=FST PE=1 SV=2	HUMAN	2	sp	P19883	FST_HUMAN
434	3.1	3.1	17.98	4.128	2.663	sp|Q99985|SEM3C_HUMAN	Semaphorin-3C OS=Homo sapiens GN=SEMA3C PE=1 SV=2	HUMAN	2	sp	Q99985	SEM3C_HUMAN
435	3.09	3.09	16.59	12.23	12.23	sp|P68402|PA1B2_HUMAN	Platelet-activating factor acetylhydrolase IB subunit beta OS=Homo sapiens GN=PAFAH1B2 PE=1 SV=1	HUMAN	2	sp	P68402	PA1B2_HUMAN
436	3.07	3.07	38.39	9.761	8.46	sp|P13489|RINI_HUMAN	Ribonuclease inhibitor OS=Homo sapiens GN=RNH1 PE=1 SV=2	HUMAN	2	sp	P13489	RINI_HUMAN
437	3.06	3.06	12.32	4.98	3.67	sp|Q06481|APLP2_HUMAN	Amyloid-like protein 2 OS=Homo sapiens GN=APLP2 PE=1 SV=2	HUMAN	2	sp	Q06481	APLP2_HUMAN
438	3.06	3.06	8.483	7.198	7.198	sp|Q15008|PSMD6_HUMAN	26S proteasome non-ATPase regulatory subunit 6 OS=Homo sapiens GN=PSMD6 PE=1 SV=1	HUMAN	2	sp	Q15008	PSMD6_HUMAN
439	3.05	3.05	8.833	1.661	1.661	sp|P46821|MAP1B_HUMAN	Microtubule-associated protein 1B OS=Homo sapiens GN=MAP1B PE=1 SV=2	HUMAN	2	sp	P46821	MAP1B_HUMAN
440	3.02	3.02	35.81	14.32	6.905	sp|P38159|RBMX_HUMAN	RNA-binding motif protein, X chromosome OS=Homo sapiens GN=RBMX PE=1 SV=3	HUMAN	2	sp	P38159	RBMX_HUMAN
441	3	3.18	16.2	13.38	9.155	sp|P26885|FKBP2_HUMAN	Peptidyl-prolyl cis-trans isomerase FKBP2 OS=Homo sapiens GN=FKBP2 PE=1 SV=2	HUMAN	2	sp	P26885	FKBP2_HUMAN
442	3	3.03	18.87	7.324	7.324	sp|P04899|GNAI2_HUMAN	Guanine nucleotide-binding protein G(i) subunit alpha-2 OS=Homo sapiens GN=GNAI2 PE=1 SV=3	HUMAN	2	sp	P04899	GNAI2_HUMAN
443	2.99	3	30.39	8.824	5.147	sp|P05455|LA_HUMAN	Lupus La protein OS=Homo sapiens GN=SSB PE=1 SV=2	HUMAN	2	sp	P05455	LA_HUMAN
444	2.99	2.99	18.4	4.354	3.371	tr|A0AVL1|A0AVL1_HUMAN	ADAM9 protein OS=Homo sapiens GN=ADAM9 PE=1 SV=1	HUMAN	2	tr	A0AVL1	A0AVL1_HUMAN
445	2.98	2.98	24	19.11	19.11	tr|H0YDJ9|H0YDJ9_HUMAN	Tetraspanin (Fragment) OS=Homo sapiens GN=CD81 PE=1 SV=1	HUMAN	3	tr	H0YDJ9	H0YDJ9_HUMAN
446	2.96	3.07	47.43	27.67	7.905	sp|Q9Y696|CLIC4_HUMAN	Chloride intracellular channel protein 4 OS=Homo sapiens GN=CLIC4 PE=1 SV=4	HUMAN	2	sp	Q9Y696	CLIC4_HUMAN
447	2.95	2.95	17.89	5.687	4.854	sp|Q14393|GAS6_HUMAN	Growth arrest-specific protein 6 OS=Homo sapiens GN=GAS6 PE=1 SV=2	HUMAN	2	sp	Q14393	GAS6_HUMAN
448	2.94	3	7.517	5.769	4.72	sp|Q14956|GPNMB_HUMAN	Transmembrane glycoprotein NMB OS=Homo sapiens GN=GPNMB PE=1 SV=2	HUMAN	2	sp	Q14956	GPNMB_HUMAN
449	2.91	2.91	44.83	17.24	11.03	sp|P39019|RS19_HUMAN	40S ribosomal protein S19 OS=Homo sapiens GN=RPS19 PE=1 SV=2	HUMAN	2	sp	P39019	RS19_HUMAN
450	2.9	4.86	33.49	23.58	17.45	sp|P45877|PPIC_HUMAN	Peptidyl-prolyl cis-trans isomerase C OS=Homo sapiens GN=PPIC PE=1 SV=1	HUMAN	4	sp	P45877	PPIC_HUMAN
451	2.86	2.86	26.12	6.742	6.742	sp|Q15365|PCBP1_HUMAN	Poly(rC)-binding protein 1 OS=Homo sapiens GN=PCBP1 PE=1 SV=2	HUMAN	2	sp	Q15365	PCBP1_HUMAN
452	2.86	2.86	30.43	30.43	30.43	sp|P62857|RS28_HUMAN	40S ribosomal protein S28 OS=Homo sapiens GN=RPS28 PE=1 SV=1	HUMAN	2	sp	P62857	RS28_HUMAN
453	2.83	7.16	41.06	24.8	18.7	sp|Q04917|1433F_HUMAN	14-3-3 protein eta OS=Homo sapiens GN=YWHAH PE=1 SV=4	HUMAN	5	sp	Q04917	1433F_HUMAN
454	2.82	2.82	16.35	5.732	5.732	sp|P48723|HSP13_HUMAN	Heat shock 70 kDa protein 13 OS=Homo sapiens GN=HSPA13 PE=1 SV=1	HUMAN	2	sp	P48723	HSP13_HUMAN
455	2.79	2.79	40.66	26.92	17.58	sp|P55145|MANF_HUMAN	Mesencephalic astrocyte-derived neurotrophic factor OS=Homo sapiens GN=MANF PE=1 SV=3	HUMAN	2	sp	P55145	MANF_HUMAN
456	2.79	2.79	50	17.53	17.53	sp|P62081|RS7_HUMAN	40S ribosomal protein S7 OS=Homo sapiens GN=RPS7 PE=1 SV=1	HUMAN	2	sp	P62081	RS7_HUMAN
457	2.79	2.79	42.13	19.44	13.89	sp|P51148|RAB5C_HUMAN	Ras-related protein Rab-5C OS=Homo sapiens GN=RAB5C PE=1 SV=2	HUMAN	2	sp	P51148	RAB5C_HUMAN
458	2.79	2.79	20.69	20.69	16.09	sp|Q9Y5S9|RBM8A_HUMAN	RNA-binding protein 8A OS=Homo sapiens GN=RBM8A PE=1 SV=1	HUMAN	2	sp	Q9Y5S9	RBM8A_HUMAN
459	2.77	2.77	38.94	17.31	8.173	tr|A8MUD9|A8MUD9_HUMAN	60S ribosomal protein L7 OS=Homo sapiens GN=RPL7 PE=1 SV=1	HUMAN	2	tr	A8MUD9	A8MUD9_HUMAN
460	2.72	2.72	13.35	5.302	3.656	sp|P22307|NLTP_HUMAN	Non-specific lipid-transfer protein OS=Homo sapiens GN=SCP2 PE=1 SV=2	HUMAN	2	sp	P22307	NLTP_HUMAN
462	2.69	2.69	25.65	21.47	15.71	sp|P60953|CDC42_HUMAN	Cell division control protein 42 homolog OS=Homo sapiens GN=CDC42 PE=1 SV=2	HUMAN	2	sp	P60953	CDC42_HUMAN
463	2.69	2.69	15.94	5.217	5.217	sp|P02749|APOH_HUMAN	Beta-2-glycoprotein 1 OS=Homo sapiens GN=APOH PE=1 SV=3	HUMAN	2	sp	P02749	APOH_HUMAN
464	2.68	2.68	27.59	13.79	13.79	sp|Q14847|LASP1_HUMAN	LIM and SH3 domain protein 1 OS=Homo sapiens GN=LASP1 PE=1 SV=2	HUMAN	3	sp	Q14847	LASP1_HUMAN
465	2.67	2.67	32.7	18.01	11.85	sp|P35625|TIMP3_HUMAN	Metalloproteinase inhibitor 3 OS=Homo sapiens GN=TIMP3 PE=1 SV=2	HUMAN	2	sp	P35625	TIMP3_HUMAN
466	2.67	2.67	41.14	15.82	10.76	sp|P62280|RS11_HUMAN	40S ribosomal protein S11 OS=Homo sapiens GN=RPS11 PE=1 SV=3	HUMAN	2	sp	P62280	RS11_HUMAN
467	2.65	2.65	20.99	7.949	3.816	sp|P17405|ASM_HUMAN	Sphingomyelin phosphodiesterase OS=Homo sapiens GN=SMPD1 PE=1 SV=4	HUMAN	2	sp	P17405	ASM_HUMAN
468	2.63	2.63	17.26	3.581	3.581	tr|A0A0A0MSM0|A0A0A0MSM0_HUMAN	Heat shock protein 105 kDa OS=Homo sapiens GN=HSPH1 PE=1 SV=1	HUMAN	2	tr	A0A0A0MSM0	A0A0A0MSM0_HUMAN
469	2.62	2.62	19.3	19.3	19.3	sp|P05386|RLA1_HUMAN	60S acidic ribosomal protein P1 OS=Homo sapiens GN=RPLP1 PE=1 SV=1	HUMAN	2	sp	P05386	RLA1_HUMAN
470	2.61	2.61	24.02	7.821	7.821	sp|Q9UBS4|DJB11_HUMAN	DnaJ homolog subfamily B member 11 OS=Homo sapiens GN=DNAJB11 PE=1 SV=1	HUMAN	2	sp	Q9UBS4	DJB11_HUMAN
471	2.6	2.6	46.38	28.5	10.14	sp|P51149|RAB7A_HUMAN	Ras-related protein Rab-7a OS=Homo sapiens GN=RAB7A PE=1 SV=1	HUMAN	2	sp	P51149	RAB7A_HUMAN
472	2.6	2.6	20.93	15.89	15.89	sp|P22692|IBP4_HUMAN	Insulin-like growth factor-binding protein 4 OS=Homo sapiens GN=IGFBP4 PE=1 SV=2	HUMAN	4	sp	P22692	IBP4_HUMAN
473	2.59	2.59	29.39	10.3	10.3	tr|A0A087WZH7|A0A087WZH7_HUMAN	Myristoylated alanine-rich C-kinase substrate OS=Homo sapiens GN=MARCKS PE=1 SV=1	HUMAN	2	tr	A0A087WZH7	A0A087WZH7_HUMAN
474	2.58	2.58	23.97	13.88	9.148	sp|P02649|APOE_HUMAN	Apolipoprotein E OS=Homo sapiens GN=APOE PE=1 SV=1	HUMAN	3	sp	P02649	APOE_HUMAN
475	2.57	2.57	21.88	13.39	13.39	sp|Q6P587|FAHD1_HUMAN	Acylpyruvase FAHD1, mitochondrial OS=Homo sapiens GN=FAHD1 PE=1 SV=2	HUMAN	2	sp	Q6P587	FAHD1_HUMAN
476	2.55	2.56	42.21	15.57	9.836	sp|Q9Y224|CN166_HUMAN	UPF0568 protein C14orf166 OS=Homo sapiens GN=C14orf166 PE=1 SV=1	HUMAN	2	sp	Q9Y224	CN166_HUMAN
479	2.5	2.53	20.82	13.88	13.88	sp|P56537|IF6_HUMAN	Eukaryotic translation initiation factor 6 OS=Homo sapiens GN=EIF6 PE=1 SV=1	HUMAN	2	sp	P56537	IF6_HUMAN
480	2.5	2.5	26.5	6.268	6.268	tr|H0YN65|H0YN65_HUMAN	Carbohydrate sulfotransferase 14 OS=Homo sapiens GN=CHST14 PE=1 SV=1	HUMAN	2	tr	H0YN65	H0YN65_HUMAN
481	2.5	2.5	48.12	21.25	21.25	sp|O14558|HSPB6_HUMAN	Heat shock protein beta-6 OS=Homo sapiens GN=HSPB6 PE=1 SV=2	HUMAN	3	sp	O14558	HSPB6_HUMAN
482	2.49	2.49	32.26	14.19	14.19	tr|C9J0K6|C9J0K6_HUMAN	Sorcin OS=Homo sapiens GN=SRI PE=1 SV=1	HUMAN	2	tr	C9J0K6	C9J0K6_HUMAN
483	2.47	2.55	29.07	16.3	11.01	sp|O43809|CPSF5_HUMAN	Cleavage and polyadenylation specificity factor subunit 5 OS=Homo sapiens GN=NUDT21 PE=1 SV=1	HUMAN	2	sp	O43809	CPSF5_HUMAN
484	2.46	2.46	18	4.305	4.305	sp|P48444|COPD_HUMAN	Coatomer subunit delta OS=Homo sapiens GN=ARCN1 PE=1 SV=1	HUMAN	2	sp	P48444	COPD_HUMAN
486	2.45	2.45	34.21	19.47	14.21	tr|F8VY04|F8VY04_HUMAN	Adenylate kinase 2, mitochondrial OS=Homo sapiens GN=AK2 PE=1 SV=1	HUMAN	2	tr	F8VY04	F8VY04_HUMAN
487	2.43	2.79	21.22	11.46	8.049	sp|P43034|LIS1_HUMAN	Platelet-activating factor acetylhydrolase IB subunit alpha OS=Homo sapiens GN=PAFAH1B1 PE=1 SV=2	HUMAN	2	sp	P43034	LIS1_HUMAN
488	2.43	2.43	12.23	12.23	12.23	tr|G5E9Q6|G5E9Q6_HUMAN	Profilin OS=Homo sapiens GN=PFN2 PE=1 SV=1	HUMAN	2	tr	G5E9Q6	G5E9Q6_HUMAN
489	2.42	2.42	11.72	5.139	2.775	sp|P19021|AMD_HUMAN	Peptidyl-glycine alpha-amidating monooxygenase OS=Homo sapiens GN=PAM PE=1 SV=2	HUMAN	2	sp	P19021	AMD_HUMAN
490	2.42	2.42	25.58	11.63	11.63	sp|P50914|RL14_HUMAN	60S ribosomal protein L14 OS=Homo sapiens GN=RPL14 PE=1 SV=4	HUMAN	2	sp	P50914	RL14_HUMAN
491	2.42	2.42	59.38	31.25	31.25	tr|E9PP21|E9PP21_HUMAN	Cysteine and glycine-rich protein 1 OS=Homo sapiens GN=CSRP1 PE=1 SV=1	HUMAN	3	tr	E9PP21	E9PP21_HUMAN
493	2.4	7.1	50.2	25.71	19.59	sp|P27348|1433T_HUMAN	14-3-3 protein theta OS=Homo sapiens GN=YWHAQ PE=1 SV=1	HUMAN	6	sp	P27348	1433T_HUMAN
494	2.39	2.39	42.03	25.36	18.12	tr|J3QS96|J3QS96_HUMAN	60S ribosomal protein L17 (Fragment) OS=Homo sapiens GN=RPL17 PE=1 SV=1	HUMAN	2	tr	J3QS96	J3QS96_HUMAN
495	2.39	2.39	25.12	9.005	9.005	sp|O95816|BAG2_HUMAN	BAG family molecular chaperone regulator 2 OS=Homo sapiens GN=BAG2 PE=1 SV=1	HUMAN	2	sp	O95816	BAG2_HUMAN
496	2.36	89.21	69.43	62.5	58.54	tr|B1ALD9|B1ALD9_HUMAN	Periostin OS=Homo sapiens GN=POSTN PE=1 SV=1	HUMAN	102	tr	B1ALD9	B1ALD9_HUMAN
497	2.36	2.36	37.65	27.06	18.82	tr|R4GN98|R4GN98_HUMAN	Protein S100 (Fragment) OS=Homo sapiens GN=S100A6 PE=1 SV=1	HUMAN	2	tr	R4GN98	R4GN98_HUMAN
502	2.3	2.3	16.54	5.251	5.251	sp|Q14118|DAG1_HUMAN	Dystroglycan OS=Homo sapiens GN=DAG1 PE=1 SV=2	HUMAN	3	sp	Q14118	DAG1_HUMAN
503	2.28	2.32	23.49	19.88	9.639	sp|Q53FA7|QORX_HUMAN	Quinone oxidoreductase PIG3 OS=Homo sapiens GN=TP53I3 PE=1 SV=2	HUMAN	3	sp	Q53FA7	QORX_HUMAN
504	2.28	2.28	48.98	30.61	30.61	sp|Q99584|S10AD_HUMAN	Protein S100-A13 OS=Homo sapiens GN=S100A13 PE=1 SV=1	HUMAN	3	sp	Q99584	S10AD_HUMAN
506	2.26	2.26	13.87	13.87	13.87	sp|Q6UWF9|F180A_HUMAN	Protein FAM180A OS=Homo sapiens GN=FAM180A PE=2 SV=1	HUMAN	2	sp	Q6UWF9	F180A_HUMAN
509	2.22	2.22	32.04	12.62	12.62	sp|P20290|BTF3_HUMAN	Transcription factor BTF3 OS=Homo sapiens GN=BTF3 PE=1 SV=1	HUMAN	2	sp	P20290	BTF3_HUMAN
510	2.19	2.74	20.73	5.872	2.936	sp|P49368|TCPG_HUMAN	T-complex protein 1 subunit gamma OS=Homo sapiens GN=CCT3 PE=1 SV=4	HUMAN	2	sp	P49368	TCPG_HUMAN
517	2.1	2.14	31.13	13.21	7.233	tr|G5EA09|G5EA09_HUMAN	Syndecan binding protein (Syntenin), isoform CRA_a OS=Homo sapiens GN=SDCBP PE=1 SV=1	HUMAN	2	tr	G5EA09	G5EA09_HUMAN
521	2.09	2.99	17.23	5.322	5.322	tr|E9PG40|E9PG40_HUMAN	Amyloid beta A4 protein OS=Homo sapiens GN=APP PE=1 SV=1	HUMAN	3	tr	E9PG40	E9PG40_HUMAN
524	2.07	2.07	11.68	3.544	2.208	sp|Q14766|LTBP1_HUMAN	Latent-transforming growth factor beta-binding protein 1 OS=Homo sapiens GN=LTBP1 PE=1 SV=4	HUMAN	2	sp	Q14766	LTBP1_HUMAN
525	2.07	2.07	18.34	5.523	5.523	sp|Q7Z4H8|KDEL2_HUMAN	KDEL motif-containing protein 2 OS=Homo sapiens GN=KDELC2 PE=1 SV=2	HUMAN	2	sp	Q7Z4H8	KDEL2_HUMAN
526	2.07	2.07	15.27	8.368	2.72	tr|J3KNF6|J3KNF6_HUMAN	RGM domain family member B OS=Homo sapiens GN=RGMB PE=1 SV=1	HUMAN	2	tr	J3KNF6	J3KNF6_HUMAN
534	2.04	2.06	11.91	1.998	1.439	tr|D6REX3|D6REX3_HUMAN	Protein transport protein Sec31A OS=Homo sapiens GN=SEC31A PE=1 SV=1	HUMAN	2	tr	D6REX3	D6REX3_HUMAN
538	2.03	3.03	27.11	5.861	5.861	tr|B8ZZZ0|B8ZZZ0_HUMAN	3-hydroxyisobutyryl-CoA hydrolase, mitochondrial (Fragment) OS=Homo sapiens GN=HIBCH PE=1 SV=1	HUMAN	2	tr	B8ZZZ0	B8ZZZ0_HUMAN
546	2.02	2.24	38.2	21.72	12.36	sp|P02647|APOA1_HUMAN	Apolipoprotein A-I OS=Homo sapiens GN=APOA1 PE=1 SV=1	HUMAN	3	sp	P02647	APOA1_HUMAN
552	2.01	4.12	7.081	0.5501	0.5501	sp|Q96RW7|HMCN1_HUMAN	Hemicentin-1 OS=Homo sapiens GN=HMCN1 PE=1 SV=2	HUMAN	3	sp	Q96RW7	HMCN1_HUMAN
553	2.01	3.04	25.17	15.73	9.79	sp|P47755|CAZA2_HUMAN	F-actin-capping protein subunit alpha-2 OS=Homo sapiens GN=CAPZA2 PE=1 SV=3	HUMAN	2	sp	P47755	CAZA2_HUMAN
565	2.01	2.01	25	11.96	11.96	sp|P62304|RUXE_HUMAN	Small nuclear ribonucleoprotein E OS=Homo sapiens GN=SNRPE PE=1 SV=1	HUMAN	2	sp	P62304	RUXE_HUMAN
566	2	25.71	60.75	43.68	41.91	sp|Q71U36|TBA1A_HUMAN	Tubulin alpha-1A chain OS=Homo sapiens GN=TUBA1A PE=1 SV=1	HUMAN	14	sp	Q71U36	TBA1A_HUMAN
567	2	15.55	64.47	64.47	64.47	sp|P15531|NDKA_HUMAN	Nucleoside diphosphate kinase A OS=Homo sapiens GN=NME1 PE=1 SV=1	HUMAN	10	sp	P15531	NDKA_HUMAN
568	2	6.8	43.32	24.7	18.62	sp|P61981|1433G_HUMAN	14-3-3 protein gamma OS=Homo sapiens GN=YWHAG PE=1 SV=2	HUMAN	5	sp	P61981	1433G_HUMAN
569	2	4	11.39	5.907	5.907	tr|H3BPA5|H3BPA5_HUMAN	Ras-related protein Rab-40C (Fragment) OS=Homo sapiens GN=RAB40C PE=1 SV=1	HUMAN	2	tr	H3BPA5	H3BPA5_HUMAN
570	2	3.01	8.741	2.273	2.273	sp|Q16706|MA2A1_HUMAN	Alpha-mannosidase 2 OS=Homo sapiens GN=MAN2A1 PE=1 SV=2	HUMAN	2	sp	Q16706	MA2A1_HUMAN
571	2	2.73	13.24	4.223	4.223	sp|O00629|IMA3_HUMAN	Importin subunit alpha-3 OS=Homo sapiens GN=KPNA4 PE=1 SV=1	HUMAN	2	sp	O00629	IMA3_HUMAN
572	2	2.69	17.17	6.627	6.627	tr|R4GMT0|R4GMT0_HUMAN	Alpha-centractin OS=Homo sapiens GN=ACTR1A PE=1 SV=1	HUMAN	2	tr	R4GMT0	R4GMT0_HUMAN
573	2	2.54	13.49	3.583	2.74	sp|Q10567|AP1B1_HUMAN	AP-1 complex subunit beta-1 OS=Homo sapiens GN=AP1B1 PE=1 SV=2	HUMAN	2	sp	Q10567	AP1B1_HUMAN
575	2	2.01	12.08	0.9536	0.9536	sp|A1L4H1|SRCRL_HUMAN	Soluble scavenger receptor cysteine-rich domain-containing protein SSC5D OS=Homo sapiens GN=SSC5D PE=2 SV=3	HUMAN	2	sp	A1L4H1	SRCRL_HUMAN
597	1.95	1.95	11.24	2.317	2.317	sp|Q13444|ADA15_HUMAN	Disintegrin and metalloproteinase domain-containing protein 15 OS=Homo sapiens GN=ADAM15 PE=1 SV=4	HUMAN	2	sp	Q13444	ADA15_HUMAN
600	1.93	3.97	16.34	8.609	5.298	sp|P83110|HTRA3_HUMAN	Serine protease HTRA3 OS=Homo sapiens GN=HTRA3 PE=1 SV=2	HUMAN	2	sp	P83110	HTRA3_HUMAN
604	1.89	1.89	16.55	5.995	5.995	sp|P11279|LAMP1_HUMAN	Lysosome-associated membrane glycoprotein 1 OS=Homo sapiens GN=LAMP1 PE=1 SV=3	HUMAN	2	sp	P11279	LAMP1_HUMAN
606	1.86	3.34	25.54	11.51	2.878	sp|P17987|TCPA_HUMAN	T-complex protein 1 subunit alpha OS=Homo sapiens GN=TCP1 PE=1 SV=1	HUMAN	2	sp	P17987	TCPA_HUMAN
609	1.81	1.85	20.86	9.143	9.143	sp|Q12792|TWF1_HUMAN	Twinfilin-1 OS=Homo sapiens GN=TWF1 PE=1 SV=3	HUMAN	2	sp	Q12792	TWF1_HUMAN
614	1.77	1.77	7.489	7.489	7.489	sp|P00403|COX2_HUMAN	Cytochrome c oxidase subunit 2 OS=Homo sapiens GN=MT-CO2 PE=1 SV=1	HUMAN	2	sp	P00403	COX2_HUMAN
616	1.74	1.74	25.95	13.92	6.646	sp|P15121|ALDR_HUMAN	Aldose reductase OS=Homo sapiens GN=AKR1B1 PE=1 SV=3	HUMAN	2	sp	P15121	ALDR_HUMAN
618	1.67	2.75	18.39	3.065	3.065	tr|J9JID7|J9JID7_HUMAN	Lamin B2, isoform CRA_a OS=Homo sapiens GN=LMNB2 PE=1 SV=1	HUMAN	2	tr	J9JID7	J9JID7_HUMAN
619	1.67	1.67	15.23	2.83	2.83	sp|P16070|CD44_HUMAN	CD44 antigen OS=Homo sapiens GN=CD44 PE=1 SV=3	HUMAN	2	sp	P16070	CD44_HUMAN
621	1.63	8.26	62.65	43.98	27.11	sp|Q9Y281|COF2_HUMAN	Cofilin-2 OS=Homo sapiens GN=CFL2 PE=1 SV=1	HUMAN	4	sp	Q9Y281	COF2_HUMAN
622	1.63	1.63	21.68	6.486	4.856	sp|Q09666|AHNK_HUMAN	Neuroblast differentiation-associated protein AHNAK OS=Homo sapiens GN=AHNAK PE=1 SV=2	HUMAN	5	sp	Q09666	AHNK_HUMAN
623	1.62	3.03	30.54	14.78	11.33	sp|P51153|RAB13_HUMAN	Ras-related protein Rab-13 OS=Homo sapiens GN=RAB13 PE=1 SV=1	HUMAN	2	sp	P51153	RAB13_HUMAN
624	1.62	1.63	68.09	23.4	11.17	tr|Q5W0H4|Q5W0H4_HUMAN	Translationally-controlled tumor protein OS=Homo sapiens GN=TPT1 PE=1 SV=1	HUMAN	3	tr	Q5W0H4	Q5W0H4_HUMAN
627	1.61	1.61	7.473	4.389	2.847	sp|P10643|CO7_HUMAN	Complement component C7 OS=Homo sapiens GN=C7 PE=1 SV=2	HUMAN	2	sp	P10643	CO7_HUMAN
633	1.51	1.51	9.843	4.139	2.796	sp|Q12906|ILF3_HUMAN	Interleukin enhancer-binding factor 3 OS=Homo sapiens GN=ILF3 PE=1 SV=3	HUMAN	2	sp	Q12906	ILF3_HUMAN
637	1.47	1.9	13.46	7.339	5.505	sp|O75436|VP26A_HUMAN	Vacuolar protein sorting-associated protein 26A OS=Homo sapiens GN=VPS26A PE=1 SV=2	HUMAN	2	sp	O75436	VP26A_HUMAN
638	1.46	19.9	45.17	35.73	28.09	sp|P68371|TBB4B_HUMAN	Tubulin beta-4B chain OS=Homo sapiens GN=TUBB4B PE=1 SV=1	HUMAN	15	sp	P68371	TBB4B_HUMAN
642	1.44	1.44	13.33	10	10	sp|P18085|ARF4_HUMAN	ADP-ribosylation factor 4 OS=Homo sapiens GN=ARF4 PE=1 SV=3	HUMAN	2	sp	P18085	ARF4_HUMAN
664	1.23	1.23	33.72	13.03	5.364	sp|Q99714|HCD2_HUMAN	3-hydroxyacyl-CoA dehydrogenase type-2 OS=Homo sapiens GN=HSD17B10 PE=1 SV=3	HUMAN	2	sp	Q99714	HCD2_HUMAN
668	1.21	1.21	42.36	15.97	15.97	sp|P47813|IF1AX_HUMAN	Eukaryotic translation initiation factor 1A, X-chromosomal OS=Homo sapiens GN=EIF1AX PE=1 SV=2	HUMAN	2	sp	P47813	IF1AX_HUMAN
676	1.16	1.16	15.97	8.333	6.25	sp|P23526|SAHH_HUMAN	Adenosylhomocysteinase OS=Homo sapiens GN=AHCY PE=1 SV=4	HUMAN	2	sp	P23526	SAHH_HUMAN
690	1.04	62.38	71.25	68.99	58.11	tr|Q3BDU5|Q3BDU5_HUMAN	Prelamin-A/C OS=Homo sapiens GN=LMNA PE=1 SV=1	HUMAN	37	tr	Q3BDU5	Q3BDU5_HUMAN
691	1.04	1.05	27.79	15.11	10.57	sp|Q9Y266|NUDC_HUMAN	Nuclear migration protein nudC OS=Homo sapiens GN=NUDC PE=1 SV=1	HUMAN	3	sp	Q9Y266	NUDC_HUMAN
692	1.03	2.05	18.72	12.3	9.626	sp|Q96SL4|GPX7_HUMAN	Glutathione peroxidase 7 OS=Homo sapiens GN=GPX7 PE=1 SV=1	HUMAN	2	sp	Q96SL4	GPX7_HUMAN
708	0.92	2.73	29.3	12.09	12.09	sp|P61106|RAB14_HUMAN	Ras-related protein Rab-14 OS=Homo sapiens GN=RAB14 PE=1 SV=4	HUMAN	2	sp	P61106	RAB14_HUMAN
712	0.91	1.19	12.37	1.271	0.687	tr|A0A087WYV8|A0A087WYV8_HUMAN	Fibrillin-2 OS=Homo sapiens GN=FBN2 PE=1 SV=1	HUMAN	2	tr	A0A087WYV8	A0A087WYV8_HUMAN
714	0.9	0.9	30.34	5.805	5.805	tr|A0A087WVM3|A0A087WVM3_HUMAN	Protein CYR61 OS=Homo sapiens GN=CYR61 PE=1 SV=1	HUMAN	2	tr	A0A087WVM3	A0A087WVM3_HUMAN
715	0.88	0.88	29.47	12.91	8.278	sp|O76061|STC2_HUMAN	Stanniocalcin-2 OS=Homo sapiens GN=STC2 PE=1 SV=1	HUMAN	2	sp	O76061	STC2_HUMAN
720	0.85	6.78	35.38	35.38	35.38	sp|Q93077|H2A1C_HUMAN	Histone H2A type 1-C OS=Homo sapiens GN=HIST1H2AC PE=1 SV=3	HUMAN	4	sp	Q93077	H2A1C_HUMAN
722	0.82	0.83	30.33	5.687	5.687	sp|P26373|RL13_HUMAN	60S ribosomal protein L13 OS=Homo sapiens GN=RPL13 PE=1 SV=4	HUMAN	2	sp	P26373	RL13_HUMAN
727	0.8	1.78	25.93	11.38	4.233	sp|P51991|ROA3_HUMAN	Heterogeneous nuclear ribonucleoprotein A3 OS=Homo sapiens GN=HNRNPA3 PE=1 SV=2	HUMAN	2	sp	P51991	ROA3_HUMAN
733	0.75	0.75	11.82	3.941	3.448	sp|P05154|IPSP_HUMAN	Plasma serine protease inhibitor OS=Homo sapiens GN=SERPINA5 PE=1 SV=3	HUMAN	3	sp	P05154	IPSP_HUMAN
753	0.65	0.65	30.43	15.81	8.3	tr|J3KTL2|J3KTL2_HUMAN	Serine/arginine-rich-splicing factor 1 OS=Homo sapiens GN=SRSF1 PE=1 SV=1	HUMAN	2	tr	J3KTL2	J3KTL2_HUMAN
754	0.64	1.1	31.77	14.08	10.83	sp|Q99436|PSB7_HUMAN	Proteasome subunit beta type-7 OS=Homo sapiens GN=PSMB7 PE=1 SV=1	HUMAN	5	sp	Q99436	PSB7_HUMAN
764	0.6	1.47	6.924	2.023	0.6745	sp|P12259|FA5_HUMAN	Coagulation factor V OS=Homo sapiens GN=F5 PE=1 SV=4	HUMAN	2	sp	P12259	FA5_HUMAN
768	0.57	16.88	48.79	35.48	27.42	tr|H7BYY1|H7BYY1_HUMAN	Tropomyosin 1 (Alpha), isoform CRA_m OS=Homo sapiens GN=TPM1 PE=1 SV=1	HUMAN	9	tr	H7BYY1	H7BYY1_HUMAN
773	0.56	0.56	31.9	8.589	4.908	tr|H0YG03|H0YG03_HUMAN	Microfibrillar-associated protein 5 (Fragment) OS=Homo sapiens GN=MFAP5 PE=1 SV=1	HUMAN	2	tr	H0YG03	H0YG03_HUMAN
784	0.5	2.59	28.39	6.992	6.992	tr|G8JLB6|G8JLB6_HUMAN	Heterogeneous nuclear ribonucleoprotein H OS=Homo sapiens GN=HNRNPH1 PE=1 SV=1	HUMAN	2	tr	G8JLB6	G8JLB6_HUMAN
813	0.36	3.28	26.61	8.136	5.254	sp|P13647|K2C5_HUMAN	Keratin, type II cytoskeletal 5 OS=Homo sapiens GN=KRT5 PE=1 SV=3	HUMAN	3	sp	P13647	K2C5_HUMAN
817	0.35	0.87	5.411	1.069	0.7348	sp|Q8IWB6|TEX14_HUMAN	Inactive serine/threonine-protein kinase TEX14 OS=Homo sapiens GN=TEX14 PE=1 SV=2	HUMAN	2	sp	Q8IWB6	TEX14_HUMAN
827	0.32	0.73	10.63	2.052	2.052	RRRRRsp|Q8N7P1|PLD5_HUMAN	REVERSED Inactive phospholipase D5 OS=Homo sapiens GN=PLD5 PE=2 SV=2	HUMAN	2	RRRRRsp	Q8N7P1	PLD5_HUMAN
888	0.18	4.3	35.38	35.38	21.54	sp|Q8IUE6|H2A2B_HUMAN	Histone H2A type 2-B OS=Homo sapiens GN=HIST2H2AB PE=1 SV=3	HUMAN	2	sp	Q8IUE6	H2A2B_HUMAN
901	0.16	13.13	17.19	14.18	9.536	tr|A0A0B4J269|A0A0B4J269_HUMAN	Tubulin beta-3 chain OS=Homo sapiens GN=TUBB3 PE=4 SV=1	HUMAN	11	tr	A0A0B4J269	A0A0B4J269_HUMAN
902	0.16	3.26	43.78	22.89	10.95	sp|Q92928|RAB1C_HUMAN	Putative Ras-related protein Rab-1C OS=Homo sapiens GN=RAB1C PE=5 SV=2	HUMAN	2	sp	Q92928	RAB1C_HUMAN
903	0.16	1.68	21.35	7.188	3.805	sp|P08779|K1C16_HUMAN	Keratin, type I cytoskeletal 16 OS=Homo sapiens GN=KRT16 PE=1 SV=4	HUMAN	2	sp	P08779	K1C16_HUMAN
947	0.11	6.23	51.59	35.71	27.78	sp|P33778|H2B1B_HUMAN	Histone H2B type 1-B OS=Homo sapiens GN=HIST1H2BB PE=1 SV=2	HUMAN	6	sp	P33778	H2B1B_HUMAN
966	0.1	3.65	21.96	15.51	10.98	sp|Q00888|PSG4_HUMAN	Pregnancy-specific beta-1-glycoprotein 4 OS=Homo sapiens GN=PSG4 PE=2 SV=3	HUMAN	3	sp	Q00888	PSG4_HUMAN

## Sheet: A MSC sample 151107
N	Unused	Total	%Cov	%Cov(50)	%Cov(95)	Accession	Name	Species	Peptides(95%)	Accession			Molecular Function	PANTHER ID
1	332.07	332.07	86.67	78.83	77.58	sp|P02751|FINC_HUMAN	Fibronectin OS=Homo sapiens GN=FN1 PE=1 SV=4	HUMAN	618	sp	P02751	FINC_HUMAN
2	264.75	264.75	69.02	60.27	57.69	sp|Q99715|COCA1_HUMAN	Collagen alpha-1(XII) chain OS=Homo sapiens GN=COL12A1 PE=1 SV=2	HUMAN	174	sp	Q99715	COCA1_HUMAN
3	254.97	255.1	97.73	93.48	91.22	sp|P08123|CO1A2_HUMAN	Collagen alpha-2(I) chain OS=Homo sapiens GN=COL1A2 PE=1 SV=7	HUMAN	689	sp	P08123	CO1A2_HUMAN
4	227.19	227.19	63.96	53.98	47.59	sp|P12111|CO6A3_HUMAN	Collagen alpha-3(VI) chain OS=Homo sapiens GN=COL6A3 PE=1 SV=5	HUMAN	152	sp	P12111	CO6A3_HUMAN
5	192.01	192.01	53.2	41.82	40.08	tr|E7EPZ9|E7EPZ9_HUMAN	Tenascin-X OS=Homo sapiens GN=TNXB PE=1 SV=1	HUMAN	117	tr	E7EPZ9	E7EPZ9_HUMAN
6	179.11	181.67	87.91	83.74	81.28	sp|P02452|CO1A1_HUMAN	Collagen alpha-1(I) chain OS=Homo sapiens GN=COL1A1 PE=1 SV=5	HUMAN	546	sp	P02452	CO1A1_HUMAN
7	144.6	144.6	91.63	90.99	89.91	sp|P08670|VIME_HUMAN	Vimentin OS=Homo sapiens GN=VIM PE=1 SV=4	HUMAN	124	sp	P08670	VIME_HUMAN
8	122.77	122.77	47.4	37.52	36.76	tr|Q60FE5|Q60FE5_HUMAN	Filamin A OS=Homo sapiens GN=FLNA PE=1 SV=1	HUMAN	69	tr	Q60FE5	Q60FE5_HUMAN
9	100.46	100.46	74.52	68.78	63.4	sp|Q15063|POSTN_HUMAN	Periostin OS=Homo sapiens GN=POSTN PE=1 SV=2	HUMAN	102	sp	Q15063	POSTN_HUMAN
10	88.7	88.7	69.13	63.1	58.13	sp|P02545|LMNA_HUMAN	Prelamin-A/C OS=Homo sapiens GN=LMNA PE=1 SV=1	HUMAN	52	sp	P02545	LMNA_HUMAN
11	83.63	83.63	63.06	47.37	44.54	tr|A0A087X0S5|A0A087X0S5_HUMAN	Collagen alpha-1(VI) chain OS=Homo sapiens GN=COL6A1 PE=1 SV=1	HUMAN	79	tr	A0A087X0S5	A0A087X0S5_HUMAN
12	83.54	84.67	72.04	69.4	67.35	sp|Q15582|BGH3_HUMAN	Transforming growth factor-beta-induced protein ig-h3 OS=Homo sapiens GN=TGFBI PE=1 SV=1	HUMAN	120	sp	Q15582	BGH3_HUMAN
13	78.85	78.85	74.01	47.68	44.34	sp|P02461|CO3A1_HUMAN	Collagen alpha-1(III) chain OS=Homo sapiens GN=COL3A1 PE=1 SV=4	HUMAN	176	sp	P02461	CO3A1_HUMAN
14	76.72	76.72	50.57	39.21	28.92	sp|P01024|CO3_HUMAN	Complement C3 OS=Homo sapiens GN=C3 PE=1 SV=2	HUMAN	49	sp	P01024	CO3_HUMAN
15	75.75	75.75	24.62	14.99	14.35	sp|P98160|PGBM_HUMAN	Basement membrane-specific heparan sulfate proteoglycan core protein OS=Homo sapiens GN=HSPG2 PE=1 SV=4	HUMAN	46	sp	P98160	PGBM_HUMAN
16	75.66	75.66	63.15	58.72	53.82	sp|P11021|GRP78_HUMAN	78 kDa glucose-regulated protein OS=Homo sapiens GN=HSPA5 PE=1 SV=2	HUMAN	49	sp	P11021	GRP78_HUMAN
17	74.95	74.95	69.81	58.07	53.24	sp|O43707|ACTN4_HUMAN	Alpha-actinin-4 OS=Homo sapiens GN=ACTN4 PE=1 SV=2	HUMAN	48	sp	O43707	ACTN4_HUMAN
18	74.85	74.85	34.96	31.37	29.32	sp|P07996|TSP1_HUMAN	Thrombospondin-1 OS=Homo sapiens GN=THBS1 PE=1 SV=2	HUMAN	51	sp	P07996	TSP1_HUMAN
19	74.69	74.69	82.66	72.98	72.98	sp|P67936|TPM4_HUMAN	Tropomyosin alpha-4 chain OS=Homo sapiens GN=TPM4 PE=1 SV=3	HUMAN	46	sp	P67936	TPM4_HUMAN
20	73.23	73.25	43.5	29.07	26.17	sp|Q16363|LAMA4_HUMAN	Laminin subunit alpha-4 OS=Homo sapiens GN=LAMA4 PE=1 SV=4	HUMAN	41	sp	Q16363	LAMA4_HUMAN
21	71.82	71.82	93.78	83.33	83.33	sp|P05121|PAI1_HUMAN	Plasminogen activator inhibitor 1 OS=Homo sapiens GN=SERPINE1 PE=1 SV=1	HUMAN	99	sp	P05121	PAI1_HUMAN
22	67.08	67.08	87.99	71.06	62.99	sp|P07237|PDIA1_HUMAN	Protein disulfide-isomerase OS=Homo sapiens GN=P4HB PE=1 SV=3	HUMAN	40	sp	P07237	PDIA1_HUMAN
23	65.82	65.82	70.89	62.18	59.8	sp|P30101|PDIA3_HUMAN	Protein disulfide-isomerase A3 OS=Homo sapiens GN=PDIA3 PE=1 SV=4	HUMAN	40	sp	P30101	PDIA3_HUMAN
24	65.39	65.39	68.28	54.25	48.7	sp|P26038|MOES_HUMAN	Moesin OS=Homo sapiens GN=MSN PE=1 SV=3	HUMAN	37	sp	P26038	MOES_HUMAN
25	64.54	64.54	41.02	29.27	26.54	sp|P11047|LAMC1_HUMAN	Laminin subunit gamma-1 OS=Homo sapiens GN=LAMC1 PE=1 SV=3	HUMAN	40	sp	P11047	LAMC1_HUMAN
26	62.34	62.34	39.17	23.37	20.39	tr|G3XAI2|G3XAI2_HUMAN	Laminin subunit beta-1 OS=Homo sapiens GN=LAMB1 PE=1 SV=1	HUMAN	34	tr	G3XAI2	G3XAI2_HUMAN
27	62.14	62.14	75.61	65.3	61.82	sp|P08253|MMP2_HUMAN	72 kDa type IV collagenase OS=Homo sapiens GN=MMP2 PE=1 SV=2	HUMAN	58	sp	P08253	MMP2_HUMAN
28	61.97	61.97	86.12	78.47	72.97	sp|P50454|SERPH_HUMAN	Serpin H1 OS=Homo sapiens GN=SERPINH1 PE=1 SV=2	HUMAN	48	sp	P50454	SERPH_HUMAN
29	59.08	59.08	45.3	27.59	24.41	sp|Q92626|PXDN_HUMAN	Peroxidasin homolog OS=Homo sapiens GN=PXDN PE=1 SV=2	HUMAN	34	sp	Q92626	PXDN_HUMAN
30	57.56	57.56	63.73	63.2	60.8	sp|P63261|ACTG_HUMAN	Actin, cytoplasmic 2 OS=Homo sapiens GN=ACTG1 PE=1 SV=1	HUMAN	55	sp	P63261	ACTG_HUMAN
31	56.84	56.84	41.1	21.64	19.9	sp|Q13813|SPTN1_HUMAN	Spectrin alpha chain, non-erythrocytic 1 OS=Homo sapiens GN=SPTAN1 PE=1 SV=3	HUMAN	32	sp	Q13813	SPTN1_HUMAN
32	56.78	72.43	33.87	21.8	19.16	sp|Q14315|FLNC_HUMAN	Filamin-C OS=Homo sapiens GN=FLNC PE=1 SV=3	HUMAN	39	sp	Q14315	FLNC_HUMAN
33	56.7	56.7	61.64	54.99	53.2	sp|P06396|GELS_HUMAN	Gelsolin OS=Homo sapiens GN=GSN PE=1 SV=1	HUMAN	38	sp	P06396	GELS_HUMAN
34	56.65	58.46	55.9	47.2	44.25	sp|P04264|K2C1_HUMAN	Keratin, type II cytoskeletal 1 OS=Homo sapiens GN=KRT1 PE=1 SV=6	HUMAN	34	sp	P04264	K2C1_HUMAN
35	54.42	54.42	54.89	48.33	43.64	sp|O00391|QSOX1_HUMAN	Sulfhydryl oxidase 1 OS=Homo sapiens GN=QSOX1 PE=1 SV=3	HUMAN	34	sp	O00391	QSOX1_HUMAN
36	52.66	52.66	60.83	51.98	50.09	sp|P14618|KPYM_HUMAN	Pyruvate kinase PKM OS=Homo sapiens GN=PKM PE=1 SV=4	HUMAN	36	sp	P14618	KPYM_HUMAN
37	52.47	52.47	52.43	46.58	36.61	sp|P14625|ENPL_HUMAN	Endoplasmin OS=Homo sapiens GN=HSP90B1 PE=1 SV=1	HUMAN	28	sp	P14625	ENPL_HUMAN
38	51.95	51.95	75.63	70.35	65.58	sp|P07093|GDN_HUMAN	Glia-derived nexin OS=Homo sapiens GN=SERPINE2 PE=1 SV=1	HUMAN	57	sp	P07093	GDN_HUMAN
39	51.1	51.1	75.3	65.96	61.14	sp|P00338|LDHA_HUMAN	L-lactate dehydrogenase A chain OS=Homo sapiens GN=LDHA PE=1 SV=2	HUMAN	32	sp	P00338	LDHA_HUMAN
40	50.78	50.78	73.32	54.88	54.23	sp|Q02818|NUCB1_HUMAN	Nucleobindin-1 OS=Homo sapiens GN=NUCB1 PE=1 SV=4	HUMAN	27	sp	Q02818	NUCB1_HUMAN
41	50.38	50.53	70.05	64.29	62.44	sp|P06733|ENOA_HUMAN	Alpha-enolase OS=Homo sapiens GN=ENO1 PE=1 SV=2	HUMAN	40	sp	P06733	ENOA_HUMAN
42	50.21	50.21	53.39	32.88	28.85	sp|P12110|CO6A2_HUMAN	Collagen alpha-2(VI) chain OS=Homo sapiens GN=COL6A2 PE=1 SV=4	HUMAN	40	sp	P12110	CO6A2_HUMAN
43	47.99	52.57	67.03	51.55	45.36	sp|P11142|HSP7C_HUMAN	Heat shock cognate 71 kDa protein OS=Homo sapiens GN=HSPA8 PE=1 SV=1	HUMAN	34	sp	P11142	HSP7C_HUMAN
44	47.42	47.42	47.37	33.89	31.37	sp|Q76M96|CCD80_HUMAN	Coiled-coil domain-containing protein 80 OS=Homo sapiens GN=CCDC80 PE=1 SV=1	HUMAN	27	sp	Q76M96	CCD80_HUMAN
45	46.36	46.36	68.44	61.95	55.46	sp|P07355|ANXA2_HUMAN	Annexin A2 OS=Homo sapiens GN=ANXA2 PE=1 SV=2	HUMAN	29	sp	P07355	ANXA2_HUMAN
46	45.07	45.74	32.93	21.3	18.19	sp|P55268|LAMB2_HUMAN	Laminin subunit beta-2 OS=Homo sapiens GN=LAMB2 PE=1 SV=2	HUMAN	24	sp	P55268	LAMB2_HUMAN
47	44.53	44.53	54.57	44.54	41.43	sp|P10909|CLUS_HUMAN	Clusterin OS=Homo sapiens GN=CLU PE=1 SV=1	HUMAN	39	sp	P10909	CLUS_HUMAN
48	44.18	44.18	55.71	39.58	35.48	sp|P55072|TERA_HUMAN	Transitional endoplasmic reticulum ATPase OS=Homo sapiens GN=VCP PE=1 SV=4	HUMAN	26	sp	P55072	TERA_HUMAN
49	43.93	43.94	47.82	23.12	19.53	sp|P20908|CO5A1_HUMAN	Collagen alpha-1(V) chain OS=Homo sapiens GN=COL5A1 PE=1 SV=3	HUMAN	34	sp	P20908	CO5A1_HUMAN
50	43.5	43.77	81.34	73.44	67.94	sp|P36955|PEDF_HUMAN	Pigment epithelium-derived factor OS=Homo sapiens GN=SERPINF1 PE=1 SV=4	HUMAN	40	sp	P36955	PEDF_HUMAN
51	41.71	41.72	44.4	37.84	32.1	sp|P07900|HS90A_HUMAN	Heat shock protein HSP 90-alpha OS=Homo sapiens GN=HSP90AA1 PE=1 SV=5	HUMAN	22	sp	P07900	HS90A_HUMAN
52	41.04	41.13	71.03	63.79	60.72	sp|P07585|PGS2_HUMAN	Decorin OS=Homo sapiens GN=DCN PE=1 SV=1	HUMAN	42	sp	P07585	PGS2_HUMAN
53	40.98	40.98	56.4	44.7	41.4	sp|Q02809|PLOD1_HUMAN	Procollagen-lysine,2-oxoglutarate 5-dioxygenase 1 OS=Homo sapiens GN=PLOD1 PE=1 SV=2	HUMAN	22	sp	Q02809	PLOD1_HUMAN
54	40.2	64.51	89.22	81.03	72.41	tr|Q5HYB6|Q5HYB6_HUMAN	Epididymis luminal protein 189 OS=Homo sapiens GN=DKFZp686J1372 PE=1 SV=1	HUMAN	37	tr	Q5HYB6	Q5HYB6_HUMAN
55	40.09	40.34	31.98	11.04	7.045	sp|Q15149|PLEC_HUMAN	Plectin OS=Homo sapiens GN=PLEC PE=1 SV=3	HUMAN	25	sp	Q15149	PLEC_HUMAN
56	38.8	40.88	33.38	13.96	11.29	sp|Q01082|SPTB2_HUMAN	Spectrin beta chain, non-erythrocytic 1 OS=Homo sapiens GN=SPTBN1 PE=1 SV=2	HUMAN	23	sp	Q01082	SPTB2_HUMAN
57	38.56	38.56	57.75	55.4	55.4	tr|Q5JP53|Q5JP53_HUMAN	Tubulin beta chain OS=Homo sapiens GN=TUBB PE=1 SV=1	HUMAN	28	tr	Q5JP53	Q5JP53_HUMAN
58	38.53	47.28	55.54	48.05	43.53	sp|P08107|HSP71_HUMAN	Heat shock 70 kDa protein 1A/1B OS=Homo sapiens GN=HSPA1A PE=1 SV=5	HUMAN	28	sp	P08107	HSP71_HUMAN
59	37.74	37.74	30.48	17.73	13.93	sp|P35555|FBN1_HUMAN	Fibrillin-1 OS=Homo sapiens GN=FBN1 PE=1 SV=3	HUMAN	44	sp	P35555	FBN1_HUMAN
60	37.45	69.34	70.4	52.24	44.51	sp|P12814|ACTN1_HUMAN	Alpha-actinin-1 OS=Homo sapiens GN=ACTN1 PE=1 SV=2	HUMAN	41	sp	P12814	ACTN1_HUMAN
61	36.74	36.74	68.34	56.21	54.73	sp|P51884|LUM_HUMAN	Lumican OS=Homo sapiens GN=LUM PE=1 SV=2	HUMAN	30	sp	P51884	LUM_HUMAN
62	36.24	36.24	46.66	36.05	32.27	sp|P09871|C1S_HUMAN	Complement C1s subcomponent OS=Homo sapiens GN=C1S PE=1 SV=1	HUMAN	33	sp	P09871	C1S_HUMAN
63	36.14	36.18	60.89	60.1	57.22	sp|P26022|PTX3_HUMAN	Pentraxin-related protein PTX3 OS=Homo sapiens GN=PTX3 PE=1 SV=3	HUMAN	62	sp	P26022	PTX3_HUMAN
64	35.37	37.18	58.6	41.4	37.98	sp|P13667|PDIA4_HUMAN	Protein disulfide-isomerase A4 OS=Homo sapiens GN=PDIA4 PE=1 SV=2	HUMAN	22	sp	P13667	PDIA4_HUMAN
65	35.08	35.08	73.88	59.18	57.14	sp|P63104|1433Z_HUMAN	14-3-3 protein zeta/delta OS=Homo sapiens GN=YWHAZ PE=1 SV=1	HUMAN	20	sp	P63104	1433Z_HUMAN
66	34.7	34.79	54.97	41.44	33.56	sp|P13645|K1C10_HUMAN	Keratin, type I cytoskeletal 10 OS=Homo sapiens GN=KRT10 PE=1 SV=6	HUMAN	19	sp	P13645	K1C10_HUMAN
67	34.53	34.53	44.19	30.47	24.54	sp|P14543|NID1_HUMAN	Nidogen-1 OS=Homo sapiens GN=NID1 PE=1 SV=3	HUMAN	17	sp	P14543	NID1_HUMAN
68	34.17	38.66	30.38	23.04	23.04	sp|P35442|TSP2_HUMAN	Thrombospondin-2 OS=Homo sapiens GN=THBS2 PE=1 SV=2	HUMAN	28	sp	P35442	TSP2_HUMAN
69	33.81	33.81	55.86	43.82	37.88	sp|P29401|TKT_HUMAN	Transketolase OS=Homo sapiens GN=TKT PE=1 SV=3	HUMAN	19	sp	P29401	TKT_HUMAN
70	33.65	33.95	30.66	24.21	21.27	tr|E7EUF1|E7EUF1_HUMAN	Ectonucleotide pyrophosphatase/phosphodiesterase family member 2 OS=Homo sapiens GN=ENPP2 PE=1 SV=1	HUMAN	27	tr	E7EUF1	E7EUF1_HUMAN
71	33.26	33.26	78.24	72.22	57.87	sp|P23284|PPIB_HUMAN	Peptidyl-prolyl cis-trans isomerase B OS=Homo sapiens GN=PPIB PE=1 SV=2	HUMAN	25	sp	P23284	PPIB_HUMAN
72	33.12	33.12	74.92	58.1	53.65	sp|O43852|CALU_HUMAN	Calumenin OS=Homo sapiens GN=CALU PE=1 SV=2	HUMAN	19	sp	O43852	CALU_HUMAN
73	32.89	32.89	60.45	51.59	48.86	sp|Q15084|PDIA6_HUMAN	Protein disulfide-isomerase A6 OS=Homo sapiens GN=PDIA6 PE=1 SV=1	HUMAN	16	sp	Q15084	PDIA6_HUMAN
74	31.79	35.44	60.24	25.55	22.28	sp|P05997|CO5A2_HUMAN	Collagen alpha-2(V) chain OS=Homo sapiens GN=COL5A2 PE=1 SV=3	HUMAN	28	sp	P05997	CO5A2_HUMAN
75	30.63	30.63	61.62	58.64	44.56	sp|P03956|MMP1_HUMAN	Interstitial collagenase OS=Homo sapiens GN=MMP1 PE=1 SV=3	HUMAN	17	sp	P03956	MMP1_HUMAN
76	30.58	30.58	81.16	77.78	69.08	sp|P01033|TIMP1_HUMAN	Metalloproteinase inhibitor 1 OS=Homo sapiens GN=TIMP1 PE=1 SV=1	HUMAN	38	sp	P01033	TIMP1_HUMAN
77	30.13	30.13	44.64	27.74	21.91	sp|P13639|EF2_HUMAN	Elongation factor 2 OS=Homo sapiens GN=EEF2 PE=1 SV=4	HUMAN	15	sp	P13639	EF2_HUMAN
78	29.95	29.95	59.54	48.27	47.11	sp|P04083|ANXA1_HUMAN	Annexin A1 OS=Homo sapiens GN=ANXA1 PE=1 SV=2	HUMAN	16	sp	P04083	ANXA1_HUMAN
79	29.82	31.22	42.01	32.79	30.62	sp|O60568|PLOD3_HUMAN	Procollagen-lysine,2-oxoglutarate 5-dioxygenase 3 OS=Homo sapiens GN=PLOD3 PE=1 SV=1	HUMAN	17	sp	O60568	PLOD3_HUMAN
80	29.61	29.72	37.09	20.15	13.98	sp|P35579|MYH9_HUMAN	Myosin-9 OS=Homo sapiens GN=MYH9 PE=1 SV=4	HUMAN	19	sp	P35579	MYH9_HUMAN
81	29.42	31.35	29.89	14.16	11.54	tr|E7EN95|E7EN95_HUMAN	Filamin-B OS=Homo sapiens GN=FLNB PE=1 SV=1	HUMAN	18	tr	E7EN95	E7EN95_HUMAN
82	29.4	29.56	39.15	21.06	20.28	sp|Q9Y4K0|LOXL2_HUMAN	Lysyl oxidase homolog 2 OS=Homo sapiens GN=LOXL2 PE=1 SV=1	HUMAN	20	sp	Q9Y4K0	LOXL2_HUMAN
83	29.31	31.39	28.29	21.45	20.65	sp|Q14112|NID2_HUMAN	Nidogen-2 OS=Homo sapiens GN=NID2 PE=1 SV=3	HUMAN	17	sp	Q14112	NID2_HUMAN
84	29.21	29.21	41.53	23.63	18.43	sp|P18206|VINC_HUMAN	Vinculin OS=Homo sapiens GN=VCL PE=1 SV=4	HUMAN	17	sp	P18206	VINC_HUMAN
85	29.09	29.09	40	31	29.8	sp|P05155|IC1_HUMAN	Plasma protease C1 inhibitor OS=Homo sapiens GN=SERPING1 PE=1 SV=2	HUMAN	17	sp	P05155	IC1_HUMAN
86	29	29	24.93	15.15	12.89	tr|G3V511|G3V511_HUMAN	Latent-transforming growth factor beta-binding protein 2 OS=Homo sapiens GN=LTBP2 PE=1 SV=1	HUMAN	17	tr	G3V511	G3V511_HUMAN
87	28.71	28.71	70.69	67.98	61.03	sp|Q15293|RCN1_HUMAN	Reticulocalbin-1 OS=Homo sapiens GN=RCN1 PE=1 SV=1	HUMAN	19	sp	Q15293	RCN1_HUMAN
88	28.48	28.48	46.5	29.23	25.64	sp|Q08380|LG3BP_HUMAN	Galectin-3-binding protein OS=Homo sapiens GN=LGALS3BP PE=1 SV=1	HUMAN	17	sp	Q08380	LG3BP_HUMAN
89	28.34	28.34	62.83	54.44	50.36	sp|P28300|LYOX_HUMAN	Protein-lysine 6-oxidase OS=Homo sapiens GN=LOX PE=1 SV=2	HUMAN	17	sp	P28300	LYOX_HUMAN
90	28.29	28.35	62.89	49.58	45.61	sp|P22626|ROA2_HUMAN	Heterogeneous nuclear ribonucleoproteins A2/B1 OS=Homo sapiens GN=HNRNPA2B1 PE=1 SV=2	HUMAN	19	sp	P22626	ROA2_HUMAN
91	28.18	28.18	65.41	58.6	45.94	sp|P06576|ATPB_HUMAN	ATP synthase subunit beta, mitochondrial OS=Homo sapiens GN=ATP5B PE=1 SV=3	HUMAN	17	sp	P06576	ATPB_HUMAN
92	28.15	28.15	64.67	45.38	43.75	tr|J3KPS3|J3KPS3_HUMAN	Fructose-bisphosphate aldolase OS=Homo sapiens GN=ALDOA PE=1 SV=1	HUMAN	19	tr	J3KPS3	J3KPS3_HUMAN
93	27.94	27.94	48.64	45	35.91	sp|P16035|TIMP2_HUMAN	Metalloproteinase inhibitor 2 OS=Homo sapiens GN=TIMP2 PE=1 SV=2	HUMAN	20	sp	P16035	TIMP2_HUMAN
94	27.92	27.94	21.5	16.23	15.46	sp|Q8IUX7|AEBP1_HUMAN	Adipocyte enhancer-binding protein 1 OS=Homo sapiens GN=AEBP1 PE=1 SV=1	HUMAN	18	sp	Q8IUX7	AEBP1_HUMAN
95	27.28	27.28	17.9	10.24	9.904	tr|D3YTG3|D3YTG3_HUMAN	Target of Nesh-SH3 OS=Homo sapiens GN=ABI3BP PE=1 SV=1	HUMAN	16	tr	D3YTG3	D3YTG3_HUMAN
96	27.24	27.78	33.25	33.25	31.03	sp|Q9NRN5|OLFL3_HUMAN	Olfactomedin-like protein 3 OS=Homo sapiens GN=OLFML3 PE=2 SV=1	HUMAN	20	sp	Q9NRN5	OLFL3_HUMAN
97	26.98	27	23.86	8.104	6.566	sp|P24043|LAMA2_HUMAN	Laminin subunit alpha-2 OS=Homo sapiens GN=LAMA2 PE=1 SV=4	HUMAN	15	sp	P24043	LAMA2_HUMAN
98	26.95	26.95	51.13	33.33	33.33	sp|P10809|CH60_HUMAN	60 kDa heat shock protein, mitochondrial OS=Homo sapiens GN=HSPD1 PE=1 SV=2	HUMAN	19	sp	P10809	CH60_HUMAN
99	26.72	26.72	40.06	27.82	26.01	tr|B4DPQ0|B4DPQ0_HUMAN	Complement C1r subcomponent OS=Homo sapiens GN=C1R PE=1 SV=1	HUMAN	24	tr	B4DPQ0	B4DPQ0_HUMAN
100	26.52	27.24	45.47	38.34	36.99	tr|F5H5D3|F5H5D3_HUMAN	Tubulin alpha-1C chain OS=Homo sapiens GN=TUBA1C PE=1 SV=1	HUMAN	18	tr	F5H5D3	F5H5D3_HUMAN
101	26.38	27.43	59.87	48.96	43.82	sp|P35527|K1C9_HUMAN	Keratin, type I cytoskeletal 9 OS=Homo sapiens GN=KRT9 PE=1 SV=3	HUMAN	20	sp	P35527	K1C9_HUMAN
102	26.27	26.27	67.34	63.82	52.26	sp|Q06830|PRDX1_HUMAN	Peroxiredoxin-1 OS=Homo sapiens GN=PRDX1 PE=1 SV=1	HUMAN	22	sp	Q06830	PRDX1_HUMAN
103	25.75	25.75	53.76	43.66	40.14	sp|P08476|INHBA_HUMAN	Inhibin beta A chain OS=Homo sapiens GN=INHBA PE=1 SV=2	HUMAN	19	sp	P08476	INHBA_HUMAN
104	25.66	25.8	46.4	32.88	30.33	sp|O75326|SEM7A_HUMAN	Semaphorin-7A OS=Homo sapiens GN=SEMA7A PE=1 SV=1	HUMAN	17	sp	O75326	SEM7A_HUMAN
105	25.32	25.32	96.03	76.98	76.19	sp|Q99879|H2B1M_HUMAN	Histone H2B type 1-M OS=Homo sapiens GN=HIST1H2BM PE=1 SV=3	HUMAN	18	sp	Q99879	H2B1M_HUMAN
106	25.17	25.17	50.48	38.41	33.97	tr|D3DQH8|D3DQH8_HUMAN	SPARC OS=Homo sapiens GN=SPARC PE=1 SV=1	HUMAN	31	tr	D3DQH8	D3DQH8_HUMAN
107	24.69	24.69	28.07	16.8	14.9	sp|P53396|ACLY_HUMAN	ATP-citrate synthase OS=Homo sapiens GN=ACLY PE=1 SV=3	HUMAN	13	sp	P53396	ACLY_HUMAN
108	24.39	24.39	52.6	42.21	41.56	sp|P68104|EF1A1_HUMAN	Elongation factor 1-alpha 1 OS=Homo sapiens GN=EEF1A1 PE=1 SV=1	HUMAN	21	sp	P68104	EF1A1_HUMAN
109	23.93	23.93	41.27	24.79	21.69	sp|P19338|NUCL_HUMAN	Nucleolin OS=Homo sapiens GN=NCL PE=1 SV=3	HUMAN	12	sp	P19338	NUCL_HUMAN
110	23.88	23.88	50.78	37.19	37.19	sp|Q15113|PCOC1_HUMAN	Procollagen C-endopeptidase enhancer 1 OS=Homo sapiens GN=PCOLCE PE=1 SV=2	HUMAN	21	sp	Q15113	PCOC1_HUMAN
111	23.82	23.82	74.15	72.2	72.2	sp|P04792|HSPB1_HUMAN	Heat shock protein beta-1 OS=Homo sapiens GN=HSPB1 PE=1 SV=2	HUMAN	15	sp	P04792	HSPB1_HUMAN
112	23.81	23.81	66.01	47.03	46.03	tr|E7ENM0|E7ENM0_HUMAN	Elastin OS=Homo sapiens GN=ELN PE=1 SV=1	HUMAN	12	tr	E7ENM0	E7ENM0_HUMAN
113	23.55	23.55	34.95	23.16	20.53	tr|B1AHL2|B1AHL2_HUMAN	Fibulin-1 OS=Homo sapiens GN=FBLN1 PE=1 SV=1	HUMAN	15	tr	B1AHL2	B1AHL2_HUMAN
114	23.49	23.49	56.91	53.04	47.79	sp|Q9BRK5|CAB45_HUMAN	45 kDa calcium-binding protein OS=Homo sapiens GN=SDF4 PE=1 SV=1	HUMAN	14	sp	Q9BRK5	CAB45_HUMAN
115	23.45	23.45	53.48	39.55	35.51	sp|P50395|GDIB_HUMAN	Rab GDP dissociation inhibitor beta OS=Homo sapiens GN=GDI2 PE=1 SV=2	HUMAN	13	sp	P50395	GDIB_HUMAN
116	23.44	23.44	45.63	35.62	32.08	sp|Q92743|HTRA1_HUMAN	Serine protease HTRA1 OS=Homo sapiens GN=HTRA1 PE=1 SV=1	HUMAN	13	sp	Q92743	HTRA1_HUMAN
117	23.35	23.35	38.08	22.42	18.39	sp|P11216|PYGB_HUMAN	Glycogen phosphorylase, brain form OS=Homo sapiens GN=PYGB PE=1 SV=5	HUMAN	11	sp	P11216	PYGB_HUMAN
118	23.32	23.32	64.57	39.97	38.74	tr|A0A0A0MTS2|A0A0A0MTS2_HUMAN	Glucose-6-phosphate isomerase (Fragment) OS=Homo sapiens GN=GPI PE=1 SV=1	HUMAN	17	tr	A0A0A0MTS2	A0A0A0MTS2_HUMAN
119	23.12	23.12	69.64	54.46	46.88	sp|P30041|PRDX6_HUMAN	Peroxiredoxin-6 OS=Homo sapiens GN=PRDX6 PE=1 SV=3	HUMAN	14	sp	P30041	PRDX6_HUMAN
120	22.99	22.99	53.94	49.21	42.13	sp|P18669|PGAM1_HUMAN	Phosphoglycerate mutase 1 OS=Homo sapiens GN=PGAM1 PE=1 SV=2	HUMAN	16	sp	P18669	PGAM1_HUMAN
121	22.6	22.6	39.26	37.41	35.74	sp|Q16610|ECM1_HUMAN	Extracellular matrix protein 1 OS=Homo sapiens GN=ECM1 PE=1 SV=2	HUMAN	19	sp	Q16610	ECM1_HUMAN
122	22.15	22.25	54.2	41.08	33.39	sp|Q16555|DPYL2_HUMAN	Dihydropyrimidinase-related protein 2 OS=Homo sapiens GN=DPYSL2 PE=1 SV=1	HUMAN	12	sp	Q16555	DPYL2_HUMAN
123	22.1	22.11	24.6	12.96	10.72	sp|P0C0L4|CO4A_HUMAN	Complement C4-A OS=Homo sapiens GN=C4A PE=1 SV=2	HUMAN	17	sp	P0C0L4	CO4A_HUMAN
124	22	22	25.68	15.37	12.75	sp|P98095|FBLN2_HUMAN	Fibulin-2 OS=Homo sapiens GN=FBLN2 PE=1 SV=2	HUMAN	15	sp	P98095	FBLN2_HUMAN
125	21.96	23.5	57.07	42.39	38.59	sp|P21810|PGS1_HUMAN	Biglycan OS=Homo sapiens GN=BGN PE=1 SV=2	HUMAN	14	sp	P21810	PGS1_HUMAN
126	21.95	22.03	37.89	22.6	20.43	sp|P41250|SYG_HUMAN	Glycine--tRNA ligase OS=Homo sapiens GN=GARS PE=1 SV=3	HUMAN	12	sp	P41250	SYG_HUMAN
127	21.89	24.03	49.49	44.44	40.91	sp|P32119|PRDX2_HUMAN	Peroxiredoxin-2 OS=Homo sapiens GN=PRDX2 PE=1 SV=5	HUMAN	14	sp	P32119	PRDX2_HUMAN
128	21.27	21.27	54.75	50.19	44.49	sp|P28074|PSB5_HUMAN	Proteasome subunit beta type-5 OS=Homo sapiens GN=PSMB5 PE=1 SV=3	HUMAN	11	sp	P28074	PSB5_HUMAN
129	21.16	21.25	47.84	26.44	23.56	sp|P07686|HEXB_HUMAN	Beta-hexosaminidase subunit beta OS=Homo sapiens GN=HEXB PE=1 SV=3	HUMAN	11	sp	P07686	HEXB_HUMAN
130	21.08	21.1	27.95	18.39	12.75	sp|P01023|A2MG_HUMAN	Alpha-2-macroglobulin OS=Homo sapiens GN=A2M PE=1 SV=3	HUMAN	42	sp	P01023	A2MG_HUMAN
131	21.03	21.03	22.22	11.2	9.649	tr|A0A087WVQ6|A0A087WVQ6_HUMAN	Clathrin heavy chain OS=Homo sapiens GN=CLTC PE=1 SV=1	HUMAN	12	tr	A0A087WVQ6	A0A087WVQ6_HUMAN
132	20.94	20.94	69.21	46.76	36.57	sp|Q8NBS9|TXND5_HUMAN	Thioredoxin domain-containing protein 5 OS=Homo sapiens GN=TXNDC5 PE=1 SV=2	HUMAN	13	sp	Q8NBS9	TXND5_HUMAN
133	20.76	20.76	59.43	25.96	21.91	sp|Q12805|FBLN3_HUMAN	EGF-containing fibulin-like extracellular matrix protein 1 OS=Homo sapiens GN=EFEMP1 PE=1 SV=2	HUMAN	24	sp	Q12805	FBLN3_HUMAN
134	20.64	20.64	80.24	68.55	65.73	sp|O14818|PSA7_HUMAN	Proteasome subunit alpha type-7 OS=Homo sapiens GN=PSMA7 PE=1 SV=1	HUMAN	13	sp	O14818	PSA7_HUMAN
135	20.31	22.3	51.88	33.87	33.87	sp|P09651|ROA1_HUMAN	Heterogeneous nuclear ribonucleoprotein A1 OS=Homo sapiens GN=HNRNPA1 PE=1 SV=5	HUMAN	14	sp	P09651	ROA1_HUMAN
136	20.2	20.2	57.99	42.31	42.31	sp|P40926|MDHM_HUMAN	Malate dehydrogenase, mitochondrial OS=Homo sapiens GN=MDH2 PE=1 SV=3	HUMAN	12	sp	P40926	MDHM_HUMAN
137	20.14	20.14	31.46	19.39	17.69	sp|Q14697|GANAB_HUMAN	Neutral alpha-glucosidase AB OS=Homo sapiens GN=GANAB PE=1 SV=3	HUMAN	11	sp	Q14697	GANAB_HUMAN
138	19.67	19.67	53.96	41.73	38.13	sp|P00558|PGK1_HUMAN	Phosphoglycerate kinase 1 OS=Homo sapiens GN=PGK1 PE=1 SV=3	HUMAN	10	sp	P00558	PGK1_HUMAN
139	19.56	27.22	66.26	65.45	52.03	sp|P31946|1433B_HUMAN	14-3-3 protein beta/alpha OS=Homo sapiens GN=YWHAB PE=1 SV=3	HUMAN	17	sp	P31946	1433B_HUMAN
140	19.38	19.46	64.61	39.61	37.01	sp|Q12841|FSTL1_HUMAN	Follistatin-related protein 1 OS=Homo sapiens GN=FSTL1 PE=1 SV=1	HUMAN	21	sp	Q12841	FSTL1_HUMAN
141	19.33	19.33	93.53	70.65	51.24	sp|Q01995|TAGL_HUMAN	Transgelin OS=Homo sapiens GN=TAGLN PE=1 SV=4	HUMAN	15	sp	Q01995	TAGL_HUMAN
142	19.15	19.22	58.22	39.69	37.6	sp|P36222|CH3L1_HUMAN	Chitinase-3-like protein 1 OS=Homo sapiens GN=CHI3L1 PE=1 SV=2	HUMAN	12	sp	P36222	CH3L1_HUMAN
143	19.01	19.01	62.45	39.85	37.93	sp|P30040|ERP29_HUMAN	Endoplasmic reticulum resident protein 29 OS=Homo sapiens GN=ERP29 PE=1 SV=4	HUMAN	11	sp	P30040	ERP29_HUMAN
144	18.98	18.98	78.64	59.22	58.25	sp|P62805|H4_HUMAN	Histone H4 OS=Homo sapiens GN=HIST1H4A PE=1 SV=2	HUMAN	19	sp	P62805	H4_HUMAN
145	18.75	18.75	60.11	55.12	53.19	sp|Q15019|SEPT2_HUMAN	Septin-2 OS=Homo sapiens GN=SEPT2 PE=1 SV=1	HUMAN	14	sp	Q15019	SEPT2_HUMAN
146	18.47	18.47	50.15	32.82	32.82	tr|A0A0A6YY95|A0A0A6YY95_HUMAN	C-type lectin domain family 11 member A OS=Homo sapiens GN=CLEC11A PE=1 SV=1	HUMAN	11	tr	A0A0A6YY95	A0A0A6YY95_HUMAN
147	18.45	18.45	77.01	54.93	44.48	sp|P04406|G3P_HUMAN	Glyceraldehyde-3-phosphate dehydrogenase OS=Homo sapiens GN=GAPDH PE=1 SV=3	HUMAN	18	sp	P04406	G3P_HUMAN
148	18.29	18.29	68.1	67.14	67.14	sp|P09211|GSTP1_HUMAN	Glutathione S-transferase P OS=Homo sapiens GN=GSTP1 PE=1 SV=2	HUMAN	12	sp	P09211	GSTP1_HUMAN
149	18.2	18.87	27.19	25.41	20.8	sp|Q6EMK4|VASN_HUMAN	Vasorin OS=Homo sapiens GN=VASN PE=1 SV=1	HUMAN	9	sp	Q6EMK4	VASN_HUMAN
150	18.02	18.09	40.72	15.6	14.78	sp|P02768|ALBU_HUMAN	Serum albumin OS=Homo sapiens GN=ALB PE=1 SV=2	HUMAN	21	sp	P02768	ALBU_HUMAN
151	17.62	17.63	44.96	30.22	25.37	tr|E9PGZ1|E9PGZ1_HUMAN	Caldesmon OS=Homo sapiens GN=CALD1 PE=1 SV=1	HUMAN	10	tr	E9PGZ1	E9PGZ1_HUMAN
152	17.54	17.56	50.57	42.21	42.21	sp|P25786|PSA1_HUMAN	Proteasome subunit alpha type-1 OS=Homo sapiens GN=PSMA1 PE=1 SV=1	HUMAN	10	sp	P25786	PSA1_HUMAN
153	17.52	17.52	32.15	18.69	17.01	tr|K7ELL7|K7ELL7_HUMAN	Glucosidase 2 subunit beta OS=Homo sapiens GN=PRKCSH PE=1 SV=1	HUMAN	13	tr	K7ELL7	K7ELL7_HUMAN
154	17.38	17.43	43.16	25.65	23.2	tr|A0A087WSY9|A0A087WSY9_HUMAN	Thioredoxin reductase 1, cytoplasmic OS=Homo sapiens GN=TXNRD1 PE=1 SV=1	HUMAN	10	tr	A0A087WSY9	A0A087WSY9_HUMAN
155	17.27	18.21	51.5	40.12	32.04	sp|P07195|LDHB_HUMAN	L-lactate dehydrogenase B chain OS=Homo sapiens GN=LDHB PE=1 SV=2	HUMAN	14	sp	P07195	LDHB_HUMAN
156	17.25	17.25	56.29	43.36	37.76	sp|P60174|TPIS_HUMAN	Triosephosphate isomerase OS=Homo sapiens GN=TPI1 PE=1 SV=3	HUMAN	10	sp	P60174	TPIS_HUMAN
157	17.1	17.1	39.07	26.92	24.9	sp|O60701|UGDH_HUMAN	UDP-glucose 6-dehydrogenase OS=Homo sapiens GN=UGDH PE=1 SV=1	HUMAN	10	sp	O60701	UGDH_HUMAN
158	17.08	17.08	39.71	33.49	33.49	sp|P61158|ARP3_HUMAN	Actin-related protein 3 OS=Homo sapiens GN=ACTR3 PE=1 SV=3	HUMAN	13	sp	P61158	ARP3_HUMAN
159	16.89	16.89	47.3	47.3	43.57	sp|P20618|PSB1_HUMAN	Proteasome subunit beta type-1 OS=Homo sapiens GN=PSMB1 PE=1 SV=2	HUMAN	10	sp	P20618	PSB1_HUMAN
160	16.71	16.71	44.23	30.4	23.9	sp|P08254|MMP3_HUMAN	Stromelysin-1 OS=Homo sapiens GN=MMP3 PE=1 SV=2	HUMAN	11	sp	P08254	MMP3_HUMAN
161	16.58	16.73	25.43	9.795	7.662	tr|B4E1Z4|B4E1Z4_HUMAN	Uncharacterized protein OS=Homo sapiens PE=2 SV=1	HUMAN	11	tr	B4E1Z4	B4E1Z4_HUMAN
162	16.53	16.53	53.06	42.86	34.4	tr|F5GZN3|F5GZN3_HUMAN	Lactadherin OS=Homo sapiens GN=MFGE8 PE=1 SV=1	HUMAN	9	tr	F5GZN3	F5GZN3_HUMAN
163	16.4	41.71	53.73	37.98	34.94	sp|P08238|HS90B_HUMAN	Heat shock protein HSP 90-beta OS=Homo sapiens GN=HSP90AB1 PE=1 SV=4	HUMAN	24	sp	P08238	HS90B_HUMAN
164	16.36	24.45	54.15	31.3	24.88	sp|P35908|K22E_HUMAN	Keratin, type II cytoskeletal 2 epidermal OS=Homo sapiens GN=KRT2 PE=1 SV=2	HUMAN	15	sp	P35908	K22E_HUMAN
165	16.22	16.22	83.33	53.42	44.02	sp|P25787|PSA2_HUMAN	Proteasome subunit alpha type-2 OS=Homo sapiens GN=PSMA2 PE=1 SV=2	HUMAN	10	sp	P25787	PSA2_HUMAN
166	16.18	16.18	36.67	26.67	23.49	sp|P13797|PLST_HUMAN	Plastin-3 OS=Homo sapiens GN=PLS3 PE=1 SV=4	HUMAN	11	sp	P13797	PLST_HUMAN
167	16.13	16.2	30.02	25.12	17.94	sp|Q7Z5L7|PODN_HUMAN	Podocan OS=Homo sapiens GN=PODN PE=1 SV=2	HUMAN	8	sp	Q7Z5L7	PODN_HUMAN
168	16.02	16.02	45.63	29.85	29.61	sp|P07339|CATD_HUMAN	Cathepsin D OS=Homo sapiens GN=CTSD PE=1 SV=1	HUMAN	11	sp	P07339	CATD_HUMAN
169	15.82	15.82	39.19	33.24	22.16	sp|Q9Y617|SERC_HUMAN	Phosphoserine aminotransferase OS=Homo sapiens GN=PSAT1 PE=1 SV=2	HUMAN	8	sp	Q9Y617	SERC_HUMAN
170	15.7	15.7	57.49	45.41	40.58	tr|D6RE83|D6RE83_HUMAN	Ubiquitin carboxyl-terminal hydrolase OS=Homo sapiens GN=UCHL1 PE=1 SV=1	HUMAN	11	tr	D6RE83	D6RE83_HUMAN
171	15.7	15.7	29.17	29.17	26.67	sp|P08294|SODE_HUMAN	Extracellular superoxide dismutase [Cu-Zn] OS=Homo sapiens GN=SOD3 PE=1 SV=2	HUMAN	9	sp	P08294	SODE_HUMAN
172	15.67	15.67	73.53	51.47	42.16	tr|E9PK25|E9PK25_HUMAN	Cofilin-1 OS=Homo sapiens GN=CFL1 PE=1 SV=1	HUMAN	9	tr	E9PK25	E9PK25_HUMAN
173	15.55	15.55	28.85	18.04	12.33	sp|O94985|CSTN1_HUMAN	Calsyntenin-1 OS=Homo sapiens GN=CLSTN1 PE=1 SV=1	HUMAN	9	sp	O94985	CSTN1_HUMAN
174	15.49	15.49	42.48	29.79	29.79	sp|P07858|CATB_HUMAN	Cathepsin B OS=Homo sapiens GN=CTSB PE=1 SV=3	HUMAN	14	sp	P07858	CATB_HUMAN
175	15.27	15.27	61.51	37.3	32.94	tr|G3V5Z7|G3V5Z7_HUMAN	Proteasome subunit alpha type OS=Homo sapiens GN=PSMA6 PE=1 SV=1	HUMAN	10	tr	G3V5Z7	G3V5Z7_HUMAN
176	15.25	15.25	66.67	44.7	42.8	sp|P28070|PSB4_HUMAN	Proteasome subunit beta type-4 OS=Homo sapiens GN=PSMB4 PE=1 SV=4	HUMAN	12	sp	P28070	PSB4_HUMAN
177	15.22	15.22	72.86	64.29	64.29	sp|P07737|PROF1_HUMAN	Profilin-1 OS=Homo sapiens GN=PFN1 PE=1 SV=2	HUMAN	11	sp	P07737	PROF1_HUMAN
178	15.11	15.11	34.4	25.53	25.53	sp|Q16270|IBP7_HUMAN	Insulin-like growth factor-binding protein 7 OS=Homo sapiens GN=IGFBP7 PE=1 SV=1	HUMAN	9	sp	Q16270	IBP7_HUMAN
179	15.09	15.09	35.7	26.54	23.34	sp|P26641|EF1G_HUMAN	Elongation factor 1-gamma OS=Homo sapiens GN=EEF1G PE=1 SV=3	HUMAN	9	sp	P26641	EF1G_HUMAN
180	15.04	15.05	58.75	52.19	31.56	sp|P08758|ANXA5_HUMAN	Annexin A5 OS=Homo sapiens GN=ANXA5 PE=1 SV=2	HUMAN	9	sp	P08758	ANXA5_HUMAN
181	14.94	14.94	67.49	54.32	48.56	sp|P23396|RS3_HUMAN	40S ribosomal protein S3 OS=Homo sapiens GN=RPS3 PE=1 SV=2	HUMAN	8	sp	P23396	RS3_HUMAN
182	14.91	14.91	43.48	30.02	24.43	sp|P52209|6PGD_HUMAN	6-phosphogluconate dehydrogenase, decarboxylating OS=Homo sapiens GN=PGD PE=1 SV=3	HUMAN	8	sp	P52209	6PGD_HUMAN
183	14.89	14.89	60.29	51.96	51.96	sp|P52565|GDIR1_HUMAN	Rho GDP-dissociation inhibitor 1 OS=Homo sapiens GN=ARHGDIA PE=1 SV=3	HUMAN	12	sp	P52565	GDIR1_HUMAN
184	14.63	14.63	20.89	16.71	15.46	sp|Q93063|EXT2_HUMAN	Exostosin-2 OS=Homo sapiens GN=EXT2 PE=1 SV=1	HUMAN	8	sp	Q93063	EXT2_HUMAN
185	14.53	14.53	51.76	45.49	29.8	sp|P25788|PSA3_HUMAN	Proteasome subunit alpha type-3 OS=Homo sapiens GN=PSMA3 PE=1 SV=2	HUMAN	7	sp	P25788	PSA3_HUMAN
186	14.51	14.51	55.14	34.95	27.29	sp|P78371|TCPB_HUMAN	T-complex protein 1 subunit beta OS=Homo sapiens GN=CCT2 PE=1 SV=4	HUMAN	11	sp	P78371	TCPB_HUMAN
187	14.46	14.46	62.96	62.96	54.07	sp|P09382|LEG1_HUMAN	Galectin-1 OS=Homo sapiens GN=LGALS1 PE=1 SV=2	HUMAN	18	sp	P09382	LEG1_HUMAN
188	14.36	15.37	31.31	18.76	17.04	sp|P49747|COMP_HUMAN	Cartilage oligomeric matrix protein OS=Homo sapiens GN=COMP PE=1 SV=2	HUMAN	10	sp	P49747	COMP_HUMAN
189	14.33	14.33	41.46	32.41	32.41	sp|P15291|B4GT1_HUMAN	Beta-1,4-galactosyltransferase 1 OS=Homo sapiens GN=B4GALT1 PE=1 SV=5	HUMAN	9	sp	P15291	B4GT1_HUMAN
190	14.31	14.31	50.15	42.34	38.14	sp|P07711|CATL1_HUMAN	Cathepsin L1 OS=Homo sapiens GN=CTSL PE=1 SV=2	HUMAN	17	sp	P07711	CATL1_HUMAN
191	14.24	14.32	22.34	15.8	11.17	sp|P02765|FETUA_HUMAN	Alpha-2-HS-glycoprotein OS=Homo sapiens GN=AHSG PE=1 SV=1	HUMAN	33	sp	P02765	FETUA_HUMAN
192	14.17	14.32	17.75	7.281	6.612	sp|Q9Y490|TLN1_HUMAN	Talin-1 OS=Homo sapiens GN=TLN1 PE=1 SV=3	HUMAN	8	sp	Q9Y490	TLN1_HUMAN
193	14.08	14.09	25.77	14.21	14.21	sp|Q13200|PSMD2_HUMAN	26S proteasome non-ATPase regulatory subunit 2 OS=Homo sapiens GN=PSMD2 PE=1 SV=3	HUMAN	7	sp	Q13200	PSMD2_HUMAN
194	14.07	14.35	39.84	33.98	31.25	sp|P30048|PRDX3_HUMAN	Thioredoxin-dependent peroxide reductase, mitochondrial OS=Homo sapiens GN=PRDX3 PE=1 SV=3	HUMAN	9	sp	P30048	PRDX3_HUMAN
195	13.96	13.96	81.25	56.25	46.88	sp|P62987|RL40_HUMAN	Ubiquitin-60S ribosomal protein L40 OS=Homo sapiens GN=UBA52 PE=1 SV=2	HUMAN	8	sp	P62987	RL40_HUMAN
196	13.83	13.92	49.89	31.85	25.9	sp|P23381|SYWC_HUMAN	Tryptophan--tRNA ligase, cytoplasmic OS=Homo sapiens GN=WARS PE=1 SV=2	HUMAN	7	sp	P23381	SYWC_HUMAN
197	13.79	13.79	42.86	39.12	36.73	sp|P06748|NPM_HUMAN	Nucleophosmin OS=Homo sapiens GN=NPM1 PE=1 SV=2	HUMAN	10	sp	P06748	NPM_HUMAN
198	13.73	13.73	47.73	43.2	35.95	sp|Q9BUD6|SPON2_HUMAN	Spondin-2 OS=Homo sapiens GN=SPON2 PE=1 SV=3	HUMAN	7	sp	Q9BUD6	SPON2_HUMAN
199	13.65	13.65	59.31	54.48	54.48	tr|A0A087WUL2|A0A087WUL2_HUMAN	Proteasome subunit beta type-3 (Fragment) OS=Homo sapiens GN=PSMB3 PE=1 SV=1	HUMAN	9	tr	A0A087WUL2	A0A087WUL2_HUMAN
200	13.62	13.62	49.14	38.29	32.86	sp|O75787|RENR_HUMAN	Renin receptor OS=Homo sapiens GN=ATP6AP2 PE=1 SV=2	HUMAN	8	sp	O75787	RENR_HUMAN
201	13.6	13.6	49.74	34.1	31.54	sp|Q12905|ILF2_HUMAN	Interleukin enhancer-binding factor 2 OS=Homo sapiens GN=ILF2 PE=1 SV=2	HUMAN	7	sp	Q12905	ILF2_HUMAN
202	13.56	39.58	46.93	44.48	34.97	tr|Q6ZN40|Q6ZN40_HUMAN	Tropomyosin 1 (Alpha), isoform CRA_f OS=Homo sapiens GN=TPM1 PE=1 SV=1	HUMAN	26	tr	Q6ZN40	Q6ZN40_HUMAN
203	13.5	13.56	56.04	54.03	46.31	sp|O00560|SDCB1_HUMAN	Syntenin-1 OS=Homo sapiens GN=SDCBP PE=1 SV=1	HUMAN	8	sp	O00560	SDCB1_HUMAN
204	13.46	13.48	35.38	28.21	28.21	sp|Q6NZI2|PTRF_HUMAN	Polymerase I and transcript release factor OS=Homo sapiens GN=PTRF PE=1 SV=1	HUMAN	9	sp	Q6NZI2	PTRF_HUMAN
205	13.37	13.37	68.34	57.79	46.23	sp|P37802|TAGL2_HUMAN	Transgelin-2 OS=Homo sapiens GN=TAGLN2 PE=1 SV=3	HUMAN	12	sp	P37802	TAGL2_HUMAN
206	13.25	13.25	49.48	38.41	34.95	sp|P00491|PNPH_HUMAN	Purine nucleoside phosphorylase OS=Homo sapiens GN=PNP PE=1 SV=2	HUMAN	8	sp	P00491	PNPH_HUMAN
207	13.02	21.09	50.92	43.17	43.17	sp|Q13162|PRDX4_HUMAN	Peroxiredoxin-4 OS=Homo sapiens GN=PRDX4 PE=1 SV=1	HUMAN	15	sp	Q13162	PRDX4_HUMAN
208	12.98	12.98	67.81	48.97	42.12	tr|Q32Q12|Q32Q12_HUMAN	Nucleoside diphosphate kinase OS=Homo sapiens GN=NME1-NME2 PE=1 SV=1	HUMAN	7	tr	Q32Q12	Q32Q12_HUMAN
209	12.91	12.91	54.31	46.34	31.25	sp|P01008|ANT3_HUMAN	Antithrombin-III OS=Homo sapiens GN=SERPINC1 PE=1 SV=1	HUMAN	19	sp	P01008	ANT3_HUMAN
210	12.82	12.87	47.95	34.38	32.49	sp|P05388|RLA0_HUMAN	60S acidic ribosomal protein P0 OS=Homo sapiens GN=RPLP0 PE=1 SV=1	HUMAN	7	sp	P05388	RLA0_HUMAN
211	12.66	12.66	12.86	5.814	5.536	sp|P49327|FAS_HUMAN	Fatty acid synthase OS=Homo sapiens GN=FASN PE=1 SV=3	HUMAN	8	sp	P49327	FAS_HUMAN
212	12.61	12.69	51.71	39.04	31.51	tr|G3V4C1|G3V4C1_HUMAN	Heterogeneous nuclear ribonucleoproteins C1/C2 OS=Homo sapiens GN=HNRNPC PE=1 SV=1	HUMAN	7	tr	G3V4C1	G3V4C1_HUMAN
213	12.57	12.57	21.18	13.8	7.701	tr|Q5T985|Q5T985_HUMAN	Inter-alpha-trypsin inhibitor heavy chain H2 OS=Homo sapiens GN=ITIH2 PE=1 SV=1	HUMAN	9	tr	Q5T985	Q5T985_HUMAN
214	12.56	12.57	37.55	24.14	24.14	sp|P25789|PSA4_HUMAN	Proteasome subunit alpha type-4 OS=Homo sapiens GN=PSMA4 PE=1 SV=1	HUMAN	7	sp	P25789	PSA4_HUMAN
215	12.48	12.52	44.83	44.4	29.31	tr|F8W1A4|F8W1A4_HUMAN	Adenylate kinase 2, mitochondrial OS=Homo sapiens GN=AK2 PE=1 SV=1	HUMAN	9	tr	F8W1A4	F8W1A4_HUMAN
216	12.34	12.34	35.16	28.21	26.53	sp|Q96KP4|CNDP2_HUMAN	Cytosolic non-specific dipeptidase OS=Homo sapiens GN=CNDP2 PE=1 SV=2	HUMAN	8	sp	Q96KP4	CNDP2_HUMAN
217	12.26	12.28	21.16	9.449	8.76	sp|Q9Y6C2|EMIL1_HUMAN	EMILIN-1 OS=Homo sapiens GN=EMILIN1 PE=1 SV=2	HUMAN	6	sp	Q9Y6C2	EMIL1_HUMAN
218	12.03	12.03	38.46	32.23	32.23	sp|Q86UD1|OAF_HUMAN	Out at first protein homolog OS=Homo sapiens GN=OAF PE=2 SV=1	HUMAN	6	sp	Q86UD1	OAF_HUMAN
219	12	12	26.21	10.77	9.646	tr|J3KMX3|J3KMX3_HUMAN	Alpha-fetoprotein OS=Homo sapiens GN=AFP PE=1 SV=1	HUMAN	9	tr	J3KMX3	J3KMX3_HUMAN
220	11.98	11.98	33.05	33.05	25.1	sp|P28072|PSB6_HUMAN	Proteasome subunit beta type-6 OS=Homo sapiens GN=PSMB6 PE=1 SV=4	HUMAN	6	sp	P28072	PSB6_HUMAN
221	11.91	11.91	33.56	22.69	17.36	tr|D6RER5|D6RER5_HUMAN	Septin-11 OS=Homo sapiens GN=SEPT11 PE=1 SV=1	HUMAN	8	tr	D6RER5	D6RER5_HUMAN
222	11.89	11.91	33.97	20	13.24	tr|A0A087WXE9|A0A087WXE9_HUMAN	Inactive serine protease PAMR1 OS=Homo sapiens GN=PAMR1 PE=1 SV=1	HUMAN	10	tr	A0A087WXE9	A0A087WXE9_HUMAN
223	11.85	11.95	19.39	3.609	2.773	sp|Q07954|LRP1_HUMAN	Prolow-density lipoprotein receptor-related protein 1 OS=Homo sapiens GN=LRP1 PE=1 SV=2	HUMAN	7	sp	Q07954	LRP1_HUMAN
224	11.85	11.9	50	37.1	29.84	sp|P18124|RL7_HUMAN	60S ribosomal protein L7 OS=Homo sapiens GN=RPL7 PE=1 SV=1	HUMAN	8	sp	P18124	RL7_HUMAN
225	11.77	11.77	36.62	22	18.06	sp|P12956|XRCC6_HUMAN	X-ray repair cross-complementing protein 6 OS=Homo sapiens GN=XRCC6 PE=1 SV=2	HUMAN	7	sp	P12956	XRCC6_HUMAN
226	11.75	11.87	53.05	49.39	42.38	sp|Q96D15|RCN3_HUMAN	Reticulocalbin-3 OS=Homo sapiens GN=RCN3 PE=1 SV=1	HUMAN	7	sp	Q96D15	RCN3_HUMAN
227	11.7	18.46	67.76	43.27	36.33	sp|P27348|1433T_HUMAN	14-3-3 protein theta OS=Homo sapiens GN=YWHAQ PE=1 SV=1	HUMAN	13	sp	P27348	1433T_HUMAN
228	11.7	11.7	35.39	20.16	16.57	sp|Q14764|MVP_HUMAN	Major vault protein OS=Homo sapiens GN=MVP PE=1 SV=4	HUMAN	6	sp	Q14764	MVP_HUMAN
229	11.67	11.67	29.21	17.53	12.37	sp|Q96AY3|FKB10_HUMAN	Peptidyl-prolyl cis-trans isomerase FKBP10 OS=Homo sapiens GN=FKBP10 PE=1 SV=1	HUMAN	8	sp	Q96AY3	FKB10_HUMAN
230	11.64	11.64	42.74	39.42	29.46	sp|O00299|CLIC1_HUMAN	Chloride intracellular channel protein 1 OS=Homo sapiens GN=CLIC1 PE=1 SV=4	HUMAN	7	sp	O00299	CLIC1_HUMAN
231	11.6	12.37	27.06	11.75	9.354	sp|Q05707|COEA1_HUMAN	Collagen alpha-1(XIV) chain OS=Homo sapiens GN=COL14A1 PE=1 SV=3	HUMAN	9	sp	Q05707	COEA1_HUMAN
232	11.49	11.49	33.83	26.69	26.69	sp|P62424|RL7A_HUMAN	60S ribosomal protein L7a OS=Homo sapiens GN=RPL7A PE=1 SV=2	HUMAN	8	sp	P62424	RL7A_HUMAN
233	11.38	11.38	35.24	22.93	19.53	sp|P48723|HSP13_HUMAN	Heat shock 70 kDa protein 13 OS=Homo sapiens GN=HSPA13 PE=1 SV=1	HUMAN	7	sp	P48723	HSP13_HUMAN
234	11.36	20.94	37.27	25.46	22.76	sp|P23142|FBLN1_HUMAN	Fibulin-1 OS=Homo sapiens GN=FBLN1 PE=1 SV=4	HUMAN	17	sp	P23142	FBLN1_HUMAN
235	11.31	11.32	38.27	18.45	18.45	sp|Q08629|TICN1_HUMAN	Testican-1 OS=Homo sapiens GN=SPOCK1 PE=1 SV=1	HUMAN	7	sp	Q08629	TICN1_HUMAN
236	11.31	11.31	37.93	22.72	17.65	sp|Q16658|FSCN1_HUMAN	Fascin OS=Homo sapiens GN=FSCN1 PE=1 SV=3	HUMAN	7	sp	Q16658	FSCN1_HUMAN
237	11.22	11.22	65.34	45.13	33.94	sp|P16152|CBR1_HUMAN	Carbonyl reductase [NADPH] 1 OS=Homo sapiens GN=CBR1 PE=1 SV=3	HUMAN	6	sp	P16152	CBR1_HUMAN
238	11.13	11.13	19.44	17.93	17.93	sp|Q6UXB8|PI16_HUMAN	Peptidase inhibitor 16 OS=Homo sapiens GN=PI16 PE=1 SV=1	HUMAN	10	sp	Q6UXB8	PI16_HUMAN
239	11.08	11.7	30.13	20.15	18.83	sp|P40227|TCPZ_HUMAN	T-complex protein 1 subunit zeta OS=Homo sapiens GN=CCT6A PE=1 SV=3	HUMAN	6	sp	P40227	TCPZ_HUMAN
240	11.05	11.05	50	33.93	33.93	sp|P59998|ARPC4_HUMAN	Actin-related protein 2/3 complex subunit 4 OS=Homo sapiens GN=ARPC4 PE=1 SV=3	HUMAN	6	sp	P59998	ARPC4_HUMAN
241	10.98	11.24	58.57	50.95	41.43	tr|Q5T9B7|Q5T9B7_HUMAN	Adenylate kinase isoenzyme 1 OS=Homo sapiens GN=AK1 PE=1 SV=1	HUMAN	7	tr	Q5T9B7	Q5T9B7_HUMAN
242	10.85	11.09	41.23	23.69	16.82	sp|P25705|ATPA_HUMAN	ATP synthase subunit alpha, mitochondrial OS=Homo sapiens GN=ATP5A1 PE=1 SV=1	HUMAN	7	sp	P25705	ATPA_HUMAN
243	10.83	10.83	55.41	41.44	41.44	sp|P04179|SODM_HUMAN	Superoxide dismutase [Mn], mitochondrial OS=Homo sapiens GN=SOD2 PE=1 SV=2	HUMAN	8	sp	P04179	SODM_HUMAN
244	10.82	10.82	39.17	21.43	21.43	sp|O60664|PLIN3_HUMAN	Perilipin-3 OS=Homo sapiens GN=PLIN3 PE=1 SV=3	HUMAN	6	sp	O60664	PLIN3_HUMAN
245	10.81	10.81	36.29	22.03	15.33	sp|P61978|HNRPK_HUMAN	Heterogeneous nuclear ribonucleoprotein K OS=Homo sapiens GN=HNRNPK PE=1 SV=1	HUMAN	5	sp	P61978	HNRPK_HUMAN
246	10.8	10.8	59.85	46.97	27.27	tr|K7EK07|K7EK07_HUMAN	Histone H3 (Fragment) OS=Homo sapiens GN=H3F3B PE=1 SV=1	HUMAN	6	tr	K7EK07	K7EK07_HUMAN
247	10.62	10.76	95.1	81.37	65.69	sp|P61604|CH10_HUMAN	10 kDa heat shock protein, mitochondrial OS=Homo sapiens GN=HSPE1 PE=1 SV=2	HUMAN	8	sp	P61604	CH10_HUMAN
248	10.6	10.6	64.79	44.37	44.37	sp|P69905|HBA_HUMAN	Hemoglobin subunit alpha OS=Homo sapiens GN=HBA1 PE=1 SV=2	HUMAN	13	sp	P69905	HBA_HUMAN
249	10.48	10.48	19.97	10.87	8.152	sp|Q32P28|P3H1_HUMAN	Prolyl 3-hydroxylase 1 OS=Homo sapiens GN=LEPRE1 PE=1 SV=2	HUMAN	5	sp	Q32P28	P3H1_HUMAN
250	10.4	10.4	13.47	11.36	7.133	sp|Q9HCU0|CD248_HUMAN	Endosialin OS=Homo sapiens GN=CD248 PE=1 SV=1	HUMAN	6	sp	Q9HCU0	CD248_HUMAN
251	10.39	18.06	47.56	39.43	37.4	sp|Q04917|1433F_HUMAN	14-3-3 protein eta OS=Homo sapiens GN=YWHAH PE=1 SV=4	HUMAN	12	sp	Q04917	1433F_HUMAN
252	10.37	10.37	58.4	34.87	28.15	tr|B7Z6Z4|B7Z6Z4_HUMAN	Myosin light polypeptide 6 OS=Homo sapiens GN=MYL6 PE=1 SV=1	HUMAN	9	tr	B7Z6Z4	B7Z6Z4_HUMAN
253	10.34	10.34	26.37	16.96	7.239	sp|P15144|AMPN_HUMAN	Aminopeptidase N OS=Homo sapiens GN=ANPEP PE=1 SV=4	HUMAN	6	sp	P15144	AMPN_HUMAN
254	10.33	10.33	50.21	27.8	27.8	sp|P28066|PSA5_HUMAN	Proteasome subunit alpha type-5 OS=Homo sapiens GN=PSMA5 PE=1 SV=3	HUMAN	7	sp	P28066	PSA5_HUMAN
255	10.31	10.31	49.57	26.08	18.1	sp|P78539|SRPX_HUMAN	Sushi repeat-containing protein SRPX OS=Homo sapiens GN=SRPX PE=1 SV=1	HUMAN	8	sp	P78539	SRPX_HUMAN
256	10.3	10.3	20.88	15.26	14.06	tr|X6R8A1|X6R8A1_HUMAN	Carboxypeptidase OS=Homo sapiens GN=CTSA PE=1 SV=1	HUMAN	6	tr	X6R8A1	X6R8A1_HUMAN
257	10.17	10.17	60.85	52.38	38.62	sp|Q99497|PARK7_HUMAN	Protein deglycase DJ-1 OS=Homo sapiens GN=PARK7 PE=1 SV=2	HUMAN	6	sp	Q99497	PARK7_HUMAN
258	10.07	10.44	21.26	21.26	14.95	sp|O14498|ISLR_HUMAN	Immunoglobulin superfamily containing leucine-rich repeat protein OS=Homo sapiens GN=ISLR PE=1 SV=1	HUMAN	12	sp	O14498	ISLR_HUMAN
259	10.04	10.04	32.74	10	10	sp|P34932|HSP74_HUMAN	Heat shock 70 kDa protein 4 OS=Homo sapiens GN=HSPA4 PE=1 SV=4	HUMAN	5	sp	P34932	HSP74_HUMAN
260	9.96	9.99	26.7	16.67	14.16	sp|P00367|DHE3_HUMAN	Glutamate dehydrogenase 1, mitochondrial OS=Homo sapiens GN=GLUD1 PE=1 SV=2	HUMAN	5	sp	P00367	DHE3_HUMAN
261	9.74	9.74	31.11	13.33	13.33	tr|H0Y2Y8|H0Y2Y8_HUMAN	Zyxin (Fragment) OS=Homo sapiens GN=ZYX PE=1 SV=1	HUMAN	5	tr	H0Y2Y8	H0Y2Y8_HUMAN
262	9.6	9.6	60.87	45.85	40.71	sp|P00746|CFAD_HUMAN	Complement factor D OS=Homo sapiens GN=CFD PE=1 SV=5	HUMAN	6	sp	P00746	CFAD_HUMAN
263	9.59	9.59	23.12	14.24	11.03	sp|P33908|MA1A1_HUMAN	Mannosyl-oligosaccharide 1,2-alpha-mannosidase IA OS=Homo sapiens GN=MAN1A1 PE=1 SV=3	HUMAN	5	sp	P33908	MA1A1_HUMAN
264	9.56	9.56	32.68	24.12	21.4	sp|P62917|RL8_HUMAN	60S ribosomal protein L8 OS=Homo sapiens GN=RPL8 PE=1 SV=2	HUMAN	5	sp	P62917	RL8_HUMAN
265	9.53	9.53	43.41	22.83	19.94	sp|Q641Q3|METRL_HUMAN	Meteorin-like protein OS=Homo sapiens GN=METRNL PE=2 SV=1	HUMAN	7	sp	Q641Q3	METRL_HUMAN
266	9.52	9.52	18.39	5.562	4.824	sp|Q8N6G6|ATL1_HUMAN	ADAMTS-like protein 1 OS=Homo sapiens GN=ADAMTSL1 PE=1 SV=4	HUMAN	6	sp	Q8N6G6	ATL1_HUMAN
267	9.49	9.49	52.74	45.27	40.3	sp|P49721|PSB2_HUMAN	Proteasome subunit beta type-2 OS=Homo sapiens GN=PSMB2 PE=1 SV=1	HUMAN	8	sp	P49721	PSB2_HUMAN
268	9.48	9.48	25.96	6.995	5.705	sp|Q09666|AHNK_HUMAN	Neuroblast differentiation-associated protein AHNAK OS=Homo sapiens GN=AHNAK PE=1 SV=2	HUMAN	10	sp	Q09666	AHNK_HUMAN
269	9.44	9.44	42.59	37.04	37.04	tr|M0R261|M0R261_HUMAN	6-phosphogluconolactonase (Fragment) OS=Homo sapiens GN=PGLS PE=1 SV=1	HUMAN	5	tr	M0R261	M0R261_HUMAN
270	9.37	9.37	9.221	4.72	4.72	sp|P19827|ITIH1_HUMAN	Inter-alpha-trypsin inhibitor heavy chain H1 OS=Homo sapiens GN=ITIH1 PE=1 SV=3	HUMAN	7	sp	P19827	ITIH1_HUMAN
271	9.35	9.35	33.99	18.97	18.97	sp|Q9BS26|ERP44_HUMAN	Endoplasmic reticulum resident protein 44 OS=Homo sapiens GN=ERP44 PE=1 SV=1	HUMAN	6	sp	Q9BS26	ERP44_HUMAN
272	9.35	9.35	45.07	20.94	20.94	sp|P60842|IF4A1_HUMAN	Eukaryotic initiation factor 4A-I OS=Homo sapiens GN=EIF4A1 PE=1 SV=1	HUMAN	6	sp	P60842	IF4A1_HUMAN
273	9.34	9.34	26.27	22.08	18.32	tr|G3V4U0|G3V4U0_HUMAN	Fibulin-5 OS=Homo sapiens GN=FBLN5 PE=1 SV=1	HUMAN	9	tr	G3V4U0	G3V4U0_HUMAN
274	9.3	10.25	47.38	24.52	18.1	tr|V9HW75|V9HW75_HUMAN	Epididymis secretory protein Li 109 OS=Homo sapiens GN=HEL-S-109 PE=1 SV=1	HUMAN	10	tr	V9HW75	V9HW75_HUMAN
275	9.23	9.23	26.8	18.64	16.7	sp|P11413|G6PD_HUMAN	Glucose-6-phosphate 1-dehydrogenase OS=Homo sapiens GN=G6PD PE=1 SV=4	HUMAN	6	sp	P11413	G6PD_HUMAN
276	9.19	9.19	31.69	8.607	8.607	sp|P13010|XRCC5_HUMAN	X-ray repair cross-complementing protein 5 OS=Homo sapiens GN=XRCC5 PE=1 SV=3	HUMAN	6	sp	P13010	XRCC5_HUMAN
277	9.18	9.18	28.01	16.88	15.58	sp|P50991|TCPD_HUMAN	T-complex protein 1 subunit delta OS=Homo sapiens GN=CCT4 PE=1 SV=4	HUMAN	5	sp	P50991	TCPD_HUMAN
278	9.14	9.14	49	30.67	27.67	sp|O15144|ARPC2_HUMAN	Actin-related protein 2/3 complex subunit 2 OS=Homo sapiens GN=ARPC2 PE=1 SV=1	HUMAN	6	sp	O15144	ARPC2_HUMAN
279	8.97	8.97	54.04	35.86	31.82	tr|H3BSC1|H3BSC1_HUMAN	Ras-related protein Rab-11A OS=Homo sapiens GN=RAB11A PE=1 SV=1	HUMAN	6	tr	H3BSC1	H3BSC1_HUMAN
280	8.93	8.93	27.19	21.56	20.62	tr|J3KQJ1|J3KQJ1_HUMAN	Sulfatase-modifying factor 2 OS=Homo sapiens GN=SUMF2 PE=1 SV=1	HUMAN	6	tr	J3KQJ1	J3KQJ1_HUMAN
281	8.9	10.1	56.13	51.38	39.53	sp|Q9Y696|CLIC4_HUMAN	Chloride intracellular channel protein 4 OS=Homo sapiens GN=CLIC4 PE=1 SV=4	HUMAN	11	sp	Q9Y696	CLIC4_HUMAN
282	8.84	8.84	19.79	9.961	9.961	sp|Q06481|APLP2_HUMAN	Amyloid-like protein 2 OS=Homo sapiens GN=APLP2 PE=1 SV=2	HUMAN	6	sp	Q06481	APLP2_HUMAN
283	8.81	8.81	48.29	36.5	26.62	sp|P62701|RS4X_HUMAN	40S ribosomal protein S4, X isoform OS=Homo sapiens GN=RPS4X PE=1 SV=2	HUMAN	8	sp	P62701	RS4X_HUMAN
284	8.81	8.81	46.08	29.03	29.03	sp|P62906|RL10A_HUMAN	60S ribosomal protein L10a OS=Homo sapiens GN=RPL10A PE=1 SV=2	HUMAN	6	sp	P62906	RL10A_HUMAN
285	8.77	8.8	27.59	8.506	5.125	sp|P19367|HXK1_HUMAN	Hexokinase-1 OS=Homo sapiens GN=HK1 PE=1 SV=3	HUMAN	6	sp	P19367	HXK1_HUMAN
286	8.76	8.77	43.75	41.25	25.42	sp|P24592|IBP6_HUMAN	Insulin-like growth factor-binding protein 6 OS=Homo sapiens GN=IGFBP6 PE=1 SV=1	HUMAN	9	sp	P24592	IBP6_HUMAN
287	8.72	9.4	33.25	25.63	25.63	sp|P61160|ARP2_HUMAN	Actin-related protein 2 OS=Homo sapiens GN=ACTR2 PE=1 SV=1	HUMAN	9	sp	P61160	ARP2_HUMAN
288	8.68	8.68	39.06	30.04	30.04	tr|B5MDF5|B5MDF5_HUMAN	GTP-binding nuclear protein Ran OS=Homo sapiens GN=RAN PE=1 SV=1	HUMAN	6	tr	B5MDF5	B5MDF5_HUMAN
289	8.65	8.65	45.68	33.95	31.48	sp|P67809|YBOX1_HUMAN	Nuclease-sensitive element-binding protein 1 OS=Homo sapiens GN=YBX1 PE=1 SV=3	HUMAN	5	sp	P67809	YBOX1_HUMAN
290	8.62	8.62	39.71	24.64	22.32	tr|F8W914|F8W914_HUMAN	Reticulon OS=Homo sapiens GN=RTN4 PE=1 SV=1	HUMAN	5	tr	F8W914	F8W914_HUMAN
291	8.6	9.16	31.07	16.45	15.14	sp|O95084|PRS23_HUMAN	Serine protease 23 OS=Homo sapiens GN=PRSS23 PE=1 SV=1	HUMAN	5	sp	O95084	PRS23_HUMAN
292	8.6	8.6	38.66	21.22	21.22	sp|P16870|CBPE_HUMAN	Carboxypeptidase E OS=Homo sapiens GN=CPE PE=1 SV=1	HUMAN	8	sp	P16870	CBPE_HUMAN
293	8.53	8.53	51.5	35.88	27.57	tr|B1AK88|B1AK88_HUMAN	Capping protein (Actin filament) muscle Z-line, beta, isoform CRA_d OS=Homo sapiens GN=CAPZB PE=1 SV=1	HUMAN	7	tr	B1AK88	B1AK88_HUMAN
294	8.45	8.45	44.92	23.7	16.48	sp|O95967|FBLN4_HUMAN	EGF-containing fibulin-like extracellular matrix protein 2 OS=Homo sapiens GN=EFEMP2 PE=1 SV=3	HUMAN	6	sp	O95967	FBLN4_HUMAN
295	8.43	8.43	25.57	5.84	4.843	sp|Q92954|PRG4_HUMAN	Proteoglycan 4 OS=Homo sapiens GN=PRG4 PE=1 SV=2	HUMAN	7	sp	Q92954	PRG4_HUMAN
296	8.43	8.43	25.87	18.48	10.16	sp|Q99538|LGMN_HUMAN	Legumain OS=Homo sapiens GN=LGMN PE=1 SV=1	HUMAN	4	sp	Q99538	LGMN_HUMAN
297	8.41	8.41	12.25	8.057	6.954	sp|P19022|CADH2_HUMAN	Cadherin-2 OS=Homo sapiens GN=CDH2 PE=1 SV=4	HUMAN	5	sp	P19022	CADH2_HUMAN
298	8.39	8.4	29.22	12.2	10.05	sp|Q16394|EXT1_HUMAN	Exostosin-1 OS=Homo sapiens GN=EXT1 PE=1 SV=2	HUMAN	5	sp	Q16394	EXT1_HUMAN
299	8.37	8.37	32.17	25.97	20.54	sp|P22692|IBP4_HUMAN	Insulin-like growth factor-binding protein 4 OS=Homo sapiens GN=IGFBP4 PE=1 SV=2	HUMAN	10	sp	P22692	IBP4_HUMAN
300	8.29	8.29	44.53	39.06	35.94	sp|Q99878|H2A1J_HUMAN	Histone H2A type 1-J OS=Homo sapiens GN=HIST1H2AJ PE=1 SV=3	HUMAN	5	sp	Q99878	H2A1J_HUMAN
301	8.26	8.85	39.37	23.91	19.57	sp|O75874|IDHC_HUMAN	Isocitrate dehydrogenase [NADP] cytoplasmic OS=Homo sapiens GN=IDH1 PE=1 SV=2	HUMAN	5	sp	O75874	IDHC_HUMAN
302	8.21	8.21	41.86	22.33	21.86	sp|P09429|HMGB1_HUMAN	High mobility group protein B1 OS=Homo sapiens GN=HMGB1 PE=1 SV=3	HUMAN	4	sp	P09429	HMGB1_HUMAN
303	8.19	8.34	50.5	46.53	41.58	tr|C9JFR7|C9JFR7_HUMAN	Cytochrome c (Fragment) OS=Homo sapiens GN=CYCS PE=1 SV=1	HUMAN	6	tr	C9JFR7	C9JFR7_HUMAN
304	8.19	8.19	27.73	12.84	9.667	tr|A0A087X1X7|A0A087X1X7_HUMAN	Elongation factor 1-delta OS=Homo sapiens GN=EEF1D PE=1 SV=1	HUMAN	4	tr	A0A087X1X7	A0A087X1X7_HUMAN
305	8.16	8.16	20.89	6.616	5.86	sp|P22314|UBA1_HUMAN	Ubiquitin-like modifier-activating enzyme 1 OS=Homo sapiens GN=UBA1 PE=1 SV=3	HUMAN	4	sp	P22314	UBA1_HUMAN
306	8.15	8.16	45.6	32.8	30	sp|P17931|LEG3_HUMAN	Galectin-3 OS=Homo sapiens GN=LGALS3 PE=1 SV=5	HUMAN	7	sp	P17931	LEG3_HUMAN
307	8.15	8.15	26.41	11.13	11.13	sp|Q96TA1|NIBL1_HUMAN	Niban-like protein 1 OS=Homo sapiens GN=FAM129B PE=1 SV=3	HUMAN	5	sp	Q96TA1	NIBL1_HUMAN
308	8.15	8.15	23.84	9.713	8.499	tr|E9PEP6|E9PEP6_HUMAN	Neuropilin-1 OS=Homo sapiens GN=NRP1 PE=1 SV=2	HUMAN	4	tr	E9PEP6	E9PEP6_HUMAN
309	8.12	8.24	24.96	13.07	10.53	sp|P30153|2AAA_HUMAN	Serine/threonine-protein phosphatase 2A 65 kDa regulatory subunit A alpha isoform OS=Homo sapiens GN=PPP2R1A PE=1 SV=4	HUMAN	6	sp	P30153	2AAA_HUMAN
310	8.12	8.2	38.74	23.87	23.87	tr|A0A087WYR3|A0A087WYR3_HUMAN	Tumor protein D54 OS=Homo sapiens GN=TPD52L2 PE=1 SV=1	HUMAN	5	tr	A0A087WYR3	A0A087WYR3_HUMAN
311	8.12	8.13	23.6	10.56	8.989	sp|Q06033|ITIH3_HUMAN	Inter-alpha-trypsin inhibitor heavy chain H3 OS=Homo sapiens GN=ITIH3 PE=1 SV=2	HUMAN	7	sp	Q06033	ITIH3_HUMAN
312	8.08	8.08	42.81	23.65	17.66	sp|P40925|MDHC_HUMAN	Malate dehydrogenase, cytoplasmic OS=Homo sapiens GN=MDH1 PE=1 SV=4	HUMAN	6	sp	P40925	MDHC_HUMAN
313	8.01	8.01	46.53	29.21	26.24	sp|P05452|TETN_HUMAN	Tetranectin OS=Homo sapiens GN=CLEC3B PE=1 SV=3	HUMAN	5	sp	P05452	TETN_HUMAN
314	8	34.41	46.97	46.97	46.97	sp|P68371|TBB4B_HUMAN	Tubulin beta-4B chain OS=Homo sapiens GN=TUBB4B PE=1 SV=1	HUMAN	27	sp	P68371	TBB4B_HUMAN
315	7.97	7.97	64.85	44.85	35.15	sp|P62937|PPIA_HUMAN	Peptidyl-prolyl cis-trans isomerase A OS=Homo sapiens GN=PPIA PE=1 SV=2	HUMAN	5	sp	P62937	PPIA_HUMAN
316	7.97	7.97	29.58	18.03	18.03	sp|Q14103|HNRPD_HUMAN	Heterogeneous nuclear ribonucleoprotein D0 OS=Homo sapiens GN=HNRNPD PE=1 SV=1	HUMAN	6	sp	Q14103	HNRPD_HUMAN
317	7.88	7.88	38.19	20.68	14.14	sp|Q9ULV4|COR1C_HUMAN	Coronin-1C OS=Homo sapiens GN=CORO1C PE=1 SV=1	HUMAN	4	sp	Q9ULV4	COR1C_HUMAN
318	7.88	7.88	45.5	18.48	15.88	sp|O75462|CRLF1_HUMAN	Cytokine receptor-like factor 1 OS=Homo sapiens GN=CRLF1 PE=1 SV=1	HUMAN	4	sp	O75462	CRLF1_HUMAN
319	7.84	7.84	30.86	20.37	18.72	tr|E9PEX6|E9PEX6_HUMAN	Dihydrolipoyl dehydrogenase, mitochondrial OS=Homo sapiens GN=DLD PE=1 SV=1	HUMAN	8	tr	E9PEX6	E9PEX6_HUMAN
320	7.82	7.82	39.49	17.52	13.32	sp|Q13838|DX39B_HUMAN	Spliceosome RNA helicase DDX39B OS=Homo sapiens GN=DDX39B PE=1 SV=1	HUMAN	5	sp	Q13838	DX39B_HUMAN
321	7.79	7.79	40.06	17.98	12.93	sp|P63244|GBLP_HUMAN	Guanine nucleotide-binding protein subunit beta-2-like 1 OS=Homo sapiens GN=GNB2L1 PE=1 SV=3	HUMAN	4	sp	P63244	GBLP_HUMAN
322	7.77	7.78	33.49	11.64	8.962	sp|P11940|PABP1_HUMAN	Polyadenylate-binding protein 1 OS=Homo sapiens GN=PABPC1 PE=1 SV=2	HUMAN	5	sp	P11940	PABP1_HUMAN
323	7.77	7.77	42.4	22.55	16.91	sp|P05455|LA_HUMAN	Lupus La protein OS=Homo sapiens GN=SSB PE=1 SV=2	HUMAN	5	sp	P05455	LA_HUMAN
324	7.77	7.77	25.25	8.617	8.617	tr|Q5SZU1|Q5SZU1_HUMAN	D-3-phosphoglycerate dehydrogenase OS=Homo sapiens GN=PHGDH PE=1 SV=1	HUMAN	4	tr	Q5SZU1	Q5SZU1_HUMAN
325	7.74	7.74	70.08	36.74	25	sp|P61247|RS3A_HUMAN	40S ribosomal protein S3a OS=Homo sapiens GN=RPS3A PE=1 SV=2	HUMAN	8	sp	P61247	RS3A_HUMAN
326	7.71	7.71	50.91	41.21	32.12	sp|P30050|RL12_HUMAN	60S ribosomal protein L12 OS=Homo sapiens GN=RPL12 PE=1 SV=1	HUMAN	6	sp	P30050	RL12_HUMAN
327	7.69	7.69	51.05	22.11	22.11	tr|J3QQ67|J3QQ67_HUMAN	60S ribosomal protein L18 (Fragment) OS=Homo sapiens GN=RPL18 PE=1 SV=1	HUMAN	4	tr	J3QQ67	J3QQ67_HUMAN
328	7.68	7.71	16.53	8.744	8.744	sp|P17405|ASM_HUMAN	Sphingomyelin phosphodiesterase OS=Homo sapiens GN=SMPD1 PE=1 SV=4	HUMAN	4	sp	P17405	ASM_HUMAN
329	7.6	7.6	21.86	11.61	11.61	tr|E7EUC7|E7EUC7_HUMAN	UTP--glucose-1-phosphate uridylyltransferase OS=Homo sapiens GN=UGP2 PE=1 SV=1	HUMAN	4	tr	E7EUC7	E7EUC7_HUMAN
330	7.53	7.53	17.18	11.52	9.506	sp|P22307|NLTP_HUMAN	Non-specific lipid-transfer protein OS=Homo sapiens GN=SCP2 PE=1 SV=2	HUMAN	6	sp	P22307	NLTP_HUMAN
331	7.51	7.51	17.58	4.61	4.61	sp|Q13219|PAPP1_HUMAN	Pappalysin-1 OS=Homo sapiens GN=PAPPA PE=1 SV=3	HUMAN	4	sp	Q13219	PAPP1_HUMAN
332	7.5	7.5	60.96	30.14	19.86	sp|P01034|CYTC_HUMAN	Cystatin-C OS=Homo sapiens GN=CST3 PE=1 SV=1	HUMAN	9	sp	P01034	CYTC_HUMAN
333	7.43	7.46	28.44	22.67	22.67	sp|P24534|EF1B_HUMAN	Elongation factor 1-beta OS=Homo sapiens GN=EEF1B2 PE=1 SV=3	HUMAN	6	sp	P24534	EF1B_HUMAN
334	7.42	7.43	49.13	15.71	13.47	sp|Q8NBJ4|GOLM1_HUMAN	Golgi membrane protein 1 OS=Homo sapiens GN=GOLM1 PE=1 SV=1	HUMAN	4	sp	Q8NBJ4	GOLM1_HUMAN
335	7.39	7.39	22.87	20.74	18.62	sp|Q06828|FMOD_HUMAN	Fibromodulin OS=Homo sapiens GN=FMOD PE=1 SV=2	HUMAN	5	sp	Q06828	FMOD_HUMAN
336	7.36	7.36	48.58	34.01	25.1	sp|Q9UFN0|NPS3A_HUMAN	Protein NipSnap homolog 3A OS=Homo sapiens GN=NIPSNAP3A PE=1 SV=2	HUMAN	5	sp	Q9UFN0	NPS3A_HUMAN
337	7.34	7.39	29.07	9.967	9.967	sp|Q07065|CKAP4_HUMAN	Cytoskeleton-associated protein 4 OS=Homo sapiens GN=CKAP4 PE=1 SV=2	HUMAN	4	sp	Q07065	CKAP4_HUMAN
338	7.34	7.34	41.75	22.2	14.87	sp|P43490|NAMPT_HUMAN	Nicotinamide phosphoribosyltransferase OS=Homo sapiens GN=NAMPT PE=1 SV=1	HUMAN	5	sp	P43490	NAMPT_HUMAN
339	7.31	7.31	33.55	13.8	8.668	sp|O60506|HNRPQ_HUMAN	Heterogeneous nuclear ribonucleoprotein Q OS=Homo sapiens GN=SYNCRIP PE=1 SV=2	HUMAN	5	sp	O60506	HNRPQ_HUMAN
340	7.3	7.3	30.11	12.54	10.39	sp|P35052|GPC1_HUMAN	Glypican-1 OS=Homo sapiens GN=GPC1 PE=1 SV=2	HUMAN	4	sp	P35052	GPC1_HUMAN
341	7.14	7.14	25.54	6.522	6.522	tr|F5H365|F5H365_HUMAN	Protein transport protein Sec23A OS=Homo sapiens GN=SEC23A PE=1 SV=1	HUMAN	4	tr	F5H365	F5H365_HUMAN
342	7.1	7.32	13.24	8.333	7.534	sp|Q14974|IMB1_HUMAN	Importin subunit beta-1 OS=Homo sapiens GN=KPNB1 PE=1 SV=2	HUMAN	5	sp	Q14974	IMB1_HUMAN
343	7.1	7.11	21.64	11.57	11.57	tr|Q5T5C7|Q5T5C7_HUMAN	Serine--tRNA ligase, cytoplasmic OS=Homo sapiens GN=SARS PE=1 SV=1	HUMAN	4	tr	Q5T5C7	Q5T5C7_HUMAN
344	7.09	7.09	45.71	45.71	45.71	sp|P31949|S10AB_HUMAN	Protein S100-A11 OS=Homo sapiens GN=S100A11 PE=1 SV=2	HUMAN	6	sp	P31949	S10AB_HUMAN
345	7.07	7.07	30.72	13.98	12.71	tr|G8JLB6|G8JLB6_HUMAN	Heterogeneous nuclear ribonucleoprotein H OS=Homo sapiens GN=HNRNPH1 PE=1 SV=1	HUMAN	4	tr	G8JLB6	G8JLB6_HUMAN
346	6.99	7.84	17.93	4.556	3.797	sp|P08572|CO4A2_HUMAN	Collagen alpha-2(IV) chain OS=Homo sapiens GN=COL4A2 PE=1 SV=4	HUMAN	5	sp	P08572	CO4A2_HUMAN
347	6.96	6.96	21.82	12.71	10.44	tr|C9JIZ6|C9JIZ6_HUMAN	Prosaposin OS=Homo sapiens GN=PSAP PE=1 SV=2	HUMAN	6	tr	C9JIZ6	C9JIZ6_HUMAN
348	6.93	6.95	18.33	2.805	2.307	sp|Q07092|COGA1_HUMAN	Collagen alpha-1(XVI) chain OS=Homo sapiens GN=COL16A1 PE=1 SV=2	HUMAN	5	sp	Q07092	COGA1_HUMAN
349	6.91	6.91	40.82	33.23	16.14	sp|P15121|ALDR_HUMAN	Aldose reductase OS=Homo sapiens GN=AKR1B1 PE=1 SV=3	HUMAN	4	sp	P15121	ALDR_HUMAN
350	6.87	6.9	25.11	16.74	14.93	sp|Q9BRK3|MXRA8_HUMAN	Matrix-remodeling-associated protein 8 OS=Homo sapiens GN=MXRA8 PE=2 SV=1	HUMAN	6	sp	Q9BRK3	MXRA8_HUMAN
351	6.87	6.87	34.63	23.81	23.81	tr|K9J957|K9J957_HUMAN	Proteasome activator complex subunit 3 OS=Homo sapiens GN=PSME3 PE=1 SV=1	HUMAN	4	tr	K9J957	K9J957_HUMAN
352	6.8	6.8	17.71	7.59	5.593	sp|Q99985|SEM3C_HUMAN	Semaphorin-3C OS=Homo sapiens GN=SEMA3C PE=1 SV=2	HUMAN	4	sp	Q99985	SEM3C_HUMAN
353	6.78	6.78	34.35	14.78	11.52	tr|E9PFW3|E9PFW3_HUMAN	AP-2 complex subunit mu OS=Homo sapiens GN=AP2M1 PE=1 SV=1	HUMAN	5	tr	E9PFW3	E9PFW3_HUMAN
354	6.74	11.32	42.45	14.93	14.03	sp|P17987|TCPA_HUMAN	T-complex protein 1 subunit alpha OS=Homo sapiens GN=TCP1 PE=1 SV=1	HUMAN	7	sp	P17987	TCPA_HUMAN
355	6.73	6.74	22.59	9.807	8.767	sp|P08133|ANXA6_HUMAN	Annexin A6 OS=Homo sapiens GN=ANXA6 PE=1 SV=3	HUMAN	4	sp	P08133	ANXA6_HUMAN
356	6.73	6.74	45.89	38.65	33.82	sp|P51149|RAB7A_HUMAN	Ras-related protein Rab-7a OS=Homo sapiens GN=RAB7A PE=1 SV=1	HUMAN	5	sp	P51149	RAB7A_HUMAN
357	6.73	6.73	40.13	32.89	26.97	sp|P62269|RS18_HUMAN	40S ribosomal protein S18 OS=Homo sapiens GN=RPS18 PE=1 SV=3	HUMAN	4	sp	P62269	RS18_HUMAN
358	6.7	6.7	26.76	12.52	9.488	sp|P04040|CATA_HUMAN	Catalase OS=Homo sapiens GN=CAT PE=1 SV=3	HUMAN	4	sp	P04040	CATA_HUMAN
359	6.69	6.69	49.32	37.84	37.84	sp|Q04837|SSBP_HUMAN	Single-stranded DNA-binding protein, mitochondrial OS=Homo sapiens GN=SSBP1 PE=1 SV=1	HUMAN	4	sp	Q04837	SSBP_HUMAN
360	6.68	6.68	58.47	38.14	38.14	sp|P62316|SMD2_HUMAN	Small nuclear ribonucleoprotein Sm D2 OS=Homo sapiens GN=SNRPD2 PE=1 SV=1	HUMAN	6	sp	P62316	SMD2_HUMAN
361	6.65	7.93	56.39	24.58	16.87	sp|Q9UKZ9|PCOC2_HUMAN	Procollagen C-endopeptidase enhancer 2 OS=Homo sapiens GN=PCOLCE2 PE=1 SV=1	HUMAN	7	sp	Q9UKZ9	PCOC2_HUMAN
362	6.62	6.62	43.62	43.09	21.81	tr|Q5JR95|Q5JR95_HUMAN	40S ribosomal protein S8 OS=Homo sapiens GN=RPS8 PE=1 SV=1	HUMAN	3	tr	Q5JR95	Q5JR95_HUMAN
363	6.61	6.61	23.84	15.16	14.05	sp|Q96MK3|FA20A_HUMAN	Protein FAM20A OS=Homo sapiens GN=FAM20A PE=1 SV=4	HUMAN	4	sp	Q96MK3	FA20A_HUMAN
364	6.58	6.66	13.77	7.128	4.706	sp|Q6YHK3|CD109_HUMAN	CD109 antigen OS=Homo sapiens GN=CD109 PE=1 SV=2	HUMAN	4	sp	Q6YHK3	CD109_HUMAN
365	6.57	7.04	15.27	5.492	2.836	sp|P46940|IQGA1_HUMAN	Ras GTPase-activating-like protein IQGAP1 OS=Homo sapiens GN=IQGAP1 PE=1 SV=1	HUMAN	3	sp	P46940	IQGA1_HUMAN
366	6.55	6.55	39.16	39.16	33.92	tr|H7BY58|H7BY58_HUMAN	Protein-L-isoaspartate O-methyltransferase OS=Homo sapiens GN=PCMT1 PE=1 SV=1	HUMAN	5	tr	H7BY58	H7BY58_HUMAN
367	6.53	6.53	21.4	19.6	9.6	sp|Q16647|PTGIS_HUMAN	Prostacyclin synthase OS=Homo sapiens GN=PTGIS PE=1 SV=1	HUMAN	4	sp	Q16647	PTGIS_HUMAN
368	6.51	6.59	18.95	8.543	7.119	tr|A0A087X253|A0A087X253_HUMAN	AP complex subunit beta OS=Homo sapiens GN=AP2B1 PE=1 SV=1	HUMAN	4	tr	A0A087X253	A0A087X253_HUMAN
369	6.51	6.51	18.93	18.93	18.93	sp|Q96CG8|CTHR1_HUMAN	Collagen triple helix repeat-containing protein 1 OS=Homo sapiens GN=CTHRC1 PE=1 SV=1	HUMAN	8	sp	Q96CG8	CTHR1_HUMAN
370	6.5	6.5	41.3	22.18	12.29	sp|P15880|RS2_HUMAN	40S ribosomal protein S2 OS=Homo sapiens GN=RPS2 PE=1 SV=2	HUMAN	3	sp	P15880	RS2_HUMAN
371	6.47	7.13	30.37	11.3	9.259	tr|H3BP20|H3BP20_HUMAN	Beta-hexosaminidase OS=Homo sapiens GN=HEXA PE=1 SV=1	HUMAN	4	tr	H3BP20	H3BP20_HUMAN
372	6.44	6.44	17.23	6.563	4.74	sp|O00410|IPO5_HUMAN	Importin-5 OS=Homo sapiens GN=IPO5 PE=1 SV=4	HUMAN	4	sp	O00410	IPO5_HUMAN
373	6.42	6.42	27.52	18.81	18.81	sp|P10301|RRAS_HUMAN	Ras-related protein R-Ras OS=Homo sapiens GN=RRAS PE=1 SV=1	HUMAN	4	sp	P10301	RRAS_HUMAN
374	6.36	6.36	38.43	20.9	20.9	sp|Q15691|MARE1_HUMAN	Microtubule-associated protein RP/EB family member 1 OS=Homo sapiens GN=MAPRE1 PE=1 SV=3	HUMAN	5	sp	Q15691	MARE1_HUMAN
375	6.28	6.28	41.67	25.93	20.83	sp|P51148|RAB5C_HUMAN	Ras-related protein Rab-5C OS=Homo sapiens GN=RAB5C PE=1 SV=2	HUMAN	3	sp	P51148	RAB5C_HUMAN
376	6.27	6.28	41.67	28.95	21.49	sp|Q9HB71|CYBP_HUMAN	Calcyclin-binding protein OS=Homo sapiens GN=CACYBP PE=1 SV=2	HUMAN	3	sp	Q9HB71	CYBP_HUMAN
377	6.27	6.27	36.41	34.47	29.61	sp|P30043|BLVRB_HUMAN	Flavin reductase (NADPH) OS=Homo sapiens GN=BLVRB PE=1 SV=3	HUMAN	5	sp	P30043	BLVRB_HUMAN
378	6.26	6.27	57.73	49.48	31.96	sp|P60903|S10AA_HUMAN	Protein S100-A10 OS=Homo sapiens GN=S100A10 PE=1 SV=2	HUMAN	7	sp	P60903	S10AA_HUMAN
379	6.22	6.23	30.65	13.98	9.962	sp|P00390|GSHR_HUMAN	Glutathione reductase, mitochondrial OS=Homo sapiens GN=GSR PE=1 SV=2	HUMAN	3	sp	P00390	GSHR_HUMAN
380	6.22	6.22	32.18	17.49	8.416	sp|O75083|WDR1_HUMAN	WD repeat-containing protein 1 OS=Homo sapiens GN=WDR1 PE=1 SV=4	HUMAN	3	sp	O75083	WDR1_HUMAN
381	6.22	6.22	21.81	20.21	20.21	tr|G5E9Q6|G5E9Q6_HUMAN	Profilin OS=Homo sapiens GN=PFN2 PE=1 SV=1	HUMAN	4	tr	G5E9Q6	G5E9Q6_HUMAN
382	6.21	6.21	67.81	34.25	23.97	sp|P62249|RS16_HUMAN	40S ribosomal protein S16 OS=Homo sapiens GN=RPS16 PE=1 SV=2	HUMAN	4	sp	P62249	RS16_HUMAN
383	6.19	6.19	39.93	22.92	19.1	sp|P09601|HMOX1_HUMAN	Heme oxygenase 1 OS=Homo sapiens GN=HMOX1 PE=1 SV=1	HUMAN	4	sp	P09601	HMOX1_HUMAN
384	6.17	6.17	60.19	35.19	35.19	sp|O75347|TBCA_HUMAN	Tubulin-specific chaperone A OS=Homo sapiens GN=TBCA PE=1 SV=3	HUMAN	5	sp	O75347	TBCA_HUMAN
385	6.14	6.14	54.04	36.49	28.42	sp|O95865|DDAH2_HUMAN	N(G),N(G)-dimethylarginine dimethylaminohydrolase 2 OS=Homo sapiens GN=DDAH2 PE=1 SV=1	HUMAN	5	sp	O95865	DDAH2_HUMAN
386	6.13	6.13	15.36	4.065	3.062	sp|Q4ZHG4|FNDC1_HUMAN	Fibronectin type III domain-containing protein 1 OS=Homo sapiens GN=FNDC1 PE=1 SV=4	HUMAN	3	sp	Q4ZHG4	FNDC1_HUMAN
387	6.12	6.12	23.33	5.993	4.359	tr|J3QSU6|J3QSU6_HUMAN	Tenascin OS=Homo sapiens GN=TNC PE=1 SV=1	HUMAN	6	tr	J3QSU6	J3QSU6_HUMAN
388	6.1	6.1	9.422	6.658	5.528	sp|Q96QK1|VPS35_HUMAN	Vacuolar protein sorting-associated protein 35 OS=Homo sapiens GN=VPS35 PE=1 SV=2	HUMAN	3	sp	Q96QK1	VPS35_HUMAN
389	6.07	6.07	27	18.25	18.25	tr|C9J9K3|C9J9K3_HUMAN	40S ribosomal protein SA (Fragment) OS=Homo sapiens GN=RPSA PE=1 SV=4	HUMAN	3	tr	C9J9K3	C9J9K3_HUMAN
390	6.04	6.05	15.51	4.86	4.86	sp|Q9UHI8|ATS1_HUMAN	A disintegrin and metalloproteinase with thrombospondin motifs 1 OS=Homo sapiens GN=ADAMTS1 PE=1 SV=4	HUMAN	3	sp	Q9UHI8	ATS1_HUMAN
391	6.04	6.04	33.52	17.04	14.8	tr|C9JP16|C9JP16_HUMAN	Cartilage-associated protein OS=Homo sapiens GN=CRTAP PE=1 SV=1	HUMAN	5	tr	C9JP16	C9JP16_HUMAN
392	6.02	6.02	12.52	6.595	6.595	sp|P54802|ANAG_HUMAN	Alpha-N-acetylglucosaminidase OS=Homo sapiens GN=NAGLU PE=1 SV=2	HUMAN	3	sp	P54802	ANAG_HUMAN
393	6.01	6.01	31.66	12.76	12.76	sp|Q07960|RHG01_HUMAN	Rho GTPase-activating protein 1 OS=Homo sapiens GN=ARHGAP1 PE=1 SV=1	HUMAN	3	sp	Q07960	RHG01_HUMAN
394	6.01	6.01	42.71	26.56	26.56	tr|H0YGR4|H0YGR4_HUMAN	Oligoribonuclease, mitochondrial (Fragment) OS=Homo sapiens GN=REXO2 PE=1 SV=1	HUMAN	3	tr	H0YGR4	H0YGR4_HUMAN
395	6.01	6.01	23.87	13.17	13.17	sp|Q9BXJ0|C1QT5_HUMAN	Complement C1q tumor necrosis factor-related protein 5 OS=Homo sapiens GN=C1QTNF5 PE=1 SV=1	HUMAN	3	sp	Q9BXJ0	C1QT5_HUMAN
396	6.01	6.01	12.86	11.55	11.55	sp|P12277|KCRB_HUMAN	Creatine kinase B-type OS=Homo sapiens GN=CKB PE=1 SV=1	HUMAN	4	sp	P12277	KCRB_HUMAN
397	6	6.53	10.01	9.013	9.013	sp|P48740|MASP1_HUMAN	Mannan-binding lectin serine protease 1 OS=Homo sapiens GN=MASP1 PE=1 SV=3	HUMAN	4	sp	P48740	MASP1_HUMAN
398	5.97	5.97	15.1	5.642	5.642	sp|P27816|MAP4_HUMAN	Microtubule-associated protein 4 OS=Homo sapiens GN=MAP4 PE=1 SV=3	HUMAN	3	sp	P27816	MAP4_HUMAN
399	5.95	5.95	27.93	25.52	17.93	sp|P30084|ECHM_HUMAN	Enoyl-CoA hydratase, mitochondrial OS=Homo sapiens GN=ECHS1 PE=1 SV=4	HUMAN	4	sp	P30084	ECHM_HUMAN
400	5.93	5.93	41.58	24.75	24.75	tr|B4DLR8|B4DLR8_HUMAN	NAD(P)H dehydrogenase [quinone] 1 OS=Homo sapiens GN=NQO1 PE=1 SV=1	HUMAN	4	tr	B4DLR8	B4DLR8_HUMAN
401	5.9	5.9	21.27	5.603	4.368	sp|Q9BXX0|EMIL2_HUMAN	EMILIN-2 OS=Homo sapiens GN=EMILIN2 PE=1 SV=3	HUMAN	3	sp	Q9BXX0	EMIL2_HUMAN
402	5.88	5.88	42.13	21.32	19.29	tr|A0A0B4J2A4|A0A0B4J2A4_HUMAN	3-ketoacyl-CoA thiolase, mitochondrial OS=Homo sapiens GN=ACAA2 PE=4 SV=1	HUMAN	4	tr	A0A0B4J2A4	A0A0B4J2A4_HUMAN
403	5.8	5.8	43.17	27.75	27.75	sp|P80723|BASP1_HUMAN	Brain acid soluble protein 1 OS=Homo sapiens GN=BASP1 PE=1 SV=2	HUMAN	3	sp	P80723	BASP1_HUMAN
404	5.79	5.79	32.24	8.83	6.982	sp|Q9UNW1|MINP1_HUMAN	Multiple inositol polyphosphate phosphatase 1 OS=Homo sapiens GN=MINPP1 PE=1 SV=1	HUMAN	3	sp	Q9UNW1	MINP1_HUMAN
405	5.78	5.81	30	19.02	12.75	sp|P07954|FUMH_HUMAN	Fumarate hydratase, mitochondrial OS=Homo sapiens GN=FH PE=1 SV=3	HUMAN	4	sp	P07954	FUMH_HUMAN
406	5.69	5.69	26.65	11.78	10.12	sp|Q9UBX1|CATF_HUMAN	Cathepsin F OS=Homo sapiens GN=CTSF PE=1 SV=1	HUMAN	4	sp	Q9UBX1	CATF_HUMAN
407	5.65	5.7	14.36	1.657	1.442	sp|Q14204|DYHC1_HUMAN	Cytoplasmic dynein 1 heavy chain 1 OS=Homo sapiens GN=DYNC1H1 PE=1 SV=5	HUMAN	5	sp	Q14204	DYHC1_HUMAN
408	5.65	5.65	47.43	22.96	17.82	tr|M0QXB4|M0QXB4_HUMAN	Coatomer protein complex, subunit epsilon, isoform CRA_g OS=Homo sapiens GN=COPE PE=1 SV=1	HUMAN	3	tr	M0QXB4	M0QXB4_HUMAN
409	5.59	5.59	30.58	18.38	9.45	sp|P50281|MMP14_HUMAN	Matrix metalloproteinase-14 OS=Homo sapiens GN=MMP14 PE=1 SV=3	HUMAN	5	sp	P50281	MMP14_HUMAN
410	5.58	5.58	32.22	25.53	15.81	sp|P43235|CATK_HUMAN	Cathepsin K OS=Homo sapiens GN=CTSK PE=1 SV=1	HUMAN	5	sp	P43235	CATK_HUMAN
411	5.58	5.58	44.58	35	26.25	sp|Q96C19|EFHD2_HUMAN	EF-hand domain-containing protein D2 OS=Homo sapiens GN=EFHD2 PE=1 SV=1	HUMAN	4	sp	Q96C19	EFHD2_HUMAN
412	5.55	7.66	46.39	41.58	34.71	sp|P17936|IBP3_HUMAN	Insulin-like growth factor-binding protein 3 OS=Homo sapiens GN=IGFBP3 PE=1 SV=2	HUMAN	12	sp	P17936	IBP3_HUMAN
413	5.54	5.54	76.52	50.43	50.43	sp|P05387|RLA2_HUMAN	60S acidic ribosomal protein P2 OS=Homo sapiens GN=RPLP2 PE=1 SV=1	HUMAN	3	sp	P05387	RLA2_HUMAN
414	5.53	12.98	59.51	42.91	29.55	sp|P61981|1433G_HUMAN	14-3-3 protein gamma OS=Homo sapiens GN=YWHAG PE=1 SV=2	HUMAN	9	sp	P61981	1433G_HUMAN
415	5.49	5.58	14.02	5.925	5.202	sp|Q8NBP7|PCSK9_HUMAN	Proprotein convertase subtilisin/kexin type 9 OS=Homo sapiens GN=PCSK9 PE=1 SV=3	HUMAN	3	sp	Q8NBP7	PCSK9_HUMAN
416	5.48	5.48	22.03	20.28	20.28	sp|P52907|CAZA1_HUMAN	F-actin-capping protein subunit alpha-1 OS=Homo sapiens GN=CAPZA1 PE=1 SV=3	HUMAN	4	sp	P52907	CAZA1_HUMAN
417	5.45	5.45	21.1	3.407	3.407	sp|Q7KZF4|SND1_HUMAN	Staphylococcal nuclease domain-containing protein 1 OS=Homo sapiens GN=SND1 PE=1 SV=1	HUMAN	3	sp	Q7KZF4	SND1_HUMAN
418	5.45	5.45	40.68	40.68	35.59	sp|P58546|MTPN_HUMAN	Myotrophin OS=Homo sapiens GN=MTPN PE=1 SV=2	HUMAN	5	sp	P58546	MTPN_HUMAN
419	5.42	11.83	37.8	14.07	12.37	sp|P13647|K2C5_HUMAN	Keratin, type II cytoskeletal 5 OS=Homo sapiens GN=KRT5 PE=1 SV=3	HUMAN	8	sp	P13647	K2C5_HUMAN
420	5.42	7.11	8.042	3.846	3.846	sp|Q16706|MA2A1_HUMAN	Alpha-mannosidase 2 OS=Homo sapiens GN=MAN2A1 PE=1 SV=2	HUMAN	4	sp	Q16706	MA2A1_HUMAN
421	5.41	5.42	36.4	20.96	18.01	sp|P24593|IBP5_HUMAN	Insulin-like growth factor-binding protein 5 OS=Homo sapiens GN=IGFBP5 PE=1 SV=1	HUMAN	5	sp	P24593	IBP5_HUMAN
422	5.41	5.41	33.23	13.95	8.902	sp|P37837|TALDO_HUMAN	Transaldolase OS=Homo sapiens GN=TALDO1 PE=1 SV=2	HUMAN	3	sp	P37837	TALDO_HUMAN
423	5.4	5.4	40.11	29.41	17.11	tr|C9JBI3|C9JBI3_HUMAN	Phosphoserine phosphatase (Fragment) OS=Homo sapiens GN=PSPH PE=1 SV=1	HUMAN	3	tr	C9JBI3	C9JBI3_HUMAN
424	5.39	26.66	49.57	22.64	22.64	sp|P35241|RADI_HUMAN	Radixin OS=Homo sapiens GN=RDX PE=1 SV=1	HUMAN	14	sp	P35241	RADI_HUMAN
425	5.24	5.24	20.98	10.16	10.16	sp|Q14232|EI2BA_HUMAN	Translation initiation factor eIF-2B subunit alpha OS=Homo sapiens GN=EIF2B1 PE=1 SV=1	HUMAN	3	sp	Q14232	EI2BA_HUMAN
426	5.24	5.24	28.96	26.78	26.78	sp|Q13185|CBX3_HUMAN	Chromobox protein homolog 3 OS=Homo sapiens GN=CBX3 PE=1 SV=4	HUMAN	3	sp	Q13185	CBX3_HUMAN
427	5.2	5.42	20.2	13.3	11.08	sp|P62195|PRS8_HUMAN	26S protease regulatory subunit 8 OS=Homo sapiens GN=PSMC5 PE=1 SV=1	HUMAN	3	sp	P62195	PRS8_HUMAN
428	5.16	5.16	36.99	18.08	12.88	sp|P10316|1A69_HUMAN	HLA class I histocompatibility antigen, A-69 alpha chain OS=Homo sapiens GN=HLA-A PE=1 SV=2	HUMAN	3	sp	P10316	1A69_HUMAN
429	5.12	5.12	42.86	31.29	29.93	sp|P68871|HBB_HUMAN	Hemoglobin subunit beta OS=Homo sapiens GN=HBB PE=1 SV=2	HUMAN	13	sp	P68871	HBB_HUMAN
430	5.1	5.1	27.03	27.03	27.03	sp|O60869|EDF1_HUMAN	Endothelial differentiation-related factor 1 OS=Homo sapiens GN=EDF1 PE=1 SV=1	HUMAN	3	sp	O60869	EDF1_HUMAN
431	5.09	5.2	14.03	14.03	12.21	tr|H0YIV4|H0YIV4_HUMAN	Nucleosome assembly protein 1-like 1 (Fragment) OS=Homo sapiens GN=NAP1L1 PE=1 SV=1	HUMAN	3	tr	H0YIV4	H0YIV4_HUMAN
432	5.08	196.13	90.3	90.03	85.22	tr|H0Y7Z1|H0Y7Z1_HUMAN	Fibronectin (Fragment) OS=Homo sapiens GN=FN1 PE=1 SV=1	HUMAN	363	tr	H0Y7Z1	H0Y7Z1_HUMAN
433	5.05	5.05	37.47	21.05	14.11	sp|Q01518|CAP1_HUMAN	Adenylyl cyclase-associated protein 1 OS=Homo sapiens GN=CAP1 PE=1 SV=5	HUMAN	4	sp	Q01518	CAP1_HUMAN
434	5.03	5.03	22.5	19	16.5	sp|P61026|RAB10_HUMAN	Ras-related protein Rab-10 OS=Homo sapiens GN=RAB10 PE=1 SV=1	HUMAN	3	sp	P61026	RAB10_HUMAN
435	5.01	5.04	30.15	24.63	16.91	sp|P35232|PHB_HUMAN	Prohibitin OS=Homo sapiens GN=PHB PE=1 SV=1	HUMAN	3	sp	P35232	PHB_HUMAN
436	4.99	4.99	50.28	33.33	23.16	tr|J3QRS3|J3QRS3_HUMAN	Myosin regulatory light chain 12A OS=Homo sapiens GN=MYL12A PE=1 SV=1	HUMAN	4	tr	J3QRS3	J3QRS3_HUMAN
437	4.94	4.94	47.1	25.87	14.29	sp|Q9Y680|FKBP7_HUMAN	Peptidyl-prolyl cis-trans isomerase FKBP7 OS=Homo sapiens GN=FKBP7 PE=1 SV=1	HUMAN	4	sp	Q9Y680	FKBP7_HUMAN
438	4.91	4.91	40.69	14.6	9.307	sp|P50990|TCPQ_HUMAN	T-complex protein 1 subunit theta OS=Homo sapiens GN=CCT8 PE=1 SV=4	HUMAN	4	sp	P50990	TCPQ_HUMAN
439	4.9	6.06	28.23	13.98	12.63	sp|O15143|ARC1B_HUMAN	Actin-related protein 2/3 complex subunit 1B OS=Homo sapiens GN=ARPC1B PE=1 SV=3	HUMAN	4	sp	O15143	ARC1B_HUMAN
440	4.89	4.9	53.09	27.84	18.56	sp|P46781|RS9_HUMAN	40S ribosomal protein S9 OS=Homo sapiens GN=RPS9 PE=1 SV=3	HUMAN	4	sp	P46781	RS9_HUMAN
441	4.8	4.8	26.46	21.08	16.59	tr|E9PGT1|E9PGT1_HUMAN	Translin OS=Homo sapiens GN=TSN PE=1 SV=1	HUMAN	3	tr	E9PGT1	E9PGT1_HUMAN
442	4.78	6.22	14.08	2.611	1.752	tr|A0A087WYV8|A0A087WYV8_HUMAN	Fibrillin-2 OS=Homo sapiens GN=FBN2 PE=1 SV=1	HUMAN	4	tr	A0A087WYV8	A0A087WYV8_HUMAN
443	4.73	4.73	16.98	7.219	5.749	sp|O14672|ADA10_HUMAN	Disintegrin and metalloproteinase domain-containing protein 10 OS=Homo sapiens GN=ADAM10 PE=1 SV=1	HUMAN	3	sp	O14672	ADA10_HUMAN
444	4.72	5.26	29	19.8	5.8	tr|B4DUR8|B4DUR8_HUMAN	T-complex protein 1 subunit gamma OS=Homo sapiens GN=CCT3 PE=1 SV=1	HUMAN	2	tr	B4DUR8	B4DUR8_HUMAN
445	4.7	4.7	16.72	16.72	16.72	sp|Q9UJJ9|GNPTG_HUMAN	N-acetylglucosamine-1-phosphotransferase subunit gamma OS=Homo sapiens GN=GNPTG PE=1 SV=1	HUMAN	4	sp	Q9UJJ9	GNPTG_HUMAN
446	4.68	4.68	32.21	20.81	9.396	sp|P12236|ADT3_HUMAN	ADP/ATP translocase 3 OS=Homo sapiens GN=SLC25A6 PE=1 SV=4	HUMAN	3	sp	P12236	ADT3_HUMAN
447	4.68	4.68	27.71	7.78	4.862	sp|P38606|VATA_HUMAN	V-type proton ATPase catalytic subunit A OS=Homo sapiens GN=ATP6V1A PE=1 SV=2	HUMAN	2	sp	P38606	VATA_HUMAN
448	4.66	4.66	26.94	26.94	21.22	sp|P56537|IF6_HUMAN	Eukaryotic translation initiation factor 6 OS=Homo sapiens GN=EIF6 PE=1 SV=1	HUMAN	3	sp	P56537	IF6_HUMAN
449	4.62	4.62	22.9	13.32	13.32	tr|M0R1G9|M0R1G9_HUMAN	Pregnancy-specific beta-1-glycoprotein 5 OS=Homo sapiens GN=PSG5 PE=1 SV=1	HUMAN	5	tr	M0R1G9	M0R1G9_HUMAN
450	4.61	4.61	38.33	28.19	24.67	sp|O43809|CPSF5_HUMAN	Cleavage and polyadenylation specificity factor subunit 5 OS=Homo sapiens GN=NUDT21 PE=1 SV=1	HUMAN	4	sp	O43809	CPSF5_HUMAN
451	4.61	4.61	22.73	12.88	12.88	sp|P40261|NNMT_HUMAN	Nicotinamide N-methyltransferase OS=Homo sapiens GN=NNMT PE=1 SV=1	HUMAN	3	sp	P40261	NNMT_HUMAN
452	4.6	4.6	43.71	28.48	8.609	sp|P62277|RS13_HUMAN	40S ribosomal protein S13 OS=Homo sapiens GN=RPS13 PE=1 SV=2	HUMAN	2	sp	P62277	RS13_HUMAN
453	4.57	4.57	43.1	18.41	18.41	sp|Q9UL46|PSME2_HUMAN	Proteasome activator complex subunit 2 OS=Homo sapiens GN=PSME2 PE=1 SV=4	HUMAN	3	sp	Q9UL46	PSME2_HUMAN
454	4.5	4.5	15.63	15.63	15.63	sp|P27105|STOM_HUMAN	Erythrocyte band 7 integral membrane protein OS=Homo sapiens GN=STOM PE=1 SV=3	HUMAN	4	sp	P27105	STOM_HUMAN
455	4.48	4.48	37.88	16.97	11.52	tr|A0A087WZH7|A0A087WZH7_HUMAN	Myristoylated alanine-rich C-kinase substrate OS=Homo sapiens GN=MARCKS PE=1 SV=1	HUMAN	2	tr	A0A087WZH7	A0A087WZH7_HUMAN
456	4.48	4.48	26.69	21.8	18.05	sp|O94907|DKK1_HUMAN	Dickkopf-related protein 1 OS=Homo sapiens GN=DKK1 PE=1 SV=1	HUMAN	3	sp	O94907	DKK1_HUMAN
457	4.46	4.46	38.43	17.62	8.917	sp|Q15233|NONO_HUMAN	Non-POU domain-containing octamer-binding protein OS=Homo sapiens GN=NONO PE=1 SV=4	HUMAN	3	sp	Q15233	NONO_HUMAN
458	4.45	4.45	20.81	4.377	4.377	sp|O95450|ATS2_HUMAN	A disintegrin and metalloproteinase with thrombospondin motifs 2 OS=Homo sapiens GN=ADAMTS2 PE=2 SV=2	HUMAN	3	sp	O95450	ATS2_HUMAN
459	4.44	4.44	19.81	9.662	7.005	sp|Q12765|SCRN1_HUMAN	Secernin-1 OS=Homo sapiens GN=SCRN1 PE=1 SV=2	HUMAN	3	sp	Q12765	SCRN1_HUMAN
460	4.43	4.43	28.88	18.77	15.52	sp|Q15404|RSU1_HUMAN	Ras suppressor protein 1 OS=Homo sapiens GN=RSU1 PE=1 SV=3	HUMAN	4	sp	Q15404	RSU1_HUMAN
461	4.41	4.41	29.44	16.82	16.82	sp|P30044|PRDX5_HUMAN	Peroxiredoxin-5, mitochondrial OS=Homo sapiens GN=PRDX5 PE=1 SV=4	HUMAN	3	sp	P30044	PRDX5_HUMAN
462	4.39	4.39	32.58	17.42	13.48	sp|O15145|ARPC3_HUMAN	Actin-related protein 2/3 complex subunit 3 OS=Homo sapiens GN=ARPC3 PE=1 SV=3	HUMAN	3	sp	O15145	ARPC3_HUMAN
463	4.39	4.39	21.2	13.59	13.59	sp|P61224|RAP1B_HUMAN	Ras-related protein Rap-1b OS=Homo sapiens GN=RAP1B PE=1 SV=1	HUMAN	3	sp	P61224	RAP1B_HUMAN
464	4.38	4.39	42.14	17.86	16.43	tr|D6R9P3|D6R9P3_HUMAN	Heterogeneous nuclear ribonucleoprotein A/B OS=Homo sapiens GN=HNRNPAB PE=1 SV=1	HUMAN	4	tr	D6R9P3	D6R9P3_HUMAN
465	4.38	4.38	58.39	38.26	24.16	sp|P16949|STMN1_HUMAN	Stathmin OS=Homo sapiens GN=STMN1 PE=1 SV=3	HUMAN	3	sp	P16949	STMN1_HUMAN
466	4.36	4.36	33.49	14.42	11.63	sp|P50914|RL14_HUMAN	60S ribosomal protein L14 OS=Homo sapiens GN=RPL14 PE=1 SV=4	HUMAN	2	sp	P50914	RL14_HUMAN
467	4.33	4.34	65.35	45.54	36.63	sp|P26447|S10A4_HUMAN	Protein S100-A4 OS=Homo sapiens GN=S100A4 PE=1 SV=1	HUMAN	5	sp	P26447	S10A4_HUMAN
468	4.32	4.33	19.07	3.854	2.028	sp|P13497|BMP1_HUMAN	Bone morphogenetic protein 1 OS=Homo sapiens GN=BMP1 PE=1 SV=2	HUMAN	2	sp	P13497	BMP1_HUMAN
469	4.32	4.33	30.86	15.74	12.96	tr|A0A0A0MT30|A0A0A0MT30_HUMAN	Aldo-keto reductase family 1 member C1 OS=Homo sapiens GN=AKR1C1 PE=1 SV=1	HUMAN	4	tr	A0A0A0MT30	A0A0A0MT30_HUMAN
470	4.32	4.33	24.42	15.67	15.67	sp|P62993|GRB2_HUMAN	Growth factor receptor-bound protein 2 OS=Homo sapiens GN=GRB2 PE=1 SV=1	HUMAN	3	sp	P62993	GRB2_HUMAN
471	4.32	4.32	52.21	23.53	12.5	sp|P61353|RL27_HUMAN	60S ribosomal protein L27 OS=Homo sapiens GN=RPL27 PE=1 SV=2	HUMAN	2	sp	P61353	RL27_HUMAN
472	4.3	4.58	18.38	9.259	8.547	sp|Q04446|GLGB_HUMAN	1,4-alpha-glucan-branching enzyme OS=Homo sapiens GN=GBE1 PE=1 SV=3	HUMAN	3	sp	Q04446	GLGB_HUMAN
473	4.29	4.73	25.27	22.74	10.83	sp|Q99436|PSB7_HUMAN	Proteasome subunit beta type-7 OS=Homo sapiens GN=PSMB7 PE=1 SV=1	HUMAN	3	sp	Q99436	PSB7_HUMAN
474	4.29	4.3	24.4	7.518	2.979	tr|A0A0A0MRV0|A0A0A0MRV0_HUMAN	Ribosome-binding protein 1 OS=Homo sapiens GN=RRBP1 PE=1 SV=1	HUMAN	3	tr	A0A0A0MRV0	A0A0A0MRV0_HUMAN
475	4.29	4.29	23.72	15.02	8.3	tr|D6RHI9|D6RHI9_HUMAN	Ribonuclease T2 (Fragment) OS=Homo sapiens GN=RNASET2 PE=1 SV=4	HUMAN	2	tr	D6RHI9	D6RHI9_HUMAN
476	4.27	4.27	12.32	3.833	2.806	sp|Q92859|NEO1_HUMAN	Neogenin OS=Homo sapiens GN=NEO1 PE=1 SV=2	HUMAN	2	sp	Q92859	NEO1_HUMAN
477	4.26	24.44	88.1	78.57	77.78	sp|P23527|H2B1O_HUMAN	Histone H2B type 1-O OS=Homo sapiens GN=HIST1H2BO PE=1 SV=3	HUMAN	20	sp	P23527	H2B1O_HUMAN
478	4.25	4.25	29.3	16.51	13.95	sp|P00505|AATM_HUMAN	Aspartate aminotransferase, mitochondrial OS=Homo sapiens GN=GOT2 PE=1 SV=3	HUMAN	4	sp	P00505	AATM_HUMAN
479	4.23	4.24	44.18	11.11	8.466	sp|P51991|ROA3_HUMAN	Heterogeneous nuclear ribonucleoprotein A3 OS=Homo sapiens GN=HNRNPA3 PE=1 SV=2	HUMAN	3	sp	P51991	ROA3_HUMAN
480	4.23	4.23	23.71	16.72	13.37	sp|Q08257|QOR_HUMAN	Quinone oxidoreductase OS=Homo sapiens GN=CRYZ PE=1 SV=1	HUMAN	2	sp	Q08257	QOR_HUMAN
481	4.22	4.22	33.99	23.65	14.78	sp|P40429|RL13A_HUMAN	60S ribosomal protein L13a OS=Homo sapiens GN=RPL13A PE=1 SV=2	HUMAN	3	sp	P40429	RL13A_HUMAN
482	4.22	4.22	57.69	19.23	19.23	sp|Q15121|PEA15_HUMAN	Astrocytic phosphoprotein PEA-15 OS=Homo sapiens GN=PEA15 PE=1 SV=2	HUMAN	3	sp	Q15121	PEA15_HUMAN
483	4.2	4.2	34.34	21.21	16.84	sp|P46777|RL5_HUMAN	60S ribosomal protein L5 OS=Homo sapiens GN=RPL5 PE=1 SV=3	HUMAN	5	sp	P46777	RL5_HUMAN
484	4.19	4.27	22.08	20.13	20.13	sp|Q9UHV9|PFD2_HUMAN	Prefoldin subunit 2 OS=Homo sapiens GN=PFDN2 PE=1 SV=1	HUMAN	3	sp	Q9UHV9	PFD2_HUMAN
485	4.18	4.18	43.05	17.88	17.88	sp|P62263|RS14_HUMAN	40S ribosomal protein S14 OS=Homo sapiens GN=RPS14 PE=1 SV=3	HUMAN	3	sp	P62263	RS14_HUMAN
486	4.16	4.16	14.28	5.016	2.251	sp|Q9NYU2|UGGG1_HUMAN	UDP-glucose:glycoprotein glucosyltransferase 1 OS=Homo sapiens GN=UGGT1 PE=1 SV=3	HUMAN	2	sp	Q9NYU2	UGGG1_HUMAN
487	4.16	4.16	14.1	10.57	10.57	sp|P00403|COX2_HUMAN	Cytochrome c oxidase subunit 2 OS=Homo sapiens GN=MT-CO2 PE=1 SV=1	HUMAN	3	sp	P00403	COX2_HUMAN
488	4.14	4.14	57.98	44.68	44.68	tr|Q5W0H4|Q5W0H4_HUMAN	Translationally-controlled tumor protein OS=Homo sapiens GN=TPT1 PE=1 SV=1	HUMAN	4	tr	Q5W0H4	Q5W0H4_HUMAN
489	4.14	4.14	23.61	7.639	5.787	sp|P23526|SAHH_HUMAN	Adenosylhomocysteinase OS=Homo sapiens GN=AHCY PE=1 SV=4	HUMAN	2	sp	P23526	SAHH_HUMAN
490	4.13	4.13	9.355	3.951	3.312	sp|Q14766|LTBP1_HUMAN	Latent-transforming growth factor beta-binding protein 1 OS=Homo sapiens GN=LTBP1 PE=1 SV=4	HUMAN	3	sp	Q14766	LTBP1_HUMAN
491	4.12	4.13	33.23	17.08	15.22	sp|Q00577|PURA_HUMAN	Transcriptional activator protein Pur-alpha OS=Homo sapiens GN=PURA PE=1 SV=2	HUMAN	2	sp	Q00577	PURA_HUMAN
492	4.12	4.12	20.29	13.69	11.74	sp|P54727|RD23B_HUMAN	UV excision repair protein RAD23 homolog B OS=Homo sapiens GN=RAD23B PE=1 SV=1	HUMAN	2	sp	P54727	RD23B_HUMAN
493	4.11	4.11	37.5	19.53	19.53	sp|P35268|RL22_HUMAN	60S ribosomal protein L22 OS=Homo sapiens GN=RPL22 PE=1 SV=2	HUMAN	2	sp	P35268	RL22_HUMAN
494	4.11	4.11	45.63	44.66	33.01	sp|Q96FQ6|S10AG_HUMAN	Protein S100-A16 OS=Homo sapiens GN=S100A16 PE=1 SV=1	HUMAN	3	sp	Q96FQ6	S10AG_HUMAN
495	4.09	4.09	20.39	5.964	5.132	sp|Q14393|GAS6_HUMAN	Growth arrest-specific protein 6 OS=Homo sapiens GN=GAS6 PE=1 SV=2	HUMAN	2	sp	Q14393	GAS6_HUMAN
496	4.08	4.08	19.93	10.89	9.225	sp|O95394|AGM1_HUMAN	Phosphoacetylglucosamine mutase OS=Homo sapiens GN=PGM3 PE=1 SV=1	HUMAN	2	sp	O95394	AGM1_HUMAN
497	4.06	4.13	9.139	0.8518	0.5501	sp|Q96RW7|HMCN1_HUMAN	Hemicentin-1 OS=Homo sapiens GN=HMCN1 PE=1 SV=2	HUMAN	2	sp	Q96RW7	HMCN1_HUMAN
498	4.06	4.07	26.12	11.24	11.24	sp|Q15365|PCBP1_HUMAN	Poly(rC)-binding protein 1 OS=Homo sapiens GN=PCBP1 PE=1 SV=2	HUMAN	3	sp	Q15365	PCBP1_HUMAN
499	4.05	4.05	17.72	5.34	5.34	sp|P78536|ADA17_HUMAN	Disintegrin and metalloproteinase domain-containing protein 17 OS=Homo sapiens GN=ADAM17 PE=1 SV=1	HUMAN	3	sp	P78536	ADA17_HUMAN
500	4.04	4.07	21.43	8.857	8.857	sp|Q12792|TWF1_HUMAN	Twinfilin-1 OS=Homo sapiens GN=TWF1 PE=1 SV=3	HUMAN	2	sp	Q12792	TWF1_HUMAN
501	4.04	4.04	31.09	15.13	12.61	sp|P60866|RS20_HUMAN	40S ribosomal protein S20 OS=Homo sapiens GN=RPS20 PE=1 SV=1	HUMAN	2	sp	P60866	RS20_HUMAN
502	4.03	4.03	17.77	4.022	4.022	sp|Q14118|DAG1_HUMAN	Dystroglycan OS=Homo sapiens GN=DAG1 PE=1 SV=2	HUMAN	2	sp	Q14118	DAG1_HUMAN
503	4.03	4.03	12.84	5.236	5.236	sp|P27824|CALX_HUMAN	Calnexin OS=Homo sapiens GN=CANX PE=1 SV=2	HUMAN	2	sp	P27824	CALX_HUMAN
504	4.02	4.02	20	2.683	2.683	sp|Q86VP6|CAND1_HUMAN	Cullin-associated NEDD8-dissociated protein 1 OS=Homo sapiens GN=CAND1 PE=1 SV=2	HUMAN	2	sp	Q86VP6	CAND1_HUMAN
505	4.02	4.02	28.6	10.84	10.84	sp|O15460|P4HA2_HUMAN	Prolyl 4-hydroxylase subunit alpha-2 OS=Homo sapiens GN=P4HA2 PE=1 SV=1	HUMAN	3	sp	O15460	P4HA2_HUMAN
506	4.01	4.56	31.95	9.756	9.756	sp|P43034|LIS1_HUMAN	Platelet-activating factor acetylhydrolase IB subunit alpha OS=Homo sapiens GN=PAFAH1B1 PE=1 SV=2	HUMAN	3	sp	P43034	LIS1_HUMAN
507	4.01	4.06	14.4	2.464	2.464	tr|X6R3P0|X6R3P0_HUMAN	Slit homolog 2 protein OS=Homo sapiens GN=SLIT2 PE=1 SV=1	HUMAN	2	tr	X6R3P0	X6R3P0_HUMAN
508	4.01	4.01	14.44	8.664	8.664	sp|P09603|CSF1_HUMAN	Macrophage colony-stimulating factor 1 OS=Homo sapiens GN=CSF1 PE=1 SV=2	HUMAN	3	sp	P09603	CSF1_HUMAN
509	4.01	4.01	13.31	6.1	6.1	sp|Q15758|AAAT_HUMAN	Neutral amino acid transporter B(0) OS=Homo sapiens GN=SLC1A5 PE=1 SV=2	HUMAN	2	sp	Q15758	AAAT_HUMAN
510	4	4.02	19.62	9.946	9.946	sp|O75367|H2AY_HUMAN	Core histone macro-H2A.1 OS=Homo sapiens GN=H2AFY PE=1 SV=4	HUMAN	2	sp	O75367	H2AY_HUMAN
511	4	4.01	13.8	4.267	4.267	tr|E7ETU9|E7ETU9_HUMAN	Procollagen-lysine,2-oxoglutarate 5-dioxygenase 2 OS=Homo sapiens GN=PLOD2 PE=1 SV=1	HUMAN	2	tr	E7ETU9	E7ETU9_HUMAN
512	4	4	26.92	6.41	6.41	sp|Q96HE7|ERO1A_HUMAN	ERO1-like protein alpha OS=Homo sapiens GN=ERO1L PE=1 SV=2	HUMAN	2	sp	Q96HE7	ERO1A_HUMAN
513	4	4	21.09	7.94	7.94	tr|A0A087X2I1|A0A087X2I1_HUMAN	26S protease regulatory subunit 10B OS=Homo sapiens GN=PSMC6 PE=1 SV=1	HUMAN	2	tr	A0A087X2I1	A0A087X2I1_HUMAN
514	4	4	17.11	7.629	7.629	sp|P01019|ANGT_HUMAN	Angiotensinogen OS=Homo sapiens GN=AGT PE=1 SV=1	HUMAN	3	sp	P01019	ANGT_HUMAN
515	4	4	10.46	4.12	4.12	tr|J3KPF3|J3KPF3_HUMAN	4F2 cell-surface antigen heavy chain OS=Homo sapiens GN=SLC3A2 PE=1 SV=1	HUMAN	2	tr	J3KPF3	J3KPF3_HUMAN
516	4	4	47.5	47.5	30	tr|I3L3M7|I3L3M7_HUMAN	Thioredoxin domain-containing protein 17 OS=Homo sapiens GN=TXNDC17 PE=1 SV=1	HUMAN	2	tr	I3L3M7	I3L3M7_HUMAN
517	4	4	24.45	12.23	12.23	sp|P68402|PA1B2_HUMAN	Platelet-activating factor acetylhydrolase IB subunit beta OS=Homo sapiens GN=PAFAH1B2 PE=1 SV=1	HUMAN	2	sp	P68402	PA1B2_HUMAN
518	4	4	7.711	4.096	4.096	sp|P05543|THBG_HUMAN	Thyroxine-binding globulin OS=Homo sapiens GN=SERPINA7 PE=1 SV=2	HUMAN	2	sp	P05543	THBG_HUMAN
519	3.99	3.99	51.85	29.63	29.63	sp|P62942|FKB1A_HUMAN	Peptidyl-prolyl cis-trans isomerase FKBP1A OS=Homo sapiens GN=FKBP1A PE=1 SV=2	HUMAN	6	sp	P62942	FKB1A_HUMAN
520	3.98	3.98	26.21	6.25	6.25	sp|P42785|PCP_HUMAN	Lysosomal Pro-X carboxypeptidase OS=Homo sapiens GN=PRCP PE=1 SV=1	HUMAN	2	sp	P42785	PCP_HUMAN
521	3.95	8.15	41.96	28.24	21.96	sp|P62258|1433E_HUMAN	14-3-3 protein epsilon OS=Homo sapiens GN=YWHAE PE=1 SV=1	HUMAN	7	sp	P62258	1433E_HUMAN
522	3.94	3.95	26.33	12.46	12.46	tr|K7ER96|K7ER96_HUMAN	Thioredoxin-like protein 1 (Fragment) OS=Homo sapiens GN=TXNL1 PE=1 SV=1	HUMAN	3	tr	K7ER96	K7ER96_HUMAN
523	3.93	5.64	40.05	19.18	11.75	tr|E7ES33|E7ES33_HUMAN	Septin-7 OS=Homo sapiens GN=SEPT7 PE=1 SV=3	HUMAN	3	tr	E7ES33	E7ES33_HUMAN
524	3.92	3.92	14.88	12.25	6.346	sp|Q9NR12|PDLI7_HUMAN	PDZ and LIM domain protein 7 OS=Homo sapiens GN=PDLIM7 PE=1 SV=1	HUMAN	3	sp	Q9NR12	PDLI7_HUMAN
525	3.91	3.91	54.48	22.07	22.07	sp|P39019|RS19_HUMAN	40S ribosomal protein S19 OS=Homo sapiens GN=RPS19 PE=1 SV=2	HUMAN	3	sp	P39019	RS19_HUMAN
526	3.88	4.37	28.13	24.48	21.88	sp|Q07812|BAX_HUMAN	Apoptosis regulator BAX OS=Homo sapiens GN=BAX PE=1 SV=1	HUMAN	3	sp	Q07812	BAX_HUMAN
527	3.87	4.16	20.15	6.718	6.718	sp|Q04756|HGFA_HUMAN	Hepatocyte growth factor activator OS=Homo sapiens GN=HGFAC PE=1 SV=1	HUMAN	3	sp	Q04756	HGFA_HUMAN
528	3.87	3.87	36.51	20.33	14.94	sp|P78417|GSTO1_HUMAN	Glutathione S-transferase omega-1 OS=Homo sapiens GN=GSTO1 PE=1 SV=2	HUMAN	3	sp	P78417	GSTO1_HUMAN
529	3.87	3.87	34.84	9.059	6.446	sp|P21589|5NTD_HUMAN	5'-nucleotidase OS=Homo sapiens GN=NT5E PE=1 SV=1	HUMAN	3	sp	P21589	5NTD_HUMAN
530	3.87	3.87	28.51	14.05	14.05	tr|G3V5Q1|G3V5Q1_HUMAN	DNA-(apurinic or apyrimidinic site) lyase (Fragment) OS=Homo sapiens GN=APEX1 PE=1 SV=1	HUMAN	4	tr	G3V5Q1	G3V5Q1_HUMAN
531	3.86	3.86	31.88	10.25	8.539	tr|A6NLN1|A6NLN1_HUMAN	Polypyrimidine tract binding protein 1, isoform CRA_b OS=Homo sapiens GN=PTBP1 PE=1 SV=4	HUMAN	3	tr	A6NLN1	A6NLN1_HUMAN
532	3.84	3.84	31.28	27.31	15.86	sp|Q92520|FAM3C_HUMAN	Protein FAM3C OS=Homo sapiens GN=FAM3C PE=1 SV=1	HUMAN	3	sp	Q92520	FAM3C_HUMAN
533	3.82	3.82	46.74	15.71	14.94	sp|Q14847|LASP1_HUMAN	LIM and SH3 domain protein 1 OS=Homo sapiens GN=LASP1 PE=1 SV=2	HUMAN	3	sp	Q14847	LASP1_HUMAN
534	3.81	3.82	37.94	10.5	6.077	sp|Q99832|TCPH_HUMAN	T-complex protein 1 subunit eta OS=Homo sapiens GN=CCT7 PE=1 SV=2	HUMAN	2	sp	Q99832	TCPH_HUMAN
535	3.8	3.8	28.23	14.83	14.83	sp|Q8TEA8|DTD1_HUMAN	D-tyrosyl-tRNA(Tyr) deacylase 1 OS=Homo sapiens GN=DTD1 PE=1 SV=2	HUMAN	2	sp	Q8TEA8	DTD1_HUMAN
536	3.72	3.72	57.71	23.72	11.46	tr|J3KTL2|J3KTL2_HUMAN	Serine/arginine-rich-splicing factor 1 OS=Homo sapiens GN=SRSF1 PE=1 SV=1	HUMAN	3	tr	J3KTL2	J3KTL2_HUMAN
537	3.71	3.71	17.2	17.2	15.05	tr|I3L504|I3L504_HUMAN	Eukaryotic translation initiation factor 5A-1 OS=Homo sapiens GN=EIF5A PE=1 SV=1	HUMAN	5	tr	I3L504	I3L504_HUMAN
538	3.69	3.71	14.73	4.972	2.003	tr|A0A087WTM7|A0A087WTM7_HUMAN	Apolipoprotein B-100 OS=Homo sapiens GN=APOB PE=1 SV=1	HUMAN	9	tr	A0A087WTM7	A0A087WTM7_HUMAN
539	3.68	3.68	34.69	17.01	12.93	sp|Q13404|UB2V1_HUMAN	Ubiquitin-conjugating enzyme E2 variant 1 OS=Homo sapiens GN=UBE2V1 PE=1 SV=2	HUMAN	2	sp	Q13404	UB2V1_HUMAN
540	3.67	3.67	17.62	11.4	11.4	tr|J3QR09|J3QR09_HUMAN	Ribosomal protein L19 OS=Homo sapiens GN=RPL19 PE=1 SV=1	HUMAN	3	tr	J3QR09	J3QR09_HUMAN
541	3.66	3.66	39.87	20.92	20.92	tr|H3BQZ9|H3BQZ9_HUMAN	Adenine phosphoribosyltransferase OS=Homo sapiens GN=APRT PE=1 SV=1	HUMAN	3	tr	H3BQZ9	H3BQZ9_HUMAN
542	3.64	3.64	11.58	4.177	1.432	sp|P01031|CO5_HUMAN	Complement C5 OS=Homo sapiens GN=C5 PE=1 SV=4	HUMAN	2	sp	P01031	CO5_HUMAN
543	3.62	3.62	39.46	34.69	34.69	sp|Q96C90|PP14B_HUMAN	Protein phosphatase 1 regulatory subunit 14B OS=Homo sapiens GN=PPP1R14B PE=1 SV=3	HUMAN	2	sp	Q96C90	PP14B_HUMAN
544	3.6	3.6	25.66	13.82	13.82	sp|P61088|UBE2N_HUMAN	Ubiquitin-conjugating enzyme E2 N OS=Homo sapiens GN=UBE2N PE=1 SV=1	HUMAN	2	sp	P61088	UBE2N_HUMAN
545	3.59	3.59	33.48	17.62	7.489	sp|Q9UIJ7|KAD3_HUMAN	GTP:AMP phosphotransferase AK3, mitochondrial OS=Homo sapiens GN=AK3 PE=1 SV=4	HUMAN	2	sp	Q9UIJ7	KAD3_HUMAN
546	3.57	3.57	46.34	35.37	22.56	sp|P84103|SRSF3_HUMAN	Serine/arginine-rich splicing factor 3 OS=Homo sapiens GN=SRSF3 PE=1 SV=1	HUMAN	3	sp	P84103	SRSF3_HUMAN
547	3.57	3.57	23.51	5.135	5.135	sp|Q9GZP0|PDGFD_HUMAN	Platelet-derived growth factor D OS=Homo sapiens GN=PDGFD PE=1 SV=1	HUMAN	2	sp	Q9GZP0	PDGFD_HUMAN
548	3.56	3.56	26.45	18.9	8.14	sp|Q9UJ70|NAGK_HUMAN	N-acetyl-D-glucosamine kinase OS=Homo sapiens GN=NAGK PE=1 SV=4	HUMAN	2	sp	Q9UJ70	NAGK_HUMAN
549	3.52	3.52	37.65	37.65	37.65	tr|F5GXX5|F5GXX5_HUMAN	Dolichyl-diphosphooligosaccharide--protein glycosyltransferase subunit DAD1 OS=Homo sapiens GN=DAD1 PE=1 SV=1	HUMAN	4	tr	F5GXX5	F5GXX5_HUMAN
550	3.51	9.9	22.71	11.36	7.692	tr|E9PK47|E9PK47_HUMAN	Alpha-1,4 glucan phosphorylase OS=Homo sapiens GN=PYGL PE=1 SV=1	HUMAN	5	tr	E9PK47	E9PK47_HUMAN
551	3.47	3.47	18.95	14.92	14.92	sp|P09496|CLCA_HUMAN	Clathrin light chain A OS=Homo sapiens GN=CLTA PE=1 SV=1	HUMAN	3	sp	P09496	CLCA_HUMAN
552	3.46	3.46	38.64	34.09	30.3	sp|P25398|RS12_HUMAN	40S ribosomal protein S12 OS=Homo sapiens GN=RPS12 PE=1 SV=3	HUMAN	3	sp	P25398	RS12_HUMAN
553	3.44	3.44	13.62	5.217	5.217	sp|P02749|APOH_HUMAN	Beta-2-glycoprotein 1 OS=Homo sapiens GN=APOH PE=1 SV=3	HUMAN	3	sp	P02749	APOH_HUMAN
554	3.42	3.42	20.27	20.27	11.96	sp|P00387|NB5R3_HUMAN	NADH-cytochrome b5 reductase 3 OS=Homo sapiens GN=CYB5R3 PE=1 SV=3	HUMAN	2	sp	P00387	NB5R3_HUMAN
555	3.41	3.41	15.26	4.274	4.274	sp|Q13443|ADAM9_HUMAN	Disintegrin and metalloproteinase domain-containing protein 9 OS=Homo sapiens GN=ADAM9 PE=1 SV=1	HUMAN	2	sp	Q13443	ADAM9_HUMAN
556	3.4	3.4	36.77	16.14	9.865	sp|O15173|PGRC2_HUMAN	Membrane-associated progesterone receptor component 2 OS=Homo sapiens GN=PGRMC2 PE=1 SV=1	HUMAN	2	sp	O15173	PGRC2_HUMAN
557	3.37	7.93	36.32	28.77	21.23	sp|P45877|PPIC_HUMAN	Peptidyl-prolyl cis-trans isomerase C OS=Homo sapiens GN=PPIC PE=1 SV=1	HUMAN	5	sp	P45877	PPIC_HUMAN
558	3.37	3.37	14.83	14.83	10.17	tr|I3L145|I3L145_HUMAN	Sex hormone-binding globulin OS=Homo sapiens GN=SHBG PE=1 SV=1	HUMAN	2	tr	I3L145	I3L145_HUMAN
559	3.36	3.36	16.24	5.983	4.274	tr|D6REA1|D6REA1_HUMAN	Nucleotide exchange factor SIL1 OS=Homo sapiens GN=SIL1 PE=1 SV=1	HUMAN	2	tr	D6REA1	D6REA1_HUMAN
560	3.32	3.75	8.731	3.954	3.13	tr|B0QY89|B0QY89_HUMAN	Eukaryotic translation initiation factor 3 subunit L OS=Homo sapiens GN=EIF3L PE=1 SV=1	HUMAN	2	tr	B0QY89	B0QY89_HUMAN
561	3.31	3.31	14.51	8.443	8.443	tr|A0A087WVM3|A0A087WVM3_HUMAN	Protein CYR61 OS=Homo sapiens GN=CYR61 PE=1 SV=1	HUMAN	3	tr	A0A087WVM3	A0A087WVM3_HUMAN
562	3.3	3.48	37.15	9.415	8.142	sp|Q9BWS9|CHID1_HUMAN	Chitinase domain-containing protein 1 OS=Homo sapiens GN=CHID1 PE=1 SV=1	HUMAN	3	sp	Q9BWS9	CHID1_HUMAN
563	3.29	3.3	17.02	7.839	7.839	tr|F5H6I7|F5H6I7_HUMAN	Atlastin-3 OS=Homo sapiens GN=ATL3 PE=1 SV=1	HUMAN	2	tr	F5H6I7	F5H6I7_HUMAN
564	3.29	3.29	28.93	14.88	10.33	tr|H7C0C1|H7C0C1_HUMAN	Uncharacterized protein (Fragment) OS=Homo sapiens PE=4 SV=2	HUMAN	2	tr	H7C0C1	H7C0C1_HUMAN
565	3.28	3.28	89.8	48.98	48.98	sp|P04080|CYTB_HUMAN	Cystatin-B OS=Homo sapiens GN=CSTB PE=1 SV=2	HUMAN	4	sp	P04080	CYTB_HUMAN
566	3.28	3.28	16.23	8.423	6.432	sp|P35475|IDUA_HUMAN	Alpha-L-iduronidase OS=Homo sapiens GN=IDUA PE=1 SV=2	HUMAN	2	sp	P35475	IDUA_HUMAN
567	3.26	3.26	47.96	19.39	19.39	sp|P30085|KCY_HUMAN	UMP-CMP kinase OS=Homo sapiens GN=CMPK1 PE=1 SV=3	HUMAN	3	sp	P30085	KCY_HUMAN
568	3.23	3.23	41.15	26.56	26.56	tr|H0YFA4|H0YFA4_HUMAN	Cysteine-rich protein 2 (Fragment) OS=Homo sapiens GN=CRIP2 PE=1 SV=1	HUMAN	2	tr	H0YFA4	H0YFA4_HUMAN
569	3.22	3.22	25.57	16.38	14.37	sp|P40121|CAPG_HUMAN	Macrophage-capping protein OS=Homo sapiens GN=CAPG PE=1 SV=2	HUMAN	3	sp	P40121	CAPG_HUMAN
570	3.21	3.21	17.61	9.155	9.155	sp|P26885|FKBP2_HUMAN	Peptidyl-prolyl cis-trans isomerase FKBP2 OS=Homo sapiens GN=FKBP2 PE=1 SV=2	HUMAN	2	sp	P26885	FKBP2_HUMAN
571	3.2	3.21	31.24	11.79	5.894	sp|P12081|SYHC_HUMAN	Histidine--tRNA ligase, cytoplasmic OS=Homo sapiens GN=HARS PE=1 SV=2	HUMAN	2	sp	P12081	SYHC_HUMAN
572	3.18	3.6	35.84	23.19	14.46	sp|Q53FA7|QORX_HUMAN	Quinone oxidoreductase PIG3 OS=Homo sapiens GN=TP53I3 PE=1 SV=2	HUMAN	4	sp	Q53FA7	QORX_HUMAN
573	3.16	3.16	43.92	27.03	19.59	sp|Q96A72|MGN2_HUMAN	Protein mago nashi homolog 2 OS=Homo sapiens GN=MAGOHB PE=1 SV=1	HUMAN	2	sp	Q96A72	MGN2_HUMAN
574	3.12	3.17	23.08	11.37	9.699	sp|Q99623|PHB2_HUMAN	Prohibitin-2 OS=Homo sapiens GN=PHB2 PE=1 SV=2	HUMAN	2	sp	Q99623	PHB2_HUMAN
575	3.12	3.12	19.67	9.426	9.426	tr|H0YCY8|H0YCY8_HUMAN	Dipeptidyl peptidase 1 (Fragment) OS=Homo sapiens GN=CTSC PE=1 SV=4	HUMAN	2	tr	H0YCY8	H0YCY8_HUMAN
576	3.1	6.44	74.1	65.06	41.57	sp|Q9Y281|COF2_HUMAN	Cofilin-2 OS=Homo sapiens GN=CFL2 PE=1 SV=1	HUMAN	4	sp	Q9Y281	COF2_HUMAN
577	3.09	3.09	14.56	3.401	2.763	sp|Q9NZ08|ERAP1_HUMAN	Endoplasmic reticulum aminopeptidase 1 OS=Homo sapiens GN=ERAP1 PE=1 SV=3	HUMAN	2	sp	Q9NZ08	ERAP1_HUMAN
578	3.08	3.08	22.07	9.457	6.305	sp|Q10471|GALT2_HUMAN	Polypeptide N-acetylgalactosaminyltransferase 2 OS=Homo sapiens GN=GALNT2 PE=1 SV=1	HUMAN	2	sp	Q10471	GALT2_HUMAN
579	3.08	3.08	28.46	11.92	6.504	sp|P50502|F10A1_HUMAN	Hsc70-interacting protein OS=Homo sapiens GN=ST13 PE=1 SV=2	HUMAN	2	sp	P50502	F10A1_HUMAN
580	3.08	3.08	47.37	13.68	13.68	tr|E9PFN5|E9PFN5_HUMAN	Glutathione S-transferase kappa 1 OS=Homo sapiens GN=GSTK1 PE=1 SV=1	HUMAN	2	tr	E9PFN5	E9PFN5_HUMAN
581	3.06	3.13	18.36	6.638	5.367	tr|E7ER44|E7ER44_HUMAN	Lactotransferrin OS=Homo sapiens GN=LTF PE=1 SV=1	HUMAN	3	tr	E7ER44	E7ER44_HUMAN
582	3.04	3.04	25.89	18.75	9.821	sp|Q00688|FKBP3_HUMAN	Peptidyl-prolyl cis-trans isomerase FKBP3 OS=Homo sapiens GN=FKBP3 PE=1 SV=1	HUMAN	2	sp	Q00688	FKBP3_HUMAN
583	3.04	3.04	18.47	9.36	9.36	sp|Q9BY76|ANGL4_HUMAN	Angiopoietin-related protein 4 OS=Homo sapiens GN=ANGPTL4 PE=1 SV=2	HUMAN	2	sp	Q9BY76	ANGL4_HUMAN
584	3.02	3.02	13.23	2.362	2.362	sp|Q08211|DHX9_HUMAN	ATP-dependent RNA helicase A OS=Homo sapiens GN=DHX9 PE=1 SV=4	HUMAN	2	sp	Q08211	DHX9_HUMAN
585	3.01	3.01	30.3	22.73	12.63	sp|O43583|DENR_HUMAN	Density-regulated protein OS=Homo sapiens GN=DENR PE=1 SV=2	HUMAN	2	sp	O43583	DENR_HUMAN
586	2.99	2.99	38.26	8.725	8.725	sp|Q96CN7|ISOC1_HUMAN	Isochorismatase domain-containing protein 1 OS=Homo sapiens GN=ISOC1 PE=1 SV=3	HUMAN	2	sp	Q96CN7	ISOC1_HUMAN
587	2.99	2.99	20.31	20.31	20.31	tr|Q5VZR0|Q5VZR0_HUMAN	Golgi-associated plant pathogenesis-related protein 1 OS=Homo sapiens GN=GLIPR2 PE=1 SV=1	HUMAN	2	tr	Q5VZR0	Q5VZR0_HUMAN
588	2.96	2.96	17.61	8.099	8.099	tr|E9PGA6|E9PGA6_HUMAN	Protein C1QTNF3-AMACR OS=Homo sapiens GN=C1QTNF3-AMACR PE=4 SV=1	HUMAN	2	tr	E9PGA6	E9PGA6_HUMAN
589	2.94	2.94	37.17	18.14	13.72	tr|H0YKI0|H0YKI0_HUMAN	Deoxyuridine 5'-triphosphate nucleotidohydrolase, mitochondrial OS=Homo sapiens GN=DUT PE=1 SV=1	HUMAN	2	tr	H0YKI0	H0YKI0_HUMAN
590	2.93	2.93	53.54	31.31	31.31	sp|O43678|NDUA2_HUMAN	NADH dehydrogenase [ubiquinone] 1 alpha subcomplex subunit 2 OS=Homo sapiens GN=NDUFA2 PE=1 SV=3	HUMAN	2	sp	O43678	NDUA2_HUMAN
591	2.93	2.93	30.51	30.51	16.95	sp|O75348|VATG1_HUMAN	V-type proton ATPase subunit G 1 OS=Homo sapiens GN=ATP6V1G1 PE=1 SV=3	HUMAN	2	sp	O75348	VATG1_HUMAN
592	2.93	2.93	20.53	11.92	11.92	sp|O15511|ARPC5_HUMAN	Actin-related protein 2/3 complex subunit 5 OS=Homo sapiens GN=ARPC5 PE=1 SV=3	HUMAN	2	sp	O15511	ARPC5_HUMAN
593	2.89	2.95	10.21	4.085	2.042	sp|P53621|COPA_HUMAN	Coatomer subunit alpha OS=Homo sapiens GN=COPA PE=1 SV=2	HUMAN	2	sp	P53621	COPA_HUMAN
594	2.89	2.89	24.55	15.57	10.78	tr|E9PCT5|E9PCT5_HUMAN	Caveolin OS=Homo sapiens GN=CAV1 PE=1 SV=1	HUMAN	2	tr	E9PCT5	E9PCT5_HUMAN
595	2.85	2.96	17.13	9.786	8.257	sp|P62140|PP1B_HUMAN	Serine/threonine-protein phosphatase PP1-beta catalytic subunit OS=Homo sapiens GN=PPP1CB PE=1 SV=3	HUMAN	2	sp	P62140	PP1B_HUMAN
597	2.84	2.84	40.99	18.47	9.91	tr|J3KN29|J3KN29_HUMAN	26S proteasome non-ATPase regulatory subunit 9 OS=Homo sapiens GN=PSMD9 PE=1 SV=1	HUMAN	2	tr	J3KN29	J3KN29_HUMAN
598	2.84	2.84	20.66	11.16	11.16	tr|B1ANH6|B1ANH6_HUMAN	Guanylate kinase OS=Homo sapiens GN=GUK1 PE=1 SV=1	HUMAN	2	tr	B1ANH6	B1ANH6_HUMAN
599	2.83	3.28	17.57	5.671	3.181	sp|P26639|SYTC_HUMAN	Threonine--tRNA ligase, cytoplasmic OS=Homo sapiens GN=TARS PE=1 SV=3	HUMAN	2	sp	P26639	SYTC_HUMAN
600	2.83	2.83	22.03	5.769	4.72	sp|P48163|MAOX_HUMAN	NADP-dependent malic enzyme OS=Homo sapiens GN=ME1 PE=1 SV=1	HUMAN	4	sp	P48163	MAOX_HUMAN
601	2.83	2.83	20.87	10.43	7.634	sp|Q99536|VAT1_HUMAN	Synaptic vesicle membrane protein VAT-1 homolog OS=Homo sapiens GN=VAT1 PE=1 SV=2	HUMAN	3	sp	Q99536	VAT1_HUMAN
603	2.79	3.12	29.92	9.449	9.449	sp|P10644|KAP0_HUMAN	cAMP-dependent protein kinase type I-alpha regulatory subunit OS=Homo sapiens GN=PRKAR1A PE=1 SV=1	HUMAN	2	sp	P10644	KAP0_HUMAN
604	2.79	2.79	65.17	33.71	33.71	tr|E5RHG8|E5RHG8_HUMAN	Transcription elongation factor B polypeptide 1 (Fragment) OS=Homo sapiens GN=TCEB1 PE=1 SV=1	HUMAN	2	tr	E5RHG8	E5RHG8_HUMAN
605	2.76	2.76	39.89	15.73	15.73	sp|P62913|RL11_HUMAN	60S ribosomal protein L11 OS=Homo sapiens GN=RPL11 PE=1 SV=2	HUMAN	3	sp	P62913	RL11_HUMAN
606	2.76	2.76	39.08	29.31	18.39	tr|Q68DG0|Q68DG0_HUMAN	Heat shock protein beta-7 OS=Homo sapiens GN=DKFZp779D0968 PE=1 SV=1	HUMAN	2	tr	Q68DG0	Q68DG0_HUMAN
607	2.73	2.76	21.39	8.413	8.413	tr|E9PC52|E9PC52_HUMAN	Histone-binding protein RBBP7 OS=Homo sapiens GN=RBBP7 PE=1 SV=1	HUMAN	2	tr	E9PC52	E9PC52_HUMAN
608	2.73	2.75	24.74	9.756	5.575	sp|Q08397|LOXL1_HUMAN	Lysyl oxidase homolog 1 OS=Homo sapiens GN=LOXL1 PE=1 SV=2	HUMAN	2	sp	Q08397	LOXL1_HUMAN
609	2.71	2.71	45.97	40.76	27.96	sp|P26373|RL13_HUMAN	60S ribosomal protein L13 OS=Homo sapiens GN=RPL13 PE=1 SV=4	HUMAN	5	sp	P26373	RL13_HUMAN
610	2.71	2.71	27.63	9.211	6.14	sp|Q9Y265|RUVB1_HUMAN	RuvB-like 1 OS=Homo sapiens GN=RUVBL1 PE=1 SV=1	HUMAN	2	sp	Q9Y265	RUVB1_HUMAN
611	2.7	2.7	16.33	10.33	7	tr|B4DUC8|B4DUC8_HUMAN	S-methyl-5'-thioadenosine phosphorylase OS=Homo sapiens GN=MTAP PE=1 SV=1	HUMAN	2	tr	B4DUC8	B4DUC8_HUMAN
612	2.7	2.7	20.2	9.272	9.272	sp|P42126|ECI1_HUMAN	Enoyl-CoA delta isomerase 1, mitochondrial OS=Homo sapiens GN=ECI1 PE=1 SV=1	HUMAN	2	sp	P42126	ECI1_HUMAN
614	2.62	2.62	12.81	4.397	4.397	sp|P55287|CAD11_HUMAN	Cadherin-11 OS=Homo sapiens GN=CDH11 PE=1 SV=2	HUMAN	2	sp	P55287	CAD11_HUMAN
615	2.61	2.61	22.36	11.39	4.969	tr|A0A0A6YYH3|A0A0A6YYH3_HUMAN	Ubiquitin carboxyl-terminal hydrolase 14 OS=Homo sapiens GN=USP14 PE=1 SV=1	HUMAN	2	tr	A0A0A6YYH3	A0A0A6YYH3_HUMAN
616	2.6	2.62	14.02	6.739	6.739	tr|H7C2I1|H7C2I1_HUMAN	Protein arginine N-methyltransferase 1 OS=Homo sapiens GN=PRMT1 PE=1 SV=1	HUMAN	2	tr	H7C2I1	H7C2I1_HUMAN
617	2.6	2.6	5.95	1.826	1.826	sp|Q9UBG0|MRC2_HUMAN	C-type mannose receptor 2 OS=Homo sapiens GN=MRC2 PE=1 SV=2	HUMAN	2	sp	Q9UBG0	MRC2_HUMAN
619	2.58	2.58	35.65	17.39	17.39	sp|P14174|MIF_HUMAN	Macrophage migration inhibitory factor OS=Homo sapiens GN=MIF PE=1 SV=4	HUMAN	5	sp	P14174	MIF_HUMAN
620	2.55	32.37	64.52	56.45	37.9	tr|H7BYY1|H7BYY1_HUMAN	Tropomyosin 1 (Alpha), isoform CRA_m OS=Homo sapiens GN=TPM1 PE=1 SV=1	HUMAN	22	tr	H7BYY1	H7BYY1_HUMAN
622	2.49	2.49	29.35	29.35	29.35	sp|P62304|RUXE_HUMAN	Small nuclear ribonucleoprotein E OS=Homo sapiens GN=SNRPE PE=1 SV=1	HUMAN	3	sp	P62304	RUXE_HUMAN
623	2.48	2.48	26.05	7.843	7.843	sp|O00303|EIF3F_HUMAN	Eukaryotic translation initiation factor 3 subunit F OS=Homo sapiens GN=EIF3F PE=1 SV=1	HUMAN	2	sp	O00303	EIF3F_HUMAN
624	2.47	4.64	38.41	9.713	9.713	sp|P83110|HTRA3_HUMAN	Serine protease HTRA3 OS=Homo sapiens GN=HTRA3 PE=1 SV=2	HUMAN	4	sp	P83110	HTRA3_HUMAN
625	2.47	2.47	11.83	7.324	7.324	sp|P04899|GNAI2_HUMAN	Guanine nucleotide-binding protein G(i) subunit alpha-2 OS=Homo sapiens GN=GNAI2 PE=1 SV=3	HUMAN	2	sp	P04899	GNAI2_HUMAN
626	2.46	2.54	42.95	17.31	13.14	sp|Q96QR8|PURB_HUMAN	Transcriptional activator protein Pur-beta OS=Homo sapiens GN=PURB PE=1 SV=3	HUMAN	2	sp	Q96QR8	PURB_HUMAN
627	2.45	2.45	73.49	51.81	51.81	sp|P63220|RS21_HUMAN	40S ribosomal protein S21 OS=Homo sapiens GN=RPS21 PE=1 SV=1	HUMAN	5	sp	P63220	RS21_HUMAN
628	2.45	2.45	11.5	11.5	11.5	tr|E9PLX7|E9PLX7_HUMAN	60S ribosomal protein L27a OS=Homo sapiens GN=RPL27A PE=1 SV=1	HUMAN	2	tr	E9PLX7	E9PLX7_HUMAN
629	2.44	2.44	34.78	30.43	30.43	sp|P62857|RS28_HUMAN	40S ribosomal protein S28 OS=Homo sapiens GN=RPS28 PE=1 SV=1	HUMAN	2	sp	P62857	RS28_HUMAN
630	2.43	2.43	16.18	13.6	13.6	tr|F2Z2Y4|F2Z2Y4_HUMAN	Pyridoxal kinase OS=Homo sapiens GN=PDXK PE=1 SV=1	HUMAN	2	tr	F2Z2Y4	F2Z2Y4_HUMAN
631	2.43	2.43	22.22	16.24	16.24	tr|B0YIW2|B0YIW2_HUMAN	Apolipoprotein C-III OS=Homo sapiens GN=APOC3 PE=1 SV=1	HUMAN	2	tr	B0YIW2	B0YIW2_HUMAN
632	2.43	2.43	15.17	15.17	15.17	sp|O95816|BAG2_HUMAN	BAG family molecular chaperone regulator 2 OS=Homo sapiens GN=BAG2 PE=1 SV=1	HUMAN	2	sp	O95816	BAG2_HUMAN
633	2.42	2.42	25.32	8.318	5.545	sp|P48643|TCPE_HUMAN	T-complex protein 1 subunit epsilon OS=Homo sapiens GN=CCT5 PE=1 SV=1	HUMAN	3	sp	P48643	TCPE_HUMAN
634	2.42	2.42	28.81	28.81	9.972	sp|Q16769|QPCT_HUMAN	Glutaminyl-peptide cyclotransferase OS=Homo sapiens GN=QPCT PE=1 SV=1	HUMAN	2	sp	Q16769	QPCT_HUMAN
635	2.42	2.42	50	26.04	26.04	sp|P60468|SC61B_HUMAN	Protein transport protein Sec61 subunit beta OS=Homo sapiens GN=SEC61B PE=1 SV=2	HUMAN	2	sp	P60468	SC61B_HUMAN
637	2.41	2.41	50	18.56	18.04	sp|P62081|RS7_HUMAN	40S ribosomal protein S7 OS=Homo sapiens GN=RPS7 PE=1 SV=1	HUMAN	2	sp	P62081	RS7_HUMAN
638	2.41	2.41	38.14	10.23	10.23	sp|O75396|SC22B_HUMAN	Vesicle-trafficking protein SEC22b OS=Homo sapiens GN=SEC22B PE=1 SV=4	HUMAN	2	sp	O75396	SC22B_HUMAN
641	2.36	2.36	12.79	5.147	5.147	sp|Q96AC1|FERM2_HUMAN	Fermitin family homolog 2 OS=Homo sapiens GN=FERMT2 PE=1 SV=1	HUMAN	2	sp	Q96AC1	FERM2_HUMAN
642	2.36	2.36	20.63	20.63	15.08	sp|P62318|SMD3_HUMAN	Small nuclear ribonucleoprotein Sm D3 OS=Homo sapiens GN=SNRPD3 PE=1 SV=1	HUMAN	2	sp	P62318	SMD3_HUMAN
644	2.32	2.58	11.31	9.48	7.951	sp|O75436|VP26A_HUMAN	Vacuolar protein sorting-associated protein 26A OS=Homo sapiens GN=VPS26A PE=1 SV=2	HUMAN	2	sp	O75436	VP26A_HUMAN
646	2.29	2.29	23.62	7.362	7.362	sp|Q15717|ELAV1_HUMAN	ELAV-like protein 1 OS=Homo sapiens GN=ELAVL1 PE=1 SV=2	HUMAN	2	sp	Q15717	ELAV1_HUMAN
648	2.28	2.28	20.8	8.394	7.299	tr|A6NMH8|A6NMH8_HUMAN	Tetraspanin OS=Homo sapiens GN=CD81 PE=1 SV=1	HUMAN	2	tr	A6NMH8	A6NMH8_HUMAN
649	2.27	2.28	30.34	22.76	17.24	sp|P61254|RL26_HUMAN	60S ribosomal protein L26 OS=Homo sapiens GN=RPL26 PE=1 SV=1	HUMAN	3	sp	P61254	RL26_HUMAN
650	2.27	2.27	19.53	10.77	8.081	sp|Q15274|NADC_HUMAN	Nicotinate-nucleotide pyrophosphorylase [carboxylating] OS=Homo sapiens GN=QPRT PE=1 SV=3	HUMAN	2	sp	Q15274	NADC_HUMAN
651	2.26	3.86	6.34	1.754	1.259	sp|P12259|FA5_HUMAN	Coagulation factor V OS=Homo sapiens GN=F5 PE=1 SV=4	HUMAN	3	sp	P12259	FA5_HUMAN
653	2.24	2.24	12.69	7.214	4.975	sp|Q6UWY5|OLFL1_HUMAN	Olfactomedin-like protein 1 OS=Homo sapiens GN=OLFML1 PE=1 SV=2	HUMAN	2	sp	Q6UWY5	OLFL1_HUMAN
656	2.22	3.7	33.73	19.68	19.68	sp|P62753|RS6_HUMAN	40S ribosomal protein S6 OS=Homo sapiens GN=RPS6 PE=1 SV=1	HUMAN	4	sp	P62753	RS6_HUMAN
658	2.19	4.12	36.95	18.23	18.23	sp|P51153|RAB13_HUMAN	Ras-related protein Rab-13 OS=Homo sapiens GN=RAB13 PE=1 SV=1	HUMAN	3	sp	P51153	RAB13_HUMAN
660	2.19	2.19	25	25	25	sp|O14907|TX1B3_HUMAN	Tax1-binding protein 3 OS=Homo sapiens GN=TAX1BP3 PE=1 SV=2	HUMAN	2	sp	O14907	TX1B3_HUMAN
661	2.18	2.18	28.97	7.692	7.692	sp|P01137|TGFB1_HUMAN	Transforming growth factor beta-1 OS=Homo sapiens GN=TGFB1 PE=1 SV=2	HUMAN	2	sp	P01137	TGFB1_HUMAN
664	2.15	3.12	14.57	5.941	4.385	sp|P23246|SFPQ_HUMAN	Splicing factor, proline- and glutamine-rich OS=Homo sapiens GN=SFPQ PE=1 SV=2	HUMAN	2	sp	P23246	SFPQ_HUMAN
670	2.12	2.12	64.33	31.21	19.11	sp|P98179|RBM3_HUMAN	RNA-binding protein 3 OS=Homo sapiens GN=RBM3 PE=1 SV=1	HUMAN	2	sp	P98179	RBM3_HUMAN
671	2.11	2.11	25.75	4.478	4.478	sp|P04062|GLCM_HUMAN	Glucosylceramidase OS=Homo sapiens GN=GBA PE=1 SV=3	HUMAN	2	sp	P04062	GLCM_HUMAN
676	2.08	2.08	38.27	30.25	17.28	sp|O60493|SNX3_HUMAN	Sorting nexin-3 OS=Homo sapiens GN=SNX3 PE=1 SV=3	HUMAN	2	sp	O60493	SNX3_HUMAN
679	2.07	2.07	18.55	12.9	12.9	sp|Q9UHA4|LTOR3_HUMAN	Ragulator complex protein LAMTOR3 OS=Homo sapiens GN=LAMTOR3 PE=1 SV=1	HUMAN	2	sp	Q9UHA4	LTOR3_HUMAN
683	2.05	2.05	16.25	3.204	2.174	sp|Q9Y678|COPG1_HUMAN	Coatomer subunit gamma-1 OS=Homo sapiens GN=COPG1 PE=1 SV=1	HUMAN	2	sp	Q9Y678	COPG1_HUMAN
686	2.04	70.76	76.39	68.17	61.19	tr|Q3BDU5|Q3BDU5_HUMAN	Prelamin-A/C OS=Homo sapiens GN=LMNA PE=1 SV=1	HUMAN	43	tr	Q3BDU5	Q3BDU5_HUMAN
687	2.04	18.99	44.71	17.06	15.87	sp|P15311|EZRI_HUMAN	Ezrin OS=Homo sapiens GN=EZR PE=1 SV=4	HUMAN	10	sp	P15311	EZRI_HUMAN
688	2.04	2.57	27.82	4.184	4.184	sp|P04004|VTNC_HUMAN	Vitronectin OS=Homo sapiens GN=VTN PE=1 SV=1	HUMAN	2	sp	P04004	VTNC_HUMAN
694	2.03	43.59	82.04	47.89	47.89	tr|Q5TCU3|Q5TCU3_HUMAN	Tropomyosin beta chain OS=Homo sapiens GN=TPM2 PE=1 SV=1	HUMAN	29	tr	Q5TCU3	Q5TCU3_HUMAN
695	2.03	2.07	36.26	8.768	8.768	sp|O00231|PSD11_HUMAN	26S proteasome non-ATPase regulatory subunit 11 OS=Homo sapiens GN=PSMD11 PE=1 SV=3	HUMAN	3	sp	O00231	PSD11_HUMAN
698	2.02	2.02	7.315	1.299	1.299	sp|E9PAV3|NACAM_HUMAN	Nascent polypeptide-associated complex subunit alpha, muscle-specific form OS=Homo sapiens GN=NACA PE=1 SV=1	HUMAN	2	sp	E9PAV3	NACAM_HUMAN
706	2.01	2.03	30	3.71	3.71	tr|J9JID7|J9JID7_HUMAN	Lamin B2, isoform CRA_a OS=Homo sapiens GN=LMNB2 PE=1 SV=1	HUMAN	2	tr	J9JID7	J9JID7_HUMAN
707	2.01	2.02	25.71	14.69	6.531	tr|F8W696|F8W696_HUMAN	Apolipoprotein A-I OS=Homo sapiens GN=APOA1 PE=1 SV=1	HUMAN	2	tr	F8W696	F8W696_HUMAN
719	2.01	2.01	35.33	19.57	12.5	sp|O60565|GREM1_HUMAN	Gremlin-1 OS=Homo sapiens GN=GREM1 PE=1 SV=1	HUMAN	2	sp	O60565	GREM1_HUMAN
723	2	39.64	46.84	22.14	18.55	tr|A0A087WXW9|A0A087WXW9_HUMAN	Collagen alpha-1(V) chain OS=Homo sapiens GN=COL5A1 PE=1 SV=1	HUMAN	31	tr	A0A087WXW9	A0A087WXW9_HUMAN
724	2	26.99	47.45	42.57	41.02	sp|Q71U36|TBA1A_HUMAN	Tubulin alpha-1A chain OS=Homo sapiens GN=TUBA1A PE=1 SV=1	HUMAN	17	sp	Q71U36	TBA1A_HUMAN
725	2	9.24	65.79	46.71	40.13	sp|P15531|NDKA_HUMAN	Nucleoside diphosphate kinase A OS=Homo sapiens GN=NME1 PE=1 SV=1	HUMAN	5	sp	P15531	NDKA_HUMAN
726	2	6.01	21.18	10.26	10.26	sp|O43464|HTRA2_HUMAN	Serine protease HTRA2, mitochondrial OS=Homo sapiens GN=HTRA2 PE=1 SV=2	HUMAN	3	sp	O43464	HTRA2_HUMAN
727	2	3.5	11.86	1.784	1.784	sp|Q99460|PSMD1_HUMAN	26S proteasome non-ATPase regulatory subunit 1 OS=Homo sapiens GN=PSMD1 PE=1 SV=2	HUMAN	2	sp	Q99460	PSMD1_HUMAN
728	2	2.57	19.93	9.79	9.79	sp|P47755|CAZA2_HUMAN	F-actin-capping protein subunit alpha-2 OS=Homo sapiens GN=CAPZA2 PE=1 SV=3	HUMAN	2	sp	P47755	CAZA2_HUMAN
729	2	2.44	14.89	5.851	5.851	sp|P61163|ACTZ_HUMAN	Alpha-centractin OS=Homo sapiens GN=ACTR1A PE=1 SV=1	HUMAN	2	sp	P61163	ACTZ_HUMAN
741	2	2.01	15.45	1.966	1.966	tr|E7EWE5|E7EWE5_HUMAN	Peroxisomal multifunctional enzyme type 2 OS=Homo sapiens GN=HSD17B4 PE=1 SV=1	HUMAN	2	tr	E7EWE5	E7EWE5_HUMAN
742	2	2.01	7.819	0.9536	0.9536	sp|A1L4H1|SRCRL_HUMAN	Soluble scavenger receptor cysteine-rich domain-containing protein SSC5D OS=Homo sapiens GN=SSC5D PE=2 SV=3	HUMAN	2	sp	A1L4H1	SRCRL_HUMAN
765	2	2	15.88	4.936	4.936	sp|Q6ZVZ8|ASB18_HUMAN	Ankyrin repeat and SOCS box protein 18 OS=Homo sapiens GN=ASB18 PE=2 SV=2	HUMAN	2	sp	Q6ZVZ8	ASB18_HUMAN
779	2	2	24.55	9.545	9.545	sp|O75629|CREG1_HUMAN	Protein CREG1 OS=Homo sapiens GN=CREG1 PE=1 SV=1	HUMAN	3	sp	O75629	CREG1_HUMAN
796	1.95	2.05	36.13	20.17	20.17	sp|P62314|SMD1_HUMAN	Small nuclear ribonucleoprotein Sm D1 OS=Homo sapiens GN=SNRPD1 PE=1 SV=1	HUMAN	2	sp	P62314	SMD1_HUMAN
797	1.95	1.96	23.28	4.657	4.657	sp|Q8NC51|PAIRB_HUMAN	Plasminogen activator inhibitor 1 RNA-binding protein OS=Homo sapiens GN=SERBP1 PE=1 SV=2	HUMAN	2	sp	Q8NC51	PAIRB_HUMAN
799	1.92	1.92	50	20	20	sp|P20674|COX5A_HUMAN	Cytochrome c oxidase subunit 5A, mitochondrial OS=Homo sapiens GN=COX5A PE=1 SV=2	HUMAN	3	sp	P20674	COX5A_HUMAN
800	1.92	1.92	38.24	19.41	11.76	tr|H0YKD8|H0YKD8_HUMAN	60S ribosomal protein L28 OS=Homo sapiens GN=RPL28 PE=1 SV=1	HUMAN	2	tr	H0YKD8	H0YKD8_HUMAN
801	1.91	1.91	21.52	7.787	5.943	sp|P00742|FA10_HUMAN	Coagulation factor X OS=Homo sapiens GN=F10 PE=1 SV=2	HUMAN	3	sp	P00742	FA10_HUMAN
803	1.89	67.99	48.28	29.77	25.57	tr|A0A087WWA5|A0A087WWA5_HUMAN	Tenascin-X OS=Homo sapiens GN=TNXB PE=1 SV=1	HUMAN	39	tr	A0A087WWA5	A0A087WWA5_HUMAN
805	1.89	1.89	24.52	24.52	12.26	tr|C9J0K6|C9J0K6_HUMAN	Sorcin OS=Homo sapiens GN=SRI PE=1 SV=1	HUMAN	2	tr	C9J0K6	C9J0K6_HUMAN
806	1.87	1.87	34.88	23.26	23.26	sp|P10606|COX5B_HUMAN	Cytochrome c oxidase subunit 5B, mitochondrial OS=Homo sapiens GN=COX5B PE=1 SV=2	HUMAN	2	sp	P10606	COX5B_HUMAN
809	1.8	2.85	26.98	12.09	12.09	sp|P61106|RAB14_HUMAN	Ras-related protein Rab-14 OS=Homo sapiens GN=RAB14 PE=1 SV=4	HUMAN	2	sp	P61106	RAB14_HUMAN
810	1.79	1.79	24.47	8.017	8.017	sp|Q9ULC3|RAB23_HUMAN	Ras-related protein Rab-23 OS=Homo sapiens GN=RAB23 PE=1 SV=1	HUMAN	2	sp	Q9ULC3	RAB23_HUMAN
816	1.74	1.74	45.61	10.09	10.09	tr|A0A0A6YYL6|A0A0A6YYL6_HUMAN	Protein RPL17-C18orf32 OS=Homo sapiens GN=RPL17-C18orf32 PE=1 SV=1	HUMAN	2	tr	A0A0A6YYL6	A0A0A6YYL6_HUMAN
818	1.73	1.73	52.33	29.07	29.07	sp|Q9H3K6|BOLA2_HUMAN	BolA-like protein 2 OS=Homo sapiens GN=BOLA2 PE=1 SV=1	HUMAN	2	sp	Q9H3K6	BOLA2_HUMAN
819	1.72	22.19	27.23	18.44	18.44	tr|A0A0B4J269|A0A0B4J269_HUMAN	Tubulin beta-3 chain OS=Homo sapiens GN=TUBB3 PE=4 SV=1	HUMAN	18	tr	A0A0B4J269	A0A0B4J269_HUMAN
822	1.71	2.42	44.51	12.54	6.897	sp|P09525|ANXA4_HUMAN	Annexin A4 OS=Homo sapiens GN=ANXA4 PE=1 SV=4	HUMAN	2	sp	P09525	ANXA4_HUMAN
823	1.7	3.53	17.16	11.27	11.27	sp|P62070|RRAS2_HUMAN	Ras-related protein R-Ras2 OS=Homo sapiens GN=RRAS2 PE=1 SV=1	HUMAN	2	sp	P62070	RRAS2_HUMAN
824	1.7	1.71	25.58	11	11	sp|P38159|RBMX_HUMAN	RNA-binding motif protein, X chromosome OS=Homo sapiens GN=RBMX PE=1 SV=3	HUMAN	3	sp	P38159	RBMX_HUMAN
825	1.69	1.69	15.03	5.812	4.409	sp|P05546|HEP2_HUMAN	Heparin cofactor 2 OS=Homo sapiens GN=SERPIND1 PE=1 SV=3	HUMAN	2	sp	P05546	HEP2_HUMAN
829	1.64	3.24	5.288	2.35	2.35	sp|Q03167|TGBR3_HUMAN	Transforming growth factor beta receptor type 3 OS=Homo sapiens GN=TGFBR3 PE=1 SV=3	HUMAN	2	sp	Q03167	TGBR3_HUMAN
830	1.64	2.64	22.7	3.242	3.242	sp|Q9UHD8|SEPT9_HUMAN	Septin-9 OS=Homo sapiens GN=SEPT9 PE=1 SV=2	HUMAN	3	sp	Q9UHD8	SEPT9_HUMAN
834	1.59	3.8	24.04	7.018	4.035	sp|Q14195|DPYL3_HUMAN	Dihydropyrimidinase-related protein 3 OS=Homo sapiens GN=DPYSL3 PE=1 SV=1	HUMAN	2	sp	Q14195	DPYL3_HUMAN
835	1.58	1.58	33.6	13.76	13.76	sp|Q16543|CDC37_HUMAN	Hsp90 co-chaperone Cdc37 OS=Homo sapiens GN=CDC37 PE=1 SV=1	HUMAN	3	sp	Q16543	CDC37_HUMAN
837	1.58	1.58	14.11	8.871	8.871	sp|Q8N129|CNPY4_HUMAN	Protein canopy homolog 4 OS=Homo sapiens GN=CNPY4 PE=2 SV=1	HUMAN	2	sp	Q8N129	CNPY4_HUMAN
838	1.57	1.57	28.1	5.823	5.823	sp|Q13510|ASAH1_HUMAN	Acid ceramidase OS=Homo sapiens GN=ASAH1 PE=1 SV=5	HUMAN	2	sp	Q13510	ASAH1_HUMAN
839	1.56	3.46	11.32	8.445	6.334	sp|O00629|IMA3_HUMAN	Importin subunit alpha-3 OS=Homo sapiens GN=KPNA4 PE=1 SV=1	HUMAN	3	sp	O00629	IMA3_HUMAN
842	1.54	3.4	15.81	1.782	1.225	sp|Q92973|TNPO1_HUMAN	Transportin-1 OS=Homo sapiens GN=TNPO1 PE=1 SV=2	HUMAN	2	sp	Q92973	TNPO1_HUMAN
845	1.52	1.52	43.07	18.98	18.98	sp|P52758|UK114_HUMAN	Ribonuclease UK114 OS=Homo sapiens GN=HRSP12 PE=1 SV=1	HUMAN	2	sp	P52758	UK114_HUMAN
847	1.49	1.49	18.68	2.941	2.941	sp|Q03692|COAA1_HUMAN	Collagen alpha-1(X) chain OS=Homo sapiens GN=COL10A1 PE=1 SV=2	HUMAN	2	sp	Q03692	COAA1_HUMAN
849	1.48	1.48	28.03	14.65	14.01	sp|P83731|RL24_HUMAN	60S ribosomal protein L24 OS=Homo sapiens GN=RPL24 PE=1 SV=1	HUMAN	2	sp	P83731	RL24_HUMAN
850	1.47	3.65	27.73	13.71	10.28	tr|F8VZX2|F8VZX2_HUMAN	Poly(rC)-binding protein 2 OS=Homo sapiens GN=PCBP2 PE=1 SV=1	HUMAN	2	tr	F8VZX2	F8VZX2_HUMAN
857	1.43	1.43	41.86	27.91	17.44	sp|P14854|CX6B1_HUMAN	Cytochrome c oxidase subunit 6B1 OS=Homo sapiens GN=COX6B1 PE=1 SV=2	HUMAN	2	sp	P14854	CX6B1_HUMAN
858	1.42	9.26	37.41	13.65	11.52	sp|P02538|K2C6A_HUMAN	Keratin, type II cytoskeletal 6A OS=Homo sapiens GN=KRT6A PE=1 SV=3	HUMAN	7	sp	P02538	K2C6A_HUMAN
863	1.4	1.4	38.1	23.33	16.67	sp|Q96IU4|ABHEB_HUMAN	Alpha/beta hydrolase domain-containing protein 14B OS=Homo sapiens GN=ABHD14B PE=1 SV=1	HUMAN	2	sp	Q96IU4	ABHEB_HUMAN
871	1.33	1.39	33.72	27.91	12.21	sp|P24844|MYL9_HUMAN	Myosin regulatory light polypeptide 9 OS=Homo sapiens GN=MYL9 PE=1 SV=4	HUMAN	2	sp	P24844	MYL9_HUMAN
874	1.31	1.39	4.367	2.329	1.31	tr|A0A087X0K0|A0A087X0K0_HUMAN	Collagen alpha-1(XV) chain OS=Homo sapiens GN=COL15A1 PE=1 SV=1	HUMAN	2	tr	A0A087X0K0	A0A087X0K0_HUMAN
880	1.28	1.28	22.65	10.12	7.711	sp|P05120|PAI2_HUMAN	Plasminogen activator inhibitor 2 OS=Homo sapiens GN=SERPINB2 PE=1 SV=2	HUMAN	3	sp	P05120	PAI2_HUMAN
882	1.27	3.3	16.75	12.44	12.44	sp|P26583|HMGB2_HUMAN	High mobility group protein B2 OS=Homo sapiens GN=HMGB2 PE=1 SV=2	HUMAN	2	sp	P26583	HMGB2_HUMAN
889	1.24	1.24	15.49	12.68	12.68	tr|F2Z2Y8|F2Z2Y8_HUMAN	Toll-interacting protein OS=Homo sapiens GN=TOLLIP PE=1 SV=1	HUMAN	2	tr	F2Z2Y8	F2Z2Y8_HUMAN
891	1.22	1.22	24.6	16.67	16.67	sp|P49773|HINT1_HUMAN	Histidine triad nucleotide-binding protein 1 OS=Homo sapiens GN=HINT1 PE=1 SV=2	HUMAN	2	sp	P49773	HINT1_HUMAN
897	1.19	1.29	41.15	9.476	6.733	sp|O00300|TR11B_HUMAN	Tumor necrosis factor receptor superfamily member 11B OS=Homo sapiens GN=TNFRSF11B PE=1 SV=3	HUMAN	2	sp	O00300	TR11B_HUMAN
898	1.19	1.19	38.46	10.44	6.044	sp|P55145|MANF_HUMAN	Mesencephalic astrocyte-derived neurotrophic factor OS=Homo sapiens GN=MANF PE=1 SV=3	HUMAN	2	sp	P55145	MANF_HUMAN
929	1.02	97.71	74.01	68.07	63.49	tr|B1ALD9|B1ALD9_HUMAN	Periostin OS=Homo sapiens GN=POSTN PE=1 SV=1	HUMAN	101	tr	B1ALD9	B1ALD9_HUMAN
930	1.02	1.04	11.82	3.941	3.695	sp|P05154|IPSP_HUMAN	Plasma serine protease inhibitor OS=Homo sapiens GN=SERPINA5 PE=1 SV=3	HUMAN	3	sp	P05154	IPSP_HUMAN
936	0.99	0.99	24.7	3.239	3.239	sp|Q08170|SRSF4_HUMAN	Serine/arginine-rich splicing factor 4 OS=Homo sapiens GN=SRSF4 PE=1 SV=2	HUMAN	2	sp	Q08170	SRSF4_HUMAN
937	0.99	0.99	40.29	40.29	30.94	tr|A0A087WV45|A0A087WV45_HUMAN	Transthyretin OS=Homo sapiens GN=TTR PE=1 SV=1	HUMAN	4	tr	A0A087WV45	A0A087WV45_HUMAN
962	0.82	0.82	22.19	10.97	10.97	sp|Q8WVQ1|CANT1_HUMAN	Soluble calcium-activated nucleotidase 1 OS=Homo sapiens GN=CANT1 PE=1 SV=1	HUMAN	2	sp	Q8WVQ1	CANT1_HUMAN
969	0.78	66.12	88.99	83.26	80.18	tr|A0A087WWU8|A0A087WWU8_HUMAN	Tropomyosin alpha-3 chain OS=Homo sapiens GN=TPM3 PE=1 SV=1	HUMAN	43	tr	A0A087WWU8	A0A087WWU8_HUMAN
973	0.77	4.98	35.25	17.21	14.21	sp|Q07000|1C15_HUMAN	HLA class I histocompatibility antigen, Cw-15 alpha chain OS=Homo sapiens GN=HLA-C PE=1 SV=1	HUMAN	3	sp	Q07000	1C15_HUMAN
979	0.74	4.84	47.29	17.33	14.44	sp|O75828|CBR3_HUMAN	Carbonyl reductase [NADPH] 3 OS=Homo sapiens GN=CBR3 PE=1 SV=3	HUMAN	3	sp	O75828	CBR3_HUMAN
983	0.72	2.26	19.54	6.897	6.897	tr|A6XMV9|A6XMV9_HUMAN	Protease serine 2 preproprotein OS=Homo sapiens GN=PRSS3P2 PE=2 SV=1	HUMAN	2	tr	A6XMV9	A6XMV9_HUMAN
988	0.7	2.83	11.96	6.522	6.522	sp|P28062|PSB8_HUMAN	Proteasome subunit beta type-8 OS=Homo sapiens GN=PSMB8 PE=1 SV=3	HUMAN	2	sp	P28062	PSB8_HUMAN
1014	0.58	0.58	31	15.5	12.5	tr|X1WI28|X1WI28_HUMAN	60S ribosomal protein L10 (Fragment) OS=Homo sapiens GN=RPL10 PE=1 SV=3	HUMAN	2	tr	X1WI28	X1WI28_HUMAN
1033	0.51	38.32	62.86	57.56	43.24	sp|P68133|ACTS_HUMAN	Actin, alpha skeletal muscle OS=Homo sapiens GN=ACTA1 PE=1 SV=1	HUMAN	35	sp	P68133	ACTS_HUMAN
1040	0.44	2.56	31.99	7.839	5.508	sp|P02533|K1C14_HUMAN	Keratin, type I cytoskeletal 14 OS=Homo sapiens GN=KRT14 PE=1 SV=4	HUMAN	3	sp	P02533	K1C14_HUMAN
1046	0.42	3.37	37.81	30.35	10.95	sp|Q9H0U4|RAB1B_HUMAN	Ras-related protein Rab-1B OS=Homo sapiens GN=RAB1B PE=1 SV=1	HUMAN	2	sp	Q9H0U4	RAB1B_HUMAN
1059	0.39	0.39	14.95	14.95	14.95	sp|P09341|GROA_HUMAN	Growth-regulated alpha protein OS=Homo sapiens GN=CXCL1 PE=1 SV=1	HUMAN	2	sp	P09341	GROA_HUMAN
1065	0.37	4.82	36.05	4.097	3.101	sp|P12107|COBA1_HUMAN	Collagen alpha-1(XI) chain OS=Homo sapiens GN=COL11A1 PE=1 SV=4	HUMAN	5	sp	P12107	COBA1_HUMAN
1152	0.2	4.45	27.92	12.65	10.26	sp|Q00888|PSG4_HUMAN	Pregnancy-specific beta-1-glycoprotein 4 OS=Homo sapiens GN=PSG4 PE=2 SV=3	HUMAN	3	sp	Q00888	PSG4_HUMAN
1260	0.1	6.51	43.85	38.46	35.38	sp|P04908|H2A1B_HUMAN	Histone H2A type 1-B/E OS=Homo sapiens GN=HIST1H2AB PE=1 SV=2	HUMAN	4	sp	P04908	H2A1B_HUMAN
1335	0.07	0.07	43.38	7.379	7.379	RRRRRtr|F8WAH6|F8WAH6_HUMAN	REVERSED Elastin OS=Homo sapiens GN=ELN PE=1 SV=2	HUMAN	3	RRRRRtr	F8WAH6	F8WAH6_HUMAN
1384	0.05	3.55	10.63	1.704	1.404	sp|Q7Z406|MYH14_HUMAN	Myosin-14 OS=Homo sapiens GN=MYH14 PE=1 SV=2	HUMAN	3	sp	Q7Z406	MYH14_HUMAN
